# Supplementary material for: The YTHDF proteins ECT2 and ECT3 bind largely overlapping target sets and influence target mRNA abundance, not alternative polyadenylation
Source: eLife journal article supplement (doi:10.7554/elife.72377), 2021-09-30
Supplement: supp [file elife-72377-supp-v1.zip]

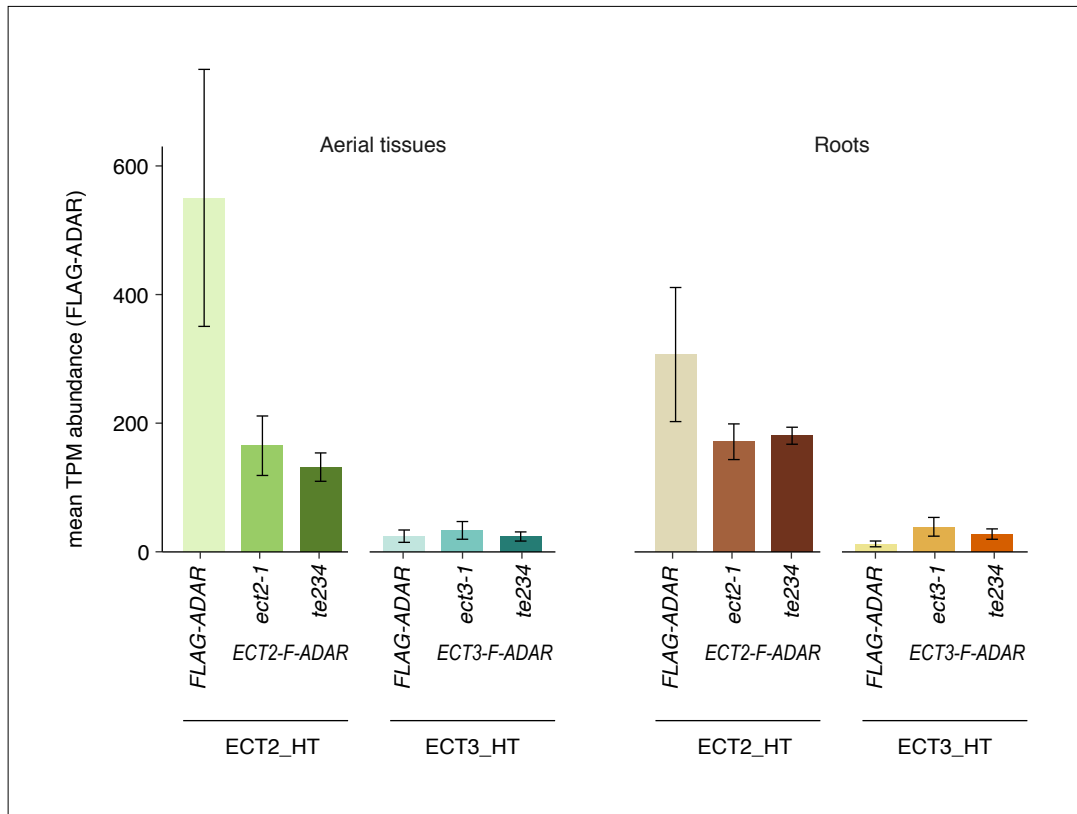

**Figure 3—figure supplement 1. Expression levels (TPM) of the FLAG-ADAR-containing transgenes in all HyperTRIBE lines.** TPMs for the five lines of every type have been averaged for simplicity. Notice that expression of ECT2/3-FLAG-ADAR transgenes is highly comparable in triple and single mutant backgrounds, ruling out the possibility of higher editing proportions in the triple mutant background due to higher abundance of the transgene. The expression of ECT3-FLAG-ADAR is generally lower than that of ECT2-FLAG-ADAR, as expected from the relative abundance of the endogenous transcripts (Arribas-Hernández et al., 2018).
