# Supplementary material for: The YTHDF proteins ECT2 and ECT3 bind largely overlapping target sets and influence target mRNA abundance, not alternative polyadenylation
Source: eLife journal article supplement (doi:10.7554/elife.72377), 2021-09-30
Supplement: supp [file elife-72377-supp-v1.zip]

Archive with 20 entries (20 files):
- elife_poa_e72377_Supplementary_file_1.xlsx
- elife_poa_e72377_Supplementary_file_2.xlsx
- elife_poa_e72377_Supplementary_file_3.xlsx
- elife_poa_e72377_Supplementary_file_4.xlsx
- elife_poa_e72377_Supplementary_file_5.xlsx
- elife_poa_e72377_Supplementary_file_6.xlsx
- elife_poa_e72377_Figure_5_source_data_1.zip
- elife_poa_e72377_Transparent_Reporting_File.pdf
- elife_poa_e72377_Figure_1_figure_supplement_1.pdf
- elife_poa_e72377_Figure_1_figure_supplement_2.pdf
- elife_poa_e72377_Figure_2_figure_supplement_1.pdf
- elife_poa_e72377_Figure_2_figure_supplement_2.pdf
- elife_poa_e72377_Figure_3_figure_supplement_1.pdf
- elife_poa_e72377_Figure_3_figure_supplement_2.pdf
- elife_poa_e72377_Figure_4_figure_supplement_1.pdf
- elife_poa_e72377_Figure_4_figure_supplement_2.pdf
- elife_poa_e72377_Figure_5_figure_supplement_1.pdf
- elife_poa_e72377_Figure_5_figure_supplement_2.pdf
- elife_poa_e72377_Figure_6_figure_supplement_1.pdf
- elife_poa_e72377_Figure_7_figure_supplement_1.pdf
