# Supplementary material for: The YTHDF proteins ECT2 and ECT3 bind largely overlapping target sets and influence target mRNA abundance, not alternative polyadenylation
Source: eLife journal article supplement (doi:10.7554/elife.72377), 2021-09-30
Supplement: supp [file elife-72377-supp-v1.zip]

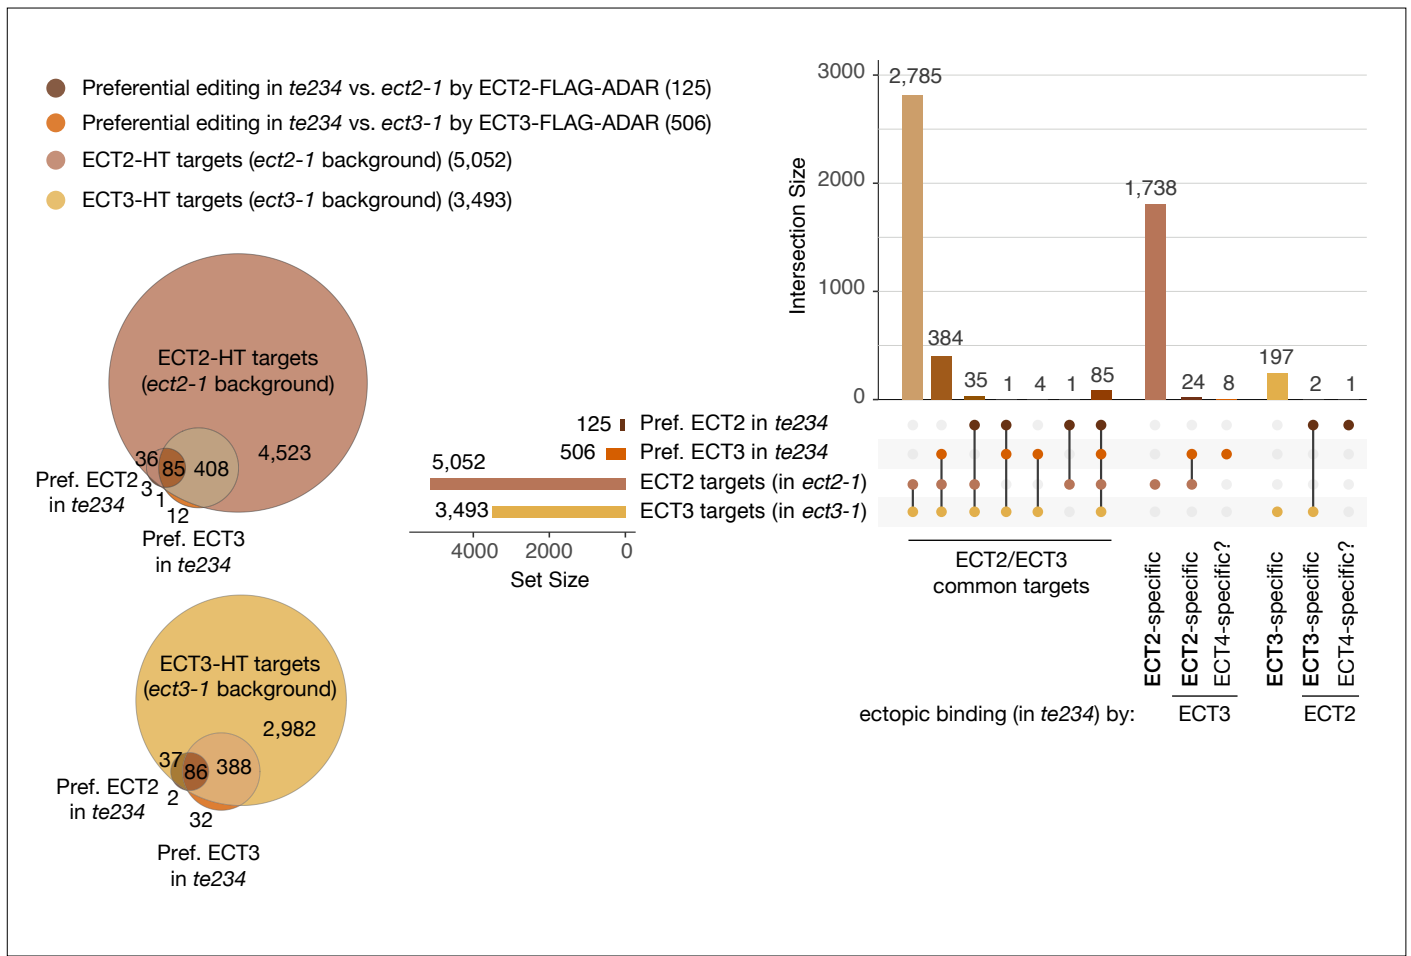

**Figure 3—figure supplement 2. Overlap between ECT2/3-HT targets in single and triple mutant background in roots.** Venn diagrams (left) and Upset plot (right) showing the overlap between the ECT2 and ECT3-HT target sets (in single mutant backgrounds) with the groups of genes with more highly edited positions in the triple mutant background in roots (the equivalent for aerial tissues is shown in [Figure 3D,E](#)).
