# Supplementary material for: The YTHDF proteins ECT2 and ECT3 bind largely overlapping target sets and influence target mRNA abundance, not alternative polyadenylation
Source: eLife journal article supplement (doi:10.7554/elife.72377), 2021-09-30
Supplement: supp [file elife-72377-supp-v1.zip]

Figure 5—SourceData1

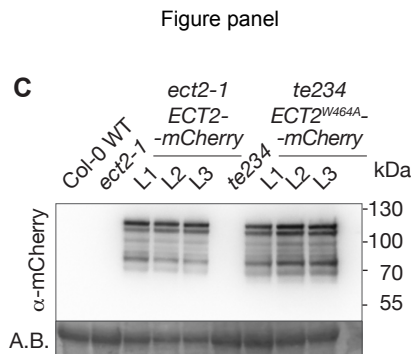

$\alpha$ -mCherry western blot  
(chemiluminescence)

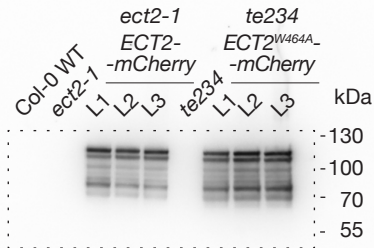

Source Data 2

Amido black staining

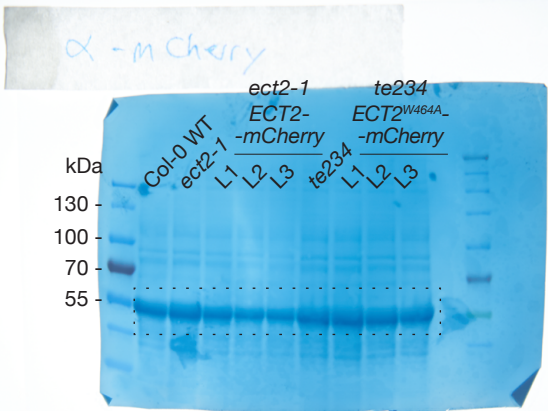

Source Data 3

Dotted outlines indicate the cropping applied to the figure
