# Supplementary material for: The YTHDF proteins ECT2 and ECT3 bind largely overlapping target sets and influence target mRNA abundance, not alternative polyadenylation
Source: eLife journal article supplement (doi:10.7554/elife.72377), 2021-09-30
Supplement: supp [file elife-72377-supp-v1.zip › elife_poa_e72377_Figure_1_figure_supplement_2.pdf]

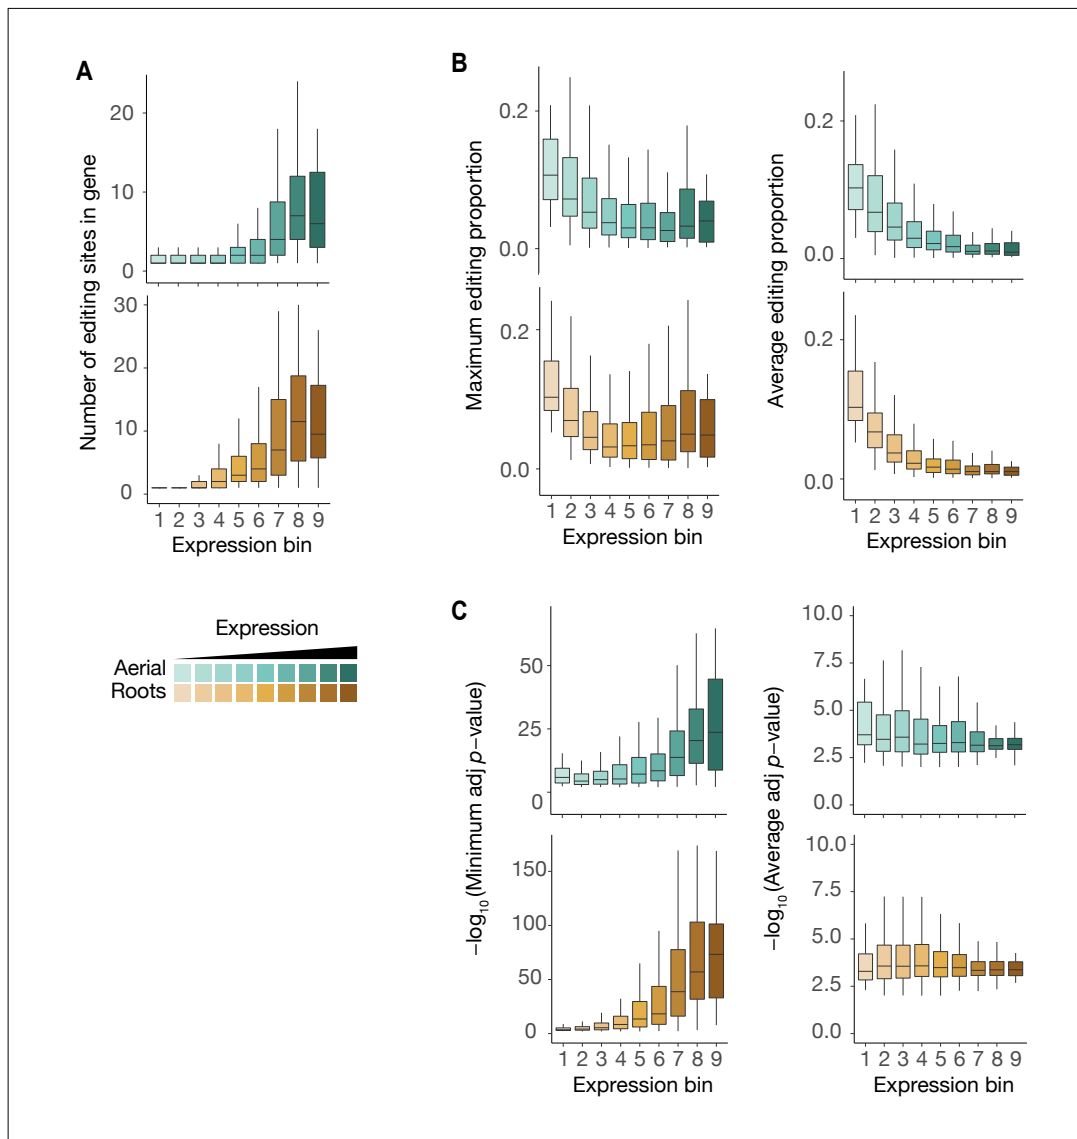

**Figure 1—figure supplement 2. Characteristics of ECT3-HyperTRIBE editing sites relative to target expression levels. (A-C)** Number of significant editing sites (A), maximum or average editing proportions (B), and significance of editing sites according to either minimum or average  $-\log_{10}(\text{adjusted } p\text{-value})$  per gene (C) in ECT3-HT targets split according to their expression levels (mean  $\log_2(\text{TPM}+1)$  over the five ECT3-HT control samples), in both aerial and root tissues.
