# Supplementary material for: The YTHDF proteins ECT2 and ECT3 bind largely overlapping target sets and influence target mRNA abundance, not alternative polyadenylation
Source: eLife journal article supplement (doi:10.7554/elife.72377), 2021-09-30
Supplement: supp [file elife-72377-supp-v1.zip › elife_poa_e72377_Figure_2_figure_supplement_1.pdf]

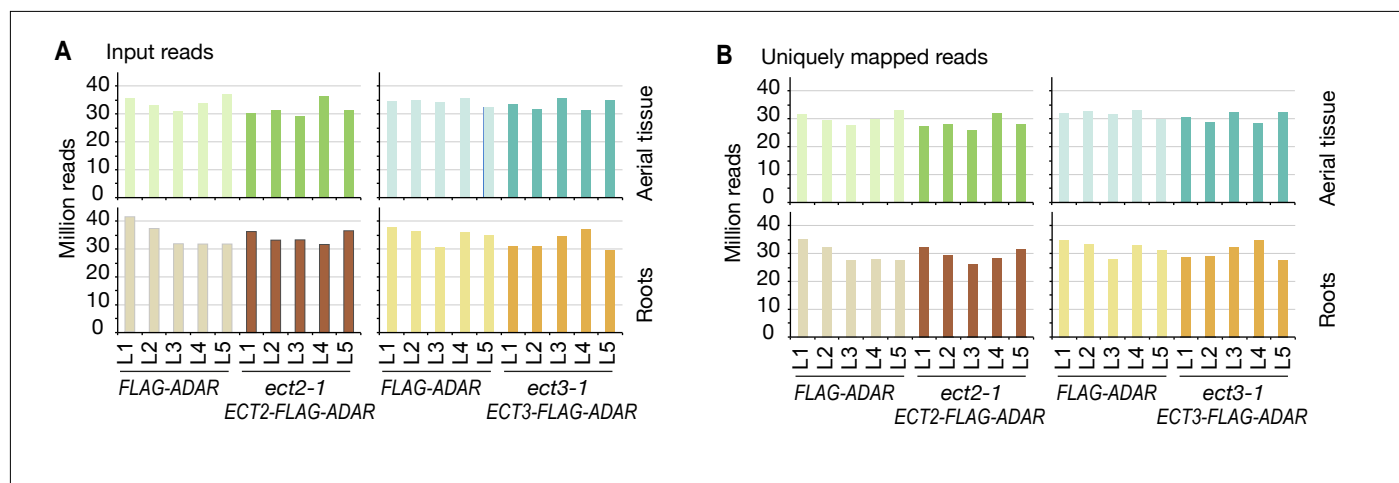

**Figure 2—figure supplement 1. Sequencing depth of ECT2 and ECT3 HyperTRIBE RNA-seq data. (A,B)** Number of input reads (A) and uniquely mapped reads (B) for ECT2-HT and ECT3-HT RNA-seq samples.
