# Supplementary material for: The YTHDF proteins ECT2 and ECT3 bind largely overlapping target sets and influence target mRNA abundance, not alternative polyadenylation
Source: eLife journal article supplement (doi:10.7554/elife.72377), 2021-09-30
Supplement: supp [file elife-72377-supp-v1.zip › elife_poa_e72377_Figure_2_figure_supplement_2.pdf]

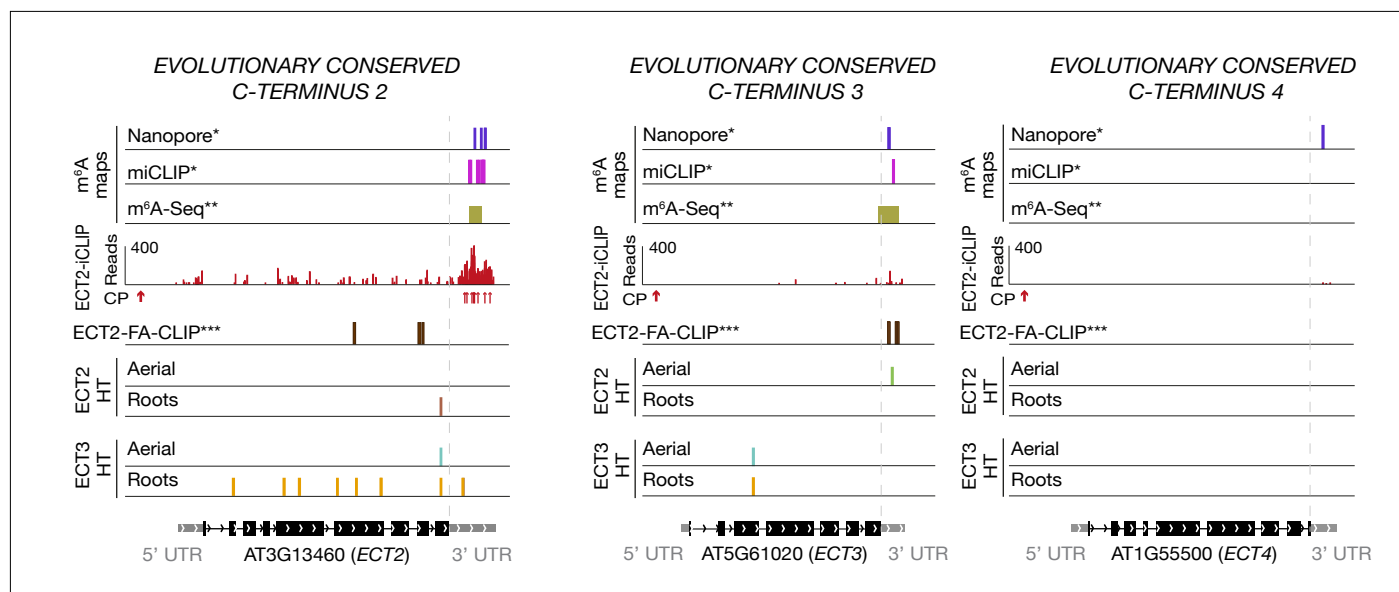

**Figure 2—figure supplement 2. ECT2 and ECT3 target each other and themselves.** Distribution of ECT2/3-HT editing sites and ECT2-iCLIP peaks along *ECT2/3/4*-encoding transcripts. *ECT2* is a target of ECT3, particularly clearly in roots, and *ECT3* is a target of ECT2 according to ECT2-HT in aerial tissues (not confirmed by ECT2-iCLIP). Although self-targeting of *ECT2* and *ECT3* may also be taken into consideration, it is important to notice that these targeted transcripts originate from transgenes. *ECT4* (right panel) does not appear as ECT2/3 target, but its low expression levels might account for a false negative. FA-CLIP peaks\*\*\*, and m<sup>6</sup>A sites\*\* are shown as a reference. \* Parker et al. (2020); \*\* Shen et al. (2016); \*\*\* Wei et al. (2018)
