# Supplementary material for: The YTHDF proteins ECT2 and ECT3 bind largely overlapping target sets and influence target mRNA abundance, not alternative polyadenylation
Source: eLife journal article supplement (doi:10.7554/elife.72377), 2021-09-30
Supplement: supp [file elife-72377-supp-v1.zip › elife_poa_e72377_Figure_4_figure_supplement_1.pdf]

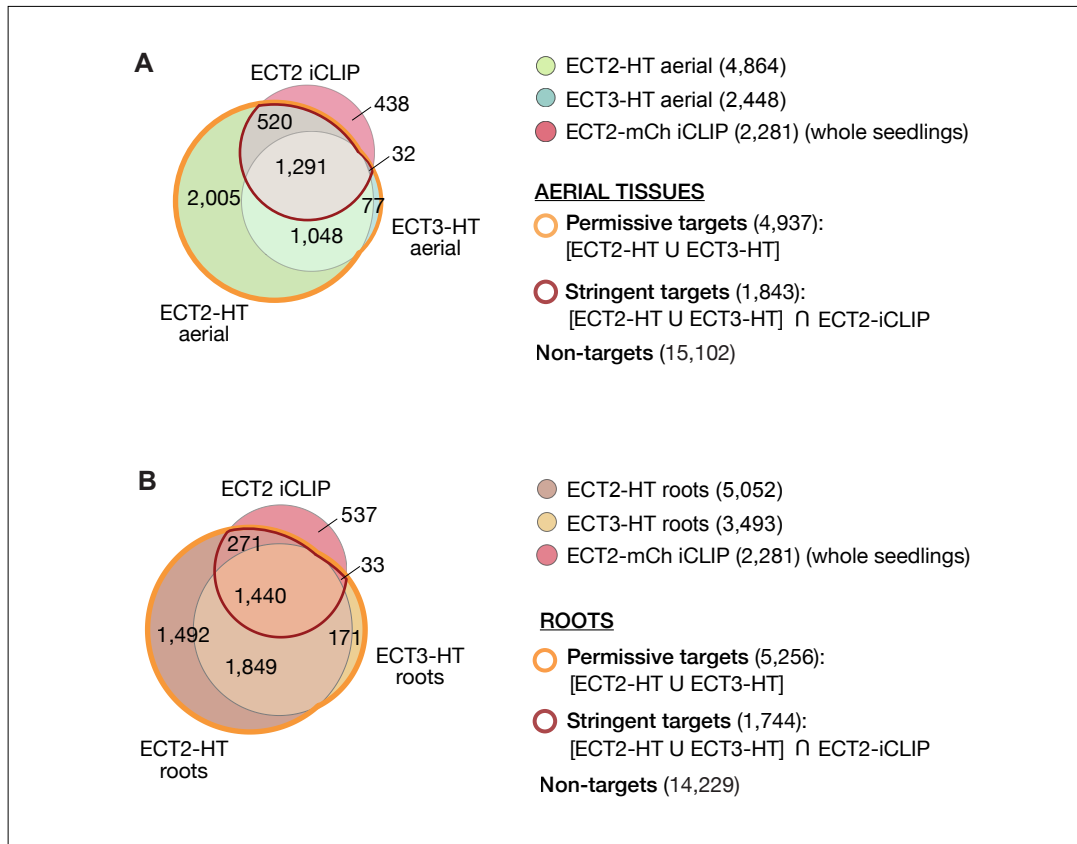

**Figure 4—figure supplement 1. ECT2 and ECT3 target sets in aerial and root tissues. (A,B)** Overlap between HyperTRIBE target sets of ECT2 and ECT3 in aerial tissue (A) or roots (B), and ECT2-iCLIP (whole seedlings). Genes contained within the outlined sets in roots constitute the permissive (orange outline) and stringent (dark red outline) ECT2/3 target sets ([Supplementary File 4](#)) for the subsequent transcriptome analyses of sorted root protoplasts. Non-targets are all genes with detectable transcript levels in the ECT2 or ECT3 (aerial or root) HT RNA-Seq datasets that are not in the permissive target set.
