# Supplementary material for: The YTHDF proteins ECT2 and ECT3 bind largely overlapping target sets and influence target mRNA abundance, not alternative polyadenylation
Source: eLife journal article supplement (doi:10.7554/elife.72377), 2021-09-30
Supplement: supp [file elife-72377-supp-v1.zip › elife_poa_e72377_Figure_5_figure_supplement_1.pdf]

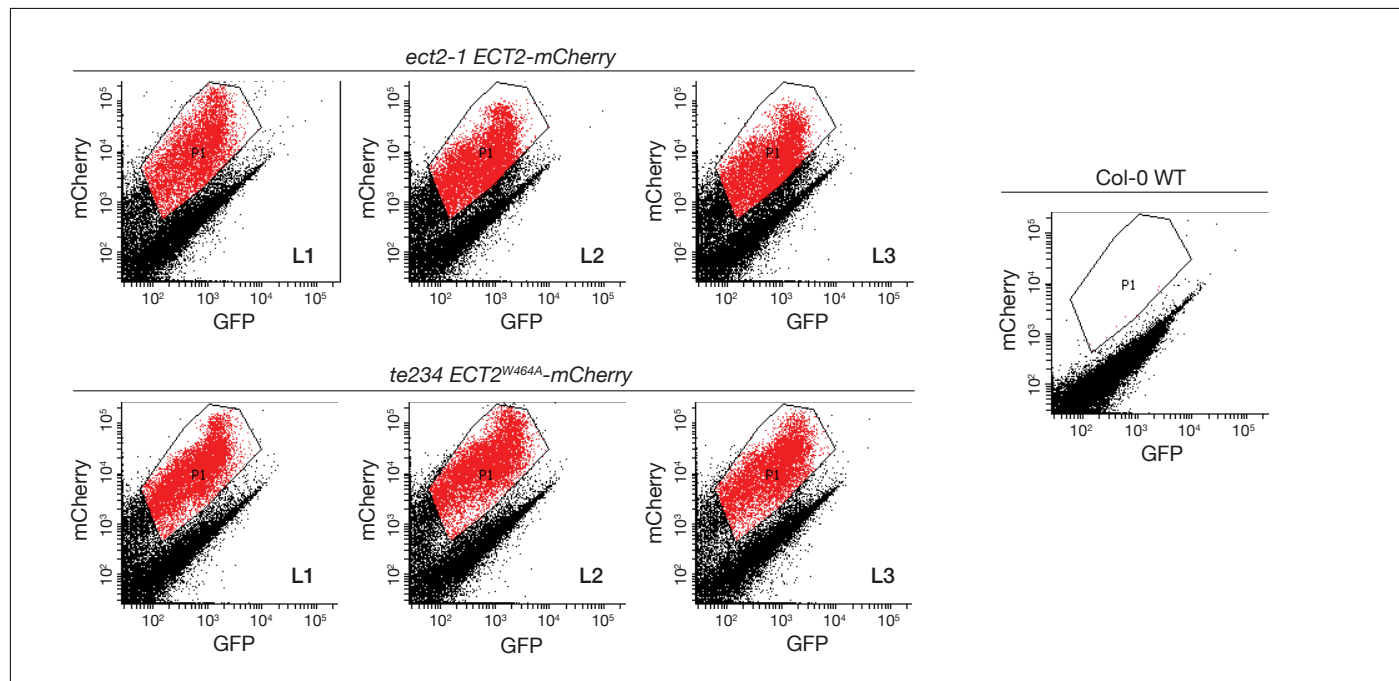

**Figure 5—figure supplement 1. FACS-sorting of root protoplasts expressing ECT2-mCherry.** Fluorescence profile (mCherry vs. GFP fluorescence) of root cells (protoplasts) from the transgenic lines used as replicates for transcriptomic analyses (Figures 5, 7). Non-transgenic Col-0 WT is shown as control for background autofluorescence. Cells with a fluorescence profile within the outlined areas were selected for RNA extraction, Smart-seq2 library construction and sequencing.
