# Supplementary material for: The YTHDF proteins ECT2 and ECT3 bind largely overlapping target sets and influence target mRNA abundance, not alternative polyadenylation
Source: eLife journal article supplement (doi:10.7554/elife.72377), 2021-09-30
Supplement: supp [file elife-72377-supp-v1.zip › elife_poa_e72377_Figure_5_figure_supplement_2.pdf]

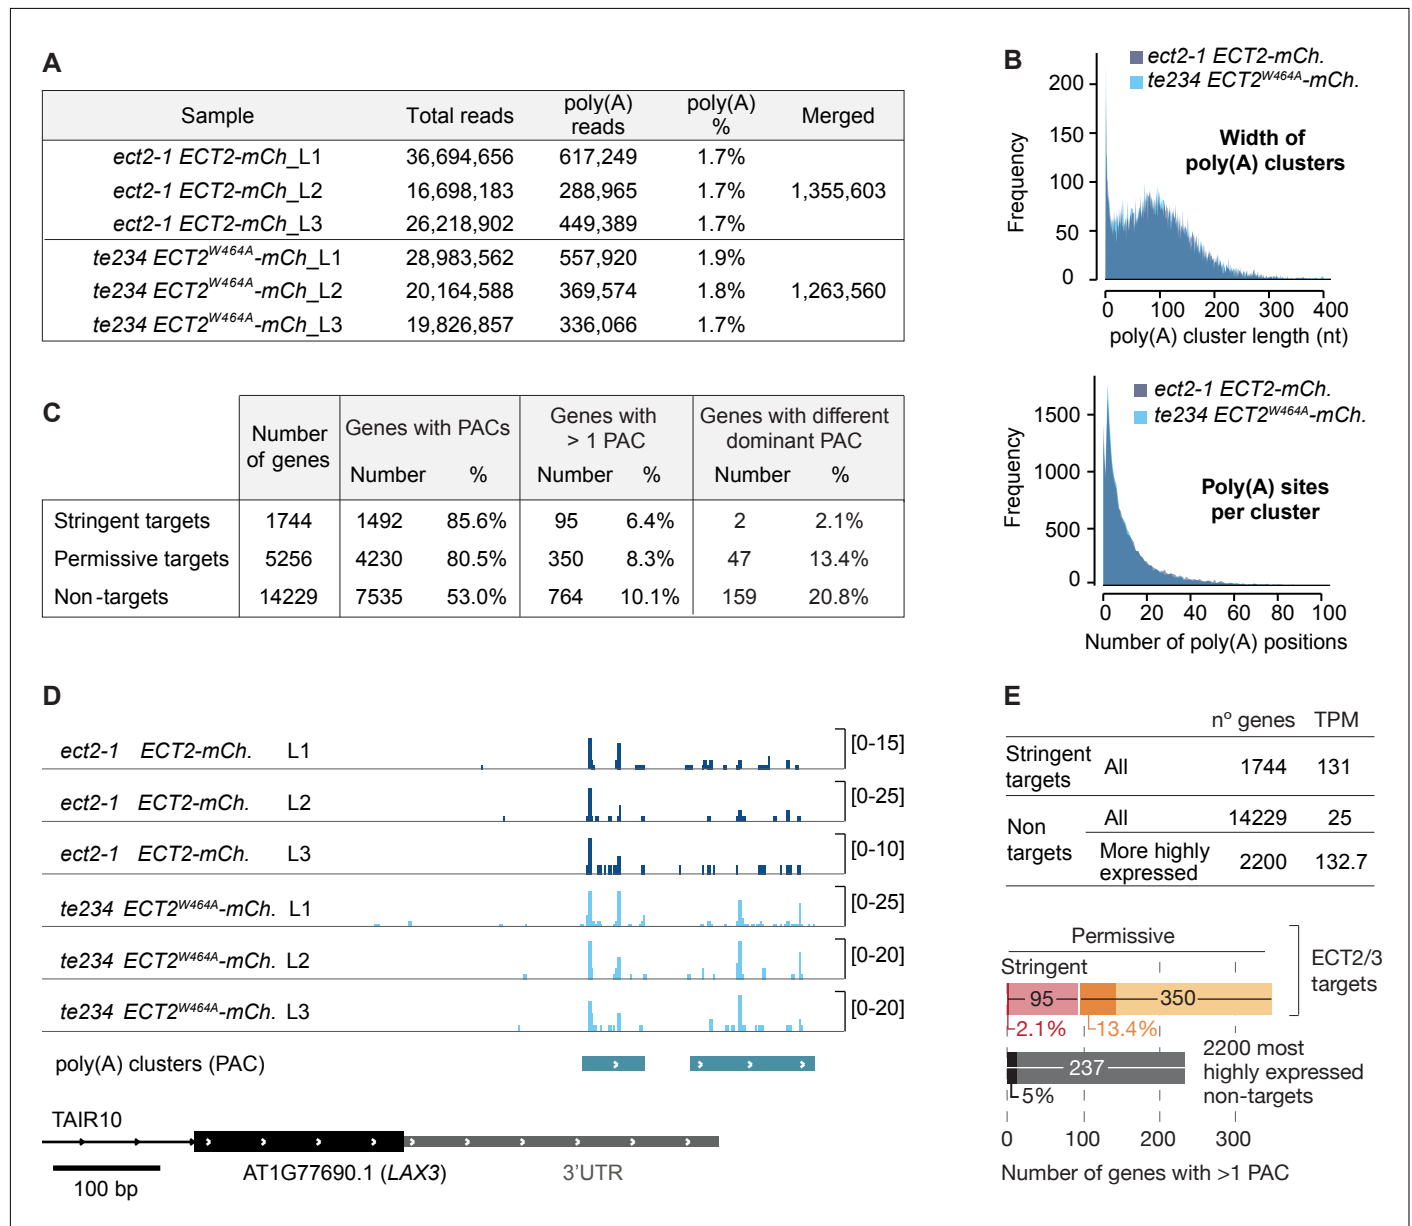

**Figure 5—figure supplement 2. Poly(A) sites do not change in ECT2/3 targets upon loss of ECT2/3/4 function (extended data).** (A) Summary of poly(A)-containing reads (i.e. reads with at least 9 untemplated As) after removal of reads mapping upstream of purine-rich sites. These reads were used for cluster identification, yielding 17,028 putative poly(A) site clusters (PACs), from which 14,667 were retained after further filtering of potential false positives (see Methods). (B) Features of PACs. (Upper panel) Genomic distance between most upstream and most downstream poly(A) site within each cluster (median length of 105 bp). (Lower panel) Total number of genomic positions within the cluster where at least 1 read with an untemplated poly(A) tail was detected (median of 12 poly(A) sites per cluster). (C) PACs sorted by ECT2/3 target status. Percentages of genes with more than 1 PAC refer to the number of genes with PACs. Percentages of genes with a dominant PAC (defined as the cluster with the most reads) that is different between *te234 ECT2<sup>W464A</sup>-mCherry* and *ect2-1 ECT2-mCh* samples refer to the number of genes with more than 1 PAC. (D) Variation in dominant polyadenylation sites for the non-ECT2/3-targeted transcript *LAX3*, an example of gene with different dominant PAC. Independently of the fact that the total amount of poly(A) reads is generally higher in *te234 ECT2<sup>W464A</sup>-mCherry* compared to *ect2-1 ECT2-mCh* samples (notice that the scales have been adjusted for optimal comparison of PAC usage within samples), the ratio between the number of reads in the upstream and the downstream clusters is different in the 2 genotypes. Transcript annotation is based on TAIR10. (E) Mean TPMs (Smart-seq2 data of sorted protoplasts, combining all 6 samples) of genes in the different ECT2/3 targets groups (upper panel). The significantly lower likelihood for ECT2/3 targets to have a different dominant PAC upon loss of ECT2/3/4 function depletion compared to non targets (Figure 5E) could be due to differences in transcript abundance between the target and non-target groups. Looking at only the 2200 most highly expressed non-target genes, only 5.5% of these genes have a different dominant PAC in *te234 ECT2<sup>W464A</sup>-mCherry* than *ect2-1 ECT2-mCh* samples (lower panel, dark shading refers to genes with different dominant PAC as in Figure 5E), significantly smaller than the percentage for all non-target genes (20.8%, Figure 5E) ( $p=3.2e-9$ , Fisher's exact test).
