# Supplementary material for: The YTHDF proteins ECT2 and ECT3 bind largely overlapping target sets and influence target mRNA abundance, not alternative polyadenylation
Source: eLife journal article supplement (doi:10.7554/elife.72377), 2021-09-30
Supplement: supp [file elife-72377-supp-v1.zip › elife_poa_e72377_Figure_6_figure_supplement_1.pdf]

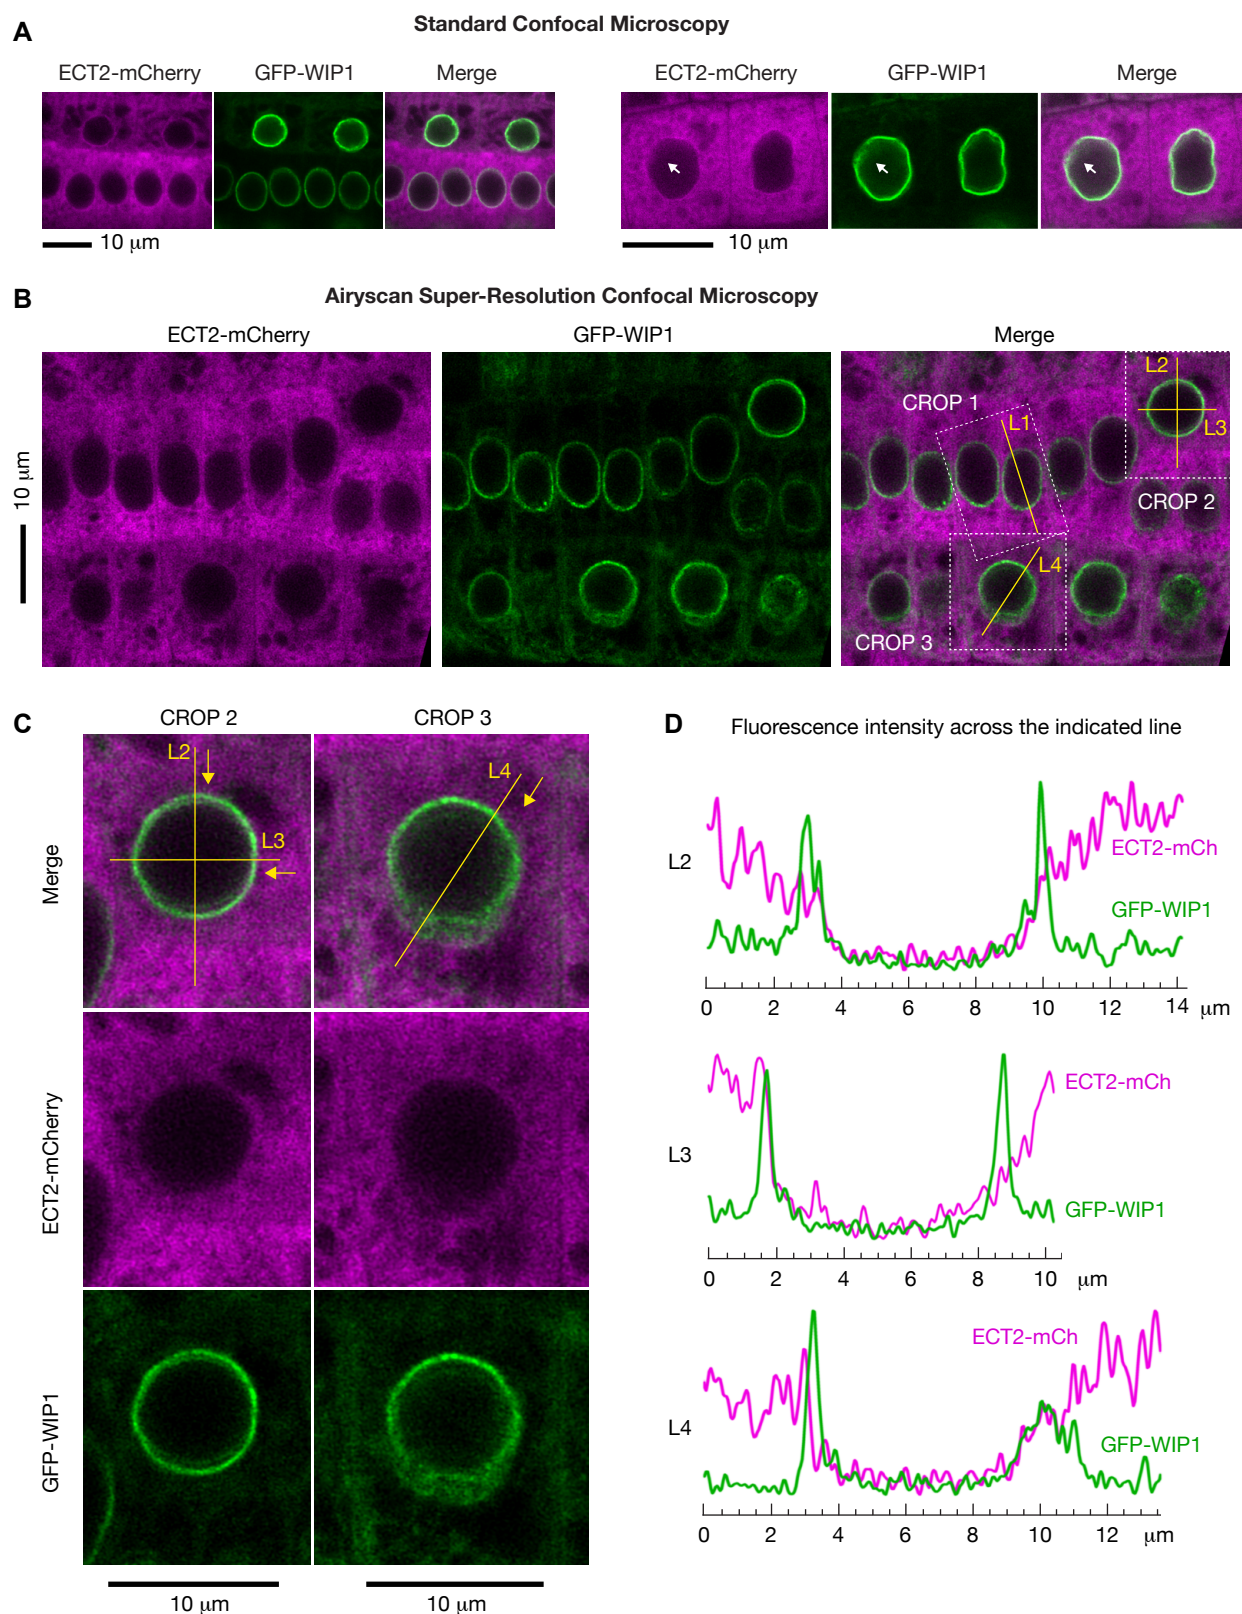

**Figure 6—figure supplement 1. Super-resolution confocal microscopy of cells co-expressing ECT2-mCherry and the nuclear envelope marker GFP-WIP1.** (A) Standard confocal microscopy of root cells co-expressing *ECT2-mCherry* and *GFP-WIP1* as in [Figure 6A](#). (B-D) Airyscan super-resolution confocal microscopy of root cells as in [A](#). White dashed outlines in (B) are magnified in (C) (crop 2 and 3), and mCherry/GFP fluorescence along the yellow lines (L2-4) is plotted in (D). Yellow arrows indicate the direction of the fluorescence plots from left to right. Magnification of crop 1 and fluorescence intensity along L1 is shown in [Figure 6B](#).
