# Supplementary material for: The YTHDF proteins ECT2 and ECT3 bind largely overlapping target sets and influence target mRNA abundance, not alternative polyadenylation
Source: eLife journal article supplement (doi:10.7554/elife.72377), 2021-09-30
Supplement: supp [file elife-72377-supp-v1.zip › elife_poa_e72377_Figure_7_figure_supplement_1.pdf]

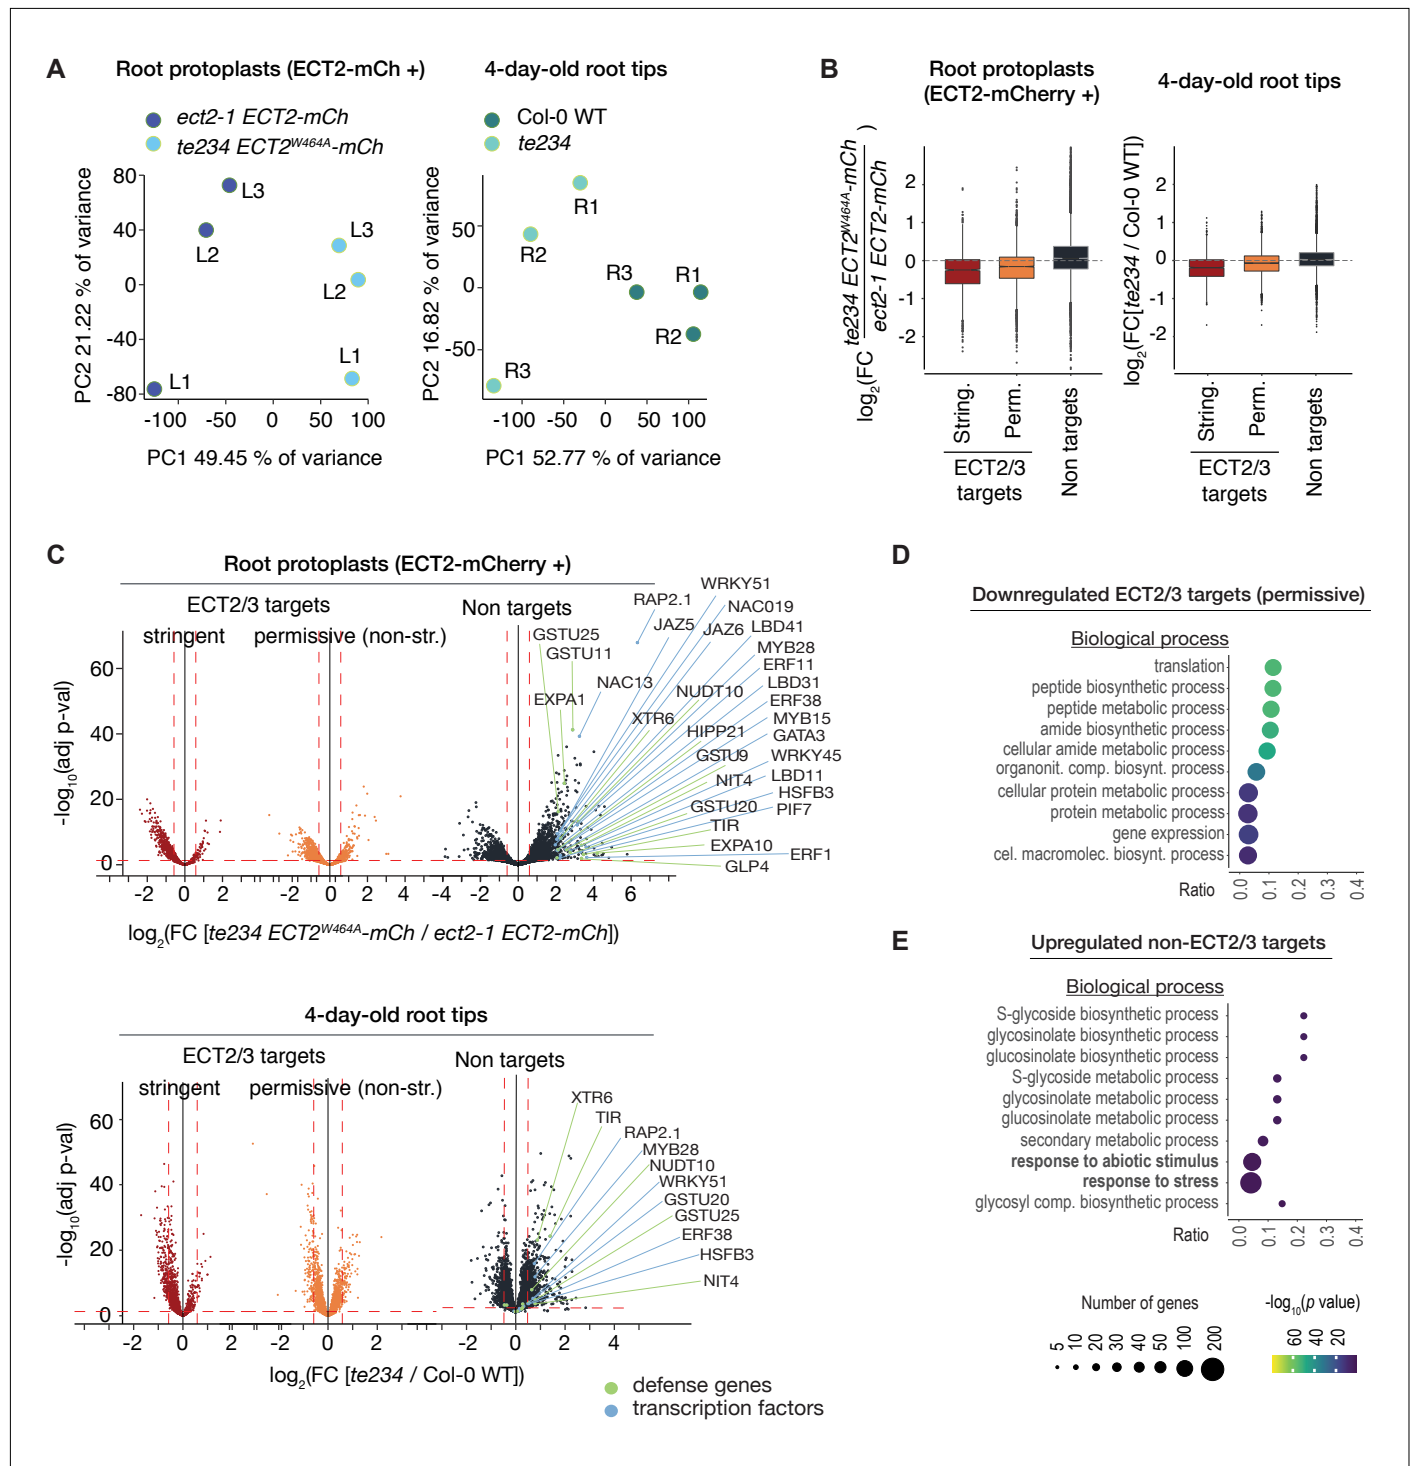

**Figure 7—figure supplement 1. ECT2/3 targets are generally less abundant in root tips of *ect2/ect3/ect4* knockout plants.** (A) Principal component analysis of transcriptome expression values (TPM) in Smart-seq2 libraries from FACS-sorted root protoplasts expressing *ECT2-mCherry* in *te234/ECT2<sup>W464A</sup>-mCherry* and *ect2-1/ECT2-mCh* 5-day-old seedlings (left panel), or in RNA-seq libraries obtained from root tips of *te234* and wild type 4-day-old seedlings (right panel). (B) Boxplots of  $\log_2$  fold change expression values between the genotype-pairs described in A. (C) Volcano plots showing genes differentially expressed between the genotype-pairs described in A. Upregulated non-ECT2/3 targeted transcription factors and stress-responsive genes are marked. (D,E) List with the 10 most significantly enriched GO terms among significantly upregulated ECT2/3 targets (permissive set) (D), or downregulated non-targets (E) in root tips of *ect2/3/4* knockout plants (*te234*) compared to wild type.
