# Supplementary material for: The YTHDF proteins ECT2 and ECT3 bind largely overlapping target sets and influence target mRNA abundance, not alternative polyadenylation
Source: eLife journal article supplement (doi:10.7554/elife.72377), 2021-09-30
Supplement: supp [file elife-72377-supp-v1.zip › elife_poa_e72377_Supplementary_file_1.xlsx]

## Sheet: Info
Supplementary File 1
ECT3 HyperTRIBE data from manually dissected root tips and apexes (aerial tissue) of 10-day-old seedlings grown on vertical plates in long days
Sheet type	Description
HITS	All significantly edited sites (padj<0.01, log2FoldChange(ECT3-ADAR/ADAR)>1) constrained to A->G (+strand) or T->C (-strand) mismatches, and with at least 10 reads covering the edited site over the 5 fusion samples
GENES	All genes containing significantly edited sites as described above
HITS
Column headers	Description
ID	Chromosome position of each edited site
GENE	AGI (Araport11)
TRANSCRIPTS	Ordered by expression
NAME	Gene name
STRAND	DNA strand, based on annotated gene with highest expression in case of ambiguity (see Note 1 below)
REF	Reference nucleotide (un-fused ADAR control samples)
TARG	Mismatched nucleotide (ECT3-ADAR fusion samples)
PROP	Editing proportion based on raw reads
COUNT	Raw number of reads covering the position with edited nucleotides (see Note 2 below)
log2FC	Modelled fold change (ECT3-ADAR vs. ADAR control) in editing
p-adj	Adjusted p-value from the model
GENES
Column headers	Description
GENE	AGI (Araport11)
NAME	Gene name
STRAND	DNA strand, based on annotated gene with highest expression in case of ambiguity (see Note 1 below)
TRANSCRIPTS	Ordered by expression
TPM	Expression estimates for each transcript (in the same order as in the preceding TRANSCRIPTS column) in transcripts per million, according to Salmon quantification, averaged over the 5 control samples (free ADAR) in either roots or aerial tissues
HITS	Number of positions (edited sites) per gene
IDs	Chromosome positions of edited sites
PROP	Editing proportions based on raw reads
log2FC	Modelled log2 fold change (ECT3-ADAR vs. ADAR control) in editing. Individual positions were filtered s.t. log2FC>1 +ve fold change implies the edit is preferential to the ECT3-ADAR fusion (desired outcome) -ve fold change implies that the edit is preferential to the control (free ADAR)
p-adj	False Discovery Rate (ordered by lowest to highest, within and across genes)
MISMATCH_TYPE	Restricted to A->G (+ve strand) and T->C (-ve strand)
Additional notes:
1. The RNA-seq data is unstranded and the results are stranded by annotation. This means that an A-G edit on a -ve strand transcript appears as a T-C mismatch. Thus, when interpreting edits one should also check the annotated strand.
2. To be modelled there was a requirement of at least 2 tags in 4 of the 5 replicates associated with the putative edit base at that position.
3. If the editing proportion was exactly 1, the position was filtered out, otherwise NO post-filtering has been done for putative SNPs.
4. The method is for all intents and purposes REFERENCE GENOME (TAIR10) - FREE, in that the reference genome is NOT used to decide something is an A-G or T-C edit (or any other edit type). This means that a SNP presence in BOTH the control and treatment sets should produce a genuine result. The issue is when there is a SNP ONLY present in ONE of the control OR the treatment sets (and at multiple …
5. The reference genome is only used for mapping and generating the base pileups.

## Sheet: HITS_ECT3-HT_roots
ID	GENE	TRANSCRIPTS	NAME	STRAND	REF	TARG	PROP	COUNT	log2FC	p-adj
2_15350547	AT2G36620	AT2G36620.1	RPL24A	-	T	C	0.533393	2396	6.10702	0
3_19506684	AT3G52590	AT3G52590.1	RPL40B	+	A	G	0.318861	4054	7.21718	0
5_1028504	AT5G03850	AT5G03850.1	RPS28A	-	T	C	0.308239	3165	6.10315	0
2_7548140	AT2G17360	AT2G17360.1,AT2G17360.2	RPS4A	+	A	G	0.391529	2727	6.5984	0
4_8242712	AT4G14320	AT4G14320.1	RPL36AB	-	T	C	0.208981	1964	8.08929	2.43952e-293
4_9280509	AT4G16450	AT4G16450.1,AT4G16450.2	AT4G16450	+	A	G	0.247295	1920	5.91588	5.18648e-268
1_3107611	AT1G09590	AT1G09590.1	RPL21A	+	A	G	0.269864	1885	8.85054	2.14445e-259
5_25393550	AT5G63400	AT5G63400.1	ADK1	-	T	C	0.252191	2906	3.62428	3.5537e-259
1_29725126	AT1G79010	AT1G79010.1	AT1G79010	-	T	C	0.51289	1890	4.53813	3.25613e-251
3_21995863	AT3G59540	AT3G59540.1	RPL38B	-	T	C	0.378593	4149	7.14671	5.00838e-239
1_29746683	AT1G79075	AT1G79075.1,AT1G79075.2	AT1G79075	+	A	G	0.521338	1637	10.5669	4.36799e-232
4_16339804	AT4G34110	AT4G34110.1	PAB2	+	A	G	0.284205	1506	5.11968	8.20549e-231
3_21995848	AT3G59540	AT3G59540.1	RPL38B	-	T	C	0.286592	2798	8.54769	1.01259e-230
1_28528362	AT1G76010	AT1G76010.1,AT1G76010.2	AT1G76010	-	T	C	0.304658	811	5.20587	8.60332e-228
4_16558578	AT4G34700	AT4G34700.1	CIB22	+	A	G	0.131013	1487	10.1801	6.34511e-222
1_18218095	AT1G49240	AT1G49240.1	ACT8	+	A	G	0.205211	1205	6.84342	1.0733e-219
4_10035807	AT4G18100	AT4G18100.1	RPL32A	-	T	C	0.154325	3026	5.13047	6.46804e-215
1_4889196	AT1G14320	AT1G14320.1,AT1G14320.2	RPL10A	+	A	G	0.293939	6499	5.14633	4.69778e-214
4_18258389	AT4G39200	AT4G39200.1,AT4G39200.2	RPS25E	+	A	G	0.0869188	1705	6.95612	1.84925e-209
5_16676103	AT5G41700	AT5G41700.1,AT5G41700.3,AT5G41700.4	UBC8	+	A	G	0.1005	1005	4.54031	2.48487e-208
3_19660777	AT3G53020	AT3G53020.1	RPL24B	-	T	C	0.157878	1449	6.55473	5.76929e-198
4_16558613	AT4G34700	AT4G34700.1	CIB22	+	A	G	0.641859	6477	5.28882	8.403e-197
4_11266724	AT4G21105	AT4G21105.1,AT4G21105.3	AT4G21105	+	A	G	0.0835263	1371	10.0077	1.7359e-195
4_11266690	AT4G21105	AT4G21105.1,AT4G21105.3	AT4G21105	+	A	G	0.128978	2529	8.14146	3.01592e-195
5_13711736	AT5G35530	AT5G35530.1	RPS3C	-	T	C	0.246247	2001	3.96337	9.19449e-195
2_133050	AT2G01250	AT2G01250.1,AT2G01250.2	RPL7B	-	T	C	0.155436	1827	5.93413	1.7607e-194
5_5094143	AT5G15650	AT5G15650.1	RGP2	+	A	G	0.255536	1581	5.08554	5.7958e-194
5_3259237	AT5G10360	AT5G10360.1,AT5G10360.2	RPS6B	-	T	C	0.0723831	1392	4.1128	1.64403e-192
2_7547873	AT2G17360	AT2G17360.1,AT2G17360.2	RPS4A	+	A	G	0.193434	1744	4.54151	1.20251e-191
3_368581	AT3G02090	AT3G02090.1,AT3G02090.2	MPPBETA	+	A	G	0.241532	1419	5.81563	1.02452e-190
2_18249222	AT2G44120	AT2G44120.2,AT2G44120.1	RPL7C	-	T	C	0.166822	895	8.85677	5.70899e-190
4_16558627	AT4G34700	AT4G34700.1	CIB22	+	A	G	0.295643	2667	8.79735	3.66915e-189
5_13711696	AT5G35530	AT5G35530.1	RPS3C	-	T	C	0.143769	1216	6.11908	1.34301e-188
5_9837104	AT5G27770	AT5G27770.1	RPL22C	+	A	G	0.146027	1020	8.76084	2.97712e-187
2_8514247	AT2G19740	AT2G19740.1	RPL31A	+	A	G	0.327623	1683	4.94171	2.74562e-183
4_13554794	AT4G27000	AT4G27000.1	RBP45C	-	T	C	0.384502	521	6.94042	3.52814e-183
1_25262349	AT1G67430	AT1G67430.1,AT1G67430.2	RPL17B	+	A	G	0.182958	2467	4.17198	4.9939e-182
3_17088000	AT3G46430	AT3G46430.1	AT3G46430	+	A	G	0.278773	2444	5.85457	8.85155e-182
4_6174588	AT4G09800	AT4G09800.1	RPS18A	+	A	G	0.0767212	994	6.1314	2.47324e-177
3_2605803	AT3G08580	AT3G08580.1,AT3G08580.2	AAC1	-	T	C	0.0920338	2068	5.2929	1.30219e-174
2_9237400	AT2G21580	AT2G21580.1,AT2G21580.2	RPS25B	+	A	G	0.242562	3522	3.37721	2.15081e-173
4_479576	AT4G01100	AT4G01100.1,AT4G01100.2,AT4G01100.3	ADNT1	+	A	G	0.151575	1073	5.28669	5.40422e-173
1_10831884	AT1G30580	AT1G30580.1	AT1G30580	-	T	C	0.505656	1475	5.64712	1.33037e-172
4_251155	AT4G00585	AT4G00585.1	AT4G00585	-	T	C	0.39112	1656	4.92387	6.86172e-172
1_26621164	AT1G70600	AT1G70600.1	RPL27AC	-	T	C	0.202937	1548	5.45279	4.45688e-170
3_2917635	AT3G09500	AT3G09500.1	RPL35A	+	A	G	0.0656289	1893	5.15669	1.28261e-169
5_24290568	AT5G60390	AT5G60390.1,AT5G60390.2,AT5G60390.3	A3	+	A	G	0.122695	3374	4.2959	1.82063e-169
5_19292839	AT5G47570	AT5G47570.1	AT5G47570	-	T	C	0.229532	1399	7.22216	3.9488e-169
1_15651764	AT1G41880	AT1G41880.1,AT1G41880.2	RPL35AB	-	T	C	0.208257	2048	3.83518	8.92785e-169
4_10035806	AT4G18100	AT4G18100.1	RPL32A	-	T	C	0.07737	1478	7.53341	1.257e-168
3_2616488	AT3G08610	AT3G08610.1	AT3G08610	-	T	C	0.225884	3187	5.58344	1.12395e-167
1_23835258	AT1G64230	AT1G64230.1,AT1G64230.4,AT1G64230.3	UBC28	+	A	G	0.266652	1217	3.57243	4.31493e-164
3_10154258	AT3G27430	AT3G27430.2,AT3G27430.3,AT3G27430.1	PBB1	+	A	G	0.26526	1169	4.38467	4.47219e-164
4_13594483	AT4G27090	AT4G27090.1	RPL14B	-	T	C	0.134111	4773	4.06104	3.59591e-161
4_13594277	AT4G27090	AT4G27090.1	RPL14B	-	T	C	0.0547796	1106	6.52302	1.30401e-160
1_24249079	AT1G65290	AT1G65290.1	MTACP2	-	T	C	0.297329	2827	5.53161	1.53927e-160
5_9874148	AT5G27850	AT5G27850.1,AT5G27850.2	RPL18C	+	A	G	0.0992093	2108	6.20101	2.62189e-160
2_8512412	AT2G19730	AT2G19730.1,AT2G19730.2,AT2G19730.3	RPL28A	+	A	G	0.0619019	1326	5.0156	3.49667e-159
3_19627227	AT3G52930	AT3G52930.1	AT3G52930	-	T	C	0.0924182	579	7.29805	4.39526e-159
4_10302356	AT4G18730	AT4G18730.1	RPL11B	+	A	G	0.109161	1437	4.86295	2.64424e-158
1_10640526	AT1G30230	AT1G30230.1,AT1G30230.2	AT1G30230	+	A	G	0.134599	1390	7.06452	8.85658e-158
2_19003663	AT2G46280	AT2G46280.1,AT2G46280.3	TIF3I1	-	T	C	0.247446	775	5.95244	9.67224e-158
4_15470365	AT4G31985	AT4G31985.1	RPL39C	+	A	G	0.123013	1385	8.50255	1.60976e-157
4_15470373	AT4G31985	AT4G31985.1	RPL39C	+	A	G	0.124756	1342	7.02547	1.90537e-157
1_4889452	AT1G14320	AT1G14320.1,AT1G14320.2	RPL10A	+	A	G	0.0449728	611	7.71178	4.13247e-157
1_21356131	AT1G57660	AT1G57660.1	RPL21F	+	A	G	0.0550776	877	7.03313	6.19828e-157
1_4888784	AT1G14320	AT1G14320.1	RPL10A	+	A	G	0.0874716	2082	2.97846	1.55765e-156
5_6851884	AT5G20290	AT5G20290.1	RPS8A	-	T	C	0.0639011	1468	5.11036	3.129e-156
4_11266414	AT4G21105	AT4G21105.1,AT4G21105.3	AT4G21105	+	A	G	0.0982188	1930	5.8041	4.95813e-156
1_2457149	AT1G07920	AT1G07920.1	A3	+	A	G	0.174887	1046	5.46658	5.69239e-156
4_7864558	AT4G13520	AT4G13520.1,AT4G13520.2	SMAP1	+	A	G	0.106339	827	6.28247	6.61741e-155
5_6581988	AT5G19510	AT5G19510.1	AT5G19510	-	T	C	0.140885	2347	4.23097	8.18643e-155
3_1621873	AT3G05590	AT3G05590.1,AT3G05590.2	RPL18B	+	A	G	0.173614	4765	2.87068	4.95438e-152
5_24290581	AT5G60390	AT5G60390.1,AT5G60390.2,AT5G60390.3	A3	+	A	G	0.0249339	679	5.75127	1.02496e-150
3_19506699	AT3G52590	AT3G52590.1	RPL40B	+	A	G	0.116718	1219	7.85997	1.30593e-149
3_21196831	AT3G57290	AT3G57290.1	EIF3E	-	T	C	0.28465	1070	4.95062	6.77896e-147
1_16268267	AT1G43170	AT1G43170.1,AT1G43170.4	ARP1	+	A	G	0.0614465	1141	4.41987	6.97446e-145
2_674549	AT2G02510	AT2G02510.1	AT2G02510	+	A	G	0.204572	877	18.3362	2.67316e-144
1_18285746	AT1G49410	AT1G49410.1	TOM6	-	T	C	0.159917	1153	7.26852	3.04844e-144
5_4889648	AT5G15090	AT5G15090.1,AT5G15090.2	VDAC3	-	T	C	0.168092	806	8.48385	6.62943e-144
4_13944185	AT4G28060	AT4G28060.1	COX6B-3	-	T	C	0.314596	3162	5.27067	1.52889e-143
5_3791311	AT5G11770	AT5G11770.1	AT5G11770	-	T	C	0.177694	2127	4.23199	1.77547e-143
3_15800146	AT3G44010	AT3G44010.1,AT3G44010.2	RPS29A	-	T	C	0.136349	1736	6.80867	2.86864e-143
5_15854152	AT5G39600	AT5G39600.1	AT5G39600	-	T	C	0.378428	414	7.77173	9.38135e-142
2_7642478	AT2G17560	AT2G17560.1,AT2G17560.3	HMGB4	-	T	C	0.346567	1065	6.63998	6.25548e-140
4_18072254	AT4G38680	AT4G38680.1	CSP2	-	T	C	0.058554	805	7.09744	1.00208e-139
1_1141982	AT1G04270	AT1G04270.1,AT1G04270.2	RPS15A	-	T	C	0.110224	1795	4.92712	1.91501e-139
4_9714517	AT4G17390	AT4G17390.1	RPL15B	-	T	C	0.0339979	486	8.05948	9.69909e-139
3_2523441	AT3G07910	AT3G07910.1	AT3G07910	-	T	C	0.265293	1249	5.0939	2.04716e-138
2_17625649	AT2G42310	AT2G42310.1	AT2G42310	+	A	G	0.171057	935	6.38935	2.83779e-138
1_27850034	AT1G74060	AT1G74060.1	RPL6B	-	T	C	0.129941	687	7.72816	3.53692e-138
2_8965049	AT2G20820	AT2G20820.1,AT2G20820.2	AT2G20820	+	A	G	0.144176	1812	5.21445	4.22645e-138
3_1009679	AT3G03920	AT3G03920.1	AT3G03920	-	T	C	0.207557	3076	2.94236	6.59511e-138
3_2615637	AT3G08610	AT3G08610.1	AT3G08610	-	T	C	0.306801	2567	6.11087	2.58052e-137
2_16475984	AT2G39460	AT2G39460.1,AT2G39460.2	RPL23AA	+	A	G	0.100609	496	8.1685	6.41975e-137
1_3917952	AT1G11650	AT1G11650.2,AT1G11650.1	RBP45B	+	A	G	0.147818	630	8.31574	1.95623e-136
3_21196868	AT3G57290	AT3G57290.1	EIF3E	-	T	C	0.248112	854	8.42504	2.78762e-136
1_6153155	AT1G17880	AT1G17880.1	BTF3	-	T	C	0.111253	1221	4.6	3.87108e-136
5_5939085	AT5G17920	AT5G17920.1,AT5G17920.2	MS1	+	A	G	0.0846126	1389	3.25115	4.83226e-136
2_133313	AT2G01250	AT2G01250.1,AT2G01250.2	RPL7B	-	T	C	0.0761142	1122	5.97614	1.14465e-135
5_23719508	AT5G58710	AT5G58710.1	CYP20-1	+	A	G	0.161133	529	8.15852	1.68993e-135
5_9873525	AT5G27850	AT5G27850.1,AT5G27850.2	RPL18C	+	A	G	0.115698	2385	3.4157	4.50047e-134
4_9401012	AT4G16720	AT4G16720.1	RPL15A	-	T	C	0.0653442	1983	3.67778	2.65475e-133
5_9874290	AT5G27850	AT5G27850.1,AT5G27850.2	RPL18C	+	A	G	0.0765619	799	6.82757	2.78421e-133
5_1389547	AT5G04800	AT5G04800.1,AT5G04800.2,AT5G04800.3,AT5G04800.4	RPS17D	+	A	G	0.150178	1140	5.79375	2.89524e-133
1_27109424	AT1G72020	AT1G72020.1	AT1G72020	-	T	C	0.164561	1120	7.19546	4.95907e-133
4_6174628	AT4G09800	AT4G09800.1	RPS18A	+	A	G	0.0543194	664	8.10628	1.47952e-132
5_5865440	AT5G17770	AT5G17770.1	CBR1	-	T	C	0.0813513	537	5.03502	3.18744e-132
3_22138039	AT3G59920	AT3G59920.1	GDI2	+	A	G	0.11956	478	9.16665	2.70886e-131
5_19951470	AT5G49210	AT5G49210.1,AT5G49210.3	AT5G49210	+	A	G	0.501631	615	4.27119	4.89264e-131
5_3258877	AT5G10360	AT5G10360.1,AT5G10360.2	RPS6B	-	T	C	0.0433419	525	7.4723	1.18735e-129
3_4433891	AT3G13580	AT3G13580.1,AT3G13580.2,AT3G13580.3,AT3G13580.4,AT3G13580.5,AT3G13580.6,AT3G13580.7,AT3G13580.8,AT3G13580.9	RPL7D	+	A	G	0.182734	1251	6.40745	2.42473e-129
4_13944332	AT4G28060	AT4G28060.1	COX6B-3	-	T	C	0.22357	2783	3.92859	1.18948e-128
3_20699520	AT3G55750	AT3G55750.1	RPL35AD	+	A	G	0.0540674	547	9.12063	1.53431e-128
2_18046779	AT2G43460	AT2G43460.1	RPL38B	-	T	C	0.0800195	1638	5.74422	4.71263e-128
5_8008692	AT5G23740	AT5G23740.1	RPS11C	-	T	C	0.126653	2155	4.15107	1.90045e-127
5_25735287	AT5G64350	AT5G64350.1	FKBP12	-	T	C	0.0830207	2678	4.67384	3.02979e-127
2_15670623	AT2G37340	AT2G37340.1,AT2G37340.2,AT2G37340.3	RS2Z33	-	T	C	0.365558	1176	5.25233	6.50305e-127
1_9315599	AT1G26880	AT1G26880.1,AT1G26880.2	RPL34A	-	T	C	0.286188	1467	8.26745	7.08137e-127
1_6377449	AT1G18540	AT1G18540.1	RPL6A	-	T	C	0.117263	485	5.279	1.25395e-126
4_16558584	AT4G34700	AT4G34700.1	CIB22	+	A	G	0.149583	1703	8.11394	1.38331e-126
1_21073182	AT1G56280	AT1G56280.1,AT1G56280.2	ATDI19	-	T	C	0.160901	1558	4.35616	2.85199e-126
5_24016177	AT5G59613	AT5G59613.2,AT5G59613.1	AT5G59613	-	T	C	0.141217	3702	4.77253	8.08401e-126
2_674529	AT2G02510	AT2G02510.1	AT2G02510	+	A	G	0.088714	496	8.00943	2.83886e-125
5_533518	AT5G02450	AT5G02450.1	RPL36C	+	A	G	0.0727333	657	6.13878	2.12589e-124
2_7547281	AT2G17360	AT2G17360.1,AT2G17360.2	RPS4A	+	A	G	0.13262	1723	3.26196	4.32894e-122
4_1075175	AT4G02450	AT4G02450.1,AT4G02450.2	AT4G02450	-	T	C	0.104942	928	4.75028	9.7215e-122
4_18257855	AT4G39200	AT4G39200.1,AT4G39200.2	RPS25E	+	A	G	0.0435317	1380	5.9084	1.55752e-121
3_20699518	AT3G55750	AT3G55750.1	RPL35AD	+	A	G	0.117099	1106	8.11652	5.37584e-120
3_1009725	AT3G03920	AT3G03920.1	AT3G03920	-	T	C	0.0402895	618	6.87578	6.44112e-120
5_6803985	AT5G20160	AT5G20160.1,AT5G20160.2	AT5G20160	-	T	C	0.188223	374	7.95657	2.54636e-119
3_21995906	AT3G59540	AT3G59540.1	RPL38B	-	T	C	0.113648	1593	7.20844	1.22997e-118
2_17460819	AT2G41840	AT2G41840.1	RPS2C	-	T	C	0.0340176	638	5.62271	5.36829e-118
5_24015658	AT5G59613	AT5G59613.2,AT5G59613.1	AT5G59613	-	T	C	0.564882	10243	3.00473	6.34439e-118
3_3624202	AT3G11510	AT3G11510.1	RPS14B	-	T	C	0.2397	3351	2.63592	1.17533e-117
2_15670558	AT2G37340	AT2G37340.1,AT2G37340.2,AT2G37340.3	RS2Z33	-	T	C	0.395368	973	6.44395	1.54985e-117
1_29746676	AT1G79075	AT1G79075.1,AT1G79075.2	AT1G79075	+	A	G	0.27132	789	18.1409	3.4265e-117
1_27540343	AT1G73230	AT1G73230.1	AT1G73230	-	T	C	0.318741	699	4.88791	3.51318e-117
4_11266799	AT4G21105	AT4G21105.1,AT4G21105.3	AT4G21105	+	A	G	0.111769	1076	8.08719	7.95131e-117
1_3513734	AT1G10630	AT1G10630.1,AT1G10630.2	ATARFA1F	-	T	C	0.0616923	549	6.86298	8.15259e-117
1_10640279	AT1G30230	AT1G30230.1,AT1G30230.2	AT1G30230	+	A	G	0.11521	1449	4.06639	1.48933e-116
5_6851966	AT5G20290	AT5G20290.1	RPS8A	-	T	C	0.0236773	631	4.85516	2.55978e-116
4_16558591	AT4G34700	AT4G34700.1	CIB22	+	A	G	0.133094	1443	8.80216	3.34109e-116
1_24560692	AT1G65980	AT1G65980.1,AT1G65980.2	PRXIIB	-	T	C	0.0825911	1632	5.56604	5.92229e-116
3_4433893	AT3G13580	AT3G13580.1,AT3G13580.2,AT3G13580.3,AT3G13580.4,AT3G13580.5,AT3G13580.6,AT3G13580.7,AT3G13580.8,AT3G13580.9	RPL7D	+	A	G	0.156395	1114	18.5175	2.24739e-115
5_6581936	AT5G19510	AT5G19510.1	AT5G19510	-	T	C	0.0903868	1353	3.52375	6.6576e-115
2_19345038	AT2G47110	AT2G47110.1,AT2G47110.2	RPS27AB	+	A	G	0.0449509	710	4.80162	3.56024e-114
3_17454033	AT3G47370	AT3G47370.1,AT3G47370.2,AT3G47370.3	RPS20B	-	T	C	0.0562889	759	4.62401	4.12725e-114
1_27540795	AT1G73230	AT1G73230.1	AT1G73230	-	T	C	0.0769667	814	5.18067	6.716e-114
1_21031095	AT1G56200	AT1G56200.1,AT1G56200.2	emb1303	+	A	G	0.305857	1718	3.9837	1.71164e-113
2_7566235	AT2G17420	AT2G17420.1,AT2G17420.2	NTRA	+	A	G	0.0684566	487	7.976	2.32906e-113
2_8512995	AT2G19730	AT2G19730.1,AT2G19730.2,AT2G19730.3	RPL28A	+	A	G	0.0669421	632	7.3311	3.25747e-113
3_1331183	AT3G04840	AT3G04840.1	RPS3AA	+	A	G	0.0954321	1429	5.58807	1.46967e-112
5_19169218	AT5G47210	AT5G47210.1,AT5G47210.2,AT5G47210.3	AT5G47210	-	T	C	0.102559	565	7.34372	1.64332e-112
1_29304279	AT1G77940	AT1G77940.1	RPL30B	-	T	C	0.0410354	688	9.05286	3.66013e-112
4_18257627	AT4G39200	AT4G39200.1,AT4G39200.2	RPS25E	+	A	G	0.0557733	1480	5.04167	6.03973e-112
2_18046284	AT2G43460	AT2G43460.1	RPL38B	-	T	C	0.0463402	792	7.89249	1.61025e-111
5_9278113	AT5G26667	AT5G26667.2,AT5G26667.3,AT5G26667.4	UMK3	+	A	G	0.186461	920	5.68684	1.61025e-111
5_3923142	AT5G12140	AT5G12140.1	CYS1	-	T	C	0.303075	1833	4.56499	6.60994e-111
3_17450346	AT3G47350	AT3G47350.1	HSD2	+	A	G	0.21861	538	4.41203	8.30169e-111
3_18334337	AT3G49430	AT3G49430.1,AT3G49430.2	SR34A	+	A	G	0.250983	638	4.36254	6.47138e-110
4_10303207	AT4G18730	AT4G18730.1	RPL11B	+	A	G	0.184639	851	7.39765	8.39601e-110
3_4592551	AT3G13920	AT3G13920.5,AT3G13920.1,AT3G13920.3,AT3G13920.2	TIF4A-1	-	T	C	0.0678441	557	6.24954	8.70977e-110
3_20790848	AT3G56020	AT3G56020.1	RPL41E	-	T	C	0.074309	621	19.8119	9.70707e-110
1_6214379	AT1G18070	AT1G18070.1,AT1G18070.3	AT1G18070	-	T	C	0.198864	385	6.02659	2.5803e-109
3_2917835	AT3G09500	AT3G09500.1	RPL35A	+	A	G	0.0804131	1207	4.82164	6.10793e-109
4_9714414	AT4G17390	AT4G17390.1	RPL15B	-	T	C	0.0992312	697	9.10956	6.59482e-109
4_15789218	AT4G32720	AT4G32720.1,AT4G32720.2	LA1	+	A	G	0.161005	583	4.37975	1.23659e-108
2_15169879	AT2G36160	AT2G36160.1	RPS14A	+	A	G	0.186936	850	3.92876	1.90277e-108
4_1073996	AT4G02450	AT4G02450.1,AT4G02450.2	AT4G02450	-	T	C	0.0471072	447	6.35986	9.43022e-108
4_16339569	AT4G34110	AT4G34110.1	PAB2	+	A	G	0.29812	3330	2.4307	1.50672e-107
2_9945547	AT2G23350	AT2G23350.1	PAB4	+	A	G	0.138082	504	7.86834	4.84918e-107
1_15651620	AT1G41880	AT1G41880.1,AT1G41880.2	RPL35AB	-	T	C	0.142735	1005	4.82585	6.14392e-107
4_18414907	AT4G39680	AT4G39680.1,AT4G39680.2	AT4G39680	-	T	C	0.376652	513	3.75348	9.65912e-107
5_6090321	AT5G18380	AT5G18380.1,AT5G18380.2	RPS16C	-	T	C	0.0418088	772	6.78006	4.82981e-106
3_2615640	AT3G08610	AT3G08610.1	AT3G08610	-	T	C	0.092215	796	6.98553	5.711e-106
5_3792530	AT5G11770	AT5G11770.1	AT5G11770	-	T	C	0.310907	2634	2.75883	1.35272e-105
3_20699374	AT3G55750	AT3G55750.1	RPL35AD	+	A	G	0.35571	4186	3.09219	1.466e-105
3_3623681	AT3G11510	AT3G11510.1	RPS14B	-	T	C	0.100273	662	7.28099	1.49246e-105
3_2252685	AT3G07110	AT3G07110.1,AT3G07110.2	RPL13AA	+	A	G	0.090121	1050	4.7131	3.27463e-105
2_19552022	AT2G47690	AT2G47690.1,AT2G47690.2,AT2G47690.3	AT2G47690	+	A	G	0.138579	1430	5.34334	1.51383e-104
4_13107990	AT4G25740	AT4G25740.1,AT4G25740.2	RPS10A	-	T	C	0.0716721	820	5.04451	2.58035e-104
5_26701926	AT5G66860	AT5G66860.1	AT5G66860	-	T	C	0.254987	588	4.4983	3.02414e-104
4_15208977	AT4G31340	AT4G31340.1,AT4G31340.2	AT4G31340	+	A	G	0.258778	936	5.66269	3.67175e-104
1_26190809	AT1G69620	AT1G69620.1	RPL34B	+	A	G	0.0344611	768	3.97745	6.53995e-104
1_12024490	AT1G33140	AT1G33140.1	RPL9B	+	A	G	0.0425928	686	7.82593	1.02117e-103
5_10070317	AT5G28060	AT5G28060.1	RPS24B	-	T	C	0.116687	1602	4.27266	1.02117e-103
2_16475904	AT2G39460	AT2G39460.1,AT2G39460.2	RPL23AA	+	A	G	0.086833	825	7.22004	1.07275e-103
1_28594513	AT1G76200	AT1G76200.1	AT1G76200	+	A	G	0.111153	1180	9.02011	9.21161e-103
5_16315460	AT5G40770	AT5G40770.1	PHB3	-	T	C	0.173747	499	6.4686	1.19149e-102
1_10993499	AT1G30880	AT1G30880.1,AT1G30880.2	AT1G30880	-	T	C	0.190033	1388	4.59431	1.50247e-102
3_2823365	AT3G09200	AT3G09200.1,AT3G09200.2	RPP0B	-	T	C	0.080704	752	7.27396	2.48238e-102
3_21196838	AT3G57290	AT3G57290.1	EIF3E	-	T	C	0.16288	638	6.48655	3.76755e-102
2_133081	AT2G01250	AT2G01250.1	RPL7B	-	T	C	0.032931	412	4.77835	4.44378e-102
5_22935404	AT5G56670	AT5G56670.1	RPS30C	-	T	C	0.120535	2011	3.90574	4.54258e-102
1_5166568	AT1G14980	AT1G14980.1,AT1G14980.2	CPN10	-	T	C	0.11309	1537	4.78105	6.47633e-102
3_1622049	AT3G05590	AT3G05590.1,AT3G05590.2	RPL18B	+	A	G	0.033477	1041	4.55881	1.49563e-101
2_16451050	AT2G39390	AT2G39390.1	RPL35B	-	T	C	0.0703414	1197	4.45063	1.67274e-101
4_6173816	AT4G09800	AT4G09800.1	RPS18A	+	A	G	0.106838	864	7.7941	1.73151e-101
5_6851714	AT5G20290	AT5G20290.1	RPS8A	-	T	C	0.0477473	833	5.29785	2.06374e-101
2_17625323	AT2G42310	AT2G42310.1	AT2G42310	+	A	G	0.0455293	443	6.31269	2.52956e-101
3_20556090	AT3G55440	AT3G55440.1	CTIMC	+	A	G	0.0877949	1466	4.87548	1.81119e-100
1_10639979	AT1G30230	AT1G30230.1,AT1G30230.2	AT1G30230	+	A	G	0.0338908	539	6.35384	1.8146e-100
2_16475987	AT2G39460	AT2G39460.1,AT2G39460.2	RPL23AA	+	A	G	0.0672389	329	8.63461	4.56274e-100
2_17460122	AT2G41840	AT2G41840.1	RPS2C	-	T	C	0.0744234	1452	3.77981	4.85806e-100
5_6090272	AT5G18380	AT5G18380.1	RPS16C	-	T	C	0.0424953	671	7.78515	7.09925e-100
3_1621826	AT3G05590	AT3G05590.1,AT3G05590.2	RPL18B	+	A	G	0.0605358	1071	3.31157	1.01709e-99
2_8843746	AT2G20530	AT2G20530.1,AT2G20530.2	PHB6	+	A	G	0.207116	390	7.77556	1.61094e-99
5_19552634	AT5G48230	AT5G48230.2,AT5G48230.1	AAT1	-	T	C	0.10682	343	6.67504	2.34091e-99
2_9237435	AT2G21580	AT2G21580.1,AT2G21580.2	RPS25B	+	A	G	0.0744606	842	5.62758	2.66632e-99
1_27799299	AT1G73940	AT1G73940.1	AT1G73940	-	T	C	0.179674	861	3.91934	3.66389e-99
3_23037596	AT3G62250	AT3G62250.1	RPS27AC	+	A	G	0.049439	564	6.68671	7.38906e-99
1_5472740	AT1G15930	AT1G15930.1,AT1G15930.2	RPS12A	+	A	G	0.0593003	600	8.91731	1.13991e-98
4_16339708	AT4G34110	AT4G34110.1	PAB2	+	A	G	0.0710601	675	6.39142	1.35814e-98
2_15670512	AT2G37340	AT2G37340.1,AT2G37340.2,AT2G37340.3	RS2Z33	-	T	C	0.38713	758	5.95982	1.36678e-98
5_2203878	AT5G07090	AT5G07090.1,AT5G07090.2	RPS4B	+	A	G	0.0802521	573	8.9028	4.14169e-98
5_22392829	AT5G55190	AT5G55190.1	RAN3	+	A	G	0.061866	616	4.58116	5.22773e-98
2_9944705	AT2G23350	AT2G23350.1	PAB4	+	A	G	0.171887	664	2.93505	5.6411e-98
1_2463255	AT1G07940	AT1G07940.1,AT1G07940.2,AT1G07940.3,AT1G07940.4	A3	-	T	C	0.0577367	425	6.63805	8.14057e-98
3_1168318	AT3G04400	AT3G04400.1,AT3G04400.2	RPL23C	+	A	G	0.0342075	557	8.81217	3.65196e-97
1_5495102	AT1G16000	AT1G16000.1	AT1G16000	+	A	G	0.0810621	461	6.64636	6.13234e-97
4_346444	AT4G00810	AT4G00810.1,AT4G00810.2	RPP1B	-	T	C	0.0389153	795	4.6706	1.15207e-96
1_8263206	AT1G23290	AT1G23290.1	RPL27AB	+	A	G	0.040351	768	4.34683	1.33016e-96
4_16338898	AT4G34110	AT4G34110.1	PAB2	+	A	G	0.0449676	382	5.19693	2.19538e-96
5_25394174	AT5G63400	AT5G63400.1,AT5G63400.2	ADK1	-	T	C	0.057379	708	6.02659	2.4379e-96
5_25749246	AT5G64400	AT5G64400.1,AT5G64400.2,AT5G64400.3	AT5G64400	+	A	G	0.0440297	611	5.97512	3.66144e-96
1_15651618	AT1G41880	AT1G41880.1,AT1G41880.2	RPL35AB	-	T	C	0.0555932	410	7.01268	4.56007e-96
3_5669687	AT3G16640	AT3G16640.1	TCTP	-	T	C	0.0508518	1391	2.83535	5.02983e-96
3_4362214	AT3G13410	AT3G13410.1	AT3G13410	-	T	C	0.089737	522	8.88288	9.88184e-96
3_19506553	AT3G52590	AT3G52590.1	RPL40B	+	A	G	0.0308263	632	7.72064	1.31449e-95
1_12024492	AT1G33140	AT1G33140.1	RPL9B	+	A	G	0.0365615	578	7.69898	2.30118e-95
5_6681799	AT5G19760	AT5G19760.1	DTC	-	T	C	0.102846	1630	2.71093	2.82771e-95
4_16039120	AT4G33250	AT4G33250.1	TIF3K1	-	T	C	0.168552	581	7.16827	7.85486e-95
5_6581909	AT5G19510	AT5G19510.1	AT5G19510	-	T	C	0.031441	432	8.71037	8.66206e-95
4_14473292	AT4G29430	AT4G29430.1	RPS15AE	+	A	G	0.254902	416	6.07368	9.29937e-95
5_6582198	AT5G19510	AT5G19510.1	AT5G19510	-	T	C	0.0467393	807	5.78218	1.55199e-94
5_3570544	AT5G11200	AT5G11200.1,AT5G11200.2,AT5G11200.3	RH15	+	A	G	0.271641	750	5.27541	1.84913e-94
1_7878975	AT1G22300	AT1G22300.1,AT1G22300.2,AT1G22300.3	GRF10	-	T	C	0.0926926	326	7.57945	2.79585e-94
4_14562907	AT4G29735	AT4G29735.1,AT4G29735.2	AT4G29735	-	T	C	0.205721	374	6.65127	3.03602e-94
1_2637660	AT1G08360	AT1G08360.1	RPL10AA	+	A	G	0.0895797	778	7.73396	3.94977e-94
1_23835329	AT1G64230	AT1G64230.1,AT1G64230.4,AT1G64230.3	UBC28	+	A	G	0.22357	645	19.4401	4.21159e-94
5_9873648	AT5G27850	AT5G27850.1,AT5G27850.2	RPL18C	+	A	G	0.0499332	1158	4.32693	8.19418e-94
1_24541861	AT1G65930	AT1G65930.1	CICDH	+	A	G	0.0648335	738	7.10601	1.38505e-93
5_9874300	AT5G27850	AT5G27850.1,AT5G27850.2	RPL18C	+	A	G	0.0588696	601	7.71498	2.3451e-93
1_9315592	AT1G26880	AT1G26880.1,AT1G26880.2	RPL34A	-	T	C	0.204949	1027	7.73587	2.37476e-93
1_2408763	AT1G07770	AT1G07770.1,AT1G07770.2,AT1G07770.3	RPS15AA	-	T	C	0.0744501	1232	5.29956	5.32565e-93
1_9206483	AT1G26630	AT1G26630.1,AT1G26630.2	ELF5A-2	+	A	G	0.0590877	1750	3.66398	1.08042e-92
3_10056052	AT3G27240	AT3G27240.1	CYC11	-	T	C	0.101219	407	18.1443	1.83278e-92
3_19506102	AT3G52590	AT3G52590.1	RPL40B	+	A	G	0.0239622	699	4.69088	2.50511e-92
4_13554788	AT4G27000	AT4G27000.1	RBP45C	-	T	C	0.367213	448	6.22618	5.19303e-92
1_5472184	AT1G15930	AT1G15930.1,AT1G15930.2	RPS12A	+	A	G	0.0455878	840	3.98069	8.38466e-92
1_29916247	AT1G79530	AT1G79530.1	GAPCP1	-	T	C	0.118875	820	6.61324	9.05558e-92
5_7939338	AT5G23540	AT5G23540.1,AT5G23540.2	RPN11	+	A	G	0.11037	364	5.6574	1.40852e-91
2_19531124	AT2G47610	AT2G47610.1	RPL7AA	+	A	G	0.0239936	360	5.92262	1.50762e-91
4_5924187	AT4G09320	AT4G09320.1	NDPK1	+	A	G	0.0339237	791	4.52238	1.80687e-91
4_6174644	AT4G09800	AT4G09800.1	RPS18A	+	A	G	0.0370158	452	6.21762	3.96473e-91
2_14531351	AT2G34470	AT2G34470.1,AT2G34470.2	UREG	-	T	C	0.164506	495	8.82977	6.31902e-91
1_9527888	AT1G27435	AT1G27435.1	AT1G27435	-	T	C	0.218497	567	5.83514	7.13925e-91
1_2408938	AT1G07770	AT1G07770.1,AT1G07770.2,AT1G07770.3	RPS15AA	-	T	C	0.10637	1927	3.7693	9.86715e-91
5_9873408	AT5G27850	AT5G27850.1,AT5G27850.2	RPL18C	+	A	G	0.044615	814	4.15516	1.09484e-90
3_19627637	AT3G52930	AT3G52930.1	AT3G52930	-	T	C	0.0130285	379	5.45995	1.34719e-90
5_13765403	AT5G35590	AT5G35590.1	PAA1	-	T	C	0.216725	806	8.89485	1.5175e-90
5_25548639	AT5G63840	AT5G63840.2,AT5G63840.1	PSL5	+	A	G	0.301185	559	3.66891	2.51247e-90
3_3624159	AT3G11510	AT3G11510.1	RPS14B	-	T	C	0.0790292	1195	5.25609	3.13142e-90
1_1216367	AT1G04480	AT1G04480.1	RPL23C	+	A	G	0.0388892	668	8.68853	4.52263e-90
3_23053061	AT3G62290	AT3G62290.1,AT3G62290.2,AT3G62290.3	ARFA1E	+	A	G	0.08316	2279	3.10636	6.92825e-90
2_17461425	AT2G41840	AT2G41840.1	RPS2C	-	T	C	0.0951726	623	4.79876	9.69001e-90
5_17461452	AT5G43460	AT5G43460.1,AT5G43460.2	AT5G43460	+	A	G	0.218157	644	6.30807	1.20617e-89
4_11266723	AT4G21105	AT4G21105.1,AT4G21105.3	AT4G21105	+	A	G	0.0429125	709	20.5673	5.46701e-89
3_3623991	AT3G11510	AT3G11510.1	RPS14B	-	T	C	0.0485612	702	5.90111	7.44299e-89
2_19345167	AT2G47110	AT2G47110.1,AT2G47110.2	RPS27AB	+	A	G	0.0737322	615	19.5879	1.04539e-88
5_23208751	AT5G57300	AT5G57300.1,AT5G57300.2,AT5G57300.3,AT5G57300.4	COQ5	-	T	C	0.253228	353	8.73531	1.09683e-88
2_19530873	AT2G47610	AT2G47610.1	RPL7AA	+	A	G	0.0725938	712	7.63234	1.95884e-88
1_19104077	AT1G51510	AT1G51510.1	Y14	-	T	C	0.298969	1015	4.20767	2.73258e-88
4_13944223	AT4G28060	AT4G28060.1	COX6B-3	-	T	C	0.0890842	1034	7.44175	3.34626e-88
3_20699359	AT3G55750	AT3G55750.1	RPL35AD	+	A	G	0.0296115	327	6.83193	4.87304e-88
2_13413056	AT2G31490	AT2G31490.1	AT2G31490	+	A	G	0.141965	864	7.59101	7.16226e-88
2_9237427	AT2G21580	AT2G21580.1,AT2G21580.2	RPS25B	+	A	G	0.0564523	689	5.19658	1.074e-87
1_6223089	AT1G18080	AT1G18080.1	RACK1A	+	A	G	0.0954767	1372	3.83752	1.4432e-87
4_18258457	AT4G39200	AT4G39200.1,AT4G39200.2	RPS25E	+	A	G	0.0371292	418	8.59597	2.91167e-87
1_5776442	AT1G16890	AT1G16890.2,AT1G16890.3,AT1G16890.1	UBC36	-	T	C	0.333076	431	8.77974	3.07244e-87
2_8789117	AT2G20360	AT2G20360.1	AT2G20360	+	A	G	0.25546	889	7.72229	3.26073e-87
2_17591619	AT2G42210	AT2G42210.2,AT2G42210.1	OEP163	+	A	G	0.0962718	408	7.64219	3.89301e-87
4_11266715	AT4G21105	AT4G21105.1,AT4G21105.3	AT4G21105	+	A	G	0.0494081	864	7.52569	3.95279e-87
5_9836359	AT5G27770	AT5G27770.1	RPL22C	+	A	G	0.0391399	699	5.89624	6.5163e-87
1_1216452	AT1G04480	AT1G04480.1	RPL23C	+	A	G	0.0536798	911	5.33993	1.12839e-86
5_24016508	AT5G59613	AT5G59613.2	AT5G59613	-	T	C	0.0657656	871	5.83732	1.18945e-86
1_26621230	AT1G70600	AT1G70600.1	RPL27AC	-	T	C	0.0637346	826	6.89989	1.19706e-86
5_23515865	AT5G58110	AT5G58110.1	AT5G58110	+	A	G	0.141325	659	8.74033	1.44698e-86
4_7864559	AT4G13520	AT4G13520.1,AT4G13520.2	SMAP1	+	A	G	0.0874872	681	6.91261	3.84676e-86
5_19406499	AT5G47930	AT5G47930.1	RPS27D	-	T	C	0.0331737	665	6.85472	4.36838e-86
5_24612182	AT5G61170	AT5G61170.1	RPS19C	+	A	G	0.0627496	550	6.50251	6.3231e-86
5_5865428	AT5G17770	AT5G17770.1	CBR1	-	T	C	0.0656912	431	5.50058	6.39831e-86
3_2416466	AT3G07568	AT3G07568.1	AT3G07568	-	T	C	0.22176	746	19.2536	6.76362e-86
1_12370528	AT1G34030	AT1G34030.1	RPS18A	-	T	C	0.0353009	308	6.41882	6.96135e-86
1_10640152	AT1G30230	AT1G30230.1,AT1G30230.2	AT1G30230	+	A	G	0.0517058	779	7.56819	8.28253e-86
5_1322036	AT5G04590	AT5G04590.1	SIR	+	A	G	0.110648	983	4.32371	1.64507e-85
5_23620492	AT5G58420	AT5G58420.1	RPS4D	+	A	G	0.0472344	497	8.59045	2.20564e-85
5_5939344	AT5G17920	AT5G17920.1,AT5G17920.2	MS1	+	A	G	0.0374753	285	8.40703	4.53498e-85
4_38139	AT4G00100	AT4G00100.1	RPS13B	+	A	G	0.0505278	493	18.8628	6.05155e-85
1_28528477	AT1G76010	AT1G76010.1,AT1G76010.2	AT1G76010	-	T	C	0.085962	466	7.61866	6.79018e-85
2_16838691	AT2G40316	AT2G40316.1,AT2G40316.3,AT2G40316.2	AT2G40316	+	A	G	0.313965	308	5.31907	1.65023e-84
4_6174680	AT4G09800	AT4G09800.1	RPS18A	+	A	G	0.477255	6022	2.58602	3.09427e-84
5_24289840	AT5G60390	AT5G60390.1,AT5G60390.2,AT5G60390.3	A3	+	A	G	0.0126624	381	6.27628	3.19237e-84
5_2993026	AT5G09650	AT5G09650.1	PPA6	-	T	C	0.0970313	487	4.76258	5.08317e-84
3_1027010	AT3G03960	AT3G03960.1	CCT8	+	A	G	0.0810015	385	6.13429	8.43487e-84
1_19475235	AT1G52300	AT1G52300.1	RPL37B	-	T	C	0.0355119	589	6.84522	1.23617e-83
1_5711827	AT1G16700	AT1G16700.1	AT1G16700	+	A	G	0.226721	392	6.56865	1.71528e-83
2_15170712	AT2G36160	AT2G36160.1	RPS14A	+	A	G	0.0218802	445	6.38928	3.13288e-83
5_3570685	AT5G11200	AT5G11200.1,AT5G11200.2,AT5G11200.3	RH15	+	A	G	0.231863	636	6.9854	3.55181e-83
4_6732887	AT4G11010	AT4G11010.1	NDPK3	-	T	C	0.0829082	910	6.41281	4.11235e-83
5_2321099	AT5G07350	AT5G07350.1,AT5G07350.2	Tudor1	-	T	C	0.216713	931	3.41581	4.7209e-83
5_9873898	AT5G27850	AT5G27850.1,AT5G27850.2	RPL18C	+	A	G	0.0426938	982	5.0753	6.25534e-83
4_6733227	AT4G11010	AT4G11010.1	NDPK3	-	T	C	0.0925422	1190	4.71178	6.31959e-83
3_2917572	AT3G09500	AT3G09500.1	RPL35A	+	A	G	0.0843653	2725	4.23847	1.22647e-82
5_16610613	AT5G41520	AT5G41520.1,AT5G41520.2	RPS10B	-	T	C	0.0564404	326	8.21794	1.30683e-82
2_17591548	AT2G42210	AT2G42210.2,AT2G42210.1	OEP163	+	A	G	0.0496189	319	19.0651	3.75135e-82
5_3791276	AT5G11770	AT5G11770.1	AT5G11770	-	T	C	0.0336834	433	8.4935	4.2505e-82
5_10069771	AT5G28060	AT5G28060.1	RPS24B	-	T	C	0.0446598	447	7.53813	4.40326e-82
3_19504321	AT3G52580	AT3G52580.1	RPS14C	+	A	G	0.0817031	568	4.12195	6.67197e-82
2_12769180	AT2G29960	AT2G29960.1,AT2G29960.2	CYP19-4	-	T	C	0.22655	413	7.57391	7.75149e-82
5_10070309	AT5G28060	AT5G28060.1	RPS24B	-	T	C	0.0418234	556	6.53295	8.34549e-82
5_983985	AT5G03740	AT5G03740.1	HDT3	+	A	G	0.241703	335	6.89573	9.63055e-82
5_19091940	AT5G47030	AT5G47030.1	AT5G47030	+	A	G	0.0797081	568	18.23	2.51471e-81
3_19506577	AT3G52590	AT3G52590.1	RPL40B	+	A	G	0.0200318	315	6.40233	2.64558e-81
1_25262967	AT1G67430	AT1G67430.1,AT1G67430.2	RPL17B	+	A	G	0.0222975	540	6.31705	3.29511e-81
5_10069717	AT5G28060	AT5G28060.1	RPS24B	-	T	C	0.634366	4360	2.62082	5.46206e-81
2_18046858	AT2G43460	AT2G43460.1	RPL38B	-	T	C	0.0492136	1114	4.94621	5.81781e-81
5_22393296	AT5G55190	AT5G55190.1	RAN3	+	A	G	0.0534737	381	7.39677	8.31899e-81
5_693276	AT5G02960	AT5G02960.1	RPS23B	-	T	C	0.0541449	435	18.0693	8.98613e-81
3_542406	AT3G02560	AT3G02560.1,AT3G02560.2,AT3G02560.3	RPS7B	+	A	G	0.0550962	673	6.70806	9.91269e-81
2_8965050	AT2G20820	AT2G20820.1,AT2G20820.2	AT2G20820	+	A	G	0.053291	672	8.54213	1.48194e-80
3_19506517	AT3G52590	AT3G52590.1	RPL40B	+	A	G	0.013206	336	8.36008	2.67992e-80
5_24015619	AT5G59613	AT5G59613.2,AT5G59613.1	AT5G59613	-	T	C	0.0682303	800	7.44538	3.25527e-80
5_3258957	AT5G10360	AT5G10360.1,AT5G10360.2	RPS6B	-	T	C	0.0208868	285	6.32214	3.60436e-80
1_29664566	AT1G78900	AT1G78900.1,AT1G78900.2	VHA-A	+	A	G	0.0480238	339	7.46464	6.08196e-80
1_27850004	AT1G74060	AT1G74060.1	RPL6B	-	T	C	0.0574024	278	8.38975	6.74941e-80
3_543149	AT3G02560	AT3G02560.1,AT3G02560.2,AT3G02560.3	RPS7B	+	A	G	0.0909668	430	7.50257	6.78812e-80
5_2818412	AT5G08670	AT5G08670.1	AT5G08670	-	T	C	0.103835	815	8.65257	1.03174e-79
1_26621509	AT1G70600	AT1G70600.1	RPL27AC	-	T	C	0.0213405	639	5.91424	1.34095e-79
3_16164481	AT3G44590	AT3G44590.1,AT3G44590.2	RPP2D	+	A	G	0.0450216	312	6.3032	1.5406e-79
4_10035741	AT4G18100	AT4G18100.1	RPL32A	-	T	C	0.0404412	561	6.04438	1.63062e-79
3_3778188	AT3G11940	AT3G11940.1,AT3G11940.2	RPS5B	-	T	C	0.0581438	478	8.54638	1.69433e-79
1_2463408	AT1G07940	AT1G07940.1,AT1G07940.2,AT1G07940.3,AT1G07940.4	A3	-	T	C	0.0494962	506	7.46643	4.04369e-79
3_22612550	AT3G61110	AT3G61110.1	RPS27B	+	A	G	0.0493044	769	4.96293	4.47789e-79
1_25263626	AT1G67430	AT1G67430.1,AT1G67430.2	RPL17B	+	A	G	0.0588458	622	8.50313	7.67301e-79
2_8789073	AT2G20360	AT2G20360.1	AT2G20360	+	A	G	0.077826	305	8.4802	9.0244e-79
2_134251	AT2G01250	AT2G01250.1,AT2G01250.2	RPL7B	-	T	C	0.105835	789	3.34316	1.57373e-78
3_4911466	AT3G14600	AT3G14600.1	RPL18AC	+	A	G	0.0321074	646	5.89858	1.83759e-78
1_2637109	AT1G08360	AT1G08360.1	RPL10AA	+	A	G	0.0572475	688	5.42386	3.22924e-78
3_2824978	AT3G09200	AT3G09200.1,AT3G09200.2	RPP0B	-	T	C	0.0277841	368	5.09456	3.24692e-78
4_18149004	AT4G38920	AT4G38920.1,AT4G38920.2	VHA-C3	+	A	G	0.0619917	404	8.49033	4.51832e-78
2_7547869	AT2G17360	AT2G17360.1,AT2G17360.2	RPS4A	+	A	G	0.0665281	608	4.72924	6.71485e-78
3_19543080	AT3G52730	AT3G52730.1,AT3G52730.2	AT3G52730	-	T	C	0.12512	649	19.3421	8.70779e-78
3_2823481	AT3G09200	AT3G09200.1,AT3G09200.2	RPP0B	-	T	C	0.0621161	981	3.01458	8.92851e-78
1_4639127	AT1G13560	AT1G13560.1,AT1G13560.3,AT1G13560.2	AAPT1	-	T	C	0.296849	358	4.03528	1.10405e-77
5_2828327	AT5G08690	AT5G08690.1	AT5G08690	+	A	G	0.0436598	345	7.36196	1.29617e-77
1_21086869	AT1G56330	AT1G56330.1	SAR1B	-	T	C	0.0697799	390	6.80047	3.00412e-77
3_1245775	AT3G04600	AT3G04600.1,AT3G04600.2	AT3G04600	+	A	G	0.219243	278	5.57465	5.22736e-77
5_19292834	AT5G47570	AT5G47570.1	AT5G47570	-	T	C	0.0863874	528	20.1754	1.21181e-76
4_16558626	AT4G34700	AT4G34700.1	CIB22	+	A	G	0.0542427	505	6.70002	1.47683e-76
1_29725124	AT1G79010	AT1G79010.1	AT1G79010	-	T	C	0.0845338	311	8.43583	1.54598e-76
5_15904167	AT5G39740	AT5G39740.1,AT5G39740.2	RPL5B	+	A	G	0.043026	426	5.13503	9.59681e-76
1_19855660	AT1G53240	AT1G53240.1	mMDH1	-	T	C	0.0289987	382	6.18969	1.06163e-75
4_18257852	AT4G39200	AT4G39200.1,AT4G39200.2	RPS25E	+	A	G	0.0170793	605	5.43843	1.32234e-75
3_17649810	AT3G47833	AT3G47833.1	SDH7A	+	A	G	0.080397	324	5.98331	1.48279e-75
2_18381646	AT2G44520	AT2G44520.1	COX10	+	A	G	0.295097	319	5.19443	1.50438e-75
3_2586184	AT3G08520	AT3G08520.1	RPL41E	+	A	G	0.0271685	353	8.26326	2.5141e-75
2_16475608	AT2G39460	AT2G39460.1,AT2G39460.2	RPL23AA	+	A	G	0.0292832	422	6.28594	3.14069e-75
2_14143731	AT2G33370	AT2G33370.1,AT2G33370.2	RPL23C	-	T	C	0.0450334	243	16.8539	4.19138e-75
1_1141834	AT1G04270	AT1G04270.1,AT1G04270.2	RPS15A	-	T	C	0.0537884	509	8.48797	6.75761e-75
1_5472700	AT1G15930	AT1G15930.1,AT1G15930.2	RPS12A	+	A	G	0.0427951	493	7.33331	7.28868e-75
5_23208712	AT5G57300	AT5G57300.1,AT5G57300.2,AT5G57300.3,AT5G57300.4	COQ5	-	T	C	0.213997	318	17.9298	8.16139e-75
4_251124	AT4G00585	AT4G00585.1	AT4G00585	-	T	C	0.137971	476	19.1576	8.59809e-75
5_22392457	AT5G55190	AT5G55190.1	RAN3	+	A	G	0.0642665	382	7.24503	8.6043e-75
1_5495137	AT1G16000	AT1G16000.1	AT1G16000	+	A	G	0.0906957	425	5.50501	9.10857e-75
2_7837975	AT2G18020	AT2G18020.1	RPL8A	+	A	G	0.0353829	675	5.24896	1.53508e-74
2_9829772	AT2G23090	AT2G23090.1	AT2G23090	-	T	C	0.0486305	1044	4.12577	1.64572e-74
4_14674036	AT4G30010	AT4G30010.1	AT4G30010	+	A	G	0.0957769	474	18.4663	1.65968e-74
1_28528471	AT1G76010	AT1G76010.1,AT1G76010.2	AT1G76010	-	T	C	0.0486517	258	8.26956	1.87155e-74
1_19153693	AT1G51650	AT1G51650.1	AT1G51650	+	A	G	0.0484307	699	19.2719	2.29303e-74
4_12884623	AT4G25100	AT4G25100.1,AT4G25100.4	FSD1	-	T	C	0.12552	1690	3.40791	3.601e-74
4_16558612	AT4G34700	AT4G34700.1	CIB22	+	A	G	0.0790916	808	8.41752	3.80401e-74
1_21379835	AT1G57720	AT1G57720.1,AT1G57720.2	AT1G57720	+	A	G	0.0664311	376	4.1401	4.62818e-74
3_3400483	AT3G10860	AT3G10860.1,AT3G10860.2	AT3G10860	+	A	G	0.0447488	1173	4.29047	5.88034e-74
5_6090455	AT5G18380	AT5G18380.1,AT5G18380.3,AT5G18380.2	RPS16C	-	T	C	0.0248548	642	5.18327	7.12431e-74
3_1361376	AT3G04920	AT3G04920.1,AT3G04920.2	RPS24A	+	A	G	0.0181563	310	6.45053	7.62444e-74
3_3778419	AT3G11940	AT3G11940.1,AT3G11940.2	RPS5B	-	T	C	0.0276567	457	5.09521	8.3644e-74
3_18334501	AT3G49430	AT3G49430.1,AT3G49430.2	SR34A	+	A	G	0.106505	298	5.42294	8.82167e-74
4_13944220	AT4G28060	AT4G28060.1	COX6B-3	-	T	C	0.065459	701	4.70271	1.24348e-73
2_7557443	AT2G17390	AT2G17390.1	AKR2B	+	A	G	0.0372208	270	7.1612	1.35252e-73
2_18249505	AT2G44120	AT2G44120.2,AT2G44120.1	RPL7C	-	T	C	0.055715	466	6.69125	1.75634e-73
1_6780919	AT1G19600	AT1G19600.1	AT1G19600	+	A	G	0.147751	289	4.08305	1.83225e-73
5_9874248	AT5G27850	AT5G27850.1,AT5G27850.2	RPL18C	+	A	G	0.040149	528	5.43866	1.99079e-73
1_2637247	AT1G08360	AT1G08360.1	RPL10AA	+	A	G	0.0378357	472	6.64534	2.35814e-73
5_25393256	AT5G63400	AT5G63400.1,AT5G63400.2	ADK1	-	T	C	0.073295	446	8.40856	3.12606e-73
2_12826358	AT2G30050	AT2G30050.1	SEC13B	+	A	G	0.188923	556	4.94821	3.31935e-73
3_17454430	AT3G47370	AT3G47370.1,AT3G47370.2,AT3G47370.3	RPS20B	-	T	C	0.039704	338	5.65831	3.3917e-73
4_16856033	AT4G35490	AT4G35490.1,AT4G35490.2	MRPL11	+	A	G	0.056865	497	4.57586	4.74371e-73
2_8515891	AT2G19750	AT2G19750.1	RPS30C	+	A	G	0.0952117	344	7.30428	7.11576e-73
3_2824992	AT3G09200	AT3G09200.1,AT3G09200.2	RPP0B	-	T	C	0.0396804	447	6.57802	8.2393e-73
1_18285703	AT1G49410	AT1G49410.1	TOM6	-	T	C	0.0646116	415	8.32294	9.05375e-73
3_1622626	AT3G05590	AT3G05590.1,AT3G05590.2	RPL18B	+	A	G	0.0362589	699	5.9419	1.26911e-72
5_534387	AT5G02450	AT5G02450.1	RPL36C	+	A	G	0.0458261	398	7.28211	1.33632e-72
4_14562922	AT4G29735	AT4G29735.1,AT4G29735.2	AT4G29735	-	T	C	0.1801	324	17.5884	1.42047e-72
3_22124441	AT3G59890	AT3G59890.1,AT3G59890.2	DAPB2	-	T	C	0.692607	178	6.10955	2.09442e-72
1_10858542	AT1G30630	AT1G30630.1	AT1G30630	-	T	C	0.100512	275	7.24761	2.2355e-72
3_18504357	AT3G49910	AT3G49910.1	RPL26A	+	A	G	0.196861	4628	1.90463	3.22788e-72
2_16710040	AT2G40010	AT2G40010.1	RPP0A	-	T	C	0.468278	310	4.0656	4.2633e-72
1_2408766	AT1G07770	AT1G07770.1,AT1G07770.2,AT1G07770.3	RPS15AA	-	T	C	0.230331	4002	4.88811	4.69411e-72
2_16710232	AT2G40010	AT2G40010.1	RPP0A	-	T	C	0.453846	295	6.63092	7.82355e-72
3_3482934	AT3G11130	AT3G11130.1	CHC1	-	T	C	0.185436	629	3.13507	1.37673e-71
2_14177256	AT2G33470	AT2G33470.1,AT2G33470.2	GLTP1	-	T	C	0.0786079	323	4.47413	1.67672e-71
1_27244152	AT1G72370	AT1G72370.1,AT1G72370.2	RPSAA	-	T	C	0.0757018	1564	2.47107	2.40445e-71
5_5373493	AT5G16440	AT5G16440.1	IPP1	+	A	G	0.0892543	304	8.30473	4.41874e-71
1_24560357	AT1G65980	AT1G65980.1,AT1G65980.2	PRXIIB	-	T	C	0.0420859	983	5.54484	4.84674e-71
4_12743911	AT4G24690	AT4G24690.1	AT4G24690	+	A	G	0.102941	518	2.65514	6.44153e-71
2_14532816	AT2G34480	AT2G34480.1,AT2G34480.2	RPL18AB	-	T	C	0.0636511	432	7.27708	7.70515e-71
1_12371099	AT1G34030	AT1G34030.1	RPS18A	-	T	C	0.0495211	424	6.16414	1.07114e-70
2_18046273	AT2G43460	AT2G43460.1	RPL38B	-	T	C	0.0310155	463	6.57173	1.17574e-70
3_6324404	AT3G18410	AT3G18410.1	AT3G18410	+	A	G	0.109885	677	8.42461	1.20553e-70
1_12024479	AT1G33140	AT1G33140.1	RPL9B	+	A	G	0.0274066	443	6.62963	1.25069e-70
4_16568197	AT4G34720	AT4G34720.1,AT4G34720.2	VHA-C3	-	T	C	0.0598626	366	19.7275	1.3885e-70
1_22719363	AT1G61570	AT1G61570.1	TIM13	-	T	C	0.118031	849	3.72839	1.89034e-70
1_24541460	AT1G65930	AT1G65930.1	CICDH	+	A	G	0.0181193	274	4.69678	3.40615e-70
3_1622021	AT3G05590	AT3G05590.1,AT3G05590.2	RPL18B	+	A	G	0.0174877	579	19.1374	5.02858e-70
2_8512478	AT2G19730	AT2G19730.1,AT2G19730.2,AT2G19730.3	RPL28A	+	A	G	0.0255695	532	8.42989	5.90799e-70
2_14144069	AT2G33370	AT2G33370.1,AT2G33370.2	RPL23C	-	T	C	0.0451557	467	18.8298	8.99499e-70
4_10302383	AT4G18730	AT4G18730.1	RPL11B	+	A	G	0.0204711	345	6.48575	9.21737e-70
5_4978835	AT5G15320	AT5G15320.1,AT5G15320.2	AT5G15320	+	A	G	0.183109	258	8.16867	9.37451e-70
3_1168285	AT3G04400	AT3G04400.1,AT3G04400.2	RPL23C	+	A	G	0.0225806	441	6.54403	1.04132e-69
2_16918840	AT2G40510	AT2G40510.1	RPS26B	+	A	G	0.0963392	1379	3.4791	1.22648e-69
3_602660	AT3G02780	AT3G02780.1,AT3G02780.2	IPP2	-	T	C	0.082808	683	4.88377	1.59432e-69
2_133049	AT2G01250	AT2G01250.1,AT2G01250.2	RPL7B	-	T	C	0.0312633	368	4.24801	1.7158e-69
5_17622563	AT5G43830	AT5G43830.1	AT5G43830	-	T	C	0.0987148	361	3.71209	1.74326e-69
3_19397879	AT3G52300	AT3G52300.1,AT3G52300.2	ATPQ	+	A	G	0.0325502	532	7.23907	2.69653e-69
5_16676112	AT5G41700	AT5G41700.1,AT5G41700.3,AT5G41700.4	UBC8	+	A	G	0.0307109	340	8.23476	3.52214e-69
4_7864646	AT4G13520	AT4G13520.1,AT4G13520.2	SMAP1	+	A	G	0.0505353	354	5.82203	4.19118e-69
5_8009198	AT5G23740	AT5G23740.1	RPS11C	-	T	C	0.0673532	981	3.26971	4.46311e-69
1_9172454	AT1G26550	AT1G26550.1	AT1G26550	+	A	G	0.104866	1280	4.18123	7.49765e-69
5_3259495	AT5G10360	AT5G10360.1,AT5G10360.2	RPS6B	-	T	C	0.106677	2256	2.54081	9.62648e-69
4_6174667	AT4G09800	AT4G09800.1	RPS18A	+	A	G	0.0243402	320	6.47161	1.32955e-68
1_27928453	AT1G74270	AT1G74270.1	RPL35AC	-	T	C	0.057755	372	7.21397	1.45986e-68
3_6880528	AT3G19820	AT3G19820.1,AT3G19820.2,AT3G19820.3	DIM	-	T	C	0.0492651	362	4.28293	1.50588e-68
5_25548613	AT5G63840	AT5G63840.2,AT5G63840.1	PSL5	+	A	G	0.247357	351	5.70289	1.73159e-68
5_20082092	AT5G49510	AT5G49510.1,AT5G49510.2	PFD3	+	A	G	0.198941	526	3.68404	1.99999e-68
2_8558102	AT2G19830	AT2G19830.2,AT2G19830.1	VPS32.1	-	T	C	0.181393	349	4.98262	2.33213e-68
5_6804272	AT5G20160	AT5G20160.1,AT5G20160.2	AT5G20160	-	T	C	0.256458	1231	3.07026	3.05625e-68
4_38150	AT4G00100	AT4G00100.1	RPS13B	+	A	G	0.0359012	295	18.9706	4.20115e-68
3_9270661	AT3G25520	AT3G25520.1,AT3G25520.3	ATL5	-	T	C	0.0276861	369	5.08852	4.24912e-68
1_17717284	AT1G48030	AT1G48030.1,AT1G48030.2,AT1G48030.3,AT1G48030.4,AT1G48030.5	LPD1	-	T	C	0.228445	310	6.24313	6.61221e-68
5_8064195	AT5G23900	AT5G23900.1	RPL13D	-	T	C	0.0493849	285	7.08194	7.19409e-68
5_3621025	AT5G11340	AT5G11340.1	AT5G11340	+	A	G	0.132252	212	17.0968	8.22815e-68
1_6214257	AT1G18070	AT1G18070.1,AT1G18070.3	AT1G18070	-	T	C	0.156522	306	17.9418	9.31831e-68
5_9873877	AT5G27850	AT5G27850.1,AT5G27850.2	RPL18C	+	A	G	0.0122735	273	6.00085	1.41137e-67
4_11759398	AT4G22220	AT4G22220.1	ISU1	-	T	C	0.130286	419	8.4263	2.4815e-67
5_3570571	AT5G11200	AT5G11200.1,AT5G11200.2,AT5G11200.3	RH15	+	A	G	0.230341	621	6.03954	4.57232e-67
3_19660699	AT3G53020	AT3G53020.1	RPL24B	-	T	C	0.0410496	255	5.15836	6.89584e-67
2_9320622	AT2G21870	AT2G21870.1,AT2G21870.2	MGP1	-	T	C	0.0450612	552	5.33163	7.7623e-67
3_2917846	AT3G09500	AT3G09500.1	RPL35A	+	A	G	0.0587989	703	4.93387	7.79688e-67
1_6223121	AT1G18080	AT1G18080.1	RACK1A	+	A	G	0.0241723	376	4.80537	8.7745e-67
3_4433855	AT3G13580	AT3G13580.1,AT3G13580.2,AT3G13580.3,AT3G13580.4,AT3G13580.5,AT3G13580.6,AT3G13580.7,AT3G13580.8,AT3G13580.9	RPL7D	+	A	G	0.127076	612	8.23128	9.17968e-67
3_19952703	AT3G53870	AT3G53870.1	RPS3B	+	A	G	0.0345922	338	5.81423	9.28139e-67
2_14806568	AT2G35120	AT2G35120.1	GDH2	-	T	C	0.0268324	313	4.7964	9.73446e-67
3_22269586	AT3G60245	AT3G60245.1	RPL37AC	+	A	G	0.0332397	959	4.60593	1.49451e-66
2_15671098	AT2G37340	AT2G37340.1,AT2G37340.2,AT2G37340.3	RS2Z33	-	T	C	0.119318	315	7.04428	1.51196e-66
2_2236106	AT2G05840	AT2G05840.1,AT2G05840.2,AT2G05840.3	PAA2	+	A	G	0.0834852	229	7.06444	1.51789e-66
3_20562793	AT3G55460	AT3G55460.1	SCL30	+	A	G	0.0685672	279	5.70545	1.86179e-66
1_2685269	AT1G08480	AT1G08480.1	SDH6	+	A	G	0.0781483	314	18.2755	1.92775e-66
1_27540666	AT1G73230	AT1G73230.1	AT1G73230	-	T	C	0.0323929	341	5.12154	2.18465e-66
4_9401081	AT4G16720	AT4G16720.1	RPL15A	-	T	C	0.0134205	351	5.15861	2.25696e-66
4_6947896	AT4G11420	AT4G11420.1	TIF3A1	-	T	C	0.217456	436	4.31643	2.37469e-66
3_2616668	AT3G08610	AT3G08610.1	AT3G08610	-	T	C	0.0343328	458	5.69566	3.33713e-66
5_19092209	AT5G47030	AT5G47030.1	AT5G47030	+	A	G	0.18449	295	18.2801	4.54642e-66
2_14532915	AT2G34480	AT2G34480.1,AT2G34480.2	RPL18AB	-	T	C	0.055025	749	5.24233	8.80047e-66
4_16339189	AT4G34110	AT4G34110.1	PAB2	+	A	G	0.0341825	318	5.01482	9.19392e-66
1_25393359	AT1G67730	AT1G67730.1	KCR1	+	A	G	0.133258	236	5.76589	1.30055e-65
3_17088714	AT3G46430	AT3G46430.1	AT3G46430	+	A	G	0.173077	243	17.522	1.34889e-65
4_16568198	AT4G34720	AT4G34720.1,AT4G34720.2	VHA-C3	-	T	C	0.0629735	399	8.30096	1.3797e-65
3_20453094	AT3G55170	AT3G55170.1,AT3G55170.3	RPL35C	-	T	C	0.178602	212	8.09768	1.58492e-65
1_26688422	AT1G70770	AT1G70770.1	AT1G70770	-	T	C	0.192558	207	8.13628	1.66253e-65
5_3792578	AT5G11770	AT5G11770.1	AT5G11770	-	T	C	0.0285896	225	6.96457	4.83253e-65
4_18257867	AT4G39200	AT4G39200.1,AT4G39200.2	RPS25E	+	A	G	0.013481	465	18.3889	5.09886e-65
4_13594140	AT4G27090	AT4G27090.1	RPL14B	-	T	C	0.0444361	710	6.56817	6.39066e-65
3_2823974	AT3G09200	AT3G09200.1,AT3G09200.2	RPP0B	-	T	C	0.0301935	493	5.2103	6.48866e-65
4_18258390	AT4G39200	AT4G39200.1,AT4G39200.2	RPS25E	+	A	G	0.0259381	497	18.4084	6.59205e-65
4_15132180	AT4G31120	AT4G31120.1,AT4G31120.2	PMRT15	-	T	C	0.516456	204	6.69535	7.70616e-65
3_17779417	AT3G48140	AT3G48140.1	T24C20_20	+	A	G	0.0376318	382	7.13347	9.07516e-65
5_19092053	AT5G47030	AT5G47030.1	AT5G47030	+	A	G	0.0678596	402	7.19193	9.43836e-65
1_10831883	AT1G30580	AT1G30580.1	AT1G30580	-	T	C	0.120742	358	18.9967	1.04436e-64
5_5406690	AT5G16550	AT5G16550.1	AT5G16550	+	A	G	0.211581	285	4.10781	1.10917e-64
5_22057256	AT5G54310	AT5G54310.1	AGD5	-	T	C	0.266003	187	7.15892	1.41779e-64
4_13555412	AT4G27000	AT4G27000.1	RBP45C	-	T	C	0.0921244	317	7.19056	2.01232e-64
2_9237503	AT2G21580	AT2G21580.1,AT2G21580.2	RPS25B	+	A	G	0.0585966	395	8.22323	2.171e-64
1_27541097	AT1G73230	AT1G73230.1	AT1G73230	-	T	C	0.0220095	292	4.7261	2.33461e-64
2_673535	AT2G02510	AT2G02510.1	AT2G02510	+	A	G	0.038576	402	17.9145	2.53092e-64
3_19318034	AT3G52090	AT3G52090.1,AT3G52090.2	NRPB11	-	T	C	0.129344	268	16.9896	2.93295e-64
1_27109417	AT1G72020	AT1G72020.1	AT1G72020	-	T	C	0.0695284	460	7.14743	3.99467e-64
2_19531465	AT2G47610	AT2G47610.1	RPL7AA	+	A	G	0.0507867	326	19.4024	4.36704e-64
1_24560323	AT1G65980	AT1G65980.1,AT1G65980.2	PRXIIB	-	T	C	0.0427715	913	5.15025	5.06531e-64
1_18986154	AT1G51200	AT1G51200.1,AT1G51200.2,AT1G51200.3,AT1G51200.4	SAP2	+	A	G	0.165119	960	3.71895	5.92141e-64
1_24249114	AT1G65290	AT1G65290.1	MTACP2	-	T	C	0.0517575	561	6.04233	6.50976e-64
3_5670200	AT3G16640	AT3G16640.1	TCTP	-	T	C	0.120627	4679	2.25012	7.42048e-64
1_10640037	AT1G30230	AT1G30230.1,AT1G30230.2	AT1G30230	+	A	G	0.0316917	435	6.49758	8.16711e-64
5_10069792	AT5G28060	AT5G28060.1	RPS24B	-	T	C	0.0394575	448	7.14435	1.06386e-63
1_2637494	AT1G08360	AT1G08360.1	RPL10AA	+	A	G	0.0378244	395	6.50687	1.30777e-63
3_18167057	AT3G49010	AT3G49010.1,AT3G49010.4,AT3G49010.5	RPL13B	-	T	C	0.0358432	576	5.21351	1.38935e-63
5_6764142	AT5G20020	AT5G20020.1	RAN2	+	A	G	0.0462323	535	5.40514	1.56146e-63
2_7547872	AT2G17360	AT2G17360.1,AT2G17360.2	RPS4A	+	A	G	0.0377534	324	18.9814	1.58298e-63
5_16315431	AT5G40770	AT5G40770.1	PHB3	-	T	C	0.105652	286	16.6668	1.7486e-63
5_795892	AT5G03290	AT5G03290.1	IDH5	+	A	G	0.0708385	283	7.11358	1.82829e-63
2_15170292	AT2G36160	AT2G36160.1	RPS14A	+	A	G	0.0478705	562	6.42627	2.09676e-63
3_2917618	AT3G09500	AT3G09500.1	RPL35A	+	A	G	0.00985593	301	6.37053	2.22451e-63
1_26621211	AT1G70600	AT1G70600.1	RPL27AC	-	T	C	0.0207588	232	7.88552	2.62763e-63
3_21674446	AT3G58610	AT3G58610.1,AT3G58610.2,AT3G58610.3	AT3G58610	+	A	G	0.0688842	584	3.75304	2.6487e-63
5_693854	AT5G02960	AT5G02960.1	RPS23B	-	T	C	0.00985222	248	6.84535	3.40398e-63
4_16336921	AT4G34110	AT4G34110.1	PAB2	+	A	G	0.0411909	469	5.16094	5.79387e-63
4_16172324	AT4G33680	AT4G33680.1	DAP	-	T	C	0.128139	250	4.78646	8.61639e-63
4_6174314	AT4G09800	AT4G09800.1	RPS18A	+	A	G	0.018281	258	7.92429	8.62005e-63
2_14531171	AT2G34470	AT2G34470.1,AT2G34470.2	UREG	-	T	C	0.0728863	225	8.05107	8.6921e-63
1_27244054	AT1G72370	AT1G72370.1,AT1G72370.2	RPSAA	-	T	C	0.0152715	272	6.35917	9.84639e-63
1_6213978	AT1G18070	AT1G18070.1,AT1G18070.3	AT1G18070	-	T	C	0.236049	368	6.55701	1.02103e-62
3_18504754	AT3G49910	AT3G49910.1	RPL26A	+	A	G	0.048928	550	6.00882	1.78067e-62
3_18504780	AT3G49910	AT3G49910.1	RPL26A	+	A	G	0.0357923	393	8.17589	1.91579e-62
1_1315399	AT1G04690	AT1G04690.1	KAB1	+	A	G	0.10357	206	16.7217	3.08346e-62
3_17139181	AT3G46560	AT3G46560.1	TIM9	+	A	G	0.0730007	534	7.00698	4.71795e-62
4_16476814	AT4G34450	AT4G34450.1	AT4G34450	+	A	G	0.0628051	193	6.98939	5.36849e-62
5_6581996	AT5G19510	AT5G19510.1	AT5G19510	-	T	C	0.0119956	198	16.9424	6.60088e-62
1_25263618	AT1G67430	AT1G67430.1,AT1G67430.2	RPL17B	+	A	G	0.0290441	316	5.41279	7.01675e-62
5_6764149	AT5G20020	AT5G20020.1	RAN2	+	A	G	0.0632179	743	4.10084	7.02698e-62
4_15637781	AT4G32390	AT4G32390.1	AT4G32390	+	A	G	0.149134	241	7.16661	7.45253e-62
5_7436057	AT5G22440	AT5G22440.1,AT5G22440.2	RPL10AC	-	T	C	0.0659925	496	5.38274	9.49304e-62
1_12024496	AT1G33140	AT1G33140.1	RPL9B	+	A	G	0.0384428	552	6.4161	1.09005e-61
1_28594560	AT1G76200	AT1G76200.1	AT1G76200	+	A	G	0.0725816	616	17.9817	1.10106e-61
3_1622699	AT3G05590	AT3G05590.1,AT3G05590.2	RPL18B	+	A	G	0.0471517	812	5.51816	1.12853e-61
3_5299685	AT3G15640	AT3G15640.1,AT3G15640.2	COX5B-1	+	A	G	0.260675	1166	2.9773	1.19895e-61
1_608073	AT1G02780	AT1G02780.1	RPL19A	-	T	C	0.0275809	576	6.90012	1.285e-61
3_19661334	AT3G53020	AT3G53020.1	RPL24B	-	T	C	0.0151718	589	4.67362	1.59278e-61
5_2956398	AT5G09510	AT5G09510.1,AT5G09510.2	RPS15D	-	T	C	0.0238224	264	5.86817	1.68811e-61
1_12011575	AT1G33120	AT1G33120.1	RPL9B	+	A	G	0.0229988	283	5.98043	1.72519e-61
1_9172530	AT1G26550	AT1G26550.1	AT1G26550	+	A	G	0.0824742	608	5.216	1.84127e-61
3_19504279	AT3G52580	AT3G52580.1	RPS14C	+	A	G	0.573353	4768	1.90854	1.95862e-61
2_14019096	AT2G33040	AT2G33040.1	ATPC	-	T	C	0.0194151	243	6.92778	2.29066e-61
1_27244721	AT1G72370	AT1G72370.1,AT1G72370.2	RPSAA	-	T	C	0.0801392	1796	2.39865	2.44149e-61
5_14275208	AT5G36230	AT5G36230.1,AT5G36230.2	AT5G36230	+	A	G	0.123052	308	8.05696	3.15402e-61
1_5165853	AT1G14980	AT1G14980.1,AT1G14980.2	CPN10	-	T	C	0.0590876	329	17.1466	4.08568e-61
5_2203016	AT5G07090	AT5G07090.1,AT5G07090.2	RPS4B	+	A	G	0.0412064	567	4.94202	6.45116e-61
1_18177717	AT1G49140	AT1G49140.1,AT1G49140.2	AT1G49140	-	T	C	0.0928676	569	6.41837	6.79642e-61
4_18149001	AT4G38920	AT4G38920.1,AT4G38920.2	VHA-C3	+	A	G	0.0292742	194	18.241	8.51674e-61
1_25262961	AT1G67430	AT1G67430.1,AT1G67430.2	RPL17B	+	A	G	0.0315505	853	5.46414	1.10255e-60
5_26937078	AT5G67500	AT5G67500.3,AT5G67500.1,AT5G67500.2	VDAC2	+	A	G	0.0694773	323	8.12514	1.32702e-60
4_16039122	AT4G33250	AT4G33250.1	TIF3K1	-	T	C	0.11215	396	7.06281	1.50119e-60
2_13639608	AT2G32060	AT2G32060.1,AT2G32060.2,AT2G32060.3	RPS12C	-	T	C	0.0247726	286	6.9704	2.0983e-60
5_2577322	AT5G08040	AT5G08040.1	TOM5	-	T	C	0.589498	3020	2.90254	2.2423e-60
2_15670614	AT2G37340	AT2G37340.1,AT2G37340.2,AT2G37340.3	RS2Z33	-	T	C	0.12457	398	7.02749	2.48902e-60
4_6190391	AT4G09830	AT4G09830.1	AT4G09830	+	A	G	0.0818404	201	6.04239	2.77588e-60
3_3483123	AT3G11130	AT3G11130.1	CHC1	-	T	C	0.0643305	246	5.02397	3.27324e-60
3_19504792	AT3G52580	AT3G52580.1	RPS14C	+	A	G	0.10678	189	16.7639	3.86705e-60
4_13554905	AT4G27000	AT4G27000.1	RBP45C	-	T	C	0.0725784	266	5.72511	4.47441e-60
1_8069097	AT1G22780	AT1G22780.1	RPS18A	+	A	G	0.0440457	324	18.8195	5.51019e-60
2_8514361	AT2G19740	AT2G19740.1	RPL31A	+	A	G	0.0697749	217	7.84861	6.27175e-60
5_9873961	AT5G27850	AT5G27850.1,AT5G27850.2	RPL18C	+	A	G	0.022315	497	6.40604	8.03239e-60
1_21073194	AT1G56280	AT1G56280.1,AT1G56280.2	ATDI19	-	T	C	0.0659691	662	3.54356	8.23095e-60
5_25681794	AT5G64200	AT5G64200.1,AT5G64200.2	SC35	-	T	C	0.199593	196	6.385	9.59333e-60
1_2637624	AT1G08360	AT1G08360.1	RPL10AA	+	A	G	0.036494	336	18.9429	1.19945e-59
2_19345073	AT2G47110	AT2G47110.1,AT2G47110.2	RPS27AB	+	A	G	0.0145685	198	17.6033	1.23048e-59
3_18504672	AT3G49910	AT3G49910.1	RPL26A	+	A	G	0.0188191	320	4.96339	1.69094e-59
3_4433870	AT3G13580	AT3G13580.1,AT3G13580.2,AT3G13580.3,AT3G13580.4,AT3G13580.5,AT3G13580.6,AT3G13580.7,AT3G13580.8,AT3G13580.9	RPL7D	+	A	G	0.0777009	438	17.4292	1.90725e-59
4_11791933	AT4G22310	AT4G22310.1	MPC4	+	A	G	0.0462004	504	5.8751	2.54294e-59
4_16535845	AT4G34620	AT4G34620.1	SSR16	-	T	C	0.0442652	428	6.25716	3.20778e-59
3_368538	AT3G02090	AT3G02090.1,AT3G02090.2	MPPBETA	+	A	G	0.0410719	282	17.7657	3.47923e-59
5_7015059	AT5G20720	AT5G20720.1,AT5G20720.2,AT5G20720.3,AT5G20720.4	CPN21	+	A	G	0.0461611	392	4.41082	3.66123e-59
3_2824628	AT3G09200	AT3G09200.1,AT3G09200.2	RPP0B	-	T	C	0.0215958	452	4.34989	5.33529e-59
2_8459279	AT2G19520	AT2G19520.1	MSI4	+	A	G	0.134559	183	17.1326	5.47526e-59
4_16558580	AT4G34700	AT4G34700.1	CIB22	+	A	G	0.0276911	293	16.4439	6.45709e-59
2_14531380	AT2G34470	AT2G34470.1,AT2G34470.2	UREG	-	T	C	0.261375	764	4.61416	6.61806e-59
4_11792671	AT4G22310	AT4G22310.1	MPC4	+	A	G	0.121579	422	18.291	7.00599e-59
5_1389347	AT5G04800	AT5G04800.1,AT5G04800.2,AT5G04800.3,AT5G04800.4	RPS17D	+	A	G	0.0301098	477	3.87091	7.54417e-59
1_3136642	AT1G09690	AT1G09690.1	RPL21A	-	T	C	0.0245774	647	5.61319	8.02735e-59
1_16942368	AT1G44835	AT1G44835.1,AT1G44835.2	AT1G44835	+	A	G	0.335548	202	17.3298	1.46268e-58
3_2123707	AT3G06720	AT3G06720.1,AT3G06720.2	IMPA1	+	A	G	0.22538	460	3.95202	1.56509e-58
5_19406359	AT5G47930	AT5G47930.1	RPS27D	-	T	C	0.0612993	351	8.07203	2.01965e-58
5_9837107	AT5G27770	AT5G27770.1	RPL22C	+	A	G	0.0395496	288	5.38084	2.05122e-58
4_11266399	AT4G21105	AT4G21105.1,AT4G21105.3	AT4G21105	+	A	G	0.027285	546	6.30958	2.1513e-58
4_16370566	AT4G34180	AT4G34180.1	AT4G34180	-	T	C	0.0341478	232	18.4592	2.81849e-58
1_2408714	AT1G07770	AT1G07770.1,AT1G07770.2,AT1G07770.3	RPS15AA	-	T	C	0.018053	321	7.94896	2.89559e-58
1_20104553	AT1G53850	AT1G53850.1,AT1G53850.2	PAE1	-	T	C	0.0608947	211	17.2039	3.16311e-58
4_6948175	AT4G11420	AT4G11420.1	TIF3A1	-	T	C	0.107942	439	5.89358	3.80773e-58
2_10562789	AT2G24765	AT2G24765.1,AT2G24765.2	ARF3	+	A	G	0.224792	486	2.83294	4.44008e-58
2_9071668	AT2G21170	AT2G21170.1,AT2G21170.2	TIM	-	T	C	0.0640868	313	4.91616	4.44614e-58
5_19092075	AT5G47030	AT5G47030.1	AT5G47030	+	A	G	0.0587764	220	17.8359	4.48073e-58
1_13452870	AT1G36050	AT1G36050.2,AT1G36050.1	AT1G36050	+	A	G	0.239306	207	5.03447	4.92599e-58
5_23032207	AT5G56940	AT5G56940.1	AT5G56940	+	A	G	0.216507	181	16.4889	5.93533e-58
1_13122571	AT1G35580	AT1G35580.1,AT1G35580.2	CINV1	-	T	C	0.11924	621	3.53517	6.76053e-58
2_14531393	AT2G34470	AT2G34470.1,AT2G34470.2	UREG	-	T	C	0.394784	1090	2.76663	6.89557e-58
1_4889450	AT1G14320	AT1G14320.1,AT1G14320.2	RPL10A	+	A	G	0.0282053	394	5.9393	7.08745e-58
3_22611708	AT3G61110	AT3G61110.1	RPS27B	+	A	G	0.0342183	357	5.78809	8.56136e-58
5_693280	AT5G02960	AT5G02960.1	RPS23B	-	T	C	0.022919	201	7.80123	9.10788e-58
5_9807880	AT5G27700	AT5G27700.1	RPS21C	-	T	C	0.0469328	824	4.07679	9.31663e-58
5_22393956	AT5G55190	AT5G55190.1	RAN3	+	A	G	0.064843	320	17.9692	1.00917e-57
3_542798	AT3G02560	AT3G02560.1,AT3G02560.2,AT3G02560.3	RPS7B	+	A	G	0.0293393	262	6.81288	1.0651e-57
5_23620216	AT5G58420	AT5G58420.1	RPS4D	+	A	G	0.0350312	500	4.86336	1.14746e-57
5_7016311	AT5G20720	AT5G20720.1,AT5G20720.2,AT5G20720.3,AT5G20720.4	CPN21	+	A	G	0.0792793	308	3.63936	1.14839e-57
1_8854394	AT1G25260	AT1G25260.1	AT1G25260	-	T	C	0.338033	1031	2.16072	1.58877e-57
5_8008736	AT5G23740	AT5G23740.1	RPS11C	-	T	C	0.0240564	420	5.3327	1.78691e-57
1_27540293	AT1G73230	AT1G73230.1	AT1G73230	-	T	C	0.273518	346	5.99224	1.96201e-57
3_2823886	AT3G09200	AT3G09200.1,AT3G09200.2	RPP0B	-	T	C	0.0242169	351	5.90689	2.20967e-57
5_2577287	AT5G08040	AT5G08040.1	TOM5	-	T	C	0.0742706	252	18.1119	2.45405e-57
4_14465213	AT4G29390	AT4G29390.1	RPS30C	-	T	C	0.0297456	359	6.8916	3.46814e-57
1_10639835	AT1G30230	AT1G30230.1,AT1G30230.2	AT1G30230	+	A	G	0.0238408	327	6.90255	3.47984e-57
5_19390394	AT5G47890	AT5G47890.1	AT5G47890	+	A	G	0.0800635	504	7.88074	3.54113e-57
2_7548085	AT2G17360	AT2G17360.1,AT2G17360.2	RPS4A	+	A	G	0.0290753	277	7.97238	3.55732e-57
3_3399924	AT3G10860	AT3G10860.1,AT3G10860.2	AT3G10860	+	A	G	0.0419767	1399	3.46584	3.55941e-57
1_3136657	AT1G09690	AT1G09690.1	RPL21A	-	T	C	0.0167198	472	5.64454	3.83584e-57
3_17650479	AT3G47836	AT3G47836.1,AT3G47836.2	AT3G47836	-	T	C	0.100871	440	8.05882	4.37877e-57
5_3676810	AT5G11500	AT5G11500.1,AT5G11500.2	AT5G11500	+	A	G	0.0679459	648	4.28707	5.60266e-57
5_5939047	AT5G17920	AT5G17920.1,AT5G17920.2	MS1	+	A	G	0.0357016	501	5.82932	5.89406e-57
1_23789564	AT1G64090	AT1G64090.1,AT1G64090.2	RTNLB3	+	A	G	0.034969	248	5.04031	1.02168e-56
3_21635533	AT3G58500	AT3G58500.1	PP2A3	-	T	C	0.0740648	295	8.06065	1.25706e-56
2_775235	AT2G02760	AT2G02760.1,AT2G02760.2,AT2G02760.3,AT2G02760.4	UBC2	+	A	G	0.0953187	169	17.6187	1.30589e-56
5_17159192	AT5G42790	AT5G42790.1	PAF1	-	T	C	0.122011	199	16.9425	1.48361e-56
5_5081977	AT5G15610	AT5G15610.2,AT5G15610.1	AT5G15610	+	A	G	0.183293	226	18.2441	1.90107e-56
3_8010650	AT3G22630	AT3G22630.1	PBD1	-	T	C	0.0512571	263	5.0046	1.9913e-56
4_18011318	AT4G38510	AT4G38510.5,AT4G38510.1	VHA-B2	-	T	C	0.0588486	276	17.7785	2.10389e-56
1_8855334	AT1G25260	AT1G25260.1	AT1G25260	-	T	C	0.111242	377	3.26686	2.33103e-56
3_20893152	AT3G56340	AT3G56340.1	RPS26C	-	T	C	0.0249932	457	4.82395	2.63852e-56
3_19810026	AT3G53430	AT3G53430.1	RPL12B	-	T	C	0.01631	237	6.78975	3.19753e-56
5_4472450	AT5G13850	AT5G13850.1	NACA3	+	A	G	0.0402736	318	4.77653	4.03927e-56
1_296208	AT1G01820	AT1G01820.1	PEX11C	-	T	C	0.128878	162	17.7428	4.52681e-56
5_8008240	AT5G23740	AT5G23740.1	RPS11C	-	T	C	0.0575293	285	17.7814	6.92336e-56
4_16535159	AT4G34620	AT4G34620.1	SSR16	-	T	C	0.0651915	383	8.07973	7.24677e-56
2_15170286	AT2G36160	AT2G36160.1	RPS14A	+	A	G	0.0332091	383	7.82342	8.62258e-56
1_3917865	AT1G11650	AT1G11650.2,AT1G11650.1	RBP45B	+	A	G	0.0448315	314	6.87591	8.99336e-56
4_18257624	AT4G39200	AT4G39200.1,AT4G39200.2	RPS25E	+	A	G	0.0243883	604	6.77928	9.39035e-56
3_20554547	AT3G55440	AT3G55440.1	CTIMC	+	A	G	0.0342451	984	3.29975	9.48859e-56
5_26959351	AT5G67590	AT5G67590.1	FRO1	+	A	G	0.0373285	204	17.5088	9.77449e-56
3_21996283	AT3G59540	AT3G59540.1	RPL38B	-	T	C	0.0167929	297	5.39144	1.17967e-55
1_6800179	AT1G19660	AT1G19660.1,AT1G19660.3	BBD2	-	T	C	0.257576	187	4.64584	1.4754e-55
4_14564076	AT4G29735	AT4G29735.1,AT4G29735.2	AT4G29735	-	T	C	0.034869	193	16.984	1.62945e-55
3_1009131	AT3G03920	AT3G03920.1	AT3G03920	-	T	C	0.0592639	190	17.793	1.67782e-55
2_14143741	AT2G33370	AT2G33370.1,AT2G33370.2	RPL23C	-	T	C	0.058092	341	17.1665	1.68307e-55
1_30007955	AT1G79750	AT1G79750.1	NADP-ME4	-	T	C	0.0575797	177	6.83105	2.08414e-55
4_14562921	AT4G29735	AT4G29735.1,AT4G29735.2	AT4G29735	-	T	C	0.0987859	179	16.6107	2.12451e-55
1_23733632	AT1G63940	AT1G63940.2,AT1G63940.4,AT1G63940.3,AT1G63940.1	MDAR6	+	A	G	0.0664831	169	16.0519	2.16247e-55
4_15190657	AT4G31300	AT4G31300.1,AT4G31300.2	PBA1	+	A	G	0.113888	916	4.36019	2.22009e-55
5_4787779	AT5G14800	AT5G14800.1,AT5G14800.2	PROC1	-	T	C	0.111781	278	5.23245	2.75241e-55
5_19390402	AT5G47890	AT5G47890.1	AT5G47890	+	A	G	0.0748201	416	8.03602	3.90381e-55
3_1082997	AT3G04120	AT3G04120.1	GAPC1	+	A	G	0.00836882	285	4.32742	3.98369e-55
1_27243147	AT1G72370	AT1G72370.1,AT1G72370.2	RPSAA	-	T	C	0.0135979	183	7.72876	4.52543e-55
4_251089	AT4G00585	AT4G00585.1	AT4G00585	-	T	C	0.43262	748	3.93488	4.74239e-55
5_7087043	AT5G20890	AT5G20890.1	CCT2	-	T	C	0.131494	572	4.90071	5.20035e-55
5_4935981	AT5G15200	AT5G15200.1,AT5G15200.2	RPS9B	-	T	C	0.00805369	210	7.60936	6.22875e-55
1_24686345	AT1G66240	AT1G66240.2,AT1G66240.1,AT1G66240.3	ATX1	-	T	C	0.0582069	372	6.21555	7.18868e-55
5_16609873	AT5G41520	AT5G41520.1,AT5G41520.2	RPS10B	-	T	C	0.0356541	444	5.02844	7.56362e-55
4_5924337	AT4G09320	AT4G09320.1	NDPK1	+	A	G	0.0292023	324	16.6711	7.56894e-55
5_3298034	AT5G10480	AT5G10480.1,AT5G10480.3,AT5G10480.2	PAS2	-	T	C	0.16886	231	6.85452	9.89666e-55
3_87628	AT3G01280	AT3G01280.1	VDAC1	+	A	G	0.0465357	315	17.4462	1.28267e-54
3_17088679	AT3G46430	AT3G46430.1	AT3G46430	+	A	G	0.123954	237	17.5315	1.42693e-54
5_658310	AT5G02870	AT5G02870.1,AT5G02870.2	RPL4D	+	A	G	0.0376619	317	3.84854	1.44669e-54
3_20562602	AT3G55460	AT3G55460.1	SCL30	+	A	G	0.047891	218	7.68364	1.64377e-54
2_18249498	AT2G44120	AT2G44120.2,AT2G44120.1	RPL7C	-	T	C	0.0300647	279	7.90882	1.65983e-54
2_9943495	AT2G23350	AT2G23350.1	PAB4	+	A	G	0.0977694	469	6.09929	1.76565e-54
2_9320620	AT2G21870	AT2G21870.1,AT2G21870.2	MGP1	-	T	C	0.0309005	373	6.91097	1.92004e-54
2_13877049	AT2G32720	AT2G32720.1,AT2G32720.2	CYTB5-B	-	T	C	0.108787	390	6.86536	2.04782e-54
4_37342	AT4G00100	AT4G00100.1	RPS13B	+	A	G	0.0346805	647	4.63715	2.05898e-54
2_19004408	AT2G46280	AT2G46280.1,AT2G46280.3	TIF3I1	-	T	C	0.056547	282	6.21691	2.4292e-54
5_693821	AT5G02960	AT5G02960.1	RPS23B	-	T	C	0.0134205	433	4.80528	3.11623e-54
3_21996358	AT3G59540	AT3G59540.1	RPL38B	-	T	C	0.0263752	397	18.2869	3.26744e-54
1_21073475	AT1G56280	AT1G56280.1,AT1G56280.2	ATDI19	-	T	C	0.0366896	438	4.31896	3.76526e-54
4_15346268	AT4G31700	AT4G31700.1,AT4G31700.2	RPS6A	-	T	C	0.0253112	242	6.253	3.86619e-54
5_3621091	AT5G11340	AT5G11340.1	AT5G11340	+	A	G	0.208817	180	16.4769	4.26505e-54
3_3673945	AT3G11630	AT3G11630.1	BAS1	+	A	G	0.110966	170	16.8843	4.4901e-54
2_1894761	AT2G05220	AT2G05220.1,AT2G05220.2	RPS17B	-	T	C	0.0588235	362	6.88966	4.77747e-54
5_2824831	AT5G08680	AT5G08680.1	AT5G08680	+	A	G	0.0589496	165	17.8902	5.06882e-54
3_6929294	AT3G19910	AT3G19910.1	BBR	+	A	G	0.15426	172	17.3863	5.13677e-54
1_21380173	AT1G57720	AT1G57720.1,AT1G57720.2	AT1G57720	+	A	G	0.0475817	182	6.77792	5.33471e-54
4_16841779	AT4G35450	AT4G35450.1,AT4G35450.5,AT4G35450.4	AKR2	+	A	G	0.0694143	160	7.79949	5.58115e-54
1_10639813	AT1G30230	AT1G30230.1,AT1G30230.2	AT1G30230	+	A	G	0.0136632	190	7.64431	5.66037e-54
5_17159507	AT5G42790	AT5G42790.1	PAF1	-	T	C	0.0665362	272	5.80844	5.79489e-54
3_5670308	AT3G16640	AT3G16640.1	TCTP	-	T	C	0.0124395	478	4.10529	6.14078e-54
5_14276083	AT5G36230	AT5G36230.1,AT5G36230.2	AT5G36230	+	A	G	0.0536265	261	6.82892	7.51821e-54
1_29206973	AT1G77710	AT1G77710.1	AT1G77710	+	A	G	0.0198319	184	17.0325	8.78453e-54
4_18258369	AT4G39200	AT4G39200.1,AT4G39200.2	RPS25E	+	A	G	0.00865118	203	18.2491	9.58108e-54
1_18218086	AT1G49240	AT1G49240.1	ACT8	+	A	G	0.0310847	188	18.4548	9.9002e-54
2_17460795	AT2G41840	AT2G41840.1	RPS2C	-	T	C	0.0191789	398	4.65015	1.2825e-53
4_6174692	AT4G09800	AT4G09800.1	RPS18A	+	A	G	0.029458	356	6.22224	1.75515e-53
1_1217225	AT1G04480	AT1G04480.1	RPL23C	+	A	G	0.0664726	411	6.26229	1.76462e-53
3_21718517	AT3G58730	AT3G58730.1	VHA-D	-	T	C	0.112771	385	6.91979	1.81302e-53
4_18257849	AT4G39200	AT4G39200.1,AT4G39200.2	RPS25E	+	A	G	0.0130832	433	4.76402	1.87932e-53
2_9320466	AT2G21870	AT2G21870.1,AT2G21870.2	MGP1	-	T	C	0.0262892	286	18.4907	2.94686e-53
3_8475775	AT3G23600	AT3G23600.1,AT3G23600.2	AT3G23600	+	A	G	0.119531	306	17.4822	3.13342e-53
3_3400560	AT3G10860	AT3G10860.1,AT3G10860.2	AT3G10860	+	A	G	0.0306666	363	7.62439	3.51072e-53
2_15170963	AT2G36160	AT2G36160.1	RPS14A	+	A	G	0.0257077	336	5.62615	3.78749e-53
3_4911932	AT3G14600	AT3G14600.1	RPL18AC	+	A	G	0.0537141	269	7.94548	4.61342e-53
3_3778467	AT3G11940	AT3G11940.1,AT3G11940.2	RPS5B	-	T	C	0.0163707	295	5.2346	4.65421e-53
2_15594323	AT2G37120	AT2G37120.1	S1FA2	-	T	C	0.052423	172	17.6566	5.95896e-53
5_5361033	AT5G16390	AT5G16390.1,AT5G16390.2	BCCP1	-	T	C	0.162544	184	7.89882	7.01949e-53
3_20223346	AT3G54640	AT3G54640.1	TSA1	-	T	C	0.0451108	173	6.19129	7.43369e-53
4_11266413	AT4G21105	AT4G21105.1,AT4G21105.3	AT4G21105	+	A	G	0.0173123	345	6.71883	8.71659e-53
3_5802882	AT3G17020	AT3G17020.1,AT3G17020.2	AT3G17020	-	T	C	0.019665	216	5.80549	1.34502e-52
3_16164046	AT3G44590	AT3G44590.1,AT3G44590.2	RPP2D	+	A	G	0.0488481	335	5.42835	1.95161e-52
2_8965048	AT2G20820	AT2G20820.1,AT2G20820.2	AT2G20820	+	A	G	0.0325235	419	5.51939	2.39975e-52
4_16338016	AT4G34110	AT4G34110.1	PAB2	+	A	G	0.0297663	200	7.59759	2.67581e-52
5_16315427	AT5G40770	AT5G40770.1	PHB3	-	T	C	0.11059	283	6.22432	3.46033e-52
4_16171846	AT4G33680	AT4G33680.1	DAP	-	T	C	0.137845	165	17.1861	3.78577e-52
2_18250254	AT2G44120	AT2G44120.2,AT2G44120.1	RPL7C	-	T	C	0.0200924	261	5.40336	4.33212e-52
4_18148741	AT4G38920	AT4G38920.1,AT4G38920.2	VHA-C3	+	A	G	0.0289951	438	4.1213	4.35464e-52
5_3259311	AT5G10360	AT5G10360.1,AT5G10360.2	RPS6B	-	T	C	0.0182457	400	17.8237	4.45623e-52
1_18236714	AT1G49300	AT1G49300.1,AT1G49300.2	RABG3E	+	A	G	0.0463804	189	7.76046	4.58193e-52
4_9773234	AT4G17520	AT4G17520.1	AT4G17520	+	A	G	0.0820034	334	5.51604	5.30626e-52
4_18113415	AT4G38800	AT4G38800.1	MTN1	-	T	C	0.0528757	171	5.82513	5.6188e-52
2_12960556	AT2G30410	AT2G30410.1,AT2G30410.2,AT2G30410.3	TFCA	+	A	G	0.12846	181	18.1463	5.62833e-52
1_16268087	AT1G43170	AT1G43170.1,AT1G43170.4	ARP1	+	A	G	0.0166303	244	4.93541	7.09851e-52
5_3792529	AT5G11770	AT5G11770.1	AT5G11770	-	T	C	0.0218054	186	6.09036	1.08023e-51
5_3258794	AT5G10360	AT5G10360.1,AT5G10360.2	RPS6B	-	T	C	0.0331597	331	6.20648	1.49327e-51
2_8515809	AT2G19750	AT2G19750.1	RPS30C	+	A	G	0.0229219	190	17.7845	1.50668e-51
5_6090566	AT5G18380	AT5G18380.1,AT5G18380.3,AT5G18380.2	RPS16C	-	T	C	0.00825826	253	4.58666	2.02428e-51
5_20693021	AT5G50850	AT5G50850.1	PDH2	+	A	G	0.0529091	291	6.82486	2.02428e-51
5_24281326	AT5G60360	AT5G60360.1,AT5G60360.3,AT5G60360.2	ALEU	+	A	G	0.0277581	313	4.65598	2.02996e-51
5_26062448	AT5G65220	AT5G65220.1	RPL29	+	A	G	0.174727	224	4.50671	3.46668e-51
5_5865390	AT5G17770	AT5G17770.1	CBR1	-	T	C	0.0258074	179	6.62431	3.75207e-51
4_6174627	AT4G09800	AT4G09800.1	RPS18A	+	A	G	0.0199796	255	6.14702	4.05357e-51
4_16337870	AT4G34110	AT4G34110.1	PAB2	+	A	G	0.0328392	206	6.59411	4.08522e-51
3_19398150	AT3G52300	AT3G52300.1,AT3G52300.2	ATPQ	+	A	G	0.0563256	573	7.89022	4.09814e-51
4_8500522	AT4G14800	AT4G14800.1,AT4G14800.2	PBD2	+	A	G	0.0791527	497	5.30732	4.12331e-51
2_16475626	AT2G39460	AT2G39460.1,AT2G39460.2	RPL23AA	+	A	G	0.0226376	327	4.20979	5.1993e-51
3_9065215	AT3G24830	AT3G24830.1	RPL13AB	+	A	G	0.022744	402	4.46734	7.17461e-51
2_13383535	AT2G31390	AT2G31390.1	AT2G31390	-	T	C	0.067323	212	17.4476	7.41865e-51
3_6998505	AT3G20050	AT3G20050.1	CCT1	-	T	C	0.0706166	205	4.16063	7.77747e-51
1_19475201	AT1G52300	AT1G52300.1	RPL37B	-	T	C	0.0165401	257	5.71635	8.47252e-51
3_9269944	AT3G25520	AT3G25520.1,AT3G25520.2	ATL5	-	T	C	0.0203288	277	7.73995	8.86994e-51
2_11819456	AT2G27720	AT2G27720.1,AT2G27720.4,AT2G27720.3,AT2G27720.2	RPP2A	+	A	G	0.0337295	193	6.08502	9.15959e-51
1_11460193	AT1G31910	AT1G31910.1,AT1G31910.2	AT1G31910	+	A	G	0.0928333	250	4.04321	9.79287e-51
5_23515556	AT5G58110	AT5G58110.1	AT5G58110	+	A	G	0.0368488	174	17.4915	1.00813e-50
1_10769113	AT1G30450	AT1G30450.1,AT1G30450.4	CCC1	+	A	G	0.322851	154	5.82961	1.31556e-50
4_251168	AT4G00585	AT4G00585.1	AT4G00585	-	T	C	0.0411079	187	6.67839	1.40034e-50
5_4472635	AT5G13850	AT5G13850.1	NACA3	+	A	G	0.0786966	256	6.81745	1.40803e-50
1_19128468	AT1G51590	AT1G51590.1,AT1G51590.2	MNS1	-	T	C	0.347731	475	3.29159	1.52908e-50
2_12015731	AT2G28190	AT2G28190.1	CSD2	+	A	G	0.0557339	191	6.05577	1.59285e-50
1_28855174	AT1G76860	AT1G76860.1	LSM3B	-	T	C	0.0655468	558	4.49794	1.60639e-50
5_9874019	AT5G27850	AT5G27850.1,AT5G27850.2	RPL18C	+	A	G	0.0109919	252	5.68967	1.80614e-50
4_13554789	AT4G27000	AT4G27000.1	RBP45C	-	T	C	0.118464	145	17.0578	1.87358e-50
5_23620576	AT5G58420	AT5G58420.1	RPS4D	+	A	G	0.042875	377	5.74379	1.88948e-50
4_15209330	AT4G31340	AT4G31340.1,AT4G31340.2	AT4G31340	+	A	G	0.0494434	151	17.9937	2.04735e-50
5_5866130	AT5G17770	AT5G17770.1	CBR1	-	T	C	0.0324121	258	3.95031	2.58575e-50
2_95445	AT2G01140	AT2G01140.1	FBA3	-	T	C	0.0259478	347	4.31553	3.16846e-50
4_18287139	AT4G39300	AT4G39300.1,AT4G39300.2	AT4G39300	+	A	G	0.120117	329	7.87398	3.50794e-50
3_1604056	AT3G05530	AT3G05530.1	RPT5A	+	A	G	0.0614412	243	5.06847	3.80939e-50
1_21379885	AT1G57720	AT1G57720.1,AT1G57720.2	AT1G57720	+	A	G	0.092662	519	2.97802	5.98914e-50
5_534390	AT5G02450	AT5G02450.1	RPL36C	+	A	G	0.0340568	284	6.10287	6.83616e-50
1_23658058	AT1G63770	AT1G63770.5,AT1G63770.7,AT1G63770.3,AT1G63770.2,AT1G63770.4,AT1G63770.1	AT1G63770	-	T	C	0.138321	318	17.1456	7.0892e-50
2_13438196	AT2G31570	AT2G31570.1	GPX2	-	T	C	0.0387763	199	7.76744	7.65632e-50
4_10303181	AT4G18730	AT4G18730.1	RPL11B	+	A	G	0.0360263	268	7.80038	7.73518e-50
4_16549924	AT4G34670	AT4G34670.1	RPS3AB	+	A	G	0.0149408	173	7.56705	9.09698e-50
1_2463316	AT1G07940	AT1G07940.1,AT1G07940.2,AT1G07940.3,AT1G07940.4	A3	-	T	C	0.13672	1203	3.04076	1.01063e-49
3_19810264	AT3G53430	AT3G53430.1	RPL12B	-	T	C	0.0579014	1097	2.95937	1.05387e-49
2_133956	AT2G01250	AT2G01250.1,AT2G01250.2	RPL7B	-	T	C	0.0209091	627	5.08782	1.20224e-49
5_22422986	AT5G55290	AT5G55290.1,AT5G55290.2,AT5G55290.3	VHA-E1	-	T	C	0.248014	281	7.907	1.56184e-49
3_17637343	AT3G47810	AT3G47810.1,AT3G47810.2,AT3G47810.3	VPS29	-	T	C	0.0718916	244	5.76786	1.68498e-49
5_693281	AT5G02960	AT5G02960.1	RPS23B	-	T	C	0.0323048	290	7.79043	2.18441e-49
3_17453647	AT3G47370	AT3G47370.1,AT3G47370.2,AT3G47370.3	RPS20B	-	T	C	0.052509	248	17.6332	2.25881e-49
4_18213737	AT4G39080	AT4G39080.1	VHA-A3	+	A	G	0.163649	470	3.45918	2.27978e-49
3_5802612	AT3G17020	AT3G17020.1,AT3G17020.2	AT3G17020	-	T	C	0.107169	148	7.68472	2.44041e-49
4_10303090	AT4G18730	AT4G18730.1	RPL11B	+	A	G	0.0283902	376	4.94497	3.34598e-49
5_2870331	AT5G09225	AT5G09225.1	AT5G09225	-	T	C	0.146561	260	4.79889	4.08077e-49
3_2917849	AT3G09500	AT3G09500.1	RPL35A	+	A	G	0.0231372	263	4.72275	4.83079e-49
1_2408457	AT1G07770	AT1G07770.1,AT1G07770.2,AT1G07770.3	RPS15AA	-	T	C	0.0147249	205	17.5417	5.57717e-49
3_2252294	AT3G07110	AT3G07110.1,AT3G07110.2	RPL13AA	+	A	G	0.0113568	190	16.7379	7.37382e-49
1_18929403	AT1G51070	AT1G51070.1,AT1G51070.2	BHLH115	+	A	G	0.0622151	232	6.16805	8.24334e-49
1_18216685	AT1G49240	AT1G49240.1	ACT8	+	A	G	0.0214719	248	7.6431	8.34013e-49
2_9237443	AT2G21580	AT2G21580.1,AT2G21580.2	RPS25B	+	A	G	0.0368796	373	6.76836	8.72492e-49
2_19530211	AT2G47610	AT2G47610.1	RPL7AA	+	A	G	0.0277485	368	3.97653	8.89331e-49
3_19225512	AT3G51840	AT3G51840.1	ACX4	-	T	C	0.13613	159	7.72752	9.0319e-49
1_5203757	AT1G15120	AT1G15120.2,AT1G15120.1	AT1G15120	+	A	G	0.0299029	462	17.0301	9.16799e-49
5_534082	AT5G02450	AT5G02450.1	RPL36C	+	A	G	0.00913437	214	5.55656	9.75277e-49
1_6223875	AT1G18080	AT1G18080.1	RACK1A	+	A	G	0.018413	168	17.5458	1.0063e-48
3_20942620	AT3G56490	AT3G56490.1	HIT3	+	A	G	0.0839783	727	2.97835	1.10778e-48
1_1217263	AT1G04480	AT1G04480.1	RPL23C	+	A	G	0.0579037	237	17.7876	1.17777e-48
3_17638926	AT3G47810	AT3G47810.1,AT3G47810.2,AT3G47810.3	VPS29	-	T	C	0.0429265	274	5.69045	1.20561e-48
5_12591386	AT5G33320	AT5G33320.1	PPT1	+	A	G	0.0447544	154	16.8399	1.46758e-48
5_3258870	AT5G10360	AT5G10360.1,AT5G10360.2	RPS6B	-	T	C	0.0193992	257	4.354	1.54242e-48
2_1528332	AT2G04390	AT2G04390.1	RPS17A	+	A	G	0.0936854	408	5.63603	1.58154e-48
2_7566383	AT2G17420	AT2G17420.1,AT2G17420.2	NTRA	+	A	G	0.0470281	144	17.5789	1.6837e-48
5_18503829	AT5G45620	AT5G45620.1,AT5G45620.2	RPN9A	+	A	G	0.247247	247	6.7895	1.70569e-48
2_11763763	AT2G27530	AT2G27530.1,AT2G27530.2	RPL10AB	-	T	C	0.0142869	175	6.00118	1.87497e-48
3_3400495	AT3G10860	AT3G10860.1,AT3G10860.2	AT3G10860	+	A	G	0.0261973	605	7.5911	1.87561e-48
5_20342749	AT5G50000	AT5G50000.1,AT5G50000.2	AT5G50000	-	T	C	0.291489	137	17.1126	1.89583e-48
2_14144106	AT2G33370	AT2G33370.1,AT2G33370.2	RPL23C	-	T	C	0.0192678	210	7.63342	2.326e-48
3_5908758	AT3G17300	AT3G17300.1,AT3G17300.2	AT3G17300	+	A	G	0.144084	151	15.7827	2.46663e-48
3_1083160	AT3G04120	AT3G04120.1	GAPC1	+	A	G	0.0195611	394	4.82449	2.55681e-48
3_2606269	AT3G08580	AT3G08580.1,AT3G08580.2	AAC1	-	T	C	0.0176268	369	4.37491	2.64538e-48
5_9836980	AT5G27770	AT5G27770.1	RPL22C	+	A	G	0.0156733	299	5.99965	2.8281e-48
1_21430068	AT1G57860	AT1G57860.1	RPL21F	-	T	C	0.087934	309	17.7936	3.17043e-48
2_13383538	AT2G31390	AT2G31390.1	AT2G31390	-	T	C	0.0473876	156	17.9281	3.20097e-48
5_25749639	AT5G64400	AT5G64400.1,AT5G64400.2,AT5G64400.3	AT5G64400	+	A	G	0.0228721	524	4.53603	3.89101e-48
5_8064305	AT5G23900	AT5G23900.1	RPL13D	-	T	C	0.0361431	298	6.06812	3.96025e-48
5_16610030	AT5G41520	AT5G41520.1,AT5G41520.2	RPS10B	-	T	C	0.0228587	257	6.10839	4.18909e-48
3_16472003	AT3G45030	AT3G45030.1	RPS20A	-	T	C	0.0371764	405	16.8417	4.64886e-48
1_1163373	AT1G04340	AT1G04340.1	AT1G04340	-	T	C	0.120031	154	6.09214	5.68398e-48
5_19137644	AT5G47120	AT5G47120.1	BI-1	+	A	G	0.0432624	183	7.63612	6.21253e-48
5_2203796	AT5G07090	AT5G07090.1,AT5G07090.2	RPS4B	+	A	G	0.019271	212	6.61236	6.54684e-48
1_29206969	AT1G77710	AT1G77710.1	AT1G77710	+	A	G	0.0281724	232	7.66864	6.92928e-48
1_4050650	AT1G12000	AT1G12000.1	PFP-BETA1	-	T	C	0.0726155	437	3.22052	8.09661e-48
1_5711825	AT1G16700	AT1G16700.1	AT1G16700	+	A	G	0.125808	214	17.6392	8.86651e-48
3_19369525	AT3G52220	AT3G52220.1	AT3G52220	-	T	C	0.335756	231	3.83122	8.86937e-48
5_4935795	AT5G15200	AT5G15200.1,AT5G15200.2	RPS9B	-	T	C	0.0152802	331	6.72636	9.01713e-48
1_6949212	AT1G20050	AT1G20050.1	HYD1	+	A	G	0.0940939	513	3.04803	9.07035e-48
5_25667540	AT5G64140	AT5G64140.1	RPS28C	-	T	C	0.0251344	304	6.61957	9.13437e-48
2_15619690	AT2G37190	AT2G37190.1	RPL12A	-	T	C	0.0221259	245	4.16615	1.22733e-47
1_9206697	AT1G26630	AT1G26630.1,AT1G26630.2	ELF5A-2	+	A	G	0.0281052	689	3.51657	1.2694e-47
5_19092076	AT5G47030	AT5G47030.1	AT5G47030	+	A	G	0.05442	205	7.66897	1.28394e-47
3_19543736	AT3G52730	AT3G52730.1,AT3G52730.2	AT3G52730	-	T	C	0.0246309	317	5.91855	1.6026e-47
1_11411554	AT1G31812	AT1G31812.1	ACBP6	-	T	C	0.0121301	371	4.63552	1.64321e-47
5_3259670	AT5G10360	AT5G10360.1,AT5G10360.2	RPS6B	-	T	C	0.0161163	368	5.24327	1.95448e-47
2_8788785	AT2G20360	AT2G20360.1	AT2G20360	+	A	G	0.052446	461	4.48856	2.12644e-47
3_4562160	AT3G13860	AT3G13860.1	HSP60-3A	-	T	C	0.310094	427	3.31364	2.22322e-47
5_24290443	AT5G60390	AT5G60390.1,AT5G60390.2,AT5G60390.3	A3	+	A	G	0.0743613	2215	4.51254	2.35972e-47
4_12974356	AT4G25370	AT4G25370.1	AT4G25370	+	A	G	0.122627	239	7.79302	2.39747e-47
4_6733033	AT4G11010	AT4G11010.1	NDPK3	-	T	C	0.0279444	424	5.91023	2.92553e-47
2_9071661	AT2G21170	AT2G21170.1,AT2G21170.2	TIM	-	T	C	0.0391223	189	5.5715	2.95545e-47
5_9255597	AT5G26360	AT5G26360.1	CCT3	-	T	C	0.0595578	167	15.8379	3.12223e-47
3_367295	AT3G02090	AT3G02090.1,AT3G02090.2	MPPBETA	+	A	G	0.0595665	382	3.76262	3.64586e-47
3_23228234	AT3G62810	AT3G62810.1	AT3G62810	+	A	G	0.118907	222	7.69914	3.70288e-47
1_18218126	AT1G49240	AT1G49240.1	ACT8	+	A	G	0.0303272	152	6.08084	3.93524e-47
5_6786501	AT5G20080	AT5G20080.1	CBR2	+	A	G	0.0550085	162	7.51689	4.19928e-47
1_25262481	AT1G67430	AT1G67430.1,AT1G67430.2	RPL17B	+	A	G	0.0211088	431	5.49516	4.77161e-47
3_2616426	AT3G08610	AT3G08610.1	AT3G08610	-	T	C	0.0227933	298	6.61066	5.31447e-47
3_6969501	AT3G20000	AT3G20000.1,AT3G20000.2	TOM40-1	+	A	G	0.0708615	241	4.41422	5.69274e-47
5_19623977	AT5G48412	AT5G48412.1	AT5G48412	-	T	C	0.0534829	205	4.07266	5.82342e-47
4_10035908	AT4G18100	AT4G18100.1	RPL32A	-	T	C	0.0182038	436	6.66658	6.13802e-47
4_13594448	AT4G27090	AT4G27090.1	RPL14B	-	T	C	0.00800956	228	5.00834	6.51887e-47
1_404268	AT1G02140	AT1G02140.1	MEE63	-	T	C	0.0255215	312	5.27125	6.74394e-47
5_3259236	AT5G10360	AT5G10360.1,AT5G10360.2	RPS6B	-	T	C	0.0124752	233	6.59463	6.91348e-47
5_19328655	AT5G47700	AT5G47700.1,AT5G47700.2	RPP1C	-	T	C	0.0202062	917	3.68845	7.80194e-47
2_7548094	AT2G17360	AT2G17360.1,AT2G17360.2	RPS4A	+	A	G	0.0297104	278	7.6207	8.40227e-47
3_6453662	AT3G18740	AT3G18740.1	RPL30C	+	A	G	0.0181135	347	6.02802	8.69053e-47
5_16807698	AT5G42020	AT5G42020.1,AT5G42020.3,AT5G42020.2	MED37F	-	T	C	0.0355718	205	7.65584	9.27117e-47
2_17460785	AT2G41840	AT2G41840.1	RPS2C	-	T	C	0.00942912	202	4.49197	9.8006e-47
3_19506059	AT3G52590	AT3G52590.1	RPL40B	+	A	G	0.0126739	359	5.51751	1.08695e-46
1_2809922	AT1G08780	AT1G08780.1	AIP3	-	T	C	0.247818	142	16.7209	1.15554e-46
3_1605358	AT3G05530	AT3G05530.1	RPT5A	+	A	G	0.0571496	243	5.07979	1.20361e-46
1_21144198	AT1G56450	AT1G56450.1	PBG1	+	A	G	0.0985825	306	18.6144	1.3258e-46
4_13554942	AT4G27000	AT4G27000.1	RBP45C	-	T	C	0.0352603	147	7.54298	1.52043e-46
3_9672981	AT3G26420	AT3G26420.1	RZ1A	+	A	G	0.0540541	236	6.59008	2.00336e-46
5_26618192	AT5G66680	AT5G66680.1	OST48	-	T	C	0.0473306	250	4.69314	2.14371e-46
4_15470346	AT4G31985	AT4G31985.1	RPL39C	+	A	G	0.0172592	217	17.2123	2.15742e-46
4_16172325	AT4G33680	AT4G33680.1	DAP	-	T	C	0.164969	324	3.5778	2.58726e-46
5_3259987	AT5G10360	AT5G10360.1,AT5G10360.2	RPS6B	-	T	C	0.0106216	243	7.49652	2.59336e-46
1_12370668	AT1G34030	AT1G34030.1	RPS18A	-	T	C	0.0172337	155	16.3852	2.7383e-46
2_14050048	AT2G33150	AT2G33150.1	PED1	-	T	C	0.0525492	302	3.60467	2.82056e-46
1_5472369	AT1G15930	AT1G15930.1,AT1G15930.2	RPS12A	+	A	G	0.0261311	417	6.55109	3.72864e-46
1_3107605	AT1G09590	AT1G09590.1	RPL21A	+	A	G	0.0329304	237	6.03243	3.78501e-46
5_17194522	AT5G42890	AT5G42890.1	ATSCP2	-	T	C	0.0291363	168	7.59963	4.35174e-46
3_3624542	AT3G11510	AT3G11510.1	RPS14B	-	T	C	0.0646841	559	4.02342	5.01871e-46
1_28627102	AT1G76300	AT1G76300.1	SMD3A	+	A	G	0.106778	230	16.6032	5.49343e-46
4_14486249	AT4G29480	AT4G29480.1	AT4G29480	-	T	C	0.0390977	208	6.60076	5.96147e-46
1_29346755	AT1G78040	AT1G78040.1,AT1G78040.2,AT1G78040.3	AT1G78040	+	A	G	0.023961	275	3.08917	6.19304e-46
2_11049357	AT2G25910	AT2G25910.1,AT2G25910.2	AT2G25910	-	T	C	0.164009	288	7.78561	6.32778e-46
3_1167761	AT3G04400	AT3G04400.1,AT3G04400.2	RPL23C	+	A	G	0.00616157	189	5.90745	6.7141e-46
3_364083	AT3G02080	AT3G02080.1	RPS19A	-	T	C	0.0350622	217	7.66177	8.0013e-46
2_13181460	AT2G30970	AT2G30970.1,AT2G30970.2	ASP1	+	A	G	0.0409079	155	7.48256	8.04242e-46
1_28414395	AT1G75660	AT1G75660.1	XRN3	+	A	G	0.212526	207	4.10665	8.29589e-46
3_19690435	AT3G53110	AT3G53110.1	RH38	+	A	G	0.101665	171	7.57181	8.99881e-46
5_23271426	AT5G57440	AT5G57440.1	GPP2	-	T	C	0.278557	139	7.62319	9.09062e-46
2_7837390	AT2G18020	AT2G18020.1	RPL8A	+	A	G	0.0230009	447	2.73218	1.0238e-45
5_20155475	AT5G49650	AT5G49650.1,AT5G49650.2	XK-2	+	A	G	0.254766	147	5.67736	1.43647e-45
1_28855522	AT1G76860	AT1G76860.1	LSM3B	-	T	C	0.0222632	181	16.229	1.50561e-45
3_20594416	AT3G55520	AT3G55520.1,AT3G55520.2,AT3G55520.3	FKBP20-1	+	A	G	0.156807	220	4.67593	1.70673e-45
1_1189489	AT1G04410	AT1G04410.1	MDH1	-	T	C	0.0114618	292	4.12968	1.96051e-45
5_15990902	AT5G39950	AT5G39950.1	TRX2	-	T	C	0.0856385	226	16.3003	2.02362e-45
5_1389638	AT5G04800	AT5G04800.1,AT5G04800.2,AT5G04800.3,AT5G04800.4	RPS17D	+	A	G	0.0335667	163	6.47927	2.2841e-45
3_19660786	AT3G53020	AT3G53020.1	RPL24B	-	T	C	0.0299558	298	5.0129	2.34819e-45
5_14900475	AT5G37510	AT5G37510.1,AT5G37510.2	EMB1467	+	A	G	0.0986181	157	16.6883	2.47938e-45
4_9773179	AT4G17520	AT4G17520.1	AT4G17520	+	A	G	0.0360194	156	17.0782	2.57199e-45
5_1389666	AT5G04800	AT5G04800.1,AT5G04800.2,AT5G04800.3,AT5G04800.4	RPS17D	+	A	G	0.0472626	221	7.60136	2.98499e-45
5_16230825	AT5G40510	AT5G40510.2,AT5G40510.1	AT5G40510	+	A	G	0.0901312	158	7.54656	3.03711e-45
1_2439527	AT1G07890	AT1G07890.1,AT1G07890.6	APX1	+	A	G	0.0179107	245	5.53895	3.14906e-45
2_14377941	AT2G34040	AT2G34040.1,AT2G34040.3	AT2G34040	-	T	C	0.244444	209	7.67083	3.72504e-45
1_2460613	AT1G07930	AT1G07930.1,AT1G07930.2	A3	+	A	G	0.0545977	190	17.7434	3.77285e-45
4_13594895	AT4G27090	AT4G27090.1	RPL14B	-	T	C	0.0143619	579	5.09173	5.35203e-45
4_8572269	AT4G15000	AT4G15000.1	RPL27C	+	A	G	0.0184273	172	16.9253	5.5103e-45
1_19104562	AT1G51510	AT1G51510.1	Y14	-	T	C	0.0315126	165	7.38392	6.14022e-45
3_19397848	AT3G52300	AT3G52300.1,AT3G52300.2	ATPQ	+	A	G	0.0111414	192	5.27384	6.53114e-45
1_29924818	AT1G79550	AT1G79550.1,AT1G79550.2	PGK	-	T	C	0.0414873	607	3.36873	7.44049e-45
5_2626030	AT5G08160	AT5G08160.1,AT5G08160.2	ATPK3	-	T	C	0.112317	176	7.63291	7.70448e-45
5_554298	AT5G02500	AT5G02500.1,AT5G02500.2	MED37E	-	T	C	0.0251397	657	2.74507	7.81064e-45
3_39252	AT3G01120	AT3G01120.1	CGS1	-	T	C	0.073277	269	4.87515	9.60139e-45
2_8807890	AT2G20420	AT2G20420.1	AT2G20420	+	A	G	0.0610572	283	17.2494	1.33037e-44
1_21356122	AT1G57660	AT1G57660.1	RPL21F	+	A	G	0.0158394	269	5.94908	1.37398e-44
1_10640525	AT1G30230	AT1G30230.1,AT1G30230.2	AT1G30230	+	A	G	0.0360167	370	6.65859	1.39781e-44
1_27840896	AT1G74030	AT1G74030.1	ENO1	-	T	C	0.0407204	208	4.89428	1.47965e-44
2_17461354	AT2G41840	AT2G41840.1	RPS2C	-	T	C	0.0344501	400	4.17498	1.73789e-44
1_5166362	AT1G14980	AT1G14980.1,AT1G14980.2	CPN10	-	T	C	0.0212135	322	5.09322	1.82086e-44
3_2615653	AT3G08610	AT3G08610.1	AT3G08610	-	T	C	0.0406274	373	6.50226	1.96242e-44
5_25749781	AT5G64400	AT5G64400.1,AT5G64400.2,AT5G64400.3	AT5G64400	+	A	G	0.0238265	335	6.54371	2.06644e-44
2_13412205	AT2G31490	AT2G31490.1	AT2G31490	+	A	G	0.0217773	372	4.16908	2.3581e-44
5_19091878	AT5G47030	AT5G47030.1	AT5G47030	+	A	G	0.0276631	201	18.5475	2.35983e-44
5_7436070	AT5G22440	AT5G22440.1,AT5G22440.2	RPL10AC	-	T	C	0.0365854	282	4.28467	2.36557e-44
3_2917664	AT3G09500	AT3G09500.1	RPL35A	+	A	G	0.0105732	261	5.47351	3.78609e-44
4_15669517	AT4G32470	AT4G32470.1,AT4G32470.2	QCR7-1	-	T	C	0.0579811	251	7.64281	3.84124e-44
5_25749703	AT5G64400	AT5G64400.1,AT5G64400.2,AT5G64400.3	AT5G64400	+	A	G	0.0121584	226	6.49536	4.80852e-44
2_223206	AT2G01490	AT2G01490.1,AT2G01490.2	PAHX	+	A	G	0.150853	221	7.69487	4.82265e-44
2_18205472	AT2G43970	AT2G43970.1,AT2G43970.2	LARP6B	-	T	C	0.0670312	331	6.58486	5.09368e-44
3_23037605	AT3G62250	AT3G62250.1	RPS27AC	+	A	G	0.0135364	152	7.43326	5.74217e-44
5_26307051	AT5G65750	AT5G65750.1	AT5G65750	+	A	G	0.238882	188	5.57142	5.74217e-44
1_27109736	AT1G72020	AT1G72020.1	AT1G72020	-	T	C	0.0233674	443	4.65314	6.0265e-44
1_5402225	AT1G15690	AT1G15690.1,AT1G15690.2	AVP1	+	A	G	0.0271868	138	6.50849	6.29237e-44
5_5379770	AT5G16470	AT5G16470.1,AT5G16470.2	AT5G16470	+	A	G	0.0370065	314	3.01726	7.12066e-44
4_15669641	AT4G32470	AT4G32470.1,AT4G32470.2	QCR7-1	-	T	C	0.0231031	285	18.1488	8.08137e-44
3_19506089	AT3G52590	AT3G52590.1	RPL40B	+	A	G	0.00815143	239	5.04397	9.42887e-44
5_13711948	AT5G35530	AT5G35530.1	RPS3C	-	T	C	0.0206398	220	17.9956	1.20531e-43
1_3121923	AT1G09640	AT1G09640.1	AT1G09640	+	A	G	0.0448158	236	4.91655	1.22985e-43
1_17969062	AT1G48600	AT1G48600.2,AT1G48600.1	NMT2	+	A	G	0.0441086	216	17.3784	1.23899e-43
4_14563137	AT4G29735	AT4G29735.1,AT4G29735.2	AT4G29735	-	T	C	0.0321675	149	16.8774	1.42845e-43
2_7547816	AT2G17360	AT2G17360.1,AT2G17360.2	RPS4A	+	A	G	0.0255446	265	6.52978	1.50935e-43
3_3400504	AT3G10860	AT3G10860.1,AT3G10860.2	AT3G10860	+	A	G	0.0162289	359	5.90944	1.69604e-43
1_6223858	AT1G18080	AT1G18080.1	RACK1A	+	A	G	0.0172693	181	7.49072	1.82646e-43
5_5059430	AT5G15550	AT5G15550.1,AT5G15550.2	AT5G15550	-	T	C	0.258575	294	2.87251	2.6928e-43
5_9808073	AT5G27700	AT5G27700.1	RPS21C	-	T	C	0.0355761	331	7.55594	2.71287e-43
3_4911271	AT3G14600	AT3G14600.1	RPL18AC	+	A	G	0.0469751	667	4.72327	2.81128e-43
1_4889447	AT1G14320	AT1G14320.1,AT1G14320.2	RPL10A	+	A	G	0.0101206	146	7.36381	2.85581e-43
1_29305085	AT1G77940	AT1G77940.1	RPL30B	-	T	C	0.0126209	347	4.48736	3.1493e-43
2_15171121	AT2G36160	AT2G36160.1	RPS14A	+	A	G	0.0276627	247	5.48233	3.6351e-43
4_18257834	AT4G39200	AT4G39200.1	RPS25E	+	A	G	0.00976761	269	6.42252	4.12435e-43
1_8263417	AT1G23290	AT1G23290.1	RPL27AB	+	A	G	0.0357726	263	7.60596	4.39658e-43
2_7989679	AT2G18400	AT2G18400.1	AT2G18400	-	T	C	0.221729	200	16.4948	4.70208e-43
5_19789272	AT5G48810	AT5G48810.1	CYTB5-D	-	T	C	0.0341556	180	15.9505	5.12492e-43
4_2490004	AT4G04910	AT4G04910.1	NSF	-	T	C	0.155973	141	5.58088	5.14008e-43
5_4978633	AT5G15320	AT5G15320.1,AT5G15320.2	AT5G15320	+	A	G	0.0503876	468	7.54206	5.43957e-43
2_17460782	AT2G41840	AT2G41840.1	RPS2C	-	T	C	0.0126641	275	5.44297	6.10916e-43
5_18664566	AT5G46020	AT5G46020.1	AT5G46020	-	T	C	0.0535982	286	5.48079	6.1101e-43
1_27849986	AT1G74060	AT1G74060.1	RPL6B	-	T	C	0.0469194	198	7.598	7.49618e-43
3_6453848	AT3G18740	AT3G18740.1	RPL30C	+	A	G	0.0455819	309	6.54824	9.22569e-43
1_10640209	AT1G30230	AT1G30230.1,AT1G30230.2	AT1G30230	+	A	G	0.0216651	280	5.53405	1.02014e-42
5_19772425	AT5G48760	AT5G48760.1,AT5G48760.2	RPL13AD	-	T	C	0.0447527	200	3.92754	1.23968e-42
4_16370110	AT4G34180	AT4G34180.1	AT4G34180	-	T	C	0.0354104	258	7.60119	1.33594e-42
1_29304906	AT1G77940	AT1G77940.1	RPL30B	-	T	C	0.00774175	165	16.1935	1.41992e-42
1_22358202	AT1G60730	AT1G60730.1,AT1G60730.2	AT1G60730	-	T	C	0.186235	276	6.60478	1.45184e-42
3_19892084	AT3G53670	AT3G53670.1,AT3G53670.2	AT3G53670	+	A	G	0.0988746	123	17.2779	1.57152e-42
5_10070260	AT5G28060	AT5G28060.1	RPS24B	-	T	C	0.0174053	282	5.49835	1.89547e-42
1_9527853	AT1G27435	AT1G27435.1	AT1G27435	-	T	C	0.0569307	138	16.3603	1.93721e-42
4_16403457	AT4G34265	AT4G34265.2,AT4G34265.1,AT4G34265.3	AT4G34265	+	A	G	0.10496	273	5.00294	2.01803e-42
1_20026441	AT1G53645	AT1G53645.1	AT1G53645	-	T	C	0.192519	175	5.20095	2.18569e-42
3_2823986	AT3G09200	AT3G09200.1,AT3G09200.2	RPP0B	-	T	C	0.0130469	232	5.00939	3.39962e-42
2_10183158	AT2G23930	AT2G23930.1,AT2G23930.2	SNRNP-G	+	A	G	0.078673	166	5.50224	3.54299e-42
4_13468785	AT4G26710	AT4G26710.1,AT4G26710.2	VHA-E2	+	A	G	0.0195871	148	7.32341	3.86675e-42
1_9172126	AT1G26550	AT1G26550.1	AT1G26550	+	A	G	0.0366765	648	4.15726	3.94708e-42
1_19325394	AT1G51980	AT1G51980.1,AT1G51980.2	AT1G51980	-	T	C	0.0644697	403	2.87393	4.29752e-42
3_23037322	AT3G62250	AT3G62250.1	RPS27AC	+	A	G	0.0117156	247	5.42644	4.49766e-42
5_22350479	AT5G55070	AT5G55070.1	AT5G55070	+	A	G	0.0878553	170	17.009	5.71557e-42
3_22251333	AT3G60210	AT3G60210.1	AT3G60210	-	T	C	0.273885	129	7.48891	5.79289e-42
2_9237436	AT2G21580	AT2G21580.1,AT2G21580.2	RPS25B	+	A	G	0.0265808	293	18.4613	7.62929e-42
3_19810180	AT3G53430	AT3G53430.1	RPL12B	-	T	C	0.019228	394	4.20188	9.21207e-42
3_19866858	AT3G53580	AT3G53580.1	DAPF	+	A	G	0.0643863	160	6.43657	9.72531e-42
1_29796460	AT1G79210	AT1G79210.1,AT1G79210.2,AT1G79210.3	PAB2	-	T	C	0.0571306	133	17.7885	1.06953e-41
1_17321550	AT1G47260	AT1G47260.1	GAMMACA2	-	T	C	0.017449	142	7.29959	1.1224e-41
5_21760346	AT5G53560	AT5G53560.1	CYTB5-E	+	A	G	0.0256319	216	6.45884	1.15092e-41
5_3035169	AT5G09770	AT5G09770.1	AT5G09770	-	T	C	0.224138	143	17.2114	1.17783e-41
5_13765374	AT5G35590	AT5G35590.1	PAA1	-	T	C	0.0392438	137	16.6107	1.32064e-41
3_20562538	AT3G55460	AT3G55460.1	SCL30	+	A	G	0.0678255	199	16.8869	1.45732e-41
1_19854861	AT1G53240	AT1G53240.1	mMDH1	-	T	C	0.0365655	224	5.2242	1.57302e-41
1_9376229	AT1G27000	AT1G27000.1	AT1G27000	+	A	G	0.135815	405	4.42852	1.76984e-41
5_6583068	AT5G19510	AT5G19510.1	AT5G19510	-	T	C	0.00815473	156	17.9674	1.82174e-41
1_5040074	AT1G14670	AT1G14670.1	TMN2	+	A	G	0.110336	269	3.62785	1.89819e-41
4_9400206	AT4G16720	AT4G16720.1	RPL15A	-	T	C	0.0225586	234	4.23003	2.06202e-41
5_8008273	AT5G23740	AT5G23740.1	RPS11C	-	T	C	0.0186215	134	15.5383	2.22857e-41
4_15520254	AT4G32130	AT4G32130.1	AT4G32130	-	T	C	0.116872	133	16.8822	2.72134e-41
2_8514320	AT2G19740	AT2G19740.1	RPL31A	+	A	G	0.0355907	144	7.27873	2.72434e-41
4_8056176	AT4G13940	AT4G13940.1,AT4G13940.2,AT4G13940.3	SAHH1	+	A	G	0.0522049	1378	1.80689	2.75332e-41
3_1621880	AT3G05590	AT3G05590.1,AT3G05590.2	RPL18B	+	A	G	0.0143827	411	5.25188	3.07462e-41
3_19810401	AT3G53430	AT3G53430.1	RPL12B	-	T	C	0.0165139	173	5.7395	3.51541e-41
4_18258398	AT4G39200	AT4G39200.1,AT4G39200.2	RPS25E	+	A	G	0.00968259	151	6.29791	3.56993e-41
3_2823881	AT3G09200	AT3G09200.1,AT3G09200.2	RPP0B	-	T	C	0.0277389	396	3.99987	3.62692e-41
4_16369982	AT4G34180	AT4G34180.1	AT4G34180	-	T	C	0.0669473	334	17.3208	4.42062e-41
4_14297795	AT4G29010	AT4G29010.1	AIM1	-	T	C	0.0475645	166	5.86298	4.48906e-41
1_10459659	AT1G29880	AT1G29880.1	GLYRS-1	-	T	C	0.209064	143	7.4758	4.58235e-41
5_4310549	AT5G13450	AT5G13450.1,AT5G13450.2	ATP5	-	T	C	0.019888	206	5.85391	4.81136e-41
4_15669693	AT4G32470	AT4G32470.1,AT4G32470.2	QCR7-1	-	T	C	0.00928776	175	5.05051	5.02392e-41
3_4433847	AT3G13580	AT3G13580.1,AT3G13580.2,AT3G13580.3,AT3G13580.4,AT3G13580.5,AT3G13580.6,AT3G13580.7,AT3G13580.8,AT3G13580.9	RPL7D	+	A	G	0.0563902	259	6.35057	5.18667e-41
4_15186922	AT4G31290	AT4G31290.1	AT4G31290	+	A	G	0.0639777	230	5.48413	7.18739e-41
2_9071018	AT2G21170	AT2G21170.1,AT2G21170.2	TIM	-	T	C	0.041225	175	16.6897	7.27733e-41
1_26485522	AT1G70310	AT1G70310.1	SPDSYN2	-	T	C	0.0713043	123	7.38578	7.37578e-41
1_27243809	AT1G72370	AT1G72370.1,AT1G72370.2	RPSAA	-	T	C	0.0148164	207	5.06657	8.39561e-41
3_9064779	AT3G24830	AT3G24830.1	RPL13AB	+	A	G	0.0211376	482	4.60318	9.4774e-41
5_24290604	AT5G60390	AT5G60390.1,AT5G60390.2,AT5G60390.3	A3	+	A	G	0.00722205	185	5.42998	1.17333e-40
3_14202097					A	G	0.0456242	648	2.8571	1.39057e-40
3_2823434	AT3G09200	AT3G09200.1,AT3G09200.2	RPP0B	-	T	C	0.0140398	199	4.88532	1.50597e-40
4_15471090	AT4G31990	AT4G31990.1,AT4G31990.3,AT4G31990.4	ASP5	-	T	C	0.166143	635	3.08072	1.57357e-40
2_8513010	AT2G19730	AT2G19730.1,AT2G19730.2,AT2G19730.3	RPL28A	+	A	G	0.0204765	159	7.38918	1.68238e-40
1_26689829	AT1G70770	AT1G70770.1,AT1G70770.2	AT1G70770	-	T	C	0.172475	579	2.01658	1.85276e-40
5_2542979	AT5G07960	AT5G07960.1	AT5G07960	+	A	G	0.0561159	217	5.50638	2.27899e-40
4_13554787	AT4G27000	AT4G27000.1	RBP45C	-	T	C	0.107383	128	16.8807	2.41348e-40
5_22087765	AT5G54390	AT5G54390.1	AHL	+	A	G	0.107444	140	16.8085	2.52373e-40
3_367365	AT3G02090	AT3G02090.1,AT3G02090.2	MPPBETA	+	A	G	0.0426295	297	4.47467	2.95745e-40
4_15693763	AT4G32530	AT4G32530.1,AT4G32530.2	VHA-c''1	-	T	C	0.0663705	254	3.6537	3.006e-40
5_3791336	AT5G11770	AT5G11770.1	AT5G11770	-	T	C	0.0122746	130	15.494	3.28272e-40
5_9873631	AT5G27850	AT5G27850.1,AT5G27850.2	RPL18C	+	A	G	0.0111172	285	5.10114	3.38882e-40
1_23957466	AT1G64520	AT1G64520.1	RPN12A	+	A	G	0.0442111	160	7.28115	3.4806e-40
5_24290605	AT5G60390	AT5G60390.1,AT5G60390.2,AT5G60390.3	A3	+	A	G	0.00652516	166	5.75521	3.57285e-40
1_4947410	AT1G14450	AT1G14450.2,AT1G14450.1	AT1G14450	-	T	C	0.0107827	139	16.591	3.86501e-40
3_22339089	AT3G60440	AT3G60440.1,AT3G60440.2	AT3G60440	+	A	G	0.20354	207	4.23337	4.08501e-40
2_16475973	AT2G39460	AT2G39460.1,AT2G39460.2	RPL23AA	+	A	G	0.0240166	127	15.9271	4.26982e-40
5_6267437	AT5G18800	AT5G18800.1,AT5G18800.2	AT5G18800	+	A	G	0.0538238	575	5.24752	4.39939e-40
3_2823792	AT3G09200	AT3G09200.1,AT3G09200.2	RPP0B	-	T	C	0.0164878	275	5.21248	4.43678e-40
5_4472426	AT5G13850	AT5G13850.1	NACA3	+	A	G	0.27301	2548	3.44546	4.51334e-40
4_2818002	AT4G05530	AT4G05530.1	SDRA	+	A	G	0.108716	227	7.51852	4.77184e-40
2_9071030	AT2G21170	AT2G21170.1,AT2G21170.2	TIM	-	T	C	0.0368468	165	16.5321	4.80686e-40
2_18249357	AT2G44120	AT2G44120.2,AT2G44120.1	RPL7C	-	T	C	0.0283735	213	4.96616	5.16006e-40
4_11161189	AT4G20850	AT4G20850.1	TPP2	-	T	C	0.0644096	234	6.38391	5.4645e-40
4_15520310	AT4G32130	AT4G32130.1	AT4G32130	-	T	C	0.0997991	149	17.2024	5.67641e-40
4_10035727	AT4G18100	AT4G18100.1	RPL32A	-	T	C	0.0107821	134	16.1378	5.87729e-40
3_21996350	AT3G59540	AT3G59540.1	RPL38B	-	T	C	0.0102573	171	5.64389	6.02887e-40
4_252291	AT4G00585	AT4G00585.1	AT4G00585	-	T	C	0.0388132	225	6.32244	6.86756e-40
5_6582181	AT5G19510	AT5G19510.1	AT5G19510	-	T	C	0.0143546	250	7.48881	7.99355e-40
5_1417648	AT5G04870	AT5G04870.1	CPK1	-	T	C	0.132267	182	4.89598	9.22634e-40
2_13182351	AT2G30980	AT2G30980.1	ASK6	-	T	C	0.130037	142	5.81176	9.43543e-40
4_6174727	AT4G09800	AT4G09800.1	RPS18A	+	A	G	0.0269871	329	6.40972	9.50691e-40
2_9943836	AT2G23350	AT2G23350.1	PAB4	+	A	G	0.0674977	222	4.35691	1.00474e-39
1_9485603	AT1G27310	AT1G27310.1	NTF2A	-	T	C	0.04341	387	6.3846	1.02853e-39
3_20501362	AT3G55280	AT3G55280.1,AT3G55280.3	RPL23AB	+	A	G	0.0544714	254	5.79774	1.31e-39
1_7954235	AT1G22520	AT1G22520.1,AT1G22520.2	AT1G22520	-	T	C	0.0945274	399	4.55433	1.34849e-39
3_3778618	AT3G11940	AT3G11940.1,AT3G11940.2	RPS5B	-	T	C	0.0113177	210	6.31965	1.36235e-39
3_2824995	AT3G09200	AT3G09200.1,AT3G09200.2	RPP0B	-	T	C	0.0330401	353	7.38569	1.39897e-39
4_37145	AT4G00100	AT4G00100.1	RPS13B	+	A	G	0.0577978	295	4.60887	1.68392e-39
3_543113	AT3G02560	AT3G02560.1,AT3G02560.2,AT3G02560.3	RPS7B	+	A	G	0.0233449	134	7.25263	1.72587e-39
1_313521	AT1G01910	AT1G01910.3,AT1G01910.5	AT1G01910	-	T	C	0.181595	148	5.16316	1.92135e-39
1_18871875	AT1G50920	AT1G50920.1	AT1G50920	+	A	G	0.112054	198	4.3076	2.079e-39
2_11818593	AT2G27720	AT2G27720.1,AT2G27720.4	RPP2A	+	A	G	0.027342	298	7.43374	2.25628e-39
5_9807569	AT5G27700	AT5G27700.1	RPS21C	-	T	C	0.0247734	317	7.42664	2.35421e-39
5_6090318	AT5G18380	AT5G18380.1,AT5G18380.2	RPS16C	-	T	C	0.013915	259	5.69911	2.72965e-39
4_6733264	AT4G11010	AT4G11010.1	NDPK3	-	T	C	0.0393526	496	3.46895	3.04475e-39
3_2615634	AT3G08610	AT3G08610.1	AT3G08610	-	T	C	0.0229055	184	7.34751	3.46551e-39
3_21034971	AT3G56800	AT3G56800.1	CAM2	-	T	C	0.0260348	139	18.5352	3.60823e-39
3_22269581	AT3G60245	AT3G60245.1	RPL37AC	+	A	G	0.00890721	268	5.67075	3.64528e-39
1_9533929	AT1G27450	AT1G27450.2,AT1G27450.1,AT1G27450.3	APT1	+	A	G	0.0478483	159	6.37791	3.96189e-39
3_23227961	AT3G62810	AT3G62810.1,AT3G62810.2	AT3G62810	+	A	G	0.0324382	302	5.30647	4.75639e-39
4_16339582	AT4G34110	AT4G34110.1	PAB2	+	A	G	0.0182178	184	5.819	5.4858e-39
2_19551462	AT2G47690	AT2G47690.1,AT2G47690.2,AT2G47690.3	AT2G47690	+	A	G	0.0158079	266	6.27265	5.70852e-39
4_9585864	AT4G17040	AT4G17040.1	CLPR4	-	T	C	0.196311	149	7.41062	6.44091e-39
3_21996225	AT3G59540	AT3G59540.1	RPL38B	-	T	C	0.0148295	210	5.71526	7.11779e-39
4_6559097	AT4G10610	AT4G10610.1,AT4G10610.2	CID12	+	A	G	0.0730634	166	4.35262	7.15905e-39
3_21196877	AT3G57290	AT3G57290.1	EIF3E	-	T	C	0.065729	243	17.3706	8.10937e-39
2_19345037	AT2G47110	AT2G47110.1,AT2G47110.2	RPS27AB	+	A	G	0.0655788	1065	3.1969	8.6891e-39
2_9070018	AT2G21160	AT2G21160.1	AT2G21160	+	A	G	0.025908	214	5.09095	8.94991e-39
3_4766192	AT3G14290	AT3G14290.1	PAE2	+	A	G	0.0607042	150	17.8483	9.48178e-39
4_16541697	AT4G34640	AT4G34640.1,AT4G34640.2	SQS1	+	A	G	0.106913	133	7.42032	9.53185e-39
5_19572499	AT5G48300	AT5G48300.1	APS1	+	A	G	0.23789	221	4.23184	1.00393e-38
2_18046775	AT2G43460	AT2G43460.1	RPL38B	-	T	C	0.00893202	185	5.71861	1.02091e-38
5_25735912	AT5G64350	AT5G64350.1	FKBP12	-	T	C	0.00762986	219	7.26265	1.0297e-38
3_16471988	AT3G45030	AT3G45030.1	RPS20A	-	T	C	0.0235073	250	4.85371	1.04328e-38
5_9781225	AT5G27640	AT5G27640.1,AT5G27640.2	TIF3B1	-	T	C	0.112628	132	7.34272	1.05944e-38
2_14271281	AT2G33740	AT2G33740.2,AT2G33740.1	CUTA	+	A	G	0.0760807	132	7.22169	1.09397e-38
4_13554762	AT4G27000	AT4G27000.1	RBP45C	-	T	C	0.140312	126	15.8903	1.09397e-38
2_11819095	AT2G27720	AT2G27720.1,AT2G27720.4,AT2G27720.3,AT2G27720.2	RPP2A	+	A	G	0.00930533	187	5.01345	1.20666e-38
5_22730835	AT5G56150	AT5G56150.1,AT5G56150.2	UBC30	+	A	G	0.0595452	199	5.15625	1.21792e-38
5_7139214	AT5G21020	AT5G21020.2	AT5G21020	+	A	G	0.0294065	165	3.87403	1.28257e-38
3_1362145	AT3G04920	AT3G04920.1,AT3G04920.2	RPS24A	+	A	G	0.0397602	252	7.42271	1.39714e-38
3_2823952	AT3G09200	AT3G09200.1,AT3G09200.2	RPP0B	-	T	C	0.0117577	159	4.59372	1.56228e-38
1_9245223	AT1G26740	AT1G26740.1	AT1G26740	-	T	C	0.140575	132	15.7188	1.67104e-38
3_39338	AT3G01120	AT3G01120.1	CGS1	-	T	C	0.033449	135	7.34753	2.15983e-38
1_4150870	AT1G12230	AT1G12230.1,AT1G12230.2	AT1G12230	+	A	G	0.428082	125	4.13078	2.18204e-38
3_18194525	AT3G49080	AT3G49080.1	AT3G49080	-	T	C	0.182273	255	4.33657	2.24746e-38
3_542539	AT3G02560	AT3G02560.1,AT3G02560.2,AT3G02560.3	RPS7B	+	A	G	0.0262783	277	7.35274	2.30543e-38
4_13520303	AT4G26910	AT4G26910.2,AT4G26910.1,AT4G26910.3	AT4G26910	-	T	C	0.0399489	125	7.21868	2.31648e-38
2_13806260	AT2G32520	AT2G32520.4,AT2G32520.3,AT2G32520.2,AT2G32520.1	AT2G32520	-	T	C	0.0485572	175	3.88642	2.54415e-38
3_2117550	AT3G06700	AT3G06700.1,AT3G06700.2,AT3G06700.3	RPL29A	-	T	C	0.00993984	152	6.16941	2.62515e-38
3_23037620	AT3G62250	AT3G62250.1	RPS27AC	+	A	G	0.015576	154	4.60661	2.77386e-38
1_27540495	AT1G73230	AT1G73230.1	AT1G73230	-	T	C	0.0204818	142	17.7	2.93105e-38
2_15647923	AT2G37270	AT2G37270.1,AT2G37270.2	RPS5A	-	T	C	0.0338235	184	7.4062	3.15972e-38
1_27847227	AT1G74050	AT1G74050.1	RPL6C	-	T	C	0.0322665	124	16.9917	3.31655e-38
4_16337959	AT4G34110	AT4G34110.1	PAB2	+	A	G	0.0396717	232	3.23745	3.80282e-38
3_3909177	AT3G12260	AT3G12260.1	AT3G12260	-	T	C	0.066956	216	7.44234	4.00874e-38
1_4947336	AT1G14450	AT1G14450.2,AT1G14450.1	AT1G14450	-	T	C	0.0149124	137	6.21755	4.22568e-38
5_24016509	AT5G59613	AT5G59613.2	AT5G59613	-	T	C	0.0112798	159	5.60224	4.38249e-38
2_9237258	AT2G21580	AT2G21580.1,AT2G21580.2	RPS25B	+	A	G	0.0106192	166	7.17535	4.57109e-38
2_19003657	AT2G46280	AT2G46280.1,AT2G46280.3	TIF3I1	-	T	C	0.0393582	130	7.21596	5.13127e-38
4_6948143	AT4G11420	AT4G11420.1	TIF3A1	-	T	C	0.0795424	292	16.6142	5.47092e-38
2_7548013	AT2G17360	AT2G17360.1	RPS4A	+	A	G	0.0250199	252	4.8085	5.53211e-38
3_5786674	AT3G16950	AT3G16950.2,AT3G16950.1	LPD1	-	T	C	0.126357	128	7.23851	5.56203e-38
2_15170781	AT2G36160	AT2G36160.1	RPS14A	+	A	G	0.0268145	433	5.31756	5.63668e-38
3_2917682	AT3G09500	AT3G09500.1	RPL35A	+	A	G	0.0140506	292	4.33589	5.76177e-38
5_5839682	AT5G17710	AT5G17710.2,AT5G17710.1	EMB1241	-	T	C	0.229689	229	3.4605	6.44428e-38
3_6453697	AT3G18740	AT3G18740.1	RPL30C	+	A	G	0.0112121	201	5.30316	6.60493e-38
5_3053939	AT5G09810	AT5G09810.1	ACT7	+	A	G	0.0380587	327	4.56096	6.62263e-38
2_673498	AT2G02510	AT2G02510.1	AT2G02510	+	A	G	0.0183187	180	16.8062	6.64894e-38
3_20893044	AT3G56340	AT3G56340.1	RPS26C	-	T	C	0.00943735	184	4.17645	6.86435e-38
1_5102667	AT1G14810	AT1G14810.1	AT1G14810	-	T	C	0.127178	146	17.5923	7.43542e-38
1_2169548	AT1G07070	AT1G07070.1	RPL35AA	+	A	G	0.0943304	193	16.4753	7.58771e-38
4_1075123	AT4G02450	AT4G02450.1,AT4G02450.2	AT4G02450	-	T	C	0.0228851	201	5.59059	8.33921e-38
2_14532208	AT2G34470	AT2G34470.1,AT2G34470.2	UREG	-	T	C	0.0438408	163	5.61359	8.40574e-38
2_11820121	AT2G27730	AT2G27730.1,AT2G27730.2,AT2G27730.3,AT2G27730.4	AT2G27730	-	T	C	0.0287956	312	6.30559	9.34963e-38
4_15186895	AT4G31290	AT4G31290.1	AT4G31290	+	A	G	0.0336043	124	16.9805	9.4508e-38
1_6350148	AT1G18450	AT1G18450.1	ARP4	+	A	G	0.195161	242	3.44181	9.89165e-38
5_6764393	AT5G20020	AT5G20020.1	RAN2	+	A	G	0.0373472	165	17.1442	1.02963e-37
3_2823430	AT3G09200	AT3G09200.1,AT3G09200.2	RPP0B	-	T	C	0.022558	309	4.95316	1.19048e-37
5_9874275	AT5G27850	AT5G27850.1,AT5G27850.2	RPL18C	+	A	G	0.0179555	212	6.32038	1.26496e-37
5_6851661	AT5G20290	AT5G20290.1	RPS8A	-	T	C	0.0161038	185	6.34356	1.30896e-37
3_16008565	AT3G44330	AT3G44330.1	AT3G44330	+	A	G	0.108539	347	2.14538	1.32692e-37
5_19091926	AT5G47030	AT5G47030.1	AT5G47030	+	A	G	0.0287583	211	5.71881	1.42958e-37
1_9527845	AT1G27435	AT1G27435.1	AT1G27435	-	T	C	0.0891325	187	7.41081	1.73597e-37
5_18045042	AT5G44720	AT5G44720.1	AT5G44720	+	A	G	0.0559567	124	7.20476	1.77109e-37
5_19406372	AT5G47930	AT5G47930.1	RPS27D	-	T	C	0.0189406	123	17.569	1.82137e-37
3_2616482	AT3G08610	AT3G08610.1	AT3G08610	-	T	C	0.0125702	170	6.11045	1.94703e-37
1_18357211	AT1G49600	AT1G49600.1,AT1G49600.2	RBP47A	-	T	C	0.0526726	135	5.38177	2.13257e-37
1_2460351	AT1G07930	AT1G07930.1,AT1G07930.2	A3	+	A	G	0.0244268	228	3.95448	2.18041e-37
3_1361563	AT3G04920	AT3G04920.1,AT3G04920.2	RPS24A	+	A	G	0.0262105	367	5.64927	2.36149e-37
1_1216477	AT1G04480	AT1G04480.1	RPL23C	+	A	G	0.00896168	145	16.4247	2.37628e-37
3_23037565	AT3G62250	AT3G62250.1	RPS27AC	+	A	G	0.0109453	157	4.39319	3.24609e-37
5_2870379	AT5G09225	AT5G09225.1	AT5G09225	-	T	C	0.234198	352	3.87288	3.47417e-37
3_23037448	AT3G62250	AT3G62250.1	RPS27AC	+	A	G	0.0113298	236	4.35588	3.62182e-37
2_16592559	AT2G39780	AT2G39780.1	RNS2	+	A	G	0.0811009	221	4.43084	3.82127e-37
5_26959389	AT5G67590	AT5G67590.1	FRO1	+	A	G	0.0360697	145	5.2507	3.98857e-37
1_25263048	AT1G67430	AT1G67430.1,AT1G67430.2	RPL17B	+	A	G	0.0123368	257	17.2603	4.34934e-37
1_608097	AT1G02780	AT1G02780.1	RPL19A	-	T	C	0.00928338	196	5.72569	4.59489e-37
5_1372314	AT5G04750	AT5G04750.1,AT5G04750.2	AT5G04750	+	A	G	0.0186974	211	6.21259	5.43421e-37
3_541799	AT3G02560	AT3G02560.1,AT3G02560.2	RPS7B	+	A	G	0.0377183	203	5.23288	6.1487e-37
5_4889672	AT5G15090	AT5G15090.1,AT5G15090.2	VDAC3	-	T	C	0.0229175	115	15.8812	6.26649e-37
1_12023998	AT1G33140	AT1G33140.1	RPL9B	+	A	G	0.00808548	140	6.12772	6.33691e-37
1_30007896	AT1G79750	AT1G79750.1	NADP-ME4	-	T	C	0.0411255	133	17.7434	6.43084e-37
2_14144132	AT2G33370	AT2G33370.1,AT2G33370.2	RPL23C	-	T	C	0.0297384	324	6.27019	6.56738e-37
5_21632679	AT5G53300	AT5G53300.1,AT5G53300.2,AT5G53300.4	UBC10	-	T	C	0.0399884	138	7.28769	6.60798e-37
1_5203693	AT1G15120	AT1G15120.2,AT1G15120.1	AT1G15120	+	A	G	0.0211391	363	7.22551	6.86712e-37
2_674525	AT2G02510	AT2G02510.1	AT2G02510	+	A	G	0.0272153	168	7.23447	7.76558e-37
5_14135968	AT5G35980	AT5G35980.1,AT5G35980.3	YAK1	+	A	G	0.307323	256	4.89519	7.78263e-37
5_21760168	AT5G53560	AT5G53560.1	CYTB5-E	+	A	G	0.0356231	516	4.93215	7.86579e-37
5_7435627	AT5G22440	AT5G22440.1,AT5G22440.2	RPL10AC	-	T	C	0.0326835	171	4.40642	8.77194e-37
3_18504750	AT3G49910	AT3G49910.1	RPL26A	+	A	G	0.0185811	220	6.31207	9.04812e-37
2_9113073	AT2G21290	AT2G21290.1	AT2G21290	+	A	G	0.0530276	296	4.71045	1.00565e-36
1_24248976	AT1G65290	AT1G65290.1	MTACP2	-	T	C	0.0328432	172	6.25786	1.01087e-36
1_12024495	AT1G33140	AT1G33140.1	RPL9B	+	A	G	0.00957867	148	16.5425	1.18682e-36
5_6803982	AT5G20160	AT5G20160.1,AT5G20160.2	AT5G20160	-	T	C	0.100421	167	17.2227	1.23406e-36
5_25852595	AT5G64670	AT5G64670.1	AT5G64670	-	T	C	0.133693	198	17.6534	1.31065e-36
3_5052177	AT3G15000	AT3G15000.1	MORF8	+	A	G	0.0568796	179	18.1842	1.33127e-36
1_30272253	AT1G80500	AT1G80500.1,AT1G80500.2	AT1G80500	+	A	G	0.0610661	181	7.33594	1.51188e-36
4_16484855	AT4G34490	AT4G34490.1,AT4G34490.2	CAP1	-	T	C	0.053065	116	18.1059	1.68779e-36
5_6785621	AT5G20080	AT5G20080.1	CBR2	+	A	G	0.0376502	141	7.20022	1.75285e-36
2_16954956	AT2G40620	AT2G40620.1	AT2G40620	-	T	C	0.233096	131	4.30334	1.75618e-36
3_9270729	AT3G25520	AT3G25520.1,AT3G25520.3	ATL5	-	T	C	0.0214899	268	6.16416	2.24226e-36
5_22349731	AT5G55070	AT5G55070.1,AT5G55070.2	AT5G55070	+	A	G	0.0664266	166	4.89872	2.38423e-36
5_6558116	AT5G19440	AT5G19440.1	AT5G19440	+	A	G	0.0499022	153	6.24858	2.4168e-36
2_15170277	AT2G36160	AT2G36160.1	RPS14A	+	A	G	0.0207511	226	6.05053	2.43859e-36
3_1362228	AT3G04920	AT3G04920.1,AT3G04920.2	RPS24A	+	A	G	0.0898509	247	5.60576	2.62761e-36
3_21638943	AT3G58500	AT3G58500.1	PP2A3	-	T	C	0.0350104	151	6.10039	2.6796e-36
4_9400382	AT4G16720	AT4G16720.1	RPL15A	-	T	C	0.102864	2410	4.74592	2.75679e-36
1_18217633	AT1G49240	AT1G49240.1	ACT8	+	A	G	0.0431878	446	3.6581	2.86702e-36
5_6090591	AT5G18380	AT5G18380.1,AT5G18380.3,AT5G18380.2	RPS16C	-	T	C	0.0115252	364	5.53013	3.0964e-36
5_3791153	AT5G11770	AT5G11770.1	AT5G11770	-	T	C	0.0147767	138	5.53503	3.17752e-36
5_19696059	AT5G48580	AT5G48580.1	FKBP15-2	-	T	C	0.0746562	114	7.17954	3.38794e-36
3_18760334	AT3G50550	AT3G50550.1,AT3G50550.2	AT3G50550	+	A	G	0.247582	128	16.6951	3.46015e-36
5_19623991	AT5G48412	AT5G48412.1	AT5G48412	-	T	C	0.0715211	276	2.98203	3.78114e-36
3_19819552	AT3G53460	AT3G53460.1,AT3G53460.4	CP29A	-	T	C	0.198118	358	5.03296	3.90139e-36
3_5669702	AT3G16640	AT3G16640.1	TCTP	-	T	C	0.00824075	224	4.24005	3.92244e-36
1_21073671	AT1G56280	AT1G56280.1,AT1G56280.2	ATDI19	-	T	C	0.0250392	383	7.11043	4.39475e-36
1_20390865	AT1G54580	AT1G54580.1	ACP2	+	A	G	0.0255202	130	6.15583	4.66692e-36
5_26549911	AT5G66510	AT5G66510.1,AT5G66510.2	GAMMACA3	-	T	C	0.0560786	137	15.7767	4.79114e-36
2_10609674	AT2G24940	AT2G24940.1	MP3	+	A	G	0.0303544	430	4.03824	4.86045e-36
4_18071990	AT4G38680	AT4G38680.1	CSP2	-	T	C	0.0481261	113	7.15621	5.29545e-36
5_3259672	AT5G10360	AT5G10360.1,AT5G10360.2	RPS6B	-	T	C	0.00895163	201	7.17491	5.64208e-36
4_13282550	AT4G26210	AT4G26210.1,AT4G26210.2	AT4G26210	+	A	G	0.0429809	124	15.2541	5.83079e-36
4_14473379	AT4G29430	AT4G29430.1	RPS15AE	+	A	G	0.133188	183	17.0182	5.85722e-36
4_11022821	AT4G20440	AT4G20440.1,AT4G20440.3,AT4G20440.4	SMB	-	T	C	0.106212	106	7.22329	5.87872e-36
4_5924286	AT4G09320	AT4G09320.1	NDPK1	+	A	G	0.0212179	331	4.56476	6.21276e-36
3_1009179	AT3G03920	AT3G03920.1	AT3G03920	-	T	C	0.0402609	179	5.23418	7.09094e-36
4_6948181	AT4G11420	AT4G11420.1	TIF3A1	-	T	C	0.0962343	391	4.69213	8.58624e-36
1_7083708	AT1G20430	AT1G20430.1	AT1G20430	-	T	C	0.0407895	155	5.58616	8.69281e-36
5_24290167	AT5G60390	AT5G60390.1,AT5G60390.2,AT5G60390.3	A3	+	A	G	0.0051871	173	5.60152	9.98506e-36
3_2252636	AT3G07110	AT3G07110.1,AT3G07110.2	RPL13AA	+	A	G	0.0103576	137	17.0739	1.02459e-35
2_11820870	AT2G27730	AT2G27730.1,AT2G27730.2,AT2G27730.3,AT2G27730.4	AT2G27730	-	T	C	0.0243072	200	7.12961	1.04271e-35
5_1028505	AT5G03850	AT5G03850.1	RPS28A	-	T	C	0.0170662	178	17.7815	1.07363e-35
5_22392832	AT5G55190	AT5G55190.1	RAN3	+	A	G	0.0137112	134	7.03723	1.07363e-35
1_3107503	AT1G09590	AT1G09590.1	RPL21A	+	A	G	0.021428	247	4.97962	1.10707e-35
5_16248541	AT5G40580	AT5G40580.1,AT5G40580.3	PBB2	-	T	C	0.0483487	142	6.16939	1.11108e-35
3_541818	AT3G02560	AT3G02560.1,AT3G02560.2,AT3G02560.3	RPS7B	+	A	G	0.0284982	189	16.5557	1.19996e-35
4_10302858	AT4G18730	AT4G18730.1	RPL11B	+	A	G	0.0144846	180	7.23355	1.46521e-35
5_25554883	AT5G63860	AT5G63860.1	UVR8	-	T	C	0.0713053	124	16.7132	1.56721e-35
1_27847704	AT1G74050	AT1G74050.1	RPL6C	-	T	C	0.0116916	126	6.12827	1.61097e-35
4_2440850	AT4G04800	AT4G04800.1	MSRB3	+	A	G	0.08657	185	5.35562	1.63501e-35
5_17693207	AT5G43970	AT5G43970.1	TOM9-2	+	A	G	0.0535211	133	6.18583	1.63901e-35
5_25750111	AT5G64400	AT5G64400.1,AT5G64400.2,AT5G64400.3	AT5G64400	+	A	G	0.0114681	161	4.62796	1.73348e-35
1_2460226	AT1G07930	AT1G07930.1,AT1G07930.2	A3	+	A	G	0.017236	167	7.20503	1.73723e-35
4_251088	AT4G00585	AT4G00585.1	AT4G00585	-	T	C	0.0639401	111	15.9696	1.83054e-35
2_16585982	AT2G39760	AT2G39760.1,AT2G39760.3	BPM3	+	A	G	0.273942	123	5.03342	1.96809e-35
1_3159374	AT1G09760	AT1G09760.1	U2A'	-	T	C	0.167331	210	7.46083	2.04648e-35
1_12370637	AT1G34030	AT1G34030.1	RPS18A	-	T	C	0.0213838	191	17.7265	2.33278e-35
4_5924265	AT4G09320	AT4G09320.1	NDPK1	+	A	G	0.0114917	206	4.17089	2.34291e-35
1_28530736	AT1G76010	AT1G76010.1,AT1G76010.2	AT1G76010	-	T	C	0.107733	163	17.1207	2.42351e-35
5_18663388	AT5G46020	AT5G46020.1	AT5G46020	-	T	C	0.0286293	113	16.1787	3.10666e-35
3_16471981	AT3G45030	AT3G45030.1	RPS20A	-	T	C	0.0159436	172	5.1517	3.20413e-35
3_1604062	AT3G05530	AT3G05530.1	RPT5A	+	A	G	0.03979	144	17.054	3.51689e-35
3_9270627	AT3G25520	AT3G25520.1,AT3G25520.3	ATL5	-	T	C	0.404752	5707	1.40556	3.64578e-35
2_14075550	AT2G33210	AT2G33210.1,AT2G33210.2	HSP60-2	-	T	C	0.083877	180	5.60413	3.96423e-35
1_29206970	AT1G77710	AT1G77710.1	AT1G77710	+	A	G	0.0159171	126	7.09425	4.10354e-35
1_25263474	AT1G67430	AT1G67430.1,AT1G67430.2	RPL17B	+	A	G	0.0104417	161	6.20664	4.3836e-35
4_12743984	AT4G24690	AT4G24690.1	AT4G24690	+	A	G	0.0296952	151	7.31769	4.58164e-35
1_4003181	AT1G11860	AT1G11860.3,AT1G11860.1	GDCST	+	A	G	0.0383095	126	6.17082	4.63112e-35
5_16282033	AT5G40650	AT5G40650.1,AT5G40650.2	SDH2-2	+	A	G	0.0404422	150	4.6808	4.65664e-35
5_23596348	AT5G58375	AT5G58375.1	AT5G58375	+	A	G	0.0391645	150	4.47874	4.80851e-35
1_7926995	AT1G22450	AT1G22450.1	COX6B-1	+	A	G	0.161643	429	2.09868	5.17688e-35
5_22350515	AT5G55070	AT5G55070.1	AT5G55070	+	A	G	0.0729108	130	6.18289	5.21702e-35
1_4927311	AT1G14400	AT1G14400.1,AT1G14400.2	UBC1	-	T	C	0.0548124	168	4.75963	5.26009e-35
5_13832533	AT5G35630	AT5G35630.1,AT5G35630.2,AT5G35630.3	GLN2	+	A	G	0.0205423	175	4.87579	5.27931e-35
4_627833	AT4G01480	AT4G01480.1,AT4G01480.2	PPA5	+	A	G	0.0389195	134	17.6598	5.55856e-35
5_17859902	AT5G44340	AT5G44340.1	TUBB4	-	T	C	0.0320513	170	3.44178	5.96167e-35
3_17779444	AT3G48140	AT3G48140.1	T24C20_20	+	A	G	0.0192668	144	17.6018	6.07412e-35
2_7837876	AT2G18020	AT2G18020.1	RPL8A	+	A	G	0.00884651	154	4.28692	6.18393e-35
5_22393961	AT5G55190	AT5G55190.1	RAN3	+	A	G	0.0294184	131	7.13389	7.23294e-35
5_23620895	AT5G58420	AT5G58420.1	RPS4D	+	A	G	0.0217729	112	16.3627	7.32915e-35
3_3481300	AT3G11120	AT3G11120.1	RPL41E	+	A	G	0.0396281	341	18.4558	7.63049e-35
1_1365458	AT1G04850	AT1G04850.1,AT1G04850.2	AT1G04850	-	T	C	0.352302	811	2.4784	7.65176e-35
4_16233377	AT4G33865	AT4G33865.1	RPS29A	-	T	C	0.0176332	180	17.7781	8.18765e-35
1_9533368	AT1G27450	AT1G27450.2,AT1G27450.1,AT1G27450.3	APT1	+	A	G	0.0170484	166	7.1636	8.59796e-35
4_16337597	AT4G34110	AT4G34110.1	PAB2	+	A	G	0.0942392	620	2.42494	8.83341e-35
1_9533807	AT1G27450	AT1G27450.2,AT1G27450.1,AT1G27450.3	APT1	+	A	G	0.0134457	158	7.13682	8.94483e-35
1_27109405	AT1G72020	AT1G72020.1	AT1G72020	-	T	C	0.0233469	149	15.8167	9.11789e-35
3_20942870	AT3G56490	AT3G56490.1	HIT3	+	A	G	0.0364536	199	7.31508	9.47215e-35
4_6732992	AT4G11010	AT4G11010.1	NDPK3	-	T	C	0.016328	221	5.62261	9.57464e-35
5_17160714	AT5G42790	AT5G42790.1	PAF1	-	T	C	0.0388027	175	5.15266	1.01519e-34
3_10281688	AT3G27740	AT3G27740.1,AT3G27740.2	CARA	-	T	C	0.10825	206	4.99961	1.05534e-34
3_39345	AT3G01120	AT3G01120.1	CGS1	-	T	C	0.0350877	140	5.30332	1.07548e-34
3_8475668	AT3G23600	AT3G23600.1,AT3G23600.2	AT3G23600	+	A	G	0.0199738	122	5.59214	1.09265e-34
5_3259638	AT5G10360	AT5G10360.1,AT5G10360.2	RPS6B	-	T	C	0.117475	2412	1.42558	1.0996e-34
2_16128772	AT2G38530	AT2G38530.1	LTP2	+	A	G	0.0635248	523	2.37318	1.12216e-34
4_8198251	AT4G14220	AT4G14220.1	RHF1A	+	A	G	0.209302	126	6.11245	1.17475e-34
3_1604304	AT3G05530	AT3G05530.1	RPT5A	+	A	G	0.108479	316	3.71177	1.22261e-34
4_16558370	AT4G34700	AT4G34700.1	CIB22	+	A	G	0.0198526	272	6.10599	1.41592e-34
3_19876451	AT3G53610	AT3G53610.1,AT3G53610.2,AT3G53610.3	RABE1A	-	T	C	0.108055	110	16.8385	1.43251e-34
5_9668464	AT5G27380	AT5G27380.1	GSH2	-	T	C	0.063745	128	17.9861	1.46864e-34
1_12370245	AT1G34030	AT1G34030.1	RPS18A	-	T	C	0.0571848	156	6.26112	1.63611e-34
1_12371100	AT1G34030	AT1G34030.1	RPS18A	-	T	C	0.0166098	151	6.1337	1.71703e-34
1_22398309	AT1G60850	AT1G60850.1,AT1G60850.3	ATRPAC42	-	T	C	0.289179	155	3.38137	1.75683e-34
4_12819720	AT4G24920	AT4G24920.1,AT4G24920.2	SEC61G2	-	T	C	0.0288043	205	18.5218	1.90371e-34
2_17461378	AT2G41840	AT2G41840.1	RPS2C	-	T	C	0.0278561	257	7.35663	1.96729e-34
5_24289816	AT5G60390	AT5G60390.1,AT5G60390.2,AT5G60390.3	A3	+	A	G	0.00652202	205	3.29802	1.9741e-34
2_11528492	AT2G27020	AT2G27020.1,AT2G27020.2	PAG1	-	T	C	0.0621118	220	6.18364	1.98229e-34
3_1167714	AT3G04400	AT3G04400.1,AT3G04400.2	RPL23C	+	A	G	0.0109845	294	4.41156	2.00444e-34
1_26621289	AT1G70600	AT1G70600.1	RPL27AC	-	T	C	0.00997053	159	6.1467	2.04857e-34
4_18012293	AT4G38510	AT4G38510.5,AT4G38510.1	VHA-B2	-	T	C	0.0644917	170	17.9114	2.41853e-34
1_28517389	AT1G75950	AT1G75950.1	SKP1A	+	A	G	0.0139442	154	6.15273	2.59556e-34
5_22944025	AT5G56710	AT5G56710.1,AT5G56710.2	RPL31C	-	T	C	0.0176981	155	7.12191	2.8302e-34
2_17591546	AT2G42210	AT2G42210.2,AT2G42210.1	OEP163	+	A	G	0.0194699	119	5.58229	2.95127e-34
5_23246226	AT5G57370	AT5G57370.1	AT5G57370	+	A	G	0.120904	107	15.5424	3.16813e-34
5_12590647	AT5G33320	AT5G33320.1	PPT1	+	A	G	0.046595	143	5.5033	3.19069e-34
5_25665151	AT5G64130	AT5G64130.1,AT5G64130.2,AT5G64130.3	AT5G64130	-	T	C	0.0175917	187	7.23512	3.28901e-34
4_15159321	AT4G31180	AT4G31180.1,AT4G31180.2	AT4G31180	+	A	G	0.113482	234	5.62726	3.48944e-34
5_6764174	AT5G20020	AT5G20020.1	RAN2	+	A	G	0.0249663	278	5.55571	3.58858e-34
2_15170713	AT2G36160	AT2G36160.1	RPS14A	+	A	G	0.00791711	162	7.08471	3.62264e-34
3_17637399	AT3G47810	AT3G47810.1,AT3G47810.2,AT3G47810.3	VPS29	-	T	C	0.0512751	189	7.33154	3.77261e-34
5_18662994	AT5G46020	AT5G46020.1	AT5G46020	-	T	C	0.0848297	137	16.3524	3.87333e-34
3_10056032	AT3G27240	AT3G27240.1	CYC11	-	T	C	0.0349839	130	17.0413	3.96761e-34
1_26688423	AT1G70770	AT1G70770.1	AT1G70770	-	T	C	0.0973783	104	17.2219	4.03208e-34
2_9504965	AT2G22400	AT2G22400.1	AT2G22400	-	T	C	0.248466	162	7.46194	4.07811e-34
4_11266693	AT4G21105	AT4G21105.1,AT4G21105.3	AT4G21105	+	A	G	0.00852612	164	16.7225	4.11712e-34
1_10640196	AT1G30230	AT1G30230.1,AT1G30230.2	AT1G30230	+	A	G	0.0135002	192	7.23475	4.30357e-34
2_1894696	AT2G05220	AT2G05220.1,AT2G05220.2	RPS17B	-	T	C	0.0533952	184	7.21859	4.30357e-34
1_25263641	AT1G67430	AT1G67430.1,AT1G67430.2	RPL17B	+	A	G	0.0130995	121	7.00701	4.34463e-34
1_19103378	AT1G51510	AT1G51510.1	Y14	-	T	C	0.0634864	177	17.9643	4.44804e-34
3_9270196	AT3G25520	AT3G25520.1,AT3G25520.2	ATL5	-	T	C	0.0107253	160	7.06886	4.58445e-34
5_21355745	AT5G52650	AT5G52650.1	RPS10C	-	T	C	0.022704	133	6.10554	4.72416e-34
5_1028506	AT5G03850	AT5G03850.1	RPS28A	-	T	C	0.0248747	258	7.2515	4.76772e-34
1_4888960	AT1G14320	AT1G14320.1,AT1G14320.2	RPL10A	+	A	G	0.0147409	316	5.26033	4.95713e-34
1_9206548	AT1G26630	AT1G26630.1,AT1G26630.2	ELF5A-2	+	A	G	0.00811778	220	5.20456	5.02276e-34
2_12769178	AT2G29960	AT2G29960.1,AT2G29960.2	CYP19-4	-	T	C	0.0924092	168	16.4235	5.62041e-34
1_17717311	AT1G48030	AT1G48030.1,AT1G48030.2,AT1G48030.3,AT1G48030.4,AT1G48030.5	LPD1	-	T	C	0.0951577	169	17.5802	5.8171e-34
1_18139777	AT1G49040	AT1G49040.1,AT1G49040.4	SCD1	-	T	C	0.139733	115	15.7509	5.90822e-34
3_9270271	AT3G25520	AT3G25520.1,AT3G25520.2	ATL5	-	T	C	0.0192742	273	3.40562	5.97535e-34
3_1331103	AT3G04840	AT3G04840.1	RPS3AA	+	A	G	0.0115164	185	4.29054	6.83375e-34
3_20846303	AT3G56190	AT3G56190.1,AT3G56190.2	ASNAP2	-	T	C	0.0521739	180	3.38707	7.38228e-34
1_27850163	AT1G74060	AT1G74060.1	RPL6B	-	T	C	0.0174757	153	7.16038	7.68609e-34
1_3136646	AT1G09690	AT1G09690.1	RPL21A	-	T	C	0.00467714	134	5.95463	7.70845e-34
1_2408450	AT1G07770	AT1G07770.1,AT1G07770.2,AT1G07770.3	RPS15AA	-	T	C	0.0161267	220	17.0876	7.93228e-34
5_22393770	AT5G55190	AT5G55190.1	RAN3	+	A	G	0.0282652	211	5.64894	8.69222e-34
1_12370146	AT1G34030	AT1G34030.1	RPS18A	-	T	C	0.0641487	107	7.0603	8.81747e-34
1_18986195	AT1G51200	AT1G51200.1,AT1G51200.2,AT1G51200.3,AT1G51200.4	SAP2	+	A	G	0.0198722	112	6.10605	8.92676e-34
5_23207107	AT5G57290	AT5G57290.1,AT5G57290.2,AT5G57290.3	RPP3B	-	T	C	0.0148582	185	3.77667	9.30508e-34
5_6764242	AT5G20020	AT5G20020.1	RAN2	+	A	G	0.0391739	368	5.49079	9.43245e-34
3_3735533	AT3G11830	AT3G11830.1,AT3G11830.2	CCT7	+	A	G	0.0358011	162	4.90706	9.96162e-34
1_2408686	AT1G07770	AT1G07770.1,AT1G07770.2,AT1G07770.3	RPS15AA	-	T	C	0.0133653	212	5.13507	1.02929e-33
3_1331087	AT3G04840	AT3G04840.1	RPS3AA	+	A	G	0.0172808	272	4.83663	1.02999e-33
1_17321573	AT1G47260	AT1G47260.1	GAMMACA2	-	T	C	0.0153865	123	17.6686	1.1268e-33
5_19092072	AT5G47030	AT5G47030.1	AT5G47030	+	A	G	0.035517	135	16.4755	1.20612e-33
2_17591571	AT2G42210	AT2G42210.2,AT2G42210.1	OEP163	+	A	G	0.025705	134	6.14409	1.20714e-33
1_7712973	AT1G21930	AT1G21930.1	AT1G21930	+	A	G	0.213936	175	3.58196	1.37297e-33
5_554311	AT5G02500	AT5G02500.1,AT5G02500.2	MED37E	-	T	C	0.0105043	256	4.40327	1.40243e-33
5_6804895	AT5G20160	AT5G20160.1,AT5G20160.3,AT5G20160.2	AT5G20160	-	T	C	0.0207499	202	5.53854	1.44299e-33
5_25394785	AT5G63400	AT5G63400.1,AT5G63400.2	ADK1	-	T	C	0.0507155	280	6.11126	1.91237e-33
2_16918497	AT2G40510	AT2G40510.1	RPS26B	+	A	G	0.0195277	129	6.92686	1.92457e-33
1_17321398	AT1G47260	AT1G47260.1	GAMMACA2	-	T	C	0.0383187	196	7.24919	1.92955e-33
5_19292878	AT5G47570	AT5G47570.1	AT5G47570	-	T	C	0.0147144	127	6.02974	1.99378e-33
4_13557675	AT4G27000	AT4G27000.1	RBP45C	-	T	C	0.0532056	200	5.43198	1.99407e-33
1_29918218	AT1G79530	AT1G79530.1	GAPCP1	-	T	C	0.0274151	168	5.05727	2.12379e-33
4_16558573	AT4G34700	AT4G34700.1	CIB22	+	A	G	0.0253846	297	6.16349	2.22389e-33
4_16370168	AT4G34180	AT4G34180.1	AT4G34180	-	T	C	0.0264008	188	7.20483	2.23009e-33
3_44727	AT3G01130	AT3G01130.1,AT3G01130.2,AT3G01130.3,AT3G01130.5,AT3G01130.4	AT3G01130	-	T	C	0.0213511	189	16.5792	2.33805e-33
2_14532944	AT2G34480	AT2G34480.1,AT2G34480.2	RPL18AB	-	T	C	0.0212698	331	4.78181	2.38192e-33
5_23208766	AT5G57300	AT5G57300.1,AT5G57300.2,AT5G57300.3,AT5G57300.4	COQ5	-	T	C	0.116592	182	16.8269	2.41096e-33
3_22402370	AT3G60600	AT3G60600.1,AT3G60600.3,AT3G60600.2	PVA11	+	A	G	0.0343128	181	16.9315	2.4889e-33
5_1389712	AT5G04800	AT5G04800.1,AT5G04800.2,AT5G04800.3,AT5G04800.4	RPS17D	+	A	G	0.0372822	107	17.1305	2.53544e-33
5_13109478	AT5G34850	AT5G34850.1	PAP26	-	T	C	0.0242733	157	17.8282	2.64527e-33
4_12551926	AT4G24190	AT4G24190.1,AT4G24190.2	SHD	-	T	C	0.0586701	225	6.28188	2.80878e-33
5_693264	AT5G02960	AT5G02960.1	RPS23B	-	T	C	0.0181046	145	17.511	2.81745e-33
5_23516180	AT5G58110	AT5G58110.1	AT5G58110	+	A	G	0.0225061	111	15.818	2.87959e-33
1_28528465	AT1G76010	AT1G76010.1,AT1G76010.2	AT1G76010	-	T	C	0.0272647	124	16.122	3.06714e-33
1_21073158	AT1G56280	AT1G56280.1,AT1G56280.2	ATDI19	-	T	C	0.011881	107	6.10389	3.15369e-33
5_3035588	AT5G09770	AT5G09770.1	AT5G09770	-	T	C	0.05474	220	7.24257	3.66093e-33
2_14143750	AT2G33370	AT2G33370.1,AT2G33370.2	RPL23C	-	T	C	0.0209908	125	15.703	3.77321e-33
4_18057364	AT4G38630	AT4G38630.1	RPN10	-	T	C	0.0399868	121	7.10291	3.96373e-33
1_7178652	AT1G20693	AT1G20693.1,AT1G20693.3,AT1G20693.2	HMGB2	+	A	G	0.117499	374	2.96956	4.06565e-33
1_23790817	AT1G64090	AT1G64090.1,AT1G64090.2	RTNLB3	+	A	G	0.201923	105	6.25871	4.27268e-33
1_1354640	AT1G04810	AT1G04810.1	RPN2B	+	A	G	0.139785	143	7.11326	4.54737e-33
5_5269339	AT5G16130	AT5G16130.1	RPS7C	+	A	G	0.0361275	484	2.76658	5.04285e-33
1_4946347	AT1G14450	AT1G14450.2,AT1G14450.1	AT1G14450	-	T	C	0.130019	204	6.25096	5.12301e-33
3_17650446	AT3G47836	AT3G47836.1,AT3G47836.2	AT3G47836	-	T	C	0.0465789	145	17.424	5.43751e-33
1_22810295	AT1G61770	AT1G61770.1	C50	+	A	G	0.0892169	139	5.95955	5.57772e-33
5_588309	AT5G02610	AT5G02610.1,AT5G02610.2	RPL35D	+	A	G	0.0402716	344	4.82259	6.37865e-33
2_8513623	AT2G19740	AT2G19740.1	RPL31A	+	A	G	0.0408678	243	5.78215	6.38313e-33
2_8512951	AT2G19730	AT2G19730.1,AT2G19730.2,AT2G19730.3	RPL28A	+	A	G	0.0175126	246	4.38928	6.58678e-33
3_7844208	AT3G22230	AT3G22230.1	RPL27B	-	T	C	0.0271815	214	5.57341	6.60762e-33
1_21356129	AT1G57660	AT1G57660.1	RPL21F	+	A	G	0.00829111	126	5.50726	6.86974e-33
5_6943667	AT5G20520	AT5G20520.1	WAV2	-	T	C	0.11119	156	4.22121	7.14194e-33
4_1296042	AT4G02930	AT4G02930.1	TUFA	-	T	C	0.0322677	217	4.85423	7.15903e-33
1_6950067	AT1G20050	AT1G20050.1	HYD1	+	A	G	0.0407886	120	16.7196	9.09983e-33
3_19627380	AT3G52930	AT3G52930.1	AT3G52930	-	T	C	0.00921369	161	18.3536	9.10193e-33
1_12011610	AT1G33120	AT1G33120.1	RPL9B	+	A	G	0.00823016	117	6.00719	9.9172e-33
4_12593381	AT4G24280	AT4G24280.1	HSP70-6	+	A	G	0.0483288	107	7.11611	1.06532e-32
1_21379873	AT1G57720	AT1G57720.1,AT1G57720.2	AT1G57720	+	A	G	0.0510119	305	4.75823	1.09643e-32
4_12604054	AT4G24330	AT4G24330.1	AT4G24330	-	T	C	0.518519	1610	1.53201	1.35275e-32
2_18857734	AT2G45790	AT2G45790.1	PMM	+	A	G	0.0309774	103	17.2276	1.36864e-32
3_2389457	AT3G07480	AT3G07480.1	AT3G07480	+	A	G	0.0278797	190	6.09914	1.39284e-32
3_20636147	AT3G55620	AT3G55620.1	EIF6-2	+	A	G	0.0425863	137	6.04954	1.42357e-32
1_21030900	AT1G56200	AT1G56200.1,AT1G56200.2	emb1303	+	A	G	0.0498	249	6.12671	1.46043e-32
5_16610071	AT5G41520	AT5G41520.1,AT5G41520.2	RPS10B	-	T	C	0.021167	226	6.18901	1.48807e-32
4_16535174	AT4G34620	AT4G34620.1	SSR16	-	T	C	0.0192451	129	6.09941	1.53751e-32
3_3861045	AT3G12120	AT3G12120.1,AT3G12120.2	FAD2	-	T	C	0.0159796	169	3.68222	1.55265e-32
1_2637739	AT1G08360	AT1G08360.1	RPL10AA	+	A	G	0.0244701	127	15.9078	1.56799e-32
3_3400492	AT3G10860	AT3G10860.1,AT3G10860.2	AT3G10860	+	A	G	0.0104836	248	4.48739	1.75853e-32
2_7343088	AT2G16940	AT2G16940.1,AT2G16940.4,AT2G16940.2,AT2G16940.3	AT2G16940	-	T	C	0.226415	120	5.16365	1.78922e-32
1_29207894	AT1G77710	AT1G77710.1	AT1G77710	+	A	G	0.043087	158	17.3084	1.80583e-32
5_16609437	AT5G41520	AT5G41520.1,AT5G41520.2	RPS10B	-	T	C	0.032596	308	3.73753	1.88157e-32
4_17825357	AT4G37910	AT4G37910.1,AT4G37910.2	HSP70-9	-	T	C	0.0576329	168	17.7945	2.06036e-32
1_4051896	AT1G12000	AT1G12000.1	PFP-BETA1	-	T	C	0.0610501	200	3.53487	2.13371e-32
2_18046743	AT2G43460	AT2G43460.1	RPL38B	-	T	C	0.0140436	271	6.05355	2.48e-32
3_283962	AT3G01790	AT3G01790.1,AT3G01790.3	AT3G01790	-	T	C	0.051088	108	16.1414	2.52267e-32
4_15308259	AT4G31580	AT4G31580.1,AT4G31580.2	RSZ22	+	A	G	0.166176	113	6.98854	2.67184e-32
2_1894699	AT2G05220	AT2G05220.1,AT2G05220.2	RPS17B	-	T	C	0.0317594	113	16.2978	2.81989e-32
1_2408764	AT1G07770	AT1G07770.1,AT1G07770.2,AT1G07770.3	RPS15AA	-	T	C	0.0112582	193	5.58643	3.01378e-32
3_21635539	AT3G58500	AT3G58500.1	PP2A3	-	T	C	0.0286104	105	17.2156	3.04394e-32
2_14078996	AT2G33220	AT2G33220.1,AT2G33220.2	AT2G33220	+	A	G	0.0478486	268	5.45031	3.16905e-32
4_16558619	AT4G34700	AT4G34700.1	CIB22	+	A	G	0.0164646	167	16.6642	3.2292e-32
5_5093972	AT5G15650	AT5G15650.1	RGP2	+	A	G	0.0233293	214	4.86325	3.24293e-32
1_5327594	AT1G15500	AT1G15500.1	AATP2	+	A	G	0.0365201	157	4.21192	3.37064e-32
3_705835	AT3G03100	AT3G03100.1,AT3G03100.2	AT3G03100	-	T	C	0.0115056	105	16.8347	3.90929e-32
3_22400543	AT3G60600	AT3G60600.1,AT3G60600.3,AT3G60600.2	PVA11	+	A	G	0.0288324	161	6.98474	3.97898e-32
1_2828782	AT1G08830	AT1G08830.1,AT1G08830.2	CSD1	+	A	G	0.02424	181	15.8873	4.03836e-32
1_12024529	AT1G33140	AT1G33140.1	RPL9B	+	A	G	0.0115478	124	17.1786	4.15384e-32
2_7547962	AT2G17360	AT2G17360.1	RPS4A	+	A	G	0.0165419	179	7.09806	4.23692e-32
5_6581903	AT5G19510	AT5G19510.1	AT5G19510	-	T	C	0.00810167	102	16.3688	4.23692e-32
4_16374093	AT4G34200	AT4G34200.1	PGDH1	-	T	C	0.0719509	305	4.0151	4.24598e-32
3_9065281	AT3G24830	AT3G24830.1	RPL13AB	+	A	G	0.0069309	135	4.54429	4.80656e-32
1_27847649	AT1G74050	AT1G74050.1	RPL6C	-	T	C	0.0122436	117	5.44574	5.00203e-32
5_9692773	AT5G27450	AT5G27450.1,AT5G27450.2,AT5G27450.3	MVK	+	A	G	0.101977	98	15.3077	5.03653e-32
5_19292837	AT5G47570	AT5G47570.1	AT5G47570	-	T	C	0.0274149	170	16.6141	5.26806e-32
5_22935408	AT5G56670	AT5G56670.1	RPS30C	-	T	C	0.0114736	198	7.05561	5.31449e-32
5_13108739	AT5G34850	AT5G34850.1	PAP26	-	T	C	0.0343931	238	4.52188	6.08997e-32
1_24486702	AT1G65820	AT1G65820.1,AT1G65820.3,AT1G65820.2	AT1G65820	+	A	G	0.0221594	149	5.52736	6.1549e-32
4_9400565	AT4G16720	AT4G16720.1	RPL15A	-	T	C	0.00887672	214	5.1615	6.385e-32
2_7988856	AT2G18390	AT2G18390.1	ARL2	+	A	G	0.0567686	117	7.02499	6.72431e-32
4_17203207	AT4G36420	AT4G36420.1	AT4G36420	-	T	C	0.12614	166	5.55545	6.93736e-32
1_26127500	AT1G69510	AT1G69510.1,AT1G69510.2,AT1G69510.3	AT1G69510	+	A	G	0.0296894	173	16.7855	7.04762e-32
3_2823808	AT3G09200	AT3G09200.1,AT3G09200.2	RPP0B	-	T	C	0.00920867	150	4.83532	7.59642e-32
4_12420024	AT4G23885	AT4G23885.1	AT4G23885	+	A	G	0.0366216	111	17.0313	7.69746e-32
5_19390357	AT5G47890	AT5G47890.1	AT5G47890	+	A	G	0.0249969	201	5.56934	7.72712e-32
5_20104729	AT5G49540	AT5G49540.1,AT5G49540.2	AT5G49540	-	T	C	0.0968992	100	15.1567	7.98435e-32
2_14532395	AT2G34470	AT2G34470.1,AT2G34470.2	UREG	-	T	C	0.0790333	121	16.1195	8.49971e-32
1_17982442	AT1G48630	AT1G48630.1	RACK1B	-	T	C	0.0182678	143	7.04069	8.55052e-32
1_5102730	AT1G14810	AT1G14810.1	AT1G14810	-	T	C	0.0807692	105	16.8895	8.62055e-32
2_11764192	AT2G27530	AT2G27530.1,AT2G27530.2	RPL10AB	-	T	C	0.0089889	153	6.99115	8.84748e-32
2_11821799	AT2G27730	AT2G27730.1,AT2G27730.2,AT2G27730.3,AT2G27730.4	AT2G27730	-	T	C	0.0306844	217	5.43131	9.46326e-32
1_22053703	AT1G59900	AT1G59900.1	E1 ALPHA	+	A	G	0.154939	229	3.94728	1.01737e-31
5_554194	AT5G02500	AT5G02500.1,AT5G02500.2	MED37E	-	T	C	0.00654582	156	3.94875	1.04375e-31
5_9668470	AT5G27380	AT5G27380.1	GSH2	-	T	C	0.0777667	156	16.8753	1.05798e-31
5_25750127	AT5G64400	AT5G64400.1,AT5G64400.2,AT5G64400.3	AT5G64400	+	A	G	0.0122446	160	7.09535	1.06581e-31
1_50556	AT1G01100	AT1G01100.1,AT1G01100.3	RPP1A	-	T	C	0.0096161	257	3.64411	1.13742e-31
1_1163346	AT1G04340	AT1G04340.1	AT1G04340	-	T	C	0.0916667	121	7.12627	1.15993e-31
5_25394729	AT5G63400	AT5G63400.1,AT5G63400.2	ADK1	-	T	C	0.0179817	214	6.94217	1.38521e-31
1_19103028	AT1G51510	AT1G51510.1	Y14	-	T	C	0.0842621	189	16.2975	1.47007e-31
1_24249080	AT1G65290	AT1G65290.1	MTACP2	-	T	C	0.01547	145	7.04908	1.58435e-31
2_14531381	AT2G34470	AT2G34470.1,AT2G34470.2	UREG	-	T	C	0.0782347	234	18.2241	1.62465e-31
5_3259458	AT5G10360	AT5G10360.1,AT5G10360.2	RPS6B	-	T	C	0.0152905	330	4.08536	1.80785e-31
3_19365878	AT3G52200	AT3G52200.1,AT3G52200.2	LTA3	+	A	G	0.0767296	183	7.17557	1.84173e-31
2_9113064	AT2G21290	AT2G21290.1	AT2G21290	+	A	G	0.0309119	180	5.99692	1.88947e-31
1_2463225	AT1G07940	AT1G07940.1,AT1G07940.2,AT1G07940.3,AT1G07940.4	A3	-	T	C	0.0223881	141	7.06998	1.91816e-31
5_19294406	AT5G47570	AT5G47570.1	AT5G47570	-	T	C	0.0197731	305	4.46422	1.93777e-31
5_16341138	AT5G40810	AT5G40810.1,AT5G40810.2	CYC12	+	A	G	0.0533581	201	3.02037	1.94579e-31
2_9945662	AT2G23350	AT2G23350.1	PAB4	+	A	G	0.0307615	122	16.8444	1.98537e-31
4_6947789	AT4G11420	AT4G11420.1	TIF3A1	-	T	C	0.0585611	105	16.7507	2.02023e-31
3_20790858	AT3G56020	AT3G56020.1	RPL41E	-	T	C	0.0197946	160	6.94674	2.08162e-31
3_3673986	AT3G11630	AT3G11630.1	BAS1	+	A	G	0.0801724	93	16.362	2.14189e-31
2_15170373	AT2G36160	AT2G36160.1	RPS14A	+	A	G	0.00642755	112	17.776	2.23548e-31
5_22297999	AT5G54900	AT5G54900.1	RBP45A	+	A	G	0.0426148	103	6.95058	2.23548e-31
5_19789404	AT5G48810	AT5G48810.1	CYTB5-D	-	T	C	0.0236147	254	7.09758	2.26449e-31
1_21073900	AT1G56280	AT1G56280.1,AT1G56280.2	ATDI19	-	T	C	0.00834511	124	6.98913	2.27002e-31
3_18504800	AT3G49910	AT3G49910.1	RPL26A	+	A	G	0.01624	170	7.09967	2.28784e-31
3_44751	AT3G01130	AT3G01130.1,AT3G01130.2,AT3G01130.3,AT3G01130.5,AT3G01130.4	AT3G01130	-	T	C	0.0253127	253	5.97699	2.29503e-31
1_608274	AT1G02780	AT1G02780.1	RPL19A	-	T	C	0.00755007	216	4.28989	2.56879e-31
4_798209	AT4G01850	AT4G01850.1,AT4G01850.2	SAM2	-	T	C	0.0378609	240	3.6994	2.60399e-31
1_3136472	AT1G09690	AT1G09690.1	RPL21A	-	T	C	0.0103397	133	4.34567	2.67827e-31
4_15252245	AT4G31430	AT4G31430.2,AT4G31430.1	KAKU4	+	A	G	0.158192	112	5.45057	2.84202e-31
4_2817567	AT4G05530	AT4G05530.1	SDRA	+	A	G	0.0660432	113	6.93181	2.8498e-31
4_15346230	AT4G31700	AT4G31700.1,AT4G31700.2	RPS6A	-	T	C	0.0197089	130	7.02828	2.88988e-31
5_25394241	AT5G63400	AT5G63400.1,AT5G63400.2	ADK1	-	T	C	0.0196078	290	4.09024	3.10815e-31
4_12677986	AT4G24550	AT4G24550.2,AT4G24550.1,AT4G24550.3	AP4M	+	A	G	0.0642648	132	4.99653	3.24589e-31
5_23516355	AT5G58110	AT5G58110.1	AT5G58110	+	A	G	0.0280093	121	16.1378	3.6061e-31
4_15209359	AT4G31340	AT4G31340.1,AT4G31340.2	AT4G31340	+	A	G	0.0345203	95	15.0462	3.60898e-31
3_1167749	AT3G04400	AT3G04400.1,AT3G04400.2	RPL23C	+	A	G	0.00506967	151	5.34254	3.66824e-31
1_24485983	AT1G65820	AT1G65820.1,AT1G65820.3,AT1G65820.2	AT1G65820	+	A	G	0.0115583	112	6.96187	3.76825e-31
4_16476846	AT4G34450	AT4G34450.1	AT4G34450	+	A	G	0.0454133	100	15.496	3.85821e-31
2_14176744	AT2G33470	AT2G33470.1,AT2G33470.2	GLTP1	-	T	C	0.026087	132	16.0213	4.04289e-31
4_16370056	AT4G34180	AT4G34180.1	AT4G34180	-	T	C	0.0336792	211	5.49333	4.22666e-31
4_17098534	AT4G36130	AT4G36130.1	RPL8C	+	A	G	0.0208292	209	4.49038	4.25719e-31
5_9873878	AT5G27850	AT5G27850.1,AT5G27850.2	RPL18C	+	A	G	0.00935509	207	5.45944	4.4006e-31
4_15671030	AT4G32470	AT4G32470.1,AT4G32470.2	QCR7-1	-	T	C	0.0266729	344	4.11983	4.5644e-31
2_12416011	AT2G28910	AT2G28910.1,AT2G28910.2,AT2G28910.3	CXIP4	-	T	C	0.0552949	165	7.13647	4.87988e-31
1_5472697	AT1G15930	AT1G15930.1,AT1G15930.2	RPS12A	+	A	G	0.017815	219	7.19935	5.1364e-31
3_2615632	AT3G08610	AT3G08610.1	AT3G08610	-	T	C	0.0214008	176	18.1174	5.46596e-31
5_9837001	AT5G27770	AT5G27770.1	RPL22C	+	A	G	0.00860658	163	17.8251	5.69325e-31
2_14568999	AT2G34590	AT2G34590.1	E1-BETA-2	-	T	C	0.0532915	102	6.96824	6.04009e-31
1_21073367	AT1G56280	AT1G56280.1,AT1G56280.2	ATDI19	-	T	C	0.011271	130	3.64337	6.48259e-31
5_14900234	AT5G37510	AT5G37510.1,AT5G37510.2	EMB1467	+	A	G	0.0403357	149	4.35791	7.03031e-31
5_863227	AT5G03455	AT5G03455.1,AT5G03455.2	CDC25	+	A	G	0.0330603	113	16.3681	7.60178e-31
4_346918	AT4G00810	AT4G00810.1,AT4G00810.2	RPP1B	-	T	C	0.0100582	114	16.8868	8.03315e-31
3_405985	AT3G02190	AT3G02190.1	RPL39B	-	T	C	0.0386485	159	17.0823	8.04471e-31
1_18059836	AT1G48830	AT1G48830.1,AT1G48830.2	RPS7A	-	T	C	0.0438247	143	16.7842	8.87362e-31
4_16986673	AT4G35850	AT4G35850.1	AT4G35850	+	A	G	0.071223	99	16.1667	9.07321e-31
2_13639591	AT2G32060	AT2G32060.1,AT2G32060.2,AT2G32060.3	RPS12C	-	T	C	0.0101223	115	17.0863	9.21038e-31
4_12884597	AT4G25100	AT4G25100.1,AT4G25100.4	FSD1	-	T	C	0.00835518	102	6.8944	9.84431e-31
5_3443876	AT5G10920	AT5G10920.1	T30N20_190	+	A	G	0.218351	188	7.2012	9.84793e-31
4_15188211	AT4G31290	AT4G31290.1	AT4G31290	+	A	G	0.0493827	132	4.23012	1.00011e-30
5_25393797	AT5G63400	AT5G63400.1,AT5G63400.2	ADK1	-	T	C	0.0160385	120	6.85969	1.02638e-30
5_8064186	AT5G23900	AT5G23900.1	RPL13D	-	T	C	0.0204205	101	15.1801	1.2871e-30
5_3791327	AT5G11770	AT5G11770.1	AT5G11770	-	T	C	0.011089	134	6.93454	1.29881e-30
5_13711738	AT5G35530	AT5G35530.1	RPS3C	-	T	C	0.0163586	131	17.2411	1.41788e-30
3_1622027	AT3G05590	AT3G05590.1,AT3G05590.2	RPL18B	+	A	G	0.00417517	137	5.33177	1.44752e-30
5_555436	AT5G02500	AT5G02500.1,AT5G02500.2	MED37E	-	T	C	0.029807	366	3.2929	1.53768e-30
2_17460105	AT2G41840	AT2G41840.1	RPS2C	-	T	C	0.00668051	119	5.95741	1.76024e-30
4_17683132	AT4G37640	AT4G37640.1	ACA2	-	T	C	0.277439	91	15.5613	1.76095e-30
5_24015704	AT5G59613	AT5G59613.2,AT5G59613.1	AT5G59613	-	T	C	0.00654054	149	5.9513	1.81322e-30
3_18141017	AT3G48930	AT3G48930.1	RPS11A	-	T	C	0.0193095	151	6.07012	1.88219e-30
1_6223205	AT1G18080	AT1G18080.1	RACK1A	+	A	G	0.0139703	174	6.00806	1.93484e-30
1_2463673	AT1G07940	AT1G07940.1,AT1G07940.2,AT1G07940.3,AT1G07940.4	A3	-	T	C	0.0303407	171	5.442	1.93494e-30
5_18757788	AT5G46250	AT5G46250.1	LARP6A	+	A	G	0.0443583	103	15.3917	2.20156e-30
4_7010046	AT4G11600	AT4G11600.1	GPX6	-	T	C	0.0124347	188	5.40205	2.31186e-30
1_7953853	AT1G22520	AT1G22520.1,AT1G22520.2	AT1G22520	-	T	C	0.0647847	179	7.11409	2.41487e-30
4_14599774	AT4G29840	AT4G29840.1	TS1	-	T	C	0.0761905	192	3.49664	2.51079e-30
5_25749759	AT5G64400	AT5G64400.1,AT5G64400.2,AT5G64400.3	AT5G64400	+	A	G	0.0119411	184	6.99646	2.53091e-30
2_11764186	AT2G27530	AT2G27530.1,AT2G27530.2	RPL10AB	-	T	C	0.00836458	145	5.87862	2.56779e-30
5_9837004	AT5G27770	AT5G27770.1	RPL22C	+	A	G	0.0132192	244	7.0602	2.66372e-30
5_26549909	AT5G66510	AT5G66510.1,AT5G66510.2	GAMMACA3	-	T	C	0.0505689	120	7.02242	2.69295e-30
4_15789192	AT4G32720	AT4G32720.1,AT4G32720.2	LA1	+	A	G	0.0308858	106	15.3313	2.69583e-30
3_18504315	AT3G49910	AT3G49910.1	RPL26A	+	A	G	0.0115402	176	3.87066	2.82871e-30
4_16337578	AT4G34110	AT4G34110.1	PAB2	+	A	G	0.0272713	172	15.8825	2.92105e-30
1_21073048	AT1G56280	AT1G56280.1,AT1G56280.2	ATDI19	-	T	C	0.0305441	119	7.10865	3.18364e-30
2_8513133	AT2G19730	AT2G19730.1,AT2G19730.2,AT2G19730.3	RPL28A	+	A	G	0.0470046	102	15.4825	3.48392e-30
3_364203	AT3G02080	AT3G02080.1	RPS19A	-	T	C	0.0129643	156	6.01381	3.62885e-30
1_17454146	AT1G47530	AT1G47530.1,AT1G47530.2	AT1G47530	+	A	G	0.126615	196	4.54371	3.89033e-30
3_2615654	AT3G08610	AT3G08610.1	AT3G08610	-	T	C	0.0305586	279	5.96803	4.00887e-30
5_6764394	AT5G20020	AT5G20020.1	RAN2	+	A	G	0.0221333	94	16.8002	4.06758e-30
2_8124758	AT2G18740	AT2G18740.1,AT2G18740.2	AT2G18740	+	A	G	0.105799	135	16.6136	4.2733e-30
5_24290633	AT5G60390	AT5G60390.1,AT5G60390.2,AT5G60390.3	A3	+	A	G	0.00609461	151	5.47301	4.33821e-30
4_16336936	AT4G34110	AT4G34110.1	PAB2	+	A	G	0.0164109	185	5.2688	4.62738e-30
2_18250303	AT2G44120	AT2G44120.2,AT2G44120.1	RPL7C	-	T	C	0.0113689	147	5.2065	4.726e-30
4_8571968	AT4G15000	AT4G15000.1,AT4G15000.2	RPL27C	+	A	G	0.00736048	201	5.91643	4.80995e-30
5_22393463	AT5G55190	AT5G55190.1	RAN3	+	A	G	0.0206624	141	4.73868	4.93443e-30
4_11283331	AT4G21150	AT4G21150.1,AT4G21150.2	RPN2	+	A	G	0.0753904	140	7.11904	5.16205e-30
2_15350509	AT2G36620	AT2G36620.1	RPL24A	-	T	C	0.0355522	141	7.03817	5.34641e-30
3_2823406	AT3G09200	AT3G09200.1,AT3G09200.2	RPP0B	-	T	C	0.0107021	132	5.98178	5.45628e-30
1_9485819	AT1G27310	AT1G27310.1	NTF2A	-	T	C	0.0554843	173	6.95347	6.08122e-30
1_26191077	AT1G69620	AT1G69620.1	RPL34B	+	A	G	0.010523	101	15.2832	6.31238e-30
5_4447634	AT5G13780	AT5G13780.1	AT5G13780	-	T	C	0.048414	203	17.4612	6.45592e-30
3_5786681	AT3G16950	AT3G16950.2,AT3G16950.1	LPD1	-	T	C	0.0903901	95	17.0408	6.46413e-30
5_2669734	AT5G08300	AT5G08300.1	AT5G08300	+	A	G	0.0454128	99	6.86744	6.83948e-30
5_15472653	AT5G38660	AT5G38660.2	APE1	-	T	C	0.0252966	177	15.7421	7.25231e-30
1_27243081	AT1G72370	AT1G72370.1,AT1G72370.2	RPSAA	-	T	C	0.0144413	118	5.98796	7.57636e-30
1_5166387	AT1G14980	AT1G14980.1,AT1G14980.2	CPN10	-	T	C	0.0153061	219	6.95006	7.60399e-30
1_17321277	AT1G47260	AT1G47260.1	GAMMACA2	-	T	C	0.0587669	122	15.8142	7.94389e-30
5_25735487	AT5G64350	AT5G64350.1	FKBP12	-	T	C	0.00613278	206	17.4608	8.28744e-30
5_25665106	AT5G64130	AT5G64130.1,AT5G64130.2,AT5G64130.3	AT5G64130	-	T	C	0.0171654	183	7.18883	8.39744e-30
5_22824885	AT5G56360	AT5G56360.1	PSL4	-	T	C	0.0940514	117	14.8659	8.67652e-30
2_14157409	AT2G33410	AT2G33410.1	AT2G33410	+	A	G	0.0589143	191	2.79194	8.92928e-30
4_6174935	AT4G09800	AT4G09800.1	RPS18A	+	A	G	0.0302898	208	7.07195	9.22622e-30
1_6913508	AT1G19910	AT1G19910.1,AT1G19910.2	VHA-C2	+	A	G	0.0100744	176	4.95442	9.64371e-30
3_730084	AT3G03160	AT3G03160.1	AT3G03160	+	A	G	0.0241866	113	15.8985	9.92798e-30
2_17698031	AT2G42500	AT2G42500.1,AT2G42500.2	PP2A4	-	T	C	0.110359	212	4.46881	1.00178e-29
1_29304138	AT1G77940	AT1G77940.1	RPL30B	-	T	C	0.011284	132	17.209	1.03452e-29
1_10639762	AT1G30230	AT1G30230.1,AT1G30230.2	AT1G30230	+	A	G	0.0145048	175	4.92743	1.07581e-29
4_18113481	AT4G38800	AT4G38800.1	MTN1	-	T	C	0.0602796	263	4.62981	1.0855e-29
1_1216368	AT1G04480	AT1G04480.1	RPL23C	+	A	G	0.00678072	109	16.3989	1.19181e-29
1_10993485	AT1G30880	AT1G30880.1,AT1G30880.2	AT1G30880	-	T	C	0.028291	196	18.1214	1.19181e-29
4_18257843	AT4G39200	AT4G39200.1,AT4G39200.2	RPS25E	+	A	G	0.00723776	207	4.40602	1.21801e-29
5_20342750	AT5G50000	AT5G50000.1,AT5G50000.2	AT5G50000	-	T	C	0.180851	85	16.8137	1.23552e-29
1_3155332	AT1G09740	AT1G09740.1,AT1G09740.2	AT1G09740	+	A	G	0.0317209	200	6.06525	1.29909e-29
3_2954162	AT3G09630	AT3G09630.1,AT3G09630.2	RPL4A	+	A	G	0.0217002	194	3.6148	1.33458e-29
1_23972073	AT1G64550	AT1G64550.1	ABCF3	+	A	G	0.0861953	128	4.93722	1.39811e-29
5_2543212	AT5G07960	AT5G07960.1	AT5G07960	+	A	G	0.028125	90	16.1871	1.44995e-29
1_29305131	AT1G77940	AT1G77940.1	RPL30B	-	T	C	0.00644397	136	16.3133	1.50562e-29
5_9689178	AT5G27430	AT5G27430.1	AT5G27430	+	A	G	0.153846	186	5.9993	1.55448e-29
3_10078313	AT3G27280	AT3G27280.1,AT3G27280.2	PHB4	+	A	G	0.0818584	148	16.7549	1.56112e-29
1_5711826	AT1G16700	AT1G16700.1	AT1G16700	+	A	G	0.054683	94	15.7508	1.65133e-29
3_2917852	AT3G09500	AT3G09500.1	RPL35A	+	A	G	0.0229272	245	7.10142	1.70483e-29
2_16918504	AT2G40510	AT2G40510.1	RPS26B	+	A	G	0.0329638	223	16.7622	1.71291e-29
2_12769344	AT2G29960	AT2G29960.1,AT2G29960.2	CYP19-4	-	T	C	0.0215508	102	6.81446	1.73169e-29
2_7548144	AT2G17360	AT2G17360.1,AT2G17360.2	RPS4A	+	A	G	0.0231693	162	7.03339	1.88335e-29
2_8514357	AT2G19740	AT2G19740.1	RPL31A	+	A	G	0.0456472	140	6.92048	1.88744e-29
4_16374048	AT4G34200	AT4G34200.1	PGDH1	-	T	C	0.0484313	159	7.12581	1.94471e-29
5_5094037	AT5G15650	AT5G15650.1	RGP2	+	A	G	0.0103898	113	4.99094	2.07057e-29
2_18205475	AT2G43970	AT2G43970.1,AT2G43970.2	LARP6B	-	T	C	0.0535433	272	6.93078	2.15078e-29
1_1142748	AT1G04270	AT1G04270.1,AT1G04270.2	RPS15A	-	T	C	0.00796933	212	6.7735	2.23902e-29
1_25235941	AT1G67350	AT1G67350.1,AT1G67350.2	AT1G67350	+	A	G	0.0114026	113	5.83526	2.36416e-29
2_13412088	AT2G31490	AT2G31490.1	AT2G31490	+	A	G	0.0156202	151	6.86232	2.4268e-29
5_9873623	AT5G27850	AT5G27850.1,AT5G27850.2	RPL18C	+	A	G	0.00509722	124	4.9048	2.43569e-29
5_13710661	AT5G35530	AT5G35530.1	RPS3C	-	T	C	0.00790829	109	5.83994	2.45449e-29
1_23834957	AT1G64230	AT1G64230.1,AT1G64230.4,AT1G64230.3	UBC28	+	A	G	0.0214856	269	4.13195	2.6658e-29
5_534384	AT5G02450	AT5G02450.1	RPL36C	+	A	G	0.0118734	99	6.80574	2.90694e-29
3_9150528	AT3G25120	AT3G25120.1	AT3G25120	-	T	C	0.142857	213	3.82163	2.99541e-29
1_4947358	AT1G14450	AT1G14450.2,AT1G14450.1	AT1G14450	-	T	C	0.00926186	99	15.0513	3.01965e-29
5_16913615	AT5G42300	AT5G42300.1	UBL5	-	T	C	0.0117697	168	17.226	3.19809e-29
4_10302426	AT4G18730	AT4G18730.1	RPL11B	+	A	G	0.0121046	225	6.95517	3.35588e-29
5_7107988	AT5G20950	AT5G20950.3,AT5G20950.1	AT5G20950	-	T	C	0.048	114	15.5063	3.46706e-29
3_19955856	AT3G53890	AT3G53890.1,AT3G53890.2	RPS21B	-	T	C	0.0181386	343	4.49065	3.67153e-29
2_17461223	AT2G41840	AT2G41840.1	RPS2C	-	T	C	0.00966479	284	3.75513	4.15496e-29
3_20337481	AT3G54880	AT3G54880.1	AT3G54880	-	T	C	0.030754	93	6.96112	4.18265e-29
5_9692893	AT5G27450	AT5G27450.1,AT5G27450.2,AT5G27450.3	MVK	+	A	G	0.11793	98	5.43832	4.53699e-29
2_18046773	AT2G43460	AT2G43460.1	RPL38B	-	T	C	0.0110707	219	5.34017	4.57872e-29
1_5015017	AT1G14620	AT1G14620.1,AT1G14620.2	DECOY	-	T	C	0.105469	135	16.7293	4.67056e-29
3_22251730	AT3G60210	AT3G60210.1	AT3G60210	-	T	C	0.0913655	91	15.0686	4.91763e-29
1_27850147	AT1G74060	AT1G74060.1	RPL6B	-	T	C	0.0135117	101	5.88563	5.08793e-29
5_9836977	AT5G27770	AT5G27770.1	RPL22C	+	A	G	0.0141234	281	5.36665	5.10658e-29
1_27540489	AT1G73230	AT1G73230.1	AT1G73230	-	T	C	0.015084	105	5.35086	5.20412e-29
2_17461076	AT2G41840	AT2G41840.1	RPS2C	-	T	C	0.00781879	165	4.63938	5.40239e-29
5_865456	AT5G03460	AT5G03460.1	AT5G03460	+	A	G	0.0155543	110	17.2903	5.66157e-29
5_6689092	AT5G19780	AT5G19780.1	TUBA5	+	A	G	0.0655271	92	6.85291	5.75977e-29
5_23558845	AT5G58240	AT5G58240.1,AT5G58240.3,AT5G58240.2	FHIT	-	T	C	0.0674967	103	6.81339	5.83984e-29
1_9171817	AT1G26550	AT1G26550.1	AT1G26550	+	A	G	0.0279894	169	4.56661	6.39921e-29
3_2953994	AT3G09630	AT3G09630.1,AT3G09630.2	RPL4A	+	A	G	0.0231524	255	5.30062	6.59429e-29
2_18799824	AT2G45640	AT2G45640.1,AT2G45640.2	SAP18	-	T	C	0.110867	101	15.2955	6.65653e-29
4_18114961	AT4G38800	AT4G38800.1	MTN1	-	T	C	0.0117492	107	6.74562	6.81392e-29
5_6557537	AT5G19440	AT5G19440.1	AT5G19440	+	A	G	0.0179974	110	5.81513	7.33338e-29
5_19091973	AT5G47030	AT5G47030.1	AT5G47030	+	A	G	0.0207501	135	16.6837	7.54846e-29
5_3556681	AT5G11170	AT5G11170.1,AT5G11170.2	RH15	+	A	G	0.0392332	88	15.2314	7.7883e-29
1_3663690	AT1G10950	AT1G10950.1	TMN1	+	A	G	0.08285	100	6.89014	7.96018e-29
2_7838059	AT2G18020	AT2G18020.1	RPL8A	+	A	G	0.00963054	165	3.61127	7.9641e-29
2_7989686	AT2G18400	AT2G18400.1	AT2G18400	-	T	C	0.0930481	87	15.1092	8.3677e-29
5_5247176	AT5G16060	AT5G16060.1	AT5G16060	+	A	G	0.0601213	109	15.7659	8.40068e-29
5_21355690	AT5G52650	AT5G52650.1	RPS10C	-	T	C	0.0378817	98	6.82859	8.51671e-29
1_10639526	AT1G30230	AT1G30230.1,AT1G30230.2	AT1G30230	+	A	G	0.0135461	219	4.24036	8.88838e-29
1_26190107	AT1G69620	AT1G69620.1	RPL34B	+	A	G	0.00671897	161	4.23792	9.72455e-29
4_15207369	AT4G31340	AT4G31340.1,AT4G31340.2	AT4G31340	+	A	G	0.0538786	166	3.49609	1.01013e-28
3_17786339	AT3G48170	AT3G48170.1	ALDH10A9	-	T	C	0.0392273	132	16.6585	1.02527e-28
3_1621879	AT3G05590	AT3G05590.1,AT3G05590.2	RPL18B	+	A	G	0.00503004	139	5.15999	1.03482e-28
2_9072913	AT2G21170	AT2G21170.1,AT2G21170.2	TIM	-	T	C	0.0173492	111	6.7129	1.05846e-28
1_7879274	AT1G22300	AT1G22300.1,AT1G22300.2,AT1G22300.3	GRF10	-	T	C	0.0249731	116	6.87496	1.1569e-28
4_14030001	AT4G28360	AT4G28360.1	AT4G28360	-	T	C	0.0691198	139	5.86415	1.26068e-28
1_12370216	AT1G34030	AT1G34030.1	RPS18A	-	T	C	0.0365903	91	6.84437	1.40863e-28
2_8788994	AT2G20360	AT2G20360.1	AT2G20360	+	A	G	0.0333603	165	5.41992	1.43652e-28
5_19789303	AT5G48810	AT5G48810.1	CYTB5-D	-	T	C	0.015208	102	17.2316	1.48598e-28
4_18415237	AT4G39680	AT4G39680.1,AT4G39680.2	AT4G39680	-	T	C	0.202417	201	2.62643	1.49033e-28
5_4945447	AT5G15230	AT5G15230.1,AT5G15230.2	GASA4	+	A	G	0.0353067	430	1.95436	1.60524e-28
2_8964843	AT2G20820	AT2G20820.1,AT2G20820.2	AT2G20820	+	A	G	0.00634819	99	17.7763	1.83102e-28
3_20337672	AT3G54880	AT3G54880.1	AT3G54880	-	T	C	0.0433991	143	5.07301	1.90612e-28
5_20155476	AT5G49650	AT5G49650.1,AT5G49650.2	XK-2	+	A	G	0.153043	88	15.9709	1.94565e-28
3_5051732	AT3G15000	AT3G15000.1	MORF8	+	A	G	0.0617252	239	4.26017	1.9642e-28
2_452114	AT2G01970	AT2G01970.1	TMN3	-	T	C	0.0906433	93	15.0593	1.97271e-28
3_23227904	AT3G62810	AT3G62810.1,AT3G62810.2	AT3G62810	+	A	G	0.0475699	507	3.30767	1.99524e-28
4_16540830	AT4G34640	AT4G34640.1,AT4G34640.2	SQS1	+	A	G	0.188724	318	2.98834	2.09163e-28
5_659482	AT5G02870	AT5G02870.1,AT5G02870.2	RPL4D	+	A	G	0.0141125	142	17.1375	2.13997e-28
5_26959352	AT5G67590	AT5G67590.1	FRO1	+	A	G	0.0230784	121	5.85813	2.13997e-28
1_28593421	AT1G76200	AT1G76200.1	AT1G76200	+	A	G	0.0114838	214	6.86563	2.14674e-28
5_9807490	AT5G27700	AT5G27700.1	RPS21C	-	T	C	0.0155318	99	17.6878	2.21637e-28
4_13594505	AT4G27090	AT4G27090.1	RPL14B	-	T	C	0.0047516	213	4.11132	2.2584e-28
1_18661004	AT1G50370	AT1G50370.1	FYPP1	+	A	G	0.0556937	112	4.66385	2.3706e-28
1_27847257	AT1G74050	AT1G74050.1	RPL6C	-	T	C	0.0384932	187	17.192	2.46404e-28
5_24281485	AT5G60360	AT5G60360.1,AT5G60360.3,AT5G60360.2	ALEU	+	A	G	0.0102292	104	6.8477	2.50393e-28
1_539818	AT1G02560	AT1G02560.1	CLPP5	+	A	G	0.111882	129	6.9846	2.59423e-28
4_9917958	AT4G17830	AT4G17830.1,AT4G17830.2	AT4G17830	+	A	G	0.144105	132	5.39289	2.59858e-28
1_18285702	AT1G49410	AT1G49410.1	TOM6	-	T	C	0.0200745	124	16.5328	2.65713e-28
3_4592570	AT3G13920	AT3G13920.5,AT3G13920.1,AT3G13920.3,AT3G13920.2	TIF4A-1	-	T	C	0.0156345	128	6.90541	2.74327e-28
2_8832674	AT2G20490	AT2G20490.1,AT2G20490.2	NOP10	+	A	G	0.0395335	200	6.95528	2.97818e-28
2_18208187	AT2G43970	AT2G43970.1,AT2G43970.2	LARP6B	-	T	C	0.105079	120	15.0125	3.01488e-28
5_534079	AT5G02450	AT5G02450.1	RPL36C	+	A	G	0.0141457	316	5.8502	3.18081e-28
4_6174928	AT4G09800	AT4G09800.1	RPS18A	+	A	G	0.0272421	202	6.89284	3.30001e-28
1_19475214	AT1G52300	AT1G52300.1	RPL37B	-	T	C	0.00768681	129	18.0475	3.31261e-28
1_21377834	AT1G57720	AT1G57720.1,AT1G57720.2	AT1G57720	+	A	G	0.0465521	241	5.74949	3.48678e-28
4_1295558	AT4G02930	AT4G02930.1	TUFA	-	T	C	0.112434	85	15.9892	3.55402e-28
3_18141287	AT3G48930	AT3G48930.1	RPS11A	-	T	C	0.0108262	171	18.5655	3.57797e-28
5_23516360	AT5G58110	AT5G58110.1	AT5G58110	+	A	G	0.0480379	213	5.35279	3.60296e-28
2_14075351	AT2G33210	AT2G33210.1,AT2G33210.2	HSP60-2	-	T	C	0.0632158	138	5.86902	3.72828e-28
5_19092106	AT5G47030	AT5G47030.1	AT5G47030	+	A	G	0.0259905	143	6.92	4.12928e-28
1_21356330	AT1G57660	AT1G57660.1	RPL21F	+	A	G	0.0239023	184	5.91492	4.49879e-28
1_19475372	AT1G52300	AT1G52300.1	RPL37B	-	T	C	0.0092353	207	4.70854	4.50921e-28
5_18382183	AT5G45350	AT5G45350.1,AT5G45350.3	AT5G45350	-	T	C	0.0529628	101	5.83225	4.55306e-28
1_50923	AT1G01100	AT1G01100.1,AT1G01100.3	RPP1A	-	T	C	0.00495373	106	6.68956	4.55672e-28
3_8608021	AT3G23830	AT3G23830.1,AT3G23830.2	RBG4	-	T	C	0.0893547	162	3.34376	4.60002e-28
5_2828494	AT5G08690	AT5G08690.1	AT5G08690	+	A	G	0.0237844	90	6.80931	4.6231e-28
1_24559690	AT1G65980	AT1G65980.1	PRXIIB	-	T	C	0.012265	184	5.8605	4.64005e-28
2_15648189	AT2G37270	AT2G37270.1,AT2G37270.2	RPS5A	-	T	C	0.0251947	207	5.3441	4.69106e-28
2_13370769	AT2G31350	AT2G31350.1,AT2G31350.2,AT2G31350.3	GLX2-5	+	A	G	0.0948276	77	15.2604	4.8569e-28
1_2537659	AT1G08110	AT1G08110.4,AT1G08110.1	AT1G08110	+	A	G	0.0418982	98	6.87298	4.9384e-28
5_4935166	AT5G15200	AT5G15200.1	RPS9B	-	T	C	0.00691686	101	5.80811	4.97632e-28
1_18986187	AT1G51200	AT1G51200.1,AT1G51200.2,AT1G51200.3,AT1G51200.4	SAP2	+	A	G	0.01606	90	6.80008	5.046e-28
5_26080761	AT5G65260	AT5G65260.1	PABN2	-	T	C	0.126996	167	7.0197	5.06846e-28
1_12024474	AT1G33140	AT1G33140.1	RPL9B	+	A	G	0.0056805	98	6.72491	5.22261e-28
2_7642468	AT2G17560	AT2G17560.1,AT2G17560.3	HMGB4	-	T	C	0.0480996	143	6.8648	5.95594e-28
3_19505766	AT3G52590	AT3G52590.1	RPL40B	+	A	G	0.00595671	131	6.76385	5.98798e-28
1_4946299	AT1G14450	AT1G14450.2,AT1G14450.1	AT1G14450	-	T	C	0.155323	89	6.80887	6.06852e-28
1_12023999	AT1G33140	AT1G33140.1	RPL9B	+	A	G	0.0100159	164	4.7769	6.32059e-28
3_4911767	AT3G14600	AT3G14600.1	RPL18AC	+	A	G	0.011875	95	5.8291	6.92446e-28
3_17449672	AT3G47350	AT3G47350.2,AT3G47350.1	HSD2	+	A	G	0.027978	132	4.9085	7.00254e-28
2_14176584	AT2G33470	AT2G33470.1,AT2G33470.2	GLTP1	-	T	C	0.0341415	138	6.93526	7.17704e-28
1_19884648	AT1G53310	AT1G53310.1,AT1G53310.2,AT1G53310.3	PPC1	-	T	C	0.036234	122	4.26944	7.39774e-28
2_11819046	AT2G27720	AT2G27720.1,AT2G27720.4,AT2G27720.3,AT2G27720.2	RPP2A	+	A	G	0.0119694	247	5.33561	7.54846e-28
4_10302749	AT4G18730	AT4G18730.1	RPL11B	+	A	G	0.0152822	271	4.3675	7.93206e-28
1_24540118	AT1G65930	AT1G65930.1	CICDH	+	A	G	0.0105042	145	3.56976	8.05265e-28
4_8055206	AT4G13940	AT4G13940.1,AT4G13940.4,AT4G13940.3	SAHH1	+	A	G	0.00963745	210	3.59351	8.14919e-28
3_2917676	AT3G09500	AT3G09500.1	RPL35A	+	A	G	0.00952766	212	4.97697	8.50726e-28
1_22719369	AT1G61570	AT1G61570.1	TIM13	-	T	C	0.0365585	249	5.7978	9.00795e-28
1_29746692	AT1G79075	AT1G79075.1,AT1G79075.2	AT1G79075	+	A	G	0.0427641	151	16.5798	9.1472e-28
4_16568268	AT4G34720	AT4G34720.1,AT4G34720.2	VHA-C3	-	T	C	0.0213212	183	4.64417	9.56012e-28
3_87625	AT3G01280	AT3G01280.1	VDAC1	+	A	G	0.018926	123	5.8868	9.87572e-28
3_6866507	AT3G19760	AT3G19760.1	RH2	+	A	G	0.132765	109	15.6404	1.00983e-27
3_1605685	AT3G05530	AT3G05530.1	RPT5A	+	A	G	0.0425844	174	6.98726	1.03323e-27
5_554833	AT5G02500	AT5G02500.1,AT5G02500.2	MED37E	-	T	C	0.00915044	211	4.25272	1.07267e-27
2_18206060	AT2G43970	AT2G43970.1,AT2G43970.2	LARP6B	-	T	C	0.0305243	209	5.23852	1.10394e-27
1_27243149	AT1G72370	AT1G72370.1,AT1G72370.2	RPSAA	-	T	C	0.00866238	120	4.46294	1.15873e-27
1_7420477	AT1G21190	AT1G21190.1	LSM3A	-	T	C	0.0711911	257	4.34055	1.26093e-27
5_16952633	AT5G42390	AT5G42390.1	AT5G42390	+	A	G	0.161864	191	4.49003	1.30683e-27
3_17453811	AT3G47370	AT3G47370.1,AT3G47370.2,AT3G47370.3	RPS20B	-	T	C	0.0162626	161	5.24607	1.35427e-27
1_5203508	AT1G15120	AT1G15120.2,AT1G15120.1	AT1G15120	+	A	G	0.0112238	156	5.75716	1.44319e-27
2_17625325	AT2G42310	AT2G42310.1	AT2G42310	+	A	G	0.0119158	116	17.2503	1.49968e-27
3_2411600	AT3G07560	AT3G07560.1	PEX13	-	T	C	0.0580452	136	15.7753	1.61744e-27
5_25972414	AT5G65010	AT5G65010.1,AT5G65010.2	ASN2	+	A	G	0.267857	75	15.523	1.70974e-27
4_12792298	AT4G24820	AT4G24820.1,AT4G24820.2	RPN7	-	T	C	0.0205037	162	3.58484	1.73897e-27
4_9028524	AT4G15910	AT4G15910.1	ATDI21	+	A	G	0.0259159	162	5.85952	1.77912e-27
3_3722100	AT3G11770	AT3G11770.1	AT3G11770	-	T	C	0.145497	189	2.82411	1.92495e-27
3_10077623	AT3G27280	AT3G27280.1,AT3G27280.2	PHB4	+	A	G	0.045719	110	15.2587	1.95764e-27
5_3258772	AT5G10360	AT5G10360.1,AT5G10360.2	RPS6B	-	T	C	0.0115676	116	5.8573	2.01305e-27
5_3035791	AT5G09770	AT5G09770.1	AT5G09770	-	T	C	0.0196145	115	5.72738	2.05559e-27
5_1323731	AT5G04600	AT5G04600.1	AT5G04600	+	A	G	0.0470058	146	6.79004	2.06869e-27
4_8198253	AT4G14220	AT4G14220.1	RHF1A	+	A	G	0.16184	95	15.8959	2.16036e-27
3_5455515	AT3G16080	AT3G16080.1,AT3G16080.2	RPL37C	+	A	G	0.0155138	207	17.1429	2.34191e-27
3_4562090	AT3G13860	AT3G13860.1	HSP60-3A	-	T	C	0.0852995	94	6.75575	2.40903e-27
3_284907	AT3G01790	AT3G01790.1,AT3G01790.3	AT3G01790	-	T	C	0.0470659	235	5.75615	2.52118e-27
3_2455656	AT3G07680	AT3G07680.1	AT3G07680	+	A	G	0.022534	106	6.6615	2.54155e-27
4_17329859	AT4G36760	AT4G36760.1,AT4G36760.2,AT4G36760.3	ATAPP1	+	A	G	0.12963	140	5.91472	2.60629e-27
5_24016511	AT5G59613	AT5G59613.2	AT5G59613	-	T	C	0.0141556	199	5.85237	2.70395e-27
3_22402400	AT3G60600	AT3G60600.1,AT3G60600.3,AT3G60600.2	PVA11	+	A	G	0.022296	94	16.384	2.95686e-27
1_519351	AT1G02500	AT1G02500.1,AT1G02500.2	SAM1	+	A	G	0.0318457	284	3.16965	3.04618e-27
1_18985861	AT1G51200	AT1G51200.1,AT1G51200.2,AT1G51200.3,AT1G51200.4	SAP2	+	A	G	0.0285277	205	4.04337	3.25757e-27
5_10069772	AT5G28060	AT5G28060.1	RPS24B	-	T	C	0.00876018	85	16.4689	3.3486e-27
1_3159473	AT1G09760	AT1G09760.1	U2A'	-	T	C	0.105005	193	5.92538	3.50116e-27
5_7937203	AT5G23535	AT5G23535.1,AT5G23535.2	AT5G23535	+	A	G	0.105155	102	5.8925	3.50365e-27
5_16676116	AT5G41700	AT5G41700.1,AT5G41700.3,AT5G41700.4	UBC8	+	A	G	0.0292687	325	3.57868	3.51357e-27
3_20829045	AT3G56130	AT3G56130.1,AT3G56130.2,AT3G56130.5,AT3G56130.4,AT3G56130.3	AT3G56130	+	A	G	0.0641458	95	6.76227	3.51588e-27
2_18139584	AT2G43790	AT2G43790.1	MPK6	+	A	G	0.115462	115	4.84079	3.84947e-27
4_18257861	AT4G39200	AT4G39200.1,AT4G39200.2	RPS25E	+	A	G	0.00370164	126	4.47875	3.88283e-27
1_608588	AT1G02780	AT1G02780.1	RPL19A	-	T	C	0.00390491	91	17.1308	4.04754e-27
1_8080258	AT1G22840	AT1G22840.1,AT1G22840.2	CYTC-1	+	A	G	0.00962904	122	5.26307	4.13847e-27
3_2606602	AT3G08580	AT3G08580.1,AT3G08580.2	AAC1	-	T	C	0.00338349	105	6.56548	4.47072e-27
3_6242319	AT3G18215	AT3G18215.1,AT3G18215.2	AT3G18215	+	A	G	0.187364	86	6.79114	4.82051e-27
4_7993399	AT4G13780	AT4G13780.1	AT4G13780	-	T	C	0.0917327	81	6.87218	4.90365e-27
4_252176	AT4G00585	AT4G00585.1	AT4G00585	-	T	C	0.0180979	204	5.56108	5.00984e-27
1_4375840	AT1G12840	AT1G12840.1	VHA-C	+	A	G	0.0234128	170	5.74701	5.40542e-27
1_10640043	AT1G30230	AT1G30230.1,AT1G30230.2	AT1G30230	+	A	G	0.00795927	111	5.66598	5.48219e-27
1_5625493	AT1G16470	AT1G16470.1,AT1G16470.2	PAB1	+	A	G	0.109479	82	15.3809	5.61991e-27
3_6241111	AT3G18215	AT3G18215.1,AT3G18215.2	AT3G18215	+	A	G	0.0395315	108	15.0272	6.06298e-27
5_22172167	AT5G54580	AT5G54580.1	AT5G54580	+	A	G	0.0536723	114	4.8291	6.11518e-27
5_9098900	AT5G26030	AT5G26030.1,AT5G26030.2	HEM15	+	A	G	0.270452	281	1.66942	6.50196e-27
5_25734790	AT5G64350	AT5G64350.1	FKBP12	-	T	C	0.0120324	119	16.8755	6.93183e-27
5_22944060	AT5G56710	AT5G56710.1,AT5G56710.2	RPL31C	-	T	C	0.0160686	163	5.21582	6.99529e-27
4_10505001	AT4G19210	AT4G19210.1	ABCE2	+	A	G	0.0658343	116	6.88129	7.1282e-27
3_16909561	AT3G46010	AT3G46010.1,AT3G46010.2	ADF1	-	T	C	0.0557238	92	16.3592	7.19272e-27
5_25393270	AT5G63400	AT5G63400.1,AT5G63400.2	ADK1	-	T	C	0.0233542	149	4.89361	7.37897e-27
3_23053043	AT3G62290	AT3G62290.1,AT3G62290.2,AT3G62290.3	ARFA1E	+	A	G	0.00391119	102	5.21366	7.41319e-27
5_25749780	AT5G64400	AT5G64400.1,AT5G64400.2,AT5G64400.3	AT5G64400	+	A	G	0.0121387	168	6.77372	7.43829e-27
5_815431	AT5G03345	AT5G03345.1,AT5G03345.2	AT5G03345	+	A	G	0.0448663	104	17.4785	8.14479e-27
3_10153584	AT3G27430	AT3G27430.2,AT3G27430.3,AT3G27430.1	PBB1	+	A	G	0.022718	111	5.68065	8.43309e-27
2_14806025	AT2G35120	AT2G35120.1	GDH2	-	T	C	0.0115737	154	5.12183	8.45486e-27
4_16339245	AT4G34110	AT4G34110.1	PAB2	+	A	G	0.0104167	109	16.9798	9.02129e-27
1_21380187	AT1G57720	AT1G57720.1,AT1G57720.2	AT1G57720	+	A	G	0.0247286	82	16.5672	1.08467e-26
2_7741705	AT2G17800	AT2G17800.1,AT2G17800.2	ARAC1	+	A	G	0.0929705	123	16.4478	1.117e-26
1_11411558	AT1G31812	AT1G31812.1	ACBP6	-	T	C	0.00622648	182	3.8128	1.13452e-26
4_15346284	AT4G31700	AT4G31700.1,AT4G31700.2	RPS6A	-	T	C	0.0122109	113	15.4842	1.19935e-26
4_1042971	AT4G02370	AT4G02370.1	AT4G02370	+	A	G	0.0535007	81	5.86211	1.20692e-26
1_9533810	AT1G27450	AT1G27450.2,AT1G27450.1,AT1G27450.3	APT1	+	A	G	0.0104642	117	16.0814	1.24318e-26
1_4638988	AT1G13560	AT1G13560.1,AT1G13560.3,AT1G13560.2	AAPT1	-	T	C	0.0722175	85	16.184	1.25316e-26
3_368539	AT3G02090	AT3G02090.1,AT3G02090.2	MPPBETA	+	A	G	0.0119389	79	15.5405	1.27331e-26
5_6657378	AT5G19690	AT5G19690.1,AT5G19690.2	STT3A	+	A	G	0.0351696	113	4.81611	1.31621e-26
5_209564	AT5G01530	AT5G01530.1	LHCB4.1	+	A	G	0.0549044	89	6.70656	1.3341e-26
5_23620884	AT5G58420	AT5G58420.1	RPS4D	+	A	G	0.0222768	118	16.3699	1.3379e-26
3_20562539	AT3G55460	AT3G55460.1	SCL30	+	A	G	0.0403853	109	5.68349	1.3726e-26
2_9320621	AT2G21870	AT2G21870.1,AT2G21870.2	MGP1	-	T	C	0.0101865	124	4.8859	1.40563e-26
3_19810274	AT3G53430	AT3G53430.1	RPL12B	-	T	C	0.00843188	159	4.4275	1.4484e-26
5_22172396	AT5G54580	AT5G54580.1	AT5G54580	+	A	G	0.113535	203	3.27558	1.46939e-26
1_28530661	AT1G76010	AT1G76010.1,AT1G76010.2	AT1G76010	-	T	C	0.0208246	149	5.68588	1.51236e-26
1_608261	AT1G02780	AT1G02780.1	RPL19A	-	T	C	0.00365572	103	5.17786	1.52088e-26
1_26564276	AT1G70490	AT1G70490.1,AT1G70490.2,AT1G70490.3,AT1G70490.4,AT1G70490.5,AT1G70490.6,AT1G70490.7	ARF2-A	-	T	C	0.0187525	95	15.5969	1.52725e-26
2_13383536	AT2G31390	AT2G31390.1	AT2G31390	-	T	C	0.0256252	83	16.0106	1.56897e-26
5_6851720	AT5G20290	AT5G20290.1	RPS8A	-	T	C	0.0103365	188	6.95312	1.61863e-26
4_797415	AT4G01850	AT4G01850.1,AT4G01850.2	SAM2	-	T	C	0.010689	130	5.65629	1.63297e-26
3_16918981	AT3G46060	AT3G46060.1,AT3G46060.2,AT3G46060.3	RABE1C	+	A	G	0.052272	153	5.27731	1.67935e-26
2_8694773	AT2G20140	AT2G20140.1	RPT2B	+	A	G	0.0984781	110	6.83072	1.71867e-26
4_18148330	AT4G38920	AT4G38920.1,AT4G38920.2	VHA-C3	+	A	G	0.0101662	159	4.47436	1.79338e-26
1_10639266	AT1G30230	AT1G30230.1,AT1G30230.2	AT1G30230	+	A	G	0.0318066	150	3.79051	1.79718e-26
3_23090601	AT3G62400	AT3G62400.2	AT3G62400	+	A	G	0.0380307	146	17.1131	1.80812e-26
4_16549920	AT4G34670	AT4G34670.1	RPS3AB	+	A	G	0.00955414	99	5.20722	1.85618e-26
5_19092208	AT5G47030	AT5G47030.1	AT5G47030	+	A	G	0.063197	102	6.84918	1.9272e-26
3_14197251	AT3G41762	AT3G41762.1	AT3G41762	-	T	C	0.358147	1299	1.06028	1.94157e-26
5_6582199	AT5G19510	AT5G19510.1	AT5G19510	-	T	C	0.00957922	163	5.87857	2.10198e-26
2_12826292	AT2G30050	AT2G30050.1	SEC13B	+	A	G	0.0352406	93	15.0245	2.11373e-26
1_28528464	AT1G76010	AT1G76010.1,AT1G76010.2	AT1G76010	-	T	C	0.036308	166	4.17405	2.15258e-26
4_16338156	AT4G34110	AT4G34110.1	PAB2	+	A	G	0.00932587	105	5.67756	2.20311e-26
2_10685887	AT2G25110	AT2G25110.1	SDF2	+	A	G	0.0760431	113	16.1485	2.25666e-26
1_5402215	AT1G15690	AT1G15690.1,AT1G15690.2	AVP1	+	A	G	0.0175894	88	16.5485	2.41342e-26
4_18012304	AT4G38510	AT4G38510.5,AT4G38510.1	VHA-B2	-	T	C	0.0544518	148	17.6538	2.4296e-26
2_11866406	AT2G27860	AT2G27860.1	AXS1	-	T	C	0.0366558	203	4.73792	2.53198e-26
3_19398115	AT3G52300	AT3G52300.1,AT3G52300.2	ATPQ	+	A	G	0.0262634	330	5.90971	2.66305e-26
4_251084	AT4G00585	AT4G00585.1	AT4G00585	-	T	C	0.0957973	155	5.89539	2.6693e-26
1_29304105	AT1G77940	AT1G77940.1	RPL30B	-	T	C	0.0150294	138	4.94806	2.69758e-26
3_21718840	AT3G58730	AT3G58730.1	VHA-D	-	T	C	0.0242826	132	6.77758	2.73822e-26
5_24893037	AT5G61970	AT5G61970.1	AT5G61970	+	A	G	0.219577	166	6.97183	2.77082e-26
2_12253778	AT2G28600	AT2G28600.1	AT2G28600	+	A	G	0.14158	95	15.6355	2.84431e-26
2_14805800	AT2G35120	AT2G35120.1	GDH2	-	T	C	0.0415288	113	17.3285	2.93399e-26
2_8807784	AT2G20420	AT2G20420.1	AT2G20420	+	A	G	0.0132485	102	4.84004	3.09886e-26
3_1605777	AT3G05530	AT3G05530.1	RPT5A	+	A	G	0.0278103	95	4.8849	3.27645e-26
3_19810218	AT3G53430	AT3G53430.1	RPL12B	-	T	C	0.00768348	154	5.23999	3.46687e-26
3_3399912	AT3G10860	AT3G10860.1,AT3G10860.2	AT3G10860	+	A	G	0.00913486	291	5.13162	3.52433e-26
1_26127192	AT1G69510	AT1G69510.1,AT1G69510.2,AT1G69510.3	AT1G69510	+	A	G	0.0194536	136	5.25952	3.74129e-26
5_20951188	AT5G51570	AT5G51570.1	HIR4	+	A	G	0.0885609	96	17.0909	3.81161e-26
1_5677309	AT1G16610	AT1G16610.1,AT1G16610.2,AT1G16610.6,AT1G16610.5,AT1G16610.3,AT1G16610.4	SR45	-	T	C	0.0838369	111	16.8013	4.3114e-26
1_29803700	AT1G79230	AT1G79230.1,AT1G79230.3,AT1G79230.2	STR1	+	A	G	0.033321	90	5.74712	4.41782e-26
1_50558	AT1G01100	AT1G01100.1,AT1G01100.3	RPP1A	-	T	C	0.00885154	237	4.78363	4.48632e-26
5_4308713	AT5G13440	AT5G13440.1	AT5G13440	-	T	C	0.0447289	311	2.68165	4.50836e-26
4_9644877	AT4G17170	AT4G17170.1	RABB1C	-	T	C	0.100083	121	6.92946	4.56117e-26
1_24249027	AT1G65290	AT1G65290.1	MTACP2	-	T	C	0.0156334	116	6.74893	4.59489e-26
3_17779274	AT3G48140	AT3G48140.1	T24C20_20	+	A	G	0.00452108	102	5.75051	4.62098e-26
4_8302176	AT4G14420	AT4G14420.1	AT4G14420	-	T	C	0.0238446	81	15.9722	4.70891e-26
1_2408435	AT1G07770	AT1G07770.1,AT1G07770.2,AT1G07770.3	RPS15AA	-	T	C	0.0105637	134	5.22244	4.9939e-26
1_28152181	AT1G74960	AT1G74960.2,AT1G74960.3	KAS2	-	T	C	0.103267	98	5.78456	5.15897e-26
4_16337760	AT4G34110	AT4G34110.1	PAB2	+	A	G	0.0234999	159	5.72918	5.26947e-26
5_7555232	AT5G22740	AT5G22740.1	CSLA2	-	T	C	0.0628601	120	4.02536	5.38794e-26
1_2159789	AT1G07030	AT1G07030.1	AT1G07030	-	T	C	0.107482	181	4.30051	5.64834e-26
2_134236	AT2G01250	AT2G01250.1,AT2G01250.2	RPL7B	-	T	C	0.0126099	152	5.67394	5.99457e-26
5_22824581	AT5G56360	AT5G56360.1	PSL4	-	T	C	0.0945946	140	6.79801	6.01038e-26
2_133264	AT2G01250	AT2G01250.1,AT2G01250.2	RPL7B	-	T	C	0.00927115	130	5.19973	6.04196e-26
1_26112070	AT1G69460	AT1G69460.1	AT1G69460	-	T	C	0.037702	84	17.184	6.04703e-26
1_3136340	AT1G09690	AT1G09690.1	RPL21A	-	T	C	0.0206422	117	15.6497	6.3319e-26
4_37125	AT4G00100	AT4G00100.1	RPS13B	+	A	G	0.0599836	146	15.6107	6.37279e-26
5_15854177	AT5G39600	AT5G39600.1	AT5G39600	-	T	C	0.0714967	75	16.1971	6.40883e-26
1_5203891	AT1G15120	AT1G15120.2,AT1G15120.1	AT1G15120	+	A	G	0.00836786	103	16.3435	6.5074e-26
2_13370802	AT2G31350	AT2G31350.1,AT2G31350.2,AT2G31350.3	GLX2-5	+	A	G	0.0910308	68	15.2014	6.73544e-26
1_4608488	AT1G13440	AT1G13440.1,AT1G13440.2	GAPC2	-	T	C	0.00493856	127	3.91028	6.74935e-26
5_24290250	AT5G60390	AT5G60390.1,AT5G60390.2,AT5G60390.3	A3	+	A	G	0.00282352	95	6.56475	6.98043e-26
5_8438861	AT5G24650	AT5G24650.1	AT5G24650	+	A	G	0.11099	102	17.2119	7.05132e-26
5_25546609	AT5G63840	AT5G63840.2,AT5G63840.1	PSL5	+	A	G	0.0692226	130	6.6985	7.20353e-26
5_18503797	AT5G45620	AT5G45620.1,AT5G45620.2	RPN9A	+	A	G	0.126437	132	15.4988	7.46952e-26
3_4561759	AT3G13860	AT3G13860.1	HSP60-3A	-	T	C	0.139683	88	5.76504	7.72981e-26
5_5989632	AT5G18110	AT5G18110.1	NCBP	-	T	C	0.0323602	92	6.63037	7.76877e-26
2_9553980	AT2G22490	AT2G22490.1,AT2G22490.2	CYCD2-1	-	T	C	0.177632	81	5.82799	8.057e-26
5_16315452	AT5G40770	AT5G40770.1	PHB3	-	T	C	0.0372029	108	15.0666	9.9704e-26
3_23432988	AT3G63460	AT3G63460.1,AT3G63460.2,AT3G63460.3	SEC31B	-	T	C	0.0812343	129	4.72633	1.00539e-25
4_16233532	AT4G33865	AT4G33865.1	RPS29A	-	T	C	0.0112284	183	16.5911	1.03288e-25
1_5203738	AT1G15120	AT1G15120.2,AT1G15120.1	AT1G15120	+	A	G	0.0160865	238	16.5175	1.03576e-25
3_20892727	AT3G56340	AT3G56340.1	RPS26C	-	T	C	0.00908222	114	6.65135	1.03713e-25
1_8263407	AT1G23290	AT1G23290.1	RPL27AB	+	A	G	0.0168343	149	4.46033	1.05154e-25
5_2827655	AT5G08690	AT5G08690.1	AT5G08690	+	A	G	0.0172205	185	6.77545	1.06244e-25
4_18057353	AT4G38630	AT4G38630.1	RPN10	-	T	C	0.0435414	120	5.21281	1.09196e-25
4_12743940	AT4G24690	AT4G24690.1	AT4G24690	+	A	G	0.0188716	96	5.81248	1.12824e-25
5_4787298	AT5G14800	AT5G14800.1,AT5G14800.2	PROC1	-	T	C	0.029913	86	14.7557	1.16134e-25
3_17088603	AT3G46430	AT3G46430.1	AT3G46430	+	A	G	0.0245014	86	15.0357	1.16155e-25
1_5789048	AT1G16920	AT1G16920.1	RABA1B	-	T	C	0.0282523	86	16.0932	1.1722e-25
1_24839853	AT1G66580	AT1G66580.1	RPL10C	+	A	G	0.00992063	110	4.67814	1.20422e-25
5_23516523	AT5G58110	AT5G58110.1	AT5G58110	+	A	G	0.0711044	94	16.1218	1.23123e-25
3_15984840	AT3G44300	AT3G44300.1	NIT2	+	A	G	0.0117138	111	6.62423	1.3142e-25
1_20968202	AT1G56070	AT1G56070.1,AT1G56070.2,AT1G56070.3	LOS1	-	T	C	0.0192816	124	5.80788	1.35018e-25
5_22099019	AT5G54430	AT5G54430.1,AT5G54430.3,AT5G54430.2	ATPHOS32	-	T	C	0.0302913	156	6.79505	1.37149e-25
3_20543054	AT3G55410	AT3G55410.1,AT3G55410.2	AT3G55410	+	A	G	0.136416	239	2.46582	1.4048e-25
5_17622440	AT5G43830	AT5G43830.1	AT5G43830	-	T	C	0.0681173	72	16.7414	1.43096e-25
5_15904093	AT5G39740	AT5G39740.1,AT5G39740.2	RPL5B	+	A	G	0.0139553	146	5.70692	1.49922e-25
3_3400526	AT3G10860	AT3G10860.1,AT3G10860.2	AT3G10860	+	A	G	0.00896108	160	18.2125	1.50413e-25
3_9064788	AT3G24830	AT3G24830.1	RPL13AB	+	A	G	0.00477779	106	6.61668	1.63902e-25
1_28612274	AT1G76260	AT1G76260.1	DWA2	+	A	G	0.244138	177	3.657	1.64078e-25
5_3259660	AT5G10360	AT5G10360.1,AT5G10360.2	RPS6B	-	T	C	0.0968911	1979	1.71743	1.65297e-25
4_16233392	AT4G33865	AT4G33865.1	RPS29A	-	T	C	0.00755647	92	16.1227	1.7554e-25
5_4311368	AT5G13450	AT5G13450.1	ATP5	-	T	C	0.0125321	122	4.74025	1.82713e-25
1_17321409	AT1G47260	AT1G47260.1	GAMMACA2	-	T	C	0.0161778	91	6.67464	1.85536e-25
2_9237167	AT2G21580	AT2G21580.1,AT2G21580.2	RPS25B	+	A	G	0.00981053	160	4.12736	1.87854e-25
2_17625292	AT2G42310	AT2G42310.1	AT2G42310	+	A	G	0.0177417	151	4.54213	1.9434e-25
2_12416271	AT2G28910	AT2G28910.1,AT2G28910.2,AT2G28910.3	CXIP4	-	T	C	0.0193714	151	4.48245	1.94904e-25
3_2785018	AT3G09090	AT3G09090.1,AT3G09090.3,AT3G09090.2	DEX1	-	T	C	0.364198	295	2.01886	2.07144e-25
5_7214709	AT5G21274	AT5G21274.1	CAM6	-	T	C	0.0592255	130	15.8346	2.09562e-25
5_23032073	AT5G56940	AT5G56940.1	AT5G56940	+	A	G	0.0421175	109	6.69633	2.12685e-25
5_19790134	AT5G48810	AT5G48810.1	CYTB5-D	-	T	C	0.0112734	159	6.66422	2.13892e-25
2_7547821	AT2G17360	AT2G17360.1,AT2G17360.2	RPS4A	+	A	G	0.00887945	92	6.5871	2.18617e-25
4_17000437	AT4G35890	AT4G35890.1,AT4G35890.2	LARP1C	+	A	G	0.0949657	83	6.6586	2.27218e-25
4_15190502	AT4G31300	AT4G31300.1,AT4G31300.2	PBA1	+	A	G	0.0169931	131	15.2474	2.27792e-25
5_3791152	AT5G11770	AT5G11770.1	AT5G11770	-	T	C	0.0109964	98	6.6413	2.30193e-25
3_9064719	AT3G24830	AT3G24830.1	RPL13AB	+	A	G	0.0093585	179	5.56615	2.31114e-25
1_2408451	AT1G07770	AT1G07770.1,AT1G07770.2,AT1G07770.3	RPS15AA	-	T	C	0.012062	169	5.73676	2.41839e-25
2_12416299	AT2G28910	AT2G28910.1,AT2G28910.2,AT2G28910.3	CXIP4	-	T	C	0.02936	200	6.80199	2.4803e-25
5_7435341	AT5G22440	AT5G22440.1,AT5G22440.2	RPL10AC	-	T	C	0.0156047	84	6.62955	2.48469e-25
1_12024483	AT1G33140	AT1G33140.1	RPL9B	+	A	G	0.00514442	83	16.0546	2.56143e-25
4_14403281	AT4G29210	AT4G29210.1,AT4G29210.2	GGT3	+	A	G	0.150943	112	4.06532	2.66533e-25
1_3159444	AT1G09760	AT1G09760.1	U2A'	-	T	C	0.0484048	88	15.5395	2.67488e-25
5_17859848	AT5G44340	AT5G44340.1	TUBB4	-	T	C	0.0158151	91	5.18368	2.76168e-25
3_4783231	AT3G14350	AT3G14350.1,AT3G14350.3,AT3G14350.2	SRF7	-	T	C	0.108388	115	3.94993	2.98401e-25
2_9945840	AT2G23350	AT2G23350.1	PAB4	+	A	G	0.0266744	92	6.68095	3.14653e-25
1_11875313	AT1G32790	AT1G32790.1,AT1G32790.2	CID11	-	T	C	0.021609	83	16.2689	3.16995e-25
4_5315691	AT4G08390	AT4G08390.1,AT4G08390.3,AT4G08390.4	APXS	+	A	G	0.0931055	316	2.33285	3.19627e-25
5_19091814	AT5G47030	AT5G47030.1	AT5G47030	+	A	G	0.012855	105	6.72935	3.25371e-25
5_22383773	AT5G55160	AT5G55160.1,AT5G55160.2	SUMO2	-	T	C	0.0320804	99	16.9473	3.40302e-25
4_15520368	AT4G32130	AT4G32130.1	AT4G32130	-	T	C	0.0370701	83	15.0701	3.46194e-25
1_9563862	AT1G27530	AT1G27530.1	AT1G27530	-	T	C	0.0212481	111	5.61977	3.5785e-25
2_490247	AT2G02050	AT2G02050.1	AT2G02050	+	A	G	0.0163297	84	15.8791	3.69565e-25
5_5037197	AT5G15520	AT5G15520.1	RPS19B	-	T	C	0.100829	73	15.8465	3.70762e-25
4_9773178	AT4G17520	AT4G17520.1	AT4G17520	+	A	G	0.0200133	90	16.2124	3.88825e-25
3_730106	AT3G03160	AT3G03160.1	AT3G03160	+	A	G	0.0297872	119	16.2115	3.8936e-25
5_2203638	AT5G07090	AT5G07090.1,AT5G07090.2	RPS4B	+	A	G	0.00774513	97	5.64641	3.94604e-25
3_4766415	AT3G14290	AT3G14290.1	PAE2	+	A	G	0.0713087	85	16.0947	4.00308e-25
4_13470301	AT4G26720	AT4G26720.1	PPX1	-	T	C	0.154176	72	16.571	4.08131e-25
5_20693033	AT5G50850	AT5G50850.1	PDH2	+	A	G	0.017301	85	6.63174	4.23805e-25
1_4150896	AT1G12230	AT1G12230.1,AT1G12230.2	AT1G12230	+	A	G	0.328358	66	15.9603	4.24672e-25
3_2117593	AT3G06700	AT3G06700.1,AT3G06700.2,AT3G06700.3	RPL29A	-	T	C	0.00836799	165	4.70861	4.35244e-25
2_11763454	AT2G27530	AT2G27530.1,AT2G27530.2	RPL10AB	-	T	C	0.00909006	97	6.67509	4.49632e-25
3_5207222	AT3G15410	AT3G15410.1,AT3G15410.2	AT3G15410	+	A	G	0.140171	82	6.76676	4.56911e-25
4_16337663	AT4G34110	AT4G34110.1	PAB2	+	A	G	0.0217028	169	3.57266	4.59442e-25
1_2460600	AT1G07930	AT1G07930.1,AT1G07930.2	A3	+	A	G	0.0200993	81	6.64143	4.64266e-25
4_346435	AT4G00810	AT4G00810.1,AT4G00810.2	RPP1B	-	T	C	0.00646136	124	4.70373	5.17729e-25
5_24281656	AT5G60360	AT5G60360.1,AT5G60360.3,AT5G60360.2	ALEU	+	A	G	0.0135481	143	6.81051	5.28949e-25
3_5301350	AT3G15640	AT3G15640.1,AT3G15640.2	COX5B-1	+	A	G	0.0167049	131	4.46877	5.66713e-25
3_365112	AT3G02080	AT3G02080.1	RPS19A	-	T	C	0.00974135	232	2.91891	5.73495e-25
3_19810252	AT3G53430	AT3G53430.1	RPL12B	-	T	C	0.00537102	103	5.06756	5.73495e-25
3_705708	AT3G03100	AT3G03100.1,AT3G03100.2	AT3G03100	-	T	C	0.0133379	117	5.22496	5.87142e-25
3_8088560	AT3G22845	AT3G22845.1,AT3G22845.2	AT3G22845	+	A	G	0.0340009	73	17.0851	6.10156e-25
5_7095033	AT5G20920	AT5G20920.1,AT5G20920.2	EMB1401	-	T	C	0.0241416	90	5.66581	6.11493e-25
5_25466311	AT5G63620	AT5G63620.1,AT5G63620.3,AT5G63620.2	AT5G63620	-	T	C	0.191214	74	16.3466	6.61391e-25
1_2637163	AT1G08360	AT1G08360.1	RPL10AA	+	A	G	0.00810334	101	5.66597	6.81677e-25
1_2637495	AT1G08360	AT1G08360.1	RPL10AA	+	A	G	0.0146778	154	5.05647	6.9715e-25
3_214131	AT3G01540	AT3G01540.2,AT3G01540.1	RH14	-	T	C	0.0451237	93	15.2617	7.32284e-25
5_2828536	AT5G08690	AT5G08690.1	AT5G08690	+	A	G	0.0325019	86	16.9855	7.82158e-25
3_19398147	AT3G52300	AT3G52300.1,AT3G52300.2	ATPQ	+	A	G	0.00967248	101	15.1457	7.87491e-25
4_15346359	AT4G31700	AT4G31700.1,AT4G31700.2	RPS6A	-	T	C	0.00707547	81	15.5614	8.23297e-25
4_16558645	AT4G34700	AT4G34700.1	CIB22	+	A	G	0.0113016	87	14.71	8.28517e-25
1_25417013	AT1G67785	AT1G67785.1	AT1G67785	-	T	C	0.0441894	154	5.10014	8.37652e-25
4_359434	AT4G00860	AT4G00860.1	ATOZI1	-	T	C	0.021142	117	6.68134	8.81337e-25
5_8429068	AT5G24610	AT5G24610.1	AT5G24610	+	A	G	0.0667075	109	16.5338	8.95691e-25
1_2829120	AT1G08830	AT1G08830.1,AT1G08830.2	CSD1	+	A	G	0.0261341	106	5.21064	9.66097e-25
3_20563063	AT3G55460	AT3G55460.1	SCL30	+	A	G	0.0338257	158	16.897	9.94815e-25
5_693288	AT5G02960	AT5G02960.1	RPS23B	-	T	C	0.00782905	85	6.5686	1.00001e-24
5_6268331	AT5G18800	AT5G18800.1,AT5G18800.2	AT5G18800	+	A	G	0.0316355	218	5.13824	1.01941e-24
1_21031855	AT1G56200	AT1G56200.1,AT1G56200.2	emb1303	+	A	G	0.0657895	100	15.9234	1.03082e-24
5_16832228	AT5G42110	AT5G42110.1	AT5G42110	-	T	C	0.0628601	120	6.60345	1.05114e-24
1_5592962	AT1G16350	AT1G16350.1	AT1G16350	+	A	G	0.205128	88	4.54613	1.08812e-24
2_15670415	AT2G37340	AT2G37340.1,AT2G37340.2,AT2G37340.3	RS2Z33	-	T	C	0.0442825	79	15.9485	1.11541e-24
3_19032832	AT3G51260	AT3G51260.1,AT3G51260.2	PAD1	+	A	G	0.0339306	89	14.9221	1.11883e-24
5_25565694	AT5G63890	AT5G63890.2,AT5G63890.1	HISN8	-	T	C	0.0705996	73	16.1426	1.13828e-24
5_4044946	AT5G12470	AT5G12470.1	AT5G12470	-	T	C	0.059116	107	6.70054	1.18394e-24
1_18100366	AT1G48920	AT1G48920.1	NUCL1	+	A	G	0.0168132	130	3.62413	1.19013e-24
2_19344868	AT2G47110	AT2G47110.1,AT2G47110.2	RPS27AB	+	A	G	0.00554593	112	4.20318	1.19273e-24
1_24249205	AT1G65290	AT1G65290.1	MTACP2	-	T	C	0.00797141	116	4.44544	1.21355e-24
3_1167975	AT3G04400	AT3G04400.1,AT3G04400.2	RPL23C	+	A	G	0.00734932	179	3.82298	1.27613e-24
2_18249256	AT2G44120	AT2G44120.2,AT2G44120.1	RPL7C	-	T	C	0.0112104	74	15.4323	1.33681e-24
1_19153678	AT1G51650	AT1G51650.1	AT1G51650	+	A	G	0.0110824	180	5.70234	1.34223e-24
5_18397823	AT5G45390	AT5G45390.1	CLPP4	+	A	G	0.051573	100	6.68711	1.34906e-24
2_14019060	AT2G33040	AT2G33040.1	ATPC	-	T	C	0.0170248	225	5.11131	1.35301e-24
4_18114941	AT4G38800	AT4G38800.1	MTN1	-	T	C	0.00931995	91	15.891	1.37021e-24
5_13109825	AT5G34850	AT5G34850.1	PAP26	-	T	C	0.0221217	176	6.65143	1.37953e-24
3_5908295	AT3G17300	AT3G17300.1,AT3G17300.2	AT3G17300	+	A	G	0.031537	103	5.60995	1.4023e-24
5_9258072	AT5G26360	AT5G26360.1	CCT3	-	T	C	0.0303472	104	14.5445	1.41719e-24
3_19506682	AT3G52590	AT3G52590.1	RPL40B	+	A	G	0.0101191	130	16.7091	1.45613e-24
5_16709081	AT5G41760	AT5G41760.1,AT5G41760.2	AT5G41760	+	A	G	0.244635	114	3.68946	1.45876e-24
2_9071063	AT2G21170	AT2G21170.1,AT2G21170.2	TIM	-	T	C	0.0161901	77	15.9384	1.56304e-24
5_9836310	AT5G27770	AT5G27770.1	RPL22C	+	A	G	0.0162246	271	4.26306	1.58412e-24
2_133513	AT2G01250	AT2G01250.1,AT2G01250.2	RPL7B	-	T	C	0.00681143	117	4.73548	1.64886e-24
4_1074033	AT4G02450	AT4G02450.1,AT4G02450.2	AT4G02450	-	T	C	0.00827275	99	5.56222	1.86797e-24
5_16610057	AT5G41520	AT5G41520.1,AT5G41520.2	RPS10B	-	T	C	0.013332	138	3.73708	1.97499e-24
3_19505699	AT3G52590	AT3G52590.1	RPL40B	+	A	G	0.0107342	125	5.06862	2.03737e-24
5_10069937	AT5G28060	AT5G28060.1	RPS24B	-	T	C	0.0116971	171	4.56743	2.11599e-24
5_18382119	AT5G45350	AT5G45350.1,AT5G45350.3	AT5G45350	-	T	C	0.0590231	87	16.8019	2.13256e-24
3_1009135	AT3G03920	AT3G03920.1	AT3G03920	-	T	C	0.0267803	88	6.53942	2.14898e-24
1_1056269	AT1G04080	AT1G04080.1,AT1G04080.5,AT1G04080.3,AT1G04080.2	PRP39	+	A	G	0.103604	92	15.217	2.16002e-24
1_29746782	AT1G79075	AT1G79075.1,AT1G79075.2	AT1G79075	+	A	G	0.0528938	138	15.4363	2.17293e-24
4_16700882	AT4G35090	AT4G35090.1,AT4G35090.3,AT4G35090.2	CAT2	-	T	C	0.0264185	88	17.0359	2.19163e-24
4_8302072	AT4G14420	AT4G14420.1	AT4G14420	-	T	C	0.043179	69	15.4342	2.19723e-24
1_3154745	AT1G09740	AT1G09740.1,AT1G09740.2	AT1G09740	+	A	G	0.0189405	256	5.01575	2.21967e-24
2_10763121	AT2G25280	AT2G25280.1	AT2G25280	-	T	C	0.045045	75	15.4198	2.31513e-24
3_3735201	AT3G11830	AT3G11830.1,AT3G11830.2	CCT7	+	A	G	0.0241268	105	5.61998	2.31535e-24
5_4530975	AT5G14040	AT5G14040.1	MPT3	-	T	C	0.0166124	102	15.9462	2.4072e-24
1_9493881	AT1G27330	AT1G27330.1	AT1G27330	+	A	G	0.0134066	83	17.4335	2.44463e-24
3_8475521	AT3G23600	AT3G23600.1,AT3G23600.2	AT3G23600	+	A	G	0.0259352	364	3.61856	2.47535e-24
4_17926321	AT4G38220	AT4G38220.1,AT4G38220.2	AT4G38220	+	A	G	0.0296323	83	6.57377	2.49033e-24
5_1028651	AT5G03850	AT5G03850.1	RPS28A	-	T	C	0.00652655	118	4.68794	2.52317e-24
2_8788262	AT2G20360	AT2G20360.1	AT2G20360	+	A	G	0.023069	135	5.59324	2.55228e-24
1_20136793	AT1G53910	AT1G53910.1,AT1G53910.3	RAP2-12	+	A	G	0.0538071	106	3.97137	2.58045e-24
2_18249309	AT2G44120	AT2G44120.2,AT2G44120.1	RPL7C	-	T	C	0.0114895	83	15.4459	2.72885e-24
3_17649814	AT3G47833	AT3G47833.1	SDH7A	+	A	G	0.0282784	91	6.58612	2.77588e-24
4_11486238	AT4G21600	AT4G21600.1	ENDO5	+	A	G	0.0284869	77	14.724	2.79682e-24
2_9072487	AT2G21170	AT2G21170.1,AT2G21170.3	TIM	-	T	C	0.0204876	121	4.677	2.83367e-24
2_9104043	AT2G21250	AT2G21250.1,AT2G21250.2	AT2G21250	-	T	C	0.0530019	113	4.46996	2.87476e-24
5_5246583	AT5G16060	AT5G16060.1	AT5G16060	+	A	G	0.038181	89	17.4566	2.90215e-24
4_15789658	AT4G32720	AT4G32720.1,AT4G32720.2	LA1	+	A	G	0.101737	82	15.2047	3.1399e-24
1_11410985	AT1G31812	AT1G31812.1	ACBP6	-	T	C	0.0512821	100	16.1843	3.28292e-24
4_14469533	AT4G29410	AT4G29410.1,AT4G29410.2	RPL28C	-	T	C	0.0118081	128	5.15262	3.39501e-24
5_6557490	AT5G19440	AT5G19440.1	AT5G19440	+	A	G	0.0236364	130	15.7547	3.45259e-24
2_11049750	AT2G25910	AT2G25910.1,AT2G25910.2	AT2G25910	-	T	C	0.0224602	86	16.8123	3.49272e-24
1_25263005	AT1G67430	AT1G67430.1,AT1G67430.2	RPL17B	+	A	G	0.00751029	146	5.66514	3.50418e-24
3_23037592	AT3G62250	AT3G62250.1	RPS27AC	+	A	G	0.00926634	109	4.48936	3.6854e-24
4_18114973	AT4G38800	AT4G38800.1	MTN1	-	T	C	0.0227964	195	4.73118	3.71955e-24
1_16647990	AT1G43890	AT1G43890.1,AT1G43890.2,AT1G43890.3	RABC1	+	A	G	0.0231162	104	4.42455	3.7538e-24
3_23037564	AT3G62250	AT3G62250.1	RPS27AC	+	A	G	0.00801382	116	4.79676	3.78323e-24
3_3623686	AT3G11510	AT3G11510.1	RPS14B	-	T	C	0.0179963	127	6.68384	3.82912e-24
3_1168352	AT3G04400	AT3G04400.1,AT3G04400.2	RPL23C	+	A	G	0.0104567	128	6.65521	3.891e-24
2_19552013	AT2G47690	AT2G47690.1,AT2G47690.2,AT2G47690.3	AT2G47690	+	A	G	0.0155487	172	6.22474	3.96001e-24
3_10077711	AT3G27280	AT3G27280.1,AT3G27280.2	PHB4	+	A	G	0.0370818	92	6.50074	3.97868e-24
5_25750102	AT5G64400	AT5G64400.1,AT5G64400.2,AT5G64400.3	AT5G64400	+	A	G	0.00944048	123	5.11238	3.99766e-24
4_15308257	AT4G31580	AT4G31580.1,AT4G31580.2	RSZ22	+	A	G	0.11756	79	15.3909	4.16784e-24
1_12012217	AT1G33120	AT1G33120.1	RPL9B	+	A	G	0.00879851	90	5.62314	4.35012e-24
4_16541728	AT4G34640	AT4G34640.1,AT4G34640.2	SQS1	+	A	G	0.0843023	87	16.4584	4.66555e-24
1_2685313	AT1G08480	AT1G08480.1	SDH6	+	A	G	0.0195561	89	5.63567	4.68316e-24
4_9028587	AT4G15910	AT4G15910.1	ATDI21	+	A	G	0.0190055	219	3.34583	4.69949e-24
5_19790164	AT5G48810	AT5G48810.1	CYTB5-D	-	T	C	0.0143228	127	5.05474	4.87998e-24
5_17557365	AT5G43720	AT5G43720.1	AT5G43720	-	T	C	0.151292	82	15.9085	4.99802e-24
2_19646995	AT2G48020	AT2G48020.1,AT2G48020.4,AT2G48020.3	AT2G48020	+	A	G	0.103281	85	15.243	5.48561e-24
2_12852642	AT2G30110	AT2G30110.1	UBA1	-	T	C	0.0323964	68	17.0447	5.58666e-24
1_17298577	AT1G47200	AT1G47200.1	WPP2	-	T	C	0.026284	174	6.64026	5.66547e-24
1_29796729	AT1G79210	AT1G79210.1,AT1G79210.2,AT1G79210.3	PAB2	-	T	C	0.0252936	84	15.8997	5.95771e-24
1_1142614	AT1G04270	AT1G04270.1,AT1G04270.2	RPS15A	-	T	C	0.00586387	168	5.02854	6.03481e-24
2_18205838	AT2G43970	AT2G43970.1,AT2G43970.2	LARP6B	-	T	C	0.015989	105	5.59273	6.49594e-24
4_904212	AT4G02060	AT4G02060.1,AT4G02060.2	MCM7	+	A	G	0.129888	93	15.373	6.67337e-24
4_9280456	AT4G16450	AT4G16450.1,AT4G16450.2	AT4G16450	+	A	G	0.00869565	89	5.09469	6.84304e-24
2_19368381	AT2G47170	AT2G47170.1,AT2G47170.2,AT2G47170.3	ARF1	+	A	G	0.00888018	77	16.4977	6.87027e-24
1_3136353	AT1G09690	AT1G09690.1	RPL21A	-	T	C	0.0175756	107	17.913	6.93579e-24
3_9423215	AT3G25800	AT3G25800.1,AT3G25800.2	PP2AA2	-	T	C	0.047409	86	5.61613	6.99122e-24
5_13710330	AT5G35530	AT5G35530.1	RPS3C	-	T	C	0.017619	74	16.4672	7.13172e-24
4_14938637	AT4G30600	AT4G30600.1,AT4G30600.2	AT4G30600	-	T	C	0.0599755	98	6.65748	7.46569e-24
1_24440565	AT1G65720	AT1G65720.1	AT1G65720	-	T	C	0.0424528	126	5.15712	7.66304e-24
1_27850105	AT1G74060	AT1G74060.1	RPL6B	-	T	C	0.0107823	86	16.681	7.66304e-24
2_15671054	AT2G37340	AT2G37340.1,AT2G37340.2,AT2G37340.3	RS2Z33	-	T	C	0.0692946	167	16.4625	7.7648e-24
3_2823683	AT3G09200	AT3G09200.1,AT3G09200.2	RPP0B	-	T	C	0.0104425	181	5.79219	7.79357e-24
4_16336786	AT4G34110	AT4G34110.1	PAB2	+	A	G	0.0132428	117	6.48203	8.22315e-24
1_9513358	AT1G27390	AT1G27390.1,AT1G27390.2	TOM20-2	-	T	C	0.0580256	77	15.7627	8.32162e-24
5_16832222	AT5G42110	AT5G42110.1	AT5G42110	-	T	C	0.0507357	100	5.52477	8.4862e-24
3_87605	AT3G01280	AT3G01280.1	VDAC1	+	A	G	0.00946897	74	15.1529	8.72043e-24
5_6558070	AT5G19440	AT5G19440.1	AT5G19440	+	A	G	0.02225	89	5.08647	9.41349e-24
1_26621459	AT1G70600	AT1G70600.1	RPL27AC	-	T	C	0.00862299	259	3.57515	9.50605e-24
1_19103379	AT1G51510	AT1G51510.1	Y14	-	T	C	0.0335766	92	17.0019	9.54417e-24
5_13108430	AT5G34850	AT5G34850.1	PAP26	-	T	C	0.0279178	144	16.7185	9.60234e-24
5_21760277	AT5G53560	AT5G53560.1	CYTB5-E	+	A	G	0.0119904	140	5.13678	9.70742e-24
5_23515870	AT5G58110	AT5G58110.1	AT5G58110	+	A	G	0.0335293	154	4.71855	9.72403e-24
4_18057508	AT4G38630	AT4G38630.1	RPN10	-	T	C	0.0151041	82	6.54278	9.80244e-24
5_2818277	AT5G08670	AT5G08670.1	AT5G08670	-	T	C	0.0204371	72	16.7109	9.90037e-24
5_3923821	AT5G12140	AT5G12140.1	CYS1	-	T	C	0.00749928	130	4.14387	9.92381e-24
5_403340	AT5G02050	AT5G02050.1	AT5G02050	-	T	C	0.0244888	97	5.61017	1.00055e-23
3_18334857	AT3G49430	AT3G49430.1,AT3G49430.2	SR34A	+	A	G	0.0824176	75	14.8767	1.0016e-23
4_16067956	AT4G33360	AT4G33360.1,AT4G33360.2	FLDH	-	T	C	0.0401133	85	5.11708	1.00259e-23
2_11763991	AT2G27530	AT2G27530.1,AT2G27530.2	RPL10AB	-	T	C	0.00951972	155	5.65501	1.04204e-23
5_24290723	AT5G60390	AT5G60390.1,AT5G60390.2,AT5G60390.3	A3	+	A	G	0.00461667	94	5.54085	1.05808e-23
2_7548173	AT2G17360	AT2G17360.1,AT2G17360.2	RPS4A	+	A	G	0.0131415	74	15.6154	1.06548e-23
1_27109454	AT1G72020	AT1G72020.1	AT1G72020	-	T	C	0.00945115	83	6.51849	1.06689e-23
1_9527940	AT1G27435	AT1G27435.1	AT1G27435	-	T	C	0.0209021	76	15.7154	1.29586e-23
4_16339274	AT4G34110	AT4G34110.1	PAB2	+	A	G	0.0101566	107	6.63544	1.34511e-23
1_9207019	AT1G26630	AT1G26630.1,AT1G26630.2	ELF5A-2	+	A	G	0.00718923	165	4.65202	1.36559e-23
3_1331063	AT3G04840	AT3G04840.1	RPS3AA	+	A	G	0.00711673	107	4.22371	1.42109e-23
5_209503	AT5G01530	AT5G01530.1	LHCB4.1	+	A	G	0.0510585	82	6.54641	1.45897e-23
1_9562839	AT1G27530	AT1G27530.1	AT1G27530	-	T	C	0.0359783	146	16.4465	1.47538e-23
4_16337904	AT4G34110	AT4G34110.1	PAB2	+	A	G	0.0162268	91	6.46904	1.50822e-23
1_23669665	AT1G63810	AT1G63810.1,AT1G63810.2	AT1G63810	-	T	C	0.447368	85	4.6421	1.51461e-23
4_16476675	AT4G34450	AT4G34450.1	AT4G34450	+	A	G	0.0190254	98	5.09438	1.54703e-23
5_19406430	AT5G47930	AT5G47930.1	RPS27D	-	T	C	0.015228	166	4.50724	1.71231e-23
1_22053667	AT1G59900	AT1G59900.1	E1 ALPHA	+	A	G	0.0313509	68	14.9539	1.72235e-23
3_3522838	AT3G11250	AT3G11250.1	RPP0C	+	A	G	0.0735444	72	14.7431	1.73239e-23
1_20576771	AT1G55150	AT1G55150.1,AT1G55150.2	RH20	+	A	G	0.25641	130	4.28217	1.75815e-23
2_19555019	AT2G47710	AT2G47710.1	AT2G47710	-	T	C	0.0588235	100	15.7701	1.76873e-23
5_26437466	AT5G66140	AT5G66140.1	PAD2	-	T	C	0.054535	95	16.2323	1.87031e-23
4_12709050	AT4G24620	AT4G24620.1,AT4G24620.2	PGI1	-	T	C	0.0241249	102	15.8554	1.90164e-23
1_23743108	AT1G63980	AT1G63980.1,AT1G63980.2	AT1G63980	+	A	G	0.173448	81	16.0045	1.94934e-23
1_5295576	AT1G15390	AT1G15390.1	PDF1A	+	A	G	0.169336	74	16.0463	1.96318e-23
5_1879279	AT5G06210	AT5G06210.1	AT5G06210	+	A	G	0.0650936	80	6.51387	1.99895e-23
1_24686439	AT1G66240	AT1G66240.2,AT1G66240.1,AT1G66240.3	ATX1	-	T	C	0.00827598	95	16.7067	2.07429e-23
5_23874732	AT5G59140	AT5G59140.1	AT5G59140	-	T	C	0.0606327	138	3.23024	2.07429e-23
4_18148858	AT4G38920	AT4G38920.1,AT4G38920.2	VHA-C3	+	A	G	0.0103431	101	5.07361	2.07591e-23
4_16403515	AT4G34265	AT4G34265.2,AT4G34265.1,AT4G34265.3	AT4G34265	+	A	G	0.0531136	87	6.58458	2.08362e-23
1_29346524	AT1G78040	AT1G78040.1,AT1G78040.2,AT1G78040.3	AT1G78040	+	A	G	0.0115888	324	1.74365	2.08761e-23
3_23433641	AT3G63460	AT3G63460.1,AT3G63460.2,AT3G63460.3	SEC31B	-	T	C	0.041107	101	14.9569	2.10047e-23
3_20846106	AT3G56190	AT3G56190.1,AT3G56190.2	ASNAP2	-	T	C	0.0441733	105	15.3613	2.27495e-23
5_17460992	AT5G43460	AT5G43460.1,AT5G43460.2	AT5G43460	+	A	G	0.0194101	77	16.1773	2.27564e-23
2_14144119	AT2G33370	AT2G33370.1,AT2G33370.2	RPL23C	-	T	C	0.0111722	124	6.60397	2.38878e-23
1_28135694	AT1G74910	AT1G74910.1,AT1G74910.3	AT1G74910	-	T	C	0.0683845	69	16.1088	2.48908e-23
2_15170925	AT2G36160	AT2G36160.1	RPS14A	+	A	G	0.00617006	96	5.01105	2.65241e-23
3_19990715	AT3G53990	AT3G53990.1,AT3G53990.2	AT3G53990	-	T	C	0.0292725	235	4.48292	2.65999e-23
3_19955597	AT3G53890	AT3G53890.1,AT3G53890.2	RPS21B	-	T	C	0.00869103	98	6.56559	2.67005e-23
1_2460061	AT1G07930	AT1G07930.1	A3	+	A	G	0.00901968	99	6.4683	2.67454e-23
[truncated: 12,390 more rows]

## Sheet: GENES_ECT3-HT_roots
GENE	NAME	STRAND	TRANSCRIPTS	TPM	HITS	IDs	PROP	log2FC	p-adj	MISMATCH TYPE
AT2G36620	RPL24A	-	AT2G36620.1	392.8179134	6	2_15350547,2_15350509,2_15350872,2_15351270,2_15350815,2_15351055	0.533,0.0356,0.00593,0.0165,0.00191,0.00317	6.11,7.04,3.45,2.13,4.62,2.45	0,5.35e-30,2.08e-12,8.11e-12,8.25e-06,0.00014	T:C,T:C,T:C,T:C,T:C,T:C
AT3G52590	RPL40B	+	AT3G52590.1	1560.2207072	33	3_19506684,3_19506699,3_19506553,3_19506102,3_19506577,3_19506517,3_19506059,3_19506089,3_19505766,3_19506682,3_19505699,3_19505720,3_19505666,3_19506116,3_19506064,3_19506101,3_19505939,3_19506677,3_19506117,3_19506035,3_19505698,3_19505943,3_19506111,3_19506549,3_19505764,3_19505942,3_19505672,3_19506061,3_19505907,3_19505665,3_19506042,3_19506570,3_19506671	0.319,0.117,0.0308,0.024,0.02,0.0132,0.0127,0.00815,0.00596,0.0101,0.0107,0.00561,0.0223,0.00475,0.00179,0.00388,0.00257,0.00413,0.00286,0.000973,0.00368,0.000772,0.00124,0.0019,0.000631,0.00154,0.00271,0.000525,0.000793,0.00348,0.000427,0.00109,0.00121	7.22,7.86,7.72,4.69,6.4,8.36,5.52,5.04,6.76,16.7,5.07,5.44,4.78,4.48,5.77,4.03,3.2,4.47,4.02,15.1,5.01,4.35,2.68,2.6,14.4,1.9,3.26,4.01,2.48,12.9,3.62,3.13,2.12	0,1.31e-149,1.31e-95,2.51e-92,2.65e-81,2.68e-80,1.09e-46,9.43e-44,5.99e-28,1.46e-24,2.04e-24,4.65e-22,4.3e-21,1.23e-15,3.35e-14,7.5e-12,7.39e-11,4.46e-10,4.77e-09,6.71e-08,1.41e-07,6.5e-05,7.07e-05,0.000102,0.000357,0.000437,0.000735,0.000904,0.00172,0.0018,0.00533,0.00676,0.00934	A:G,A:G,A:G,A:G,A:G,A:G,A:G,A:G,A:G,A:G,A:G,A:G,A:G,A:G,A:G,A:G,A:G,A:G,A:G,A:G,A:G,A:G,A:G,A:G,A:G,A:G,A:G,A:G,A:G,A:G,A:G,A:G,A:G
AT5G03850	RPS28A	-	AT5G03850.1	2607.039987	16	5_1028504,5_1028505,5_1028506,5_1028651,5_1028597,5_1028596,5_1028556,5_1028672,5_1028721,5_1028507,5_1028509,5_1028702,5_1028523,5_1028465,5_1028512,5_1028520	0.308,0.0171,0.0249,0.00653,0.0073,0.0048,0.00396,0.00357,0.00351,0.00158,0.00149,0.00194,0.00127,0.00153,0.00108,0.0017	6.1,17.8,7.25,4.69,4.45,4.85,4.01,3.03,3.32,13.8,12.4,3.52,14,14.3,3.66,3.86	0,1.07e-35,4.77e-34,2.52e-24,1.62e-13,3.77e-13,3.43e-10,6.17e-07,7.06e-06,2.65e-05,5.1e-05,8.3e-05,9.28e-05,0.00073,0.00545,0.00983	T:C,T:C,T:C,T:C,T:C,T:C,T:C,T:C,T:C,T:C,T:C,T:C,T:C,T:C,T:C,T:C
AT2G17360	RPS4A	+	AT2G17360.1,AT2G17360.2	257.2500356,0.0867916	39	2_7548140,2_7547873,2_7547281,2_7547869,2_7547872,2_7548085,2_7548094,2_7547816,2_7548013,2_7547962,2_7548144,2_7547821,2_7548173,2_7547834,2_7547273,2_7547917,2_7547822,2_7547505,2_7548076,2_7548086,2_7547274,2_7547275,2_7548049,2_7548010,2_7547935,2_7547994,2_7548194,2_7547992,2_7547298,2_7547999,2_7547496,2_7547199,2_7547224,2_7547939,2_7548109,2_7548115,2_7548145,2_7547941,2_7548164	0.392,0.193,0.133,0.0665,0.0378,0.0291,0.0297,0.0255,0.025,0.0165,0.0232,0.00888,0.0131,0.0152,0.00568,0.00824,0.013,0.0133,0.0058,0.00881,0.00425,0.00475,0.00346,0.00361,0.00296,0.00277,0.00516,0.00254,0.0026,0.00222,0.00297,0.00118,0.00162,0.00264,0.00148,0.00188,0.0016,0.00172,0.0017	6.6,4.54,3.26,4.73,19,7.97,7.62,6.53,4.81,7.1,7.03,6.59,15.6,5.02,14.6,4.4,6.26,3.94,4.91,3.42,15.7,3.52,15,3.38,4.97,4.03,3.87,3.83,3.69,3.69,2.67,13.8,2.69,4.43,13.9,4.1,14.5,2.82,3.68	1.54999999999836e-312,1.2e-191,4.33e-122,6.71e-78,1.58e-63,3.56e-57,8.4e-47,1.51e-43,5.53e-38,4.24e-32,1.88e-29,2.19e-25,1.07e-23,8.02e-23,1.81e-20,1.05e-18,1.62e-17,1.05e-14,4.46e-14,4.28e-11,6.45e-11,7.07e-10,1.44e-09,1.04e-07,1.87e-07,4.81e-07,4.31e-06,4.52e-06,1.88e-05,2.39e-05,6.29e-05,0.000186,0.000221,0.000328,0.000599,0.000631,0.00257,0.00625,0.00666	A:G,A:G,A:G,A:G,A:G,A:G,A:G,A:G,A:G,A:G,A:G,A:G,A:G,A:G,A:G,A:G,A:G,A:G,A:G,A:G,A:G,A:G,A:G,A:G,A:G,A:G,A:G,A:G,A:G,A:G,A:G,A:G,A:G,A:G,A:G,A:G,A:G,A:G,A:G
AT4G14320	RPL36AB	-	AT4G14320.1	1016.66983	2	4_8242712,4_8242710	0.209,0.00151	8.09,3.73	2.44e-293,0.0091	T:C,T:C
AT4G16450	AT4G16450	+	AT4G16450.1,AT4G16450.2	754.0421166,NA	9	4_9280509,4_9280456,4_9280198,4_9280277,4_9280404,4_9280592,4_9280160,4_9280459,4_9280542	0.247,0.0087,0.0109,0.00551,0.00694,0.0035,0.00241,0.00137,0.00186	5.92,5.09,4.3,6.05,3.9,14.1,13.6,4.03,3.79	5.19e-268,6.84e-24,3.83e-21,1.57e-16,5.51e-12,3.59e-05,8.26e-05,0.00115,0.00444	A:G,A:G,A:G,A:G,A:G,A:G,A:G,A:G,A:G
AT1G09590	RPL21A	+	AT1G09590.1	676.6493656	11	1_3107611,1_3107605,1_3107503,1_3107541,1_3107626,1_3107497,1_3107437,1_3107730,1_3107553,1_3107689,1_3107551	0.27,0.0329,0.0214,0.00652,0.0036,0.00239,0.00183,0.0174,0.00116,0.00476,0.00105	8.85,6.03,4.98,16.4,15.2,5.04,3.19,14.7,13.5,12.1,3.57	2.14e-259,3.79e-46,1.11e-35,6.08e-18,5.21e-08,5.31e-08,4.61e-05,9.63e-05,0.00087,0.00094,0.00678	A:G,A:G,A:G,A:G,A:G,A:G,A:G,A:G,A:G,A:G,A:G
AT5G63400	ADK1	-	AT5G63400.1,AT5G63400.2	229.608818,0.0117992	27	5_25393550,5_25394174,5_25393256,5_25394785,5_25394729,5_25394241,5_25393797,5_25393270,5_25393209,5_25393731,5_25393238,5_25393785,5_25394193,5_25393213,5_25394148,5_25393924,5_25393320,5_25393796,5_25393291,5_25394244,5_25394150,5_25394739,5_25393764,5_25393259,5_25393260,5_25393649,5_25394259	0.252,0.0574,0.0733,0.0507,0.018,0.0196,0.016,0.0234,0.014,0.00673,0.00879,0.0068,0.00279,0.00505,0.00304,0.00364,0.00264,0.00268,0.00476,0.00209,0.00186,0.00152,0.00211,0.00304,0.00179,0.00106,0.00109	3.62,6.03,8.41,6.11,6.94,4.09,6.86,4.89,5.13,5.95,16.3,14.6,14.6,14.2,4.86,4.71,13.2,14.7,4.82,3.22,14.6,13.1,3.2,3.97,12.7,3.65,2.81	3.55e-259,2.44e-96,3.13e-73,1.91e-33,1.39e-31,3.11e-31,1.03e-30,7.38e-27,2.32e-16,3.66e-16,1.01e-15,8.59e-11,1.03e-08,1.31e-07,3.45e-07,2.56e-06,6.8e-06,7.73e-06,1.64e-05,3.87e-05,0.00115,0.00119,0.00157,0.00193,0.00223,0.00625,0.00819	T:C,T:C,T:C,T:C,T:C,T:C,T:C,T:C,T:C,T:C,T:C,T:C,T:C,T:C,T:C,T:C,T:C,T:C,T:C,T:C,T:C,T:C,T:C,T:C,T:C,T:C,T:C
AT1G79010	AT1G79010	-	AT1G79010.1	169.6246596	10	1_29725126,1_29725124,1_29725231,1_29725508,1_29726037,1_29725422,1_29725211,1_29726069,1_29726408,1_29725349	0.513,0.0845,0.00963,0.0111,0.00414,0.00501,0.00287,0.00194,0.00121,0.00161	4.54,8.44,5.98,5.75,13.3,5.05,4.37,12.2,13.5,3.72	3.26e-251,1.55e-76,1.16e-15,6.27e-11,4.68e-09,1.54e-07,0.000102,0.000136,0.00327,0.00569	T:C,T:C,T:C,T:C,T:C,T:C,T:C,T:C,T:C,T:C
AT3G59540	RPL38B	-	AT3G59540.1	1921.2349032	18	3_21995863,3_21995848,3_21995906,3_21996283,3_21996358,3_21996350,3_21996225,3_21995896,3_21996752,3_21996362,3_21996247,3_21996256,3_21996261,3_21995907,3_21996340,3_21995889,3_21996313,3_21996248	0.379,0.287,0.114,0.0168,0.0264,0.0103,0.0148,0.0109,0.0167,0.00262,0.003,0.00387,0.00162,0.00327,0.00213,0.00188,0.000799,0.000729	7.15,8.55,7.21,5.39,18.3,5.64,5.72,4.27,3.6,14.5,14.2,4.25,14.3,3.36,3.54,3.6,3.96,13.3	5.01e-239,1.01e-230,1.23e-118,1.18e-55,3.27e-54,6.03e-40,7.12e-39,2.25e-15,1.16e-11,3.57e-10,5.76e-10,9.54e-09,2.77e-07,7.83e-07,1.3e-05,3.12e-05,0.00235,0.0051	T:C,T:C,T:C,T:C,T:C,T:C,T:C,T:C,T:C,T:C,T:C,T:C,T:C,T:C,T:C,T:C,T:C,T:C
AT1G79075	AT1G79075	+	AT1G79075.1,AT1G79075.2	NA	12	1_29746683,1_29746676,1_29746692,1_29746782,1_29746682,1_29746828,1_29746003,1_29746661,1_29746685,1_29746826,1_29746776,1_29746667	0.521,0.271,0.0428,0.0529,0.0162,0.0339,0.0873,0.0168,0.0082,0.0144,0.00724,0.00475	10.6,18.1,16.6,15.4,15.8,14.9,14.8,13.7,14.2,4.53,3.24,14	4.37e-232,3.43e-117,9.15e-28,2.17e-24,7.37e-14,6.81e-13,3.01e-11,5.56e-09,2.55e-06,1.07e-05,0.000292,0.00118	A:G,A:G,A:G,A:G,A:G,A:G,A:G,A:G,A:G,A:G,A:G,A:G
AT4G34110	PAB2	+	AT4G34110.1	154.967149	66	4_16339804,4_16339569,4_16339708,4_16338898,4_16339189,4_16336921,4_16338016,4_16337870,4_16339582,4_16337959,4_16337597,4_16337578,4_16336936,4_16339245,4_16338156,4_16337760,4_16337663,4_16336786,4_16339274,4_16337904,4_16339580,4_16337237,4_16337869,4_16338526,4_16338513,4_16338119,4_16339264,4_16338438,4_16337238,4_16336967,4_16339793,4_16339563,4_16338813,4_16337313,4_16336757,4_16339693,4_1…	0.284,0.298,0.0711,0.045,0.0342,0.0412,0.0298,0.0328,0.0182,0.0397,0.0942,0.0273,0.0164,0.0104,0.00933,0.0235,0.0217,0.0132,0.0102,0.0162,0.00937,0.0124,0.015,0.0105,0.0098,0.00598,0.00424,0.00423,0.00656,0.00521,0.00423,0.00291,0.0047,0.00563,0.00506,0.00244,0.0021,0.00469,0.00444,0.0019,0.00198,0.00438,0.00361,0.00294,0.0023,0.00255,0.00342,0.00201,0.00263,0.00278,0.00248,0.00168,0.00124,0.0027…	5.12,2.43,6.39,5.2,5.01,5.16,7.6,6.59,5.82,3.24,2.42,15.9,5.27,17,5.68,5.73,3.57,6.48,6.64,6.47,3.95,3.95,4.83,6.42,15.5,15.2,4.57,15.3,5.25,3.44,14,15.3,4.29,4.09,3.95,4.91,13.8,2.97,2.79,3.66,14.5,4.57,13.4,13.3,14.4,2.89,13.5,4.28,15,12.9,13.3,13,13.6,13.5,3.97,3.33,4.02,2.95,13.6,3.23,3.88,3.69,3.75,2.99,12,12.5	8.21e-231,1.51e-107,1.36e-98,2.2e-96,9.19e-66,5.79e-63,2.68e-52,4.09e-51,5.49e-39,3.8e-38,8.83e-35,2.92e-30,4.63e-30,9.02e-27,2.2e-26,5.27e-26,4.59e-25,8.22e-24,1.35e-23,1.51e-23,1.12e-21,2.39e-21,8.91e-21,4.25e-20,1.03e-17,1.81e-12,6.78e-11,1.56e-10,1.94e-09,4.76e-09,7.4e-09,8.04e-09,9.76e-09,8.02e-08,3.24e-07,4.91e-07,1.23e-06,1.27e-05,1.79e-05,2e-05,2.67e-05,2.72e-05,3.07e-05,6.66e-05,6.74e-05…	A:G,A:G,A:G,A:G,A:G,A:G,A:G,A:G,A:G,A:G,A:G,A:G,A:G,A:G,A:G,A:G,A:G,A:G,A:G,A:G,A:G,A:G,A:G,A:G,A:G,A:G,A:G,A:G,A:G,A:G,A:G,A:G,A:G,A:G,A:G,A:G,A:G,A:G,A:G,A:G,A:G,A:G,A:G,A:G,A:G,A:G,A:G,A:G,A:G,A:G,A:G,A:G,A:G,A:G,A:G,A:G,A:G,A:G,A:G,A:G,A:G,A:G,A:G,A:G,A:G,A:G
AT1G76010	AT1G76010	-	AT1G76010.1,AT1G76010.2	133.4057532,NA	27	1_28528362,1_28528477,1_28528471,1_28530736,1_28528465,1_28530661,1_28528464,1_28530022,1_28528594,1_28528474,1_28529817,1_28530638,1_28528466,1_28528150,1_28530478,1_28528818,1_28528409,1_28528728,1_28528579,1_28528478,1_28529279,1_28528468,1_28530011,1_28530728,1_28528476,1_28528475,1_28528758	0.305,0.086,0.0487,0.108,0.0273,0.0208,0.0363,0.0122,0.0106,0.0206,0.03,0.00809,0.0106,0.107,0.0043,0.00859,0.00647,0.00433,0.0157,0.00375,0.00868,0.00307,0.00208,0.00598,0.00208,0.00231,0.0025	5.21,7.62,8.27,17.1,16.1,5.69,4.17,4.68,4.32,4.29,4.2,16.1,5.76,13.9,13.2,2.97,14,5.07,4.28,13.9,13.9,4.12,13.2,12.8,13,3.8,2.1	8.6e-228,6.79e-85,1.87e-74,2.42e-35,3.07e-33,1.51e-26,2.15e-26,2.97e-18,1.96e-17,3.93e-16,5.29e-16,5.32e-13,7.52e-13,4.2e-11,4.02e-09,6.55e-09,3.24e-08,6.41e-08,1.47e-07,0.000235,0.000355,0.000628,0.000722,0.00115,0.00166,0.0045,0.00931	T:C,T:C,T:C,T:C,T:C,T:C,T:C,T:C,T:C,T:C,T:C,T:C,T:C,T:C,T:C,T:C,T:C,T:C,T:C,T:C,T:C,T:C,T:C,T:C,T:C,T:C,T:C
AT4G34700	CIB22	+	AT4G34700.1	1235.148896	37	4_16558578,4_16558613,4_16558627,4_16558584,4_16558591,4_16558626,4_16558612,4_16558580,4_16558370,4_16558573,4_16558619,4_16558645,4_16558546,4_16558192,4_16558379,4_16558574,4_16558395,4_16558394,4_16558560,4_16558605,4_16558671,4_16558579,4_16558590,4_16558325,4_16558549,4_16558377,4_16558673,4_16557144,4_16556983,4_16558385,4_16558340,4_16558337,4_16558350,4_16558625,4_16558336,4_16558575,4_1…	0.131,0.642,0.296,0.15,0.133,0.0542,0.0791,0.0277,0.0199,0.0254,0.0165,0.0113,0.00805,0.00264,0.0063,0.00318,0.00351,0.00282,0.00448,0.00341,0.00634,0.00245,0.00226,0.00157,0.00109,0.00159,0.00227,0.000871,0.000755,0.00121,0.000831,0.000783,0.00301,0.00134,0.000753,0.00114,0.00117	10.2,5.29,8.8,8.11,8.8,6.7,8.42,16.4,6.11,6.16,16.7,14.7,5,5.54,5.65,14.9,5.41,14.7,5.23,15,4.98,14.9,4.46,3.68,13.8,3.94,13,13,3.14,3.86,3.81,12.9,2.11,3.72,3.61,13.4,2.85	6.35e-222,8.4e-197,3.67e-189,1.38e-126,3.34e-116,1.48e-76,3.8e-74,6.46e-59,1.42e-34,2.22e-33,3.23e-32,8.29e-25,2.14e-14,2.41e-12,2.63e-11,8.33e-11,1.11e-10,2.15e-10,6.52e-09,9.92e-08,1.03e-07,1.28e-07,1.05e-05,3.4e-05,0.000384,0.000432,0.000569,0.00143,0.00214,0.00229,0.00247,0.00274,0.0039,0.00412,0.00449,0.00539,0.00602	A:G,A:G,A:G,A:G,A:G,A:G,A:G,A:G,A:G,A:G,A:G,A:G,A:G,A:G,A:G,A:G,A:G,A:G,A:G,A:G,A:G,A:G,A:G,A:G,A:G,A:G,A:G,A:G,A:G,A:G,A:G,A:G,A:G,A:G,A:G,A:G,A:G
AT1G49240	ACT8	+	AT1G49240.1	265.758926	15	1_18218095,1_18218086,1_18216685,1_18218126,1_18217633,1_18217625,1_18218085,1_18216787,1_18216762,1_18217061,1_18218192,1_18217911,1_18217235,1_18217621,1_18217619	0.205,0.0311,0.0215,0.0303,0.0432,0.00653,0.011,0.0106,0.00534,0.00679,0.00802,0.00158,0.00184,0.00124,0.00114	6.84,18.5,7.64,6.08,3.66,6.33,5.41,3.71,4.25,4.62,13,3.28,2.81,3.93,3.84	1.07e-219,9.9e-54,8.34e-49,3.94e-47,2.87e-36,6.71e-20,9.64e-19,3.88e-18,1.9e-12,4.73e-11,6.59e-05,0.000891,0.00188,0.002,0.00519	A:G,A:G,A:G,A:G,A:G,A:G,A:G,A:G,A:G,A:G,A:G,A:G,A:G,A:G,A:G
AT4G18100	RPL32A	-	AT4G18100.1	1203.8565142	20	4_10035807,4_10035806,4_10035741,4_10035908,4_10035727,4_10035750,4_10035881,4_10035581,4_10035692,4_10035591,4_10035732,4_10035518,4_10035848,4_10035769,4_10035608,4_10035803,4_10035909,4_10035818,4_10035929,4_10035973	0.154,0.0774,0.0404,0.0182,0.0108,0.00603,0.00302,0.0303,0.00619,0.0154,0.00353,0.432,0.00167,0.00136,0.0059,0.00143,0.00129,0.00053,0.000606,0.00121	5.13,7.53,6.04,6.67,16.1,4.94,16.7,15.3,5.91,14.3,5.55,3.18,3.61,14.1,14.4,3.81,4.62,14.2,3.05,1.78	6.47e-215,1.26e-168,1.63e-79,6.14e-47,5.88e-40,6.49e-22,7.08e-21,1.35e-19,4.68e-15,6.81e-13,1.57e-10,6.9e-09,2.17e-07,8.15e-07,5.53e-06,6.15e-06,2.4e-05,0.00163,0.0039,0.00584	T:C,T:C,T:C,T:C,T:C,T:C,T:C,T:C,T:C,T:C,T:C,T:C,T:C,T:C,T:C,T:C,T:C,T:C,T:C,T:C
AT1G14320	RPL10A	+	AT1G14320.1,AT1G14320.2	975.6585744,1.1148838	24	1_4889196,1_4889452,1_4888784,1_4889450,1_4889447,1_4888960,1_4889046,1_4889374,1_4889004,1_4888276,1_4889191,1_4889425,1_4889462,1_4888899,1_4888660,1_4889181,1_4888727,1_4888783,1_4888840,1_4888866,1_4888594,1_4889226,1_4889417,1_4888564	0.294,0.045,0.0875,0.0282,0.0101,0.0147,0.00663,0.00396,0.00391,0.00483,0.00218,0.00542,0.00302,0.0036,0.00187,0.0026,0.00134,0.00141,0.00115,0.00152,0.000512,0.000521,0.00118,0.000528	5.15,7.71,2.98,5.94,7.36,5.26,17.9,4.9,6.06,3.32,5.65,4.7,14.9,2.72,3.16,3.59,2.87,3.36,4.32,2.39,12.6,14.2,2.52,14.1	4.7e-214,4.13e-157,1.56e-156,7.09e-58,2.86e-43,4.96e-34,1.05e-21,1.77e-21,4.36e-16,1.1e-13,5.6e-13,1.05e-12,1.18e-11,4.12e-11,2.84e-09,3.74e-08,2.55e-06,2.72e-06,2.1e-05,0.000228,0.00023,0.000596,0.00194,0.00531	A:G,A:G,A:G,A:G,A:G,A:G,A:G,A:G,A:G,A:G,A:G,A:G,A:G,A:G,A:G,A:G,A:G,A:G,A:G,A:G,A:G,A:G,A:G,A:G
AT4G39200	RPS25E	+	AT4G39200.1,AT4G39200.2	1807.4907662,14.006688	34	4_18258389,4_18257855,4_18257627,4_18258457,4_18257852,4_18257867,4_18258390,4_18257624,4_18258369,4_18257849,4_18257834,4_18258398,4_18257843,4_18257861,4_18257578,4_18258385,4_18258365,4_18257870,4_18257570,4_18257848,4_18257854,4_18258456,4_18257573,4_18257636,4_18258463,4_18257889,4_18257842,4_18257424,4_18257930,4_18258466,4_18258464,4_18257853,4_18257633,4_18258436	0.0869,0.0435,0.0558,0.0371,0.0171,0.0135,0.0259,0.0244,0.00865,0.0131,0.00977,0.00968,0.00724,0.0037,0.0173,0.00408,0.00451,0.00317,0.00934,0.00185,0.00279,0.00446,0.00419,0.00166,0.00405,0.00155,0.000699,0.014,0.00107,0.00201,0.00171,0.00164,0.000783,0.00095	6.96,5.91,5.04,8.6,5.44,18.4,18.4,6.78,18.2,4.76,6.42,6.3,4.41,4.48,2.2,6.41,6.18,3.94,4.48,5.75,5.47,5.55,3.62,2.26,4.85,2.59,13.2,4.43,2.75,4.41,2.78,1.97,4.22,3.83	1.85e-209,1.56e-121,6.04e-112,2.91e-87,1.32e-75,5.1e-65,6.59e-65,9.39e-56,9.58e-54,1.88e-53,4.12e-43,3.57e-41,1.22e-29,3.88e-27,4.87e-23,8.78e-22,3.65e-21,2.54e-20,6.35e-19,2.59e-14,1.47e-12,4.72e-12,4.47e-10,5.97e-06,8.36e-06,1.46e-05,2.06e-05,7.19e-05,7.29e-05,8.3e-05,0.000467,0.000616,0.000711,0.00462	A:G,A:G,A:G,A:G,A:G,A:G,A:G,A:G,A:G,A:G,A:G,A:G,A:G,A:G,A:G,A:G,A:G,A:G,A:G,A:G,A:G,A:G,A:G,A:G,A:G,A:G,A:G,A:G,A:G,A:G,A:G,A:G,A:G,A:G
AT5G41700	UBC8	+	AT5G41700.1,AT5G41700.3,AT5G41700.4	565.528607,0.72145,0.6643018	14	5_16676103,5_16676112,5_16676116,5_16677106,5_16677191,5_16676618,5_16677396,5_16676815,5_16676791,5_16676115,5_16677185,5_16677222,5_16676505,5_16676617	0.1,0.0307,0.0293,0.005,0.0055,0.0031,0.05,0.00263,0.00333,0.00293,0.00242,0.00307,0.00124,0.0014	4.54,8.23,3.58,15.7,4.89,15.4,14.3,5.03,3.72,4.95,14.7,4.6,13.6,2.72	2.48e-208,3.52e-69,3.51e-27,2.92e-13,2.98e-13,1.71e-10,4.99e-08,1.19e-07,1.28e-07,2.08e-07,1.63e-05,1.75e-05,0.00124,0.00543	A:G,A:G,A:G,A:G,A:G,A:G,A:G,A:G,A:G,A:G,A:G,A:G,A:G,A:G
AT3G53020	RPL24B	-	AT3G53020.1	854.6539172	15	3_19660777,3_19660699,3_19661334,3_19660786,3_19661465,3_19660830,3_19660693,3_19660881,3_19661101,3_19661918,3_19660748,3_19661952,3_19660703,3_19660835,3_19660864	0.158,0.041,0.0152,0.03,0.00238,0.0074,0.00349,0.00107,0.000903,0.00194,0.00128,0.00205,0.00174,0.00141,0.0015	6.55,5.16,4.67,5.01,16.2,4.97,15.1,12.4,4.15,2.37,13.7,13.2,3.72,2.42,1.95	5.77e-198,6.9e-67,1.59e-61,2.35e-45,5.69e-16,1.38e-14,7.04e-07,0.000121,0.000256,0.00127,0.00272,0.00315,0.0058,0.0096,0.00968	T:C,T:C,T:C,T:C,T:C,T:C,T:C,T:C,T:C,T:C,T:C,T:C,T:C,T:C,T:C
AT4G21105	AT4G21105	+	AT4G21105.1,AT4G21105.3,AT4G21105.2	2131.352067,NA,167.0343438	25	4_11266724,4_11266690,4_11266414,4_11266799,4_11266723,4_11266715,4_11266399,4_11266413,4_11266693,4_11266393,4_11266772,4_11266960,4_11266783,4_11266727,4_11266721,4_11266717,4_11266779,4_11266807,4_11267032,4_11266840,4_11266424,4_11266832,4_11266695,4_11266755,4_11266853	0.0835,0.129,0.0982,0.112,0.0429,0.0494,0.0273,0.0173,0.00853,0.00439,0.00984,0.35,0.00355,0.00242,0.0017,0.00333,0.00231,0.00292,0.607,0.00402,0.00125,0.0036,0.000811,0.00133,0.00326	10,8.14,5.8,8.09,20.6,7.53,6.31,6.72,16.7,5.81,15.9,5.78,15.1,4.43,14.5,2.36,4.93,15.3,14.4,4.58,3.21,3.13,4.12,3.35,13.6	1.74e-195,3.02e-195,4.96e-156,7.95e-117,5.47e-89,3.95e-87,2.15e-58,8.72e-53,4.12e-34,4.49e-23,1.6e-19,3.07e-13,1.55e-12,9.33e-10,1.52e-08,5.96e-08,1.85e-07,4.13e-07,3.24e-06,1.1e-05,5.21e-05,0.000104,0.00042,0.000532,0.000665	A:G,A:G,A:G,A:G,A:G,A:G,A:G,A:G,A:G,A:G,A:G,A:G,A:G,A:G,A:G,A:G,A:G,A:G,A:G,A:G,A:G,A:G,A:G,A:G,A:G
AT5G35530	RPS3C	-	AT5G35530.1	230.2031884	30	5_13711736,5_13711696,5_13711948,5_13711738,5_13710661,5_13710330,5_13711667,5_13710328,5_13711747,5_13712026,5_13710418,5_13712170,5_13712199,5_13710394,5_13710423,5_13710331,5_13712177,5_13710542,5_13710498,5_13710726,5_13712233,5_13710735,5_13710391,5_13710758,5_13710778,5_13710400,5_13711694,5_13711693,5_13712069,5_13712198	0.246,0.144,0.0206,0.0164,0.00791,0.0176,0.00655,0.0103,0.00525,0.0116,0.00483,0.00855,0.0101,0.00462,0.00501,0.00537,0.00756,0.00233,0.00154,0.00224,0.0157,0.00202,0.00233,0.00104,0.00215,0.00215,0.0019,0.00129,0.00173,0.00641	3.96,6.12,18,17.2,5.84,16.5,5.9,15.3,15.6,17.1,15.6,15.3,14.5,15.5,3.66,4.76,4.74,3.02,14.3,4.53,12.3,3.26,13.1,13.7,3.22,4.03,14.2,13,12.5,13.7	9.19e-195,1.34e-188,1.21e-43,1.42e-30,2.45e-29,7.13e-24,7.14e-16,5.37e-14,2.96e-13,3.49e-11,1.03e-09,4.14e-08,4.71e-08,8.37e-08,1.63e-07,2.75e-06,3.65e-06,1.19e-05,1.63e-05,2.72e-05,3.44e-05,3.98e-05,0.000118,0.000293,0.0011,0.00139,0.0018,0.00217,0.00356,0.00712	T:C,T:C,T:C,T:C,T:C,T:C,T:C,T:C,T:C,T:C,T:C,T:C,T:C,T:C,T:C,T:C,T:C,T:C,T:C,T:C,T:C,T:C,T:C,T:C,T:C,T:C,T:C,T:C,T:C,T:C
AT2G01250	RPL7B	-	AT2G01250.1,AT2G01250.2	426.7614028,102.0038064	45	2_133050,2_133313,2_133081,2_134251,2_133049,2_133956,2_134236,2_133264,2_133513,2_133951,2_133503,2_134185,2_133325,2_133322,2_133320,2_134252,2_133955,2_133003,2_133353,2_133337,2_132941,2_134244,2_133017,2_133467,2_133274,2_132900,2_133512,2_134238,2_133099,2_133811,2_133039,2_134146,2_133110,2_133307,2_133801,2_133085,2_133980,2_133950,2_133346,2_133275,2_133318,2_134158,2_132960,2_133792,2_1…	0.155,0.0761,0.0329,0.106,0.0313,0.0209,0.0126,0.00927,0.00681,0.00848,0.00575,0.00453,0.0035,0.00414,0.00432,0.00492,0.00493,0.00359,0.00232,0.00303,0.00392,0.00433,0.00344,0.00324,0.00223,0.00485,0.00163,0.00487,0.00268,0.00134,0.00187,0.00177,0.00178,0.000905,0.000693,0.00114,0.000862,0.000599,0.000983,0.00123,0.00081,0.000539,0.00142,0.000664,0.000893	5.93,5.98,4.78,3.34,4.25,5.09,5.67,5.2,4.74,3.68,5.96,4.61,4.86,15.3,3.73,5.4,2.78,5.36,5.27,3.59,13.3,3.79,4.28,3.77,14.9,16,15.9,3.2,3.36,4.8,4.62,2.65,3.76,13.2,12.8,4.15,15,3.13,3.1,2.19,3.8,3.51,3.7,13.1,2.93	1.76e-194,1.14e-135,4.44e-102,1.57e-78,1.72e-69,1.2e-49,5.99e-26,6.04e-26,1.65e-24,1.21e-22,6.8e-15,8.9e-15,1.35e-13,3.77e-13,9.04e-13,3.75e-11,2.39e-10,5.93e-10,1.3e-09,2.4e-09,4.52e-09,5.89e-09,1.37e-08,1.72e-08,2.4e-08,5.62e-08,7.87e-08,1.31e-07,1.35e-07,1.52e-06,8.28e-06,1.04e-05,1.73e-05,0.000361,0.000424,0.00043,0.000697,0.00154,0.00282,0.00286,0.00525,0.00554,0.00614,0.00707,0.00992	T:C,T:C,T:C,T:C,T:C,T:C,T:C,T:C,T:C,T:C,T:C,T:C,T:C,T:C,T:C,T:C,T:C,T:C,T:C,T:C,T:C,T:C,T:C,T:C,T:C,T:C,T:C,T:C,T:C,T:C,T:C,T:C,T:C,T:C,T:C,T:C,T:C,T:C,T:C,T:C,T:C,T:C,T:C,T:C,T:C
AT5G15650	RGP2	+	AT5G15650.1	214.5905632	13	5_5094143,5_5093972,5_5094037,5_5092372,5_5093971,5_5094108,5_5094118,5_5093351,5_5094109,5_5094110,5_5093925,5_5093213,5_5094112	0.256,0.0233,0.0104,0.012,0.00476,0.00295,0.00544,0.00267,0.00202,0.00205,0.00155,0.00312,0.00185	5.09,4.86,4.99,4.23,5.7,15.3,4.05,14.6,12.9,14.4,4.41,2.93,12.2	5.8e-194,3.24e-32,2.07e-29,1.23e-20,5.21e-13,1.81e-07,6.86e-06,2.39e-05,4.02e-05,4.16e-05,5.11e-05,0.000149,0.000192	A:G,A:G,A:G,A:G,A:G,A:G,A:G,A:G,A:G,A:G,A:G,A:G,A:G
AT5G10360	RPS6B	-	AT5G10360.1,AT5G10360.2	470.5643368,0.654461	53	5_3259237,5_3258877,5_3258957,5_3259495,5_3259311,5_3258794,5_3258870,5_3259670,5_3259236,5_3259987,5_3259672,5_3259638,5_3259458,5_3258772,5_3259660,5_3258942,5_3259175,5_3259491,5_3258813,5_3259251,5_3259463,5_3259069,5_3259496,5_3258901,5_3259481,5_3259128,5_3259306,5_3259476,5_3258969,5_3258915,5_3258793,5_3258840,5_3259174,5_3259062,5_3260034,5_3258864,5_3259986,5_3258750,5_3259293,5_3259656…	0.0724,0.0433,0.0209,0.107,0.0182,0.0332,0.0194,0.0161,0.0125,0.0106,0.00895,0.117,0.0153,0.0116,0.0969,0.00704,0.00413,0.0048,0.00635,0.00396,0.00212,0.00321,0.00264,0.00219,0.00182,0.0018,0.00347,0.00161,0.00166,0.00334,0.00576,0.00166,0.00244,0.00251,0.00442,0.00163,0.000965,0.00242,0.00104,0.00156,0.00213,0.0013,0.00127,0.00133,0.00142,0.00157,0.0016,0.000534,0.00344,0.00137,0.00116,0.00183,0…	4.11,7.47,6.32,2.54,17.8,6.21,4.35,5.24,6.59,7.5,7.17,1.43,4.09,5.86,1.72,5.18,15.7,4.56,5.09,3.75,14.7,14.4,3.49,14.5,5.25,14.2,3.79,15.8,14.5,3.73,4.27,13.1,4.98,2.97,4.37,4.76,14.6,3.79,4.48,2.86,4.35,14.2,12.2,2.75,12.1,14.5,2.56,12.7,3.91,13.6,2.15,3.84,2.32	1.64e-192,1.19e-129,3.6e-80,9.63e-69,4.46e-52,1.49e-51,1.54e-48,1.95e-47,6.91e-47,2.59e-46,5.64e-36,1.1e-34,1.81e-31,2.01e-27,1.65e-25,1.29e-22,1.67e-17,1.04e-16,7.58e-16,3.48e-13,1.66e-12,2.37e-11,4.45e-10,4.31e-09,1.97e-08,1.07e-07,1.11e-07,2.18e-07,3.28e-07,3.31e-07,1.1e-06,1.64e-06,1.66e-06,1.76e-06,1.82e-06,2.52e-06,4.08e-06,1.37e-05,2e-05,5.72e-05,0.000122,0.000153,0.000188,0.000434,0.00053…	T:C,T:C,T:C,T:C,T:C,T:C,T:C,T:C,T:C,T:C,T:C,T:C,T:C,T:C,T:C,T:C,T:C,T:C,T:C,T:C,T:C,T:C,T:C,T:C,T:C,T:C,T:C,T:C,T:C,T:C,T:C,T:C,T:C,T:C,T:C,T:C,T:C,T:C,T:C,T:C,T:C,T:C,T:C,T:C,T:C,T:C,T:C,T:C,T:C,T:C,T:C,T:C,T:C
AT3G02090	MPPBETA	+	AT3G02090.1,AT3G02090.2	84.132533,40.0052766	15	3_368581,3_368538,3_367295,3_367365,3_368539,3_368619,3_368540,3_367152,3_368589,3_368566,3_368265,3_368506,3_368327,3_367090,3_365650	0.242,0.0411,0.0596,0.0426,0.0119,0.0134,0.0127,0.0131,0.0058,0.00296,0.00258,0.00195,0.00236,0.00186,0.00244	5.82,17.8,3.76,4.47,15.5,6.33,6.34,3.74,14.5,4.57,3.23,4.31,3.11,3.72,12.3	1.02e-190,3.48e-59,3.65e-47,2.96e-40,1.27e-26,8.25e-19,2.63e-18,1.66e-12,3.32e-11,2.31e-05,3.22e-05,0.000168,0.000182,0.00423,0.00616	A:G,A:G,A:G,A:G,A:G,A:G,A:G,A:G,A:G,A:G,A:G,A:G,A:G,A:G,A:G
AT2G44120	RPL7C	-	AT2G44120.2,AT2G44120.1	228.959881,0	31	2_18249222,2_18249505,2_18249498,2_18250254,2_18249357,2_18250303,2_18249256,2_18249309,2_18250230,2_18249503,2_18250264,2_18249223,2_18249518,2_18250310,2_18249506,2_18249492,2_18250296,2_18249253,2_18249507,2_18249252,2_18250299,2_18249306,2_18250251,2_18249459,2_18249493,2_18249444,2_18250084,2_18250322,2_18250266,2_18250376,2_18250757	0.167,0.0557,0.0301,0.0201,0.0284,0.0114,0.0112,0.0115,0.00679,0.0125,0.00929,0.0122,0.0103,0.00878,0.00889,0.0063,0.00469,0.00582,0.00354,0.00438,0.00526,0.00544,0.00178,0.00215,0.00215,0.00429,0.00134,0.00131,0.00115,0.00229,0.00191	8.86,6.69,7.91,5.4,4.97,5.21,15.4,15.4,6.31,3.88,3.35,15.5,6.16,4.09,15.4,14.5,4.66,5.59,15.5,15.5,4.56,3.28,4.48,13,4.35,2.9,2.98,3.77,13.8,3.89,12	5.71e-190,1.76e-73,1.66e-54,4.33e-52,5.16e-40,4.73e-30,1.34e-24,2.73e-24,2.39e-21,1.88e-20,2.1e-17,1.42e-16,4.45e-16,3.71e-15,3.62e-14,1.89e-12,2.29e-12,9.8e-12,1.66e-09,2.37e-09,3.2e-09,8.24e-07,1.54e-05,5.86e-05,0.000104,0.000125,0.00297,0.00302,0.00389,0.00458,0.00691	T:C,T:C,T:C,T:C,T:C,T:C,T:C,T:C,T:C,T:C,T:C,T:C,T:C,T:C,T:C,T:C,T:C,T:C,T:C,T:C,T:C,T:C,T:C,T:C,T:C,T:C,T:C,T:C,T:C,T:C,T:C
AT5G27770	RPL22C	+	AT5G27770.1	871.8750034	20	5_9837104,5_9836359,5_9837107,5_9836980,5_9837001,5_9837004,5_9836977,5_9836310,5_9837115,5_9836298,5_9836383,5_9836311,5_9836178,5_9836995,5_9836200,5_9837003,5_9836384,5_9837095,5_9837112,5_9837027	0.146,0.0391,0.0395,0.0157,0.00861,0.0132,0.0141,0.0162,0.0134,0.0103,0.00539,0.00246,0.00501,0.0013,0.00124,0.00094,0.00112,0.00156,0.00202,0.00114	8.76,5.9,5.38,6,17.8,7.06,5.37,4.26,17.5,6.19,3.9,4.33,3.62,3.76,13.5,4.23,3.38,3.94,3.84,3.05	2.98e-187,6.52e-87,2.05e-58,2.83e-48,5.69e-31,2.66e-30,5.11e-29,1.58e-24,1.45e-20,7.06e-17,8.57e-13,2.29e-09,4.94e-07,9.54e-06,0.000106,0.000203,0.000238,0.00166,0.00186,0.007	A:G,A:G,A:G,A:G,A:G,A:G,A:G,A:G,A:G,A:G,A:G,A:G,A:G,A:G,A:G,A:G,A:G,A:G,A:G,A:G
AT2G19740	RPL31A	+	AT2G19740.1	254.2851214	16	2_8514247,2_8514361,2_8514320,2_8513623,2_8514357,2_8514259,2_8514371,2_8514363,2_8513640,2_8514301,2_8514258,2_8514337,2_8514158,2_8513625,2_8514243,2_8514255	0.328,0.0698,0.0356,0.0409,0.0456,0.00635,0.00667,0.00656,0.00817,0.00361,0.00403,0.00378,0.00171,0.00249,0.00211,0.0022	4.94,7.85,7.28,5.78,6.92,14.5,14.6,14.5,3.42,13.1,13.2,13.7,12.5,3.8,3.58,3.58	2.75e-183,6.27e-60,2.72e-41,6.38e-33,1.89e-29,8.31e-09,1.95e-06,3.33e-06,6.12e-06,9.74e-05,0.000201,0.000229,0.00123,0.00399,0.00921,0.00922	A:G,A:G,A:G,A:G,A:G,A:G,A:G,A:G,A:G,A:G,A:G,A:G,A:G,A:G,A:G,A:G
AT4G27000	RBP45C	-	AT4G27000.1	63.5040214	25	4_13554794,4_13554788,4_13555412,4_13554905,4_13554789,4_13554942,4_13554787,4_13554762,4_13557675,4_13554862,4_13557280,4_13554969,4_13554946,4_13557582,4_13554790,4_13554970,4_13557309,4_13555799,4_13555101,4_13557046,4_13554910,4_13557457,4_13557793,4_13555170,4_13557358	0.385,0.367,0.0921,0.0726,0.118,0.0353,0.107,0.14,0.0532,0.0271,0.0241,0.0094,0.00829,0.0202,0.0292,0.00365,0.00659,0.00303,0.0035,0.00457,0.00364,0.00325,0.00865,0.00291,0.00353	6.94,6.23,7.19,5.73,17.1,7.54,16.9,15.9,5.43,15.6,4.26,5.58,5.47,3.58,5.37,13.8,4.2,13.5,13.1,12,4.01,13.5,3.62,3.78,3.57	3.53e-183,5.19e-92,2.01e-64,4.47e-60,1.87e-50,1.52e-46,2.41e-40,1.09e-38,1.99e-33,4.09e-22,6.72e-12,1.47e-11,1.81e-10,1.55e-09,9.5e-09,3.17e-05,0.000256,0.00111,0.00128,0.00144,0.00166,0.00496,0.00499,0.00507,0.00858	T:C,T:C,T:C,T:C,T:C,T:C,T:C,T:C,T:C,T:C,T:C,T:C,T:C,T:C,T:C,T:C,T:C,T:C,T:C,T:C,T:C,T:C,T:C,T:C,T:C
AT1G67430	RPL17B	+	AT1G67430.1,AT1G67430.2	677.8489356,0.5637866	35	1_25262349,1_25262967,1_25263626,1_25263618,1_25262961,1_25262481,1_25263048,1_25263474,1_25263641,1_25263005,1_25262960,1_25263692,1_25262979,1_25263049,1_25263452,1_25263059,1_25263604,1_25262447,1_25263470,1_25263310,1_25263666,1_25263338,1_25262929,1_25263489,1_25263053,1_25263465,1_25263299,1_25262202,1_25262973,1_25263467,1_25262338,1_25263126,1_25263068,1_25263092,1_25263488	0.183,0.0223,0.0588,0.029,0.0316,0.0211,0.0123,0.0104,0.0131,0.00751,0.00673,0.016,0.00335,0.00385,0.00712,0.00384,0.00383,0.003,0.00178,0.00256,0.00334,0.00166,0.000914,0.00174,0.00195,0.00141,0.000715,0.00767,0.00138,0.000837,0.00114,0.000546,0.000793,0.000708,0.000797	4.17,6.32,8.5,5.41,5.46,5.5,17.3,6.21,7.01,5.67,3.15,6.38,15.4,6.3,5.36,3.39,15.2,3.35,4.72,3.52,15,3.05,4.33,2.81,3.7,4.19,13.3,4.01,2.26,3.94,12.4,12.8,3.97,14.8,3.59	4.99e-182,3.3e-81,7.67e-79,7.02e-62,1.1e-60,4.77e-47,4.35e-37,4.38e-35,4.34e-34,3.5e-24,1.2e-21,1.27e-21,1.06e-20,1.67e-20,3.3e-19,6.16e-15,4.53e-10,7.93e-08,1.75e-07,1.95e-07,3.54e-07,7.03e-06,5.69e-05,0.000126,0.00016,0.000523,0.000599,0.000658,0.00132,0.00145,0.00156,0.00187,0.00285,0.00705,0.00881	A:G,A:G,A:G,A:G,A:G,A:G,A:G,A:G,A:G,A:G,A:G,A:G,A:G,A:G,A:G,A:G,A:G,A:G,A:G,A:G,A:G,A:G,A:G,A:G,A:G,A:G,A:G,A:G,A:G,A:G,A:G,A:G,A:G,A:G,A:G
AT3G46430	AT3G46430	+	AT3G46430.1	1181.9287212	14	3_17088000,3_17088714,3_17088679,3_17088603,3_17088519,3_17087981,3_17088533,3_17088549,3_17088535,3_17088554,3_17088570,3_17088651,3_17088506,3_17087974	0.279,0.173,0.124,0.0245,0.00976,0.0104,0.0112,0.0061,0.00967,0.00658,0.00583,0.00827,0.00175,0.00375	5.85,17.5,17.5,15,16.5,6.16,15.3,14.4,4.32,13.9,14.4,12.8,12,3.31	8.85e-182,1.35e-65,1.43e-54,1.16e-25,2.89e-19,1.6e-17,1.23e-11,1.04e-08,1.64e-08,9.65e-07,1.11e-06,3.42e-05,7e-04,0.00205	A:G,A:G,A:G,A:G,A:G,A:G,A:G,A:G,A:G,A:G,A:G,A:G,A:G,A:G
AT4G09800	RPS18A	+	AT4G09800.1	443.8982356	39	4_6174588,4_6174628,4_6173816,4_6174644,4_6174680,4_6174667,4_6174314,4_6174692,4_6174627,4_6174727,4_6174935,4_6174928,4_6174674,4_6174906,4_6174934,4_6174332,4_6174758,4_6174702,4_6174299,4_6173766,4_6174298,4_6174967,4_6174953,4_6174334,4_6174248,4_6175152,4_6174665,4_6174860,4_6174337,4_6174952,4_6174881,4_6174974,4_6174311,4_6174933,4_6174242,4_6173793,4_6174951,4_6174643,4_6174206	0.0767,0.0543,0.107,0.037,0.477,0.0243,0.0183,0.0295,0.02,0.027,0.0303,0.0272,0.00942,0.00879,0.00857,0.00536,0.00539,0.00733,0.00763,0.0283,0.00334,0.00579,0.00561,0.00368,0.00218,0.222,0.00349,0.00143,0.00393,0.00229,0.00143,0.00424,0.00114,0.00214,0.00077,0.00168,0.00233,0.00236,0.000938	6.13,8.11,7.79,6.22,2.59,6.47,7.92,6.22,6.15,6.41,7.07,6.89,5.61,6.35,16.4,16.1,5.99,4.45,5.84,15.1,5.53,14.4,14.4,3.55,4.07,13.8,5,13.2,2.23,13.5,12.4,13.3,13.9,4.09,12.8,12.5,4.16,1.81,13.1	2.47e-177,1.48e-132,1.73e-101,3.96e-91,3.09e-84,1.33e-68,8.62e-63,1.76e-53,4.05e-51,9.51e-40,9.23e-30,3.3e-28,1.11e-22,1.36e-20,1.19e-17,1.47e-15,1.62e-15,1.68e-15,1.39e-13,3.35e-13,5.66e-12,1.3e-10,3.6e-10,6.1e-09,1.34e-07,2.39e-07,2.76e-07,8.12e-05,9.79e-05,0.000107,0.000136,0.000421,0.000439,0.000498,0.00146,0.0015,0.00187,0.00248,0.00418	A:G,A:G,A:G,A:G,A:G,A:G,A:G,A:G,A:G,A:G,A:G,A:G,A:G,A:G,A:G,A:G,A:G,A:G,A:G,A:G,A:G,A:G,A:G,A:G,A:G,A:G,A:G,A:G,A:G,A:G,A:G,A:G,A:G,A:G,A:G,A:G,A:G,A:G,A:G
AT3G08580	AAC1	-	AT3G08580.1,AT3G08580.2	815.6034358,NA	23	3_2605803,3_2606269,3_2606602,3_2606295,3_2606699,3_2605842,3_2605892,3_2606282,3_2606239,3_2606844,3_2605912,3_2605884,3_2606907,3_2605706,3_2605612,3_2605707,3_2606421,3_2606939,3_2606903,3_2607030,3_2605632,3_2605838,3_2605830	0.092,0.0176,0.00338,0.00221,0.00254,0.00145,0.00197,0.00166,0.00102,0.00135,0.00175,0.00125,0.00121,0.000676,0.00145,0.00113,0.000579,0.00115,0.000538,0.000737,0.000753,0.000703,0.000977	5.29,4.37,6.57,3.69,3.52,5.18,3.62,3.69,4.88,3.97,3.91,4.02,3.05,13.1,3.31,4.53,3.18,2.1,3.67,3.43,3.67,3.12,1.87	1.3e-174,2.65e-48,4.47e-27,8.25e-10,1.06e-09,4.74e-09,8.16e-09,6.61e-08,2.47e-07,3.82e-07,6.32e-07,9.55e-07,3.07e-05,0.000273,0.00057,0.000674,0.00126,0.00139,0.00445,0.0062,0.00673,0.00676,0.00884	T:C,T:C,T:C,T:C,T:C,T:C,T:C,T:C,T:C,T:C,T:C,T:C,T:C,T:C,T:C,T:C,T:C,T:C,T:C,T:C,T:C,T:C,T:C
AT2G21580	RPS25B	+	AT2G21580.1,AT2G21580.2	890.1420436,5.9123408	17	2_9237400,2_9237435,2_9237427,2_9237503,2_9237443,2_9237436,2_9237258,2_9237167,2_9237161,2_9237502,2_9237512,2_9237259,2_9237509,2_9237454,2_9237223,2_9236792,2_9237166	0.243,0.0745,0.0565,0.0586,0.0369,0.0266,0.0106,0.00981,0.00757,0.00627,0.00712,0.00266,0.00387,0.00332,0.00101,0.00127,0.000838	3.38,5.63,5.2,8.22,6.77,18.5,7.18,4.13,2.92,5.62,14.7,5.05,4.95,2.87,14.7,3.35,13.4	2.15e-173,2.67e-99,1.07e-87,2.17e-64,8.72e-49,7.63e-42,4.57e-38,1.88e-25,9.54e-14,6.48e-12,1.16e-09,1.19e-08,2.06e-07,3.52e-06,1.01e-05,0.000317,0.000359	A:G,A:G,A:G,A:G,A:G,A:G,A:G,A:G,A:G,A:G,A:G,A:G,A:G,A:G,A:G,A:G,A:G
AT4G01100	ADNT1	+	AT4G01100.1,AT4G01100.2,AT4G01100.3	125.5294156,0.204364,0.0667798	8	4_479576,4_479661,4_479811,4_479512,4_478940,4_477479,4_478777,4_479110	0.152,0.00405,0.008,0.00266,0.0045,0.00445,0.00258,0.00251	5.29,13.4,12.9,13.7,3.33,2.73,12.6,2.76	5.4e-173,3.74e-06,1.24e-05,1.5e-05,0.000955,0.00162,0.00167,0.00983	A:G,A:G,A:G,A:G,A:G,A:G,A:G,A:G
AT1G30580	AT1G30580	-	AT1G30580.1	102.0957598	20	1_10831884,1_10831883,1_10832038,1_10831808,1_10834972,1_10832291,1_10831869,1_10833847,1_10833752,1_10831885,1_10832040,1_10832276,1_10831956,1_10832041,1_10833964,1_10832965,1_10834222,1_10832923,1_10835474,1_10832254	0.506,0.121,0.0147,0.0524,0.00836,0.00542,0.0104,0.00826,0.00352,0.00575,0.00378,0.00472,0.00419,0.00183,0.00228,0.00222,0.00215,0.00193,0.00615,0.00187	5.65,19,6.5,15.6,4.32,15.6,14.7,3.52,4.65,13.9,13.1,3.7,14,12.1,12.9,3.05,12.2,12.2,12.9,2.96	1.33e-172,1.04e-64,1.41e-21,1.07e-15,2.11e-09,4.1e-09,3.35e-08,8.78e-07,3.03e-06,5.9e-06,7e-06,2.8e-05,0.00018,0.000357,0.000878,0.00326,0.00393,0.00417,0.00543,0.00622	T:C,T:C,T:C,T:C,T:C,T:C,T:C,T:C,T:C,T:C,T:C,T:C,T:C,T:C,T:C,T:C,T:C,T:C,T:C,T:C
AT4G00585	AT4G00585	-	AT4G00585.1	744.649545	20	4_251155,4_251124,4_251089,4_251168,4_252291,4_251088,4_252176,4_251084,4_251065,4_251087,4_251182,4_251131,4_251156,4_251090,4_251111,4_251086,4_251167,4_251245,4_251166,4_251085	0.391,0.138,0.433,0.0411,0.0388,0.0639,0.0181,0.0958,0.0531,0.0265,0.00959,0.0116,0.00752,0.0178,0.011,0.016,0.00293,0.00175,0.00398,0.00631	4.92,19.2,3.93,6.68,6.32,16,5.56,5.9,15.6,5.79,5.62,14.9,14.3,14.1,13.3,13.9,13.9,14.1,3.36,12.5	6.86e-172,8.6e-75,4.74e-55,1.4e-50,6.87e-40,1.83e-35,5.01e-27,2.67e-26,1.42e-17,2.36e-13,2.18e-11,3.68e-11,1.53e-10,1.58e-10,3.96e-08,6.39e-08,0.000184,0.000216,0.000644,0.000887	T:C,T:C,T:C,T:C,T:C,T:C,T:C,T:C,T:C,T:C,T:C,T:C,T:C,T:C,T:C,T:C,T:C,T:C,T:C,T:C
AT1G70600	RPL27AC	-	AT1G70600.1	445.4164162	22	1_26621164,1_26621230,1_26621509,1_26621211,1_26621289,1_26621459,1_26621208,1_26621357,1_26621290,1_26621132,1_26621198,1_26621223,1_26621339,1_26621084,1_26621277,1_26621334,1_26621257,1_26621454,1_26621563,1_26621421,1_26621256,1_26621410	0.203,0.0637,0.0213,0.0208,0.00997,0.00862,0.008,0.00481,0.00591,0.0056,0.00552,0.0024,0.00172,0.00566,0.00187,0.00216,0.00148,0.00148,0.00118,0.000616,0.00117,0.000403	5.45,6.9,5.91,7.89,6.15,3.58,4.89,3.48,4.86,16.2,3.34,14.5,4.18,4.94,4.92,2.68,4.59,2.81,4.04,3.12,2.97,3.57	4.46e-170,1.2e-86,1.34e-79,2.63e-63,2.05e-34,9.51e-24,4.3e-21,1.85e-15,1.5e-13,8.61e-12,2.37e-09,7.3e-09,3.15e-08,2.56e-07,5.57e-07,5.94e-06,8.74e-06,9.02e-06,0.00051,0.00173,0.00211,0.00923	T:C,T:C,T:C,T:C,T:C,T:C,T:C,T:C,T:C,T:C,T:C,T:C,T:C,T:C,T:C,T:C,T:C,T:C,T:C,T:C,T:C,T:C
AT3G09500	RPL35A	+	AT3G09500.1	2260.5064278	26	3_2917635,3_2917835,3_2917572,3_2917846,3_2917618,3_2917849,3_2917664,3_2917682,3_2917852,3_2917676,3_2917008,3_2917034,3_2917632,3_2917665,3_2917039,3_2917626,3_2917593,3_2917848,3_2917889,3_2917182,3_2917567,3_2917941,3_2917691,3_2917888,3_2917667,3_2917599	0.0656,0.0804,0.0844,0.0588,0.00986,0.0231,0.0106,0.0141,0.0229,0.00953,0.0278,0.00497,0.00197,0.00218,0.00489,0.00188,0.00192,0.00261,0.00339,0.00142,0.00215,0.00254,0.00146,0.00187,0.00079,0.000634	5.16,4.82,4.24,4.93,6.37,4.72,5.47,4.34,7.1,4.98,5.97,5.71,4.81,5.43,4.73,4.69,3.36,4.59,5.08,4.91,1.9,13.2,2.78,3.91,2.7,2.98	1.28e-169,6.11e-109,1.23e-82,7.8e-67,2.22e-63,4.83e-49,3.79e-44,5.76e-38,1.7e-29,8.51e-28,1.15e-16,1.26e-13,1.28e-13,1.41e-13,8.67e-13,5.66e-12,1.03e-09,1.34e-08,2.46e-08,3.18e-07,1.21e-06,0.000234,0.00037,0.00114,0.00202,0.00365	A:G,A:G,A:G,A:G,A:G,A:G,A:G,A:G,A:G,A:G,A:G,A:G,A:G,A:G,A:G,A:G,A:G,A:G,A:G,A:G,A:G,A:G,A:G,A:G,A:G,A:G
AT5G60390	A3	+	AT5G60390.1,AT5G60390.2,AT5G60390.3	907.8069602,NA	42	5_24290568,5_24290581,5_24289840,5_24290443,5_24290604,5_24290605,5_24290167,5_24289816,5_24290633,5_24290250,5_24290723,5_24290382,5_24290527,5_24289902,5_24290352,5_24290490,5_24290647,5_24290455,5_24290106,5_24288723,5_24290442,5_24289960,5_24290607,5_24290107,5_24290725,5_24290278,5_24290401,5_24290678,5_24289919,5_24290577,5_24290227,5_24290732,5_24290670,5_24290050,5_24290245,5_24290726,5_2…	0.123,0.0249,0.0127,0.0744,0.00722,0.00653,0.00519,0.00652,0.00609,0.00282,0.00462,0.00322,0.00301,0.00458,0.00414,0.00264,0.00419,0.00255,0.00312,0.0147,0.00364,0.00295,0.00148,0.0013,0.0012,0.00128,0.00208,0.00224,0.00125,0.00147,0.000891,0.000707,0.000694,0.000829,0.00069,0.000692,0.000885,0.000993,0.000478,0.000391,0.000528,0.000571	4.3,5.75,6.28,4.51,5.43,5.76,5.6,3.3,5.47,6.56,5.54,4.61,3.66,4.15,3.45,3.39,3.68,3.48,3.96,1.23,5.12,2.13,3.7,3.58,15.4,3.35,1.97,3,2.74,2.17,2.91,13.2,13.2,14.8,2.97,14.2,2.49,2.48,2.86,3.75,2.78,2.38	1.82e-169,1.02e-150,3.19e-84,2.36e-47,1.17e-40,3.57e-40,9.99e-36,1.97e-34,4.34e-30,6.98e-26,1.06e-23,1.24e-22,8.71e-18,2.09e-17,9.86e-16,1.1e-15,1.15e-15,4.18e-15,5.77e-13,1.4e-11,5.35e-11,5.14e-10,3.68e-08,1.04e-07,1.39e-07,1.01e-06,1.79e-06,9.19e-06,1.29e-05,2.37e-05,9.83e-05,0.000168,0.000172,0.000179,0.000278,0.000293,0.000477,0.00105,0.00546,0.00578,0.00671,0.00814	A:G,A:G,A:G,A:G,A:G,A:G,A:G,A:G,A:G,A:G,A:G,A:G,A:G,A:G,A:G,A:G,A:G,A:G,A:G,A:G,A:G,A:G,A:G,A:G,A:G,A:G,A:G,A:G,A:G,A:G,A:G,A:G,A:G,A:G,A:G,A:G,A:G,A:G,A:G,A:G,A:G,A:G
AT5G47570	AT5G47570	-	AT5G47570.1	552.1283766	16	5_19292839,5_19292834,5_19292878,5_19292837,5_19294406,5_19294378,5_19294195,5_19294451,5_19292840,5_19294369,5_19292895,5_19294422,5_19292876,5_19294196,5_19294272,5_19294394	0.23,0.0864,0.0147,0.0274,0.0198,0.00709,0.00633,0.00263,0.00428,0.00161,0.00233,0.00152,0.00229,0.00164,0.0013,0.00197	7.22,20.2,6.03,16.6,4.46,6.25,16.4,4.92,4.64,14.4,3.48,4.1,4.24,4.03,3.92,3.15	3.95e-169,1.21e-76,1.99e-33,5.27e-32,1.94e-31,8.2e-20,1.77e-13,5.39e-07,2.75e-05,7.89e-05,0.000143,0.000277,0.000523,8e-04,0.00115,0.00179	T:C,T:C,T:C,T:C,T:C,T:C,T:C,T:C,T:C,T:C,T:C,T:C,T:C,T:C,T:C,T:C
AT1G41880	RPL35AB	-	AT1G41880.1,AT1G41880.2	574.671229,NA	11	1_15651764,1_15651620,1_15651618,1_15651157,1_15651283,1_15651160,1_15652400,1_15651596,1_15651267,1_15651191,1_15651277	0.208,0.143,0.0556,0.0628,0.017,0.051,0.00651,0.00605,0.0162,0.0196,0.00236	3.84,4.83,7.01,14.9,15.6,14,4.52,14.4,16.3,14,12.4	8.93e-169,6.14e-107,4.56e-96,1.25e-14,4.96e-13,5.61e-12,8.06e-11,1.42e-09,3.77e-09,3.25e-07,0.00286	T:C,T:C,T:C,T:C,T:C,T:C,T:C,T:C,T:C,T:C,T:C
AT3G08610	AT3G08610	-	AT3G08610.1	1501.4703622	25	3_2616488,3_2615637,3_2615640,3_2616668,3_2616426,3_2615653,3_2615634,3_2616482,3_2615632,3_2615654,3_2615655,3_2616521,3_2615615,3_2615643,3_2615679,3_2615641,3_2616456,3_2616438,3_2615631,3_2615680,3_2615658,3_2616450,3_2616468,3_2615618,3_2615635	0.226,0.307,0.0922,0.0343,0.0228,0.0406,0.0229,0.0126,0.0214,0.0306,0.0084,0.00552,0.00829,0.00542,0.00337,0.00475,0.00231,0.00218,0.00438,0.00206,0.00187,0.00144,0.00175,0.00198,0.0014	5.58,6.11,6.99,5.7,6.61,6.5,7.35,6.11,18.1,5.97,6.27,4.54,16.3,15.1,15,3.62,4.78,3.63,3.9,4.45,4.23,4.11,3.33,4.01,3.68	1.12e-167,2.58e-137,5.71e-106,3.34e-66,5.31e-47,1.96e-44,3.47e-39,1.95e-37,5.47e-31,4.01e-30,1.59e-19,1.36e-16,7.76e-13,4.61e-11,3.37e-10,3.56e-07,1.5e-06,6.78e-06,2.27e-05,4.85e-05,0.000157,0.000437,0.000871,0.000911,0.00554	T:C,T:C,T:C,T:C,T:C,T:C,T:C,T:C,T:C,T:C,T:C,T:C,T:C,T:C,T:C,T:C,T:C,T:C,T:C,T:C,T:C,T:C,T:C,T:C,T:C
AT1G64230	UBC28	+	AT1G64230.1,AT1G64230.4,AT1G64230.3	534.394686,1.0285586,0.6969206	23	1_23835258,1_23835329,1_23834957,1_23833632,1_23834989,1_23833835,1_23833646,1_23833802,1_23834759,1_23835277,1_23833804,1_23834922,1_23834984,1_23835298,1_23834929,1_23833815,1_23834925,1_23833650,1_23833643,1_23835281,1_23834923,1_23834778,1_23835136	0.267,0.224,0.0215,0.0171,0.00774,0.004,0.00633,0.00905,0.00526,0.00775,0.00554,0.00262,0.00347,0.00583,0.00193,0.00187,0.00187,0.00292,0.0018,0.00534,0.00164,0.00273,0.00199	3.57,19.4,4.13,6.47,6.29,4.32,16.3,2.77,4.79,14.3,3.27,4.04,13.7,13.9,14.2,2.88,4.47,3.55,14.5,3.56,3.26,2.38,2.76	4.31e-164,4.21e-94,2.67e-29,3.4e-21,5.04e-18,6.2e-15,2.27e-14,3.12e-13,3.83e-11,1.59e-09,2.89e-09,7.44e-07,3.28e-06,6.34e-06,1.26e-05,4.42e-05,8.97e-05,9e-05,0.000133,0.00014,0.000167,0.000511,0.00454	A:G,A:G,A:G,A:G,A:G,A:G,A:G,A:G,A:G,A:G,A:G,A:G,A:G,A:G,A:G,A:G,A:G,A:G,A:G,A:G,A:G,A:G,A:G
AT3G27430	PBB1	+	AT3G27430.2,AT3G27430.3,AT3G27430.1	102.271592,0.0168332,0	14	3_10154258,3_10153584,3_10154987,3_10153642,3_10154348,3_10155049,3_10155028,3_10155051,3_10154229,3_10155090,3_10155037,3_10154817,3_10154833,3_10154837	0.265,0.0227,0.0209,0.00992,0.0125,0.00673,0.0126,0.00555,0.00615,0.00373,0.00301,0.00342,0.00224,0.00207	4.38,5.68,6.57,5.52,14.8,14.6,3.62,4.93,14.5,13.7,13.4,2.68,2.97,3.62	4.47e-164,8.43e-27,6.11e-22,5.03e-12,2.37e-09,2.88e-09,7.62e-09,1.66e-07,1.92e-06,4.34e-05,5.7e-05,0.000384,0.00623,0.00736	A:G,A:G,A:G,A:G,A:G,A:G,A:G,A:G,A:G,A:G,A:G,A:G,A:G,A:G
AT4G27090	RPL14B	-	AT4G27090.1	2048.928502	26	4_13594483,4_13594277,4_13594140,4_13594448,4_13594895,4_13594505,4_13594359,4_13594953,4_13594158,4_13594256,4_13594284,4_13594927,4_13594904,4_13594355,4_13595205,4_13594860,4_13594026,4_13594262,4_13594023,4_13594141,4_13594484,4_13594952,4_13594047,4_13594332,4_13594344,4_13594906	0.134,0.0548,0.0444,0.00801,0.0144,0.00475,0.00613,0.00562,0.00464,0.00269,0.00199,0.0016,0.00213,0.0016,0.00354,0.00119,0.00397,0.00165,0.00289,0.00103,0.000582,0.00115,0.00182,0.000968,0.00177,0.000834	4.06,6.52,6.57,5.01,5.09,4.11,3.37,4.26,3.61,4.19,5.43,4.32,3.96,3.54,5.02,3.5,4.73,3.37,12.8,4.14,4.22,4.2,3.98,2.15,1.51,2.2	3.6e-161,1.3e-160,6.39e-65,6.52e-47,5.35e-45,2.26e-28,2.34e-19,3.46e-13,1.37e-12,5.89e-12,6.08e-11,1.47e-09,9.17e-09,1.16e-08,3.3e-08,5.66e-08,2.06e-06,3.58e-06,1.85e-05,0.000106,0.000132,0.000171,0.00122,0.00186,0.00345,0.00401	T:C,T:C,T:C,T:C,T:C,T:C,T:C,T:C,T:C,T:C,T:C,T:C,T:C,T:C,T:C,T:C,T:C,T:C,T:C,T:C,T:C,T:C,T:C,T:C,T:C,T:C
AT1G65290	MTACP2	-	AT1G65290.1	792.8477614	24	1_24249079,1_24249114,1_24248976,1_24249080,1_24249027,1_24249205,1_24249026,1_24249040,1_24250216,1_24249087,1_24250300,1_24249085,1_24250384,1_24249232,1_24250338,1_24248935,1_24248970,1_24248979,1_24249154,1_24249020,1_24249241,1_24250188,1_24250214,1_24249077	0.297,0.0518,0.0328,0.0155,0.0156,0.00797,0.0125,0.0101,0.00195,0.00421,0.00213,0.00274,0.0122,0.00126,0.00166,0.00413,0.00325,0.00326,0.000982,0.00193,0.000955,0.000698,0.000974,0.00115	5.53,6.04,6.26,7.05,6.75,4.45,16.9,16.6,5.12,5.2,4.81,15.2,12.5,4.4,13.9,14.3,4.26,3.34,13.3,14.7,3.93,13.1,2.64,3.58	1.54e-160,6.51e-64,1.01e-36,1.58e-31,4.59e-26,1.21e-24,2.45e-16,8.63e-16,1.23e-09,1.28e-08,4.21e-07,1.27e-06,4.89e-06,4.4e-05,7.38e-05,0.000131,0.000178,0.000541,0.000702,0.000724,0.00114,0.0012,0.00716,0.00972	T:C,T:C,T:C,T:C,T:C,T:C,T:C,T:C,T:C,T:C,T:C,T:C,T:C,T:C,T:C,T:C,T:C,T:C,T:C,T:C,T:C,T:C,T:C,T:C
AT5G27850	RPL18C	+	AT5G27850.1,AT5G27850.2	746.442872,2.1229902	36	5_9874148,5_9873525,5_9874290,5_9873648,5_9874300,5_9873408,5_9873898,5_9874248,5_9873877,5_9873961,5_9874019,5_9873631,5_9874275,5_9873878,5_9873623,5_9873616,5_9873372,5_9873979,5_9873990,5_9874269,5_9874238,5_9873647,5_9874296,5_9874349,5_9873973,5_9873414,5_9874297,5_9873875,5_9873941,5_9874161,5_9873937,5_9873641,5_9873561,5_9873426,5_9873901,5_9874051	0.0992,0.116,0.0766,0.0499,0.0589,0.0446,0.0427,0.0401,0.0123,0.0223,0.011,0.0111,0.018,0.00936,0.0051,0.0033,0.0122,0.00666,0.0054,0.00643,0.00539,0.00266,0.00386,0.00489,0.00243,0.00208,0.00224,0.00271,0.00153,0.000811,0.00108,0.00124,0.000608,0.000612,0.00067,0.00104	6.2,3.42,6.83,4.33,7.71,4.16,5.08,5.44,6,6.41,5.69,5.1,6.32,5.46,4.9,6.36,4.69,4.85,5.21,4.08,4.48,4.33,15.3,5.56,4.11,5.11,4.7,2.86,3.37,14.7,3.68,2.9,4.02,13.9,3.06,2.9	2.62e-160,4.5e-134,2.78e-133,8.19e-94,2.35e-93,1.09e-90,6.26e-83,1.99e-73,1.41e-67,8.03e-60,1.81e-50,3.39e-40,1.26e-37,4.4e-31,2.44e-29,1.74e-22,4.05e-22,1.16e-21,1.61e-19,5.95e-18,1.79e-15,4.03e-14,5.12e-12,7.27e-12,7.67e-12,1.03e-08,3.02e-06,6.97e-06,7.52e-06,2.09e-05,2.7e-05,3.55e-05,0.00057,0.00115,0.00292,0.0039	A:G,A:G,A:G,A:G,A:G,A:G,A:G,A:G,A:G,A:G,A:G,A:G,A:G,A:G,A:G,A:G,A:G,A:G,A:G,A:G,A:G,A:G,A:G,A:G,A:G,A:G,A:G,A:G,A:G,A:G,A:G,A:G,A:G,A:G,A:G,A:G
AT2G19730	RPL28A	+	AT2G19730.1,AT2G19730.2,AT2G19730.3	858.9245696,NA	26	2_8512412,2_8512995,2_8512478,2_8513010,2_8512951,2_8513133,2_8512418,2_8512924,2_8512419,2_8512532,2_8512930,2_8511839,2_8512960,2_8513011,2_8512466,2_8511888,2_8512989,2_8511827,2_8512982,2_8512892,2_8512907,2_8511834,2_8512528,2_8512889,2_8512465,2_8512994	0.0619,0.0669,0.0256,0.0205,0.0175,0.047,0.00384,0.00432,0.00706,0.00356,0.00447,0.00261,0.00362,0.00637,0.00176,0.00225,0.00271,0.00156,0.00222,0.00108,0.0022,0.000938,0.000846,0.000601,0.000762,0.00147	5.02,7.33,8.43,7.39,4.39,15.5,6.47,16.7,3.05,15.5,5.29,16.5,5.68,3.94,5.13,3.65,14.1,3.28,4.62,4.42,3.1,3.48,4.2,12.8,3.12,2.98	3.5e-159,3.26e-113,5.91e-70,1.68e-40,6.59e-33,3.48e-30,4.02e-23,1.49e-20,5.02e-20,6.48e-20,1.08e-18,3e-15,1.37e-13,4e-09,1.43e-07,1.21e-06,9.76e-06,2.83e-05,3.5e-05,4.57e-05,6.11e-05,0.000108,0.000681,0.00182,0.00209,0.00492	A:G,A:G,A:G,A:G,A:G,A:G,A:G,A:G,A:G,A:G,A:G,A:G,A:G,A:G,A:G,A:G,A:G,A:G,A:G,A:G,A:G,A:G,A:G,A:G,A:G,A:G
AT3G52930	AT3G52930	-	AT3G52930.1	658.11674	16	3_19627227,3_19627637,3_19627380,3_19627990,3_19627823,3_19628200,3_19627393,3_19627692,3_19627624,3_19627555,3_19627543,3_19627644,3_19627962,3_19627634,3_19627794,3_19627337	0.0924,0.013,0.00921,0.00607,0.00241,0.00263,0.00194,0.0013,0.00115,0.000801,0.000886,0.000964,0.00108,0.00102,0.000457,0.000748	7.3,5.46,18.4,3.47,4.17,5.55,2.77,3.41,2.54,3.59,3.13,3.15,2.67,2.19,3.6,3.59	4.4e-159,1.35e-90,9.1e-33,1.22e-17,3.88e-12,8.57e-12,1.92e-06,2.9e-06,3.58e-05,5.01e-05,7.58e-05,0.000207,0.000699,0.00428,0.00744,0.0085	T:C,T:C,T:C,T:C,T:C,T:C,T:C,T:C,T:C,T:C,T:C,T:C,T:C,T:C,T:C,T:C
AT4G18730	RPL11B	+	AT4G18730.1	456.6303188	23	4_10302356,4_10303207,4_10302383,4_10303181,4_10303090,4_10302858,4_10302426,4_10302749,4_10303097,4_10302373,4_10303180,4_10302381,4_10303190,4_10303163,4_10303184,4_10302360,4_10303154,4_10302359,4_10303159,4_10302380,4_10302834,4_10303065,4_10303120	0.109,0.185,0.0205,0.036,0.0284,0.0145,0.0121,0.0153,0.00524,0.00658,0.00642,0.00483,0.00411,0.00356,0.00302,0.00475,0.00265,0.00174,0.00147,0.000776,0.00161,0.00192,0.00144	4.86,7.4,6.49,7.8,4.94,7.23,6.96,4.37,15.7,4.56,5.82,3.82,13.3,13.6,14.9,2.06,4.62,4.49,14.3,12.8,2.45,2.1,3.12	2.64e-158,8.4e-110,9.22e-70,7.74e-50,3.35e-49,1.47e-35,3.36e-29,7.93e-28,5.16e-18,2.22e-17,3.45e-14,6.9e-11,5.65e-09,5.2e-07,5.58e-07,2.27e-06,8.78e-06,1.2e-05,0.000581,0.000783,0.000967,0.00233,0.0048	A:G,A:G,A:G,A:G,A:G,A:G,A:G,A:G,A:G,A:G,A:G,A:G,A:G,A:G,A:G,A:G,A:G,A:G,A:G,A:G,A:G,A:G,A:G
AT1G30230	AT1G30230	+	AT1G30230.1,AT1G30230.2	272.3705804,45.0241122	38	1_10640526,1_10640279,1_10639979,1_10640152,1_10640037,1_10639835,1_10639813,1_10640525,1_10640209,1_10640196,1_10639762,1_10639526,1_10640043,1_10639266,1_10640025,1_10640040,1_10639945,1_10640036,1_10640256,1_10639326,1_10639984,1_10640333,1_10639525,1_10640576,1_10639601,1_10640406,1_10640533,1_10639598,1_10640005,1_10639329,1_10640170,1_10639758,1_10640350,1_10640409,1_10639977,1_10639942,1_1…	0.135,0.115,0.0339,0.0517,0.0317,0.0238,0.0137,0.036,0.0217,0.0135,0.0145,0.0135,0.00796,0.0318,0.00828,0.00377,0.00434,0.0034,0.0039,0.00279,0.00229,0.00207,0.00262,0.00254,0.00158,0.00203,0.00263,0.00161,0.00114,0.00192,0.000959,0.00213,0.000905,0.00145,0.00249,0.00208,0.00661,0.000717	7.06,4.07,6.35,7.57,6.5,6.9,7.64,6.66,5.53,7.23,4.93,4.24,5.67,3.79,6.38,5.82,4.54,4.58,4.02,15,16.4,14.8,5.2,15.1,13.3,14.4,4.27,13.9,13.9,14.6,13.7,3.18,13.2,3.38,2.64,3.52,1.46,3.75	8.86e-158,1.49e-116,1.81e-100,8.28e-86,8.17e-64,3.48e-57,5.66e-54,1.4e-44,1.02e-42,4.3e-34,1.08e-29,8.89e-29,5.48e-27,1.8e-26,2.38e-19,1.29e-13,1.84e-11,3.37e-11,1.27e-10,2.17e-10,2.19e-10,7.28e-08,3.95e-07,4.73e-06,7.89e-06,1.28e-05,1.74e-05,1.88e-05,2.16e-05,4.02e-05,0.000122,0.000358,0.000429,0.000503,0.000641,0.00121,0.00337,0.00431	A:G,A:G,A:G,A:G,A:G,A:G,A:G,A:G,A:G,A:G,A:G,A:G,A:G,A:G,A:G,A:G,A:G,A:G,A:G,A:G,A:G,A:G,A:G,A:G,A:G,A:G,A:G,A:G,A:G,A:G,A:G,A:G,A:G,A:G,A:G,A:G,A:G,A:G
AT2G46280	TIF3I1	-	AT2G46280.1,AT2G46280.3	81.8647004,0.340506	18	2_19003663,2_19004408,2_19003657,2_19004974,2_19003616,2_19004694,2_19004476,2_19004021,2_19005050,2_19005000,2_19004634,2_19004282,2_19004992,2_19003664,2_19004086,2_19004426,2_19005345,2_19005035	0.247,0.0565,0.0394,0.00975,0.0175,0.00718,0.00469,0.0097,0.00417,0.00589,0.00434,0.00556,0.00429,0.00414,0.00291,0.00482,0.00353,0.00221	5.95,6.22,7.22,13.6,5.34,5.03,4.66,5,13.8,13.7,13.3,4.48,13.9,12.5,12.8,2.86,3.83,12.9	9.67e-158,2.43e-54,5.13e-38,4.46e-11,8.73e-10,5.42e-08,3.59e-06,4.28e-06,8.05e-06,8.99e-06,6.05e-05,6.73e-05,0.00011,0.000291,0.000479,0.00221,0.00393,0.00556	T:C,T:C,T:C,T:C,T:C,T:C,T:C,T:C,T:C,T:C,T:C,T:C,T:C,T:C,T:C,T:C,T:C,T:C
AT4G31985	RPL39C	+	AT4G31985.1	1680.8437168	9	4_15470365,4_15470373,4_15470346,4_15470372,4_15470409,4_15470384,4_15470128,4_15470329,4_15470151	0.123,0.125,0.0173,0.012,0.00899,0.00635,0.00426,0.00248,0.00122	8.5,7.03,17.2,16.7,3.61,4.8,4.12,4.54,13.5	1.61e-157,1.91e-157,2.16e-46,6.39e-21,8.34e-13,1.17e-12,5.33e-08,3.72e-05,0.00432	A:G,A:G,A:G,A:G,A:G,A:G,A:G,A:G,A:G
AT1G57660	RPL21F	+	AT1G57660.1	607.8712554	15	1_21356131,1_21356122,1_21356129,1_21356330,1_21355729,1_21355771,1_21355694,1_21355580,1_21356311,1_21355660,1_21355736,1_21355584,1_21356125,1_21356124,1_21355772	0.0551,0.0158,0.00829,0.0239,0.00583,0.00642,0.00344,0.00744,0.00357,0.00239,0.00161,0.00276,0.00124,0.00145,0.000586	7.03,5.95,5.51,5.91,5.18,3.54,4.53,4.23,4.03,3.75,4.32,2.8,4.02,2.16,12.9	6.2e-157,1.37e-44,6.87e-33,4.5e-28,9.38e-17,4.98e-12,1.31e-10,2.39e-08,3.72e-07,2.2e-05,0.000246,0.00107,0.00138,0.00221,0.00225	A:G,A:G,A:G,A:G,A:G,A:G,A:G,A:G,A:G,A:G,A:G,A:G,A:G,A:G,A:G
AT5G20290	RPS8A	-	AT5G20290.1	1001.655877	26	5_6851884,5_6851966,5_6851714,5_6851661,5_6851720,5_6851994,5_6851717,5_6852403,5_6852183,5_6852180,5_6851893,5_6851729,5_6853029,5_6852186,5_6851768,5_6852228,5_6851752,5_6852402,5_6852456,5_6851696,5_6851965,5_6851694,5_6852014,5_6851753,5_6851758,5_6851708	0.0639,0.0237,0.0477,0.0161,0.0103,0.00467,0.00691,0.00264,0.00182,0.00128,0.00111,0.00189,0.00437,0.00126,0.000781,0.000387,0.000834,0.000919,0.000761,0.000695,0.000618,0.00165,0.0014,0.000709,0.000749,0.00206	5.11,4.86,5.3,6.34,6.95,4.18,5.22,4.93,2.99,3.86,3.35,2.7,14.3,2.12,4.21,13.8,4.23,3.39,4.2,13.2,14.4,2.53,1.48,2.77,2.56,1.66	3.13e-156,2.56e-116,2.06e-101,1.31e-37,1.62e-26,7.93e-19,1.26e-16,5.45e-15,2.97e-10,2.37e-08,4.88e-06,8.47e-06,1.02e-05,2.33e-05,0.00018,0.000189,0.000235,0.000283,0.000301,0.000996,0.00365,0.00462,0.00559,0.0061,0.00779,0.00979	T:C,T:C,T:C,T:C,T:C,T:C,T:C,T:C,T:C,T:C,T:C,T:C,T:C,T:C,T:C,T:C,T:C,T:C,T:C,T:C,T:C,T:C,T:C,T:C,T:C,T:C
AT1G07920	A3	+	AT1G07920.1	251.328896	9	1_2457149,1_2456678,1_2456931,1_2456894,1_2456799,1_2456985,1_2456769,1_2456946,1_2455860	0.175,0.0168,0.0017,0.0026,0.00123,0.0015,0.0025,0.00194,0.00275	5.47,3.87,13,3.39,14,4.21,3.03,3.33,3.32	5.69e-156,4.33e-21,3.13e-06,3.6e-06,0.000122,0.000226,0.000245,0.000305,0.000309	A:G,A:G,A:G,A:G,A:G,A:G,A:G,A:G,A:G
AT4G13520	SMAP1	+	AT4G13520.1,AT4G13520.2	1040.5424634,NA	5	4_7864558,4_7864559,4_7864646,4_7864649,4_7864631	0.106,0.0875,0.0505,0.00677,0.00543	6.28,6.91,5.82,14,15.7	6.62e-155,3.85e-86,4.19e-69,4e-13,2.12e-11	A:G,A:G,A:G,A:G,A:G
AT5G19510	AT5G19510	-	AT5G19510.1	524.1555922	27	5_6581988,5_6581936,5_6581909,5_6582198,5_6581996,5_6583068,5_6582181,5_6581903,5_6582199,5_6582365,5_6582346,5_6581904,5_6581894,5_6581892,5_6582906,5_6582182,5_6581931,5_6583185,5_6581888,5_6581926,5_6583213,5_6582171,5_6583065,5_6583108,5_6581845,5_6582457,5_6581861	0.141,0.0904,0.0314,0.0467,0.012,0.00815,0.0144,0.0081,0.00958,0.00573,0.00652,0.00559,0.00525,0.00446,0.00242,0.00315,0.005,0.0203,0.00353,0.00344,0.144,0.00166,0.0011,0.00147,0.0024,0.00122,0.00167	4.23,3.52,8.71,5.78,16.9,18,7.49,16.4,5.88,6.55,5.62,4.72,5.19,5.94,5.7,4.87,4.7,14,5.48,4.59,4.78,3.47,4.3,14.2,4.1,2.78,4.16	8.19e-155,6.66e-115,8.66e-95,1.55e-94,6.6e-62,1.82e-41,7.99e-40,4.24e-32,2.1e-26,1.26e-22,1.57e-20,3.52e-18,2.52e-17,2.5e-15,8.48e-14,1.25e-13,4.24e-12,5.71e-12,5.75e-11,4.26e-10,3.89e-07,2.1e-06,7.15e-05,0.000108,0.000189,0.000207,0.000411	T:C,T:C,T:C,T:C,T:C,T:C,T:C,T:C,T:C,T:C,T:C,T:C,T:C,T:C,T:C,T:C,T:C,T:C,T:C,T:C,T:C,T:C,T:C,T:C,T:C,T:C,T:C
AT3G05590	RPL18B	+	AT3G05590.1,AT3G05590.2	920.9801054,0	26	3_1621873,3_1622049,3_1621826,3_1622626,3_1622021,3_1622699,3_1621880,3_1622027,3_1621879,3_1622726,3_1622415,3_1622768,3_1622096,3_1621846,3_1622092,3_1622028,3_1622735,3_1622446,3_1622740,3_1621834,3_1622717,3_1621833,3_1622519,3_1622775,3_1621998,3_1622812	0.174,0.0335,0.0605,0.0363,0.0175,0.0472,0.0144,0.00418,0.00503,0.0129,0.00917,0.0068,0.00275,0.00317,0.00277,0.00443,0.00339,0.00347,0.00372,0.0026,0.00152,0.00131,0.00112,0.00162,0.000492,0.00155	2.87,4.56,3.31,5.94,19.1,5.52,5.25,5.33,5.16,3.37,3.41,5.09,3.96,3.42,5.57,2.29,4.52,3.54,15.7,3.09,4.61,3.56,3.56,4.23,3.6,2.79	4.95e-152,1.5e-101,1.02e-99,1.27e-72,5.03e-70,1.13e-61,3.07e-41,1.45e-30,1.03e-28,7.77e-20,1.12e-17,1.18e-15,3.06e-14,1.33e-12,2.27e-11,3.55e-11,1.87e-10,5.9e-10,7.09e-09,3.04e-07,3.68e-06,4.43e-05,8.62e-05,0.000821,0.00745,0.00866	A:G,A:G,A:G,A:G,A:G,A:G,A:G,A:G,A:G,A:G,A:G,A:G,A:G,A:G,A:G,A:G,A:G,A:G,A:G,A:G,A:G,A:G,A:G,A:G,A:G,A:G
AT3G57290	EIF3E	-	AT3G57290.1	54.3466674	15	3_21196831,3_21196868,3_21196838,3_21196877,3_21197080,3_21196798,3_21197092,3_21196869,3_21196883,3_21198671,3_21197380,3_21196870,3_21196962,3_21198114,3_21197533	0.285,0.248,0.163,0.0657,0.0205,0.0104,0.00964,0.00679,0.00568,0.00784,0.0044,0.00355,0.00365,0.0056,0.00434	4.95,8.43,6.49,17.4,14.2,15.3,15.2,14.1,4.63,4.32,14,13.7,13.8,12.1,3.6	6.78e-147,2.79e-136,3.77e-102,8.11e-39,1.07e-13,1.81e-09,5.86e-08,7.24e-08,9.57e-06,5.93e-05,0.000326,0.000932,0.00129,0.00394,0.00895	T:C,T:C,T:C,T:C,T:C,T:C,T:C,T:C,T:C,T:C,T:C,T:C,T:C,T:C,T:C
AT1G43170	ARP1	+	AT1G43170.1,AT1G43170.4,AT1G43170.2,AT1G43170.3,AT1G43170.5,AT1G43170.6,AT1G43170.7,AT1G43170.8,AT1G43170.9	403.382916,26.3482756,NA	22	1_16268267,1_16268087,1_16268181,1_16267700,1_16268381,1_16267021,1_16267672,1_16267046,1_16268435,1_16267645,1_16268426,1_16267953,1_16266773,1_16268481,1_16268677,1_16267278,1_16267955,1_16267639,1_16267998,1_16268175,1_16268585,1_16267052	0.0614,0.0166,0.00459,0.00369,0.00297,0.00259,0.00241,0.00206,0.00134,0.00207,0.00166,0.0011,0.00546,0.00101,0.00176,0.000397,0.000915,0.00126,0.000968,0.00125,0.000916,0.00119	4.42,4.94,6.21,5.91,3.33,3.6,4.88,4.75,4.39,3.05,2.92,3.5,14,4.34,4.03,13.5,2.64,2.34,2.73,4.19,2.94,2.24	6.97e-145,7.1e-52,4.88e-18,1.12e-17,7.41e-11,4.12e-08,4.03e-07,7.8e-07,3.34e-06,4.66e-06,1.23e-05,0.000121,0.000318,0.000383,0.000964,0.00326,0.00369,0.00438,0.00538,0.006,0.0075,0.00921	A:G,A:G,A:G,A:G,A:G,A:G,A:G,A:G,A:G,A:G,A:G,A:G,A:G,A:G,A:G,A:G,A:G,A:G,A:G,A:G,A:G,A:G
AT2G02510	AT2G02510	+	AT2G02510.1	891.4936074	12	2_674549,2_674529,2_673535,2_673498,2_674525,2_674531,2_673396,2_673523,2_673499,2_673531,2_674583,2_673534	0.205,0.0887,0.0386,0.0183,0.0272,0.0177,0.00663,0.00717,0.00245,0.00358,0.00359,0.00146	18.3,8.01,17.9,16.8,7.23,16,5.06,4.22,14.5,3.31,13.1,3.69	2.67e-144,2.84e-125,2.53e-64,6.65e-38,7.77e-37,2.42e-21,1.49e-08,3.71e-08,2.17e-06,1.91e-05,0.0011,0.00616	A:G,A:G,A:G,A:G,A:G,A:G,A:G,A:G,A:G,A:G,A:G,A:G
AT1G49410	TOM6	-	AT1G49410.1	880.2698238	17	1_18285746,1_18285703,1_18285702,1_18285733,1_18285656,1_18285729,1_18285744,1_18286751,1_18286913,1_18285737,1_18285675,1_18286790,1_18285672,1_18285466,1_18286739,1_18286862,1_18285724	0.16,0.0646,0.0201,0.00782,0.0119,0.00625,0.00498,0.00902,0.00868,0.00376,0.00367,0.00217,0.00376,0.117,0.00288,0.00219,0.00264	7.27,8.32,16.5,16.2,14.8,14.4,4.19,3.43,4.72,15.6,13.7,12.8,13.1,12.6,3.09,13.3,3.86	3.05e-144,9.05e-73,2.66e-28,5e-15,3.48e-11,9.1e-10,2.84e-08,6.33e-07,1.04e-06,9.33e-06,8.76e-05,0.000126,0.000144,0.000286,0.00101,0.00122,0.00219	T:C,T:C,T:C,T:C,T:C,T:C,T:C,T:C,T:C,T:C,T:C,T:C,T:C,T:C,T:C,T:C,T:C
AT5G15090	VDAC3	-	AT5G15090.1,AT5G15090.2	145.1533164,NA	12	5_4889648,5_4889672,5_4889488,5_4889875,5_4889693,5_4890611,5_4889486,5_4890364,5_4889487,5_4889603,5_4889730,5_4889493	0.168,0.0229,0.0408,0.015,0.0144,0.011,0.0124,0.00407,0.0106,0.00574,0.0028,0.00775	8.48,15.9,6.36,5.44,5.34,17,13.5,4.78,13.3,3.7,13.4,12.8	6.63e-144,6.27e-37,2.47e-20,7.36e-20,6.37e-19,1.1e-17,8.72e-07,9.74e-07,8.35e-06,3.88e-05,8.16e-05,8.52e-05	T:C,T:C,T:C,T:C,T:C,T:C,T:C,T:C,T:C,T:C,T:C,T:C
AT4G28060	COX6B-3	-	AT4G28060.1	899.299595	12	4_13944185,4_13944332,4_13944223,4_13944220,4_13944036,4_13944186,4_13943926,4_13944202,4_13943971,4_13944222,4_13944058,4_13943896	0.315,0.224,0.0891,0.0655,0.00485,0.00219,0.00671,0.0015,0.00547,0.00135,0.0027,0.00867	5.27,3.93,7.44,4.7,14.1,4.4,15,14.2,14.3,3.84,3.14,12.8	1.53e-143,1.19e-128,3.35e-88,1.24e-73,3.43e-07,4.1e-05,0.000198,0.000309,0.000542,0.00186,0.00233,0.00801	T:C,T:C,T:C,T:C,T:C,T:C,T:C,T:C,T:C,T:C,T:C,T:C
AT5G11770	AT5G11770	-	AT5G11770.1	273.3938736	21	5_3791311,5_3792530,5_3791276,5_3792578,5_3792529,5_3791336,5_3791153,5_3791327,5_3791152,5_3791176,5_3791260,5_3791265,5_3791322,5_3791227,5_3791342,5_3791343,5_3791203,5_3791140,5_3791215,5_3791027,5_3792593	0.178,0.311,0.0337,0.0286,0.0218,0.0123,0.0148,0.0111,0.011,0.00795,0.00936,0.00566,0.00463,0.00389,0.00345,0.00218,0.00157,0.00171,0.00151,0.0072,0.00146	4.23,2.76,8.49,6.96,6.09,15.5,5.54,6.93,6.64,6.38,5.44,16.2,5.94,5.47,15.5,14.8,13.4,14.5,4.19,14.8,12.4	1.78e-143,1.35e-105,4.25e-82,4.83e-65,1.08e-51,3.28e-40,3.18e-36,1.3e-30,2.3e-25,2.46e-21,1.42e-20,6.22e-16,1.01e-15,4.46e-11,4.22e-09,1.51e-07,1.7e-05,0.000118,0.00018,0.00023,0.00176	T:C,T:C,T:C,T:C,T:C,T:C,T:C,T:C,T:C,T:C,T:C,T:C,T:C,T:C,T:C,T:C,T:C,T:C,T:C,T:C,T:C
AT3G44010	RPS29A	-	AT3G44010.1,AT3G44010.2	2760.140215,NA	8	3_15800146,3_15800171,3_15800172,3_15800027,3_15800028,3_15800175,3_15800142,3_15801133	0.136,0.00583,0.00343,0.0157,0.0119,0.00143,0.000996,0.0025	6.81,5.44,5.75,13.8,4.8,4.44,13.7,2.87	2.87e-143,8.99e-22,4.38e-14,4.06e-08,1.21e-06,2.82e-05,0.000471,0.00063	T:C,T:C,T:C,T:C,T:C,T:C,T:C,T:C
AT5G39600	AT5G39600	-	AT5G39600.1	69.1645902	8	5_15854152,5_15854177,5_15854134,5_15854537,5_15854562,5_15854195,5_15854178,5_15854627	0.378,0.0715,0.0632,0.0318,0.0174,0.0149,0.0132,0.0084	7.77,16.2,16,14.9,14.6,14.5,13.7,13.9	9.38e-142,6.41e-26,8.23e-22,1.68e-12,8.55e-07,1.51e-05,5.42e-05,0.000216	T:C,T:C,T:C,T:C,T:C,T:C,T:C,T:C
AT2G17560	HMGB4	-	AT2G17560.1,AT2G17560.3	209.5998978,6.2295672	4	2_7642478,2_7642468,2_7642659,2_7642321	0.347,0.0481,0.00581,0.0271	6.64,6.86,14.7,4.25	6.26e-140,5.96e-28,1.05e-06,0.000533	T:C,T:C,T:C,T:C
AT4G38680	CSP2	-	AT4G38680.1	358.2175582	7	4_18072254,4_18071990,4_18072603,4_18072213,4_18072038,4_18072638,4_18072643	0.0586,0.0481,0.00975,0.00227,0.00367,0.00138,0.00226	7.1,7.16,6.66,3.82,12.3,4.18,2.54	1e-139,5.3e-36,3.24e-23,5.9e-06,4.91e-05,0.000223,0.00238	T:C,T:C,T:C,T:C,T:C,T:C,T:C
AT1G04270	RPS15A	-	AT1G04270.1,AT1G04270.2	913.0497144,0.1607712	24	1_1141982,1_1141834,1_1142748,1_1142614,1_1141979,1_1142815,1_1141919,1_1142045,1_1141902,1_1142605,1_1142798,1_1141937,1_1141967,1_1142068,1_1142025,1_1142811,1_1141736,1_1142722,1_1141922,1_1142749,1_1142795,1_1141835,1_1142027,1_1141856	0.11,0.0538,0.00797,0.00586,0.00508,0.00345,0.00549,0.00807,0.00591,0.00447,0.00254,0.00424,0.00215,0.00134,0.00175,0.000748,0.00384,0.000887,0.000894,0.000837,0.000724,0.00113,0.000838,0.00114	4.93,8.49,6.77,5.03,15.7,15.3,6.33,6.21,6.04,3,4.55,3.04,4.89,3.87,3.73,14.7,13.2,3.59,13.6,3.42,14.6,13.9,3.24,3.9	1.92e-139,6.76e-75,2.24e-29,6.03e-24,3.66e-22,2.07e-21,1.86e-19,7.59e-18,6.78e-16,4e-13,9.06e-10,1.85e-09,8.01e-07,1.51e-05,4.3e-05,7.81e-05,0.000153,0.000158,0.00016,0.000261,0.000375,0.000575,0.00101,0.00221	T:C,T:C,T:C,T:C,T:C,T:C,T:C,T:C,T:C,T:C,T:C,T:C,T:C,T:C,T:C,T:C,T:C,T:C,T:C,T:C,T:C,T:C,T:C,T:C
AT4G17390	RPL15B	-	AT4G17390.1	750.7415274	16	4_9714517,4_9714414,4_9714770,4_9714433,4_9714444,4_9714513,4_9714516,4_9714441,4_9714639,4_9714927,4_9715289,4_9715434,4_9715406,4_9715281,4_9714842,4_9714878	0.034,0.0992,0.00377,0.00698,0.00561,0.00471,0.00294,0.00334,0.00168,0.00137,0.000412,0.00171,0.000798,0.000633,0.000936,0.000601	8.06,9.11,4.73,4.55,16.2,3.65,4.58,15.5,2.75,1.99,13.9,13.9,13.3,2.31,2.21,2.91	9.7e-139,6.59e-109,2.09e-19,1.2e-15,4.77e-14,3.41e-12,8.58e-11,3.06e-07,2.78e-05,0.000199,0.00178,0.00182,0.00189,0.00369,0.00393,0.00661	T:C,T:C,T:C,T:C,T:C,T:C,T:C,T:C,T:C,T:C,T:C,T:C,T:C,T:C,T:C,T:C
AT3G07910	AT3G07910	-	AT3G07910.1	384.5436098	3	3_2523441,3_2523396,3_2523376	0.265,0.0246,0.022	5.09,16.5,5.54	2.05e-138,1.42e-20,1.14e-10	T:C,T:C,T:C
AT2G42310	AT2G42310	+	AT2G42310.1	665.3924274	10	2_17625649,2_17625323,2_17625325,2_17625292,2_17625703,2_17625595,2_17625360,2_17625538,2_17625280,2_17625264	0.171,0.0455,0.0119,0.0177,0.0278,0.00543,0.00287,0.00325,0.0028,0.00267	6.39,6.31,17.3,4.54,16.1,5.21,5.06,4.96,13.3,12.6	2.84e-138,2.53e-101,1.5e-27,1.94e-25,7.6e-21,4.73e-09,2.37e-08,2.21e-07,1.54e-06,2.17e-05	A:G,A:G,A:G,A:G,A:G,A:G,A:G,A:G,A:G,A:G
AT1G74060	RPL6B	-	AT1G74060.1	278.7896408	25	1_27850034,1_27850004,1_27849986,1_27850163,1_27850147,1_27850105,1_27851054,1_27850159,1_27850103,1_27849987,1_27851084,1_27850451,1_27850098,1_27850169,1_27850148,1_27851236,1_27850731,1_27850387,1_27851187,1_27850421,1_27850066,1_27850703,1_27851208,1_27850501,1_27851059	0.13,0.0574,0.0469,0.0175,0.0135,0.0108,0.00328,0.00372,0.00369,0.00574,0.00229,0.00164,0.00223,0.00223,0.00257,0.00169,0.00239,0.00155,0.00138,0.00189,0.00169,0.00117,0.00112,0.00101,0.000959	7.73,8.39,7.6,7.16,5.89,16.7,13.5,5.19,5.15,13.9,14.4,4.41,14.5,3.54,3.51,4.16,2.69,4.14,4,14.2,13.2,13.5,3.73,3.63,13.6	3.54e-138,6.75e-80,7.5e-43,7.69e-34,5.09e-29,7.66e-24,1.11e-11,6.74e-09,1.72e-08,2.37e-07,5.43e-07,3.33e-05,9.35e-05,0.00011,0.00016,0.000233,0.000353,0.00038,0.000919,0.00102,0.0012,0.00137,0.00368,0.00512,0.00524	T:C,T:C,T:C,T:C,T:C,T:C,T:C,T:C,T:C,T:C,T:C,T:C,T:C,T:C,T:C,T:C,T:C,T:C,T:C,T:C,T:C,T:C,T:C,T:C,T:C
AT2G20820	AT2G20820	+	AT2G20820.1,AT2G20820.2	913.2529194,134.4063962	12	2_8965049,2_8965050,2_8965048,2_8964843,2_8965052,2_8964869,2_8964532,2_8965051,2_8965047,2_8965202,2_8964845,2_8965163	0.144,0.0533,0.0325,0.00635,0.0193,0.00411,0.006,0.00606,0.00372,0.00491,0.00253,0.00138	5.21,8.54,5.52,17.8,2.89,15.8,4.11,4.96,15.2,15.6,4.37,3.12	4.23e-138,1.48e-80,2.4e-52,1.83e-28,2.48e-21,1.79e-17,2.99e-14,7.71e-14,9.58e-14,4.91e-11,2.17e-09,0.00264	A:G,A:G,A:G,A:G,A:G,A:G,A:G,A:G,A:G,A:G,A:G,A:G
AT3G03920	AT3G03920	-	AT3G03920.1	220.771579	20	3_1009679,3_1009725,3_1009131,3_1009179,3_1009135,3_1009224,3_1009239,3_1010214,3_1009278,3_1009149,3_1009687,3_1009528,3_1009248,3_1009575,3_1009483,3_1009249,3_1009258,3_1009562,3_1009710,3_1009816	0.208,0.0403,0.0593,0.0403,0.0268,0.0147,0.0178,0.00874,0.00917,0.0148,0.00265,0.00203,0.00374,0.00127,0.00237,0.00223,0.00302,0.000971,0.000973,0.0017	2.94,6.88,17.8,5.23,6.54,6.33,17.9,5.29,6.15,4.54,5.21,14.7,4.62,13.6,4.22,14.5,2.91,13.1,3.65,2.25	6.6e-138,6.44e-120,1.68e-55,7.09e-36,2.15e-24,4.19e-21,4.43e-20,1.75e-19,2.08e-18,2.39e-10,1.23e-09,1.1e-06,6.86e-06,4.29e-05,0.000212,0.000435,0.000655,0.00125,0.00546,0.0066	T:C,T:C,T:C,T:C,T:C,T:C,T:C,T:C,T:C,T:C,T:C,T:C,T:C,T:C,T:C,T:C,T:C,T:C,T:C,T:C
AT2G39460	RPL23AA	+	AT2G39460.1,AT2G39460.2	678.4730444,NA	12	2_16475984,2_16475904,2_16475987,2_16475608,2_16475626,2_16475973,2_16475668,2_16475981,2_16475977,2_16476000,2_16475674,2_16475954	0.101,0.0868,0.0672,0.0293,0.0226,0.024,0.00469,0.00851,0.00513,0.00502,0.00128,0.00205	8.17,7.22,8.63,6.29,4.21,15.9,4.48,15.4,14.2,14.6,3.5,12.9	6.42e-137,1.07e-103,4.56e-100,3.14e-75,5.2e-51,4.27e-40,1.26e-14,2.01e-13,1.41e-08,2.12e-07,0.000245,0.00119	A:G,A:G,A:G,A:G,A:G,A:G,A:G,A:G,A:G,A:G,A:G,A:G
AT1G11650	RBP45B	+	AT1G11650.2,AT1G11650.1	83.6054996,0.0264896	9	1_3917952,1_3917865,1_3917838,1_3917899,1_3917920,1_3914975,1_3917965,1_3917922,1_3917916	0.148,0.0448,0.00735,0.0111,0.00411,0.00728,0.00466,0.0032,0.00242	8.32,6.88,14.2,4.7,14.3,3.13,14.1,4.15,13.6	1.96e-136,8.99e-56,3.27e-17,4.72e-12,6.12e-06,3.44e-05,9.52e-05,0.000468,0.000473	A:G,A:G,A:G,A:G,A:G,A:G,A:G,A:G,A:G
AT1G17880	BTF3	-	AT1G17880.1	278.721337	14	1_6153155,1_6152605,1_6152564,1_6152719,1_6153403,1_6152732,1_6153156,1_6152599,1_6152673,1_6153263,1_6153394,1_6152566,1_6152565,1_6153122	0.111,0.0135,0.00573,0.00319,0.00317,0.00345,0.00128,0.00232,0.00183,0.00156,0.00183,0.00284,0.00266,0.00137	4.6,4.76,4.84,15,13.8,4.72,14,12.5,14.6,3.93,3.9,3.9,3.78,3.84	3.87e-136,1.83e-11,6.78e-07,1.1e-06,1.55e-06,2.93e-06,0.000236,0.000583,0.00119,0.00119,0.0014,0.00202,0.0039,0.00567	T:C,T:C,T:C,T:C,T:C,T:C,T:C,T:C,T:C,T:C,T:C,T:C,T:C,T:C
AT5G17920	MS1	+	AT5G17920.1,AT5G17920.2	292.9427404,NA	10	5_5939085,5_5939344,5_5939047,5_5939043,5_5938627,5_5938297,5_5939044,5_5936284,5_5939071,5_5939337	0.0846,0.0375,0.0357,0.00269,0.00494,0.00286,0.00136,0.00641,0.00111,0.00216	3.25,8.41,5.83,14.8,1.78,2.72,13.8,1.45,4.34,3.13	4.83e-136,4.53e-85,5.89e-57,9.2e-13,3.41e-09,9.97e-08,1.2e-06,2.73e-05,0.000105,0.00169	A:G,A:G,A:G,A:G,A:G,A:G,A:G,A:G,A:G,A:G
AT5G58710	CYP20-1	+	AT5G58710.1	174.6807702	16	5_23719508,5_23719146,5_23719020,5_23719545,5_23719437,5_23717893,5_23718481,5_23719572,5_23717888,5_23719121,5_23719169,5_23719390,5_23718881,5_23718898,5_23719117,5_23719142	0.161,0.0141,0.0152,0.0262,0.023,0.0109,0.0101,0.0177,0.00898,0.00326,0.00299,0.00537,0.00471,0.00216,0.00129,0.00115	8.16,16.9,5.14,4.97,16.3,5.62,16.4,5.46,14.8,5.01,14.8,3.9,4.66,12.9,14,12.8	1.69e-135,8.73e-18,1.88e-16,5.01e-14,6.43e-14,2.32e-13,8.21e-12,5.69e-11,3.3e-10,3.72e-08,1.73e-06,2.39e-06,1.36e-05,2.54e-05,0.00058,0.00454	A:G,A:G,A:G,A:G,A:G,A:G,A:G,A:G,A:G,A:G,A:G,A:G,A:G,A:G,A:G,A:G
AT4G16720	RPL15A	-	AT4G16720.1	759.9720292	20	4_9401012,4_9401081,4_9400206,4_9400382,4_9400565,4_9401079,4_9400642,4_9400665,4_9400340,4_9400262,4_9400352,4_9400391,4_9400635,4_9401316,4_9401094,4_9400568,4_9401075,4_9401009,4_9400609,4_9401030	0.0653,0.0134,0.0226,0.103,0.00888,0.00547,0.00254,0.00272,0.00313,0.00238,0.0025,0.00122,0.000695,0.00312,0.00112,0.000502,0.000474,0.00103,0.00102,0.000573	3.68,5.16,4.23,4.75,5.16,5.24,4.87,3.7,4.75,4.35,3.44,2.94,13,13.4,2.91,12.6,13.5,2.55,2.66,2.52	2.65e-133,2.26e-66,2.06e-41,2.76e-36,6.38e-32,4.1e-19,9.16e-14,2.1e-12,2.92e-12,1.77e-08,2.47e-07,4.58e-05,4.8e-05,0.000116,0.000271,0.000926,0.00339,0.00393,0.00534,0.00678	T:C,T:C,T:C,T:C,T:C,T:C,T:C,T:C,T:C,T:C,T:C,T:C,T:C,T:C,T:C,T:C,T:C,T:C,T:C,T:C
AT5G04800	RPS17D	+	AT5G04800.1,AT5G04800.2,AT5G04800.3,AT5G04800.4	749.0135858,NA	15	5_1389547,5_1389347,5_1389638,5_1389666,5_1389712,5_1389732,5_1389326,5_1389543,5_1389676,5_1389713,5_1389316,5_1389601,5_1389249,5_1388511,5_1389315	0.15,0.0301,0.0336,0.0473,0.0373,0.0268,0.00233,0.00525,0.00569,0.00767,0.00106,0.00261,0.0011,0.0191,0.00141	5.79,3.87,6.48,7.6,17.1,16.7,5.22,3.55,14.4,12.8,13.3,13.2,4.27,13.1,2.88	2.9e-133,7.54e-59,2.28e-45,2.98e-45,2.54e-33,8.23e-20,1.06e-09,5.81e-09,4.43e-07,8.89e-07,8.08e-05,9.6e-05,0.000111,0.000344,0.000522	A:G,A:G,A:G,A:G,A:G,A:G,A:G,A:G,A:G,A:G,A:G,A:G,A:G,A:G,A:G
AT1G72020	AT1G72020	-	AT1G72020.1	1555.3487422	13	1_27109424,1_27109417,1_27109736,1_27109405,1_27109454,1_27109398,1_27109522,1_27109399,1_27109468,1_27110294,1_27109411,1_27109418,1_27109521	0.165,0.0695,0.0234,0.0233,0.00945,0.0126,0.00543,0.00558,0.00401,0.0022,0.00365,0.00325,0.00294	7.2,7.15,4.65,15.8,6.52,6.48,5.71,14.3,15.7,5.17,4.77,15.5,4.29	4.96e-133,3.99e-64,6.03e-44,9.12e-35,1.07e-23,6.23e-23,2.25e-12,1.88e-11,1.22e-10,3.89e-09,1.55e-06,9.84e-06,0.000695	T:C,T:C,T:C,T:C,T:C,T:C,T:C,T:C,T:C,T:C,T:C,T:C,T:C
AT5G17770	CBR1	-	AT5G17770.1	150.7556428	13	5_5865440,5_5865428,5_5865390,5_5866130,5_5866088,5_5865391,5_5864571,5_5865755,5_5864843,5_5864604,5_5864535,5_5864550,5_5865649	0.0814,0.0657,0.0258,0.0324,0.00513,0.0089,0.00429,0.00665,0.00244,0.00302,0.00242,0.0022,0.0031	5.04,5.5,6.62,3.95,15.5,3.67,4.13,4.81,12.6,4.57,12.6,4.11,2.5	3.19e-132,6.4e-86,3.75e-51,2.59e-50,3.59e-11,8.87e-11,1.29e-07,3.68e-06,7.54e-06,1.37e-05,0.000109,0.000536,0.00835	T:C,T:C,T:C,T:C,T:C,T:C,T:C,T:C,T:C,T:C,T:C,T:C,T:C
AT3G59920	GDI2	+	AT3G59920.1	71.285229	9	3_22138039,3_22138250,3_22137719,3_22138007,3_22138005,3_22137317,3_22137895,3_22135652,3_22138217	0.12,0.0401,0.00888,0.00614,0.0045,0.00335,0.00322,0.00281,0.00368	9.17,5.46,5.09,3.93,13.5,4.44,4.05,13.1,3.88	2.71e-131,9.22e-20,4.37e-08,2.73e-06,4.77e-06,2.37e-05,0.000835,0.00154,0.0028	A:G,A:G,A:G,A:G,A:G,A:G,A:G,A:G,A:G
AT5G49210	AT5G49210	+	AT5G49210.1,AT5G49210.3	47.3439752,0	3	5_19951470,5_19951469,5_19951585	0.502,0.0331,0.126	4.27,15,16.3	4.89e-131,8.99e-14,1.48e-09	A:G,A:G,A:G
AT3G13580	RPL7D	+	AT3G13580.1,AT3G13580.2,AT3G13580.3,AT3G13580.4,AT3G13580.5,AT3G13580.6,AT3G13580.7,AT3G13580.8,AT3G13580.9	101.5973936,NA	19	3_4433891,3_4433893,3_4433855,3_4433870,3_4433847,3_4435166,3_4433972,3_4433895,3_4433858,3_4435157,3_4435205,3_4433897,3_4435140,3_4435192,3_4434325,3_4433894,3_4435202,3_4433874,3_4433816	0.183,0.156,0.127,0.0777,0.0564,0.0253,0.0267,0.0234,0.0171,0.0129,0.0261,0.00641,0.0201,0.0174,0.0074,0.0043,0.00968,0.00537,0.00302	6.41,18.5,8.23,17.4,6.35,16.6,6.32,15.5,15.8,13.6,5.43,5.31,5.46,14.6,14.1,4.63,13.1,14.6,12.7	2.42e-129,2.25e-115,9.18e-67,1.91e-59,5.19e-41,2.98e-19,5.28e-18,1.05e-14,1.62e-13,7.81e-11,1.15e-10,1.25e-10,1.81e-09,2.14e-08,1.36e-07,3.54e-06,8.39e-05,0.000734,0.00246	A:G,A:G,A:G,A:G,A:G,A:G,A:G,A:G,A:G,A:G,A:G,A:G,A:G,A:G,A:G,A:G,A:G,A:G,A:G
AT3G55750	RPL35AD	+	AT3G55750.1	930.2037552	13	3_20699520,3_20699518,3_20699374,3_20699359,3_20699405,3_20699851,3_20699977,3_20699920,3_20700015,3_20699873,3_20699542,3_20699843,3_20699854	0.0541,0.117,0.356,0.0296,0.0133,0.00899,0.031,0.0101,0.068,0.00486,0.00287,0.00251,0.00335	9.12,8.12,3.09,6.83,6.2,6.04,14.8,5.31,14.5,13.5,14.8,13.6,15	1.53e-128,5.38e-120,1.47e-105,4.87e-88,1.66e-19,2.5e-16,7.65e-12,6.76e-10,1.23e-09,8.08e-07,9.9e-07,8.35e-06,1.18e-05	A:G,A:G,A:G,A:G,A:G,A:G,A:G,A:G,A:G,A:G,A:G,A:G,A:G
AT2G43460	RPL38B	-	AT2G43460.1	3640.1195778	18	2_18046779,2_18046284,2_18046858,2_18046273,2_18046775,2_18046743,2_18046773,2_18046278,2_18046759,2_18046112,2_18046124,2_18046274,2_18046820,2_18046125,2_18046774,2_18046765,2_18046113,2_18046832	0.08,0.0463,0.0492,0.031,0.00893,0.014,0.0111,0.0065,0.00438,0.0206,0.0123,0.00137,0.00136,0.00656,0.000905,0.000872,0.00535,0.00169	5.74,7.89,4.95,6.57,5.72,6.05,5.34,6.13,5.01,5.68,13.5,4.42,2,4.04,3.12,3.06,3.75,2.36	4.71e-128,1.61e-111,5.82e-81,1.18e-70,1.02e-38,2.48e-32,4.58e-29,1.56e-15,3.39e-14,1.47e-12,9.65e-09,3.72e-05,0.000586,0.000815,0.000998,0.00296,0.00505,0.0069	T:C,T:C,T:C,T:C,T:C,T:C,T:C,T:C,T:C,T:C,T:C,T:C,T:C,T:C,T:C,T:C,T:C,T:C
AT5G23740	RPS11C	-	AT5G23740.1	415.3325502	29	5_8008692,5_8009198,5_8008736,5_8008240,5_8008273,5_8008676,5_8009209,5_8008455,5_8008183,5_8008447,5_8008251,5_8009103,5_8008459,5_8009071,5_8008241,5_8008270,5_8009219,5_8009102,5_8008747,5_8008262,5_8008271,5_8008496,5_8008669,5_8009073,5_8009084,5_8008272,5_8008432,5_8009090,5_8008505	0.127,0.0674,0.0241,0.0575,0.0186,0.0059,0.0101,0.0108,0.0214,0.00851,0.0148,0.00795,0.00566,0.00426,0.00842,0.011,0.00454,0.00521,0.00226,0.00409,0.00629,0.00261,0.00215,0.00137,0.00144,0.00256,0.00177,0.00147,0.00149	4.15,3.27,5.33,17.8,15.5,5.49,6.37,5.45,15.7,6.16,17.2,3.65,4.78,4.75,14.9,3.82,5.3,4.02,4.26,13.3,5.15,14.7,4.76,12.7,4.48,4.38,13.5,4.31,3.22	1.9e-127,4.46e-69,1.79e-57,6.92e-56,2.23e-41,3.6e-22,1.01e-19,1.07e-18,1.17e-18,9.24e-17,1.3e-15,2.02e-15,5.28e-13,8.26e-13,1.03e-10,6.16e-10,3.46e-09,7.74e-09,1.93e-08,5.57e-08,6.29e-08,3.46e-07,1.98e-06,5.93e-06,1.9e-05,6.79e-05,0.000103,0.000112,0.00109	T:C,T:C,T:C,T:C,T:C,T:C,T:C,T:C,T:C,T:C,T:C,T:C,T:C,T:C,T:C,T:C,T:C,T:C,T:C,T:C,T:C,T:C,T:C,T:C,T:C,T:C,T:C,T:C,T:C
AT5G64350	FKBP12	-	AT5G64350.1	1794.8391768	21	5_25735287,5_25735912,5_25735487,5_25734790,5_25735096,5_25734792,5_25735956,5_25734779,5_25734791,5_25734781,5_25735974,5_25734755,5_25735253,5_25735229,5_25735270,5_25734773,5_25734768,5_25734854,5_25735973,5_25735228,5_25735283	0.083,0.00763,0.00613,0.012,0.00793,0.00494,0.00276,0.00351,0.00379,0.00471,0.00317,0.00629,0.00212,0.0026,0.00127,0.00297,0.00211,0.00086,0.00104,0.000828,0.000613	4.67,7.26,17.5,16.9,4.42,4.83,15.1,15.1,5.34,15.9,3.61,5.18,2.69,4.96,15.4,4.78,13.4,12.5,13.6,3.03,3.04	3.03e-127,1.03e-38,8.29e-30,6.93e-27,1.02e-19,1.68e-13,1.95e-11,9.08e-11,7.04e-10,3.91e-09,4.03e-08,8.44e-08,1.3e-07,2.65e-07,2.74e-07,7.65e-06,6.2e-05,0.000309,0.000598,0.00204,0.00881	T:C,T:C,T:C,T:C,T:C,T:C,T:C,T:C,T:C,T:C,T:C,T:C,T:C,T:C,T:C,T:C,T:C,T:C,T:C,T:C,T:C
AT2G37340	RS2Z33	-	AT2G37340.1,AT2G37340.2,AT2G37340.3	50.2540232,0.8621978,0	31	2_15670623,2_15670558,2_15670512,2_15671098,2_15670614,2_15670415,2_15671054,2_15670629,2_15672303,2_15670858,2_15670601,2_15670870,2_15670948,2_15671033,2_15671580,2_15672235,2_15671099,2_15670876,2_15670894,2_15670708,2_15670882,2_15671178,2_15671053,2_15672633,2_15670444,2_15670655,2_15670452,2_15672627,2_15671101,2_15670627,2_15670569	0.366,0.395,0.387,0.119,0.125,0.0443,0.0693,0.0257,0.0373,0.021,0.0241,0.018,0.0348,0.0376,0.0144,0.0173,0.0118,0.00844,0.00752,0.00555,0.00978,0.00778,0.00901,0.0142,0.00794,0.00338,0.00576,0.00954,0.00421,0.00398,0.00434	5.25,6.44,5.96,7.04,7.03,15.9,16.5,15.9,14.8,6.24,6.18,6,5.99,14.9,15.5,4.48,13.3,14.3,14.6,14.3,4.71,12.6,12.9,13.4,4.13,13.5,13,12.8,13.8,3.78,3.6	6.5e-127,1.55e-117,1.37e-98,1.51e-66,2.49e-60,1.12e-24,7.76e-24,3.26e-23,1.72e-20,2.26e-19,1.77e-17,1.69e-16,2.19e-15,1.02e-13,2.05e-11,4.39e-11,5.97e-09,3.41e-08,3.9e-07,4.1e-06,4.98e-06,2.55e-05,3.5e-05,3.61e-05,0.000506,0.00117,0.00134,0.00144,0.00312,0.00329,0.00879	T:C,T:C,T:C,T:C,T:C,T:C,T:C,T:C,T:C,T:C,T:C,T:C,T:C,T:C,T:C,T:C,T:C,T:C,T:C,T:C,T:C,T:C,T:C,T:C,T:C,T:C,T:C,T:C,T:C,T:C,T:C
AT1G26880	RPL34A	-	AT1G26880.1,AT1G26880.2	529.709584,1.3786816	5	1_9315599,1_9315592,1_9315608,1_9316432,1_9316644	0.286,0.205,0.0106,0.00153,0.00226	8.27,7.74,15.3,4.42,12.9	7.08e-127,2.37e-93,3.8e-17,2.93e-05,0.000407	T:C,T:C,T:C,T:C,T:C
AT1G18540	RPL6A	-	AT1G18540.1	367.8256348	2	1_6377449,1_6377566	0.117,0.00414	5.28,5.6	1.25e-126,3.65e-11	T:C,T:C
AT1G56280	ATDI19	-	AT1G56280.1,AT1G56280.2	616.5175136,0.0368894	23	1_21073182,1_21073194,1_21073475,1_21073671,1_21073158,1_21073900,1_21073367,1_21073048,1_21074077,1_21073670,1_21073749,1_21073904,1_21073789,1_21073191,1_21073933,1_21074118,1_21074174,1_21074079,1_21074160,1_21073924,1_21073722,1_21073951,1_21073734	0.161,0.066,0.0367,0.025,0.0119,0.00835,0.0113,0.0305,0.00851,0.00549,0.00331,0.0034,0.00454,0.00442,0.0015,0.00219,0.00291,0.00126,0.0016,0.00114,0.00139,0.000666,0.000841	4.36,3.54,4.32,7.11,6.1,6.99,3.64,7.11,5.01,5.24,15.1,4.18,3.68,3.15,4.83,3.99,3.22,4.57,14.5,13,4.52,13.2,2.92	2.85e-126,8.23e-60,3.77e-54,4.39e-36,3.15e-33,2.27e-31,6.48e-31,3.18e-30,8.57e-21,2.07e-18,1.54e-16,7.67e-12,9.97e-10,7.65e-07,8.81e-07,9.21e-07,9.99e-07,6.48e-06,7.98e-06,1.06e-05,0.000758,0.0035,0.00702	T:C,T:C,T:C,T:C,T:C,T:C,T:C,T:C,T:C,T:C,T:C,T:C,T:C,T:C,T:C,T:C,T:C,T:C,T:C,T:C,T:C,T:C,T:C
AT5G59613	AT5G59613	-	AT5G59613.2,AT5G59613.1	4385.396435,12.9978482	13	5_24016177,5_24015658,5_24016508,5_24015619,5_24016509,5_24015704,5_24016511,5_24015690,5_24016510,5_24016204,5_24015610,5_24015606,5_24015629	0.141,0.565,0.0658,0.0682,0.0113,0.00654,0.0142,0.00586,0.00804,0.00368,0.00501,0.00197,0.000788	4.77,3,5.84,7.45,5.6,5.95,5.85,4.96,3.88,3.11,3.74,14.2,12.9	8.08e-126,6.34e-118,1.19e-86,3.26e-80,4.38e-38,1.81e-30,2.7e-27,5.51e-22,1.15e-16,2.77e-08,4.53e-08,5.17e-06,0.00152	T:C,T:C,T:C,T:C,T:C,T:C,T:C,T:C,T:C,T:C,T:C,T:C,T:C
AT5G02450	RPL36C	+	AT5G02450.1	1472.1532764	18	5_533518,5_534387,5_534390,5_534082,5_534384,5_534079,5_534083,5_534451,5_533500,5_534202,5_534121,5_534386,5_534069,5_534429,5_534232,5_533563,5_533194,5_534450	0.0727,0.0458,0.0341,0.00913,0.0119,0.0141,0.0133,0.00786,0.00729,0.00171,0.00121,0.00186,0.00171,0.00194,0.00139,0.00163,0.00243,0.00358	6.14,7.28,6.1,5.56,6.81,5.85,1.92,5.99,5.24,4.51,3.64,14.2,2.57,14.3,4.09,2.64,3.77,2.22	2.13e-124,1.34e-72,6.84e-50,9.75e-49,2.91e-29,3.18e-28,1.43e-14,1.38e-13,9.44e-10,1.79e-05,1.82e-05,2.97e-05,0.000207,0.000295,0.00062,0.00265,0.00295,0.00437	A:G,A:G,A:G,A:G,A:G,A:G,A:G,A:G,A:G,A:G,A:G,A:G,A:G,A:G,A:G,A:G,A:G,A:G
AT4G02450	AT4G02450	-	AT4G02450.1,AT4G02450.2	172.187677,0.3146504	15	4_1075175,4_1073996,4_1075123,4_1074033,4_1073960,4_1074057,4_1073974,4_1073944,4_1074098,4_1074087,4_1074038,4_1074017,4_1075081,4_1075796,4_1073961	0.105,0.0471,0.0229,0.00827,0.0085,0.00403,0.00506,0.00463,0.00233,0.00262,0.00183,0.00104,0.00232,0.00277,0.00235	4.75,6.36,5.59,5.56,16.8,15.6,5.35,13.4,14.8,3.77,4.42,13.3,14.3,13.6,2.98	9.72e-122,9.43e-108,8.34e-38,1.87e-24,2.98e-15,1.9e-13,1.89e-10,4.46e-08,7.73e-07,1.09e-05,2.93e-05,0.0013,0.00143,0.00165,0.00491	T:C,T:C,T:C,T:C,T:C,T:C,T:C,T:C,T:C,T:C,T:C,T:C,T:C,T:C,T:C
AT5G20160	AT5G20160	-	AT5G20160.1,AT5G20160.2,AT5G20160.3	284.1148388,0.0771636,0.1886384	11	5_6803985,5_6804272,5_6803982,5_6804895,5_6804941,5_6803984,5_6804062,5_6804088,5_6803983,5_6804248,5_6804290	0.188,0.256,0.1,0.0207,0.00421,0.0116,0.00519,0.00504,0.00843,0.00279,0.00246	7.96,3.07,17.2,5.54,15.6,13.4,14.3,14.2,13,12.8,13.6	2.55e-119,3.06e-68,1.23e-36,1.44e-33,1.32e-07,4.48e-07,1.02e-06,4.75e-06,4.63e-05,9.47e-05,0.000485	T:C,T:C,T:C,T:C,T:C,T:C,T:C,T:C,T:C,T:C,T:C
AT2G41840	RPS2C	-	AT2G41840.1	553.4670872	41	2_17460819,2_17460122,2_17461425,2_17460795,2_17460785,2_17461354,2_17460782,2_17461378,2_17460105,2_17461223,2_17461076,2_17460091,2_17460156,2_17460155,2_17461068,2_17460972,2_17460065,2_17461249,2_17460028,2_17460773,2_17460725,2_17460066,2_17461056,2_17461050,2_17460925,2_17461246,2_17460902,2_17460095,2_17460869,2_17459835,2_17460084,2_17460942,2_17460772,2_17459836,2_17461058,2_17460158,2_1…	0.034,0.0744,0.0952,0.0192,0.00943,0.0345,0.0127,0.0279,0.00668,0.00966,0.00782,0.00625,0.00298,0.00192,0.00273,0.00261,0.0044,0.00257,0.00321,0.00199,0.00333,0.00171,0.00231,0.00199,0.00205,0.00135,0.00149,0.001,0.00108,0.0102,0.000915,0.00211,0.00102,0.00945,0.000878,0.000694,0.00133,0.000706,0.00164,0.0012,0.000666	5.62,3.78,4.8,4.65,4.49,4.17,5.44,7.36,5.96,3.76,4.64,3.76,3.68,5.62,4.52,4.5,3.75,3.5,5.38,5.34,3.59,14.1,3.76,3.22,4.1,3.45,4.54,13.3,12.4,13.2,13.6,3.59,3.1,13.1,4.25,4.22,1.91,12.8,2.02,4.01,3.08	5.37e-118,4.86e-100,9.69e-90,1.28e-53,9.8e-47,1.74e-44,6.11e-43,1.97e-34,1.76e-30,4.15e-29,5.4e-29,1.12e-20,3.4e-15,4.53e-12,4.87e-11,6.78e-11,8.45e-11,1.68e-10,4.52e-10,6.81e-10,9.36e-09,1.95e-08,3.8e-08,1.09e-07,1.24e-07,1.18e-06,1.49e-05,1.58e-05,2.17e-05,5.03e-05,5.29e-05,9.34e-05,9.65e-05,0.000101,0.000147,0.000192,0.000306,0.000419,0.00127,0.00139,0.00228	T:C,T:C,T:C,T:C,T:C,T:C,T:C,T:C,T:C,T:C,T:C,T:C,T:C,T:C,T:C,T:C,T:C,T:C,T:C,T:C,T:C,T:C,T:C,T:C,T:C,T:C,T:C,T:C,T:C,T:C,T:C,T:C,T:C,T:C,T:C,T:C,T:C,T:C,T:C,T:C,T:C
AT3G11510	RPS14B	-	AT3G11510.1	552.0361196	20	3_3624202,3_3623681,3_3624159,3_3623991,3_3624542,3_3623686,3_3623938,3_3624175,3_3623752,3_3624543,3_3623995,3_3623934,3_3623728,3_3624208,3_3623992,3_3623996,3_3624133,3_3624140,3_3623632,3_3623959	0.24,0.1,0.079,0.0486,0.0647,0.018,0.00818,0.00657,0.00846,0.00941,0.00512,0.00289,0.00614,0.00373,0.00295,0.00283,0.00205,0.00103,0.00322,0.00253	2.64,7.28,5.26,5.9,4.02,6.68,6.19,5.15,14.8,16.4,5.37,5.33,4.15,3.13,14.8,14.8,4.42,13.3,13,2.68	1.18e-117,1.49e-105,3.13e-90,7.44e-89,5.02e-46,3.83e-24,4.09e-17,3.96e-16,6.62e-15,5.97e-12,5.55e-10,6.24e-10,2.86e-08,3.72e-08,1.03e-07,1.34e-07,5.47e-06,0.000233,0.000314,0.000695	T:C,T:C,T:C,T:C,T:C,T:C,T:C,T:C,T:C,T:C,T:C,T:C,T:C,T:C,T:C,T:C,T:C,T:C,T:C,T:C
AT1G73230	AT1G73230	-	AT1G73230.1	379.4245086	23	1_27540343,1_27540795,1_27540666,1_27541097,1_27540293,1_27540495,1_27540489,1_27540404,1_27540342,1_27540294,1_27540533,1_27541352,1_27540611,1_27541098,1_27541209,1_27541063,1_27540492,1_27540641,1_27541301,1_27540483,1_27540798,1_27541065,1_27540663	0.319,0.077,0.0324,0.022,0.274,0.0205,0.0151,0.015,0.0322,0.0411,0.00442,0.00444,0.00447,0.00214,0.00335,0.00236,0.00354,0.00231,0.00285,0.00247,0.0028,0.00143,0.00111	4.89,5.18,5.12,4.73,5.99,17.7,5.35,15.8,14.9,15.8,15.5,5.3,15.5,14.8,3.44,4.91,4.91,15,2.6,14.7,3.23,3.16,3.71	3.51e-117,6.72e-114,2.18e-66,2.33e-64,1.96e-57,2.93e-38,5.2e-29,2.72e-21,1.23e-19,3.55e-16,4.49e-11,2.89e-10,2.2e-09,1.51e-08,1.8e-08,2.49e-07,3.95e-07,4.51e-07,1.4e-05,2.05e-05,9.57e-05,0.00233,0.00596	T:C,T:C,T:C,T:C,T:C,T:C,T:C,T:C,T:C,T:C,T:C,T:C,T:C,T:C,T:C,T:C,T:C,T:C,T:C,T:C,T:C,T:C,T:C
AT1G10630	ATARFA1F	-	AT1G10630.1,AT1G10630.2	163.7036336,NA	3	1_3513734,1_3513364,1_3513367	0.0617,0.00473,0.00311	6.86,14.1,13	8.15e-117,5.27e-06,0.000211	T:C,T:C,T:C
AT1G65980	PRXIIB	-	AT1G65980.1,AT1G65980.2	658.2535844,127.0271588	27	1_24560692,1_24560357,1_24560323,1_24559690,1_24560600,1_24559734,1_24560612,1_24560341,1_24560744,1_24559637,1_24559755,1_24559692,1_24560360,1_24559756,1_24560772,1_24559534,1_24560340,1_24559524,1_24559585,1_24559578,1_24560314,1_24560362,1_24559688,1_24560346,1_24560361,1_24559525,1_24559729	0.0826,0.0421,0.0428,0.0123,0.0071,0.0098,0.00441,0.00207,0.00346,0.00415,0.00904,0.0026,0.00133,0.00237,0.00215,0.00351,0.0019,0.00315,0.0016,0.00165,0.00139,0.000896,0.0017,0.000901,0.000781,0.00256,0.00074	5.57,5.54,5.15,5.86,4.57,6.47,3.86,16,14.9,4.43,3.35,5.07,13.7,4.03,13.7,4.75,3.02,4.64,4.51,3.51,3.62,4.38,4.36,2.81,3.9,3.88,3.64	5.92e-116,4.85e-71,5.07e-64,4.64e-28,6.42e-23,7.37e-19,1.96e-14,7.54e-13,1.31e-09,2.33e-09,5.19e-09,8.84e-08,4.03e-07,6.98e-07,3.01e-06,9.64e-06,1.17e-05,1.78e-05,2.35e-05,0.000136,0.000191,0.000194,0.000427,0.000878,0.00323,0.00509,0.00801	T:C,T:C,T:C,T:C,T:C,T:C,T:C,T:C,T:C,T:C,T:C,T:C,T:C,T:C,T:C,T:C,T:C,T:C,T:C,T:C,T:C,T:C,T:C,T:C,T:C,T:C,T:C
AT2G47110	RPS27AB	+	AT2G47110.1,AT2G47110.2	752.107594,NA	26	2_19345038,2_19345167,2_19345073,2_19345037,2_19344868,2_19344780,2_19345067,2_19345127,2_19344885,2_19344740,2_19344936,2_19345128,2_19344699,2_19345119,2_19345159,2_19345139,2_19345171,2_19345033,2_19345020,2_19344933,2_19345152,2_19344990,2_19345156,2_19344792,2_19344698,2_19344941	0.045,0.0737,0.0146,0.0656,0.00555,0.00345,0.00407,0.00632,0.00223,0.00386,0.00223,0.00415,0.0131,0.00212,0.00182,0.00139,0.00279,0.00239,0.00182,0.000856,0.00195,0.00137,0.00133,0.000834,0.0056,0.000713	4.8,19.6,17.6,3.2,4.2,14.4,5.86,4.74,5.48,5.4,3.59,3.75,4.11,4.56,14.6,12.3,4.45,2.52,2.39,4.04,2.88,2.58,3.82,3.62,3.68,2.91	3.56e-114,1.05e-88,1.23e-59,8.69e-39,1.19e-24,2.27e-15,1.95e-14,2.69e-12,1.66e-11,3.98e-11,6.36e-09,2.66e-08,5.65e-08,7.49e-06,2.7e-05,6.04e-05,6.64e-05,0.000306,0.000332,0.000473,0.000979,0.00126,0.0033,0.00409,0.00445,0.00715	A:G,A:G,A:G,A:G,A:G,A:G,A:G,A:G,A:G,A:G,A:G,A:G,A:G,A:G,A:G,A:G,A:G,A:G,A:G,A:G,A:G,A:G,A:G,A:G,A:G,A:G
AT3G47370	RPS20B	-	AT3G47370.1,AT3G47370.2,AT3G47370.3	519.8908866,NA	17	3_17454033,3_17454430,3_17453647,3_17453811,3_17454011,3_17453775,3_17454004,3_17454453,3_17453581,3_17453777,3_17453774,3_17453784,3_17453711,3_17454439,3_17453658,3_17453964,3_17453963	0.0563,0.0397,0.0525,0.0163,0.00693,0.0057,0.00415,0.00826,0.0167,0.00449,0.00327,0.00292,0.00262,0.0025,0.00243,0.00157,0.00106	4.62,5.66,17.6,5.25,4.25,5.94,4.88,14.8,5.7,5.61,15,3.33,4.3,4.17,13.2,3.16,3.55	4.13e-114,3.39e-73,2.26e-49,1.35e-27,5.81e-21,1.4e-15,4.11e-14,3.22e-13,4.35e-13,2.78e-12,1e-09,4.75e-05,0.000191,0.000286,0.000526,0.00191,0.00854	T:C,T:C,T:C,T:C,T:C,T:C,T:C,T:C,T:C,T:C,T:C,T:C,T:C,T:C,T:C,T:C,T:C
AT1G56200	emb1303	+	AT1G56200.1,AT1G56200.2	170.4218488,0.0228008	17	1_21031095,1_21030900,1_21031855,1_21031859,1_21031094,1_21031145,1_21031109,1_21031840,1_21030898,1_21031864,1_21031835,1_21031702,1_21031143,1_21031715,1_21031847,1_21030878,1_21031710	0.306,0.0498,0.0658,0.0498,0.0135,0.00784,0.00653,0.0181,0.00512,0.0126,0.0171,0.00343,0.00272,0.00403,0.0084,0.00386,0.00344	3.98,6.13,15.9,14.7,16,5.89,5.18,4.88,13.6,13.5,13.9,13.6,3.59,4.13,13.5,13.2,13.6	1.71e-113,1.46e-32,1.03e-24,1.36e-21,5.06e-16,1.59e-14,8.85e-09,4.17e-07,2.37e-06,3.21e-06,6.2e-06,4.77e-05,5.23e-05,0.000422,0.000651,0.000909,0.00127	A:G,A:G,A:G,A:G,A:G,A:G,A:G,A:G,A:G,A:G,A:G,A:G,A:G,A:G,A:G,A:G,A:G
AT2G17420	NTRA	+	AT2G17420.1,AT2G17420.2	195.1483136,0.3756624	13	2_7566235,2_7566383,2_7565382,2_7566413,2_7565272,2_7566412,2_7566377,2_7566333,2_7564963,2_7564984,2_7564705,2_7564537,2_7565342	0.0685,0.047,0.00433,0.0244,0.00621,0.0126,0.00523,0.00348,0.0032,0.00458,0.00166,0.00231,0.000749	7.98,17.6,5.23,5.77,3.85,13.6,13.8,13.8,3.53,3.68,3.85,2.62,3.62	2.33e-113,1.68e-48,2.41e-18,7.89e-13,6.84e-12,2.7e-07,5.05e-06,0.000109,0.000147,0.000206,0.00217,0.00447,0.00859	A:G,A:G,A:G,A:G,A:G,A:G,A:G,A:G,A:G,A:G,A:G,A:G,A:G
AT3G04840	RPS3AA	+	AT3G04840.1	432.400218	17	3_1331183,3_1331103,3_1331087,3_1331063,3_1331102,3_1331157,3_1330670,3_1331447,3_1331422,3_1330113,3_1330671,3_1331328,3_1331337,3_1331394,3_1331324,3_1331356,3_1331361	0.0954,0.0115,0.0173,0.00712,0.00456,0.00689,0.00301,0.00453,0.00374,0.00188,0.00224,0.00198,0.00156,0.00215,0.00132,0.00167,0.00142	5.59,4.29,4.84,4.22,6.3,4.75,3.52,5.27,15.7,3.03,3.3,4.85,4.47,4.51,12.3,2.55,3.15	1.47e-112,6.83e-34,1.03e-33,1.42e-23,7.15e-20,1.53e-17,2.58e-11,1.52e-09,5.73e-09,3.31e-07,3.83e-07,5.91e-07,3.28e-05,3.61e-05,0.000631,0.000949,0.00632	A:G,A:G,A:G,A:G,A:G,A:G,A:G,A:G,A:G,A:G,A:G,A:G,A:G,A:G,A:G,A:G,A:G
AT5G47210	AT5G47210	-	AT5G47210.1,AT5G47210.2,AT5G47210.3	176.561511,27.3707494,3.3960636	10	5_19169218,5_19169193,5_19169510,5_19169987,5_19169276,5_19169288,5_19169273,5_19169223,5_19169287,5_19170116	0.103,0.0092,0.00457,0.00455,0.00358,0.00247,0.00273,0.00287,0.00274,0.00104	7.34,14.5,3.01,2.77,4.62,12.6,15.2,4.27,4.21,11.8	1.64e-112,3.47e-13,8.31e-11,2.33e-07,9.26e-06,2.04e-05,0.000117,0.000171,0.000213,0.00427	T:C,T:C,T:C,T:C,T:C,T:C,T:C,T:C,T:C,T:C
AT1G77940	RPL30B	-	AT1G77940.1	1486.4130262	15	1_29304279,1_29305085,1_29304906,1_29304138,1_29305131,1_29304105,1_29304950,1_29304014,1_29305134,1_29304114,1_29305271,1_29304917,1_29305112,1_29305272,1_29305301	0.041,0.0126,0.00774,0.0113,0.00644,0.015,0.0069,0.0322,0.0022,0.00434,0.00102,0.00178,0.000609,0.00243,0.00147	9.05,4.49,16.2,17.2,16.3,4.95,5.32,14.9,14.6,4.76,13.6,2.7,14.4,2.36,3.69	3.66e-112,3.15e-43,1.42e-42,1.03e-29,1.51e-29,2.7e-26,1.73e-18,2.75e-18,9.71e-13,2.05e-06,0.000222,0.000351,0.000442,0.00107,0.00459	T:C,T:C,T:C,T:C,T:C,T:C,T:C,T:C,T:C,T:C,T:C,T:C,T:C,T:C,T:C
AT5G26667	UMK3	+	AT5G26667.2,AT5G26667.3,AT5G26667.4	153.879468,NA	2	5_9278113,5_9278108	0.186,0.00396	5.69,13.2	1.61e-111,7.49e-06	A:G,A:G
AT5G12140	CYS1	-	AT5G12140.1	987.5484044	4	5_3923142,5_3923821,5_3923329,5_3923169	0.303,0.0075,0.00224,0.00254	4.56,4.14,3.13,4.06	6.61e-111,9.92e-24,0.000222,0.000391	T:C,T:C,T:C,T:C
AT3G47350	HSD2	+	AT3G47350.2,AT3G47350.1	40.5759814,0	9	3_17450346,3_17449672,3_17449909,3_17449882,3_17450311,3_17450347,3_17449781,3_17450130,3_17449879	0.219,0.028,0.0145,0.00887,0.0127,0.00703,0.00388,0.00415,0.00464	4.41,4.91,4.45,5.34,3.82,4.36,13.8,4.19,3.93	8.3e-111,7e-28,5.46e-15,3e-10,1.63e-08,0.000125,0.000184,0.000296,0.00232	A:G,A:G,A:G,A:G,A:G,A:G,A:G,A:G,A:G
AT3G49430	SR34A	+	AT3G49430.1,AT3G49430.2	32.6711576,0.007632	11	3_18334337,3_18334501,3_18334857,3_18334483,3_18334861,3_18334325,3_18334821,3_18334684,3_18334672,3_18334313,3_18334355	0.251,0.107,0.0824,0.0258,0.039,0.0149,0.0221,0.00916,0.00775,0.0117,0.00593	4.36,5.42,14.9,6.15,13.7,3.55,4.86,13.6,12.8,2.73,12.3	6.47e-110,8.82e-74,1e-23,2.27e-18,1.91e-11,4.32e-07,1.45e-06,9.93e-06,4.33e-05,0.00112,0.00173	A:G,A:G,A:G,A:G,A:G,A:G,A:G,A:G,A:G,A:G,A:G
AT3G13920	TIF4A-1	-	AT3G13920.5,AT3G13920.1,AT3G13920.3,AT3G13920.2,AT3G13920.4	101.4500062,36.3246418,0.0838324,0,0.0688586	9	3_4592551,3_4592570,3_4593557,3_4593388,3_4592989,3_4593606,3_4592587,3_4592622,3_4593616	0.0678,0.0156,0.0289,0.00982,0.00324,0.0022,0.00178,0.00135,0.00158	6.25,6.91,2.52,4.11,13.5,12.3,3.12,3.76,13.8	8.71e-110,2.74e-28,8.55e-22,2.04e-19,3.1e-07,5.75e-05,0.0036,0.00409,0.00432	T:C,T:C,T:C,T:C,T:C,T:C,T:C,T:C,T:C
AT3G56020	RPL41E	-	AT3G56020.1	1819.3091496	8	3_20790848,3_20790858,3_20790857,3_20790863,3_20790870,3_20790887,3_20790849,3_20790861	0.0743,0.0198,0.0143,0.0128,0.0102,0.0109,0.00802,0.00341	19.8,6.95,4.96,17.3,6.1,15.1,14.1,12.9	9.71e-110,2.08e-31,4.75e-23,3.93e-20,2.19e-18,3.42e-12,4.06e-12,3.7e-07	T:C,T:C,T:C,T:C,T:C,T:C,T:C,T:C
AT1G18070	AT1G18070	-	AT1G18070.1,AT1G18070.3	28.541775,0.0763806	9	1_6214379,1_6214257,1_6213978,1_6214727,1_6213878,1_6214256,1_6214424,1_6214076,1_6214215	0.199,0.157,0.236,0.017,0.0261,0.0184,0.00797,0.00944,0.00651	6.03,17.9,6.56,15.3,13.2,2.55,12.9,4.38,12.6	2.58e-109,9.32e-68,1.02e-62,5.18e-15,2.96e-07,1.26e-05,2.57e-05,9.36e-05,0.00124	T:C,T:C,T:C,T:C,T:C,T:C,T:C,T:C,T:C
AT4G32720	LA1	+	AT4G32720.1,AT4G32720.2	28.6264588,0.4809962	14	4_15789218,4_15789192,4_15789658,4_15789600,4_15788965,4_15789625,4_15789661,4_15789660,4_15789072,4_15789603,4_15788075,4_15788943,4_15788667,4_15789624	0.161,0.0309,0.102,0.069,0.0269,0.0352,0.0363,0.0343,0.00762,0.0264,0.00731,0.00996,0.00777,0.0125	4.38,15.3,15.2,3.7,5.54,13.6,13.6,13.5,14.1,3.78,12.5,3.12,3.03,12	1.24e-108,2.7e-30,3.14e-24,1.28e-12,4.12e-11,4.61e-10,1.77e-09,9.3e-09,5.18e-07,1.06e-05,0.00121,0.00201,0.00327,0.00743	A:G,A:G,A:G,A:G,A:G,A:G,A:G,A:G,A:G,A:G,A:G,A:G,A:G,A:G
AT2G36160	RPS14A	+	AT2G36160.1	688.3774056	35	2_15169879,2_15170712,2_15170292,2_15170286,2_15170963,2_15171121,2_15170781,2_15170277,2_15170713,2_15170373,2_15170925,2_15170739,2_15170706,2_15171142,2_15170875,2_15170276,2_15170931,2_15170895,2_15171144,2_15170950,2_15171139,2_15170338,2_15170885,2_15170901,2_15170874,2_15170291,2_15170284,2_15169876,2_15169883,2_15170504,2_15170490,2_15170720,2_15170947,2_15171151,2_15170999	0.187,0.0219,0.0479,0.0332,0.0257,0.0277,0.0268,0.0208,0.00792,0.00643,0.00617,0.00515,0.00402,0.0149,0.0126,0.00675,0.00563,0.00505,0.00705,0.00636,0.00624,0.0022,0.00218,0.00179,0.00117,0.00211,0.00304,0.00462,0.00421,0.000988,0.000843,0.00201,0.000805,0.00367,0.0012	3.93,6.39,6.43,7.82,5.63,5.48,5.32,6.05,7.08,17.8,5.01,6.1,4.76,17.6,3.56,6.05,5.08,17,5.91,6.05,4.27,14.7,4.22,4.27,4.26,14.7,3.51,4.16,13.8,4.26,2.91,2.63,3.76,3.19,13.6	1.9e-108,3.13e-83,2.1e-63,8.62e-56,3.79e-53,3.64e-43,5.64e-38,2.44e-36,3.62e-34,2.24e-31,2.65e-23,4.49e-22,3.64e-19,1.41e-18,1.57e-18,1.74e-17,1.62e-16,2.59e-16,3.7e-15,2.9e-14,1e-11,8.67e-11,1.34e-08,1.6e-07,0.000134,0.000147,0.000167,0.000235,0.000417,0.00151,0.00328,0.00357,0.00435,0.00492,0.0057	A:G,A:G,A:G,A:G,A:G,A:G,A:G,A:G,A:G,A:G,A:G,A:G,A:G,A:G,A:G,A:G,A:G,A:G,A:G,A:G,A:G,A:G,A:G,A:G,A:G,A:G,A:G,A:G,A:G,A:G,A:G,A:G,A:G,A:G,A:G
AT2G23350	PAB4	+	AT2G23350.1	51.0369176	36	2_9945547,2_9944705,2_9943495,2_9943836,2_9945662,2_9945840,2_9945678,2_9945933,2_9945862,2_9943420,2_9944907,2_9945588,2_9945649,2_9945022,2_9945661,2_9944452,2_9945983,2_9945349,2_9945987,2_9944425,2_9945551,2_9945151,2_9944700,2_9945994,2_9945861,2_9946000,2_9945069,2_9943725,2_9944382,2_9945020,2_9943943,2_9944912,2_9943474,2_9943923,2_9944297,2_9943333	0.138,0.172,0.0978,0.0675,0.0308,0.0267,0.0263,0.0264,0.0178,0.0235,0.0179,0.0205,0.0143,0.0149,0.0121,0.0183,0.0152,0.0106,0.0169,0.0223,0.0104,0.00636,0.0238,0.0124,0.00688,0.0118,0.00488,0.00552,0.00764,0.00337,0.00786,0.0031,0.0028,0.00429,0.00595,0.00324	7.87,2.94,6.1,4.36,16.8,6.68,16,5.45,15.5,4.21,15.3,16.2,15.7,5.07,14.9,13.9,15.9,5.4,14,5.29,15.2,14.4,2.35,4.16,13.2,3.1,14.4,13.4,12.6,12.9,3.33,12.8,12.9,11.6,3.72,12.6	4.85e-107,5.64e-98,1.77e-54,1e-39,1.99e-31,3.15e-25,3.44e-21,2.99e-20,2.91e-19,1.06e-18,1.43e-18,2.01e-18,3.33e-17,7.91e-17,4.79e-15,3.87e-14,3.28e-12,1.1e-10,1.31e-10,5.96e-10,1.2e-09,3.51e-09,6.35e-09,1.77e-07,5.05e-07,1.03e-05,1.23e-05,4.85e-05,4.99e-05,0.000175,0.000226,0.000424,0.00132,0.00334,0.00363,0.00843	A:G,A:G,A:G,A:G,A:G,A:G,A:G,A:G,A:G,A:G,A:G,A:G,A:G,A:G,A:G,A:G,A:G,A:G,A:G,A:G,A:G,A:G,A:G,A:G,A:G,A:G,A:G,A:G,A:G,A:G,A:G,A:G,A:G,A:G,A:G,A:G
AT4G39680	AT4G39680	-	AT4G39680.1,AT4G39680.2	12.8790484,NA	5	4_18414907,4_18415237,4_18414658,4_18414898,4_18414630	0.377,0.202,0.0241,0.0097,0.0125	3.75,2.63,15,13,12.1	9.66e-107,1.49e-28,4.45e-07,0.000994,0.0012	T:C,T:C,T:C,T:C,T:C
AT5G18380	RPS16C	-	AT5G18380.1,AT5G18380.3,AT5G18380.2	1491.7844228,81.4166384,0.482796	30	5_6090321,5_6090272,5_6090455,5_6090566,5_6090318,5_6090591,5_6090596,5_6090462,5_6090644,5_6090248,5_6090679,5_6090260,5_6090709,5_6090350,5_6090249,5_6090464,5_6090269,5_6090647,5_6090515,5_6090661,5_6090600,5_6090305,5_6090266,5_6090116,5_6090306,5_6090254,5_6090693,5_6090697,5_6090560,5_6090617	0.0418,0.0425,0.0249,0.00826,0.0139,0.0115,0.00296,0.00397,0.00389,0.0086,0.00304,0.00331,0.004,0.00513,0.00254,0.00116,0.00208,0.0022,0.000627,0.00096,0.000645,0.00128,0.000908,0.00618,0.00214,0.00147,0.000845,0.000608,0.000846,0.000874	6.78,7.79,5.18,4.59,5.7,5.53,5.35,3.9,6.25,4.69,5.92,15.4,5.69,3.85,5.33,4.07,4.98,2.84,14.4,4.41,4.23,4.44,13.6,3.47,2.52,3.46,3.94,11.9,2.02,2.01	4.83e-106,7.1e-100,7.12e-74,2.02e-51,2.73e-39,3.1e-36,2.35e-22,2.03e-18,1.37e-17,2.21e-17,2.8e-16,5.15e-15,9.21e-14,2.82e-13,5.15e-10,1.88e-07,1.57e-06,7.58e-06,2.25e-05,2.86e-05,8.47e-05,0.000124,0.000166,0.000173,0.000301,0.000635,0.00101,0.00275,0.00375,0.00471	T:C,T:C,T:C,T:C,T:C,T:C,T:C,T:C,T:C,T:C,T:C,T:C,T:C,T:C,T:C,T:C,T:C,T:C,T:C,T:C,T:C,T:C,T:C,T:C,T:C,T:C,T:C,T:C,T:C,T:C
AT3G07110	RPL13AA	+	AT3G07110.1,AT3G07110.2	343.9361004,0.7267766	19	3_2252685,3_2252294,3_2252636,3_2253253,3_2252284,3_2252077,3_2253208,3_2252175,3_2253325,3_2252258,3_2252902,3_2253221,3_2252180,3_2252675,3_2253199,3_2253202,3_2253207,3_2253258,3_2252688	0.0901,0.0114,0.0104,0.00934,0.00601,0.0119,0.00758,0.00306,0.00697,0.00251,0.00212,0.00233,0.00173,0.0018,0.00122,0.00158,0.00151,0.00288,0.00261	4.71,16.7,17.1,17,15.8,14.7,16.7,5.36,14.1,4.3,4.59,14.5,3.45,3.4,12.6,3.92,3.86,1.76,1.99	3.27e-105,7.37e-49,1.02e-35,2.58e-20,8.55e-20,4.43e-17,6.15e-11,8.78e-11,2.17e-10,9.44e-10,1.09e-05,2.97e-05,0.000107,0.00097,0.00111,0.00216,0.00245,0.00313,0.00465	A:G,A:G,A:G,A:G,A:G,A:G,A:G,A:G,A:G,A:G,A:G,A:G,A:G,A:G,A:G,A:G,A:G,A:G,A:G
AT2G47690	AT2G47690	+	AT2G47690.1,AT2G47690.2,AT2G47690.3	564.4812066,1.397561,0.2393068	10	2_19552022,2_19551462,2_19552013,2_19552012,2_19551463,2_19552072,2_19551367,2_19552115,2_19551495,2_19552197	0.139,0.0158,0.0155,0.0095,0.00165,0.00251,0.014,0.00311,0.000883,0.0032	5.34,6.27,6.22,4.72,4.22,4.29,4.11,4.11,2.96,3.7	1.51e-104,5.71e-39,3.96e-24,7.39e-11,2.21e-05,9.65e-05,0.000331,0.00104,0.00324,0.00617	A:G,A:G,A:G,A:G,A:G,A:G,A:G,A:G,A:G,A:G
AT4G25740	RPS10A	-	AT4G25740.1,AT4G25740.2	269.3031348,0.0283174	9	4_13107990,4_13107843,4_13107556,4_13107518,4_13107927,4_13107790,4_13107972,4_13107453,4_13108045	0.0717,0.0119,0.0114,0.0107,0.00317,0.00356,0.00202,0.00574,0.00156	5.04,2.86,4.25,4.67,4.19,3.75,4.58,12.4,3.78	2.58e-104,3.09e-17,1.29e-15,2.17e-11,9.22e-08,3.35e-06,7.36e-06,0.000151,0.000718	T:C,T:C,T:C,T:C,T:C,T:C,T:C,T:C,T:C
AT5G66860	AT5G66860	-	AT5G66860.1	58.1526284	5	5_26701926,5_26701925,5_26701927,5_26702434,5_26702324	0.255,0.0109,0.0076,0.00789,0.00371	4.5,3.73,4.38,2.96,3.97	3.02e-104,1.64e-05,7.38e-05,0.000227,0.000814	T:C,T:C,T:C,T:C,T:C
AT4G31340	AT4G31340	+	AT4G31340.1,AT4G31340.2	55.4730722,0.0656542	20	4_15208977,4_15209330,4_15209359,4_15207369,4_15208895,4_15209377,4_15208396,4_15208946,4_15208883,4_15209457,4_15208875,4_15209400,4_15206245,4_15208921,4_15208877,4_15209294,4_15208876,4_15205820,4_15208922,4_15208745	0.259,0.0494,0.0345,0.0539,0.0158,0.0217,0.0157,0.0087,0.00652,0.0229,0.00925,0.0076,0.00617,0.0039,0.00392,0.00335,0.0038,0.00425,0.00545,0.00382	5.66,18,15,3.5,15.9,16.4,5.79,14.5,13.1,15.1,14.5,12.8,13.7,14.3,13.3,13.7,13.9,13.7,3.34,14.3	3.67e-104,2.05e-50,3.61e-31,1.01e-28,3.78e-18,5.29e-17,2.22e-13,2.99e-11,4.37e-07,7.77e-07,1.86e-06,6.41e-06,8.02e-06,3.05e-05,0.000124,0.000161,0.000262,0.000987,0.00114,0.00532	A:G,A:G,A:G,A:G,A:G,A:G,A:G,A:G,A:G,A:G,A:G,A:G,A:G,A:G,A:G,A:G,A:G,A:G,A:G,A:G
AT1G69620	RPL34B	+	AT1G69620.1	1291.2049756	17	1_26190809,1_26191077,1_26190107,1_26191131,1_26191085,1_26191102,1_26189972,1_26190899,1_26189952,1_26190124,1_26191145,1_26190851,1_26189919,1_26190100,1_26189886,1_26190109,1_26190082	0.0345,0.0105,0.00672,0.01,0.00401,0.00305,0.00152,0.00304,0.00149,0.00318,0.0048,0.00136,0.0026,0.000502,0.00464,0.000597,0.000551	3.98,15.3,4.24,17.1,15.7,14.9,3.87,3.67,13.7,2.63,13.5,2.54,2.27,12.2,2.08,3.48,14.3	6.54e-104,6.31e-30,9.72e-29,6.35e-16,1.02e-10,1.65e-07,1.15e-06,3.61e-06,8.08e-06,2.96e-05,7.4e-05,0.000196,0.000297,0.000612,0.00112,0.0036,0.00414	A:G,A:G,A:G,A:G,A:G,A:G,A:G,A:G,A:G,A:G,A:G,A:G,A:G,A:G,A:G,A:G,A:G
AT1G33140	RPL9B	+	AT1G33140.1	708.409151	28	1_12024490,1_12024492,1_12024479,1_12024496,1_12023998,1_12024495,1_12024529,1_12024474,1_12023999,1_12024483,1_12023697,1_12023913,1_12024432,1_12024447,1_12023911,1_12024018,1_12023730,1_12024522,1_12024550,1_12023624,1_12024503,1_12023669,1_12023696,1_12024417,1_12023979,1_12023907,1_12024435,1_12024423	0.0426,0.0366,0.0274,0.0384,0.00809,0.00958,0.0115,0.00568,0.01,0.00514,0.0169,0.0072,0.00488,0.00677,0.00644,0.00297,0.00528,0.00246,0.00272,0.0157,0.00144,0.00921,0.00294,0.00084,0.00109,0.00178,0.00139,0.000989	7.83,7.7,6.63,6.42,6.13,16.5,17.2,6.72,4.78,16.1,5.52,5.1,17.4,2.48,3.88,3.54,5.41,15,14.7,4.65,14.3,2.29,13.9,14.9,3.26,3.86,2.05,2.33	1.02e-103,2.3e-95,1.25e-70,1.09e-61,6.34e-37,1.19e-36,4.15e-32,5.22e-28,6.32e-28,2.56e-25,5.17e-22,2.6e-16,2.44e-14,2.1e-12,4.39e-11,6.41e-11,1.53e-10,6.77e-09,2.39e-07,1.02e-05,9.41e-05,0.000261,0.000554,0.000736,0.00106,0.00352,0.00964,0.00992	A:G,A:G,A:G,A:G,A:G,A:G,A:G,A:G,A:G,A:G,A:G,A:G,A:G,A:G,A:G,A:G,A:G,A:G,A:G,A:G,A:G,A:G,A:G,A:G,A:G,A:G,A:G,A:G
AT5G28060	RPS24B	-	AT5G28060.1	794.193482	32	5_10070317,5_10069771,5_10070309,5_10069717,5_10069792,5_10070260,5_10069772,5_10069937,5_10069660,5_10070316,5_10070259,5_10069781,5_10069773,5_10069801,5_10069919,5_10069791,5_10070231,5_10069795,5_10069796,5_10070437,5_10069975,5_10070254,5_10070220,5_10070744,5_10069798,5_10070453,5_10069949,5_10070173,5_10070187,5_10069988,5_10070310,5_10069967	0.117,0.0447,0.0418,0.634,0.0395,0.0174,0.00876,0.0117,0.0154,0.00987,0.00556,0.00569,0.00478,0.00386,0.00441,0.0038,0.00284,0.0031,0.00444,0.00392,0.0034,0.00183,0.00174,0.0048,0.00215,0.0014,0.00159,0.00168,0.000657,0.00109,0.00125,0.00173	4.27,7.54,6.53,2.62,7.14,5.5,16.5,4.57,6.24,4.36,3.46,16.2,5.85,4.74,15.9,13.8,5.42,4.34,3.44,3.01,4.52,3.77,4.75,2.85,4.72,4.44,3,3.29,14.2,3.32,14.1,3.23	1.02e-103,4.4e-82,8.35e-82,5.46e-81,1.06e-63,1.9e-42,3.35e-27,2.12e-24,1.44e-18,2.97e-18,5.75e-17,1.16e-16,2.29e-14,4.44e-12,7.23e-12,1.53e-10,6.27e-10,8.03e-09,4.54e-08,2.27e-07,6.56e-07,3.09e-06,1.74e-05,2.33e-05,3.04e-05,3.22e-05,0.000127,0.000193,0.000486,0.000586,0.000838,0.00973	T:C,T:C,T:C,T:C,T:C,T:C,T:C,T:C,T:C,T:C,T:C,T:C,T:C,T:C,T:C,T:C,T:C,T:C,T:C,T:C,T:C,T:C,T:C,T:C,T:C,T:C,T:C,T:C,T:C,T:C,T:C,T:C
AT1G76200	AT1G76200	+	AT1G76200.1	1795.0872046	11	1_28594513,1_28594560,1_28593421,1_28594580,1_28594553,1_28593412,1_28594597,1_28594592,1_28593801,1_28594529,1_28594526	0.111,0.0726,0.0115,0.0137,0.014,0.00459,0.0062,0.00296,0.00203,0.00245,0.00117	9.02,18,6.87,5.47,17.5,5.4,14.5,14.8,2.98,3.51,3.61	9.21e-103,1.1e-61,2.15e-28,5.29e-20,6.09e-20,3.28e-11,1.54e-07,2.51e-06,2.26e-05,9.2e-05,0.00887	A:G,A:G,A:G,A:G,A:G,A:G,A:G,A:G,A:G,A:G,A:G
AT5G40770	PHB3	-	AT5G40770.1	96.3553028	12	5_16315460,5_16315431,5_16315427,5_16315452,5_16315428,5_16315430,5_16316608,5_16316058,5_16315675,5_16315429,5_16316522,5_16315711	0.174,0.106,0.111,0.0372,0.0145,0.0137,0.0107,0.00498,0.00579,0.0086,0.00295,0.00454	6.47,16.7,6.22,15.1,15.6,15.6,4.89,4.59,3.57,15,13.7,3.3	1.19e-102,1.75e-63,3.46e-52,9.97e-26,8.29e-12,4.94e-11,1.13e-07,1.43e-05,8.42e-05,0.000112,0.000233,0.000658	T:C,T:C,T:C,T:C,T:C,T:C,T:C,T:C,T:C,T:C,T:C,T:C
AT1G30880	AT1G30880	-	AT1G30880.1,AT1G30880.2	288.713143,0.1707756	11	1_10993499,1_10993485,1_10993407,1_10993341,1_10993452,1_10993955,1_10993455,1_10993440,1_10993964,1_10993434,1_10993411	0.19,0.0283,0.0143,0.0276,0.00656,0.00867,0.00452,0.00555,0.00265,0.0037,0.00426	4.59,18.1,15.7,14.6,5.45,16.2,13.4,4.93,13.2,3.33,4.09	1.5e-102,1.19e-29,5.85e-15,1.32e-13,7.92e-11,8.94e-10,1.29e-07,2.75e-07,0.000231,0.000661,0.00152	T:C,T:C,T:C,T:C,T:C,T:C,T:C,T:C,T:C,T:C,T:C
AT3G09200	RPP0B	-	AT3G09200.1,AT3G09200.2	460.4199044,0.0064156	51	3_2823365,3_2824978,3_2823481,3_2824992,3_2823974,3_2824628,3_2823886,3_2823986,3_2823881,3_2823434,3_2823792,3_2824995,3_2823952,3_2823430,3_2823808,3_2823406,3_2823683,3_2824798,3_2824818,3_2824608,3_2823660,3_2824825,3_2823770,3_2823922,3_2823428,3_2824837,3_2825005,3_2823422,3_2823418,3_2823714,3_2824602,3_2823674,3_2823608,3_2823648,3_2824800,3_2823975,3_2824896,3_2823325,3_2823602,3_2823505…	0.0807,0.0278,0.0621,0.0397,0.0302,0.0216,0.0242,0.013,0.0277,0.014,0.0165,0.033,0.0118,0.0226,0.00921,0.0107,0.0104,0.00767,0.00428,0.00519,0.00322,0.00437,0.00433,0.00437,0.00462,0.00204,0.00458,0.00202,0.00205,0.00211,0.00107,0.0028,0.0024,0.000957,0.00157,0.00102,0.00206,0.00171,0.00121,0.000778,0.00166,0.000833,0.00128,0.000849,0.00119,0.00118,0.000752,0.00159,0.00226,0.0012,0.000596	7.27,5.09,3.01,6.58,5.21,4.35,5.91,5.01,4,4.89,5.21,7.39,4.59,4.95,4.84,5.98,5.79,3.17,17.2,3.37,5.9,4.37,4.4,3.98,3.57,5.19,15.4,5.03,5.01,3.08,4.47,2.92,3.27,13.3,3.17,13.8,3.18,12.1,4.14,13.4,14.1,4.04,3.39,2.8,2.73,3.08,3.06,2.36,2.03,2.83,3.63	2.48e-102,3.25e-78,8.93e-78,8.24e-73,6.49e-65,5.34e-59,2.21e-57,3.4e-42,3.63e-41,1.51e-40,4.44e-40,1.4e-39,1.56e-38,1.19e-37,7.6e-32,5.46e-30,7.79e-24,3.26e-21,2.56e-18,1.82e-16,4.08e-14,5.32e-14,1.55e-12,1.06e-11,1.36e-11,7.39e-09,8.5e-09,8.58e-08,1.15e-07,4.2e-07,2.36e-06,3.01e-06,6.87e-06,2.8e-05,6.64e-05,0.000109,0.000143,0.000226,0.000363,0.000427,0.000809,0.000904,0.00121,0.00127,0.0022,0.0…	T:C,T:C,T:C,T:C,T:C,T:C,T:C,T:C,T:C,T:C,T:C,T:C,T:C,T:C,T:C,T:C,T:C,T:C,T:C,T:C,T:C,T:C,T:C,T:C,T:C,T:C,T:C,T:C,T:C,T:C,T:C,T:C,T:C,T:C,T:C,T:C,T:C,T:C,T:C,T:C,T:C,T:C,T:C,T:C,T:C,T:C,T:C,T:C,T:C,T:C,T:C
AT5G56670	RPS30C	-	AT5G56670.1	4348.1484468	10	5_22935404,5_22935408,5_22935373,5_22935764,5_22935769,5_22935396,5_22936025,5_22935397,5_22935766,5_22935441	0.121,0.0115,0.00509,0.00311,0.00229,0.0014,0.00416,0.00147,0.000691,0.000709	3.91,7.06,15,3.12,3.82,3.39,4.15,2.8,3.18,3.85	4.54e-102,5.31e-32,1.87e-11,6.41e-09,2.39e-08,0.000375,0.000592,0.00117,0.00565,0.00663	T:C,T:C,T:C,T:C,T:C,T:C,T:C,T:C,T:C,T:C
AT1G14980	CPN10	-	AT1G14980.1,AT1G14980.2	951.9018152,0.4810706	11	1_5166568,1_5165853,1_5166362,1_5166387,1_5166383,1_5166450,1_5166349,1_5165860,1_5165912,1_5165907,1_5165743	0.113,0.0591,0.0212,0.0153,0.00941,0.00826,0.00584,0.00568,0.00197,0.00225,0.0139	4.78,17.1,5.09,6.95,5.52,5.42,16.1,14.3,14.2,13,12.7	6.48e-102,4.09e-61,1.82e-44,7.6e-30,3.47e-23,1.13e-21,5.13e-17,1.19e-07,8.73e-06,7.96e-05,0.000944	T:C,T:C,T:C,T:C,T:C,T:C,T:C,T:C,T:C,T:C,T:C
AT2G39390	RPL35B	-	AT2G39390.1	822.9643612	8	2_16451050,2_16451540,2_16450991,2_16451527,2_16451072,2_16450852,2_16451595,2_16451056	0.0703,0.00394,0.00274,0.00119,0.00134,0.00309,0.00141,0.000864	4.45,6.27,3.09,3.69,3.57,4.46,4.13,3.96	1.67e-101,7.06e-20,4.21e-06,1.27e-05,2.72e-05,2.91e-05,0.000619,0.00165	T:C,T:C,T:C,T:C,T:C,T:C,T:C,T:C
AT3G55440	CTIMC	+	AT3G55440.1	767.6665764	20	3_20556090,3_20554547,3_20555299,3_20556187,3_20556273,3_20556089,3_20555885,3_20554575,3_20556077,3_20555893,3_20556190,3_20554234,3_20555762,3_20556188,3_20555746,3_20555749,3_20555195,3_20553828,3_20554224,3_20556189	0.0878,0.0342,0.00744,0.00975,0.0552,0.00373,0.00173,0.00148,0.00359,0.00238,0.00375,0.000476,0.000959,0.0014,0.00037,0.000451,0.00041,0.000538,0.000462,0.00143	4.88,3.3,4.43,6.05,3.57,5.54,4.16,2.91,2.98,3.67,4.46,13.8,2.18,13.8,11.8,3.75,12.8,12.6,3.66,11.7	1.81e-100,9.49e-56,3.12e-19,9.89e-17,1.43e-15,2.34e-10,3.19e-07,1.66e-05,5.7e-05,0.000109,0.000121,0.00067,0.00166,0.00185,0.00205,0.00336,0.00432,0.00446,0.00511,0.00845	A:G,A:G,A:G,A:G,A:G,A:G,A:G,A:G,A:G,A:G,A:G,A:G,A:G,A:G,A:G,A:G,A:G,A:G,A:G,A:G
AT2G20530	PHB6	+	AT2G20530.1,AT2G20530.2	40.192898,NA	13	2_8843746,2_8843677,2_8843747,2_8842438,2_8843022,2_8843625,2_8843758,2_8843796,2_8843624,2_8843725,2_8842363,2_8842040,2_8843714	0.207,0.017,0.0111,0.00991,0.0132,0.00747,0.0159,0.0107,0.0079,0.00603,0.00601,0.0288,0.00597	7.78,16,13.3,4.73,13.5,12.7,4.72,13.3,4.44,12.4,12.7,3.06,12.4	1.61e-99,1.11e-12,1.11e-06,2.27e-06,5.33e-06,8.54e-06,9.03e-06,2.42e-05,3.81e-05,0.000344,0.00137,0.00204,0.00481	A:G,A:G,A:G,A:G,A:G,A:G,A:G,A:G,A:G,A:G,A:G,A:G,A:G
AT5G48230	AAT1	-	AT5G48230.2,AT5G48230.1	73.1600956,0.008757	7	5_19552634,5_19554675,5_19553429,5_19554785,5_19552448,5_19553078,5_19553187	0.107,0.00992,0.0105,0.0118,0.00815,0.00524,0.0039	6.68,14.5,4.35,5.16,15.4,13.7,13.7	2.34e-99,1.02e-11,2.84e-09,1e-08,1.44e-06,1.5e-05,0.000352	T:C,T:C,T:C,T:C,T:C,T:C,T:C
AT1G73940	AT1G73940	-	AT1G73940.1	131.3887222	9	1_27799299,1_27798519,1_27798401,1_27798523,1_27798435,1_27798600,1_27798522,1_27798582,1_27798527	0.18,0.0355,0.0341,0.0151,0.0185,0.00956,0.00643,0.00553,0.00553	3.92,15,13.5,13.8,14,4.48,12.5,12.9,12.9	3.66e-99,1.28e-15,1.22e-10,5.03e-09,1.4e-05,0.000219,0.000512,0.000725,0.00118	T:C,T:C,T:C,T:C,T:C,T:C,T:C,T:C,T:C
AT3G62250	RPS27AC	+	AT3G62250.1	915.3466304	20	3_23037596,3_23037605,3_23037322,3_23037620,3_23037565,3_23037448,3_23037592,3_23037564,3_23037283,3_23037217,3_23037510,3_23037626,3_23037385,3_23037382,3_23037223,3_23037325,3_23037406,3_23037611,3_23037504,3_23037427	0.0494,0.0135,0.0117,0.0156,0.0109,0.0113,0.00927,0.00801,0.00535,0.00939,0.00514,0.00578,0.00271,0.00234,0.00157,0.00122,0.00109,0.00142,0.000873,0.000865	6.69,7.43,5.43,4.61,4.39,4.36,4.49,4.8,4.87,3.7,6.2,5.96,4.36,4.47,4.47,3.47,3.65,4.22,4.06,3.11	7.39e-99,5.74e-44,4.5e-42,2.77e-38,3.25e-37,3.62e-37,3.69e-24,3.78e-24,1.61e-20,1.18e-17,3.62e-17,8.43e-16,4.6e-14,3.14e-10,1.3e-05,7.15e-05,9.27e-05,0.000257,0.000667,0.00227	A:G,A:G,A:G,A:G,A:G,A:G,A:G,A:G,A:G,A:G,A:G,A:G,A:G,A:G,A:G,A:G,A:G,A:G,A:G,A:G
AT1G15930	RPS12A	+	AT1G15930.1,AT1G15930.2	615.1504098,NA	36	1_5472740,1_5472184,1_5472700,1_5472369,1_5472697,1_5472712,1_5472290,1_5472721,1_5472847,1_5472252,1_5472554,1_5472722,1_5472272,1_5472727,1_5472259,1_5472199,1_5472821,1_5472315,1_5472763,1_5472818,1_5472709,1_5472200,1_5472584,1_5472825,1_5472316,1_5472545,1_5472376,1_5472743,1_5471707,1_5472389,1_5472741,1_5472761,1_5472527,1_5472246,1_5472238,1_5472360	0.0593,0.0456,0.0428,0.0261,0.0178,0.0101,0.00616,0.00486,0.0151,0.00377,0.00584,0.00582,0.00255,0.00424,0.00278,0.00339,0.0159,0.00357,0.00636,0.0051,0.00197,0.0017,0.00198,0.00494,0.00183,0.00154,0.00106,0.00165,0.00281,0.00296,0.0014,0.00113,0.00113,0.000961,0.00174,0.000829	8.92,3.98,7.33,6.55,7.2,16.6,4.63,15.9,16.2,5.88,5.98,4.38,15,15.4,15.1,5.22,5.63,3.84,3.87,14.3,13.7,14.4,4.81,4.72,3.34,14.3,13.8,4.2,2.16,3.79,4.02,13.9,3.18,3.66,2.46,2.9	1.14e-98,8.38e-92,7.29e-75,3.73e-46,5.14e-31,2.13e-22,4.07e-18,5.26e-17,2.25e-16,1.69e-15,1.98e-13,2.04e-13,6.26e-13,1.05e-12,3.71e-12,8.43e-12,6.9e-11,2.14e-09,1.08e-07,1.23e-07,2.04e-07,3.45e-07,1.61e-06,3.44e-06,1.62e-05,3.04e-05,3.61e-05,0.000281,0.000311,0.000593,0.000963,0.00109,0.00119,0.00414,0.00591,0.00748	A:G,A:G,A:G,A:G,A:G,A:G,A:G,A:G,A:G,A:G,A:G,A:G,A:G,A:G,A:G,A:G,A:G,A:G,A:G,A:G,A:G,A:G,A:G,A:G,A:G,A:G,A:G,A:G,A:G,A:G,A:G,A:G,A:G,A:G,A:G,A:G
AT5G07090	RPS4B	+	AT5G07090.1,AT5G07090.2	315.7804016,0	27	5_2203878,5_2203016,5_2203796,5_2203638,5_2203060,5_2203009,5_2203061,5_2203395,5_2203390,5_2202735,5_2203044,5_2203795,5_2203626,5_2203823,5_2203575,5_2203036,5_2203603,5_2203845,5_2203920,5_2203656,5_2203918,5_2203847,5_2203037,5_2202994,5_2203769,5_2203677,5_2202946	0.0803,0.0412,0.0193,0.00775,0.00873,0.00514,0.0073,0.00649,0.0066,0.0115,0.00429,0.00276,0.00388,0.00255,0.00394,0.00177,0.000974,0.00144,0.00217,0.00109,0.00281,0.00196,0.000891,0.00185,0.00162,0.00134,0.000818	8.9,4.94,6.61,5.65,4.91,4.51,4.38,4.41,3.66,15.2,15.3,14.2,4.31,14.7,2.94,4.57,13.2,12.4,13,3.93,3.88,3.14,13.5,1.94,2.67,2.64,12.9	4.14e-98,6.45e-61,6.55e-48,3.95e-25,1.41e-21,2.08e-16,3.44e-14,7.66e-14,4.77e-12,6.25e-12,4.85e-11,9.08e-10,5.63e-09,1.41e-06,2.37e-06,5.97e-06,0.000858,0.000991,0.00101,0.00144,0.00154,0.00232,0.00263,0.00319,0.00371,0.00432,0.00732	A:G,A:G,A:G,A:G,A:G,A:G,A:G,A:G,A:G,A:G,A:G,A:G,A:G,A:G,A:G,A:G,A:G,A:G,A:G,A:G,A:G,A:G,A:G,A:G,A:G,A:G,A:G
AT5G55190	RAN3	+	AT5G55190.1	181.0161318	23	5_22392829,5_22393296,5_22392457,5_22393956,5_22392832,5_22393961,5_22393770,5_22393463,5_22392993,5_22393953,5_22393531,5_22393964,5_22393551,5_22393557,5_22393924,5_22393289,5_22393005,5_22393916,5_22392800,5_22393909,5_22392813,5_22393344,5_22393548	0.0619,0.0535,0.0643,0.0648,0.0137,0.0294,0.0283,0.0207,0.0127,0.0109,0.0039,0.00699,0.00394,0.00411,0.00893,0.00488,0.00312,0.00378,0.00181,0.002,0.00218,0.00169,0.00133	4.58,7.4,7.25,18,7.04,7.13,5.65,4.74,6.46,14.7,15.3,14.1,5.17,4.26,4.34,14.6,4.7,3.37,4.13,4.17,4.05,14,13.1	5.23e-98,8.32e-81,8.6e-75,1.01e-57,1.07e-35,7.23e-35,8.69e-34,4.93e-30,3.19e-22,2.64e-11,3.81e-10,3.9e-10,1.11e-08,1.78e-08,9.24e-08,1.99e-07,8.95e-07,9.5e-06,0.000346,0.000499,0.0011,0.00123,0.00345	A:G,A:G,A:G,A:G,A:G,A:G,A:G,A:G,A:G,A:G,A:G,A:G,A:G,A:G,A:G,A:G,A:G,A:G,A:G,A:G,A:G,A:G,A:G
AT1G07940	A3	-	AT1G07940.1,AT1G07940.2,AT1G07940.3,AT1G07940.4	241.6655616,NA	13	1_2463255,1_2463408,1_2463316,1_2463225,1_2463673,1_2463199,1_2463179,1_2463457,1_2463535,1_2463444,1_2463284,1_2463287,1_2463405	0.0577,0.0495,0.137,0.0224,0.0303,0.0128,0.00747,0.0033,0.00513,0.00216,0.00178,0.00275,0.00215	6.64,7.47,3.04,7.07,5.44,6.17,14.2,4.37,3.8,3.71,14.1,2.82,2.99	8.14e-98,4.04e-79,1.01e-49,1.92e-31,1.93e-30,6.04e-16,2.47e-11,2.22e-09,3.79e-07,1.67e-05,5.76e-05,0.000262,0.000932	T:C,T:C,T:C,T:C,T:C,T:C,T:C,T:C,T:C,T:C,T:C,T:C,T:C
AT3G04400	RPL23C	+	AT3G04400.1,AT3G04400.2	1661.4695222,0	28	3_1168318,3_1168285,3_1167761,3_1167714,3_1167749,3_1167975,3_1168352,3_1168275,3_1167683,3_1167727,3_1168312,3_1167762,3_1168308,3_1168326,3_1167694,3_1167692,3_1167702,3_1167645,3_1167346,3_1167951,3_1168311,3_1167755,3_1167983,3_1167789,3_1167713,3_1168349,3_1167669,3_1167765	0.0342,0.0226,0.00616,0.011,0.00507,0.00735,0.0105,0.00427,0.00255,0.0035,0.0028,0.00206,0.00187,0.00303,0.00196,0.000907,0.00183,0.00249,0.00402,0.00119,9e-04,0.000771,0.000722,0.000461,0.000838,0.000924,0.000772,0.000392	8.81,6.54,5.91,4.41,5.34,3.82,6.66,4.57,5.8,3.23,4.61,3.21,13.6,14.9,2.73,4.64,2.26,3.49,4.62,3.91,15,2.97,3.28,14,2.2,13.6,3.82,3.65	3.65e-97,1.04e-69,6.71e-46,2e-34,3.67e-31,1.28e-24,3.89e-24,3.89e-17,3.25e-13,6.84e-13,3.06e-11,1.86e-10,3.82e-10,8.18e-08,3.88e-07,8.57e-07,9.1e-07,3.65e-06,4.5e-06,3.51e-05,8e-05,0.000285,0.000661,0.00106,0.00294,0.00431,0.00442,0.00604	A:G,A:G,A:G,A:G,A:G,A:G,A:G,A:G,A:G,A:G,A:G,A:G,A:G,A:G,A:G,A:G,A:G,A:G,A:G,A:G,A:G,A:G,A:G,A:G,A:G,A:G,A:G,A:G
AT1G16000	AT1G16000	+	AT1G16000.1	448.517896	5	1_5495102,1_5495137,1_5495214,1_5495159,1_5495184	0.0811,0.0907,0.027,0.00728,0.00467	6.65,5.51,15.3,3.92,12.1	6.13e-97,9.11e-75,9.73e-09,2.63e-06,0.000206	A:G,A:G,A:G,A:G,A:G
AT4G00810	RPP1B	-	AT4G00810.1,AT4G00810.2	890.2595974,NA	10	4_346444,4_346918,4_346435,4_346533,4_346361,4_346364,4_346531,4_346455,4_346020,4_346218	0.0389,0.0101,0.00646,0.00596,0.00528,0.00692,0.00223,0.00115,0.0116,0.00345	4.67,16.9,4.7,6.35,4.81,3.98,3.1,4.53,11.9,2.24	1.15e-96,8.03e-31,5.18e-25,8.13e-21,2.25e-20,2.07e-17,2.14e-06,8.93e-06,0.000581,0.000778	T:C,T:C,T:C,T:C,T:C,T:C,T:C,T:C,T:C,T:C
AT1G23290	RPL27AB	+	AT1G23290.1	708.8135808	20	1_8263206,1_8263417,1_8263407,1_8263356,1_8263339,1_8263156,1_8263240,1_8263392,1_8263219,1_8263281,1_8263404,1_8263326,1_8263193,1_8263379,1_8263338,1_8263258,1_8263272,1_8263236,1_8263170,1_8263161	0.0404,0.0358,0.0168,0.00623,0.00572,0.0056,0.00283,0.00486,0.00223,0.00201,0.00296,0.00272,0.0013,0.0019,0.00136,0.00158,0.000919,0.000611,0.00119,0.00076	4.35,7.61,4.46,5.23,15.8,3.06,4.19,4.13,4.31,5.1,4.95,3.55,4.48,14.3,13.6,3.23,4.06,13,2.32,2.84	1.33e-96,4.4e-43,1.05e-25,4.09e-18,4.16e-18,1.06e-13,3.32e-12,6.12e-09,6.2e-09,1.68e-08,1.91e-07,2.66e-07,6.81e-06,8.38e-06,2.73e-05,0.000141,0.00102,0.00346,0.00563,0.00969	A:G,A:G,A:G,A:G,A:G,A:G,A:G,A:G,A:G,A:G,A:G,A:G,A:G,A:G,A:G,A:G,A:G,A:G,A:G,A:G
AT5G64400	AT5G64400	+	AT5G64400.1,AT5G64400.2,AT5G64400.3	848.771195,2.0677454,0	18	5_25749246,5_25749639,5_25749781,5_25749703,5_25750111,5_25750127,5_25749759,5_25749780,5_25750102,5_25749476,5_25749645,5_25749282,5_25750093,5_25750116,5_25749440,5_25748934,5_25749450,5_25749434	0.044,0.0229,0.0238,0.0122,0.0115,0.0122,0.0119,0.0121,0.00944,0.00803,0.00547,0.00358,0.00572,0.00299,0.00127,0.00184,0.00161,0.00243	5.98,4.54,6.54,6.5,4.63,7.1,7,6.77,5.11,3.36,4.1,16.9,4.7,5.1,3.07,3.61,3.26,2.19	3.66e-96,3.89e-48,2.07e-44,4.81e-44,1.73e-35,1.07e-31,2.53e-30,7.44e-27,4e-24,9.82e-23,5.42e-18,3.42e-17,3.43e-17,5.5e-08,4.16e-06,2.75e-05,8.45e-05,0.0015	A:G,A:G,A:G,A:G,A:G,A:G,A:G,A:G,A:G,A:G,A:G,A:G,A:G,A:G,A:G,A:G,A:G,A:G
AT3G16640	TCTP	-	AT3G16640.1	2490.8437454	17	3_5669687,3_5670200,3_5670308,3_5669702,3_5669753,3_5670072,3_5670119,3_5669988,3_5669957,3_5670186,3_5670114,3_5670305,3_5670184,3_5669716,3_5670073,3_5670178,3_5669770	0.0509,0.121,0.0124,0.00824,0.00223,0.003,0.00331,0.00132,0.00161,0.00206,0.00101,0.00108,0.00106,0.000997,0.000761,0.000765,0.000393	2.84,2.25,4.11,4.24,4.89,3.39,3.35,4.13,4.7,2.96,3.27,3.07,2.57,3.12,2.79,2.76,3.03	5.03e-96,7.42e-64,6.14e-54,3.92e-36,1.61e-20,1.91e-19,8.35e-18,4.35e-12,1.69e-11,5.05e-11,5.54e-08,1.23e-07,7.34e-07,7.65e-05,0.000199,0.000997,0.00598	T:C,T:C,T:C,T:C,T:C,T:C,T:C,T:C,T:C,T:C,T:C,T:C,T:C,T:C,T:C,T:C,T:C
AT3G13410	AT3G13410	-	AT3G13410.1	117.0300716	6	3_4362214,3_4362828,3_4363682,3_4362150,3_4362136,3_4362965	0.0897,0.0271,0.0129,0.00335,0.00269,0.00309	8.88,2.36,4.49,4.46,4.26,2.92	9.88e-96,6.68e-17,8.7e-16,9.25e-05,0.000218,0.00736	T:C,T:C,T:C,T:C,T:C,T:C
AT5G19760	DTC	-	AT5G19760.1	227.1468822	16	5_6681799,5_6679878,5_6680990,5_6679547,5_6681854,5_6679774,5_6679866,5_6680477,5_6680969,5_6681829,5_6680741,5_6679630,5_6680469,5_6679424,5_6680954,5_6679779	0.103,0.00864,0.00434,0.00969,0.00314,0.00615,0.00332,0.00223,0.00204,0.0014,0.00238,0.0012,0.00111,0.00805,0.00186,0.00141	2.71,5.19,15.3,15.2,14.7,4.16,4.09,14.5,13.7,13.6,15,14,13.9,12.1,3.06,3.8	2.83e-95,1.88e-16,3.5e-11,1.27e-10,5.87e-08,4.37e-07,5.96e-07,1.09e-06,1.27e-05,8.82e-05,0.000694,0.000927,0.00156,0.00268,0.00293,0.00755	T:C,T:C,T:C,T:C,T:C,T:C,T:C,T:C,T:C,T:C,T:C,T:C,T:C,T:C,T:C,T:C
AT4G33250	TIF3K1	-	AT4G33250.1	114.403225	7	4_16039120,4_16039122,4_16039125,4_16039751,4_16040621,4_16039774,4_16039086	0.169,0.112,0.0271,0.0162,0.0108,0.00592,0.00489	7.17,7.06,4.72,6.09,5.21,14.8,13.6	7.85e-95,1.5e-60,2.84e-17,5.21e-16,1.7e-09,1.53e-07,0.000489	T:C,T:C,T:C,T:C,T:C,T:C,T:C
AT4G29430	RPS15AE	+	AT4G29430.1	84.2296724	10	4_14473292,4_14473379,4_14473438,4_14473143,4_14473433,4_14473344,4_14473425,4_14473139,4_14473409,4_14473111	0.255,0.133,0.131,0.0237,0.0317,0.0211,0.0221,0.00824,0.00997,0.00419	6.07,17,6.65,6.06,15.4,14.3,14.9,4.58,13.1,14.3	9.3e-95,5.86e-36,5.63e-23,3.04e-17,2.14e-09,1.38e-07,4.86e-06,8.18e-06,0.00196,0.00255	A:G,A:G,A:G,A:G,A:G,A:G,A:G,A:G,A:G,A:G
AT5G11200	RH15	+	AT5G11200.1,AT5G11200.2,AT5G11200.3	35.2429102,1.6862054,0.2996508	10	5_3570544,5_3570685,5_3570571,5_3570546,5_3570747,5_3570797,5_3570173,5_3570548,5_3568343,5_3570770	0.272,0.232,0.23,0.0329,0.0173,0.015,0.0104,0.0058,0.0173,0.00598	5.28,6.99,6.04,17,5.4,13.8,13.2,14.4,3.48,13.1	1.85e-94,3.55e-83,4.57e-67,4.12e-19,3.64e-10,5.69e-08,2.08e-07,0.000129,0.000203,0.000742	A:G,A:G,A:G,A:G,A:G,A:G,A:G,A:G,A:G,A:G
AT1G22300	GRF10	-	AT1G22300.1,AT1G22300.2,AT1G22300.3	257.820066,2.4807012,1.0078234	14	1_7878975,1_7879274,1_7878976,1_7879677,1_7879085,1_7881075,1_7880560,1_7878999,1_7879147,1_7879908,1_7879112,1_7880563,1_7879098,1_7880384	0.0927,0.025,0.0188,0.0104,0.00988,0.00406,0.00224,0.00781,0.00474,0.0021,0.00204,0.00108,0.00198,0.00251	7.58,6.87,15.6,5.32,6.21,5.29,14.3,14.2,4.94,14.3,12.3,13.7,14.3,3.27	2.8e-94,1.16e-28,1.33e-21,2.92e-19,9.65e-19,4.02e-10,1.26e-08,1.33e-08,5.32e-07,1.41e-05,9.96e-05,0.000192,0.000278,0.000393	T:C,T:C,T:C,T:C,T:C,T:C,T:C,T:C,T:C,T:C,T:C,T:C,T:C,T:C
AT4G29735	AT4G29735	-	AT4G29735.1,AT4G29735.2	395.3380132,0.3771436	13	4_14562907,4_14562922,4_14564076,4_14562921,4_14563137,4_14562926,4_14563157,4_14563155,4_14564281,4_14564153,4_14562979,4_14564100,4_14564280	0.206,0.18,0.0349,0.0988,0.0322,0.0456,0.00494,0.00397,0.00765,0.00646,0.00396,0.00224,0.00378	6.65,17.6,17,16.6,16.9,16,13.5,15.7,12.7,14.5,13.9,12.9,13.7	3.04e-94,1.42e-72,1.63e-55,2.12e-55,1.43e-43,2.89e-21,5.1e-09,8.24e-07,1.05e-06,1.9e-05,4.13e-05,0.00118,0.00262	T:C,T:C,T:C,T:C,T:C,T:C,T:C,T:C,T:C,T:C,T:C,T:C,T:C
AT1G08360	RPL10AA	+	AT1G08360.1	325.3814948	26	1_2637660,1_2637109,1_2637247,1_2637494,1_2637624,1_2637739,1_2637163,1_2637495,1_2636755,1_2637565,1_2636674,1_2637522,1_2637462,1_2636787,1_2637654,1_2637627,1_2637659,1_2637160,1_2637490,1_2637538,1_2637705,1_2637807,1_2637493,1_2637480,1_2636675,1_2636804	0.0896,0.0572,0.0378,0.0378,0.0365,0.0245,0.0081,0.0147,0.00946,0.0114,0.0076,0.00679,0.005,0.00408,0.00493,0.00599,0.00399,0.00231,0.00363,0.00394,0.00285,0.00613,0.00186,0.00132,0.00112,0.00112	7.73,5.42,6.65,6.51,18.9,15.9,5.67,5.06,5.37,5.12,16.1,4.05,4.37,4.62,5.46,5.53,15.7,14.5,5.12,4.17,14.7,13.9,4.24,3.84,11.9,2.46	3.95e-94,3.23e-78,2.36e-73,1.31e-63,1.2e-59,1.57e-32,6.82e-25,6.97e-25,1.71e-20,8.49e-18,3.74e-17,2.62e-14,8.18e-14,7.53e-12,9.04e-11,1.83e-10,3.09e-10,1.43e-08,3.02e-08,6.91e-08,2.43e-06,9.32e-06,0.00015,0.00245,0.00411,0.00969	A:G,A:G,A:G,A:G,A:G,A:G,A:G,A:G,A:G,A:G,A:G,A:G,A:G,A:G,A:G,A:G,A:G,A:G,A:G,A:G,A:G,A:G,A:G,A:G,A:G,A:G
AT1G65930	CICDH	+	AT1G65930.1	318.586466	16	1_24541861,1_24541460,1_24540118,1_24541675,1_24541605,1_24541462,1_24541847,1_24541090,1_24541474,1_24541874,1_24541872,1_24541626,1_24541870,1_24541883,1_24541674,1_24540901	0.0648,0.0181,0.0105,0.00701,0.0053,0.00483,0.00632,0.00616,0.0051,0.00332,0.00285,0.00174,0.00293,0.00131,0.00136,0.00132	7.11,4.7,3.57,4.76,5.64,4.9,5.3,16,4.02,4.36,5.16,4.19,3.62,13.8,3.29,2.55	1.39e-93,3.41e-70,8.05e-28,3.01e-23,3.74e-23,4.36e-18,1.29e-17,5.17e-14,1.14e-11,9.33e-09,9e-08,1.02e-07,3.11e-07,0.000143,0.000419,0.00883	A:G,A:G,A:G,A:G,A:G,A:G,A:G,A:G,A:G,A:G,A:G,A:G,A:G,A:G,A:G,A:G
AT1G07770	RPS15AA	-	AT1G07770.1,AT1G07770.2,AT1G07770.3	931.0636142,NA	34	1_2408763,1_2408938,1_2408766,1_2408714,1_2408457,1_2408450,1_2408686,1_2408764,1_2408435,1_2408451,1_2408393,1_2408490,1_2409067,1_2408963,1_2409486,1_2408461,1_2409010,1_2408464,1_2409073,1_2408749,1_2408436,1_2409481,1_2409043,1_2408744,1_2409059,1_2409040,1_2409060,1_2408773,1_2408454,1_2408287,1_2409072,1_2408724,1_2409019,1_2408682	0.0745,0.106,0.23,0.0181,0.0147,0.0161,0.0134,0.0113,0.0106,0.0121,0.0137,0.00696,0.00727,0.00429,0.00711,0.00271,0.00203,0.00255,0.0031,0.00185,0.00208,0.00619,0.00222,0.00209,0.0029,0.00119,0.00148,0.00142,0.00248,0.00622,0.00194,0.00097,0.00089,0.000936	5.3,3.77,4.89,7.95,17.5,17.1,5.14,5.59,5.22,5.74,6.57,15.9,6.01,6.06,5.8,14.7,5.11,14.6,15.3,5.04,13.7,2.67,4.81,13.4,2.87,13.5,13.8,3.62,14.5,12.5,4.04,3.89,3.87,3.82	5.33e-93,9.87e-91,4.69e-72,2.9e-58,5.58e-49,7.93e-34,1.03e-33,3.01e-32,4.99e-26,2.42e-25,1.9e-22,1.32e-19,3.42e-18,1.15e-16,1.04e-14,5.73e-11,7.46e-09,8.14e-09,1.64e-08,3.13e-08,3.18e-08,8.29e-08,5.05e-07,2.69e-06,3.48e-06,1.61e-05,1.86e-05,4.88e-05,0.000128,0.000304,0.000712,0.000859,0.00168,0.00286	T:C,T:C,T:C,T:C,T:C,T:C,T:C,T:C,T:C,T:C,T:C,T:C,T:C,T:C,T:C,T:C,T:C,T:C,T:C,T:C,T:C,T:C,T:C,T:C,T:C,T:C,T:C,T:C,T:C,T:C,T:C,T:C,T:C,T:C
AT1G26630	ELF5A-2	+	AT1G26630.1,AT1G26630.2	1113.075961,1.3742368	16	1_9206483,1_9206697,1_9206548,1_9207019,1_9207094,1_9206041,1_9207249,1_9206700,1_9206860,1_9207250,1_9206040,1_9205965,1_9207076,1_9207080,1_9206086,1_9206521	0.0591,0.0281,0.00812,0.00719,0.00645,0.00231,0.0108,0.00319,0.00343,0.0109,0.00228,0.00301,0.000541,0.00117,0.000998,0.000455	3.66,3.52,5.2,4.65,17.4,16.2,5.92,3.49,4.2,5.78,16.3,14.1,13.9,2.31,1.67,14.2	1.08e-92,1.27e-47,5.02e-34,1.37e-23,1.41e-20,1.68e-16,2.02e-15,3.17e-15,1.92e-14,2.46e-13,9.12e-12,1.88e-07,0.00185,0.00196,0.00603,0.00629	A:G,A:G,A:G,A:G,A:G,A:G,A:G,A:G,A:G,A:G,A:G,A:G,A:G,A:G,A:G,A:G
AT3G27240	CYC11	-	AT3G27240.1	141.7194514	19	3_10056052,3_10056032,3_10057096,3_10057903,3_10055997,3_10056143,3_10055983,3_10056571,3_10056194,3_10056178,3_10058337,3_10057268,3_10056131,3_10055984,3_10056838,3_10057082,3_10057904,3_10056572,3_10057966	0.101,0.035,0.0163,0.0343,0.018,0.00851,0.0139,0.00556,0.0038,0.00276,0.00615,0.00408,0.0024,0.00489,0.00697,0.00408,0.00199,0.00158,0.00156	18.1,17,4.69,3.52,16.1,6.12,5.79,15.8,15.6,4.68,3,4.58,12.6,13.6,2.87,3.6,14.1,3.8,13.8	1.83e-92,3.97e-34,3.25e-23,7.15e-23,2.72e-20,2.98e-17,2.34e-13,1.97e-10,4.26e-08,3.61e-06,7.42e-06,1e-05,1.73e-05,4.26e-05,6.21e-05,7.37e-05,0.000895,0.0038,0.00593	T:C,T:C,T:C,T:C,T:C,T:C,T:C,T:C,T:C,T:C,T:C,T:C,T:C,T:C,T:C,T:C,T:C,T:C,T:C
AT1G79530	GAPCP1	-	AT1G79530.1	125.5930292	34	1_29916247,1_29918218,1_29917296,1_29916545,1_29918337,1_29916756,1_29916267,1_29917780,1_29916998,1_29916585,1_29916440,1_29916125,1_29916789,1_29916999,1_29916391,1_29916040,1_29916986,1_29918369,1_29917004,1_29917768,1_29916172,1_29915991,1_29916445,1_29916168,1_29917539,1_29919051,1_29918217,1_29916589,1_29916418,1_29918366,1_29918545,1_29917035,1_29916220,1_29917549	0.119,0.0274,0.0146,0.0257,0.0138,0.008,0.00498,0.00948,0.00502,0.00635,0.00357,0.00794,0.0031,0.00371,0.0081,0.00748,0.00367,0.00299,0.00299,0.00408,0.00252,0.0198,0.00201,0.00232,0.0026,0.00192,0.00221,0.00152,0.00288,0.00286,0.00111,0.00324,0.00354,0.00313	6.61,5.06,6.44,4.43,5.04,16.2,15.1,4.07,5.25,3.95,15.5,5.13,14.9,4.88,3.3,14.8,4.64,12.7,14.8,13.8,13.7,12.8,3.93,13.1,12.6,12.5,12.2,12.9,2.9,3.16,13.2,3.27,2.41,2.25	9.06e-92,2.12e-33,4.36e-21,1.26e-18,1.99e-15,7.46e-13,8.13e-12,2.41e-11,1.41e-09,1.46e-09,8.46e-09,3.85e-08,1.09e-07,3.12e-07,6.84e-07,1.68e-06,2.84e-06,7.35e-06,9.69e-06,1.72e-05,8.03e-05,0.000239,0.000325,0.00035,0.000414,0.000415,0.00119,0.0012,0.00206,0.003,0.00433,0.00556,0.00741,0.0093	T:C,T:C,T:C,T:C,T:C,T:C,T:C,T:C,T:C,T:C,T:C,T:C,T:C,T:C,T:C,T:C,T:C,T:C,T:C,T:C,T:C,T:C,T:C,T:C,T:C,T:C,T:C,T:C,T:C,T:C,T:C,T:C,T:C,T:C
AT5G23540	RPN11	+	AT5G23540.1,AT5G23540.2	103.0601824,1.850229	3	5_7939338,5_7937785,5_7939278	0.11,0.00589,0.00335	5.66,14.3,4.1	1.41e-91,1.71e-06,0.000868	A:G,A:G,A:G
AT2G47610	RPL7AA	+	AT2G47610.1	315.7597516	28	2_19531124,2_19530873,2_19531465,2_19530211,2_19531098,2_19531408,2_19530720,2_19530793,2_19531376,2_19530981,2_19531289,2_19531147,2_19531346,2_19531363,2_19530818,2_19530349,2_19531300,2_19531131,2_19530418,2_19530407,2_19530803,2_19531143,2_19530751,2_19531481,2_19530541,2_19530780,2_19531334,2_19531358	0.024,0.0726,0.0508,0.0277,0.00635,0.0102,0.00473,0.0056,0.00682,0.00612,0.00472,0.00365,0.00568,0.0044,0.00445,0.00351,0.0047,0.00171,0.00286,0.00263,0.00244,0.00122,0.00234,0.00206,0.00242,0.000912,0.00113,0.00218	5.92,7.63,19.4,3.98,16.4,15.2,15.8,6.03,16.1,5.93,5.82,5.81,5.77,5.59,5.49,4.53,14,14.5,5.03,2.74,15,4.33,4.72,12.9,1.96,12.1,13.9,2.63	1.51e-91,1.96e-88,4.37e-64,8.89e-49,3.62e-23,1.59e-18,5.84e-18,4.92e-17,1.9e-15,5.89e-15,4.26e-14,1.2e-13,4.56e-13,4.43e-12,1.25e-11,1.27e-10,3.14e-09,4.16e-08,6.57e-08,8.49e-08,6.43e-07,9.67e-05,0.000129,0.000714,0.000894,0.00163,0.00178,0.00649	A:G,A:G,A:G,A:G,A:G,A:G,A:G,A:G,A:G,A:G,A:G,A:G,A:G,A:G,A:G,A:G,A:G,A:G,A:G,A:G,A:G,A:G,A:G,A:G,A:G,A:G,A:G,A:G
AT4G09320	NDPK1	+	AT4G09320.1	890.734093	11	4_5924187,4_5924337,4_5924286,4_5924265,4_5924173,4_5924361,4_5923702,4_5924107,4_5924387,4_5924133,4_5924235	0.0339,0.0292,0.0212,0.0115,0.00459,0.00369,0.00195,0.00157,0.00168,0.000806,0.000733	4.52,16.7,4.56,4.17,4.54,13.7,3.96,2.43,14,3.86,3.86	1.81e-91,7.57e-55,6.21e-36,2.34e-35,3.37e-22,9.8e-09,4.83e-07,1.16e-05,0.00139,0.00233,0.00305	A:G,A:G,A:G,A:G,A:G,A:G,A:G,A:G,A:G,A:G,A:G
AT2G34470	UREG	-	AT2G34470.1,AT2G34470.2	57.7121576,1.8308696	15	2_14531351,2_14531171,2_14531380,2_14531393,2_14532208,2_14532395,2_14531381,2_14531392,2_14531356,2_14530957,2_14530869,2_14532146,2_14532116,2_14531364,2_14532203	0.165,0.0729,0.261,0.395,0.0438,0.079,0.0782,0.0365,0.0163,0.02,0.0127,0.0047,0.00469,0.00397,0.0036	8.83,8.05,4.61,2.77,5.61,16.1,18.2,6.51,16,4.76,14.2,14,4.39,13.9,13.6	6.32e-91,8.69e-63,6.62e-59,6.9e-58,8.41e-38,8.5e-32,1.62e-31,8.01e-22,1.21e-12,1.27e-11,2.92e-06,2.54e-05,3.4e-05,0.000469,0.000517	T:C,T:C,T:C,T:C,T:C,T:C,T:C,T:C,T:C,T:C,T:C,T:C,T:C,T:C,T:C
AT1G27435	AT1G27435	-	AT1G27435.1	527.6298652	20	1_9527888,1_9527853,1_9527845,1_9527940,1_9527944,1_9527911,1_9527883,1_9527844,1_9527884,1_9527934,1_9527879,1_9527882,1_9527917,1_9528770,1_9528767,1_9527898,1_9527880,1_9527885,1_9527912,1_9527737	0.218,0.0569,0.0891,0.0209,0.032,0.0288,0.0195,0.0221,0.0151,0.00701,0.00972,0.00754,0.00517,0.00597,0.00363,0.00537,0.00591,0.0051,0.00447,0.0174	5.84,16.4,7.41,15.7,6.61,16.2,16.2,15.4,15.8,14.1,15.2,14.8,13.7,12.9,13.1,14.4,14.5,14.2,4.05,12.5	7.14e-91,1.94e-42,1.74e-37,1.3e-23,2.15e-22,9.83e-21,1.15e-14,1.73e-14,5.29e-12,1.94e-08,2.59e-08,2.05e-06,6.12e-06,7.45e-06,2.83e-05,0.000153,0.00023,0.000398,0.000859,0.0013	T:C,T:C,T:C,T:C,T:C,T:C,T:C,T:C,T:C,T:C,T:C,T:C,T:C,T:C,T:C,T:C,T:C,T:C,T:C,T:C
AT5G35590	PAA1	-	AT5G35590.1	91.8857704	11	5_13765403,5_13765374,5_13765404,5_13767171,5_13765409,5_13767188,5_13765438,5_13765359,5_13767533,5_13767771,5_13765401	0.217,0.0392,0.011,0.0144,0.0091,0.00454,0.00416,0.00658,0.00174,0.00743,0.00325	8.89,16.6,15.3,15.6,14.5,14.3,13.3,13.9,14.2,3.68,3.52	1.52e-90,1.32e-41,1.81e-12,3.8e-11,2.89e-10,8.81e-06,1.16e-05,0.000122,0.00117,0.00385,0.0075	T:C,T:C,T:C,T:C,T:C,T:C,T:C,T:C,T:C,T:C,T:C
AT5G63840	PSL5	+	AT5G63840.2,AT5G63840.1	12.6293464,5.3503976	15	5_25548639,5_25548613,5_25546609,5_25545695,5_25548276,5_25547955,5_25548703,5_25548614,5_25548910,5_25547089,5_25548734,5_25548405,5_25548858,5_25547096,5_25547301	0.301,0.247,0.0692,0.0948,0.0828,0.0238,0.0163,0.0146,0.0169,0.0138,0.0151,0.0118,0.0102,0.0136,0.00796	3.67,5.7,6.7,3.82,3.13,5.62,14,13.8,14.6,14.1,4.71,4.53,13.3,13.4,12.7	2.51e-90,1.73e-68,7.2e-26,2.83e-22,3.12e-15,1.8e-12,1.28e-09,2.2e-07,3.1e-07,5.34e-06,1.13e-05,2.49e-05,4.17e-05,8.36e-05,0.000466	A:G,A:G,A:G,A:G,A:G,A:G,A:G,A:G,A:G,A:G,A:G,A:G,A:G,A:G,A:G
AT1G04480	RPL23C	+	AT1G04480.1	620.270194	21	1_1216367,1_1216452,1_1217225,1_1217263,1_1216477,1_1216368,1_1216451,1_1216482,1_1217256,1_1217269,1_1216453,1_1216429,1_1217173,1_1216454,1_1216435,1_1216264,1_1217268,1_1217307,1_1217203,1_1217265,1_1216427	0.0389,0.0537,0.0665,0.0579,0.00896,0.00678,0.00528,0.00879,0.0143,0.0113,0.00194,0.0018,0.00545,0.00356,0.00159,0.00264,0.00402,0.00388,0.00199,0.00287,0.000796	8.69,5.34,6.26,17.8,16.4,16.4,5.2,4.15,5.75,15.4,5.03,4.83,4.09,2.14,3.55,12.5,13.9,13.3,4.08,13.8,13.3	4.52e-90,1.13e-86,1.76e-53,1.18e-48,2.38e-37,1.19e-29,9.9e-18,5.6e-14,4.07e-12,9.24e-12,2.82e-08,3.92e-07,5.17e-07,7.23e-07,7.4e-05,0.000162,0.000243,0.000488,0.00066,0.00132,0.0015	A:G,A:G,A:G,A:G,A:G,A:G,A:G,A:G,A:G,A:G,A:G,A:G,A:G,A:G,A:G,A:G,A:G,A:G,A:G,A:G,A:G
AT3G62290	ARFA1E	+	AT3G62290.1,AT3G62290.2,AT3G62290.3	940.0343038,NA	11	3_23053061,3_23053043,3_23052990,3_23053221,3_23053408,3_23053072,3_23053045,3_23052968,3_23052814,3_23053242,3_23052775	0.0832,0.00391,0.00409,0.00376,0.00269,0.00321,0.00115,0.00203,0.00189,0.00109,0.000594	3.11,5.21,3.97,3.48,4.41,2.21,3.84,2.51,3.31,2.34,14.4	6.93e-90,7.41e-27,4.17e-18,8.11e-17,1.9e-08,7.63e-08,1.58e-07,3.96e-07,0.000112,0.000489,0.00257	A:G,A:G,A:G,A:G,A:G,A:G,A:G,A:G,A:G,A:G,A:G
AT5G43460	AT5G43460	+	AT5G43460.1,AT5G43460.2	133.4405754,NA	9	5_17461452,5_17460992,5_17461464,5_17461483,5_17461449,5_17461609,5_17460795,5_17460031,5_17461001	0.218,0.0194,0.0242,0.0217,0.0103,0.0267,0.00497,0.00428,0.00354	6.31,16.2,16.5,14.3,15.3,5.09,14.1,13.9,4.03	1.21e-89,2.28e-23,3.34e-14,6.45e-12,2.21e-08,4.2e-08,1.24e-06,0.000116,0.000975	A:G,A:G,A:G,A:G,A:G,A:G,A:G,A:G,A:G
AT5G57300	COQ5	-	AT5G57300.1,AT5G57300.2,AT5G57300.3,AT5G57300.4	26.06906,NA	4	5_23208751,5_23208712,5_23208766,5_23208705	0.253,0.214,0.117,0.0123	8.74,17.9,16.8,13.5	1.1e-88,8.16e-75,2.41e-33,1.04e-05	T:C,T:C,T:C,T:C
AT1G51510	Y14	-	AT1G51510.1	105.1713874	8	1_19104077,1_19104562,1_19103378,1_19103028,1_19103379,1_19103076,1_19103005,1_19104040	0.299,0.0315,0.0635,0.0843,0.0336,0.0387,0.00914,0.00382	4.21,7.38,18,16.3,17,15.2,13.1,13.2	2.73e-88,6.14e-45,4.45e-34,1.47e-31,9.54e-24,3.08e-22,2.55e-06,0.000155	T:C,T:C,T:C,T:C,T:C,T:C,T:C,T:C
AT2G31490	AT2G31490	+	AT2G31490.1	1728.3966854	16	2_13413056,2_13412205,2_13412088,2_13413069,2_13413050,2_13413055,2_13412058,2_13413014,2_13412975,2_13412992,2_13413031,2_13413049,2_13412963,2_13412052,2_13413061,2_13413114	0.142,0.0218,0.0156,0.0159,0.00826,0.0124,0.012,0.00772,0.00671,0.00746,0.00429,0.00331,0.0018,0.00597,0.00269,0.00758	7.59,4.17,6.86,5.24,14.3,17.4,14.8,5.84,3.05,5.56,4.01,15,4.43,3.63,13.3,12.8	7.16e-88,2.36e-44,2.43e-29,1.03e-16,2.29e-16,2.46e-15,3.04e-14,5.25e-14,1.38e-10,2.62e-09,5.21e-07,9.47e-06,2.95e-05,3.23e-05,7.6e-05,0.000513	A:G,A:G,A:G,A:G,A:G,A:G,A:G,A:G,A:G,A:G,A:G,A:G,A:G,A:G,A:G,A:G
AT1G18080	RACK1A	+	AT1G18080.1	285.3865064	27	1_6223089,1_6223121,1_6223875,1_6223858,1_6223205,1_6222486,1_6223023,1_6223903,1_6222795,1_6223168,1_6223169,1_6223178,1_6223851,1_6222828,1_6223061,1_6223013,1_6222464,1_6223142,1_6222680,1_6222820,1_6222805,1_6223154,1_6223958,1_6222930,1_6223007,1_6222784,1_6223822	0.0955,0.0242,0.0184,0.0173,0.014,0.0116,0.00518,0.00993,0.00538,0.00323,0.00606,0.00711,0.00616,0.00366,0.00124,0.00313,0.00151,0.00111,0.00315,0.00219,0.00151,0.00103,0.00192,0.00176,0.000937,0.00232,0.00095	3.84,4.81,17.5,7.49,6.01,3.9,4.6,6.09,14.6,5.65,2.58,4.76,3.86,5.03,13.6,2.36,14.1,4.28,3.38,3.3,14.2,3.82,14.7,3.21,13.6,2.53,3.61	1.44e-87,8.77e-67,1.01e-48,1.83e-43,1.93e-30,2.62e-22,7.09e-16,6.15e-15,6.88e-13,9.54e-13,1.03e-12,7.98e-12,1.16e-11,8.74e-07,2.08e-05,2.68e-05,2.86e-05,0.000129,0.000407,0.000555,0.000561,0.000804,0.00121,0.00122,0.00132,0.00359,0.00824	A:G,A:G,A:G,A:G,A:G,A:G,A:G,A:G,A:G,A:G,A:G,A:G,A:G,A:G,A:G,A:G,A:G,A:G,A:G,A:G,A:G,A:G,A:G,A:G,A:G,A:G,A:G
AT1G16890	UBC36	-	AT1G16890.2,AT1G16890.3,AT1G16890.1	154.9839272,0.109822,0	3	1_5776442,1_5776443,1_5777433	0.333,0.0469,0.00285	8.78,16,15.2	3.07e-87,7.75e-15,3.21e-05	T:C,T:C,T:C
AT2G20360	AT2G20360	+	AT2G20360.1	103.7568672	27	2_8789117,2_8789073,2_8788785,2_8788994,2_8788262,2_8788483,2_8786093,2_8789072,2_8788640,2_8786894,2_8787297,2_8788188,2_8786145,2_8788206,2_8788197,2_8789251,2_8789277,2_8789174,2_8787296,2_8789160,2_8789048,2_8787760,2_8788784,2_8787780,2_8789148,2_8787818,2_8788603	0.255,0.0778,0.0524,0.0334,0.0231,0.0126,0.0233,0.0117,0.00783,0.00483,0.00493,0.00548,0.0039,0.00244,0.00225,0.00843,0.0117,0.00521,0.00317,0.00435,0.00244,0.00318,0.00141,0.00202,0.00421,0.00201,0.00222	7.72,8.48,4.49,5.42,5.59,15.5,6,14.9,4.56,4.97,13.4,3.9,13.7,14.5,14.4,13,4.4,4.27,4.08,4.16,12.7,4.01,13.8,13.2,4,3.89,3.86	3.26e-87,9.02e-79,2.13e-47,1.44e-28,2.55e-24,6.36e-21,1.39e-16,1.15e-14,2.07e-12,4.33e-08,1.79e-06,2.23e-06,7.35e-06,2.38e-05,4.54e-05,5.29e-05,0.000139,0.000247,0.000417,0.000515,0.000582,0.000753,0.000862,0.00125,0.00146,0.00162,0.00296	A:G,A:G,A:G,A:G,A:G,A:G,A:G,A:G,A:G,A:G,A:G,A:G,A:G,A:G,A:G,A:G,A:G,A:G,A:G,A:G,A:G,A:G,A:G,A:G,A:G,A:G,A:G
AT2G42210	OEP163	+	AT2G42210.2,AT2G42210.1	253.121371,0	13	2_17591619,2_17591548,2_17591546,2_17591571,2_17591490,2_17591557,2_17591526,2_17590810,2_17590639,2_17591570,2_17590704,2_17591627,2_17590671	0.0963,0.0496,0.0195,0.0257,0.0118,0.00718,0.00461,0.00315,0.00722,0.00459,0.00217,0.0027,0.00238	7.64,19.1,5.58,6.14,5.04,16.6,4.32,3.96,3.82,14.1,14.4,13.4,13.1	3.89e-87,3.75e-82,2.95e-34,1.21e-33,2.5e-14,1.01e-12,1.21e-08,1.86e-06,5.5e-06,1.44e-05,7.38e-05,0.000844,0.0037	A:G,A:G,A:G,A:G,A:G,A:G,A:G,A:G,A:G,A:G,A:G,A:G,A:G
AT5G58110	AT5G58110	+	AT5G58110.1	111.4022692	18	5_23515865,5_23515556,5_23516180,5_23516355,5_23516360,5_23516523,5_23515870,5_23515575,5_23516460,5_23516463,5_23516479,5_23515555,5_23515719,5_23515432,5_23515401,5_23515718,5_23515689,5_23516574	0.141,0.0368,0.0225,0.028,0.048,0.0711,0.0335,0.0153,0.0228,0.0169,0.022,0.00384,0.00564,0.00424,0.0025,0.00331,0.00263,0.0225	8.74,17.5,15.8,16.1,5.35,16.1,4.72,16.2,5.17,4.72,14.3,13.8,14.3,13.9,13.1,4.27,12.6,12.9	1.45e-86,1.01e-50,2.88e-33,3.61e-31,3.6e-28,1.23e-25,9.72e-24,1.52e-19,9.38e-17,8.12e-12,2.64e-11,8.3e-06,1.43e-05,1.55e-05,0.000384,0.000397,0.000585,0.000959	A:G,A:G,A:G,A:G,A:G,A:G,A:G,A:G,A:G,A:G,A:G,A:G,A:G,A:G,A:G,A:G,A:G,A:G
AT5G47930	RPS27D	-	AT5G47930.1	2292.752694	19	5_19406499,5_19406359,5_19406372,5_19406430,5_19407012,5_19406518,5_19406417,5_19406519,5_19406309,5_19406427,5_19407188,5_19406336,5_19406450,5_19406312,5_19407031,5_19406453,5_19406318,5_19406507,5_19407185	0.0332,0.0613,0.0189,0.0152,0.00501,0.00611,0.00511,0.0036,0.0101,0.00317,0.00223,0.00643,0.00378,0.00904,0.00317,0.00101,0.00358,0.000718,0.000966	6.85,8.07,17.6,4.51,17.4,16.2,4.9,15.4,15.2,13.5,4.2,13.4,4.03,5.1,3.48,13.7,13.1,3.93,2.65	4.37e-86,2.02e-58,1.82e-37,1.71e-23,1.43e-22,1.85e-18,2.68e-14,1.77e-13,8.97e-12,9.92e-11,6.26e-10,6.43e-10,1.35e-09,5.8e-08,1.34e-07,0.000135,0.00111,0.00128,0.00143	T:C,T:C,T:C,T:C,T:C,T:C,T:C,T:C,T:C,T:C,T:C,T:C,T:C,T:C,T:C,T:C,T:C,T:C,T:C
AT5G61170	RPS19C	+	AT5G61170.1	682.4980102	10	5_24612182,5_24611213,5_24612222,5_24612282,5_24611719,5_24611519,5_24611581,5_24611240,5_24612283,5_24611671	0.0627,0.00293,0.00424,0.00381,0.00135,0.000728,0.000768,0.00103,0.0019,0.00103	6.5,4.38,3.79,13.2,3.36,13.1,12.8,2.73,12.8,2.83	6.32e-86,8.89e-11,1.34e-07,5.75e-07,9.73e-05,0.00045,0.000569,0.00134,0.00352,0.00577	A:G,A:G,A:G,A:G,A:G,A:G,A:G,A:G,A:G,A:G
AT3G07568	AT3G07568	-	AT3G07568.1	275.3338272	6	3_2416466,3_2417650,3_2416467,3_2416458,3_2417725,3_2417511	0.222,0.0227,0.0479,0.0164,0.0157,0.0124	19.3,5.36,16.7,15.8,5.09,4	6.76e-86,4.3e-21,5.69e-17,5.14e-10,1.02e-08,1.56e-07	T:C,T:C,T:C,T:C,T:C,T:C
AT1G34030	RPS18A	-	AT1G34030.1	348.5774306	23	1_12370528,1_12371099,1_12370668,1_12370637,1_12370245,1_12371100,1_12370146,1_12370216,1_12370266,1_12371104,1_12370109,1_12371089,1_12370272,1_12371134,1_12370529,1_12371466,1_12370628,1_12371516,1_12371060,1_12371077,1_12371472,1_12371133,1_12371490	0.0353,0.0495,0.0172,0.0214,0.0572,0.0166,0.0641,0.0366,0.019,0.0105,0.0909,0.00506,0.00764,0.00475,0.00387,0.00443,0.00245,0.00714,0.00171,0.0014,0.00195,0.00246,0.00253	6.42,6.16,16.4,17.7,6.26,6.13,7.06,6.84,6.15,16.6,4.32,16,5.28,14.8,5.24,15.4,14.6,12.5,14,13.1,12.1,2.76,2.86	6.96e-86,1.07e-70,2.74e-46,2.33e-35,1.64e-34,1.72e-34,8.82e-34,1.41e-28,4.48e-16,1.27e-12,2.32e-12,2.59e-12,2.26e-09,1.62e-08,1.69e-08,6.75e-08,8.71e-06,4.54e-05,0.000122,0.00243,0.00326,0.00445,0.00787	T:C,T:C,T:C,T:C,T:C,T:C,T:C,T:C,T:C,T:C,T:C,T:C,T:C,T:C,T:C,T:C,T:C,T:C,T:C,T:C,T:C,T:C,T:C
AT5G04590	SIR	+	AT5G04590.1	70.4313286	4	5_1322036,5_1322024,5_1319518,5_1320719	0.111,0.0141,0.00919,0.00288	4.32,4.56,3.58,12.6	1.65e-85,5.46e-15,5.3e-13,0.00204	A:G,A:G,A:G,A:G
AT5G58420	RPS4D	+	AT5G58420.1	277.3302244	22	5_23620492,5_23620216,5_23620576,5_23620895,5_23620884,5_23620724,5_23620747,5_23620325,5_23620481,5_23620177,5_23620628,5_23620610,5_23620921,5_23620949,5_23620181,5_23620849,5_23620768,5_23620166,5_23620209,5_23620674,5_23620589,5_23620717	0.0472,0.035,0.0429,0.0218,0.0223,0.00845,0.00522,0.00832,0.0034,0.0015,0.00621,0.00193,0.00447,0.00357,0.00137,0.00244,0.00393,0.00141,0.000813,0.00188,0.00171,0.00119	8.59,4.86,5.74,16.4,16.4,4.11,5.77,4.91,3.66,14.3,2.27,13.3,4.36,13.1,3.11,4.05,3.37,2.39,12.9,2.56,2.95,3.67	2.21e-85,1.15e-57,1.89e-50,7.33e-35,1.34e-26,2.33e-18,4.78e-14,6.66e-14,1.29e-07,2.3e-05,0.000132,0.000143,0.000212,0.00052,0.000699,0.000952,0.00102,0.00284,0.00468,0.00632,0.00665,0.00704	A:G,A:G,A:G,A:G,A:G,A:G,A:G,A:G,A:G,A:G,A:G,A:G,A:G,A:G,A:G,A:G,A:G,A:G,A:G,A:G,A:G,A:G
AT4G00100	RPS13B	+	AT4G00100.1	524.681537	27	4_38139,4_38150,4_37342,4_37145,4_37125,4_37306,4_37560,4_37816,4_37276,4_37541,4_37559,4_38147,4_37537,4_37275,4_37741,4_37663,4_37776,4_37734,4_37807,4_37729,4_38122,4_37543,4_37308,4_37735,4_37750,4_37162,4_37540	0.0505,0.0359,0.0347,0.0578,0.06,0.00548,0.00552,0.00948,0.0201,0.0118,0.00448,0.00644,0.00619,0.00833,0.00429,0.00449,0.00675,0.00222,0.00324,0.00216,0.00261,0.0012,0.0031,0.00213,0.00155,0.00145,0.00167	18.9,19,4.64,4.61,15.6,16,6.25,6.67,3.71,17.2,15.5,16,16.3,5.75,15.8,4.88,4.74,14.8,3.81,14.4,15.1,13.6,3.91,2.86,3.98,14.1,4.15	6.05e-85,4.2e-68,2.06e-54,1.68e-39,6.37e-26,1.14e-21,1.02e-19,3.61e-19,1.78e-18,7.01e-18,2.46e-15,3.3e-15,1.04e-14,1.92e-13,5.68e-13,9.99e-13,2.81e-12,9.51e-09,2.35e-08,1.7e-07,2.5e-07,4.31e-05,4.35e-05,0.00136,0.00222,0.00297,0.00765	A:G,A:G,A:G,A:G,A:G,A:G,A:G,A:G,A:G,A:G,A:G,A:G,A:G,A:G,A:G,A:G,A:G,A:G,A:G,A:G,A:G,A:G,A:G,A:G,A:G,A:G,A:G
AT2G40316	AT2G40316	+	AT2G40316.1,AT2G40316.3,AT2G40316.2	11.9284914,1.3932594,0.0540112	3	2_16838691,2_16838128,2_16838824	0.314,0.0604,0.0347	5.32,14.4,13.7	1.65e-84,5.15e-09,9.52e-05	A:G,A:G,A:G
AT5G09650	PPA6	-	AT5G09650.1	63.2674104	13	5_2993026,5_2992963,5_2991786,5_2991833,5_2991347,5_2991832,5_2993146,5_2991552,5_2992985,5_2993046,5_2993151,5_2993141,5_2991369	0.097,0.0132,0.0146,0.0166,0.0107,0.0094,0.0149,0.00905,0.00314,0.00437,0.0109,0.0073,0.00596	4.76,6.14,5.37,4.18,13.3,4.54,14.1,3.45,13.4,3.9,11.7,12.5,3.39	5.08e-84,1.34e-18,3.43e-09,2.14e-07,1.08e-06,4.32e-05,8.03e-05,0.000402,0.00161,0.00311,0.0039,0.00674,0.00842	T:C,T:C,T:C,T:C,T:C,T:C,T:C,T:C,T:C,T:C,T:C,T:C,T:C
AT3G03960	CCT8	+	AT3G03960.1	50.338057	3	3_1027010,3_1024998,3_1026901	0.081,0.0273,0.00327	6.13,4.28,2.9	8.43e-84,8.87e-14,0.00713	A:G,A:G,A:G
AT1G52300	RPL37B	-	AT1G52300.1	2416.842107	19	1_19475235,1_19475201,1_19475214,1_19475372,1_19475148,1_19476017,1_19475194,1_19475236,1_19475420,1_19475920,1_19475147,1_19476010,1_19475162,1_19475452,1_19475453,1_19475238,1_19476032,1_19475959,1_19475437	0.0355,0.0165,0.00769,0.00924,0.00908,0.0049,0.00687,0.00331,0.00296,0.00238,0.00576,0.0015,0.00583,0.000578,0.00099,0.00112,0.00148,0.000428,0.000403	6.85,5.72,18,4.71,16.5,3.14,5.15,4.87,3.92,4.32,15.8,3.33,4.51,4.06,2.02,3.14,2.61,13.8,11.9	1.24e-83,8.47e-51,3.31e-28,4.51e-28,1.78e-19,8.07e-16,1.95e-15,5.66e-14,4.95e-12,5.34e-12,6.89e-12,5.17e-06,5.92e-05,0.000807,0.001,0.00139,0.00141,0.00146,0.00318	T:C,T:C,T:C,T:C,T:C,T:C,T:C,T:C,T:C,T:C,T:C,T:C,T:C,T:C,T:C,T:C,T:C,T:C,T:C
AT1G16700	AT1G16700	+	AT1G16700.1	179.4627758	10	1_5711827,1_5711825,1_5711826,1_5711831,1_5711819,1_5711079,1_5711274,1_5710838,1_5711633,1_5710907	0.227,0.126,0.0547,0.0321,0.025,0.00426,0.00721,0.00271,0.00249,0.00199	6.57,17.6,15.8,15.5,4.74,4.74,3.75,12.7,3.01,3.63	1.72e-83,8.87e-48,1.65e-29,1.9e-18,8.63e-12,2.58e-06,3.25e-06,5.71e-05,0.00705,0.00798	A:G,A:G,A:G,A:G,A:G,A:G,A:G,A:G,A:G,A:G
AT4G11010	NDPK3	-	AT4G11010.1	324.4374974	23	4_6732887,4_6733227,4_6733033,4_6733264,4_6732992,4_6733298,4_6732834,4_6733194,4_6733232,4_6732811,4_6733867,4_6732862,4_6733437,4_6733228,4_6733013,4_6732812,4_6733233,4_6732831,4_6732802,4_6732820,4_6733470,4_6733179,4_6733070	0.0829,0.0925,0.0279,0.0394,0.0163,0.0107,0.0202,0.00439,0.00442,0.00395,0.0032,0.00335,0.00244,0.00322,0.00189,0.00286,0.00108,0.00187,0.000974,0.00102,0.000949,0.000918,0.00147	6.41,4.71,5.91,3.47,5.62,4.83,4.59,15.8,4.25,4.61,4.38,5.16,14,2.39,14.6,3.94,13.4,2.81,11.8,3.84,12.6,3.68,2.16	4.11e-83,6.32e-83,2.93e-47,3.04e-39,9.57e-35,1.12e-20,1.23e-20,4.42e-18,2.75e-13,2.07e-11,8.67e-10,1.52e-08,8.02e-08,1.12e-05,5.21e-05,5.53e-05,0.000221,0.000773,0.00125,0.00207,0.00248,0.00577,0.00766	T:C,T:C,T:C,T:C,T:C,T:C,T:C,T:C,T:C,T:C,T:C,T:C,T:C,T:C,T:C,T:C,T:C,T:C,T:C,T:C,T:C,T:C,T:C
AT5G07350	Tudor1	-	AT5G07350.1,AT5G07350.2	26.2277418,0.7738988	10	5_2321099,5_2320285,5_2322399,5_2324166,5_2321250,5_2321157,5_2323599,5_2321177,5_2323972,5_2320294	0.217,0.0153,0.0143,0.0157,0.00782,0.0045,0.0101,0.00296,0.00999,0.00733	3.42,13.8,13.4,11.9,3.22,13.3,3.88,12.8,12.7,12.7	4.72e-83,2.45e-07,5.33e-07,0.000202,0.000948,0.00109,0.00153,0.00212,0.00853,0.00883	T:C,T:C,T:C,T:C,T:C,T:C,T:C,T:C,T:C,T:C
AT5G41520	RPS10B	-	AT5G41520.1,AT5G41520.2	347.0696804,4.5705422	22	5_16610613,5_16609873,5_16610030,5_16610071,5_16609437,5_16610057,5_16609277,5_16610061,5_16609789,5_16609871,5_16609849,5_16609251,5_16609824,5_16610208,5_16609342,5_16609803,5_16609844,5_16610272,5_16610122,5_16609800,5_16610459,5_16609330	0.0564,0.0357,0.0229,0.0212,0.0326,0.0133,0.0123,0.00433,0.0049,0.00617,0.00519,0.0121,0.00419,0.00242,0.00471,0.00301,0.00338,0.00141,0.00109,0.000937,0.00248,0.0018	8.22,5.03,6.11,6.19,3.74,3.74,15.5,4.64,3.6,3.75,2.7,14,4.44,4.8,15.6,3.27,4.21,13.7,14,13.8,2.56,12.8	1.31e-82,7.56e-55,4.19e-48,1.49e-32,1.88e-32,1.97e-24,2.08e-12,7.14e-12,2.84e-11,4.73e-11,1.11e-09,1.34e-09,1.77e-09,6.25e-07,1.8e-06,2.33e-06,2.85e-06,1.38e-05,0.00135,0.00145,0.00548,0.00693	T:C,T:C,T:C,T:C,T:C,T:C,T:C,T:C,T:C,T:C,T:C,T:C,T:C,T:C,T:C,T:C,T:C,T:C,T:C,T:C,T:C,T:C
AT3G52580	RPS14C	+	AT3G52580.1	228.0487762	16	3_19504321,3_19504279,3_19504792,3_19504705,3_19504428,3_19503669,3_19504509,3_19504476,3_19504498,3_19503837,3_19504252,3_19504467,3_19504303,3_19504672,3_19503319,3_19503623	0.0817,0.573,0.107,0.0273,0.0054,0.00588,0.00549,0.00543,0.0082,0.00232,0.00235,0.00243,0.00213,0.00359,0.00295,0.00308	4.12,1.91,16.8,4.7,5.39,5.37,14.3,5.29,3.06,12.9,4.35,4.24,4.19,13.1,13.8,3.89	6.67e-82,1.96e-61,3.87e-60,3.89e-23,1.05e-10,1.26e-10,9.07e-10,9.62e-10,3.39e-06,1.45e-05,7.27e-05,0.000216,0.000259,0.000277,0.00121,0.00154	A:G,A:G,A:G,A:G,A:G,A:G,A:G,A:G,A:G,A:G,A:G,A:G,A:G,A:G,A:G,A:G
AT2G29960	CYP19-4	-	AT2G29960.1,AT2G29960.2	99.8822596,0.0868052	6	2_12769180,2_12769178,2_12769344,2_12769183,2_12769184,2_12769164	0.227,0.0924,0.0216,0.0326,0.0158,0.00978	7.57,16.4,6.81,14.9,13.8,14.1	7.75e-82,5.62e-34,1.73e-29,2.57e-17,3.8e-09,1.18e-05	T:C,T:C,T:C,T:C,T:C,T:C
AT5G03740	HDT3	+	AT5G03740.1	37.0785996	3	5_983985,5_984001,5_984061	0.242,0.0169,0.0158	6.9,14,12.4	9.63e-82,4.35e-07,0.000208	A:G,A:G,A:G
AT5G47030	AT5G47030	+	AT5G47030.1	360.6616402	28	5_19091940,5_19092209,5_19092053,5_19092075,5_19092076,5_19091878,5_19091926,5_19092072,5_19091973,5_19092106,5_19092208,5_19091814,5_19092210,5_19092039,5_19092074,5_19092077,5_19091997,5_19092034,5_19092069,5_19092132,5_19091942,5_19091931,5_19091810,5_19091753,5_19092073,5_19092234,5_19091938,5_19091844	0.0797,0.184,0.0679,0.0588,0.0544,0.0277,0.0288,0.0355,0.0208,0.026,0.0632,0.0129,0.0259,0.00749,0.00962,0.00906,0.00378,0.00317,0.00487,0.00499,0.00297,0.00312,0.00159,0.00131,0.00383,0.0116,0.00202,0.00186	18.2,18.3,7.19,17.8,7.67,18.5,5.72,16.5,16.7,6.92,6.85,6.73,14.6,5.52,14.6,14.5,15.7,13.6,13.6,4.68,4.61,15,12.9,13.1,13.2,13.4,12.2,12.8	2.51e-81,4.55e-66,9.44e-65,4.48e-58,1.28e-47,2.36e-44,1.43e-37,1.21e-33,7.55e-29,4.13e-28,1.93e-26,3.25e-25,3.05e-14,1.27e-10,6.95e-10,1.1e-08,2.4e-07,1.9e-06,3.12e-06,5.59e-06,8.96e-06,1.26e-05,0.000344,0.000795,0.000885,0.000894,0.000988,0.00125	A:G,A:G,A:G,A:G,A:G,A:G,A:G,A:G,A:G,A:G,A:G,A:G,A:G,A:G,A:G,A:G,A:G,A:G,A:G,A:G,A:G,A:G,A:G,A:G,A:G,A:G,A:G,A:G
AT5G02960	RPS23B	-	AT5G02960.1	1377.332624	19	5_693276,5_693854,5_693280,5_693821,5_693281,5_693264,5_693288,5_693341,5_693225,5_693350,5_693357,5_693541,5_693860,5_693299,5_693249,5_693516,5_693224,5_693570,5_693573	0.0541,0.00985,0.0229,0.0134,0.0323,0.0181,0.00783,0.00635,0.0108,0.00442,0.00318,0.00172,0.00122,0.00383,0.00285,0.00119,0.00215,0.000513,0.000444	18.1,6.85,7.8,4.81,7.79,17.5,6.57,4.68,14.7,4.07,4.17,4.47,13.5,5.3,15.3,2.66,14.9,3.06,2.88	8.99e-81,3.4e-63,9.11e-58,3.12e-54,2.18e-49,2.82e-33,1e-24,3.01e-23,2.16e-15,1.63e-13,8.64e-12,2.8e-10,2.49e-08,1.52e-07,7.94e-05,9.85e-05,0.000662,0.00332,0.00817	T:C,T:C,T:C,T:C,T:C,T:C,T:C,T:C,T:C,T:C,T:C,T:C,T:C,T:C,T:C,T:C,T:C,T:C,T:C
AT3G02560	RPS7B	+	AT3G02560.1,AT3G02560.2,AT3G02560.3	250.492215,NA	28	3_542406,3_543149,3_542798,3_543113,3_542539,3_541799,3_541818,3_542766,3_542683,3_542676,3_542369,3_542804,3_542763,3_543120,3_542540,3_541786,3_543115,3_542551,3_542922,3_542360,3_542391,3_542750,3_542400,3_542368,3_542771,3_543159,3_543089,3_542359	0.0551,0.091,0.0293,0.0233,0.0263,0.0377,0.0285,0.0133,0.00623,0.00902,0.00989,0.00467,0.00422,0.00695,0.00686,0.00977,0.00553,0.00234,0.00252,0.00366,0.00204,0.00204,0.00306,0.00349,0.00287,0.00253,0.00198,0.00202	6.71,7.5,6.81,7.25,7.35,5.23,16.6,4.46,16.3,4.44,4.26,15.5,13.9,14.7,3.42,15,5.14,14.4,14.6,15,13.6,14.2,4.38,3.52,4.25,13.3,3.86,14.2	9.91e-81,6.79e-80,1.07e-57,1.73e-39,2.31e-38,6.15e-37,1.2e-35,1.61e-19,1.95e-15,2.22e-15,1.06e-12,1.58e-12,4.14e-11,1.24e-10,5.96e-09,7.85e-09,1.3e-08,5.04e-07,5.21e-07,1.21e-06,1.91e-06,8.63e-06,4.92e-05,5.26e-05,0.0011,0.00218,0.0027,0.00421	A:G,A:G,A:G,A:G,A:G,A:G,A:G,A:G,A:G,A:G,A:G,A:G,A:G,A:G,A:G,A:G,A:G,A:G,A:G,A:G,A:G,A:G,A:G,A:G,A:G,A:G,A:G,A:G
AT1G78900	VHA-A	+	AT1G78900.1,AT1G78900.2	131.133149,NA	7	1_29664566,1_29664126,1_29663941,1_29664635,1_29664575,1_29664172,1_29664520	0.048,0.00621,0.00825,0.00461,0.00298,0.00275,0.00264	7.46,6.12,4.41,5.14,3.73,2.32,15.3	6.08e-80,9.55e-18,5.15e-09,4.76e-08,2.68e-05,0.000549,0.000572	A:G,A:G,A:G,A:G,A:G,A:G,A:G
AT5G08670	AT5G08670	-	AT5G08670.1	156.0978012	22	5_2818412,5_2818277,5_2820887,5_2818441,5_2818365,5_2819245,5_2818396,5_2818420,5_2820308,5_2819611,5_2818483,5_2819199,5_2820138,5_2818261,5_2820978,5_2818330,5_2819172,5_2820932,5_2818448,5_2818383,5_2820948,5_2820935	0.104,0.0204,0.00952,0.00569,0.0054,0.00427,0.00511,0.00352,0.00322,0.00336,0.00358,0.00257,0.00664,0.00891,0.00272,0.00529,0.00286,0.00399,0.00253,0.00279,0.00191,0.0022	8.65,16.7,4.64,16.2,15.8,4.43,4.47,15.1,15.2,2.84,5.21,15.1,4.01,14.4,12.4,13.7,15.4,2.65,4.24,2.93,3.62,2.7	1.03e-79,9.9e-24,1.65e-18,3.36e-15,3.31e-11,7.95e-10,1e-09,5.77e-09,8.11e-09,1e-08,1.65e-08,3.2e-07,9.15e-07,3.09e-06,7.98e-06,1.9e-05,0.000334,0.000521,0.000578,0.000696,0.0039,0.0087	T:C,T:C,T:C,T:C,T:C,T:C,T:C,T:C,T:C,T:C,T:C,T:C,T:C,T:C,T:C,T:C,T:C,T:C,T:C,T:C,T:C,T:C
AT3G44590	RPP2D	+	AT3G44590.1,AT3G44590.2	369.4047954,NA	4	3_16164481,3_16164046,3_16164765,3_16164447	0.045,0.0488,0.0259,0.0026	6.3,5.43,14.6,14.6	1.54e-79,1.95e-52,1.48e-14,1.78e-05	A:G,A:G,A:G,A:G
AT3G11940	RPS5B	-	AT3G11940.1,AT3G11940.2	498.6583742,NA	21	3_3778188,3_3778419,3_3778467,3_3778618,3_3779306,3_3778678,3_3778639,3_3778491,3_3778459,3_3779340,3_3778820,3_3778714,3_3778183,3_3778449,3_3778705,3_3778460,3_3779275,3_3778363,3_3778149,3_3778407,3_3778334	0.0581,0.0277,0.0164,0.0113,0.00476,0.00588,0.00379,0.00222,0.00488,0.00579,0.00257,0.00227,0.00221,0.00141,0.000998,0.00158,0.00114,0.00101,0.00178,0.000656,0.000912	8.55,5.1,5.23,6.32,5.21,4.98,4.51,5.57,3.49,3.18,2.62,3.15,13,4.41,4.35,14.4,3.53,3.99,3.64,3.59,3.66	1.69e-79,8.36e-74,4.65e-53,1.36e-39,4.84e-19,8.8e-18,2.15e-15,5.08e-12,9.39e-10,1.91e-08,1.33e-07,1.26e-06,2.95e-05,6e-05,6.84e-05,0.000102,0.000147,0.00114,0.0069,0.00744,0.00762	T:C,T:C,T:C,T:C,T:C,T:C,T:C,T:C,T:C,T:C,T:C,T:C,T:C,T:C,T:C,T:C,T:C,T:C,T:C,T:C,T:C
AT3G61110	RPS27B	+	AT3G61110.1	1429.4005372	6	3_22612550,3_22611708,3_22612549,3_22612411,3_22612561,3_22612637	0.0493,0.0342,0.00198,0.00142,0.00284,0.00186	4.96,5.79,3.9,4.59,1.96,2.92	4.48e-79,8.56e-58,3.54e-06,5.51e-06,7.31e-05,0.00693	A:G,A:G,A:G,A:G,A:G,A:G
AT3G14600	RPL18AC	+	AT3G14600.1	401.1310746	23	3_4911466,3_4911932,3_4911271,3_4911767,3_4911866,3_4911676,3_4912104,3_4911623,3_4911677,3_4911456,3_4911905,3_4911806,3_4911935,3_4911984,3_4911902,3_4911745,3_4911892,3_4911299,3_4911887,3_4911342,3_4911977,3_4911626,3_4911291	0.0321,0.0537,0.047,0.0119,0.00971,0.00795,0.047,0.00304,0.00369,0.00155,0.00334,0.0031,0.0047,0.00421,0.00265,0.00211,0.00232,0.00149,0.00232,0.00415,0.0031,0.000878,0.00109	5.9,7.95,4.72,5.83,6.27,16.8,14,15.3,2.97,3.41,15.5,4.69,4.54,14.4,12.7,4.43,12.6,4.24,14.6,1.64,13.6,3.6,2.86	1.84e-78,4.61e-53,2.81e-43,6.92e-28,6.75e-19,1.65e-18,1.18e-12,8.39e-10,1.89e-06,2.02e-06,3.57e-06,7.99e-06,1.63e-05,2.77e-05,3.94e-05,5.55e-05,6.71e-05,7.87e-05,0.000197,0.000242,0.000281,0.00534,0.0066	A:G,A:G,A:G,A:G,A:G,A:G,A:G,A:G,A:G,A:G,A:G,A:G,A:G,A:G,A:G,A:G,A:G,A:G,A:G,A:G,A:G,A:G,A:G
AT4G38920	VHA-C3	+	AT4G38920.1,AT4G38920.2	554.632307,0	15	4_18149004,4_18149001,4_18148741,4_18148330,4_18148858,4_18149000,4_18148857,4_18148856,4_18149021,4_18148266,4_18148357,4_18149003,4_18148795,4_18149002,4_18148740	0.062,0.0293,0.029,0.0102,0.0103,0.0116,0.00543,0.00385,0.00598,0.00232,0.0017,0.00405,0.00101,0.00204,0.0015	8.49,18.2,4.12,4.47,5.07,16.9,15.8,4.29,4.06,2.83,2.69,15.4,13.7,3.94,2.86	4.52e-78,8.52e-61,4.35e-52,1.79e-26,2.08e-23,1.74e-19,2.93e-15,4.9e-08,5.36e-07,7.87e-07,3.92e-05,0.000211,0.000372,0.00172,0.00204	A:G,A:G,A:G,A:G,A:G,A:G,A:G,A:G,A:G,A:G,A:G,A:G,A:G,A:G,A:G
AT3G52730	AT3G52730	-	AT3G52730.1,AT3G52730.2	1413.1512626,3.3501014	8	3_19543080,3_19543736,3_19544206,3_19544139,3_19543185,3_19543108,3_19542971,3_19543112	0.125,0.0246,0.005,0.00161,0.00203,0.00202,0.0124,0.0018	19.3,5.92,15.5,13.8,2.6,14.7,12,3.69	8.71e-78,1.6e-47,7.87e-11,4.77e-06,0.000787,0.00107,0.00206,0.00553	T:C,T:C,T:C,T:C,T:C,T:C,T:C,T:C
AT1G13560	AAPT1	-	AT1G13560.1,AT1G13560.3,AT1G13560.2	22.0845428,0	9	1_4639127,1_4638988,1_4641087,1_4639649,1_4639310,1_4640670,1_4640261,1_4640088,1_4641282	0.297,0.0722,0.0469,0.03,0.0136,0.012,0.0186,0.0111,0.0151	4.04,16.2,4.47,4.2,13.6,3.54,4.34,13.3,4.11	1.1e-77,1.25e-26,1.02e-10,2.69e-07,2.1e-05,5.11e-05,5.19e-05,2e-04,0.000229	T:C,T:C,T:C,T:C,T:C,T:C,T:C,T:C,T:C
AT5G08690	AT5G08690	+	AT5G08690.1	146.8816938	22	5_2828327,5_2828494,5_2827655,5_2828536,5_2828425,5_2828335,5_2827982,5_2826138,5_2827581,5_2828116,5_2826741,5_2828115,5_2828493,5_2827740,5_2827413,5_2828306,5_2827930,5_2828244,5_2827610,5_2828482,5_2827395,5_2828145	0.0437,0.0238,0.0172,0.0325,0.0131,0.0155,0.0163,0.0128,0.00322,0.00529,0.00691,0.00512,0.0109,0.00325,0.00245,0.00382,0.00618,0.00276,0.0022,0.00347,0.00108,0.00178	7.36,6.81,6.78,17,15.6,6.47,4.44,5.11,14.9,5.62,5.39,4.59,4.63,4.94,4.86,3.22,2.9,4.38,4.14,3.3,2.93,2.58	1.3e-77,4.62e-28,1.06e-25,7.82e-25,5.56e-23,1.82e-20,7.78e-19,1.16e-17,9.64e-13,4.57e-12,3.17e-11,5.43e-11,5.73e-11,1.22e-07,2.06e-07,1.38e-06,4.01e-05,0.000161,0.000165,0.000967,0.00536,0.0065	A:G,A:G,A:G,A:G,A:G,A:G,A:G,A:G,A:G,A:G,A:G,A:G,A:G,A:G,A:G,A:G,A:G,A:G,A:G,A:G,A:G,A:G
AT1G56330	SAR1B	-	AT1G56330.1	211.0406382	13	1_21086869,1_21086978,1_21088146,1_21086784,1_21086666,1_21086639,1_21086643,1_21086964,1_21086973,1_21086764,1_21086913,1_21086763,1_21086855	0.0698,0.00451,0.00704,0.00331,0.0056,0.00816,0.00638,0.00251,0.00168,0.00337,0.00316,0.00554,0.00198	6.8,15.5,4.36,13.6,14.4,12.9,14.6,13.7,14.5,13,2.81,14.4,3.85	3e-77,5.7e-10,3.22e-09,1.13e-05,2.29e-05,2.83e-05,4.7e-05,0.00017,0.00102,0.00154,0.00168,0.00252,0.00296	T:C,T:C,T:C,T:C,T:C,T:C,T:C,T:C,T:C,T:C,T:C,T:C,T:C
AT3G04600	AT3G04600	+	AT3G04600.1,AT3G04600.2	24.5292884,0	3	3_1245775,3_1245542,3_1243659	0.219,0.0505,0.0412	5.57,4.66,15.1	5.23e-77,2.78e-16,3.93e-09	A:G,A:G,A:G
AT5G39740	RPL5B	+	AT5G39740.1,AT5G39740.2	290.0203806,NA	14	5_15904167,5_15904093,5_15905140,5_15904944,5_15905160,5_15905196,5_15905163,5_15904330,5_15904517,5_15904056,5_15904840,5_15905223,5_15905220,5_15905115	0.043,0.014,0.00387,0.00233,0.00289,0.00396,0.00233,0.00264,0.00159,0.00195,9e-04,0.00168,0.00198,0.00168	5.14,5.71,15.7,15.9,5.2,3.55,3.91,3.64,2.99,4.05,12.1,14.1,14.3,2.25	9.6e-76,1.5e-25,5.15e-16,4.52e-11,3.36e-09,7.07e-07,2.03e-06,0.000303,0.000358,0.000466,0.000892,0.00109,0.00191,0.00333	A:G,A:G,A:G,A:G,A:G,A:G,A:G,A:G,A:G,A:G,A:G,A:G,A:G,A:G
AT1G53240	mMDH1	-	AT1G53240.1	216.0312784	11	1_19855660,1_19854861,1_19855035,1_19855862,1_19855697,1_19854855,1_19855090,1_19855006,1_19855946,1_19855039,1_19854924	0.029,0.0366,0.00779,0.0056,0.0025,0.00357,0.00229,0.00151,0.00273,0.00147,0.00176	6.19,5.22,5.49,3.59,3.86,13.7,4.52,4.2,12.5,3.69,2.51	1.06e-75,1.57e-41,4.46e-22,7.16e-08,1.61e-06,1.62e-06,2.02e-05,0.00029,0.000466,0.000502,0.00988	T:C,T:C,T:C,T:C,T:C,T:C,T:C,T:C,T:C,T:C,T:C
AT3G47833	SDH7A	+	AT3G47833.1	350.1872762	5	3_17649810,3_17649814,3_17649235,3_17648927,3_17649783	0.0804,0.0283,0.00396,0.00176,0.00328	5.98,6.59,4.31,12,4.02	1.48e-75,2.78e-24,0.000255,0.000793,0.00113	A:G,A:G,A:G,A:G,A:G
AT2G44520	COX10	+	AT2G44520.1	15.5881676	3	2_18381646,2_18381200,2_18381269	0.295,0.0389,0.0145	5.19,4.22,12.2	1.5e-75,3.76e-08,0.000473	A:G,A:G,A:G
AT3G08520	RPL41E	+	AT3G08520.1	4258.182158	4	3_2586184,3_2586003,3_2586310,3_2586193	0.0272,0.017,0.00425,0.00478	8.26,1.99,13.8,2.62	2.51e-75,1.26e-07,1.06e-06,0.000439	A:G,A:G,A:G,A:G
AT2G33370	RPL23C	-	AT2G33370.1,AT2G33370.2	345.2026324,0	22	2_14143731,2_14144069,2_14143741,2_14144106,2_14144132,2_14143750,2_14144119,2_14143717,2_14144094,2_14143792,2_14144030,2_14144209,2_14143933,2_14143896,2_14144019,2_14143705,2_14143688,2_14144064,2_14144241,2_14143732,2_14144224,2_14143638	0.045,0.0452,0.0581,0.0193,0.0297,0.021,0.0112,0.0113,0.00595,0.014,0.00367,0.00454,0.00368,0.00346,0.0045,0.00419,0.00431,0.0031,0.00207,0.00256,0.00122,0.0056	16.9,18.8,17.2,7.63,6.27,15.7,6.6,14.8,4.51,17.6,15.2,15.4,4.93,4.84,15.5,14,14.5,3.66,2.77,3.04,3.7,3.69	4.19e-75,8.99e-70,1.68e-55,2.33e-48,6.57e-37,3.77e-33,2.39e-23,6.93e-17,2.24e-15,4.85e-14,9.92e-11,3.3e-09,9.18e-08,8.32e-07,2.65e-06,1.13e-05,0.00048,0.000691,0.00242,0.00438,0.00495,0.00649	T:C,T:C,T:C,T:C,T:C,T:C,T:C,T:C,T:C,T:C,T:C,T:C,T:C,T:C,T:C,T:C,T:C,T:C,T:C,T:C,T:C,T:C
AT2G18020	RPL8A	+	AT2G18020.1	550.6493776	21	2_7837975,2_7837390,2_7837876,2_7838059,2_7837367,2_7838159,2_7837589,2_7838033,2_7837569,2_7837976,2_7838001,2_7837494,2_7837429,2_7838168,2_7838104,2_7837568,2_7837448,2_7837174,2_7837477,2_7838084,2_7837577	0.0354,0.023,0.00885,0.00963,0.00482,0.00987,0.00245,0.00254,0.00232,0.00168,0.00235,0.00197,0.00132,0.00258,0.000908,0.000678,0.00135,0.0015,0.00135,0.00136,0.00102	5.25,2.73,4.29,3.61,6.32,16.6,3.86,5.18,4.02,3.7,2.71,3.75,4.39,12.7,13.6,13.1,2.81,3.84,3.96,2.2,13.3	1.54e-74,1.02e-45,6.18e-35,7.96e-29,1.95e-21,4.75e-20,4.24e-09,3.82e-08,9.51e-07,1.21e-05,1.22e-05,5.06e-05,9.81e-05,0.000163,0.000599,0.000692,0.000927,0.00252,0.0039,0.00417,0.00454	A:G,A:G,A:G,A:G,A:G,A:G,A:G,A:G,A:G,A:G,A:G,A:G,A:G,A:G,A:G,A:G,A:G,A:G,A:G,A:G,A:G
AT2G23090	AT2G23090	-	AT2G23090.1	2099.7308212	2	2_9829772,2_9830308	0.0486,0.00261	4.13,12.6	1.65e-74,0.00011	T:C,T:C
AT4G30010	AT4G30010	+	AT4G30010.1	2212.0848164	7	4_14674036,4_14673935,4_14672959,4_14673185,4_14673977,4_14673040,4_14673199	0.0958,0.00752,0.0072,0.00157,0.00155,0.00133,0.00163	18.5,16.5,3.57,4.65,13.9,3.52,2.49	1.66e-74,4.38e-17,5.64e-14,3.76e-06,6.51e-05,0.00011,0.000706	A:G,A:G,A:G,A:G,A:G,A:G,A:G
AT1G51650	AT1G51650	+	AT1G51650.1	4579.4292076	9	1_19153693,1_19153678,1_19152668,1_19153780,1_19153681,1_19153690,1_19153694,1_19152813,1_19152834	0.0484,0.0111,0.0127,0.0133,0.00212,0.00285,0.00312,0.00098,0.000507	19.3,5.7,3.75,15.6,4.18,15.2,4.17,2.43,14.2	2.29e-74,1.34e-24,1.21e-22,2.53e-18,3.07e-08,3.31e-08,2.03e-07,0.0018,0.00554	A:G,A:G,A:G,A:G,A:G,A:G,A:G,A:G,A:G
AT4G25100	FSD1	-	AT4G25100.1,AT4G25100.4	680.8469256,0	8	4_12884623,4_12884597,4_12885546,4_12884731,4_12885136,4_12885127,4_12884602,4_12884617	0.126,0.00836,0.00621,0.00481,0.00117,0.000757,0.000969,0.00119	3.41,6.89,2.58,3.3,4.93,14.8,13.3,3.92	3.6e-74,9.84e-31,1.92e-14,1.18e-13,1.85e-07,8.36e-06,0.00103,0.00118	T:C,T:C,T:C,T:C,T:C,T:C,T:C,T:C
AT1G57720	AT1G57720	+	AT1G57720.1,AT1G57720.2	108.1205406,NA	29	1_21379835,1_21380173,1_21379885,1_21379873,1_21377834,1_21380187,1_21380117,1_21379870,1_21379871,1_21379967,1_21380035,1_21380152,1_21380046,1_21379828,1_21378752,1_21378179,1_21380177,1_21379169,1_21380166,1_21379918,1_21378541,1_21380110,1_21378973,1_21378251,1_21380027,1_21379428,1_21379165,1_21379960,1_21377873	0.0664,0.0476,0.0927,0.051,0.0466,0.0247,0.0146,0.00654,0.00628,0.0044,0.00525,0.00867,0.00386,0.00337,0.00412,0.00382,0.00485,0.00339,0.00363,0.00254,0.00368,0.00234,0.00337,0.0033,0.00219,0.00327,0.00272,0.00221,0.00175	4.14,6.78,2.98,4.76,5.75,16.6,6.39,15,14.6,14.5,5.36,5.25,13.9,13.7,13.7,3.59,4.47,13.6,4.21,4.17,3.29,13.1,3.15,2.38,3.14,2.74,13.7,2.44,11.8	4.63e-74,5.33e-54,5.99e-50,1.1e-32,3.49e-28,1.08e-26,6.09e-21,5.7e-12,6.18e-12,3.71e-10,4.61e-10,1.65e-08,4.74e-07,3.18e-06,4.85e-06,1.97e-05,4.16e-05,5.69e-05,0.000345,0.000477,0.00049,0.000625,0.00147,0.00261,0.00286,0.00382,0.00384,0.00721,0.00975	A:G,A:G,A:G,A:G,A:G,A:G,A:G,A:G,A:G,A:G,A:G,A:G,A:G,A:G,A:G,A:G,A:G,A:G,A:G,A:G,A:G,A:G,A:G,A:G,A:G,A:G,A:G,A:G,A:G
AT3G10860	AT3G10860	+	AT3G10860.1,AT3G10860.2	4308.1171342,NA	16	3_3400483,3_3399924,3_3400560,3_3400495,3_3400504,3_3400492,3_3399912,3_3400526,3_3400581,3_3400540,3_3400501,3_3399981,3_3399815,3_3400557,3_3400477,3_3400537	0.0447,0.042,0.0307,0.0262,0.0162,0.0105,0.00913,0.00896,0.00514,0.00318,0.00361,0.0012,0.00231,0.00105,0.000495,0.000852	4.29,3.47,7.62,7.59,5.91,4.49,5.13,18.2,15.1,5.33,2.83,3.53,4.51,13.8,3.82,3.59	5.88e-74,3.56e-57,3.51e-53,1.88e-48,1.7e-43,1.76e-32,3.52e-26,1.5e-25,2.34e-13,9.07e-10,1.31e-09,1.02e-05,2.16e-05,0.00114,0.00246,0.00946	A:G,A:G,A:G,A:G,A:G,A:G,A:G,A:G,A:G,A:G,A:G,A:G,A:G,A:G,A:G,A:G
AT3G04920	RPS24A	+	AT3G04920.1,AT3G04920.2	702.185585,2.569888	10	3_1361376,3_1362145,3_1361563,3_1362228,3_1362057,3_1361515,3_1362111,3_1361519,3_1360997,3_1361562	0.0182,0.0398,0.0262,0.0899,0.00197,0.00158,0.00185,0.00096,0.0013,0.00197	6.45,7.42,5.65,5.61,4.35,4.56,12.2,3.56,3.56,2.74	7.62e-74,1.4e-38,2.36e-37,2.63e-36,8.85e-05,9.28e-05,0.00033,0.00541,0.00854,0.00875	A:G,A:G,A:G,A:G,A:G,A:G,A:G,A:G,A:G,A:G
AT2G17390	AKR2B	+	AT2G17390.1	78.042273	13	2_7557443,2_7557727,2_7556539,2_7555862,2_7556330,2_7557810,2_7556035,2_7557761,2_7557811,2_7557716,2_7556805,2_7557497,2_7555861	0.0372,0.0134,0.0129,0.0139,0.00547,0.00873,0.00409,0.00653,0.00818,0.00477,0.0035,0.00319,0.00611	7.16,5.27,4.11,14.1,13.7,13.6,4.22,12.7,12.9,3.88,3.74,3.13,12.2	1.35e-73,7.21e-09,2.21e-07,1.09e-06,1.19e-05,2.47e-05,0.000146,0.000224,0.000595,0.00334,0.00461,0.00548,0.00702	A:G,A:G,A:G,A:G,A:G,A:G,A:G,A:G,A:G,A:G,A:G,A:G,A:G
AT1G19600	AT1G19600	+	AT1G19600.1	46.3348612	6	1_6780919,1_6779773,1_6780970,1_6780041,1_6780867,1_6779411	0.148,0.012,0.0099,0.00574,0.00498,0.00408	4.08,3.36,13.3,12.4,3.85,2.94	1.83e-73,1.25e-05,0.000253,0.000296,0.00363,0.00539	A:G,A:G,A:G,A:G,A:G,A:G
AT2G30050	SEC13B	+	AT2G30050.1	60.3872912	10	2_12826358,2_12826292,2_12826384,2_12826400,2_12826161,2_12825980,2_12826306,2_12826431,2_12825839,2_12825553	0.189,0.0352,0.0459,0.0195,0.0151,0.0188,0.0149,0.0252,0.00682,0.00325	4.95,15,15.4,3.82,5.48,5.43,4.31,4.93,12.6,13.4	3.32e-73,2.11e-26,1.04e-22,9.7e-12,2.37e-10,2.74e-10,1.56e-08,3.96e-06,0.000418,0.000511	A:G,A:G,A:G,A:G,A:G,A:G,A:G,A:G,A:G,A:G
AT4G35490	MRPL11	+	AT4G35490.1,AT4G35490.2	208.9044446,NA	8	4_16856033,4_16856390,4_16856328,4_16856327,4_16856069,4_16856118,4_16856417,4_16856025	0.0569,0.0378,0.0108,0.0141,0.00354,0.00189,0.00644,0.00206	4.58,17.2,13.3,5.14,15,14.5,13.2,2.99	4.74e-73,3.93e-19,1.8e-09,4.39e-08,1.94e-07,6.4e-05,0.000871,0.00344	A:G,A:G,A:G,A:G,A:G,A:G,A:G,A:G
AT2G19750	RPS30C	+	AT2G19750.1	997.944591	8	2_8515891,2_8515809,2_8515865,2_8515815,2_8515778,2_8515256,2_8515802,2_8515913	0.0952,0.0229,0.0134,0.00614,0.00394,0.00713,0.00174,0.00385	7.3,17.8,5.86,4.56,5.23,2.49,12,3.88	7.12e-73,1.51e-51,1.24e-13,5.36e-11,1.2e-09,8.9e-07,0.000301,0.00228	A:G,A:G,A:G,A:G,A:G,A:G,A:G,A:G
AT3G59890	DAPB2	-	AT3G59890.1,AT3G59890.2	10.3782502,0	10	3_22124441,3_22124442,3_22124440,3_22124439,3_22124468,3_22124438,3_22124443,3_22124953,3_22124507,3_22125231	0.693,0.209,0.141,0.16,0.0464,0.0535,0.0444,0.0236,0.0253,0.027	6.11,4.66,14.4,14.6,14.6,12.8,13.2,13,13.1,13	2.09e-72,9.55e-16,3.32e-13,1.85e-10,6.58e-05,0.000319,0.000529,0.00078,0.00266,0.00919	T:C,T:C,T:C,T:C,T:C,T:C,T:C,T:C,T:C,T:C
AT1G30630	AT1G30630	-	AT1G30630.1	71.6096954	5	1_10858542,1_10859013,1_10859141,1_10859300,1_10858802	0.101,0.0208,0.0326,0.00732,0.00516	7.25,16.7,3.94,14.1,14.2	2.24e-72,1.93e-22,8.5e-16,1.03e-07,3.2e-05	T:C,T:C,T:C,T:C,T:C
AT3G49910	RPL26A	+	AT3G49910.1	1627.3885466	21	3_18504357,3_18504754,3_18504780,3_18504672,3_18504750,3_18504800,3_18504315,3_18504755,3_18504794,3_18504765,3_18504401,3_18504817,3_18504320,3_18504398,3_18504751,3_18504435,3_18504363,3_18504560,3_18504326,3_18504768,3_18504758	0.197,0.0489,0.0358,0.0188,0.0186,0.0162,0.0115,0.00641,0.0125,0.0045,0.00231,0.00254,0.0013,0.000763,0.00177,0.00103,0.000934,0.00136,0.000779,0.00117,0.00114	1.9,6.01,8.18,4.96,6.31,7.1,3.87,6.23,6.27,15.5,3.83,14.7,14,14.7,4.58,3.85,3.44,3.59,3.86,3.75,3.66	3.23e-72,1.78e-62,1.92e-62,1.69e-59,9.05e-37,2.29e-31,2.83e-30,1.39e-18,8.09e-18,9.31e-14,3.09e-12,2.24e-08,4.28e-06,7.98e-06,1.1e-05,0.000155,0.000161,0.00138,0.00234,0.00419,0.00959	A:G,A:G,A:G,A:G,A:G,A:G,A:G,A:G,A:G,A:G,A:G,A:G,A:G,A:G,A:G,A:G,A:G,A:G,A:G,A:G,A:G
AT2G40010	RPP0A	-	AT2G40010.1	9.5396442	24	2_16710040,2_16710232,2_16709107,2_16710399,2_16709117,2_16710417,2_16708617,2_16710221,2_16709116,2_16710429,2_16710029,2_16708626,2_16710437,2_16710057,2_16708629,2_16710334,2_16710044,2_16709108,2_16708964,2_16708564,2_16710234,2_16710233,2_16710261,2_16710031	0.468,0.454,0.17,0.086,0.109,0.0866,0.111,0.0542,0.0954,0.0689,0.0381,0.0619,0.0499,0.0345,0.048,0.0254,0.0221,0.051,0.0353,0.0374,0.0205,0.0169,0.0174,0.0146	4.07,6.63,6.25,14.7,15.2,5.63,13.9,14.1,4.37,14.3,13.6,15,13.8,14,12.6,13.5,12.8,14.5,13.5,12.2,13.2,12.3,12.9,12.1	4.26e-72,7.82e-72,3.33e-20,9.41e-17,4.03e-14,1.92e-13,1.43e-12,7.59e-10,7.7e-10,2.97e-09,4.37e-08,6.96e-08,5.42e-07,1.63e-06,4.52e-06,2.01e-05,9.7e-05,0.00019,0.000577,0.000923,0.0017,0.00374,0.00384,0.00566	T:C,T:C,T:C,T:C,T:C,T:C,T:C,T:C,T:C,T:C,T:C,T:C,T:C,T:C,T:C,T:C,T:C,T:C,T:C,T:C,T:C,T:C,T:C,T:C
AT3G11130	CHC1	-	AT3G11130.1	17.0378692	7	3_3482934,3_3483123,3_3482529,3_3483157,3_3482494,3_3484925,3_3482562	0.185,0.0643,0.0112,0.00496,0.00858,0.0221,0.00844	3.14,5.02,15.5,14.2,4.46,2.9,4.2	1.38e-71,3.27e-60,2.46e-09,8e-05,0.000135,0.000304,0.00122	T:C,T:C,T:C,T:C,T:C,T:C,T:C
AT2G33470	GLTP1	-	AT2G33470.1,AT2G33470.2	122.8003946,NA	10	2_14177256,2_14176744,2_14176584,2_14176540,2_14177878,2_14176814,2_14176571,2_14177284,2_14176743,2_14176847	0.0786,0.0261,0.0341,0.00932,0.00953,0.00441,0.00472,0.0033,0.00257,0.00455	4.47,16,6.94,5.1,4.01,13.5,13.6,13.6,13.2,2.5	1.68e-71,4.04e-31,7.18e-28,3.65e-08,1.61e-06,5.09e-06,2.8e-05,0.000855,0.00136,0.0028	T:C,T:C,T:C,T:C,T:C,T:C,T:C,T:C,T:C,T:C
AT1G72370	RPSAA	-	AT1G72370.1,AT1G72370.2	420.4673708,0.5034854	29	1_27244152,1_27244054,1_27244721,1_27243147,1_27243809,1_27243081,1_27243149,1_27244832,1_27243148,1_27243719,1_27243710,1_27243208,1_27244105,1_27243206,1_27243133,1_27243478,1_27244799,1_27243722,1_27244074,1_27243114,1_27244039,1_27244014,1_27243919,1_27243350,1_27243973,1_27243988,1_27243341,1_27243307,1_27244877	0.0757,0.0153,0.0801,0.0136,0.0148,0.0144,0.00866,0.00639,0.00523,0.00555,0.0139,0.00319,0.00344,0.00486,0.00256,0.00235,0.00165,0.0015,0.00188,0.00145,0.00159,0.00106,0.0021,0.00102,0.000784,0.00108,0.00111,0.00231,0.00142	2.47,6.36,2.4,7.73,5.07,5.99,4.46,6.36,16.1,16.1,4.92,5.96,3.58,2.75,15.1,5.31,13.9,14.3,3.39,13.3,2.82,14,3.69,4.22,14.7,2.89,2.76,1.49,13.6	2.4e-71,9.85e-63,2.44e-61,4.53e-55,8.4e-41,7.58e-30,1.16e-27,1.26e-22,2.15e-22,2.62e-21,2.62e-20,2.03e-15,1.03e-12,1.54e-11,3.73e-11,4.38e-10,5.72e-08,6.63e-06,1.07e-05,4.08e-05,9.76e-05,0.000139,0.000173,0.000247,0.000556,0.00123,0.0015,0.00384,0.00401	T:C,T:C,T:C,T:C,T:C,T:C,T:C,T:C,T:C,T:C,T:C,T:C,T:C,T:C,T:C,T:C,T:C,T:C,T:C,T:C,T:C,T:C,T:C,T:C,T:C,T:C,T:C,T:C,T:C
AT5G16440	IPP1	+	AT5G16440.1	47.8376346	11	5_5373493,5_5373433,5_5373410,5_5373157,5_5373492,5_5373434,5_5373002,5_5373122,5_5373430,5_5371907,5_5373464	0.0893,0.0125,0.0132,0.0157,0.00589,0.00439,0.00805,0.00788,0.00329,0.00559,0.00495	8.3,5.81,5.74,4.97,14.5,14,12.9,12.9,13,14.2,4.09	4.42e-71,4.65e-14,3.14e-13,3.37e-07,1.44e-06,2.58e-05,0.000109,0.000398,0.00061,0.0012,0.00143	A:G,A:G,A:G,A:G,A:G,A:G,A:G,A:G,A:G,A:G,A:G
AT4G24690	AT4G24690	+	AT4G24690.1	64.4395438	16	4_12743911,4_12743984,4_12743940,4_12744192,4_12741624,4_12743946,4_12741626,4_12742908,4_12744141,4_12743244,4_12744004,4_12743626,4_12743250,4_12744123,4_12741603,4_12741688	0.103,0.0297,0.0189,0.0146,0.0168,0.0106,0.00952,0.00675,0.00383,0.00518,0.0053,0.00419,0.00333,0.00384,0.00301,0.00273	2.66,7.32,5.81,4.63,5.89,4.35,5.17,12.6,4.57,13.6,4.37,13.5,13,14,13.3,11.8	6.44e-71,4.58e-35,1.13e-25,2.37e-15,6.6e-15,2.31e-12,3.75e-09,6.2e-06,2.95e-05,3.84e-05,6.5e-05,8.02e-05,0.000265,0.000831,0.00307,0.00401	A:G,A:G,A:G,A:G,A:G,A:G,A:G,A:G,A:G,A:G,A:G,A:G,A:G,A:G,A:G,A:G
AT2G34480	RPL18AB	-	AT2G34480.1,AT2G34480.2	406.9757696,402.97545	25	2_14532816,2_14532915,2_14532944,2_14532947,2_14533041,2_14532969,2_14533181,2_14533010,2_14533205,2_14532916,2_14532917,2_14532962,2_14533980,2_14533187,2_14533209,2_14532914,2_14532938,2_14533950,2_14533182,2_14533954,2_14533202,2_14533016,2_14532936,2_14533197,2_14532954	0.0637,0.055,0.0213,0.00732,0.00538,0.00423,0.00228,0.00235,0.00149,0.00257,0.00359,0.00212,0.00208,0.000997,0.00314,0.00207,0.00252,0.000761,0.00113,0.000417,0.000651,0.000808,0.000955,0.00168,0.000938	7.28,5.24,4.78,4.49,3.41,4.57,3.69,4.31,4.28,14.6,3.3,5.14,3.61,4.92,3.36,14.4,4.9,4.7,2.55,3.87,2.75,13.5,3.86,2.48,2.57	7.71e-71,8.8e-66,2.38e-33,9.9e-18,1.07e-15,4.15e-10,7.46e-10,8.02e-10,1.44e-09,1.51e-09,3.61e-09,8.11e-08,9.27e-08,1.09e-07,1.72e-07,2.98e-07,8.36e-07,1.07e-06,2.36e-05,0.00147,0.00151,0.00164,0.0023,0.00488,0.00664	T:C,T:C,T:C,T:C,T:C,T:C,T:C,T:C,T:C,T:C,T:C,T:C,T:C,T:C,T:C,T:C,T:C,T:C,T:C,T:C,T:C,T:C,T:C,T:C,T:C
AT3G18410	AT3G18410	+	AT3G18410.1,AT3G18410.2	754.0167794,NA	6	3_6324404,3_6323751,3_6324489,3_6324433,3_6323276,3_6323304	0.11,0.00306,0.00635,0.00255,0.00143,0.00154	8.42,4.88,14.5,12.6,12.3,3.93	1.21e-70,3.38e-07,6.85e-06,0.000182,0.000379,0.00208	A:G,A:G,A:G,A:G,A:G,A:G
AT4G34720	VHA-C3	-	AT4G34720.1,AT4G34720.2	303.7347576,0.628417	8	4_16568197,4_16568198,4_16568268,4_16568281,4_16568570,4_16568298,4_16568220,4_16569141	0.0599,0.063,0.0213,0.00548,0.0024,0.00296,0.00299,0.00234	19.7,8.3,4.64,16.2,14.5,3.91,12.9,14.4	1.39e-70,1.38e-65,9.56e-28,4.35e-14,3.31e-06,5.68e-06,6.19e-06,0.000355	T:C,T:C,T:C,T:C,T:C,T:C,T:C,T:C
AT1G61570	TIM13	-	AT1G61570.1	341.9501428	7	1_22719363,1_22719369,1_22718869,1_22718884,1_22719006,1_22718983,1_22718996	0.118,0.0366,0.0139,0.0106,0.0018,0.00232,0.00393	3.73,5.8,13.6,4.33,12.6,12.9,2.7	1.89e-70,9.01e-28,8.66e-09,0.000284,0.00281,0.00289,0.00303	T:C,T:C,T:C,T:C,T:C,T:C,T:C
AT5G15320	AT5G15320	+	AT5G15320.1,AT5G15320.2	999.7664408,1.9155526	10	5_4978835,5_4978633,5_4978723,5_4978749,5_4978834,5_4978692,5_4978755,5_4978662,5_4977855,5_4978798	0.183,0.0504,0.0176,0.0138,0.0234,0.00518,0.00381,0.00199,0.00278,0.00536	8.17,7.54,16.4,15,14.4,14.6,12.4,3.92,2.35,3.72	9.37e-70,5.44e-43,6.78e-20,5.35e-13,5.16e-10,3.63e-08,0.00138,0.00181,0.00402,0.00474	A:G,A:G,A:G,A:G,A:G,A:G,A:G,A:G,A:G,A:G
AT2G40510	RPS26B	+	AT2G40510.1	497.6717978	13	2_16918840,2_16918497,2_16918504,2_16919669,2_16918649,2_16919702,2_16918813,2_16918865,2_16918790,2_16918789,2_16919163,2_16918817,2_16918868	0.0963,0.0195,0.033,0.0347,0.00283,0.0116,0.00227,0.00188,0.00212,0.00362,0.00183,0.00243,0.000844	3.48,6.93,16.8,15,14.7,13.4,14.3,14.6,4.64,4.6,14.6,2.57,3.62	1.23e-69,1.92e-33,1.71e-29,1.09e-19,6.04e-11,1.02e-08,1.11e-08,3.27e-07,1.24e-06,1.98e-05,0.000209,0.000684,0.0071	A:G,A:G,A:G,A:G,A:G,A:G,A:G,A:G,A:G,A:G,A:G,A:G,A:G
AT3G02780	IPP2	-	AT3G02780.1,AT3G02780.2	172.4722382,4.886336	4	3_602660,3_603838,3_603166,3_602735	0.0828,0.00233,0.00401,0.00212	4.88,14.5,3.76,4.55	1.59e-69,3.2e-06,5.09e-06,2.52e-05	T:C,T:C,T:C,T:C
AT5G43830	AT5G43830	-	AT5G43830.1	133.0264436	3	5_17622563,5_17622440,5_17622524	0.0987,0.0681,0.0308	3.71,16.7,16.4	1.74e-69,1.43e-25,6.49e-21	T:C,T:C,T:C
AT3G52300	ATPQ	+	AT3G52300.1,AT3G52300.2	865.2917788,0.175347	19	3_19397879,3_19398150,3_19397848,3_19398115,3_19398147,3_19396677,3_19397837,3_19398058,3_19396687,3_19397882,3_19397867,3_19396689,3_19397294,3_19397857,3_19397694,3_19397878,3_19398049,3_19396688,3_19397843	0.0326,0.0563,0.0111,0.0263,0.00967,0.0105,0.00568,0.00141,0.00273,0.00124,0.00156,0.0017,0.000739,0.000871,0.00216,0.00213,0.000773,0.00158,0.00104	7.24,7.89,5.27,5.91,15.1,16.6,4.1,14.2,14.6,13.6,3.26,14.4,3.37,4.04,2.43,3.18,13.5,3.73,2.31	2.7e-69,4.1e-51,6.53e-45,2.66e-26,7.87e-25,1.85e-21,6.99e-17,2.61e-07,5.47e-06,1.47e-05,2.27e-05,0.000125,0.00031,0.000715,0.000825,0.000883,0.00272,0.00409,0.00711	A:G,A:G,A:G,A:G,A:G,A:G,A:G,A:G,A:G,A:G,A:G,A:G,A:G,A:G,A:G,A:G,A:G,A:G,A:G
AT1G26550	AT1G26550	+	AT1G26550.1	429.103238	15	1_9172454,1_9172530,1_9172126,1_9171817,1_9171859,1_9172518,1_9171931,1_9172709,1_9172744,1_9172749,1_9171828,1_9172487,1_9171839,1_9172738,1_9171840	0.105,0.0825,0.0367,0.028,0.00535,0.0131,0.00253,0.0122,0.0118,0.0064,0.00344,0.00395,0.00412,0.00562,0.00127	4.18,5.22,4.16,4.57,16,4.8,5.13,4.13,15.4,15,12.9,4.95,3.18,13.7,13.4	7.5e-69,1.84e-61,3.95e-42,6.4e-29,3.06e-15,1.46e-12,1.66e-09,5.08e-08,4.03e-07,7.98e-07,1.72e-06,2.51e-06,2.91e-05,8.85e-05,0.00132	A:G,A:G,A:G,A:G,A:G,A:G,A:G,A:G,A:G,A:G,A:G,A:G,A:G,A:G,A:G
AT1G74270	RPL35AC	-	AT1G74270.1	573.5466754	14	1_27928453,1_27928444,1_27928558,1_27928675,1_27928693,1_27928769,1_27928700,1_27929436,1_27928694,1_27928403,1_27929440,1_27928601,1_27928667,1_27928634	0.0578,0.0122,0.00492,0.003,0.00401,0.00339,0.0031,0.00395,0.00163,0.00278,0.00272,0.00211,0.000907,0.00115	7.21,5.93,15.6,4.17,4.13,3.01,4.69,13.1,3.25,13.9,13.2,2.46,13.5,12	1.46e-68,7.06e-14,2.16e-10,2.77e-08,1.39e-07,4.85e-06,5.78e-06,2.08e-05,0.000643,0.00104,0.00112,0.00229,0.005,0.00552	T:C,T:C,T:C,T:C,T:C,T:C,T:C,T:C,T:C,T:C,T:C,T:C,T:C,T:C
AT3G19820	DIM	-	AT3G19820.1,AT3G19820.2,AT3G19820.3	119.1995632,NA	3	3_6880528,3_6879859,3_6880539	0.0493,0.013,0.00314	4.28,4.95,4.66	1.51e-68,3.7e-13,4.38e-06	T:C,T:C,T:C
AT5G49510	PFD3	+	AT5G49510.1,AT5G49510.2	51.1188906,NA	5	5_20082092,5_20082115,5_20080777,5_20081938,5_20082061	0.199,0.0245,0.0319,0.00789,0.00585	3.68,16.5,4.45,12.8,13.8	2e-68,2.69e-21,1.04e-09,9.91e-06,0.00153	A:G,A:G,A:G,A:G,A:G
AT2G19830	VPS32.1	-	AT2G19830.2,AT2G19830.1	54.8645388,0.7868366	1	2_8558102	0.181	4.98	2.33e-68	T:C
AT3G25520	ATL5	-	AT3G25520.1,AT3G25520.2,AT3G25520.3	241.393354,97.1819946,NA	18	3_9270661,3_9269944,3_9270729,3_9270627,3_9270196,3_9270271,3_9270038,3_9271341,3_9269517,3_9270783,3_9270732,3_9270899,3_9270037,3_9270467,3_9269893,3_9269538,3_9270885,3_9270730	0.0277,0.0203,0.0215,0.405,0.0107,0.0193,0.0076,0.017,0.00781,0.00233,0.00177,0.00219,0.00111,0.00188,0.00128,0.00204,0.00102,0.00168	5.09,7.74,6.16,1.41,7.07,3.41,4.53,6.23,4.64,4.68,4.32,4.3,13.7,3.36,3.12,3.89,13.5,2.48	4.25e-68,8.87e-51,2.24e-36,3.65e-35,4.58e-34,5.98e-34,1.11e-21,3.42e-20,2.55e-11,1.45e-06,5.19e-05,7.15e-05,0.000168,0.000989,0.00185,0.00213,0.00592,0.00832	T:C,T:C,T:C,T:C,T:C,T:C,T:C,T:C,T:C,T:C,T:C,T:C,T:C,T:C,T:C,T:C,T:C,T:C
AT1G48030	LPD1	-	AT1G48030.1,AT1G48030.2,AT1G48030.3,AT1G48030.4,AT1G48030.5	40.4384048,NA	6	1_17717284,1_17717311,1_17717276,1_17717448,1_17717288,1_17717491	0.228,0.0952,0.0418,0.0065,0.00881,0.00619	6.24,17.6,5.2,12.5,13.1,3.95	6.61e-68,5.82e-34,7.3e-08,0.000132,0.000494,0.00289	T:C,T:C,T:C,T:C,T:C,T:C
AT5G23900	RPL13D	-	AT5G23900.1	196.8180946	12	5_8064195,5_8064305,5_8064186,5_8064884,5_8064788,5_8064624,5_8064755,5_8064502,5_8064183,5_8064799,5_8064380,5_8065081	0.0494,0.0361,0.0204,0.00586,0.00458,0.00599,0.00235,0.00291,0.00545,0.00225,0.00177,0.00804	7.08,6.07,15.2,4.82,14,3.75,13,15.3,14.8,14.4,14.1,2.57	7.19e-68,3.96e-48,1.29e-30,7.71e-14,3.86e-13,4.92e-08,7.83e-07,4.46e-06,1.46e-05,3.88e-05,0.000325,0.000704	T:C,T:C,T:C,T:C,T:C,T:C,T:C,T:C,T:C,T:C,T:C,T:C
AT5G11340	AT5G11340	+	AT5G11340.1	57.7590078	3	5_3621025,5_3621091,5_3621017	0.132,0.209,0.0217	17.1,16.5,14.9	8.23e-68,4.27e-54,7.32e-09	A:G,A:G,A:G
AT4G22220	ISU1	-	AT4G22220.1	168.4505854	5	4_11759398,4_11759397,4_11759367,4_11759409,4_11759390	0.13,0.028,0.00744,0.00343,0.00363	8.43,6.59,4.51,3.96,2.89	2.48e-67,2.32e-22,1.88e-05,0.00199,0.00906	T:C,T:C,T:C,T:C,T:C
AT2G21870	MGP1	-	AT2G21870.1,AT2G21870.2	502.166139,0.4520928	17	2_9320622,2_9320620,2_9320466,2_9320621,2_9320411,2_9320281,2_9320891,2_9320417,2_9320443,2_9321366,2_9321600,2_9320456,2_9320380,2_9320477,2_9320457,2_9321711,2_9321648	0.0451,0.0309,0.0263,0.0102,0.00478,0.0189,0.0031,0.00517,0.00646,0.00346,0.00201,0.00199,0.00347,0.00123,0.000998,0.000649,0.00145	5.33,6.91,18.5,4.89,5.67,16.2,3.26,4.64,4.68,2.94,4.93,13.7,3.07,13.9,12.3,3.94,2.21	7.76e-67,1.92e-54,2.95e-53,1.41e-26,1.64e-12,5.22e-12,8.08e-11,9.11e-11,5.74e-10,5.24e-07,1.82e-06,2.31e-06,1.12e-05,0.000152,0.000845,0.00151,0.00911	T:C,T:C,T:C,T:C,T:C,T:C,T:C,T:C,T:C,T:C,T:C,T:C,T:C,T:C,T:C,T:C,T:C
AT3G53870	RPS3B	+	AT3G53870.1	307.7731216	7	3_19952703,3_19952733,3_19952731,3_19952897,3_19952479,3_19951545,3_19952062	0.0346,0.0104,0.00397,0.019,0.00205,0.00314,0.00109	5.81,17.1,15.7,12.7,3.99,13.3,4.05	9.28e-67,9.39e-14,3.72e-09,1.39e-05,0.000298,0.000394,0.000558	A:G,A:G,A:G,A:G,A:G,A:G,A:G
AT2G35120	GDH2	-	AT2G35120.1	395.7564918	15	2_14806568,2_14806025,2_14805800,2_14805846,2_14807229,2_14805725,2_14806004,2_14805880,2_14805993,2_14805799,2_14805958,2_14805792,2_14805903,2_14806032,2_14806493	0.0268,0.0116,0.0415,0.022,0.00642,0.0213,0.00243,0.00503,0.00253,0.00634,0.00321,0.00831,0.00175,0.00213,0.00102	4.8,5.12,17.3,16.8,16.3,14.9,14.9,15.6,4.05,14.6,3.66,15,12.5,3.47,13.3	9.73e-67,8.45e-27,2.93e-26,1.41e-22,7.66e-12,1.42e-10,3.82e-09,7.45e-08,1.46e-07,1.02e-05,4.5e-05,0.000154,0.000358,0.000372,0.000847	T:C,T:C,T:C,T:C,T:C,T:C,T:C,T:C,T:C,T:C,T:C,T:C,T:C,T:C,T:C
AT3G60245	RPL37AC	+	AT3G60245.1	4389.1688202	9	3_22269586,3_22269581,3_22269890,3_22269043,3_22269807,3_22269911,3_22269712,3_22269408,3_22269046	0.0332,0.00891,0.111,0.00158,0.00223,0.0655,0.000649,0.000896,0.000446	4.61,5.67,15.4,4.26,14.5,4.61,3.23,3.09,3.56	1.49e-66,3.65e-39,2.75e-19,4.14e-09,1.68e-05,2.32e-05,0.00102,0.00123,0.00713	A:G,A:G,A:G,A:G,A:G,A:G,A:G,A:G,A:G
AT2G05840	PAA2	+	AT2G05840.1,AT2G05840.2,AT2G05840.3	90.9945452,0.6121488,0.386123	5	2_2236106,2_2236008,2_2234731,2_2234605,2_2234772	0.0835,0.0102,0.0094,0.0043,0.00427	7.06,3.73,5.04,14.3,3.83	1.52e-66,1.74e-10,2.81e-08,4.64e-05,0.00234	A:G,A:G,A:G,A:G,A:G
AT3G55460	SCL30	+	AT3G55460.1	54.4546374	20	3_20562793,3_20562602,3_20562538,3_20562539,3_20563063,3_20561345,3_20563216,3_20563567,3_20563440,3_20563069,3_20562644,3_20562542,3_20563310,3_20563190,3_20562569,3_20562630,3_20563066,3_20563024,3_20561368,3_20563403	0.0686,0.0479,0.0678,0.0404,0.0338,0.0201,0.0178,0.0205,0.0163,0.00756,0.00569,0.00831,0.00569,0.00954,0.00505,0.00285,0.00367,0.00289,0.00382,0.00698	5.71,7.68,16.9,5.68,16.9,14,5.85,14.2,16.4,4.14,4.81,14.2,12.3,3.67,14.1,13.3,13.7,13.3,11.6,12.5	1.86e-66,1.64e-54,1.46e-41,1.37e-26,9.95e-25,1.17e-16,1.59e-13,5.39e-11,1.37e-10,7.77e-08,4.84e-07,6.88e-05,7.83e-05,0.000103,0.000361,0.000428,0.000685,0.00154,0.00181,0.00261	A:G,A:G,A:G,A:G,A:G,A:G,A:G,A:G,A:G,A:G,A:G,A:G,A:G,A:G,A:G,A:G,A:G,A:G,A:G,A:G
AT1G08480	SDH6	+	AT1G08480.1	234.8592654	9	1_2685269,1_2685313,1_2684898,1_2685416,1_2685380,1_2685326,1_2684887,1_2685621,1_2685459	0.0781,0.0196,0.00789,0.00805,0.0107,0.00515,0.0043,0.0971,0.00423	18.3,5.64,14.8,14.3,15.3,14.2,3.99,13.6,11.8	1.93e-66,4.68e-24,9.82e-16,1.12e-08,1.24e-07,2.26e-07,5.07e-07,7.63e-06,0.00439	A:G,A:G,A:G,A:G,A:G,A:G,A:G,A:G,A:G
AT4G11420	TIF3A1	-	AT4G11420.1	17.6688512	16	4_6947896,4_6948175,4_6948143,4_6948181,4_6947789,4_6948160,4_6947788,4_6948496,4_6948137,4_6947719,4_6948548,4_6948065,4_6947786,4_6948490,4_6949324,4_6948248	0.217,0.108,0.0795,0.0962,0.0586,0.0184,0.0228,0.0172,0.0109,0.0207,0.00752,0.00616,0.0148,0.00509,0.0094,0.00352	4.32,5.89,16.6,4.69,16.8,5.97,14.3,14.3,15.2,14.2,12.5,13,2.89,12.5,12.7,11.5	2.37e-66,3.81e-58,5.47e-38,8.59e-36,2.02e-31,1.77e-16,1.84e-11,3.75e-09,7.73e-09,2.28e-07,8.8e-05,0.000103,0.000734,0.00123,0.00344,0.006	T:C,T:C,T:C,T:C,T:C,T:C,T:C,T:C,T:C,T:C,T:C,T:C,T:C,T:C,T:C,T:C
AT1G67730	KCR1	+	AT1G67730.1	52.1106742	3	1_25393359,1_25393235,1_25391967	0.133,0.0245,0.0149	5.77,6.02,4.32	1.3e-65,2.99e-16,2.41e-09	A:G,A:G,A:G
AT3G55170	RPL35C	-	AT3G55170.1,AT3G55170.3	183.19456,43.4833082	10	3_20453094,3_20453421,3_20453185,3_20453137,3_20453119,3_20454154,3_20453433,3_20454138,3_20453408,3_20454119	0.179,0.018,0.0163,0.0111,0.012,0.00431,0.00235,0.0027,0.00266,0.0025	8.1,2.7,14.9,14.4,3.69,13.9,14.9,13.2,3.98,12.5	1.58e-65,5.98e-11,6.82e-11,1.61e-07,3.44e-05,9.63e-05,0.00031,0.000646,0.00103,0.00118	T:C,T:C,T:C,T:C,T:C,T:C,T:C,T:C,T:C,T:C
AT1G70770	AT1G70770	-	AT1G70770.1,AT1G70770.2	42.4529214,NA	11	1_26688422,1_26689829,1_26688423,1_26688441,1_26688469,1_26689806,1_26689545,1_26688486,1_26689985,1_26689393,1_26689075	0.193,0.172,0.0974,0.0244,0.0194,0.0077,0.00966,0.00632,0.00472,0.00801,0.00374	8.14,2.02,17.2,15.1,5.19,4.56,4.6,13.1,11.9,14.8,11.7	1.66e-65,1.85e-40,4.03e-34,4.72e-10,1.81e-08,4.75e-06,7.91e-06,0.000226,0.00231,0.00232,0.00234	T:C,T:C,T:C,T:C,T:C,T:C,T:C,T:C,T:C,T:C,T:C
AT4G31120	PMRT15	-	AT4G31120.1,AT4G31120.2	9.6037584,0.2036678	8	4_15132180,4_15132186,4_15132966,4_15136104,4_15133000,4_15133029,4_15132790,4_15136283	0.516,0.0769,0.0354,0.0439,0.0247,0.027,0.0216,0.0131	6.7,14.8,13.5,4.6,13,4.52,12.9,11.8	7.71e-65,1.4e-10,3.53e-08,1.8e-06,2.31e-06,1.5e-05,4.79e-05,0.00857	T:C,T:C,T:C,T:C,T:C,T:C,T:C,T:C
AT3G48140	T24C20_20	+	AT3G48140.1	3790.6495734	9	3_17779417,3_17779444,3_17779274,3_17779400,3_17779406,3_17779447,3_17779271,3_17779357,3_17779157	0.0376,0.0193,0.00452,0.00491,0.00409,0.00393,0.00114,0.000931,0.000492	7.13,17.6,5.75,6.04,15.8,13.8,4.81,4.11,2.9	9.08e-65,6.07e-35,4.62e-26,8.31e-16,8.79e-15,8.56e-07,1.36e-06,0.000521,0.00704	A:G,A:G,A:G,A:G,A:G,A:G,A:G,A:G,A:G
AT5G16550	AT5G16550	+	AT5G16550.1	32.274399	2	5_5406690,5_5406601	0.212,0.026	4.11,14.6	1.11e-64,6.46e-17	A:G,A:G
AT5G54310	AGD5	-	AT5G54310.1	22.0024376	6	5_22057256,5_22057258,5_22058607,5_22057843,5_22057739,5_22057837	0.266,0.0528,0.0185,0.0179,0.00893,0.0192	7.16,5.66,13.9,4.4,13,2.86	1.42e-64,7.19e-12,1.4e-07,7.56e-05,0.000252,0.00185	T:C,T:C,T:C,T:C,T:C,T:C
AT3G52090	NRPB11	-	AT3G52090.1,AT3G52090.2	168.0517362,0.0805058	1	3_19318034	0.129	17	2.93e-64	T:C
AT1G51200	SAP2	+	AT1G51200.1,AT1G51200.2,AT1G51200.3,AT1G51200.4	263.2912438,NA	21	1_18986154,1_18986195,1_18986187,1_18985861,1_18986001,1_18985829,1_18986224,1_18986323,1_18986241,1_18985942,1_18985780,1_18984738,1_18985703,1_18985821,1_18985768,1_18985805,1_18985877,1_18986340,1_18985851,1_18986391,1_18984521	0.165,0.0199,0.0161,0.0285,0.0189,0.0111,0.00903,0.0106,0.00804,0.00907,0.00532,0.00602,0.00438,0.0024,0.00343,0.00166,0.00183,0.00292,0.00421,0.00322,0.00286	3.72,6.11,6.8,4.04,6.57,5.36,5.95,5.05,3.91,3.82,5.3,5.13,15.3,13.5,3.07,14,12.1,4.06,2.07,3.83,3.6	5.92e-64,8.93e-34,5.05e-28,3.26e-27,1.5e-21,1.04e-19,2.67e-15,3.81e-15,7.47e-12,4.58e-10,1.94e-09,3.44e-08,1.78e-07,3.37e-05,0.000156,0.00034,0.000711,0.00138,0.00189,0.00394,0.00782	A:G,A:G,A:G,A:G,A:G,A:G,A:G,A:G,A:G,A:G,A:G,A:G,A:G,A:G,A:G,A:G,A:G,A:G,A:G,A:G,A:G
AT3G49010	RPL13B	-	AT3G49010.1,AT3G49010.4,AT3G49010.5	629.196792,4.2056284,0.169351	15	3_18167057,3_18166957,3_18166827,3_18167032,3_18166833,3_18166870,3_18166950,3_18167026,3_18166978,3_18166935,3_18166983,3_18167440,3_18167137,3_18166871,3_18167831	0.0358,0.0205,0.0488,0.00365,0.0183,0.00654,0.00376,0.00173,0.00247,0.00307,0.00204,0.00076,0.000643,0.00453,0.000847	5.21,16.6,14,3.63,14,14.6,4.65,4.61,15,13.5,4.24,4.13,14.4,3.87,2.64	1.39e-63,2.93e-23,7.69e-10,1.6e-09,9.35e-09,4.39e-06,5.35e-06,5.9e-06,8.61e-06,3.14e-05,0.000178,0.000354,0.00145,0.00233,0.00267	T:C,T:C,T:C,T:C,T:C,T:C,T:C,T:C,T:C,T:C,T:C,T:C,T:C,T:C,T:C
AT5G20020	RAN2	+	AT5G20020.1	289.8734372	27	5_6764142,5_6764149,5_6764393,5_6764174,5_6764242,5_6764394,5_6764064,5_6764089,5_6764344,5_6764145,5_6764091,5_6763411,5_6764188,5_6764185,5_6764146,5_6764439,5_6763374,5_6764339,5_6763557,5_6763545,5_6763361,5_6764200,5_6764382,5_6764129,5_6763535,5_6764392,5_6764191	0.0462,0.0632,0.0373,0.025,0.0392,0.0221,0.00529,0.0078,0.0085,0.00523,0.00621,0.0065,0.00334,0.00289,0.00236,0.00536,0.00185,0.00367,0.00177,0.00225,0.0015,0.00193,0.00274,0.00274,0.00229,0.00335,0.00126	5.41,4.1,17.1,5.56,5.49,16.8,15,4.42,3.3,15.6,4.62,3.46,13.6,13.4,14.5,14.8,14,13.1,4.48,3.81,13.7,4.37,13.8,2.35,2.86,4.17,3.81	1.56e-63,7.03e-62,1.03e-37,3.59e-34,9.43e-34,4.07e-30,8.29e-15,3.91e-14,4.38e-12,8.44e-12,2.57e-11,3.48e-10,9.16e-10,3.82e-09,2.38e-07,3.46e-07,6.13e-07,3.46e-06,1.61e-05,4.01e-05,4.58e-05,6.58e-05,0.000111,0.000174,0.000215,0.00039,0.00289	A:G,A:G,A:G,A:G,A:G,A:G,A:G,A:G,A:G,A:G,A:G,A:G,A:G,A:G,A:G,A:G,A:G,A:G,A:G,A:G,A:G,A:G,A:G,A:G,A:G,A:G,A:G
AT5G03290	IDH5	+	AT5G03290.1	87.726135	6	5_795892,5_794118,5_795800,5_795763,5_794145,5_795432	0.0708,0.00928,0.002,0.00164,0.00464,0.00224	7.11,4.34,14.3,14.4,3.21,3.74	1.83e-63,8.08e-10,4.13e-05,0.000367,0.000403,0.00453	A:G,A:G,A:G,A:G,A:G,A:G
AT3G58610	AT3G58610	+	AT3G58610.1,AT3G58610.2,AT3G58610.3	112.047186,NA	15	3_21674446,3_21674489,3_21673785,3_21674507,3_21674653,3_21674309,3_21674499,3_21674287,3_21673126,3_21674652,3_21673528,3_21673901,3_21672824,3_21674631,3_21673196	0.0689,0.00972,0.00829,0.00679,0.00616,0.00382,0.00464,0.00271,0.00428,0.00273,0.00248,0.00149,0.00229,0.00239,0.00209	3.75,5.54,6.08,16.5,15,3.87,4.35,4.69,3.17,12.8,14.5,13.8,12.3,15.1,3.75	2.65e-63,1.46e-22,8.56e-18,1.41e-13,7.93e-11,3.81e-09,1.11e-08,2.13e-06,0.000128,0.000169,0.000172,0.00023,0.000283,0.00109,0.00976	A:G,A:G,A:G,A:G,A:G,A:G,A:G,A:G,A:G,A:G,A:G,A:G,A:G,A:G,A:G
AT4G33680	DAP	-	AT4G33680.1	28.3249042	5	4_16172324,4_16171846,4_16172325,4_16172067,4_16172240	0.128,0.138,0.165,0.0246,0.0178	4.79,17.2,3.58,15.1,14.6	8.62e-63,3.79e-52,2.59e-46,6.57e-12,1.81e-10	T:C,T:C,T:C,T:C,T:C
AT1G04690	KAB1	+	AT1G04690.1	50.2186756	3	1_1315399,1_1313987,1_1313906	0.104,0.0161,0.0064	16.7,5.57,13	3.08e-62,2.63e-12,0.000394	A:G,A:G,A:G
AT3G46560	TIM9	+	AT3G46560.1	401.3305598	5	3_17139181,3_17139385,3_17139242,3_17139352,3_17139355	0.073,0.0404,0.0112,0.0151,0.00423	7.01,15.1,4.22,15.8,13.3	4.72e-62,1.01e-16,1.44e-11,5.33e-09,0.000556	A:G,A:G,A:G,A:G,A:G
AT4G34450	AT4G34450	+	AT4G34450.1	37.3684912	8	4_16476814,4_16476846,4_16476675,4_16476778,4_16475163,4_16475411,4_16476681,4_16473047	0.0628,0.0454,0.019,0.0115,0.00654,0.00492,0.00222,0.00883	6.99,15.5,5.09,5.63,13.8,12.6,3.71,3.54	5.37e-62,3.86e-31,1.55e-23,6.79e-12,2e-06,0.000393,0.00609,0.00852	A:G,A:G,A:G,A:G,A:G,A:G,A:G,A:G
AT4G32390	AT4G32390	+	AT4G32390.1	41.714863	2	4_15637781,4_15636587	0.149,0.0143	7.17,3.39	7.45e-62,1.44e-06	A:G,A:G
AT5G22440	RPL10AC	-	AT5G22440.1,AT5G22440.2	164.882586,NA	28	5_7436057,5_7436070,5_7435627,5_7435341,5_7435278,5_7435890,5_7436086,5_7435898,5_7435861,5_7435773,5_7435368,5_7435300,5_7435633,5_7436058,5_7435820,5_7436132,5_7435809,5_7435481,5_7435538,5_7435586,5_7435869,5_7435888,5_7436063,5_7435774,5_7436168,5_7435283,5_7435845,5_7435484	0.066,0.0366,0.0327,0.0156,0.022,0.0118,0.0156,0.0166,0.00789,0.00937,0.00564,0.00807,0.00638,0.00353,0.00349,0.00268,0.00286,0.00345,0.00366,0.0046,0.00281,0.00499,0.0029,0.00201,0.00171,0.0028,0.00291,0.00218	5.38,4.28,4.41,6.63,15.8,6.32,4.1,6.31,14.8,5.61,16.2,14.9,14.6,15,13.7,3.69,14.8,4.57,4.34,4.46,13.7,3.44,4.16,12.3,12.4,3.84,3.68,3.82	9.49e-62,2.37e-44,8.77e-37,2.48e-25,2.83e-21,7.36e-20,2.58e-19,1.85e-18,4.91e-14,7.54e-12,7.6e-11,2.32e-10,7.46e-10,4.21e-07,2.05e-06,1.38e-05,1.61e-05,2.36e-05,3.47e-05,7.29e-05,7.97e-05,8.42e-05,0.000527,0.000582,0.000826,0.00313,0.0036,0.00418	T:C,T:C,T:C,T:C,T:C,T:C,T:C,T:C,T:C,T:C,T:C,T:C,T:C,T:C,T:C,T:C,T:C,T:C,T:C,T:C,T:C,T:C,T:C,T:C,T:C,T:C,T:C,T:C
AT3G15640	COX5B-1	+	AT3G15640.1,AT3G15640.2	176.5324722,7.338946	9	3_5299685,3_5301350,3_5301114,3_5299391,3_5301364,3_5301529,3_5299350,3_5299996,3_5299731	0.261,0.0167,0.00866,0.00717,0.00461,0.00808,0.00469,0.00275,0.00372	2.98,4.47,16.3,14.1,15.8,12.8,4.6,13.8,2.92	1.2e-61,5.67e-25,9.78e-12,5.86e-10,3.19e-08,7.12e-07,5.11e-06,0.000467,0.0076	A:G,A:G,A:G,A:G,A:G,A:G,A:G,A:G,A:G
AT1G02780	RPL19A	-	AT1G02780.1	982.5464728	18	1_608073,1_608097,1_608274,1_608588,1_608261,1_608110,1_608108,1_608640,1_608818,1_608128,1_608559,1_608283,1_608404,1_608421,1_608117,1_608673,1_607959,1_608437	0.0276,0.00928,0.00755,0.0039,0.00366,0.00342,0.00647,0.0048,0.003,0.00344,0.00179,0.00239,0.00149,0.00164,0.000886,0.00108,0.00233,0.000629	6.9,5.73,4.29,17.1,5.18,15.5,5.02,3.97,3.92,3.56,4.43,3.66,5.07,3.11,4.37,2.67,3.86,2.94	1.29e-61,4.59e-37,2.57e-31,4.05e-27,1.52e-26,1.16e-21,3.14e-20,2.65e-18,4.02e-14,6.92e-14,7.73e-10,6.44e-09,3.15e-08,1.84e-07,5.88e-05,0.00044,0.00267,0.00439	T:C,T:C,T:C,T:C,T:C,T:C,T:C,T:C,T:C,T:C,T:C,T:C,T:C,T:C,T:C,T:C,T:C,T:C
AT5G09510	RPS15D	-	AT5G09510.1,AT5G09510.2	304.9255178,0	11	5_2956398,5_2955660,5_2955748,5_2955553,5_2955785,5_2955765,5_2956211,5_2955756,5_2955520,5_2956409,5_2956308	0.0238,0.024,0.00903,0.0412,0.00555,0.0055,0.00185,0.00288,0.0295,0.00123,0.00119	5.87,5.31,5.61,14.4,4.1,3.95,4.27,13.4,13.9,12.9,12.1	1.69e-61,4.73e-19,2.87e-12,1.48e-10,2.12e-07,1.48e-06,9.04e-05,0.000138,0.000274,0.00166,0.00451	T:C,T:C,T:C,T:C,T:C,T:C,T:C,T:C,T:C,T:C,T:C
AT1G33120	RPL9B	+	AT1G33120.1	444.4804582	20	1_12011575,1_12011610,1_12012217,1_12011624,1_12012153,1_12012216,1_12011323,1_12012230,1_12012191,1_12011250,1_12012168,1_12011537,1_12011625,1_12012213,1_12011539,1_12012156,1_12011604,1_12011605,1_12011587,1_12011295	0.023,0.00823,0.0088,0.0062,0.00812,0.00584,0.0125,0.00503,0.00288,0.0221,0.00595,0.00686,0.00538,0.003,0.00587,0.00364,0.00198,0.00173,0.00146,0.00467	5.98,6.01,5.62,3.79,5.21,15.8,4.1,4.78,15.2,5.6,2.24,4.05,2.57,5.25,3.83,2.53,3.73,14.1,4.44,3.23	1.73e-61,9.92e-33,4.35e-24,2.02e-19,5.17e-18,4.61e-17,8.22e-14,5.51e-13,1.9e-11,2.36e-11,1.35e-10,2.23e-10,2.16e-09,2.62e-09,2.83e-09,1.35e-07,1.8e-05,2.6e-05,4.1e-05,0.00198	A:G,A:G,A:G,A:G,A:G,A:G,A:G,A:G,A:G,A:G,A:G,A:G,A:G,A:G,A:G,A:G,A:G,A:G,A:G,A:G
AT2G33040	ATPC	-	AT2G33040.1	288.3774468	15	2_14019096,2_14019060,2_14019142,2_14020254,2_14019045,2_14019329,2_14018749,2_14019374,2_14019037,2_14018758,2_14018918,2_14019806,2_14019018,2_14020029,2_14019322	0.0194,0.017,0.00508,0.00893,0.00248,0.00258,0.0152,0.00247,0.00214,0.0133,0.00155,0.00178,0.00116,0.00174,0.00142	6.93,5.11,4.84,2.03,14.6,4.96,14.4,4.8,3.21,13.6,12.9,3.28,4,3.16,3.97	2.29e-61,1.35e-24,1.41e-13,6.77e-10,1.74e-09,1.38e-07,3.85e-06,4.76e-06,2.09e-05,3.38e-05,0.000541,0.000626,0.00109,0.00146,0.00426	T:C,T:C,T:C,T:C,T:C,T:C,T:C,T:C,T:C,T:C,T:C,T:C,T:C,T:C,T:C
AT5G36230	AT5G36230	+	AT5G36230.1,AT5G36230.2	67.7743896,0.142002	11	5_14275208,5_14276083,5_14276504,5_14276858,5_14276832,5_14276429,5_14276406,5_14273956,5_14275258,5_14276479,5_14276467	0.123,0.0536,0.00998,0.0166,0.0115,0.00304,0.00209,0.00312,0.0043,0.00254,0.00324	8.06,6.83,4.44,14,13.5,12.9,13,12.7,13.9,13.2,2.95	3.15e-61,7.52e-54,5.71e-09,9.13e-08,1.61e-07,2.32e-05,0.000492,0.000523,0.00062,0.000957,0.00973	A:G,A:G,A:G,A:G,A:G,A:G,A:G,A:G,A:G,A:G,A:G
AT1G49140	AT1G49140	-	AT1G49140.1,AT1G49140.2	567.3568326,NA	5	1_18177717,1_18176948,1_18177705,1_18177708,1_18178007	0.0929,0.0288,0.0112,0.00654,0.00308	6.42,6.4,6.11,5.39,3.65	6.8e-61,1.51e-19,1.06e-17,2.05e-10,2.65e-05	T:C,T:C,T:C,T:C,T:C
AT5G67500	VDAC2	+	AT5G67500.3,AT5G67500.1,AT5G67500.2	111.1705014,0.1522788,0.0492696	7	5_26937078,5_26936906,5_26936601,5_26937071,5_26937196,5_26937126,5_26936256	0.0695,0.00808,0.00668,0.00495,0.00846,0.0037,0.00194	8.13,14.2,13.9,14.2,12.9,13.8,14.1	1.33e-60,2.43e-11,1.5e-08,1.07e-06,2.8e-06,0.000393,0.000527	A:G,A:G,A:G,A:G,A:G,A:G,A:G
AT2G32060	RPS12C	-	AT2G32060.1,AT2G32060.2,AT2G32060.3	504.3540358,NA	13	2_13639608,2_13639591,2_13639714,2_13639250,2_13639247,2_13639448,2_13639233,2_13639466,2_13639585,2_13639609,2_13639592,2_13639410,2_13639216	0.0248,0.0101,0.00898,0.00451,0.00335,0.00438,0.00246,0.00171,0.00231,0.00154,0.00255,0.00102,0.00253	6.97,17.1,5.51,15.9,13.6,2.41,4.78,13.5,3.28,12.6,2.59,13.4,2.66	2.1e-60,9.21e-31,6.34e-21,4.18e-14,1.61e-10,6.45e-07,1.28e-06,2.75e-06,2.98e-05,0.000138,0.000379,0.00308,0.00517	T:C,T:C,T:C,T:C,T:C,T:C,T:C,T:C,T:C,T:C,T:C,T:C,T:C
AT5G08040	TOM5	-	AT5G08040.1	798.3388534	8	5_2577322,5_2577287,5_2577288,5_2577355,5_2577352,5_2577325,5_2577323,5_2577328	0.589,0.0743,0.0223,0.00579,0.00433,0.0047,0.00385,0.00305	2.9,18.1,16.3,4.26,3.87,14.3,13.7,13.4	2.24e-60,2.45e-57,6.56e-22,7.93e-09,1.85e-06,2.8e-06,4.68e-06,3.4e-05	T:C,T:C,T:C,T:C,T:C,T:C,T:C,T:C
AT4G09830	AT4G09830	+	AT4G09830.1	82.2612294	8	4_6190391,4_6188910,4_6190373,4_6190413,4_6190372,4_6190422,4_6190152,4_6190349	0.0818,0.0272,0.0132,0.0105,0.00951,0.00761,0.00341,0.00366	6.04,16,5.38,15.3,13.1,4.53,13.1,13.8	2.78e-60,2.77e-20,8.19e-10,2.51e-08,4.47e-06,3.72e-05,0.00117,0.00132	A:G,A:G,A:G,A:G,A:G,A:G,A:G,A:G
AT1G22780	RPS18A	+	AT1G22780.1	402.3314708	8	1_8069097,1_8068755,1_8068298,1_8068270,1_8069135,1_8068269,1_8068656,1_8069081	0.044,0.00573,0.00468,0.0097,0.00762,0.00302,0.00223,0.00133	18.8,4.96,14.8,4.47,14.2,14.7,13.8,3.68	5.51e-60,3.9e-15,5.32e-15,6.11e-14,8.44e-10,2.5e-09,3.92e-07,0.0068	A:G,A:G,A:G,A:G,A:G,A:G,A:G,A:G
AT5G64200	SC35	-	AT5G64200.1,AT5G64200.2	26.8419914,NA	3	5_25681794,5_25682145,5_25681770	0.2,0.0123,0.015	6.39,14,12.3	9.59e-60,1.19e-07,0.00131	T:C,T:C,T:C
AT4G22310	MPC4	+	AT4G22310.1	464.3370718	17	4_11791933,4_11792671,4_11792410,4_11792666,4_11792730,4_11792651,4_11792665,4_11791477,4_11792177,4_11792729,4_11792664,4_11792711,4_11792700,4_11792215,4_11792192,4_11792699,4_11792697	0.0462,0.122,0.00879,0.0115,0.0169,0.0182,0.0147,0.00443,0.00315,0.00852,0.0058,0.00891,0.00969,0.00275,0.00128,0.00327,0.00562	5.88,18.3,16.4,15.4,13.9,5.51,15.1,15.7,14.9,15,14.4,15,14.5,4.44,12.1,13.6,2.81	2.54e-59,7.01e-59,2.89e-18,5.53e-11,5.35e-10,6.97e-10,9.51e-10,3.09e-08,3.46e-07,1.05e-06,3.14e-06,4.19e-06,2.21e-05,4.71e-05,0.000666,0.0014,0.00143	A:G,A:G,A:G,A:G,A:G,A:G,A:G,A:G,A:G,A:G,A:G,A:G,A:G,A:G,A:G,A:G,A:G
AT4G34620	SSR16	-	AT4G34620.1	349.5112548	20	4_16535845,4_16535159,4_16535174,4_16535036,4_16535967,4_16535085,4_16535237,4_16535212,4_16535128,4_16535855,4_16535177,4_16534947,4_16536082,4_16535084,4_16535059,4_16535063,4_16535999,4_16535962,4_16535998,4_16535142	0.0443,0.0652,0.0192,0.024,0.00726,0.0151,0.00408,0.00366,0.00704,0.00317,0.00301,0.029,0.00989,0.00512,0.00647,0.0056,0.00269,0.00204,0.00158,0.00254	6.26,8.08,6.1,15.1,3.92,4.64,14.3,14.2,14.8,15.3,13.5,13.4,13.7,14.3,12.6,12.4,13.6,3.39,11.9,3.83	3.21e-59,7.25e-56,1.54e-32,5.74e-13,5.15e-11,7.45e-11,7.4e-10,5.69e-09,5.6e-08,3.24e-07,3.62e-06,4.77e-06,6.63e-06,1.86e-05,2.32e-05,5.41e-05,8.15e-05,0.000383,0.0018,0.00415	T:C,T:C,T:C,T:C,T:C,T:C,T:C,T:C,T:C,T:C,T:C,T:C,T:C,T:C,T:C,T:C,T:C,T:C,T:C,T:C
AT5G20720	CPN21	+	AT5G20720.1,AT5G20720.2,AT5G20720.3,AT5G20720.4	183.6965996,NA	15	5_7015059,5_7016311,5_7015015,5_7015103,5_7015891,5_7015613,5_7016207,5_7015600,5_7015738,5_7015014,5_7015627,5_7014702,5_7016189,5_7015136,5_7015035	0.0462,0.0793,0.0102,0.0045,0.00443,0.00274,0.00332,0.00628,0.00243,0.00341,0.00253,0.012,0.00192,0.00307,0.00211	4.41,3.64,5.48,3.48,3.28,15.2,4.76,2.78,14.6,3.89,3.22,11.9,3.2,3.12,2.69	3.66e-59,1.15e-57,1.42e-11,6.25e-09,7.31e-07,9.38e-07,4.33e-06,1.11e-05,1.17e-05,0.00155,0.00181,0.00216,0.00266,0.00475,0.00861	A:G,A:G,A:G,A:G,A:G,A:G,A:G,A:G,A:G,A:G,A:G,A:G,A:G,A:G,A:G
AT2G19520	MSI4	+	AT2G19520.1	16.7143932	7	2_8459279,2_8457268,2_8459166,2_8457915,2_8459146,2_8459201,2_8456278	0.135,0.119,0.0249,0.0297,0.0114,0.00762,0.00952	17.1,4.96,4.28,4.82,4.19,13.4,12.8	5.48e-59,1.47e-22,3.98e-08,5.45e-07,0.000418,0.000708,0.00513	A:G,A:G,A:G,A:G,A:G,A:G,A:G
AT1G09690	RPL21A	-	AT1G09690.1	1149.5102854	15	1_3136642,1_3136657,1_3136646,1_3136472,1_3136340,1_3136353,1_3137369,1_3136570,1_3136429,1_3136510,1_3136364,1_3136411,1_3136576,1_3137285,1_3136460	0.0246,0.0167,0.00468,0.0103,0.0206,0.0176,0.00584,0.00216,0.00247,0.0014,0.00236,0.00163,0.00205,0.000571,0.00108	5.61,5.64,5.95,4.35,15.6,17.9,4.51,4.13,4.89,4.61,14.6,14,1.72,2.58,3.06	8.03e-59,3.84e-57,7.71e-34,2.68e-31,6.33e-26,6.94e-24,1.12e-21,3.58e-11,2.76e-07,7.19e-06,2.46e-05,2.95e-05,0.000263,0.00283,0.00313	T:C,T:C,T:C,T:C,T:C,T:C,T:C,T:C,T:C,T:C,T:C,T:C,T:C,T:C,T:C
AT1G44835	AT1G44835	+	AT1G44835.1,AT1G44835.2	14.9907218,0.0278448	4	1_16942368,1_16941751,1_16942394,1_16941989	0.336,0.0904,0.0253,0.0202	17.3,6.23,13.1,4.09	1.46e-58,1.44e-17,0.00068,0.00104	A:G,A:G,A:G,A:G
AT3G06720	IMPA1	+	AT3G06720.1,AT3G06720.2	24.2730428,NA	2	3_2123707,3_2121017	0.225,0.0327	3.95,5.58	1.57e-58,6.93e-12	A:G,A:G
AT4G34180	AT4G34180	-	AT4G34180.1	162.4095626	24	4_16370566,4_16370110,4_16369982,4_16370168,4_16370056,4_16369979,4_16370555,4_16370093,4_16369938,4_16370551,4_16370141,4_16370631,4_16370584,4_16370392,4_16371059,4_16370614,4_16370105,4_16370568,4_16369937,4_16369935,4_16370160,4_16370627,4_16371200,4_16371152	0.0341,0.0354,0.0669,0.0264,0.0337,0.0314,0.00983,0.0167,0.0263,0.0131,0.0049,0.0112,0.00512,0.00407,0.00267,0.00421,0.00399,0.00278,0.00784,0.011,0.00263,0.00375,0.00265,0.0038	18.5,7.6,17.3,7.2,5.49,16.8,16.6,4.83,5.16,5.57,14.2,15.2,5.01,4.85,13.7,14,2.93,13.4,12.8,4.46,3.29,3.31,3.88,2.56	2.82e-58,1.34e-42,4.42e-41,2.23e-33,4.23e-31,2.37e-20,6.19e-19,1.68e-18,3.9e-16,7.14e-10,8.52e-10,1.84e-08,3.73e-08,1.54e-06,2.76e-05,3.31e-05,4.63e-05,0.000149,0.000221,0.000379,0.000944,0.00098,0.00401,0.00689	T:C,T:C,T:C,T:C,T:C,T:C,T:C,T:C,T:C,T:C,T:C,T:C,T:C,T:C,T:C,T:C,T:C,T:C,T:C,T:C,T:C,T:C,T:C,T:C
AT1G53850	PAE1	-	AT1G53850.1,AT1G53850.2	61.8194796,NA	3	1_20104553,1_20104520,1_20104296	0.0609,0.0258,0.0188	17.2,5.23,5.66	3.16e-58,4.16e-18,1.49e-12	T:C,T:C,T:C
AT2G24765	ARF3	+	AT2G24765.1,AT2G24765.2	89.9915372,0.7900114	12	2_10562789,2_10564768,2_10564736,2_10563216,2_10564769,2_10563208,2_10563213,2_10562766,2_10565098,2_10564979,2_10564996,2_10562771	0.225,0.0275,0.0198,0.00995,0.0125,0.00886,0.00948,0.0209,0.0327,0.0112,0.0142,0.00986	2.83,6.08,6.03,13.6,15.5,5.07,4.98,12.7,13.4,13.9,14.2,3.66	4.44e-58,1.09e-15,3.08e-15,1.34e-08,3.13e-08,4.12e-08,1.95e-07,1e-06,2.38e-05,3.71e-05,0.000324,0.00552	A:G,A:G,A:G,A:G,A:G,A:G,A:G,A:G,A:G,A:G,A:G,A:G
AT2G21170	TIM	-	AT2G21170.1,AT2G21170.2,AT2G21170.3	95.2016052,0.8983824,NA	22	2_9071668,2_9071661,2_9071018,2_9071030,2_9072913,2_9071063,2_9072487,2_9071833,2_9071619,2_9071895,2_9071418,2_9071725,2_9071228,2_9071059,2_9071231,2_9071832,2_9072383,2_9071427,2_9072480,2_9071061,2_9072075,2_9071645	0.0641,0.0391,0.0412,0.0368,0.0173,0.0162,0.0205,0.0127,0.0168,0.0176,0.0101,0.00616,0.00765,0.00457,0.00353,0.0131,0.00304,0.00649,0.00643,0.00316,0.00385,0.00251	4.92,5.57,16.7,16.5,6.71,15.9,4.68,5.92,5.99,14.4,5.6,14.9,4.1,14.1,13.7,2.92,13.4,3.16,2.24,14,2.97,3.63	4.45e-58,2.96e-47,7.28e-41,4.81e-40,1.06e-28,1.56e-24,2.83e-24,1.15e-15,3.95e-15,2.14e-12,3.54e-12,5.91e-07,1.18e-06,2.96e-06,5.53e-06,5.59e-06,1.9e-05,6.21e-05,6.23e-05,0.000242,0.00627,0.00675	T:C,T:C,T:C,T:C,T:C,T:C,T:C,T:C,T:C,T:C,T:C,T:C,T:C,T:C,T:C,T:C,T:C,T:C,T:C,T:C,T:C,T:C
AT1G36050	AT1G36050	+	AT1G36050.2,AT1G36050.1	18.2180286,0.0069426	4	1_13452870,1_13453030,1_13452263,1_13450486	0.239,0.024,0.00775,0.0192	5.03,13.1,12.7,2.26	4.93e-58,6.87e-06,1.68e-05,0.00799	A:G,A:G,A:G,A:G
AT5G56940	AT5G56940	+	AT5G56940.1	86.9051698	11	5_23032207,5_23032073,5_23032185,5_23030894,5_23032074,5_23032190,5_23032002,5_23032072,5_23032189,5_23032173,5_23032121	0.217,0.0421,0.0407,0.025,0.0103,0.0215,0.00787,0.00788,0.0155,0.0164,0.0073	16.5,6.7,13.8,5.64,13.1,12.9,4.69,14.8,14.4,4.35,12.7	5.94e-58,2.13e-25,3.02e-13,1.38e-12,1.24e-06,1.76e-06,4.32e-06,1.4e-05,5.99e-05,8.78e-05,0.000433	A:G,A:G,A:G,A:G,A:G,A:G,A:G,A:G,A:G,A:G,A:G
AT1G35580	CINV1	-	AT1G35580.1,AT1G35580.2,AT1G35580.3	78.4487756,NA,0.311942	2	1_13122571,1_13123456	0.119,0.00267	3.54,3.77	6.76e-58,0.00499	T:C,T:C
AT5G27700	RPS21C	-	AT5G27700.1	1624.3444318	21	5_9807880,5_9808073,5_9807569,5_9807490,5_9808041,5_9807550,5_9807807,5_9807473,5_9807824,5_9807546,5_9807566,5_9808006,5_9808044,5_9808043,5_9807556,5_9807563,5_9807582,5_9808063,5_9808029,5_9808037,5_9807798	0.0469,0.0356,0.0248,0.0155,0.013,0.00937,0.00477,0.0104,0.00334,0.00395,0.00272,0.00325,0.00893,0.00433,0.00331,0.00379,0.00164,0.00204,0.00117,0.00182,0.00186	4.08,7.56,7.43,17.7,3.65,5.45,15.5,5.02,5.82,14.7,15.1,14.3,2.83,4.93,2.57,3.17,3.57,14.2,13.8,2.72,2.69	9.32e-58,2.71e-43,2.35e-39,2.22e-28,3.92e-22,3.12e-20,4.81e-18,1.86e-15,8.4e-15,1.52e-11,3.27e-10,5.33e-10,1.02e-09,5.86e-07,4.95e-06,3.77e-05,7.3e-05,0.000137,0.000797,0.00149,0.00305	T:C,T:C,T:C,T:C,T:C,T:C,T:C,T:C,T:C,T:C,T:C,T:C,T:C,T:C,T:C,T:C,T:C,T:C,T:C,T:C,T:C
AT1G25260	AT1G25260	-	AT1G25260.1	62.9833862	8	1_8854394,1_8855334,1_8854395,1_8854190,1_8855016,1_8855153,1_8854830,1_8855165	0.338,0.111,0.0299,0.0271,0.0146,0.0167,0.00769,0.00463	2.16,3.27,16.8,14.6,15,15.3,4.3,13.4	1.59e-57,2.33e-56,3.78e-21,3.37e-15,9.4e-13,1.21e-12,0.000183,0.000615	T:C,T:C,T:C,T:C,T:C,T:C,T:C,T:C
AT4G29390	RPS30C	-	AT4G29390.1	1729.7989454	4	4_14465213,4_14465908,4_14465240,4_14465216	0.0297,0.00329,0.00144,0.00127	6.89,13.4,3.27,3.95	3.47e-57,4.1e-06,0.00104,0.00114	T:C,T:C,T:C,T:C
AT5G47890	AT5G47890	+	AT5G47890.1	746.1001524	14	5_19390394,5_19390402,5_19390357,5_19389009,5_19389003,5_19390398,5_19390378,5_19389013,5_19388878,5_19389030,5_19389093,5_19390309,5_19388840,5_19390366	0.0801,0.0748,0.025,0.00432,0.00351,0.00621,0.00521,0.00292,0.00272,0.00188,0.00332,0.00623,0.00285,0.00164	7.88,8.04,5.57,5.84,14.4,13.9,5.13,15.1,14,3.62,2.28,1.51,2.4,3.76	3.54e-57,3.9e-55,7.73e-32,1.97e-15,4.32e-09,9.82e-09,1.29e-08,2.19e-08,2.14e-07,2.94e-05,0.000178,0.000548,0.00212,0.00407	A:G,A:G,A:G,A:G,A:G,A:G,A:G,A:G,A:G,A:G,A:G,A:G,A:G,A:G
AT3G47836	AT3G47836	-	AT3G47836.1,AT3G47836.2	340.0561282,1.8856912	7	3_17650479,3_17650446,3_17651731,3_17650438,3_17650450,3_17650457,3_17650477	0.101,0.0466,0.0735,0.0232,0.00562,0.00647,0.00443	8.06,17.4,6.2,5.57,13.7,4.48,13.3	4.38e-57,5.44e-33,2.34e-19,7.1e-11,1.42e-05,3.29e-05,0.000313	T:C,T:C,T:C,T:C,T:C,T:C,T:C
AT5G11500	AT5G11500	+	AT5G11500.1,AT5G11500.2	154.4601958,0.476222	6	5_3676810,5_3679027,5_3679249,5_3678167,5_3678956,5_3678249	0.0679,0.00834,0.148,0.00517,0.00392,0.00229	4.29,15.4,13,4.62,4.3,12.9	5.6e-57,8.01e-08,9e-07,1.01e-05,0.000114,0.000628	A:G,A:G,A:G,A:G,A:G,A:G
AT1G64090	RTNLB3	+	AT1G64090.1,AT1G64090.2	113.8344062,0.081247	10	1_23789564,1_23790817,1_23790818,1_23790584,1_23790540,1_23790816,1_23790841,1_23790813,1_23790625,1_23790626	0.035,0.202,0.0643,0.00905,0.0113,0.0355,0.0583,0.0175,0.0027,0.00327	5.04,6.26,5.63,5.44,14.7,13.7,14.5,12.7,13.3,2.92	1.02e-56,4.27e-33,2.51e-11,5.12e-10,5.4e-09,9.56e-07,1.17e-05,0.000308,0.00225,0.00819	A:G,A:G,A:G,A:G,A:G,A:G,A:G,A:G,A:G,A:G
AT3G58500	PP2A3	-	AT3G58500.1	93.5384126	14	3_21635533,3_21638943,3_21635539,3_21635400,3_21638081,3_21638862,3_21638080,3_21636995,3_21638881,3_21635537,3_21636199,3_21635399,3_21635401,3_21635402	0.0741,0.035,0.0286,0.0262,0.0151,0.0155,0.0115,0.0158,0.00642,0.00672,0.012,0.00631,0.00557,0.0043	8.06,6.1,17.2,16.7,5.89,4.31,5.46,3.74,14.3,15.1,2.41,14.6,12.4,3.74	1.26e-56,2.68e-36,3.04e-32,2.23e-22,1.24e-15,3.9e-14,3.91e-11,3.79e-10,1.35e-08,2.13e-08,1.55e-07,1.56e-05,0.00025,0.00383	T:C,T:C,T:C,T:C,T:C,T:C,T:C,T:C,T:C,T:C,T:C,T:C,T:C,T:C
AT2G02760	UBC2	+	AT2G02760.1,AT2G02760.2,AT2G02760.3,AT2G02760.4	144.8877664,NA	3	2_775235,2_774388,2_774653	0.0953,0.0044,0.00435	17.6,13.5,13.5	1.31e-56,4.16e-05,0.000113	A:G,A:G,A:G
AT5G42790	PAF1	-	AT5G42790.1	95.3174762	15	5_17159192,5_17159507,5_17160714,5_17160742,5_17160684,5_17159303,5_17159271,5_17159540,5_17159609,5_17160744,5_17159255,5_17159281,5_17159541,5_17159294,5_17159705	0.122,0.0665,0.0388,0.00915,0.00504,0.00582,0.00522,0.00546,0.00654,0.00414,0.00493,0.0039,0.0027,0.00317,0.00221	16.9,5.81,5.15,5.08,14.1,4.78,13.7,3.61,2.72,14.2,4.09,3.96,12.7,3.75,3.79	1.48e-56,5.79e-54,1.02e-34,1.44e-08,4.44e-08,1.17e-06,8.6e-06,5.36e-05,0.000407,0.000424,0.000608,0.00131,0.00133,0.00424,0.00475	T:C,T:C,T:C,T:C,T:C,T:C,T:C,T:C,T:C,T:C,T:C,T:C,T:C,T:C,T:C
AT5G15610	AT5G15610	+	AT5G15610.2,AT5G15610.1	20.1745416,0.8219414	9	5_5081977,5_5080586,5_5081138,5_5080088,5_5080564,5_5081048,5_5081840,5_5081871,5_5080539	0.183,0.101,0.0318,0.0224,0.0258,0.022,0.00777,0.0109,0.0204	18.2,3.94,14.8,14.1,13,3.13,12.9,3.44,3.16	1.9e-56,4.12e-19,6.5e-12,7.85e-07,3.28e-05,7.49e-05,0.000172,0.000615,0.00168	A:G,A:G,A:G,A:G,A:G,A:G,A:G,A:G,A:G
AT3G22630	PBD1	-	AT3G22630.1	67.9840838	6	3_8010650,3_8009797,3_8009868,3_8010025,3_8009903,3_8010674	0.0513,0.045,0.0184,0.0129,0.00979,0.00463	5,4.91,14,14.9,15.1,13.9	1.99e-56,6.2e-21,2.75e-15,1.16e-13,7.27e-08,1.14e-05	T:C,T:C,T:C,T:C,T:C,T:C
AT4G38510	VHA-B2	-	AT4G38510.5,AT4G38510.1	49.2114522,0	12	4_18011318,4_18012293,4_18012304,4_18011294,4_18011232,4_18011798,4_18011235,4_18011219,4_18013998,4_18014014,4_18014193,4_18013056	0.0588,0.0645,0.0545,0.0205,0.0061,0.0144,0.00763,0.00409,0.00554,0.00389,0.00418,0.0034	17.8,17.9,17.7,4.69,14.5,3.95,3.81,14.3,12.7,13,13,13	2.1e-56,2.42e-34,2.43e-26,2.09e-17,1.59e-06,2.42e-06,1.26e-05,6.88e-05,0.000325,0.000984,0.0013,0.00216	T:C,T:C,T:C,T:C,T:C,T:C,T:C,T:C,T:C,T:C,T:C,T:C
AT3G56340	RPS26C	-	AT3G56340.1	765.6199128	18	3_20893152,3_20893044,3_20892727,3_20893223,3_20892300,3_20892355,3_20892796,3_20892297,3_20892373,3_20893218,3_20892764,3_20893380,3_20892308,3_20893017,3_20893202,3_20892976,3_20892856,3_20892994	0.025,0.00944,0.00908,0.00953,0.0205,0.00667,0.00509,0.00792,0.00412,0.00385,0.00185,0.0164,0.00427,0.00192,0.00266,0.000903,0.00112,0.000788	4.82,4.18,6.65,15,16,5.21,4.24,16.3,5.43,15.1,14.6,3.1,4.12,14.1,3.36,4.16,4.02,3.84	2.64e-56,6.86e-38,1.04e-25,2.2e-22,3.98e-21,8.27e-18,6.87e-17,3.81e-11,7.21e-11,4.83e-10,7.2e-10,1.04e-07,1.15e-07,7.3e-07,0.000155,0.000939,0.00112,0.00546	T:C,T:C,T:C,T:C,T:C,T:C,T:C,T:C,T:C,T:C,T:C,T:C,T:C,T:C,T:C,T:C,T:C,T:C
AT3G53430	RPL12B	-	AT3G53430.1	706.9075628	16	3_19810026,3_19810264,3_19810180,3_19810401,3_19810274,3_19810218,3_19810252,3_19809854,3_19809922,3_19810025,3_19810304,3_19810312,3_19809888,3_19810231,3_19810085,3_19810053	0.0163,0.0579,0.0192,0.0165,0.00843,0.00768,0.00537,0.00822,0.00524,0.0024,0.00248,0.00273,0.00214,0.00113,0.00118,0.00117	6.79,2.96,4.2,5.74,4.43,5.24,5.07,6.37,6.17,4.28,3.17,2.84,14.8,3.43,2.36,2.36	3.2e-56,1.05e-49,9.21e-42,3.52e-41,1.45e-26,3.47e-26,5.73e-25,5.02e-21,2.39e-18,1.14e-08,4.86e-08,2.13e-07,1.85e-06,0.000164,0.00527,0.00546	T:C,T:C,T:C,T:C,T:C,T:C,T:C,T:C,T:C,T:C,T:C,T:C,T:C,T:C,T:C,T:C
AT5G13850	NACA3	+	AT5G13850.1	173.4270376	7	5_4472450,5_4472635,5_4472426,5_4472671,5_4472403,5_4471354,5_4472464	0.0403,0.0787,0.273,0.0102,0.00392,0.00984,0.00155	4.78,6.82,3.45,15.3,5.24,4.84,13.9	4.04e-56,1.41e-50,4.51e-40,4.08e-10,2.46e-09,2.53e-07,0.00128	A:G,A:G,A:G,A:G,A:G,A:G,A:G
AT1G01820	PEX11C	-	AT1G01820.1	40.4992042	4	1_296208,1_296366,1_296376,1_296211	0.129,0.0167,0.0064,0.0109	17.7,14,13.2,3.95	4.53e-56,2.11e-09,0.000577,0.00309	T:C,T:C,T:C,T:C
AT5G67590	FRO1	+	AT5G67590.1	284.4832774	5	5_26959351,5_26959389,5_26959352,5_26959409,5_26958739	0.0373,0.0361,0.0231,0.0123,0.0036	17.5,5.25,5.86,15.9,3.56	9.77e-56,3.99e-37,2.14e-28,2.72e-08,6.28e-07	A:G,A:G,A:G,A:G,A:G
AT1G19660	BBD2	-	AT1G19660.1,AT1G19660.3	29.0116856,0.0590258	2	1_6800179,1_6800180	0.258,0.0255	4.65,13.3	1.48e-55,3.13e-07	T:C,T:C
AT1G79750	NADP-ME4	-	AT1G79750.1	47.2895134	24	1_30007955,1_30007896,1_30009737,1_30007666,1_30008390,1_30007873,1_30008002,1_30007399,1_30009743,1_30010938,1_30011334,1_30010524,1_30007431,1_30007966,1_30011326,1_30009720,1_30007716,1_30009733,1_30008346,1_30007722,1_30009559,1_30008905,1_30010776,1_30010350	0.0576,0.0411,0.0375,0.0293,0.012,0.0125,0.0063,0.0728,0.00901,0.0187,0.0334,0.0122,0.0615,0.00528,0.0122,0.0074,0.00486,0.0033,0.00335,0.00443,0.00464,0.0022,0.00721,0.00448	6.83,17.7,3.42,14.8,5.83,5.51,14,13.3,4.1,3.93,4.53,13.1,15.1,13.7,13,2.47,4.25,12.8,13.6,14.1,14.5,12.9,12.4,11.7	2.08e-55,6.43e-37,1.73e-20,8.06e-20,2.71e-14,7.38e-11,2.82e-08,3.57e-08,7.94e-08,6.39e-07,2.63e-06,7.11e-06,1.08e-05,2e-05,0.000273,0.000315,0.000351,0.000569,0.00128,0.00154,0.00224,0.00257,0.00333,0.0058	T:C,T:C,T:C,T:C,T:C,T:C,T:C,T:C,T:C,T:C,T:C,T:C,T:C,T:C,T:C,T:C,T:C,T:C,T:C,T:C,T:C,T:C,T:C,T:C
AT1G63940	MDAR6	+	AT1G63940.2,AT1G63940.4,AT1G63940.3,AT1G63940.1	89.7515768,0.1282684,0.0395224,0	4	1_23733632,1_23731614,1_23733172,1_23730504	0.0665,0.00413,0.00246,0.00202	16.1,15.6,14.6,12.6	2.16e-55,2.51e-08,2.38e-05,0.00592	A:G,A:G,A:G,A:G
AT4G31300	PBA1	+	AT4G31300.1,AT4G31300.2	120.0192812,0.683193	8	4_15190657,4_15190502,4_15190835,4_15190993,4_15190960,4_15190496,4_15189220,4_15190846	0.114,0.017,0.00824,0.0165,0.00848,0.00422,0.00246,0.00195	4.36,15.2,16.3,5.18,12.9,2.33,13,3.7	2.22e-55,2.28e-25,1.22e-15,7.3e-09,2.5e-07,0.000619,0.000938,0.00518	A:G,A:G,A:G,A:G,A:G,A:G,A:G,A:G
AT5G14800	PROC1	-	AT5G14800.1,AT5G14800.2	69.2087762,0.691335	17	5_4787779,5_4787298,5_4786787,5_4787561,5_4787540,5_4787171,5_4787675,5_4786218,5_4786219,5_4786497,5_4787629,5_4786950,5_4786489,5_4787701,5_4786271,5_4787170,5_4787771	0.112,0.0299,0.031,0.0179,0.0151,0.0361,0.017,0.014,0.013,0.00542,0.00814,0.00909,0.00378,0.00556,0.00431,0.0058,0.0082	5.23,14.8,4.55,15.4,15.7,3.88,3.53,15.8,15.7,4.24,4.94,4.9,13.2,13.6,4.27,4.12,2.71	2.75e-55,1.16e-25,1.46e-20,5.47e-19,3.82e-16,6.93e-15,1.59e-11,4.62e-11,3.75e-10,2.35e-08,9.19e-08,3.67e-07,1.25e-06,2.25e-05,0.00032,0.000503,0.00201	T:C,T:C,T:C,T:C,T:C,T:C,T:C,T:C,T:C,T:C,T:C,T:C,T:C,T:C,T:C,T:C,T:C
AT3G04120	GAPC1	+	AT3G04120.1	1014.7624636	15	3_1082997,3_1083160,3_1082587,3_1082662,3_1082256,3_1081815,3_1083167,3_1082199,3_1082300,3_1082710,3_1083275,3_1083156,3_1082693,3_1083043,3_1081316	0.00837,0.0196,0.0039,0.00259,0.00183,0.00171,0.00143,0.00091,0.000705,0.000382,0.00233,0.000698,0.00111,0.0018,0.000823	4.33,4.82,2.92,3.68,3.5,3.49,3.92,3.06,2.43,12.2,2.73,3.89,2.39,1.21,3.66	3.98e-55,2.56e-48,1.21e-20,1.35e-14,1.16e-12,5.61e-08,1.26e-06,2.26e-06,0.000637,0.00145,0.00147,0.00166,0.0026,0.0079,0.00794	A:G,A:G,A:G,A:G,A:G,A:G,A:G,A:G,A:G,A:G,A:G,A:G,A:G,A:G,A:G
AT5G20890	CCT2	-	AT5G20890.1	70.5987272	10	5_7087043,5_7087424,5_7087138,5_7088109,5_7087134,5_7089182,5_7089645,5_7087093,5_7087377,5_7087847	0.131,0.0283,0.00495,0.00361,0.00391,0.00377,0.0034,0.00232,0.0043,0.00322	4.9,4.95,4.82,4.53,4.23,3.77,12.7,12.5,3.3,12	5.2e-55,1.65e-15,3.87e-06,7.27e-06,0.000186,0.000861,0.000922,0.00111,0.00206,0.0023	T:C,T:C,T:C,T:C,T:C,T:C,T:C,T:C,T:C,T:C
AT5G15200	RPS9B	-	AT5G15200.1,AT5G15200.2	866.3587514,5.884909	13	5_4935981,5_4935795,5_4935166,5_4936351,5_4935708,5_4935167,5_4935099,5_4935954,5_4935952,5_4935783,5_4935709,5_4935231,5_4935197	0.00805,0.0153,0.00692,0.00488,0.00204,0.00149,0.00146,0.00142,0.000958,0.000849,0.000671,0.000547,0.000896	7.61,6.73,5.81,4.25,5.31,4.6,4.29,2.95,15,13.5,3.92,3.67,2.54	6.23e-55,9.02e-48,4.98e-28,5.72e-09,1.76e-08,2.74e-05,0.000138,0.000229,0.000383,9e-04,0.00332,0.00665,0.00815	T:C,T:C,T:C,T:C,T:C,T:C,T:C,T:C,T:C,T:C,T:C,T:C,T:C
AT1G66240	ATX1	-	AT1G66240.2,AT1G66240.1,AT1G66240.3	763.1316586,755.9142454,0.9253596	4	1_24686345,1_24686439,1_24686446,1_24686498	0.0582,0.00828,0.00277,0.00112	6.22,16.7,5.03,13.8	7.19e-55,2.07e-23,2.48e-08,8.39e-06	T:C,T:C,T:C,T:C
AT5G10480	PAS2	-	AT5G10480.1,AT5G10480.3,AT5G10480.2	56.322108,0.050881,0.0323182	5	5_3298034,5_3298283,5_3298031,5_3298040,5_3298096	0.169,0.0593,0.0404,0.0145,0.00807	6.85,5.5,15.2,13.7,13.8	9.9e-55,6.18e-21,1.57e-15,1.53e-05,0.000296	T:C,T:C,T:C,T:C,T:C
AT3G01280	VDAC1	+	AT3G01280.1	250.5593016	22	3_87628,3_87625,3_87605,3_87654,3_87492,3_87765,3_87630,3_87549,3_87036,3_87631,3_87083,3_87487,3_87338,3_87614,3_86605,3_87560,3_86707,3_87640,3_85799,3_87581,3_87399,3_87702	0.0465,0.0189,0.00947,0.00797,0.00714,0.0232,0.00337,0.00288,0.00221,0.0037,0.00177,0.00289,0.0015,0.00272,0.00156,0.004,0.00129,0.00169,0.00137,0.00168,0.00189,0.00261	17.4,5.89,15.2,14.3,3.81,14.4,15.1,4.77,13,13.1,13.5,3.68,14.3,3.54,4.06,2.77,4.09,12.6,3.13,3.95,4,13.3	1.28e-54,9.88e-28,8.72e-24,1.2e-14,5.82e-14,1.11e-10,4.73e-07,1.81e-06,2.91e-06,8.72e-06,1.65e-05,3.22e-05,7.65e-05,0.00015,0.000221,0.000356,0.000428,0.000997,0.0013,0.00164,0.00179,0.00399	A:G,A:G,A:G,A:G,A:G,A:G,A:G,A:G,A:G,A:G,A:G,A:G,A:G,A:G,A:G,A:G,A:G,A:G,A:G,A:G,A:G,A:G
AT5G02870	RPL4D	+	AT5G02870.1,AT5G02870.2	200.1913088,0.0499126	25	5_658310,5_659482,5_658567,5_658592,5_658281,5_658507,5_657940,5_658058,5_659623,5_659480,5_658457,5_658856,5_659547,5_659504,5_659518,5_658570,5_658697,5_659461,5_659444,5_658908,5_658489,5_658665,5_659494,5_658342,5_659546	0.0377,0.0141,0.0137,0.00886,0.00852,0.00855,0.00565,0.00399,0.00986,0.00411,0.00378,0.00336,0.00443,0.0036,0.00297,0.00211,0.00185,0.0013,0.00141,0.00129,0.00278,0.00151,0.00125,0.00171,0.00166	3.85,17.1,6.44,16.8,5.15,5.8,4.23,15.1,14.6,3.87,15.1,5.03,4.89,4.06,3.81,14.3,4.24,12.2,14.2,4.09,3.26,3.82,3.84,3.66,3.45	1.45e-54,2.14e-28,3.89e-21,1.63e-18,3.99e-18,5.71e-14,1.82e-13,2.11e-13,1.24e-09,6.97e-09,8.27e-08,9.69e-08,1.95e-07,3.16e-07,2.09e-05,0.000104,0.000158,0.000199,0.000253,0.000875,0.000989,0.00275,0.00326,0.00533,0.00586	A:G,A:G,A:G,A:G,A:G,A:G,A:G,A:G,A:G,A:G,A:G,A:G,A:G,A:G,A:G,A:G,A:G,A:G,A:G,A:G,A:G,A:G,A:G,A:G,A:G
AT2G32720	CYTB5-B	-	AT2G32720.1,AT2G32720.2	160.8893072,0.6848208	1	2_13877049	0.109	6.87	2.05e-54	T:C
AT4G31700	RPS6A	-	AT4G31700.1,AT4G31700.2	473.6229946,0	25	4_15346268,4_15346230,4_15346284,4_15346359,4_15347076,4_15346283,4_15347068,4_15347564,4_15347085,4_15346368,4_15346531,4_15346285,4_15346540,4_15347585,4_15346325,4_15346358,4_15347110,4_15346355,4_15347591,4_15346377,4_15346684,4_15346768,4_15346674,4_15346536,4_15347075	0.0253,0.0197,0.0122,0.00708,0.00903,0.00687,0.00525,0.00559,0.00193,0.00369,0.00184,0.00305,0.00273,0.0036,0.00146,0.00194,0.00277,0.00148,0.00526,0.00136,0.000729,0.000631,0.000744,0.00127,0.00097	6.25,7.03,15.5,15.6,4.91,6.19,5.91,5.58,4.85,2.78,4.95,4.99,3.18,13.5,13.8,3.66,2.57,4.29,3.01,4.21,14.7,14.4,13.2,3.98,3.87	3.87e-54,2.89e-31,1.2e-26,8.23e-25,3.29e-22,3.52e-18,8.15e-15,1.5e-12,1.61e-08,1.49e-07,1.59e-07,3.51e-07,8.12e-07,1.4e-06,1.92e-05,3.52e-05,5.07e-05,0.000145,0.000158,0.000185,0.000471,0.000638,0.00268,0.00465,0.00503	T:C,T:C,T:C,T:C,T:C,T:C,T:C,T:C,T:C,T:C,T:C,T:C,T:C,T:C,T:C,T:C,T:C,T:C,T:C,T:C,T:C,T:C,T:C,T:C,T:C
AT3G11630	BAS1	+	AT3G11630.1	61.9818984	5	3_3673945,3_3673986,3_3673959,3_3673957,3_3673928	0.111,0.0802,0.0537,0.0252,0.00659	16.9,16.4,6.41,14.6,13.2	4.49e-54,2.14e-31,7.5e-20,2.98e-12,0.000522	A:G,A:G,A:G,A:G,A:G
AT2G05220	RPS17B	-	AT2G05220.1,AT2G05220.2	559.609092,NA	18	2_1894761,2_1894696,2_1894699,2_1894849,2_1894695,2_1894917,2_1894743,2_1894758,2_1894804,2_1894768,2_1894880,2_1895049,2_1894739,2_1894890,2_1894765,2_1895072,2_1894896,2_1895950	0.0588,0.0534,0.0318,0.00889,0.0236,0.00665,0.00435,0.00473,0.00284,0.00378,0.00216,0.00212,0.00294,0.00317,0.00322,0.00171,0.00219,0.0013	6.89,7.22,16.3,6.27,5.84,4.6,14,4.81,4.67,4.62,14.9,14.8,13.9,2.62,3.22,3.27,2.78,12.1	4.78e-54,4.3e-34,2.82e-32,1.35e-18,3.83e-13,1.06e-10,9.24e-08,2.39e-06,4.84e-06,1.26e-05,1.93e-05,2.46e-05,3.14e-05,0.000108,0.000603,0.000691,0.00228,0.00296	T:C,T:C,T:C,T:C,T:C,T:C,T:C,T:C,T:C,T:C,T:C,T:C,T:C,T:C,T:C,T:C,T:C,T:C
AT5G08680	AT5G08680	+	AT5G08680.1	99.604444	13	5_2824831,5_2824137,5_2822400,5_2824666,5_2824127,5_2824682,5_2824658,5_2824674,5_2823729,5_2823876,5_2824110,5_2824626,5_2823066	0.0589,0.0143,0.012,0.00667,0.00512,0.00328,0.00459,0.00434,0.00167,0.00219,0.00257,0.00285,0.00174	17.9,4.84,3.95,16.1,3.91,15,16,3.69,13.9,12.9,3.85,2.17,11.9	5.07e-54,4.84e-20,7.03e-14,3.67e-13,1.08e-06,2.17e-06,9.3e-06,6.37e-05,0.000604,0.00083,0.0025,0.00745,0.00954	A:G,A:G,A:G,A:G,A:G,A:G,A:G,A:G,A:G,A:G,A:G,A:G,A:G
AT3G19910	BBR	+	AT3G19910.1,AT3G19910.2	25.9841672,0.6956106	4	3_6929294,3_6926515,3_6928751,3_6929381	0.154,0.049,0.0183,0.0244	17.4,15.9,14.6,13.1	5.14e-54,3.11e-12,1.44e-07,3.78e-05	A:G,A:G,A:G,A:G
AT4G35450	AKR2	+	AT4G35450.1,AT4G35450.5,AT4G35450.4	61.6390158,0.095416,0	3	4_16841779,4_16841068,4_16841443	0.0694,0.00305,0.00556	7.8,13,3.99	5.58e-54,0.000709,0.00258	A:G,A:G,A:G
AT1G77710	AT1G77710	+	AT1G77710.1	564.3022138	8	1_29206973,1_29206969,1_29206970,1_29207894,1_29207884,1_29206948,1_29206766,1_29207845	0.0198,0.0282,0.0159,0.0431,0.00603,0.00628,0.0018,0.00213	17,7.67,7.09,17.3,13.9,4.03,12.1,3.88	8.78e-54,6.93e-48,4.1e-35,1.81e-32,2.92e-08,2.25e-07,0.00205,0.00272	A:G,A:G,A:G,A:G,A:G,A:G,A:G,A:G
AT3G58730	VHA-D	-	AT3G58730.1	120.8328098	6	3_21718517,3_21718840,3_21718432,3_21718886,3_21718596,3_21718585	0.113,0.0243,0.0148,0.00532,0.00677,0.00285	6.92,6.78,13.8,3.79,4.88,12.8	1.81e-53,2.74e-26,3.14e-10,1.35e-06,2.83e-06,0.00197	T:C,T:C,T:C,T:C,T:C,T:C
AT3G23600	AT3G23600	+	AT3G23600.1,AT3G23600.2	411.7832846,0.5264992	18	3_8475775,3_8475668,3_8475521,3_8475664,3_8475601,3_8475061,3_8475651,3_8475672,3_8475566,3_8475749,3_8474534,3_8475610,3_8475030,3_8475663,3_8475652,3_8475395,3_8474633,3_8475018	0.12,0.02,0.0259,0.0188,0.00514,0.00492,0.003,0.00353,0.00212,0.00481,0.00132,0.00204,0.00128,0.00341,0.00158,0.00214,0.00161,0.00112	17.5,5.59,3.62,17.6,5.88,3.33,12.9,15.6,3.75,13.6,3.25,14.4,4.24,4.26,14,4.43,2.88,3.06	3.13e-53,1.09e-34,2.48e-24,1.06e-22,8.6e-15,5.14e-11,4.53e-07,4.99e-07,1.01e-05,7.91e-05,0.000199,0.000232,0.000587,0.000621,0.000822,0.00143,0.00206,0.00345	A:G,A:G,A:G,A:G,A:G,A:G,A:G,A:G,A:G,A:G,A:G,A:G,A:G,A:G,A:G,A:G,A:G,A:G
AT2G37120	S1FA2	-	AT2G37120.1	327.586873	6	2_15594323,2_15594299,2_15594321,2_15594809,2_15594176,2_15594344	0.0524,0.011,0.00954,0.00603,0.0177,0.00313	17.7,14.7,3.45,14.4,12.5,12.9	5.96e-53,1.56e-09,1.59e-06,6.22e-05,0.000162,0.00301	T:C,T:C,T:C,T:C,T:C,T:C
AT5G16390	BCCP1	-	AT5G16390.1,AT5G16390.2	24.4933174,0	2	5_5361033,5_5362428	0.163,0.0092	7.9,12.9	7.02e-53,0.000284	T:C,T:C
AT3G54640	TSA1	-	AT3G54640.1	101.9663796	4	3_20223346,3_20223348,3_20223433,3_20223347	0.0451,0.00613,0.00282,0.00283	6.19,4.96,13.5,13.9	7.43e-53,3.25e-07,0.000169,0.000581	T:C,T:C,T:C,T:C
AT3G17020	AT3G17020	-	AT3G17020.1,AT3G17020.2	690.227335,125.4514032	3	3_5802882,3_5802612,3_5802624	0.0197,0.107,0.0448	5.81,7.68,6	1.35e-52,2.44e-49,5.17e-14	T:C,T:C,T:C
AT1G49300	RABG3E	+	AT1G49300.1,AT1G49300.2	97.6468284,NA	3	1_18236714,1_18236986,1_18236368	0.0464,0.0112,0.00497	7.76,15.4,13.6	4.58e-52,5.36e-09,1.17e-05	A:G,A:G,A:G
AT4G17520	AT4G17520	+	AT4G17520.1	102.9889446	8	4_9773234,4_9773179,4_9773178,4_9773367,4_9773150,4_9773192,4_9773313,4_9772947	0.082,0.036,0.02,0.0184,0.0045,0.00569,0.00475,0.00242	5.52,17.1,16.2,14.1,13.9,4.83,13.6,3.94	5.31e-52,2.57e-45,3.89e-25,1e-15,2e-07,7.87e-07,1.41e-05,0.00209	A:G,A:G,A:G,A:G,A:G,A:G,A:G,A:G
AT4G38800	MTN1	-	AT4G38800.1	135.6646012	27	4_18113415,4_18113481,4_18114961,4_18114941,4_18114973,4_18114652,4_18113992,4_18113389,4_18114373,4_18113462,4_18113460,4_18114972,4_18113852,4_18115012,4_18114571,4_18114001,4_18114940,4_18114958,4_18114913,4_18114305,4_18114402,4_18113496,4_18113821,4_18114755,4_18115018,4_18115002,4_18114334	0.0529,0.0603,0.0117,0.00932,0.0228,0.0188,0.0213,0.0317,0.0119,0.0179,0.0129,0.00838,0.00887,0.00963,0.0134,0.00626,0.00444,0.00311,0.00466,0.00389,0.00343,0.0034,0.00267,0.0027,0.00299,0.00184,0.00203	5.83,4.63,6.75,15.9,4.73,6.61,6.62,17,4.75,5.3,14.2,5.92,5.79,5.75,4.74,14.6,15.8,14.9,2.67,4.55,4.52,14.2,13.4,4.08,3.03,3.58,3.61	5.62e-52,1.09e-29,6.81e-29,1.37e-24,3.72e-24,9e-23,2.57e-22,9.97e-21,5.87e-18,1.45e-17,1.17e-16,3.95e-16,2.04e-14,4.21e-14,1.8e-11,4.34e-11,1.02e-09,1.65e-08,4e-06,8.1e-06,2.49e-05,3.66e-05,0.000894,0.00102,0.0035,0.00872,0.00908	T:C,T:C,T:C,T:C,T:C,T:C,T:C,T:C,T:C,T:C,T:C,T:C,T:C,T:C,T:C,T:C,T:C,T:C,T:C,T:C,T:C,T:C,T:C,T:C,T:C,T:C,T:C
AT2G30410	TFCA	+	AT2G30410.1,AT2G30410.2,AT2G30410.3	170.3600994,NA	3	2_12960556,2_12959904,2_12959868	0.128,0.0117,0.00348	18.1,4.2,3.85	5.63e-52,1.87e-07,0.00306	A:G,A:G,A:G
AT5G50850	PDH2	+	AT5G50850.1	129.358527	14	5_20693021,5_20693033,5_20693034,5_20693037,5_20693198,5_20693035,5_20693043,5_20693044,5_20693036,5_20693197,5_20693199,5_20693045,5_20691282,5_20690679	0.0529,0.0173,0.0189,0.00602,0.0246,0.0105,0.005,0.00518,0.00494,0.0183,0.0195,0.00341,0.00403,0.00337	6.82,6.63,15.5,13.9,13.1,5.19,13.6,4.88,14.6,14.7,4.61,13.1,3.66,3.21	2.02e-51,4.24e-25,2.74e-18,3.51e-09,2.46e-08,3.48e-08,3.91e-07,5.03e-07,9.38e-07,3.32e-06,1.13e-05,2.73e-05,3.47e-05,0.000807	A:G,A:G,A:G,A:G,A:G,A:G,A:G,A:G,A:G,A:G,A:G,A:G,A:G,A:G
AT5G60360	ALEU	+	AT5G60360.1,AT5G60360.3,AT5G60360.2	167.9303416,35.3176484,0.18088	17	5_24281326,5_24281485,5_24281656,5_24280894,5_24281736,5_24282186,5_24281993,5_24280103,5_24281487,5_24281332,5_24282185,5_24281756,5_24281429,5_24281925,5_24282008,5_24281473,5_24280186	0.0278,0.0102,0.0135,0.0155,0.00676,0.00521,0.00349,0.00307,0.00192,0.00316,0.00181,0.00189,0.00151,0.00123,0.00172,0.00119,0.00111	4.66,6.85,6.81,4.32,4.12,16.2,15.1,15.2,14.3,3.29,13.6,3.12,4.24,4.12,4.1,14,3.75	2.03e-51,2.5e-28,5.29e-25,7.06e-22,5.47e-15,1.85e-13,5.44e-10,1.21e-07,9.17e-07,1.66e-06,2.54e-05,3.67e-05,0.000254,0.000891,0.00129,0.00144,0.00419	A:G,A:G,A:G,A:G,A:G,A:G,A:G,A:G,A:G,A:G,A:G,A:G,A:G,A:G,A:G,A:G,A:G
AT5G65220	RPL29	+	AT5G65220.1	60.2959524	6	5_26062448,5_26062461,5_26062464,5_26062467,5_26062364,5_26061372	0.175,0.0249,0.0234,0.0104,0.00916,0.00693	4.51,14.6,14.5,13.9,13.1,4.13	3.47e-51,2.33e-10,2.2e-09,0.000234,0.000376,0.000493	A:G,A:G,A:G,A:G,A:G,A:G
AT4G14800	PBD2	+	AT4G14800.1,AT4G14800.2	92.2197422,0.7177452	4	4_8500522,4_8500769,4_8500768,4_8501882	0.0792,0.00984,0.0109,0.00731	5.31,3.98,15.2,14.7	4.12e-51,1.57e-10,1.56e-08,3.65e-06	A:G,A:G,A:G,A:G
AT3G24830	RPL13AB	+	AT3G24830.1	695.448036	22	3_9065215,3_9064779,3_9065281,3_9064788,3_9064719,3_9065867,3_9064874,3_9065400,3_9065887,3_9064859,3_9064748,3_9064627,3_9065434,3_9064696,3_9064781,3_9065840,3_9065804,3_9065784,3_9065872,3_9065280,3_9065741,3_9065813	0.0227,0.0211,0.00693,0.00478,0.00936,0.00718,0.00444,0.0035,0.00755,0.00356,0.00622,0.00802,0.00285,0.00276,0.00269,0.00247,0.00135,0.000998,0.00266,0.000761,0.000611,0.00157	4.47,4.6,4.54,6.62,5.57,16.6,6.42,6.34,16.2,6.05,3.3,4.29,2.96,3.94,3.28,4.79,4.41,13.7,4.37,13.5,3.73,2.8	7.17e-51,9.48e-41,4.81e-32,1.64e-25,2.31e-25,1.1e-22,1.58e-22,2.51e-21,5.6e-19,3.39e-16,5.52e-16,1.35e-13,1.14e-10,2.11e-10,1.24e-09,3.01e-06,4.84e-05,8.38e-05,0.000173,0.00392,0.00467,0.00552	A:G,A:G,A:G,A:G,A:G,A:G,A:G,A:G,A:G,A:G,A:G,A:G,A:G,A:G,A:G,A:G,A:G,A:G,A:G,A:G,A:G,A:G
AT2G31390	AT2G31390	-	AT2G31390.1	187.9708216	6	2_13383535,2_13383538,2_13383536,2_13383539,2_13383544,2_13383632	0.0673,0.0474,0.0256,0.0205,0.00992,0.00188	17.4,17.9,16,15.7,14.6,14.2	7.42e-51,3.2e-48,1.57e-26,2.17e-19,1.22e-10,0.000629	T:C,T:C,T:C,T:C,T:C,T:C
AT3G20050	CCT1	-	AT3G20050.1	65.0464758	5	3_6998505,3_6998432,3_6998958,3_6998469,3_7001517	0.0706,0.0464,0.00343,0.00505,0.00362	4.16,15.5,13.6,14.3,13.9	7.78e-51,3.96e-18,1.49e-05,0.000485,0.00183	T:C,T:C,T:C,T:C,T:C
AT2G27720	RPP2A	+	AT2G27720.1,AT2G27720.4,AT2G27720.3,AT2G27720.2	1459.1025198,5.0880608,4.704939,2.2961922	25	2_11819456,2_11818593,2_11819095,2_11819046,2_11819242,2_11818595,2_11818771,2_11818766,2_11819218,2_11819119,2_11819080,2_11819214,2_11819221,2_11819035,2_11818694,2_11819115,2_11819411,2_11819233,2_11819068,2_11819356,2_11819430,2_11819064,2_11819108,2_11819217,2_11819226	0.0337,0.0273,0.00931,0.012,0.00892,0.00531,0.00559,0.00502,0.00262,0.00202,0.00199,0.00194,0.00168,0.00353,0.00196,0.00119,0.00258,0.00175,0.00496,0.00209,0.00175,0.00148,0.000651,0.000868,0.00156	6.09,7.43,5.01,5.34,16.9,14.2,4.03,4.33,4.44,3.9,4.48,4.1,4.75,1.58,14.1,3.53,4.4,2.3,1.19,2.5,14.5,3.23,3.86,3.83,2.47	9.16e-51,2.26e-39,1.21e-38,7.55e-28,1.69e-20,4.75e-15,1.16e-13,8.23e-13,5.22e-10,2.07e-09,1.29e-08,2e-07,2.4e-06,1.47e-05,2.64e-05,2.72e-05,5.97e-05,0.000333,0.000337,0.000506,0.000724,0.00106,0.00231,0.00349,0.00493	A:G,A:G,A:G,A:G,A:G,A:G,A:G,A:G,A:G,A:G,A:G,A:G,A:G,A:G,A:G,A:G,A:G,A:G,A:G,A:G,A:G,A:G,A:G,A:G,A:G
AT1G31910	AT1G31910	+	AT1G31910.1,AT1G31910.2	47.3201622,0.3041852	7	1_11460193,1_11461565,1_11461522,1_11461141,1_11460304,1_11457364,1_11457375	0.0928,0.0118,0.00583,0.00481,0.00807,0.00518,0.00311	4.04,15.6,13.9,13.6,12.7,3.12,12.7	9.79e-51,1.17e-10,1.54e-06,3.03e-05,0.000291,0.00125,0.00154	A:G,A:G,A:G,A:G,A:G,A:G,A:G
AT1G30450	CCC1	+	AT1G30450.1,AT1G30450.4	4.5691872,1.2042878	2	1_10769113,1_10769246	0.323,0.0925	5.83,4.98	1.32e-50,2.16e-06	A:G,A:G
AT1G51590	MNS1	-	AT1G51590.1,AT1G51590.2	8.5502406,1.3746418	4	1_19128468,1_19128525,1_19128316,1_19129293	0.348,0.0674,0.115,0.0531	3.29,16.5,14,3.69	1.53e-50,1.12e-14,2.31e-14,9.35e-05	T:C,T:C,T:C,T:C
AT2G28190	CSD2	+	AT2G28190.1	72.4887984	12	2_12015731,2_12014715,2_12016370,2_12015238,2_12014741,2_12014701,2_12014743,2_12014744,2_12016319,2_12015890,2_12015397,2_12014672	0.0557,0.019,0.0272,0.0103,0.0054,0.00626,0.00654,0.00665,0.0116,0.00422,0.00382,0.00406	6.06,15.4,14.6,5.12,14.2,13.8,3.83,3.74,14,13.3,13.8,3.81	1.59e-50,4.26e-18,2.26e-08,4.14e-08,6.79e-07,8.61e-07,4.64e-06,1.02e-05,7.24e-05,0.000361,0.000414,0.00612	A:G,A:G,A:G,A:G,A:G,A:G,A:G,A:G,A:G,A:G,A:G,A:G
AT1G76860	LSM3B	-	AT1G76860.1	351.9579956	6	1_28855174,1_28855522,1_28855558,1_28855548,1_28855559,1_28854587	0.0655,0.0223,0.00774,0.00449,0.00309,0.0086	4.5,16.2,5.76,4,4.13,13	1.61e-50,1.51e-45,2.3e-13,9.61e-08,0.000422,0.00178	T:C,T:C,T:C,T:C,T:C,T:C
[truncated: 3,110 more rows]

## Sheet: HITS_ECT3-HT_aerial
ID	GENE	TRANSCRIPTS	NAME	STRAND	REF	TARG	PROP	COUNT	log2FC	p-adj
5_17461452	AT5G43460	AT5G43460.1,AT5G43460.2	AT5G43460	+	A	G	0.224754	503	5.55704	7.15877e-94
2_17625649	AT2G42310	AT2G42310.1	AT2G42310	+	A	G	0.139757	438	6.92008	1.72907e-82
5_3570544	AT5G11200	AT5G11200.1,AT5G11200.2,AT5G11200.3	RH15	+	A	G	0.322766	957	4.65224	5.91676e-71
5_6090321	AT5G18380	AT5G18380.1,AT5G18380.2	RPS16C	-	T	C	0.0332949	635	5.38615	2.23848e-66
3_9491332	AT3G25920	AT3G25920.1	RPL15	-	T	C	0.159281	1718	4.88907	3.25997e-66
[truncated: 7,236 more rows]

## Sheet: GENES_ECT3-HT_aerial
GENE	NAME	STRAND	TRANSCRIPTS	TPM	HITS	IDs	PROP	log2FC	p-adj	MISMATCH TYPE
[truncated: 2,448 more rows]
