# Supplementary material for: The YTHDF proteins ECT2 and ECT3 bind largely overlapping target sets and influence target mRNA abundance, not alternative polyadenylation
Source: eLife journal article supplement (doi:10.7554/elife.72377), 2021-09-30
Supplement: supp [file elife-72377-supp-v1.zip › elife_poa_e72377_Supplementary_file_2.xlsx]

## Sheet: Info
Supplementary File 2
HyperTRIBE data comparing editing of ECT2- and ECT3-FLAG-ADAR in single (ect2-1 or ect3-1) and triple (te234) mutant backgrounds from manually dissected root tips and apexes (aerial tissue) of 10-day-old seedlings grown on vertical plates in long days
Sheet type	Description
HITS	All significantly differentially edited sites in triple vs. single mutant background (padj<0.1, log2FoldChange(triple/single) > 0.25 or log2FoldChange(te234/ect3-1) < -0.25). Constrained to sites with A->G (+strand) or T->C (-strand) mismatches significantly edited over FLAG-ADAR controls in at least one of the two backgrounds
GENES	All genes containing significantly differentially edited sites as described above
HITS
Column headers	Description
ID	Chromosome position of each significantly differentially edited site
GENE	AGI (Araport11)
TRANSCRIPTS	Ordered by expression
NAME	Gene name
STRAND	DNA strand, based on annotated gene with highest expression in case of ambiguity
REF	Reference nucleotide (un-fused ADAR control samples)
TARG	Mismatched nucleotide (ECT2/3-ADAR fusion samples)
PROP	Editing proportion in the triple mutant background based on raw reads
COUNT	Raw number of reads covering the position with edited nucleotides in the triple mutant background
log2FC	Modelled log2 fold change (te234 ECT2-FLAG-ADAR vs. ect2-1 ECT2-FLAG-ADAR or te234 ECT3-FLAG-ADAR vs. ect3-1 ECT3-FLAG-ADAR) in editing proportions
p-adj	Adjusted p-value from the model
GENES
Column headers	Description
GENE	AGI (Araport11)
NAME	Gene name
STRAND	DNA strand, based on annotated gene with highest expression in case of ambiguity
TRANSCRIPTS	Ordered by expression
TPM	Expression estimates for each transcript (in the same order as in the preceding TRANSCRIPTS column) in transcripts per million, according to Salmon quantification, averaged over the 5 control samples (free ADAR) in either roots or aerial tissues for either ECT2 or ECT3 HyperTRIBE experiments
HITS	Number of positions significantly differentially edited (in triple vs. single mutant background) per gene
IDs	Chromosome positions of significantly differentially edited sites
PROP	Editing proportions(for each site) in the triple mutant background based on raw reads
log2FC	Modelled log2 fold change (te234 ECT2-FLAG-ADAR vs. ect2-1 ECT2-FLAG-ADAR or te234 ECT3-FLAG-ADAR vs. ect3-1 ECT3-FLAG-ADAR) in editing proportions +ve fold change implies higher edited proportions in the triple mutant background -ve fold change implies higher edited proportions in the single mutant background
p-adj	False Discovery Rate (ordered by lowest to highest, within and across genes)
MISMATCH_TYPE	Restricted to A->G (+ve strand) and T->C (-ve strand)

## Sheet: HITS ECT2 aerial
ID	GENE	TRANSCRIPTS	NAME	STRAND	REF	TARG	PROP	COUNT	log2FC	p-adj
1_12370245	AT1G34030	AT1G34030.1	RPS18A	-	T	C	0.0878728	221	0.361688	0.0601589
1_13209762	AT1G35680	AT1G35680.1	RPL21	+	A	G	0.0384286	674	0.208376	0.0381565
1_17886963	AT1G48410	AT1G48410.1,AT1G48410.3,AT1G48410.2	AGO1	-	T	C	0.0490167	167	0.389796	0.0959397
1_18518317	AT1G50010	AT1G50010.1	TUBA4	+	A	G	0.00753002	116	0.703721	0.0594032
1_18871875	AT1G50920	AT1G50920.1	AT1G50920	+	A	G	0.213509	471	0.375492	0.000787926
1_20716067	AT1G55490	AT1G55490.2,AT1G55490.3,AT1G55490.1,AT1G55490.5,AT1G55490.4	CPN60B1	-	T	C	0.00104399	15	2.2794	0.0909139
1_21431562	AT1G57870	AT1G57870.1,AT1G57870.2,AT1G57870.3,AT1G57870.4	ASK4	-	T	C	0.136029	37	0.534663	0.00453278
1_22053703	AT1G59900	AT1G59900.1	E1 ALPHA	+	A	G	0.488889	770	0.237473	0.000745781
1_22700891	AT1G61520	AT1G61520.1,AT1G61520.3,AT1G61520.2	LHCA3	+	A	G	0.0226552	1243	0.146491	0.00113306
1_26534668	AT1G70410	AT1G70410.2,AT1G70410.3,AT1G70410.1	BCA4	-	T	C	0.0204149	62	1.0261	0.0207367
1_27481041	AT1G73060	AT1G73060.1	LPA3	+	A	G	0.0887809	201	0.473688	0.00194048
1_28594560	AT1G76200	AT1G76200.1	AT1G76200	+	A	G	0.174811	787	0.263437	0.00037425
1_3377049	AT1G10290	AT1G10290.1	DRP2A	+	A	G	0.355606	314	0.399989	0.00193187
1_3383331	AT1G10310	AT1G10310.1	AT1G10310	-	T	C	0.33692	501	0.313489	0.0818572
1_3513734	AT1G10630	AT1G10630.1,AT1G10630.2	ATARFA1F	-	T	C	0.069807	369	0.184818	0.052774
1_3917952	AT1G11650	AT1G11650.2,AT1G11650.1	RBP45B	+	A	G	0.401514	2281	0.0274992	0.0236256
1_4362221	AT1G12800	AT1G12800.1	AT1G12800	-	T	C	0.436934	1545	0.142499	0.0376406
1_4889196	AT1G14320	AT1G14320.1,AT1G14320.2	RPL10A	+	A	G	0.330267	7073	0.171859	3.43236e-07
1_539790	AT1G02560	AT1G02560.1	CLPP5	+	A	G	0.172333	953	0.0975721	0.0147506
1_7018073	AT1G20260	AT1G20260.1	VHA-B3	+	A	G	0.00714286	17	4.06273	0.0375803
1_8270282	AT1G23310	AT1G23310.1,AT1G23310.2	GGAT1	-	T	C	0.0640918	994	0.245913	0.00180727
1_8270424	AT1G23310	AT1G23310.1,AT1G23310.2	GGAT1	-	T	C	0.0172958	263	0.734675	0.00135527
1_8270742	AT1G23310	AT1G23310.1,AT1G23310.2	GGAT1	-	T	C	0.0274688	405	0.393954	0.0177168
1_9206483	AT1G26630	AT1G26630.1,AT1G26630.2	ELF5A-2	+	A	G	0.0529317	1541	0.0976026	0.0144047
2_10243419	AT2G24090	AT2G24090.1	AT2G24090	+	A	G	0.0680676	745	0.111423	0.0560352
2_11492624	AT2G26930	AT2G26930.1	ISPE	-	T	C	0.00581395	14	12.9474	0.0381565
2_133050	AT2G01250	AT2G01250.1,AT2G01250.2	RPL7B	-	T	C	0.110448	1258	0.134224	0.00618139
2_13557948	AT2G31890	AT2G31890.1	ATRAP	-	T	C	0.113636	60	1.12155	0.014489
2_14523432	AT2G34420	AT2G34420.1	LHB1B2	-	T	C	0.00507014	236	0.478277	0.0161925
2_15170286	AT2G36160	AT2G36160.1	RPS14A	+	A	G	0.00831817	32	-1.34565	0.0147506
2_16355546	AT2G39190	AT2G39190.2,AT2G39190.1	ATATH8	+	A	G	0.184372	210	0.457666	0.0317902
2_16709107	AT2G40010	AT2G40010.1	RPP0A	-	T	C	0.196629	140	0.683364	0.0611297
2_18074094	AT2G43560	AT2G43560.1,AT2G43560.2	FKBP16-3	-	T	C	0.0940342	424	0.295879	0.039249
2_6406926	AT2G14910	AT2G14910.1,AT2G14910.2	AT2G14910	-	T	C	0.0878747	129	0.849062	0.000257729
2_9320622	AT2G21870	AT2G21870.1,AT2G21870.2	MGP1	-	T	C	0.0762468	477	0.243788	0.00219878
3_1009679	AT3G03920	AT3G03920.1	AT3G03920	-	T	C	0.13776	1884	0.153568	0.0058329
3_1245775	AT3G04600	AT3G04600.1,AT3G04600.3,AT3G04600.2	AT3G04600	+	A	G	0.50989	464	0.204266	0.0192351
3_14197251	AT3G41762	AT3G41762.1	AT3G41762	-	T	C	0.285817	794	0.287306	0.088215
3_17230970	AT3G46780	AT3G46780.1	PTAC16	+	A	G	0.0787697	630	0.260198	0.0306821
3_17494251	AT3G47470	AT3G47470.1	LHCA4	-	T	C	0.00361072	234	0.457229	0.0176629
3_17494773	AT3G47470	AT3G47470.1	LHCA4	-	T	C	0.00352896	146	0.411897	0.048788
3_18334337	AT3G49430	AT3G49430.1,AT3G49430.7,AT3G49430.6,AT3G49430.2,AT3G49430.4,AT3G49430.5,AT3G49430.3	SR34A	+	A	G	0.416612	1264	0.185282	0.0037348
3_19952703	AT3G53870	AT3G53870.1	RPS3B	+	A	G	0.0293511	384	0.357273	0.0375803
3_21674446	AT3G58610	AT3G58610.2,AT3G58610.1,AT3G58610.3	AT3G58610	+	A	G	0.0676512	907	0.216194	0.000767474
3_21810827	AT3G59020	AT3G59020.2,AT3G59020.1	AT3G59020	-	T	C	0.15019	79	0.683491	0.0984274
3_21995863	AT3G59540	AT3G59540.1	RPL38B	-	T	C	0.244384	2154	0.0739253	0.073486
3_2990344	AT3G09740	AT3G09740.1	SYP71	+	A	G	0.0532258	99	0.974643	0.0164652
3_367295	AT3G02090	AT3G02090.1,AT3G02090.2	MPPBETA	+	A	G	0.17515	585	0.218768	0.0563253
3_6880528	AT3G19820	AT3G19820.2,AT3G19820.1,AT3G19820.3	DIM	-	T	C	0.0547945	540	0.429598	0.000112103
3_9270627	AT3G25520	AT3G25520.1,AT3G25520.3	ATL5	-	T	C	0.473312	7839	0.0836222	0.0015406
4_10504742	AT4G19210	AT4G19210.1	ABCE2	+	A	G	0.0118821	25	1.85501	0.0886231
4_10888499	AT4G20150	AT4G20150.1	AT4G20150	-	T	C	0.00308893	19	1.39753	0.0395227
4_11266724	AT4G21105	AT4G21105.1,AT4G21105.3	AT4G21105	+	A	G	0.0557344	329	0.289002	0.0512237
4_11266799	AT4G21105	AT4G21105.1,AT4G21105.3	AT4G21105	+	A	G	0.214561	834	0.176727	0.0224843
4_11851605	AT4G22505	AT4G22505.1	AT4G22505	-	T	C	0.146022	758	0.592998	2.4365e-05
4_12329560	AT4G23660	AT4G23660.4,AT4G23660.1,AT4G23660.5,AT4G23660.2,AT4G23660.3	PPT1	-	T	C	0.205556	37	1.61486	0.0284446
4_12551926	AT4G24190	AT4G24190.1,AT4G24190.2	SHD	-	T	C	0.233122	663	0.246568	0.00817757
4_12758423	AT4G24750	AT4G24750.1	STR11	-	T	C	0.0661578	156	0.578618	0.0273583
4_12974633	AT4G25370	AT4G25370.1	AT4G25370	+	A	G	0.0572796	347	0.515902	0.00219878
4_12974662	AT4G25370	AT4G25370.1	AT4G25370	+	A	G	0.0734448	268	0.653111	0.0306821
4_12974719	AT4G25370	AT4G25370.1	AT4G25370	+	A	G	0.463757	1222	0.148349	0.0853199
4_13594277	AT4G27090	AT4G27090.1	RPL14B	-	T	C	0.0381656	734	0.230956	0.0369779
4_13852052	AT4G27800	AT4G27800.1,AT4G27800.2,AT4G27800.3	PPH1	-	T	C	0.321168	308	0.323439	0.0179862
4_14110431	AT4G28540	AT4G28540.1	CKL6	+	A	G	0.0938628	52	0.594685	0.0858827
4_14673935	AT4G30010	AT4G30010.1	AT4G30010	+	A	G	0.018965	59	0.863893	0.0192351
4_14674036	AT4G30010	AT4G30010.1	AT4G30010	+	A	G	0.225993	273	0.216314	0.0754362
4_14938637	AT4G30600	AT4G30600.1,AT4G30600.2	AT4G30600	-	T	C	0.20186	217	0.671826	0.00347211
4_15190993	AT4G31300	AT4G31300.1,AT4G31300.3,AT4G31300.2	PBA1	+	A	G	0.052901	93	0.883159	0.0132929
4_16535159	AT4G34620	AT4G34620.1	SSR16	-	T	C	0.0263886	734	0.352394	9.00686e-07
4_16535174	AT4G34620	AT4G34620.1	SSR16	-	T	C	0.00267155	86	0.757995	0.0306821
4_16558591	AT4G34700	AT4G34700.1	CIB22	+	A	G	0.121199	570	0.122924	0.00322096
4_17129483	AT4G36195	AT4G36195.3,AT4G36195.1,AT4G36195.2	AT4G36195	+	A	G	0.0749698	62	1.01456	0.00535814
4_17833541	AT4G37930	AT4G37930.1	SHM1	-	T	C	0.0591138	1162	0.183154	0.0179862
4_18149001	AT4G38920	AT4G38920.1,AT4G38920.2	VHA-C3	+	A	G	0.0592912	179	0.656847	0.00300465
4_6409068	AT4G10340	AT4G10340.1	LHCB5	+	A	G	0.0354488	3047	0.125931	0.0771479
4_8056176	AT4G13940	AT4G13940.1,AT4G13940.2,AT4G13940.3	SAHH1	+	A	G	0.0519614	1114	0.209182	0.000983219
4_8549631	AT4G14960	AT4G14960.2,AT4G14960.1	TUBA6	-	T	C	0.0423385	835	0.344514	0.00104337
4_8549633	AT4G14960	AT4G14960.2,AT4G14960.1	TUBA6	-	T	C	0.0244946	498	0.426263	0.00535814
4_904212	AT4G02060	AT4G02060.1,AT4G02060.2	MCM7	+	A	G	0.244459	375	0.347597	0.0306821
4_9400382	AT4G16720	AT4G16720.1	RPL15A	-	T	C	0.0493261	1270	0.109419	0.0715761
5_13586745	AT5G35360	AT5G35360.1,AT5G35360.3,AT5G35360.2	CAC2	+	A	G	0.0279463	152	0.487463	0.014489
5_13832533	AT5G35630	AT5G35630.3,AT5G35630.1,AT5G35630.2	GLN2	+	A	G	0.0425124	1927	0.191771	6.88314e-06
5_13832762	AT5G35630	AT5G35630.3,AT5G35630.1,AT5G35630.2	GLN2	+	A	G	0.00921109	324	0.457825	0.00104643
5_13833238	AT5G35630	AT5G35630.3,AT5G35630.1,AT5G35630.2	GLN2	+	A	G	0.0168077	280	0.351806	0.0366853
5_18662994	AT5G46020	AT5G46020.1	AT5G46020	-	T	C	0.303491	339	0.32975	0.0376406
5_21355689	AT5G52650	AT5G52650.1	RPS10C	-	T	C	0.0550707	183	0.475438	0.0490611
5_21632679	AT5G53300	AT5G53300.4,AT5G53300.2,AT5G53300.1	UBC10	-	T	C	0.410535	943	0.160214	0.00564106
5_22298008	AT5G54900	AT5G54900.1	RBP45A	+	A	G	0.0349854	60	0.597811	0.038958
5_24290443	AT5G60390	AT5G60390.1,AT5G60390.3,AT5G60390.2	A3	+	A	G	0.0476534	1653	0.192536	0.000259739
5_24336924	AT5G60540	AT5G60540.1	PDX2	-	T	C	0.274457	101	0.538692	0.0060175
5_25554896	AT5G63860	AT5G63860.1	UVR8	-	T	C	0.0147573	38	1.13563	0.0200482
5_26062448	AT5G65220	AT5G65220.1	RPL29	+	A	G	0.469978	6614	0.0989455	0.0588586
5_2828478	AT5G08690	AT5G08690.1	AT5G08690	+	A	G	0.00527506	14	3.86543	0.0634997
5_3083121	AT5G09880	AT5G09880.1	AT5G09880	-	T	C	0.232628	154	0.575601	0.0664765
5_4472426	AT5G13850	AT5G13850.1	NACA3	+	A	G	0.426134	2922	0.135674	1.2712e-05
5_4472450	AT5G13850	AT5G13850.1	NACA3	+	A	G	0.045723	271	0.459735	0.000449449
5_4997019	AT5G15390	AT5G15390.1,AT5G15390.2	AT5G15390	+	A	G	0.254762	214	0.400038	0.0956902
5_6990790	AT5G20660	AT5G20660.1,AT5G20660.2,AT5G20660.3,AT5G20660.4	AT5G20660	+	A	G	0.0369276	25	0.950565	0.0367317
5_7737350	AT5G23060	AT5G23060.1,AT5G23060.2	CAS	-	T	C	0.0250414	272	0.467851	0.0213965
5_8455780	AT5G24690	AT5G24690.1	AT5G24690	-	T	C	0.141616	538	0.218847	0.0766051
5_8456348	AT5G24690	AT5G24690.1	AT5G24690	-	T	C	0.0407512	115	0.500118	0.0957994
5_9079883	AT5G26000	AT5G26000.1,AT5G26000.2	TGG1	-	T	C	0.0307328	791	0.49002	0.00821487
5_9874290	AT5G27850	AT5G27850.2,AT5G27850.1	RPL18C	+	A	G	0.0537883	465	0.329365	0.00193187
5_9874300	AT5G27850	AT5G27850.2,AT5G27850.1	RPL18C	+	A	G	0.0353661	312	0.327117	0.0559276

## Sheet: GENES ECT2 aerial
GENE	NAME	STRAND	TRANSCRIPTS	TPM	HITS	IDs	PROP	log2FC	p-adj	MISMATCH TYPE
AT1G02560	CLPP5	+	AT1G02560.1	285.8272996	1	1_539790	0.172	0.0976	0.0148	A:G
AT1G10290	DRP2A	+	AT1G10290.1	37.2342294	1	1_3377049	0.356	0.4	0.00193	A:G
AT1G10310	AT1G10310	-	AT1G10310.1	34.6662742	1	1_3383331	0.337	0.313	0.0819	T:C
AT1G10630	ATARFA1F	-	AT1G10630.1,AT1G10630.2	94.6514158,0.194185	1	1_3513734	0.0698	0.185	0.0528	T:C
AT1G11650	RBP45B	+	AT1G11650.2,AT1G11650.1	209.2593246,0	1	1_3917952	0.402	0.0275	0.0236	A:G
AT1G12800	AT1G12800	-	AT1G12800.1	108.4775016	1	1_4362221	0.437	0.142	0.0376	T:C
AT1G14320	RPL10A	+	AT1G14320.1,AT1G14320.2	1631.3876864,1.1480098	1	1_4889196	0.33	0.172	3.43e-07	A:G
AT1G20260	VHA-B3	+	AT1G20260.1	70.1325594	1	1_7018073	0.00714	4.06	0.0376	A:G
AT1G23310	GGAT1	-	AT1G23310.1,AT1G23310.2	524.1522916,0.0710472	3	1_8270424,1_8270282,1_8270742	0.0173,0.0641,0.0275	0.735,0.246,0.394	0.00136,0.00181,0.0177	T:C,T:C,T:C
AT1G26630	ELF5A-2	+	AT1G26630.1,AT1G26630.2	1163.6528066,1.3958706	1	1_9206483	0.0529	0.0976	0.0144	A:G
AT1G34030	RPS18A	-	AT1G34030.1	447.2564846	1	1_12370245	0.0879	0.362	0.0602	T:C
AT1G35680	RPL21	+	AT1G35680.1	734.257465	1	1_13209762	0.0384	0.208	0.0382	A:G
AT1G48410	AGO1	-	AT1G48410.1,AT1G48410.3,AT1G48410.2	46.6784822,33.6384926,2.508062	1	1_17886963	0.049	0.39	0.0959	T:C
AT1G50010	TUBA4	+	AT1G50010.1	527.5051636	1	1_18518317	0.00753	0.704	0.0594	A:G
AT1G50920	AT1G50920	+	AT1G50920.1	79.8141178	1	1_18871875	0.214	0.375	0.000788	A:G
AT1G55490	CPN60B1	-	AT1G55490.2,AT1G55490.3,AT1G55490.1,AT1G55490.5,AT1G55490.4	622.6529398,1.121536,0.3002372,0.1758186,0.1651604	1	1_20716067	0.00104	2.28	0.0909	T:C
AT1G57870	ASK4	-	AT1G57870.1,AT1G57870.2,AT1G57870.3,AT1G57870.4	3.015967,2.9831696,2.5091796,0.159237	1	1_21431562	0.136	0.535	0.00453	T:C
AT1G59900	E1 ALPHA	+	AT1G59900.1	71.877593	1	1_22053703	0.489	0.237	0.000746	A:G
AT1G61520	LHCA3	+	AT1G61520.1,AT1G61520.3,AT1G61520.2	2848.6625016,76.415129,21.2857682	1	1_22700891	0.0227	0.146	0.00113	A:G
AT1G70410	BCA4	-	AT1G70410.2,AT1G70410.3,AT1G70410.1	67.103465,12.0856008,0.4783846	1	1_26534668	0.0204	1.03	0.0207	T:C
AT1G73060	LPA3	+	AT1G73060.1	77.7393938	1	1_27481041	0.0888	0.474	0.00194	A:G
AT1G76200	AT1G76200	+	AT1G76200.1	328.3826144	1	1_28594560	0.175	0.263	0.000374	A:G
AT2G01250	RPL7B	-	AT2G01250.1,AT2G01250.2	830.0230168,0.5518104	1	2_133050	0.11	0.134	0.00618	T:C
AT2G14910	AT2G14910	-	AT2G14910.1,AT2G14910.2	50.127116,0.2066872	1	2_6406926	0.0879	0.849	0.000258	T:C
AT2G21870	MGP1	-	AT2G21870.1,AT2G21870.2	340.0036476,0	1	2_9320622	0.0762	0.244	0.0022	T:C
AT2G24090	AT2G24090	+	AT2G24090.1	776.1958844	1	2_10243419	0.0681	0.111	0.056	A:G
AT2G26930	ISPE	-	AT2G26930.1	55.110973	1	2_11492624	0.00581	12.9	0.0382	T:C
AT2G31890	ATRAP	-	AT2G31890.1	23.8743888	1	2_13557948	0.114	1.12	0.0145	T:C
AT2G34420	LHB1B2	-	AT2G34420.1	12177.7308496	1	2_14523432	0.00507	0.478	0.0162	T:C
AT2G36160	RPS14A	+	AT2G36160.1	815.6544552	1	2_15170286	0.00832	-1.35	0.0148	A:G
AT2G39190	ATATH8	+	AT2G39190.2,AT2G39190.1	32.645029,0.908405	1	2_16355546	0.184	0.458	0.0318	A:G
AT2G40010	RPP0A	-	AT2G40010.1	27.7809818	1	2_16709107	0.197	0.683	0.0611	T:C
AT2G43560	FKBP16-3	-	AT2G43560.1,AT2G43560.2	186.8570514,0.7078914	1	2_18074094	0.094	0.296	0.0392	T:C
AT3G02090	MPPBETA	+	AT3G02090.1,AT3G02090.2	170.3471336,0	1	3_367295	0.175	0.219	0.0563	A:G
AT3G03920	AT3G03920	-	AT3G03920.1	359.333292	1	3_1009679	0.138	0.154	0.00583	T:C
AT3G04600	AT3G04600	+	AT3G04600.1,AT3G04600.3,AT3G04600.2	41.7310014,7.4039638,0.0226798	1	3_1245775	0.51	0.204	0.0192	A:G
AT3G09740	SYP71	+	AT3G09740.1	55.3069802	1	3_2990344	0.0532	0.975	0.0165	A:G
AT3G19820	DIM	-	AT3G19820.2,AT3G19820.1,AT3G19820.3	306.4251036,9.6210434,2.1517344	1	3_6880528	0.0548	0.43	0.000112	T:C
AT3G25520	ATL5	-	AT3G25520.1,AT3G25520.3	674.0818492,0.5275738	1	3_9270627	0.473	0.0836	0.00154	T:C
AT3G41762	AT3G41762	-	AT3G41762.1	0.8062608	1	3_14197251	0.286	0.287	0.0882	T:C
AT3G46780	PTAC16	+	AT3G46780.1	569.9840968	1	3_17230970	0.0788	0.26	0.0307	A:G
AT3G47470	LHCA4	-	AT3G47470.1	5654.325725	2	3_17494251,3_17494773	0.00361,0.00353	0.457,0.412	0.0177,0.0488	T:C,T:C
AT3G49430	SR34A	+	AT3G49430.1,AT3G49430.7,AT3G49430.6,AT3G49430.2,AT3G49430.4,AT3G49430.5,AT3G49430.3	81.0496136,2.7907794,1.541236,0.4040562,0.3767258,0.065719,0.0516562	1	3_18334337	0.417	0.185	0.00373	A:G
AT3G53870	RPS3B	+	AT3G53870.1	733.2744052	1	3_19952703	0.0294	0.357	0.0376	A:G
AT3G58610	AT3G58610	+	AT3G58610.2,AT3G58610.1,AT3G58610.3	350.696055,223.8614452,0.221194	1	3_21674446	0.0677	0.216	0.000767	A:G
AT3G59020	AT3G59020	-	AT3G59020.2,AT3G59020.1	26.6108054,0.3605108	1	3_21810827	0.15	0.683	0.0984	T:C
AT3G59540	RPL38B	-	AT3G59540.1	724.5521896	1	3_21995863	0.244	0.0739	0.0735	T:C
AT4G02060	MCM7	+	AT4G02060.1,AT4G02060.2	29.5332998,0	1	4_904212	0.244	0.348	0.0307	A:G
AT4G10340	LHCB5	+	AT4G10340.1	5328.6356994	1	4_6409068	0.0354	0.126	0.0771	A:G
AT4G13940	SAHH1	+	AT4G13940.1,AT4G13940.2,AT4G13940.3	797.2983974,0.092971,0.0776076	1	4_8056176	0.052	0.209	0.000983	A:G
AT4G14960	TUBA6	-	AT4G14960.2,AT4G14960.1	559.2159102,2.4827416	2	4_8549631,4_8549633	0.0423,0.0245	0.345,0.426	0.00104,0.00536	T:C,T:C
AT4G16720	RPL15A	-	AT4G16720.1	1345.4948732	1	4_9400382	0.0493	0.109	0.0716	T:C
AT4G19210	ABCE2	+	AT4G19210.1	73.5276146	1	4_10504742	0.0119	1.86	0.0886	A:G
AT4G20150	AT4G20150	-	AT4G20150.1	218.5929866	1	4_10888499	0.00309	1.4	0.0395	T:C
AT4G21105	AT4G21105	+	AT4G21105.1,AT4G21105.3	198.7875528,0.4082834	2	4_11266799,4_11266724	0.215,0.0557	0.177,0.289	0.0225,0.0512	A:G,A:G
AT4G22505	AT4G22505	-	AT4G22505.1	199.72099	1	4_11851605	0.146	0.593	2.44e-05	T:C
AT4G23660	PPT1	-	AT4G23660.4,AT4G23660.1,AT4G23660.5,AT4G23660.2,AT4G23660.3	2.9403362,1.7282594,0.5663972,0.3484084,0	1	4_12329560	0.206	1.61	0.0284	T:C
AT4G24190	SHD	-	AT4G24190.1,AT4G24190.2	129.99893,14.5287372	1	4_12551926	0.233	0.247	0.00818	T:C
AT4G24750	STR11	-	AT4G24750.1	113.0013218	1	4_12758423	0.0662	0.579	0.0274	T:C
AT4G25370	AT4G25370	+	AT4G25370.1	275.1920268	3	4_12974633,4_12974662,4_12974719	0.0573,0.0734,0.464	0.516,0.653,0.148	0.0022,0.0307,0.0853	A:G,A:G,A:G
AT4G27090	RPL14B	-	AT4G27090.1	2253.3592272	1	4_13594277	0.0382	0.231	0.037	T:C
AT4G27800	PPH1	-	AT4G27800.1,AT4G27800.2,AT4G27800.3	52.937945,3.8608294,0.0317932	1	4_13852052	0.321	0.323	0.018	T:C
AT4G28540	CKL6	+	AT4G28540.1	20.9911974	1	4_14110431	0.0939	0.595	0.0859	A:G
AT4G30010	AT4G30010	+	AT4G30010.1	209.7249246	2	4_14673935,4_14674036	0.019,0.226	0.864,0.216	0.0192,0.0754	A:G,A:G
AT4G30600	AT4G30600	-	AT4G30600.1,AT4G30600.2	36.8765208,0.364689	1	4_14938637	0.202	0.672	0.00347	T:C
AT4G31300	PBA1	+	AT4G31300.1,AT4G31300.3,AT4G31300.2	148.2694994,4.1292266,0	1	4_15190993	0.0529	0.883	0.0133	A:G
AT4G34620	SSR16	-	AT4G34620.1	2314.0551548	2	4_16535159,4_16535174	0.0264,0.00267	0.352,0.758	9.01e-07,0.0307	T:C,T:C
AT4G34700	CIB22	+	AT4G34700.1	417.745703	1	4_16558591	0.121	0.123	0.00322	A:G
AT4G36195	AT4G36195	+	AT4G36195.3,AT4G36195.1,AT4G36195.2	27.076589,2.2991864,2.018419	1	4_17129483	0.075	1.01	0.00536	A:G
AT4G37930	SHM1	-	AT4G37930.1	628.8889696	1	4_17833541	0.0591	0.183	0.018	T:C
AT4G38920	VHA-C3	+	AT4G38920.1,AT4G38920.2	190.194945,0.1482776	1	4_18149001	0.0593	0.657	0.003	A:G
AT5G08690	AT5G08690	+	AT5G08690.1	268.9654688	1	5_2828478	0.00528	3.87	0.0635	A:G
AT5G09880	AT5G09880	-	AT5G09880.1	28.0995422	1	5_3083121	0.233	0.576	0.0665	T:C
AT5G13850	NACA3	+	AT5G13850.1	198.8350772	2	5_4472426,5_4472450	0.426,0.0457	0.136,0.46	1.27e-05,0.000449	A:G,A:G
AT5G15390	AT5G15390	+	AT5G15390.1,AT5G15390.2	29.6635254,0.2680682	1	5_4997019	0.255	0.4	0.0957	A:G
AT5G20660	AT5G20660	+	AT5G20660.1,AT5G20660.2,AT5G20660.3,AT5G20660.4	14.1983262,5.6946626,0.226485,0.1699286	1	5_6990790	0.0369	0.951	0.0367	A:G
AT5G23060	CAS	-	AT5G23060.1,AT5G23060.2	356.9948464,1.8261368	1	5_7737350	0.025	0.468	0.0214	T:C
AT5G24690	AT5G24690	-	AT5G24690.1	158.1707448	2	5_8455780,5_8456348	0.142,0.0408	0.219,0.5	0.0766,0.0958	T:C,T:C
AT5G26000	TGG1	-	AT5G26000.1,AT5G26000.2	1793.7268954,0.055177	1	5_9079883	0.0307	0.49	0.00821	T:C
AT5G27850	RPL18C	+	AT5G27850.2,AT5G27850.1	723.6638856,132.5964276	2	5_9874290,5_9874300	0.0538,0.0354	0.329,0.327	0.00193,0.0559	A:G,A:G
AT5G35360	CAC2	+	AT5G35360.1,AT5G35360.3,AT5G35360.2	180.5093984,0.104715,0.0173114	1	5_13586745	0.0279	0.487	0.0145	A:G
AT5G35630	GLN2	+	AT5G35630.3,AT5G35630.1,AT5G35630.2	805.9349286,737.2195538,0.5547674	3	5_13832533,5_13832762,5_13833238	0.0425,0.00921,0.0168	0.192,0.458,0.352	6.88e-06,0.00105,0.0367	A:G,A:G,A:G
AT5G46020	AT5G46020	-	AT5G46020.1	117.9806644	1	5_18662994	0.303	0.33	0.0376	T:C
AT5G52650	RPS10C	-	AT5G52650.1	456.3966768	1	5_21355689	0.0551	0.475	0.0491	T:C
AT5G53300	UBC10	-	AT5G53300.4,AT5G53300.2,AT5G53300.1	449.4984956,9.1124448,3.1679196	1	5_21632679	0.411	0.16	0.00564	T:C
AT5G54900	RBP45A	+	AT5G54900.1	82.7143884	1	5_22298008	0.035	0.598	0.039	A:G
AT5G60390	A3	+	AT5G60390.1,AT5G60390.3,AT5G60390.2	1656.1097116,1211.2285504,1.077357	1	5_24290443	0.0477	0.193	0.00026	A:G
AT5G60540	PDX2	-	AT5G60540.1	27.9518514	1	5_24336924	0.274	0.539	0.00602	T:C
AT5G63860	UVR8	-	AT5G63860.1	84.7625824	1	5_25554896	0.0148	1.14	0.02	T:C
AT5G65220	RPL29	+	AT5G65220.1	1155.56302	1	5_26062448	0.47	0.0989	0.0589	A:G

## Sheet: HITS ECT3 aerial
ID	GENE	TRANSCRIPTS	NAME	STRAND	REF	TARG	PROP	COUNT	log2FC	p-adj
1_46478	AT1G01080	AT1G01080.1,AT1G01080.3,AT1G01080.2	AT1G01080	-	T	C	0.013544	36	1.33091	0.00331783
1_187341	AT1G01510	AT1G01510.1	AN	+	A	G	0.0400572	28	0.836745	0.0423007
1_323793	AT1G01940	AT1G01940.1	CYP18-1	+	A	G	0.0436409	35	0.912466	0.0473432
1_404268	AT1G02140	AT1G02140.1	MEE63	-	T	C	0.0177011	158	0.419696	0.0329558
1_448700	AT1G02280	AT1G02280.1,AT1G02280.2	TOC33	-	T	C	0.00653595	13	2.22931	0.0584091
1_519351	AT1G02500	AT1G02500.1,AT1G02500.2	SAM1	+	A	G	0.0569001	221	0.438019	0.00756432
1_519354	AT1G02500	AT1G02500.1,AT1G02500.2	SAM1	+	A	G	0.00464516	18	2.09588	0.0211064
1_539000	AT1G02560	AT1G02560.1	CLPP5	+	A	G	0.0145196	94	0.935138	2.55857e-06
1_539007	AT1G02560	AT1G02560.1	CLPP5	+	A	G	0.0067535	42	0.971434	0.0291139
1_539412	AT1G02560	AT1G02560.1	CLPP5	+	A	G	0.018362	113	0.921556	0.00224841
1_539643	AT1G02560	AT1G02560.1	CLPP5	+	A	G	0.00275562	19	1.2683	0.018286
1_539727	AT1G02560	AT1G02560.1	CLPP5	+	A	G	0.00639764	39	0.971588	0.0177597
1_539778	AT1G02560	AT1G02560.1	CLPP5	+	A	G	0.0107606	44	1.02679	0.00424234
1_539790	AT1G02560	AT1G02560.1	CLPP5	+	A	G	0.0544946	234	0.809571	7.40582e-06
1_539799	AT1G02560	AT1G02560.1	CLPP5	+	A	G	0.0118287	50	0.664333	0.0128654
1_539812	AT1G02560	AT1G02560.1	CLPP5	+	A	G	0.0436047	165	0.885236	8.88798e-08
1_539818	AT1G02560	AT1G02560.1	CLPP5	+	A	G	0.240642	900	0.441038	2.22067e-10
1_539832	AT1G02560	AT1G02560.1	CLPP5	+	A	G	0.13984	490	0.555731	4.71191e-07
1_539898	AT1G02560	AT1G02560.1	CLPP5	+	A	G	0.0193717	37	1.64414	0.00113877
1_539903	AT1G02560	AT1G02560.1	CLPP5	+	A	G	0.00938735	19	1.48104	0.0240206
1_608073	AT1G02780	AT1G02780.1	RPL19A	-	T	C	0.0253304	414	0.268686	0.00781847
1_608097	AT1G02780	AT1G02780.1	RPL19A	-	T	C	0.0102861	169	0.579144	5.41695e-06
1_608110	AT1G02780	AT1G02780.1	RPL19A	-	T	C	0.00408606	64	0.681061	0.0459588
1_608274	AT1G02780	AT1G02780.1	RPL19A	-	T	C	0.00638251	146	0.146112	0.00908535
1_899332	AT1G03600	AT1G03600.1	PSB27-1	+	A	G	0.0051628	75	0.53626	0.0304516
1_908185	AT1G03630	AT1G03630.1,AT1G03630.2	PORC	+	A	G	0.0291069	146	0.622741	0.000267038
1_916909	AT1G03680	AT1G03680.1	ATHM1	-	T	C	0.0592824	38	0.876446	0.0647508
1_979517	AT1G03860	AT1G03860.1,AT1G03860.2	PHB2	-	T	C	0.0180723	15	1.4055	0.0628482
1_1056203	AT1G04080	AT1G04080.1,AT1G04080.3,AT1G04080.2,AT1G04080.5	PRP39	+	A	G	0.190691	127	0.742173	5.60201e-05
1_1056212	AT1G04080	AT1G04080.1,AT1G04080.3,AT1G04080.2,AT1G04080.5	PRP39	+	A	G	0.0459418	30	1.23736	0.0021618
1_1056269	AT1G04080	AT1G04080.1,AT1G04080.3,AT1G04080.2,AT1G04080.5	PRP39	+	A	G	0.14966	110	0.644681	0.0673936
1_1097474	AT1G04170	AT1G04170.1,AT1G04170.2	EIF2 GAMMA	+	A	G	0.00533881	13	1.50139	0.0430719
1_1099473	AT1G04170	AT1G04170.1,AT1G04170.2	EIF2 GAMMA	+	A	G	0.0128271	25	1.25433	0.00291371
1_1141834	AT1G04270	AT1G04270.1,AT1G04270.2	RPS15A	-	T	C	0.046196	337	0.383792	5.68896e-11
1_1141982	AT1G04270	AT1G04270.1,AT1G04270.2	RPS15A	-	T	C	0.0683047	884	0.256028	7.4814e-10
1_1142045	AT1G04270	AT1G04270.1,AT1G04270.2	RPS15A	-	T	C	0.00531314	80	0.631903	0.000176907
1_1142748	AT1G04270	AT1G04270.1,AT1G04270.2	RPS15A	-	T	C	0.00490763	106	0.354323	0.0169706
1_1191647	AT1G04420	AT1G04420.1	AT1G04420	+	A	G	0.0261389	35	0.949566	0.0834426
1_1192829	AT1G04420	AT1G04420.1	AT1G04420	+	A	G	0.0321802	80	1.27488	2.62199e-07
1_1193471	AT1G04420	AT1G04420.1	AT1G04420	+	A	G	0.0831012	179	1.09618	1.662e-07
1_1193585	AT1G04420	AT1G04420.1	AT1G04420	+	A	G	0.0636079	122	0.417242	0.00853891
1_1216482	AT1G04480	AT1G04480.1	RPL23C	+	A	G	0.00330137	42	0.538716	0.00132739
1_1217225	AT1G04480	AT1G04480.1	RPL23C	+	A	G	0.067298	334	0.516512	1.95166e-14
1_1217263	AT1G04480	AT1G04480.1	RPL23C	+	A	G	0.0481743	157	0.442454	1.29472e-05
1_1290205	AT1G04630	AT1G04630.1	MEE4	-	T	C	0.0260017	61	0.635646	0.0178841
1_1315399	AT1G04690	AT1G04690.1	KAB1	+	A	G	0.0947437	146	0.474677	0.00427193
1_1322652	AT1G04710	AT1G04710.1	KAT1	+	A	G	0.15508	29	1.01611	0.0426079
1_1354640	AT1G04810	AT1G04810.1	RPN2B	+	A	G	0.15736	62	0.463383	0.00345375
1_1357584	AT1G04820	AT1G04820.1	TUBA4	-	T	C	0.00288152	26	0.402254	0.00592219
1_1399716	AT1G04940	AT1G04940.1	TIC20-I	+	A	G	0.177538	577	0.485978	1.33515e-15
1_1400474	AT1G04940	AT1G04940.1	TIC20-I	+	A	G	0.0168986	34	1.75817	0.00295892
1_1502519	AT1G05190	AT1G05190.1	RPL6	-	T	C	0.0040965	27	2.4063	0.00780522
1_1502525	AT1G05190	AT1G05190.1	RPL6	-	T	C	0.0142394	101	0.562214	0.0221914
1_1502534	AT1G05190	AT1G05190.1	RPL6	-	T	C	0.031639	244	0.352703	0.016632
1_1502801	AT1G05190	AT1G05190.1	RPL6	-	T	C	0.00283342	43	1.10536	0.0288112
1_1503081	AT1G05190	AT1G05190.1	RPL6	-	T	C	0.00508343	85	0.759916	0.0497482
1_1503171	AT1G05190	AT1G05190.1	RPL6	-	T	C	0.00564247	110	1.0054	9.83631e-05
1_2050538	AT1G06690	AT1G06690.1	AT1G06690	-	T	C	0.0578231	51	0.505069	0.0485363
1_2095645	AT1G06820	AT1G06820.1,AT1G06820.4,AT1G06820.2,AT1G06820.3	CRTISO	-	T	C	0.187879	93	1.31684	0.00262141
1_2169548	AT1G07070	AT1G07070.1	RPL35AA	+	A	G	0.045302	54	1.01844	0.00402386
1_2204786	AT1G07180	AT1G07180.1	NDA1	+	A	G	0.0286738	40	1.31293	0.00552112
1_2250183	AT1G07320	AT1G07320.1,AT1G07320.3,AT1G07320.2	RPL4	+	A	G	0.0203077	293	0.241176	0.0468699
1_2250403	AT1G07320	AT1G07320.1,AT1G07320.2	RPL4	+	A	G	0.0708128	115	0.813996	0.00171458
1_2380909	AT1G07700	AT1G07700.1,AT1G07700.3	AT1G07700	+	A	G	0.0545295	62	0.802275	0.00370561
1_2408490	AT1G07770	AT1G07770.1,AT1G07770.2,AT1G07770.3	RPS15AA	-	T	C	0.00471098	63	0.376886	0.0208459
1_2408686	AT1G07770	AT1G07770.1,AT1G07770.2,AT1G07770.3	RPS15AA	-	T	C	0.00802998	105	0.290766	0.0949962
1_2439527	AT1G07890	AT1G07890.1,AT1G07890.6	APX1	+	A	G	0.0115628	62	0.320874	0.00497071
1_2457149	AT1G07920	AT1G07920.1	A3	+	A	G	0.18986	910	0.298061	4.64624e-08
1_2460225	AT1G07930	AT1G07930.1,AT1G07930.2	A3	+	A	G	0.00220368	14	0.572543	0.0833109
1_2460351	AT1G07930	AT1G07930.1,AT1G07930.2	A3	+	A	G	0.0223078	139	0.245995	0.00047522
1_2460613	AT1G07930	AT1G07930.1,AT1G07930.2	A3	+	A	G	0.0566188	142	0.273644	0.0207157
1_2463255	AT1G07940	AT1G07940.1,AT1G07940.2,AT1G07940.3,AT1G07940.4	A3	-	T	C	0.0803764	410	0.311455	4.17805e-05
1_2463316	AT1G07940	AT1G07940.1,AT1G07940.2,AT1G07940.3,AT1G07940.4	A3	-	T	C	0.139897	844	0.132845	0.0497463
1_2496640	AT1G08040	AT1G08040.1,AT1G08040.3	AT1G08040	-	T	C	0.107296	25	1.16175	0.0123425
1_2540150	AT1G08125	AT1G08125.1,AT1G08125.3,AT1G08125.2,AT1G08125.4	AT1G08125	-	T	C	0.0281924	17	2.51852	0.00318662
1_2637624	AT1G08360	AT1G08360.1	RPL10AA	+	A	G	0.0142981	99	0.0966834	0.0460756
1_2637739	AT1G08360	AT1G08360.1	RPL10AA	+	A	G	0.018966	73	1.09087	1.09981e-07
1_2641242	AT1G08380	AT1G08380.1	PSAO	-	T	C	0.000806383	66	0.490049	0.0783005
1_2748575	AT1G08640	AT1G08640.1	CJD1	-	T	C	0.0252366	40	1.0403	0.0493644
1_2748602	AT1G08640	AT1G08640.1	CJD1	-	T	C	0.0243746	38	1.35	0.0179742
1_2809922	AT1G08780	AT1G08780.1	AIP3	-	T	C	0.202417	67	0.494101	0.0450274
1_2939784	AT1G09130	AT1G09130.1,AT1G09130.3	CLPR3	-	T	C	0.0163827	25	2.36481	0.0179479
1_2939823	AT1G09130	AT1G09130.1,AT1G09130.3	CLPR3	-	T	C	0.111816	229	0.210784	0.0404614
1_2940058	AT1G09130	AT1G09130.1,AT1G09130.2	CLPR3	-	T	C	0.0853361	245	0.640767	9.74622e-10
1_2942768	AT1G09140	AT1G09140.1,AT1G09140.2,AT1G09140.3	SR30	-	T	C	0.133333	24	0.742107	0.0851408
1_2942847	AT1G09140	AT1G09140.1,AT1G09140.2,AT1G09140.3	SR30	-	T	C	0.117241	34	0.599661	0.0142452
1_3017264	AT1G09340	AT1G09340.1,AT1G09340.2	CSP41B	+	A	G	0.207279	3269	0.495682	1.3524e-05
1_3018032	AT1G09340	AT1G09340.1,AT1G09340.2	CSP41B	+	A	G	0.0974312	751	0.524951	0.000714179
1_3018168	AT1G09340	AT1G09340.1,AT1G09340.2	CSP41B	+	A	G	0.0620805	37	1.06652	0.0257471
1_3107503	AT1G09590	AT1G09590.1	RPL21A	+	A	G	0.0109091	84	0.515886	0.00339144
1_3107611	AT1G09590	AT1G09590.1	RPL21A	+	A	G	0.250422	1188	0.186986	2.76442e-06
1_3114241	AT1G09620	AT1G09620.1	AT1G09620	-	T	C	0.0264484	21	1.81375	0.00965405
1_3136657	AT1G09690	AT1G09690.1	RPL21A	-	T	C	0.0083928	227	0.104079	0.0919075
1_3173773	AT1G09795	AT1G09795.1	HISN1B	+	A	G	0.0263007	46	0.960842	0.0140502
1_3275607	AT1G10030	AT1G10030.1	ERG28	+	A	G	0.0274841	13	1.22745	0.0661362
1_3377049	AT1G10290	AT1G10290.1	DRP2A	+	A	G	0.147059	80	0.468612	0.0139408
1_3383328	AT1G10310	AT1G10310.1	AT1G10310	-	T	C	0.0659686	63	0.929477	0.000104152
1_3383331	AT1G10310	AT1G10310.1	AT1G10310	-	T	C	0.146484	150	0.956911	1.27328e-05
1_3463847	AT1G10510	AT1G10510.1	emb2004	+	A	G	0.0549598	41	1.01373	0.0763791
1_3464214	AT1G10510	AT1G10510.1	emb2004	+	A	G	0.0353798	34	0.701383	0.0419287
1_3465064	AT1G10510	AT1G10510.1	emb2004	+	A	G	0.0935391	97	0.727457	0.000512601
1_3471166	AT1G10522	AT1G10522.1,AT1G10522.2	AT1G10522	+	A	G	0.0494037	174	0.299383	0.00149841
1_3513734	AT1G10630	AT1G10630.1,AT1G10630.2	ATARFA1F	-	T	C	0.055706	288	0.430398	0.000613334
1_3536151	AT1G10670	AT1G10670.1,AT1G10670.3	ACLA-1	+	A	G	0.0210588	144	0.508927	0.00953912
1_3536522	AT1G10670	AT1G10670.1,AT1G10670.3	ACLA-1	+	A	G	0.0325834	126	0.412257	0.00116779
1_3537214	AT1G10670	AT1G10670.1,AT1G10670.3	ACLA-1	+	A	G	0.00522307	24	2.58659	0.0227012
1_3537550	AT1G10670	AT1G10670.1,AT1G10670.3	ACLA-1	+	A	G	0.0079875	46	1.6898	0.000748655
1_3538064	AT1G10670	AT1G10670.1,AT1G10670.3	ACLA-1	+	A	G	0.0134409	50	1.19577	0.00173788
1_3538143	AT1G10670	AT1G10670.1,AT1G10670.3	ACLA-1	+	A	G	0.00945946	21	1.87054	0.00984236
1_3605798	AT1G10830	AT1G10830.1,AT1G10830.2,AT1G10830.3	Z-ISO	-	T	C	0.173494	72	1.05882	0.00412525
1_3663690	AT1G10950	AT1G10950.1	TMN1	+	A	G	0.104225	74	0.620117	0.0101547
1_3848967	AT1G11430	AT1G11430.1	MORF9	+	A	G	0.0610092	133	0.643744	3.74582e-05
1_3917865	AT1G11650	AT1G11650.2,AT1G11650.1	RBP45B	+	A	G	0.0470375	285	0.458363	2.82805e-08
1_3917952	AT1G11650	AT1G11650.2,AT1G11650.1	RBP45B	+	A	G	0.196224	686	0.372964	4.87034e-14
1_3956761	AT1G11720	AT1G11720.2,AT1G11720.1	SS3	+	A	G	0.103704	28	1.56732	0.00952684
1_3997281	AT1G11840	AT1G11840.6,AT1G11840.1,AT1G11840.5	ATGLX1	+	A	G	0.00120434	12	0.984925	0.0978722
1_3997294	AT1G11840	AT1G11840.6,AT1G11840.1,AT1G11840.5	ATGLX1	+	A	G	0.00128052	15	0.168984	0.0337374
1_4003163	AT1G11860	AT1G11860.3,AT1G11860.1	GDCST	+	A	G	0.00135567	25	1.41646	0.0938095
1_4003181	AT1G11860	AT1G11860.3,AT1G11860.1	GDCST	+	A	G	0.0131579	213	0.416038	0.000935727
1_4006603	AT1G11870	AT1G11870.2,AT1G11870.1,AT1G11870.5,AT1G11870.4,AT1G11870.3,AT1G11870.6	ATSRS	+	A	G	0.105769	33	1.29456	0.0190617
1_4030382	AT1G11930	AT1G11930.2,AT1G11930.1	AT1G11930	+	A	G	0.47561	117	0.237759	0.0688535
1_4050650	AT1G12000	AT1G12000.1	PFP-BETA1	-	T	C	0.0964516	299	0.338628	0.0150778
1_4051894	AT1G12000	AT1G12000.1	PFP-BETA1	-	T	C	0.0309633	54	0.777106	0.00709071
1_4051896	AT1G12000	AT1G12000.1	PFP-BETA1	-	T	C	0.0828066	131	0.525889	0.000753897
1_4150455	AT1G12230	AT1G12230.1,AT1G12230.2	AT1G12230	+	A	G	0.0288288	48	0.720738	0.0970322
1_4150896	AT1G12230	AT1G12230.1,AT1G12230.2	AT1G12230	+	A	G	0.552381	58	0.824808	0.00280744
1_4224675	AT1G12410	AT1G12410.1	CLPR2	+	A	G	0.00819062	55	0.563344	0.00920975
1_4362221	AT1G12800	AT1G12800.1	AT1G12800	-	T	C	0.109276	364	0.4338	0.000321595
1_4364008	AT1G12800	AT1G12800.1	AT1G12800	-	T	C	0.0150943	36	1.05241	0.0276039
1_4375840	AT1G12840	AT1G12840.1	VHA-C	+	A	G	0.0242826	99	0.50082	0.0264187
1_4378353	AT1G12840	AT1G12840.1	VHA-C	+	A	G	0.0273973	34	1.74261	0.000542765
1_4454573	AT1G13060	AT1G13060.1,AT1G13060.2	PBE1	+	A	G	0.00610445	27	1.34617	0.0383499
1_4454647	AT1G13060	AT1G13060.1,AT1G13060.2	PBE1	+	A	G	0.0197984	55	1.01149	0.00497513
1_4639127	AT1G13560	AT1G13560.1,AT1G13560.3,AT1G13560.2	AAPT1	-	T	C	0.272175	224	0.382301	0.000637627
1_4888784	AT1G14320	AT1G14320.1	RPL10A	+	A	G	0.049027	1038	0.326618	9.07771e-07
1_4888960	AT1G14320	AT1G14320.1,AT1G14320.2	RPL10A	+	A	G	0.00714061	136	0.238464	0.00852539
1_4889004	AT1G14320	AT1G14320.1,AT1G14320.2	RPL10A	+	A	G	0.00292097	54	0.978606	0.00496207
1_4889196	AT1G14320	AT1G14320.1,AT1G14320.2	RPL10A	+	A	G	0.313124	5960	0.433952	6.42953e-14
1_4889425	AT1G14320	AT1G14320.1,AT1G14320.2	RPL10A	+	A	G	0.00489843	68	0.554962	0.0079063
1_4889447	AT1G14320	AT1G14320.1,AT1G14320.2	RPL10A	+	A	G	0.00891423	111	0.616496	0.00607944
1_4889450	AT1G14320	AT1G14320.1,AT1G14320.2	RPL10A	+	A	G	0.0268041	325	0.494144	0.000253977
1_4889452	AT1G14320	AT1G14320.1,AT1G14320.2	RPL10A	+	A	G	0.0456329	535	0.455519	2.45085e-08
1_4927311	AT1G14400	AT1G14400.1,AT1G14400.2	UBC1	-	T	C	0.132546	202	0.67059	6.14363e-06
1_4947410	AT1G14450	AT1G14450.2,AT1G14450.1	AT1G14450	-	T	C	0.00804694	48	0.508462	0.0213105
1_5008418	AT1G14610	AT1G14610.1	VALRS	-	T	C	0.408654	85	0.400799	0.00434319
1_5040074	AT1G14670	AT1G14670.1	TMN2	+	A	G	0.0913043	105	0.618972	0.00038873
1_5102730	AT1G14810	AT1G14810.1	AT1G14810	-	T	C	0.0502666	66	0.330254	0.0483857
1_5166387	AT1G14980	AT1G14980.1,AT1G14980.2	CPN10	-	T	C	0.00815363	76	0.138055	0.0177203
1_5203757	AT1G15120	AT1G15120.2,AT1G15120.1	AT1G15120	+	A	G	0.026842	149	0.362972	3.65385e-05
1_5204011	AT1G15120	AT1G15120.2,AT1G15120.1	AT1G15120	+	A	G	0.0305907	29	1.02768	0.00193148
1_5295576	AT1G15390	AT1G15390.1	PDF1A	+	A	G	0.190319	173	0.269162	0.0346907
1_5327405	AT1G15500	AT1G15500.1	AATP2	+	A	G	0.014882	41	0.443116	0.0606792
1_5328499	AT1G15500	AT1G15500.1	AATP2	+	A	G	0.0148228	41	0.766866	0.01655
1_5328503	AT1G15500	AT1G15500.1	AATP2	+	A	G	0.0182349	50	0.641619	0.0972088
1_5400785	AT1G15690	AT1G15690.1,AT1G15690.2	AVP1	+	A	G	0.00713171	32	0.899116	0.0386479
1_5402225	AT1G15690	AT1G15690.1,AT1G15690.2	AVP1	+	A	G	0.0268959	133	0.449702	0.0136883
1_5472184	AT1G15930	AT1G15930.1,AT1G15930.2	RPS12A	+	A	G	0.0207401	278	0.0985754	0.000756051
1_5472369	AT1G15930	AT1G15930.1,AT1G15930.2	RPS12A	+	A	G	0.0111567	125	0.302029	0.00234246
1_5472697	AT1G15930	AT1G15930.1,AT1G15930.2	RPS12A	+	A	G	0.00660066	58	0.60216	0.000747086
1_5472700	AT1G15930	AT1G15930.1,AT1G15930.2	RPS12A	+	A	G	0.0156288	127	0.342596	0.0230987
1_5472721	AT1G15930	AT1G15930.1,AT1G15930.2	RPS12A	+	A	G	0.00250564	20	1.18012	0.0304165
1_5472821	AT1G15930	AT1G15930.1,AT1G15930.2	RPS12A	+	A	G	0.00819135	25	0.651144	0.0375794
1_5472847	AT1G15930	AT1G15930.1,AT1G15930.2	RPS12A	+	A	G	0.00782949	18	1.3227	0.0146233
1_5495137	AT1G16000	AT1G16000.1	AT1G16000	+	A	G	0.034955	97	0.442318	0.0261395
1_5711825	AT1G16700	AT1G16700.1	AT1G16700	+	A	G	0.123732	61	0.685309	0.0324572
1_5711826	AT1G16700	AT1G16700.1	AT1G16700	+	A	G	0.0743802	36	1.29212	0.0182718
1_5711827	AT1G16700	AT1G16700.1	AT1G16700	+	A	G	0.319672	156	0.75435	3.00128e-07
1_5756693	AT1G16810	AT1G16810.1,AT1G16810.2,AT1G16810.3	AT1G16810	+	A	G	0.0408879	35	0.720722	0.0625922
1_5775926	AT1G16880	AT1G16880.1	ACR11	+	A	G	0.0775204	569	0.411719	0.00119839
1_5776072	AT1G16880	AT1G16880.1	ACR11	+	A	G	0.0180712	101	0.343083	0.091106
1_5776442	AT1G16890	AT1G16890.2,AT1G16890.3,AT1G16890.1	UBC36	-	T	C	0.521097	247	0.264202	0.00768439
1_5890188	AT1G17220	AT1G17220.1	FUG1	+	A	G	0.015361	30	0.650031	0.054886
1_5953231	AT1G17370	AT1G17370.1,AT1G17370.2	UBP1B	-	T	C	0.00562527	13	2.38036	0.0585354
1_6004158	AT1G17470	AT1G17470.1,AT1G17470.2	DRG1	+	A	G	0.0110273	19	1.69444	0.00722474
1_6005418	AT1G17470	AT1G17470.1,AT1G17470.2	DRG1	+	A	G	0.0142977	17	1.05647	0.0693623
1_6069864	AT1G17650	AT1G17650.1,AT1G17650.2	GLYR2	-	T	C	0.10724	197	0.530236	2.07047e-06
1_6071838	AT1G17650	AT1G17650.1,AT1G17650.2	GLYR2	-	T	C	0.0108025	14	2.72979	0.00149755
1_6095893	AT1G17720	AT1G17720.2,AT1G17720.1	PP2AB2	-	T	C	0.0455581	20	0.945922	0.0607626
1_6153155	AT1G17880	AT1G17880.1	BTF3	-	T	C	0.0610411	693	0.305084	1.3668e-06
1_6213245	AT1G18060	AT1G18060.1	AT1G18060	-	T	C	0.00512918	27	2.85558	0.00108867
1_6213978	AT1G18070	AT1G18070.1,AT1G18070.3	AT1G18070	-	T	C	0.231913	234	0.298011	0.00830156
1_6214076	AT1G18070	AT1G18070.1,AT1G18070.3	AT1G18070	-	T	C	0.0133964	17	1.20884	0.034981
1_6214379	AT1G18070	AT1G18070.1,AT1G18070.3	AT1G18070	-	T	C	0.161608	213	0.368565	0.00147507
1_6223089	AT1G18080	AT1G18080.1	RACK1A	+	A	G	0.0603729	722	0.299554	1.30679e-09
1_6223121	AT1G18080	AT1G18080.1	RACK1A	+	A	G	0.0159369	202	0.26186	0.00107408
1_6223205	AT1G18080	AT1G18080.1	RACK1A	+	A	G	0.00920275	95	0.52727	0.00224841
1_6223875	AT1G18080	AT1G18080.1	RACK1A	+	A	G	0.0163776	119	0.283851	0.0784603
1_6350148	AT1G18450	AT1G18450.1	ARP4	+	A	G	0.156798	143	0.316406	0.00930812
1_6377449	AT1G18540	AT1G18540.1	RPL6A	-	T	C	0.131488	494	0.262289	0.000286681
1_6800177	AT1G19660	AT1G19660.1,AT1G19660.3	BBD2	-	T	C	0.01983	14	0.398171	0.0971156
1_6913508	AT1G19910	AT1G19910.1,AT1G19910.2	VHA-C2	+	A	G	0.0103734	55	0.149643	0.084618
1_6949212	AT1G20050	AT1G20050.1	HYD1	+	A	G	0.0785947	217	0.0239514	0.0331892
1_7001760	AT1G20200	AT1G20200.1	RPN3A	-	T	C	0.0183706	23	2.19124	0.000627175
1_7042698	AT1G20340	AT1G20340.1	DRT112	-	T	C	0.0116456	299	0.310534	9.5513e-05
1_7042753	AT1G20340	AT1G20340.1	DRT112	-	T	C	0.00238095	70	0.592163	0.0699544
1_7042754	AT1G20340	AT1G20340.1	DRT112	-	T	C	0.00338026	103	0.461138	0.0362685
1_7043067	AT1G20340	AT1G20340.1	DRT112	-	T	C	0.00241981	176	0.740073	1.44735e-05
1_7130425	AT1G20580	AT1G20580.1	SMD3B	+	A	G	0.036612	67	0.881562	0.00360221
1_7130517	AT1G20580	AT1G20580.1	SMD3B	+	A	G	0.021374	14	2.65806	0.00864774
1_7298241	AT1G20950	AT1G20950.1	PFP-ALPHA1	-	T	C	0.0246445	26	0.890373	0.0985861
1_7572185	AT1G21600	AT1G21600.1,AT1G21600.2	PTAC6	-	T	C	0.00965251	15	2.06238	0.0306924
1_7618295	AT1G21690	AT1G21690.1,AT1G21690.2,AT1G21690.4	RFC4	+	A	G	0.1	49	0.697216	0.0514402
1_7618353	AT1G21690	AT1G21690.1,AT1G21690.3,AT1G21690.2,AT1G21690.4	RFC4	+	A	G	0.120283	51	1.37867	8.3694e-05
1_7878975	AT1G22300	AT1G22300.1,AT1G22300.2,AT1G22300.3	GRF10	-	T	C	0.14799	243	0.663095	2.45764e-05
1_7878999	AT1G22300	AT1G22300.1,AT1G22300.2,AT1G22300.3	GRF10	-	T	C	0.0123014	24	1.14834	0.0977966
1_7879147	AT1G22300	AT1G22300.1,AT1G22300.2,AT1G22300.3	GRF10	-	T	C	0.00363997	11	1.21606	0.0622619
1_7881075	AT1G22300	AT1G22300.1,AT1G22300.2,AT1G22300.3	GRF10	-	T	C	0.0055336	35	0.778287	0.0386956
1_7912269	AT1G22410	AT1G22410.1	AT1G22410	+	A	G	0.0166528	40	1.43148	0.000151625
1_7912924	AT1G22410	AT1G22410.1	AT1G22410	+	A	G	0.0745527	225	0.418748	3.83716e-05
1_7953853	AT1G22520	AT1G22520.1,AT1G22520.2	AT1G22520	-	T	C	0.0235519	37	0.49709	0.0671005
1_8052249	AT1G22750	AT1G22750.4,AT1G22750.2,AT1G22750.3,AT1G22750.1	AT1G22750	+	A	G	0.0168651	17	2.77231	0.0173422
1_8069097	AT1G22780	AT1G22780.1	RPS18A	+	A	G	0.0256657	160	0.44174	0.000794591
1_8224321	AT1G23190	AT1G23190.1	PGM3	+	A	G	0.0429594	18	1.66605	0.0727346
1_8242728	AT1G23220	AT1G23220.1	AT1G23220	+	A	G	0.366379	340	0.519181	1.19976e-10
1_8263206	AT1G23290	AT1G23290.1	RPL27AB	+	A	G	0.0333411	576	0.262191	5.5874e-06
1_8263219	AT1G23290	AT1G23290.1	RPL27AB	+	A	G	0.00203574	36	0.881002	0.0176448
1_8263417	AT1G23290	AT1G23290.1	RPL27AB	+	A	G	0.0335838	219	0.307756	4.4935e-05
1_8268933	AT1G23310	AT1G23310.1,AT1G23310.2	GGAT1	-	T	C	0.0135686	173	0.595102	0.0139408
1_8268991	AT1G23310	AT1G23310.1,AT1G23310.2	GGAT1	-	T	C	0.00348592	53	0.913332	0.00927395
1_8269550	AT1G23310	AT1G23310.1,AT1G23310.2	GGAT1	-	T	C	0.00138545	19	2.19692	0.00539812
1_8270256	AT1G23310	AT1G23310.1,AT1G23310.2	GGAT1	-	T	C	0.0022176	32	2.12233	0.00232225
1_8270282	AT1G23310	AT1G23310.1,AT1G23310.2	GGAT1	-	T	C	0.0214231	308	0.784098	0.000313292
1_8270742	AT1G23310	AT1G23310.1,AT1G23310.2	GGAT1	-	T	C	0.0102735	151	0.853842	0.0051617
1_8270796	AT1G23310	AT1G23310.1,AT1G23310.2	GGAT1	-	T	C	0.00107269	17	2.41777	0.0179742
1_8271358	AT1G23310	AT1G23310.1,AT1G23310.2	GGAT1	-	T	C	0.00157384	18	2.03041	0.0317024
1_8643114	AT1G24360	AT1G24360.1	AT1G24360	+	A	G	0.00646284	26	0.395167	0.0682547
1_8643116	AT1G24360	AT1G24360.1	AT1G24360	+	A	G	0.00701199	31	2.06168	0.000512906
1_8643142	AT1G24360	AT1G24360.1	AT1G24360	+	A	G	0.0109526	43	0.715005	0.0783257
1_8685869	AT1G24510	AT1G24510.1,AT1G24510.3,AT1G24510.2	CCT5	-	T	C	0.0294906	165	0.566156	6.17202e-06
1_8889326	AT1G25350	AT1G25350.1,AT1G25350.2	OVA9	-	T	C	0.0260708	14	3.02641	0.0770825
1_9206041	AT1G26630	AT1G26630.1,AT1G26630.2	ELF5A-2	+	A	G	0.00157991	37	1.03893	0.0798804
1_9206483	AT1G26630	AT1G26630.1,AT1G26630.2	ELF5A-2	+	A	G	0.0633646	1539	0.436161	1.99474e-17
1_9206548	AT1G26630	AT1G26630.1,AT1G26630.2	ELF5A-2	+	A	G	0.00849754	185	0.459235	0.000832062
1_9206697	AT1G26630	AT1G26630.1,AT1G26630.2	ELF5A-2	+	A	G	0.025997	515	0.533037	2.89185e-09
1_9206860	AT1G26630	AT1G26630.1,AT1G26630.2	ELF5A-2	+	A	G	0.00236196	45	0.765375	0.051684
1_9207019	AT1G26630	AT1G26630.1,AT1G26630.2	ELF5A-2	+	A	G	0.00616212	110	0.177056	0.0601893
1_9207094	AT1G26630	AT1G26630.1,AT1G26630.2	ELF5A-2	+	A	G	0.0065454	95	0.511149	0.0084742
1_9315592	AT1G26880	AT1G26880.1,AT1G26880.2	RPL34A	-	T	C	0.232186	870	0.326474	1.25339e-08
1_9315599	AT1G26880	AT1G26880.1,AT1G26880.2	RPL34A	-	T	C	0.303204	1164	0.274204	1.11259e-07
1_9376229	AT1G27000	AT1G27000.1	AT1G27000	+	A	G	0.113154	80	0.532815	0.0155029
1_9485603	AT1G27310	AT1G27310.1	NTF2A	-	T	C	0.0370693	170	0.120925	0.0779396
1_9527845	AT1G27435	AT1G27435.1	AT1G27435	-	T	C	0.048048	48	0.626279	0.006664
1_9527879	AT1G27435	AT1G27435.1	AT1G27435	-	T	C	0.0126084	16	1.35218	0.0251078
1_9527883	AT1G27435	AT1G27435.1	AT1G27435	-	T	C	0.0222399	28	1.68468	0.00744742
1_9527888	AT1G27435	AT1G27435.1	AT1G27435	-	T	C	0.2125	272	0.415881	2.93111e-07
1_9533929	AT1G27450	AT1G27450.2,AT1G27450.1,AT1G27450.3	APT1	+	A	G	0.0712251	125	0.720974	5.6276e-05
1_9533930	AT1G27450	AT1G27450.2,AT1G27450.1,AT1G27450.3	APT1	+	A	G	0.0247204	42	0.568268	0.0234617
1_9533931	AT1G27450	AT1G27450.2,AT1G27450.1,AT1G27450.3	APT1	+	A	G	0.0230633	39	1.2529	0.000583337
1_10151066	AT1G29070	AT1G29070.1	RPL34	+	A	G	0.00256283	31	1.11748	0.0601679
1_10151100	AT1G29070	AT1G29070.1	RPL34	+	A	G	0.00277671	29	0.558293	0.0483071
1_10151135	AT1G29070	AT1G29070.1	RPL34	+	A	G	0.00674286	59	0.407193	0.0338215
1_10181896	AT1G29150	AT1G29150.1,AT1G29150.2	RPN6	+	A	G	0.0394011	50	0.942989	0.00609485
1_10385165	AT1G29700	AT1G29700.1,AT1G29700.2	AT1G29700	-	T	C	0.241379	63	1.61996	1.39966e-05
1_10459659	AT1G29880	AT1G29880.1	GLYRS-1	-	T	C	0.220588	150	0.425962	9.96045e-05
1_10472678	AT1G29900	AT1G29900.1	CARB	+	A	G	0.000389024	20	-1.09842	0.0560426
1_10472837	AT1G29910	AT1G29910.1	LHCB1.2	-	T	C	0.000738457	86	0.696026	0.00940565
1_10473191	AT1G29910	AT1G29910.1	LHCB1.2	-	T	C	0.00040399	26	2.58742	0.0430719
1_10478677	AT1G29930	AT1G29930.1	LHCB1.3	+	A	G	0.000912448	127	0.572428	0.0142066
1_10478944	AT1G29930	AT1G29930.1	LHCB1.3	+	A	G	0.00213295	42	1.25368	0.0523849
1_10478952	AT1G29930	AT1G29930.1	LHCB1.3	+	A	G	0.00229443	37	1.4043	0.0188362
1_10478981	AT1G29930	AT1G29930.1	LHCB1.3	+	A	G	0.0135243	152	0.894836	4.4168e-08
1_10722696	AT1G30380	AT1G30380.1	PSAK	+	A	G	0.00111489	61	0.945733	0.0743822
1_10722699	AT1G30380	AT1G30380.1	PSAK	+	A	G	0.00484916	262	0.870112	1.02619e-09
1_10722884	AT1G30380	AT1G30380.1	PSAK	+	A	G	0.000544849	27	1.7274	0.00880973
1_10769113	AT1G30450	AT1G30450.1,AT1G30450.4	CCC1	+	A	G	0.381579	87	0.468059	0.00382292
1_10831808	AT1G30580	AT1G30580.1	AT1G30580	-	T	C	0.0772579	71	1.11931	0.0015184
1_10831883	AT1G30580	AT1G30580.1	AT1G30580	-	T	C	0.100187	214	0.563874	7.00401e-08
1_10832291	AT1G30580	AT1G30580.1	AT1G30580	-	T	C	0.00395726	20	1.47574	0.0722789
1_10858542	AT1G30630	AT1G30630.1	AT1G30630	-	T	C	0.110294	150	0.323868	0.00661332
1_10882240	AT1G30680	AT1G30680.1	T5I8.13	+	A	G	0.0864865	32	0.321591	0.0970607
1_11142844	AT1G31180	AT1G31180.1,AT1G31180.2	IMDH1	-	T	C	0.0622754	52	0.849885	0.00841351
1_11397606	AT1G31800	AT1G31800.1	CYP97A3	+	A	G	0.0189394	20	1.78074	0.00406673
1_11410985	AT1G31812	AT1G31812.1	ACBP6	-	T	C	0.0708583	71	0.426621	0.00926627
1_11411168	AT1G31812	AT1G31812.1	ACBP6	-	T	C	0.00266768	28	0.736267	0.0443499
1_11537533	AT1G32080	AT1G32080.1	PLGG1	-	T	C	0.0340857	74	1.41822	1.02254e-05
1_11689246	AT1G32400	AT1G32400.1,AT1G32400.2,AT1G32400.3	TOM2A	-	T	C	0.0498339	30	0.445494	0.0779692
1_11750104	AT1G32500	AT1G32500.1	ABCI7	-	T	C	0.0264977	23	1.77121	0.0225529
1_11771841	AT1G32550	AT1G32550.1	FdC1	-	T	C	0.0541516	15	1.18585	0.0624408
1_12011575	AT1G33120	AT1G33120.1	RPL9B	+	A	G	0.0165525	186	0.416029	0.000367494
1_12011610	AT1G33120	AT1G33120.1	RPL9B	+	A	G	0.00818394	105	0.163503	0.00884107
1_12011625	AT1G33120	AT1G33120.1	RPL9B	+	A	G	0.00523286	60	0.522926	0.0156219
1_12012153	AT1G33120	AT1G33120.1	RPL9B	+	A	G	0.00519272	71	0.101328	0.0907467
1_12012156	AT1G33120	AT1G33120.1	RPL9B	+	A	G	0.00327918	44	0.484078	0.0946925
1_12012213	AT1G33120	AT1G33120.1	RPL9B	+	A	G	0.00281889	28	0.877601	0.007952
1_12023911	AT1G33140	AT1G33140.1	RPL9B	+	A	G	0.00874498	74	0.573471	0.00501146
1_12023998	AT1G33140	AT1G33140.1	RPL9B	+	A	G	0.0124253	185	0.330471	0.022619
1_12024432	AT1G33140	AT1G33140.1	RPL9B	+	A	G	0.0045354	82	0.814559	3.74582e-05
1_12024479	AT1G33140	AT1G33140.1	RPL9B	+	A	G	0.0237454	344	0.235201	8.14433e-07
1_12024490	AT1G33140	AT1G33140.1	RPL9B	+	A	G	0.0409413	595	0.122968	0.0469441
1_12024492	AT1G33140	AT1G33140.1	RPL9B	+	A	G	0.0332352	474	0.163397	0.00210283
1_12024496	AT1G33140	AT1G33140.1	RPL9B	+	A	G	0.0324164	416	0.228995	3.58905e-05
1_12266708	AT1G33810	AT1G33810.1	AT1G33810	+	A	G	0.0874587	53	0.315832	0.0533786
1_12358064	AT1G34000	AT1G34000.1	OHP2	-	T	C	0.0223964	20	2.42291	0.0904543
1_12370146	AT1G34030	AT1G34030.1	RPS18A	-	T	C	0.0527441	74	0.745326	8.61171e-05
1_12370245	AT1G34030	AT1G34030.1	RPS18A	-	T	C	0.045977	108	0.981306	1.38577e-05
1_12370266	AT1G34030	AT1G34030.1	RPS18A	-	T	C	0.0130519	47	1.28787	0.00151354
1_12370668	AT1G34030	AT1G34030.1	RPS18A	-	T	C	0.00825835	67	0.615721	0.0133105
1_12371099	AT1G34030	AT1G34030.1	RPS18A	-	T	C	0.0183351	137	0.312974	0.0145056
1_13122571	AT1G35580	AT1G35580.1,AT1G35580.2	CINV1	-	T	C	0.219081	310	0.58982	6.65788e-09
1_13209055	AT1G35680	AT1G35680.1	RPL21	+	A	G	0.00191686	32	1.1333	0.0068813
1_13209422	AT1G35680	AT1G35680.1	RPL21	+	A	G	0.00735383	121	1.26307	3.96773e-07
1_13209750	AT1G35680	AT1G35680.1	RPL21	+	A	G	0.00133416	15	2.85809	0.0172084
1_13209762	AT1G35680	AT1G35680.1	RPL21	+	A	G	0.0341044	516	0.787609	1.48014e-18
1_13209938	AT1G35680	AT1G35680.1	RPL21	+	A	G	0.00127551	18	0.938548	0.0665058
1_15651618	AT1G41880	AT1G41880.1,AT1G41880.2	RPL35AB	-	T	C	0.0425225	236	0.30452	0.00297217
1_15651764	AT1G41880	AT1G41880.1,AT1G41880.2	RPL35AB	-	T	C	0.131642	986	0.220918	2.35382e-11
1_16128711	AT1G42970	AT1G42970.1	GAPB	+	A	G	0.000713012	24	1.49628	0.078666
1_16129045	AT1G42970	AT1G42970.1	GAPB	+	A	G	0.0266134	659	0.429054	1.58271e-06
1_16129572	AT1G42970	AT1G42970.1	GAPB	+	A	G	0.00122699	18	1.77174	0.0926587
1_16268267	AT1G43170	AT1G43170.1,AT1G43170.4	ARP1	+	A	G	0.0295719	478	0.169834	0.0162464
1_16268481	AT1G43170	AT1G43170.1,AT1G43170.4	ARP1	+	A	G	0.0011528	22	1.10081	0.0400551
1_16470340	AT1G43670	AT1G43670.1	AT1G43670	+	A	G	0.0323956	38	1.19389	0.0185025
1_16482557	AT1G43690	AT1G43690.1	AT1G43690	+	A	G	0.0238095	13	1.34079	0.085971
1_16872473	AT1G44575	AT1G44575.1,AT1G44575.2	PSBS	+	A	G	0.00268246	82	0.95116	0.0189394
1_16872968	AT1G44575	AT1G44575.1,AT1G44575.2	PSBS	+	A	G	0.0596687	2093	0.341732	0.0161991
1_16873156	AT1G44575	AT1G44575.1,AT1G44575.2	PSBS	+	A	G	0.0455037	716	0.410231	0.0684219
1_16873252	AT1G44575	AT1G44575.1,AT1G44575.2	PSBS	+	A	G	0.012653	61	0.678323	0.00201277
1_16873254	AT1G44575	AT1G44575.1,AT1G44575.2	PSBS	+	A	G	0.0683191	328	0.499644	0.0259559
1_16912471	AT1G44790	AT1G44790.1	AT1G44790	-	T	C	0.074141	41	0.60246	0.0932589
1_16942368	AT1G44835	AT1G44835.1,AT1G44835.2	AT1G44835	+	A	G	0.455556	164	0.697397	1.83567e-07
1_17321277	AT1G47260	AT1G47260.1	GAMMACA2	-	T	C	0.0678776	71	0.619642	0.018317
1_17321550	AT1G47260	AT1G47260.1	GAMMACA2	-	T	C	0.00873265	39	0.749935	0.0332648
1_17395599	AT1G47420	AT1G47420.1	SDH5	-	T	C	0.0532995	21	1.59489	0.00195047
1_17395624	AT1G47420	AT1G47420.1	SDH5	-	T	C	0.0404798	27	0.648424	0.00587756
1_17427256	AT1G47490	AT1G47490.1,AT1G47490.2	RBP47C	+	A	G	0.0428135	28	0.573547	0.0455242
1_17454146	AT1G47530	AT1G47530.1,AT1G47530.2	AT1G47530	+	A	G	0.285111	270	0.187563	0.0245986
1_17463066	AT1G47550	AT1G47550.1,AT1G47550.2	SEC3A	+	A	G	0.245179	89	0.681483	0.000967873
1_17568425	AT1G47740	AT1G47740.1,AT1G47740.2,AT1G47740.3	AT1G47740	+	A	G	0.0803738	86	0.579494	0.0824404
1_17569025	AT1G47740	AT1G47740.1,AT1G47740.2,AT1G47740.3	AT1G47740	+	A	G	0.0520231	36	0.880116	0.048619
1_17717284	AT1G48030	AT1G48030.1,AT1G48030.2,AT1G48030.3,AT1G48030.4,AT1G48030.5	LPD1	-	T	C	0.184834	390	0.401766	0.00594138
1_17717311	AT1G48030	AT1G48030.1,AT1G48030.2,AT1G48030.3,AT1G48030.4,AT1G48030.5	LPD1	-	T	C	0.0584155	160	0.439185	0.0107255
1_17868168	AT1G48350	AT1G48350.1	RPL18	+	A	G	0.0108169	87	0.283119	0.0118517
1_17886383	AT1G48410	AT1G48410.2,AT1G48410.1	AGO1	-	T	C	0.0534224	64	0.769985	0.00920975
1_17886630	AT1G48410	AT1G48410.2,AT1G48410.1	AGO1	-	T	C	0.0615293	103	1.27757	2.35382e-11
1_17886963	AT1G48410	AT1G48410.2,AT1G48410.1	AGO1	-	T	C	0.0364277	62	1.69485	0.000528531
1_17887884	AT1G48410	AT1G48410.2,AT1G48410.1	AGO1	-	T	C	0.039641	53	1.52025	0.0015833
1_17908744	AT1G48450	AT1G48450.1,AT1G48450.2	AT1G48450	-	T	C	0.0351662	55	0.609295	0.0648382
1_18059906	AT1G48830	AT1G48830.1,AT1G48830.2	RPS7A	-	T	C	0.00483773	24	1.44975	0.011111
1_18065268	AT1G48850	AT1G48850.1,AT1G48850.3,AT1G48850.2	EMB1144	-	T	C	0.0825147	168	0.456853	0.000227306
1_18071038	AT1G48860	AT1G48860.1,AT1G48860.2	AT1G48860	-	T	C	0.116379	135	0.490374	0.000736001
1_18139777	AT1G49040	AT1G49040.1,AT1G49040.4	SCD1	-	T	C	0.213457	92	0.573474	0.0480607
1_18177717	AT1G49140	AT1G49140.1,AT1G49140.2	AT1G49140	-	T	C	0.0743243	231	0.22861	0.0002767
1_18218095	AT1G49240	AT1G49240.1	ACT8	+	A	G	0.365414	486	0.13381	0.00240588
1_18236714	AT1G49300	AT1G49300.1,AT1G49300.2	RABG3E	+	A	G	0.0348331	48	0.518094	0.0167104
1_18328428	AT1G49510	AT1G49510.1,AT1G49510.2	emb1273	+	A	G	0.0928433	48	0.639966	0.0472148
1_18359116	AT1G49600	AT1G49600.1,AT1G49600.2	RBP47A	-	T	C	0.010929	12	0.858612	0.0436614
1_18368386	AT1G49630	AT1G49630.1,AT1G49630.4,AT1G49630.5	PREP2	-	T	C	0.109804	28	1.31401	0.00451248
1_18388793	AT1G49700	AT1G49700.2,AT1G49700.1	AT1G49700	-	T	C	0.0296192	21	2.43119	0.0405322
1_18518317	AT1G50010	AT1G50010.1	TUBA4	+	A	G	0.00158545	19	2.17557	0.0181931
1_18518500	AT1G50010	AT1G50010.1	TUBA4	+	A	G	0.00708323	56	0.972709	0.0902181
1_18519332	AT1G50010	AT1G50010.1	TUBA4	+	A	G	0.0169935	104	0.959791	9.53039e-05
1_18519665	AT1G50010	AT1G50010.1	TUBA4	+	A	G	0.00336744	26	1.50953	0.0212199
1_18638680	AT1G50320	AT1G50320.1	ATHX	-	T	C	0.00758265	25	1.55606	0.0554318
1_18661004	AT1G50370	AT1G50370.1	FYPP1	+	A	G	0.0318755	43	0.675582	0.006645
1_18666004	AT1G50380	AT1G50380.2,AT1G50380.1	AT1G50380	+	A	G	0.0906863	37	0.931235	0.0140438
1_18871875	AT1G50920	AT1G50920.1	AT1G50920	+	A	G	0.129142	152	0.621388	3.24997e-05
1_18929403	AT1G51070	AT1G51070.1,AT1G51070.2	BHLH115	+	A	G	0.0525813	55	0.494524	0.0620448
1_18986154	AT1G51200	AT1G51200.1,AT1G51200.2,AT1G51200.3,AT1G51200.4	SAP2	+	A	G	0.218304	842	0.0709462	0.0291535
1_18986156	AT1G51200	AT1G51200.1,AT1G51200.2,AT1G51200.3,AT1G51200.4	SAP2	+	A	G	0.00309917	12	1.81499	0.0444027
1_19103028	AT1G51510	AT1G51510.1	Y14	-	T	C	0.109897	171	0.41381	0.0529605
1_19104077	AT1G51510	AT1G51510.1	Y14	-	T	C	0.308793	755	0.247715	3.76372e-11
1_19104562	AT1G51510	AT1G51510.1	Y14	-	T	C	0.0351379	135	0.350645	0.0423952
1_19128468	AT1G51590	AT1G51590.1,AT1G51590.2	MNS1	-	T	C	0.31457	190	0.109716	0.0319237
1_19134816	AT1G51600	AT1G51600.1,AT1G51600.2	GATA28	+	A	G	0.0510949	21	1.63187	0.0819072
1_19152668	AT1G51650	AT1G51650.1	AT1G51650	+	A	G	0.0149322	65	0.625108	0.016506
1_19152813	AT1G51650	AT1G51650.1	AT1G51650	+	A	G	0.00166415	22	1.73699	0.0204548
1_19153678	AT1G51650	AT1G51650.1	AT1G51650	+	A	G	0.0128827	85	0.412273	0.0348941
1_19153690	AT1G51650	AT1G51650.1	AT1G51650	+	A	G	0.003386	21	1.22269	0.0683352
1_19153693	AT1G51650	AT1G51650.1	AT1G51650	+	A	G	0.0701962	415	0.462043	3.89349e-05
1_19153780	AT1G51650	AT1G51650.1	AT1G51650	+	A	G	0.0327061	73	0.712897	0.000926185
1_19325394	AT1G51980	AT1G51980.1,AT1G51980.2	AT1G51980	-	T	C	0.0454545	95	0.563523	0.00278973
1_19453720	AT1G52220	AT1G52220.1,AT1G52220.3,AT1G52220.4,AT1G52220.2	CURT1C	-	T	C	0.0404762	85	0.598144	0.000862171
1_19475201	AT1G52300	AT1G52300.1	RPL37B	-	T	C	0.0145503	187	0.495642	0.00538372
1_19475235	AT1G52300	AT1G52300.1	RPL37B	-	T	C	0.0345568	467	0.559343	3.50846e-12
1_19475236	AT1G52300	AT1G52300.1	RPL37B	-	T	C	0.0033989	47	0.803107	0.0263437
1_19646347	AT1G52740	AT1G52740.1	HTA9	+	A	G	0.0157068	18	1.67571	0.0122699
1_19646371	AT1G52740	AT1G52740.1	HTA9	+	A	G	0.0210526	16	2.0563	0.030734
1_19884719	AT1G53310	AT1G53310.1,AT1G53310.2,AT1G53310.3	PPC1	-	T	C	0.0318471	25	1.09782	0.0345695
1_20037522	AT1G53670	AT1G53670.1,AT1G53670.2	MSRB1	+	A	G	0.0182328	39	1.24746	0.0205585
1_20104520	AT1G53850	AT1G53850.1,AT1G53850.2	PAE1	-	T	C	0.0278494	54	1.42297	8.67916e-05
1_20104553	AT1G53850	AT1G53850.1,AT1G53850.2	PAE1	-	T	C	0.0604059	128	0.543196	0.00323513
1_20136779	AT1G53910	AT1G53910.1,AT1G53910.3	RAP2-12	+	A	G	0.102804	66	0.607859	0.017608
1_20184876	AT1G54080	AT1G54080.1,AT1G54080.2	UBP1A	-	T	C	0.0404823	47	0.556115	0.0141329
1_20390864	AT1G54580	AT1G54580.1	ACP2	+	A	G	0.0145302	45	0.858071	0.0110771
1_20390865	AT1G54580	AT1G54580.1	ACP2	+	A	G	0.0489182	156	0.643323	1.23902e-05
1_20401652	AT1G54630	AT1G54630.1,AT1G54630.2	ACP3	-	T	C	0.022838	75	0.685553	0.00116987
1_20513407	AT1G54990	AT1G54990.1	AXR4	+	A	G	0.0303767	25	0.988052	0.051546
1_20803171	AT1G55670	AT1G55670.1	PSAG	-	T	C	0.00179372	100	0.598249	0.046612
1_20945985	AT1G56000	AT1G56000.1,AT1G56000.2	AT1G56000	+	A	G	0.226087	78	0.638121	0.000151897
1_20966143	AT1G56050	AT1G56050.1	AT1G56050	+	A	G	0.08646	53	0.884703	0.000205111
1_20968421	AT1G56070	AT1G56070.1,AT1G56070.2,AT1G56070.3	LOS1	-	T	C	0.00231942	28	1.41176	0.0825087
1_20968543	AT1G56070	AT1G56070.1,AT1G56070.2,AT1G56070.3	LOS1	-	T	C	0.00854261	83	0.518633	0.00339144
1_21073182	AT1G56280	AT1G56280.1,AT1G56280.2	ATDI19	-	T	C	0.245242	1572	0.10769	0.00248754
1_21073194	AT1G56280	AT1G56280.1,AT1G56280.2	ATDI19	-	T	C	0.0826347	552	0.306332	3.01773e-05
1_21073475	AT1G56280	AT1G56280.1,AT1G56280.2	ATDI19	-	T	C	0.0654806	530	0.199488	0.00344848
1_21073670	AT1G56280	AT1G56280.1,AT1G56280.2	ATDI19	-	T	C	0.00963649	101	0.858469	0.000508265
1_21073722	AT1G56280	AT1G56280.1,AT1G56280.2	ATDI19	-	T	C	0.00309568	33	1.16734	0.00460825
1_21073904	AT1G56280	AT1G56280.1,AT1G56280.2	ATDI19	-	T	C	0.00563838	59	0.558666	0.0811042
1_21086869	AT1G56330	AT1G56330.1	SAR1B	-	T	C	0.0693489	262	0.354285	0.000946446
1_21086978	AT1G56330	AT1G56330.1	SAR1B	-	T	C	0.00746269	34	1.29815	0.0340291
1_21144198	AT1G56450	AT1G56450.1	PBG1	+	A	G	0.0938124	188	0.66752	1.71902e-07
1_21356131	AT1G57660	AT1G57660.1	RPL21F	+	A	G	0.0324819	543	0.241544	0.00591661
1_21396482	AT1G57770	AT1G57770.1	AT1G57770	+	A	G	0.358053	309	0.544299	0.000151127
1_21397011	AT1G57770	AT1G57770.1	AT1G57770	+	A	G	0.0618436	53	0.904881	0.0121488
1_21430068	AT1G57860	AT1G57860.1	RPL21F	-	T	C	0.0511253	184	0.468739	9.07349e-05
1_21889899	AT1G59600	AT1G59600.1	ZCW7	-	T	C	0.291005	55	0.497125	0.00254682
1_22053663	AT1G59900	AT1G59900.1	E1 ALPHA	+	A	G	0.0381356	63	0.818219	0.00717764
1_22053667	AT1G59900	AT1G59900.1	E1 ALPHA	+	A	G	0.0408163	72	1.09975	0.00359609
1_22053703	AT1G59900	AT1G59900.1	E1 ALPHA	+	A	G	0.180683	217	0.633199	5.23412e-06
1_22093948	AT1G60000	AT1G60000.1	AT1G60000	-	T	C	0.00580098	26	1.28732	0.00955364
1_22212281	AT1G60230	AT1G60230.1	AT1G60230	-	T	C	0.192308	60	0.689159	0.0115513
1_22213401	AT1G60230	AT1G60230.1	AT1G60230	-	T	C	0.109467	37	1.88935	5.74503e-05
1_22325695	AT1G60600	AT1G60600.2,AT1G60600.1	ABC4	-	T	C	0.1925	154	0.491784	0.015081
1_22445091	AT1G60950	AT1G60950.1	FD2	+	A	G	0.0651131	475	0.367102	2.2343e-05
1_22700607	AT1G61520	AT1G61520.1,AT1G61520.2	LHCA3	+	A	G	0.00194291	107	0.69214	7.21115e-05
1_22700615	AT1G61520	AT1G61520.1,AT1G61520.2	LHCA3	+	A	G	0.00353271	190	0.672635	2.98119e-05
1_22700851	AT1G61520	AT1G61520.1,AT1G61520.2	LHCA3	+	A	G	0.000271518	15	1.86232	0.0324203
1_22700891	AT1G61520	AT1G61520.1,AT1G61520.2	LHCA3	+	A	G	0.0125361	695	0.602303	8.11928e-16
1_23234853	AT1G62750	AT1G62750.1	CPEFG	-	T	C	0.00617602	24	1.98361	0.00865924
1_23605840	AT1G63660	AT1G63660.1,AT1G63660.2	AT1G63660	-	T	C	0.0247855	26	2.80622	8.99841e-06
1_23657768	AT1G63770	AT1G63770.3,AT1G63770.2,AT1G63770.4,AT1G63770.1	AT1G63770	-	T	C	0.0150843	17	3.9502	0.00558888
1_23658058	AT1G63770	AT1G63770.5,AT1G63770.3,AT1G63770.2,AT1G63770.7,AT1G63770.4,AT1G63770.1	AT1G63770	-	T	C	0.24022	436	0.44545	2.71927e-07
1_23669665	AT1G63810	AT1G63810.1,AT1G63810.2	AT1G63810	-	T	C	0.523256	45	0.492086	0.0139341
1_23669908	AT1G63810	AT1G63810.1,AT1G63810.2	AT1G63810	-	T	C	0.116105	31	1.49886	9.36561e-05
1_23733632	AT1G63940	AT1G63940.2,AT1G63940.4,AT1G63940.3,AT1G63940.1	MDAR6	+	A	G	0.147129	123	0.432548	0.0492956
1_23743108	AT1G63980	AT1G63980.1,AT1G63980.2	AT1G63980	+	A	G	0.180412	35	0.190861	0.0456327
1_23790817	AT1G64090	AT1G64090.1,AT1G64090.2	RTNLB3	+	A	G	0.177778	48	0.541387	0.0538912
1_23810079	AT1G64150	AT1G64150.1	AT1G64150	-	T	C	0.105866	74	0.799064	0.0111978
1_23835258	AT1G64230	AT1G64230.1,AT1G64230.4,AT1G64230.3	UBC28	+	A	G	0.204629	253	-0.62353	0.00591239
1_23955139	AT1G64510	AT1G64510.2,AT1G64510.1	RPS6	-	T	C	0.0043822	51	0.387951	0.0541748
1_23957560	AT1G64520	AT1G64520.1	RPN12A	+	A	G	0.00806452	13	1.62355	0.095275
1_23958002	AT1G64520	AT1G64520.1	RPN12A	+	A	G	0.0157445	35	0.956241	0.00780176
1_24236897	AT1G65260	AT1G65260.1,AT1G65260.2	VIPP1	+	A	G	0.0297502	106	0.71604	0.0351809
1_24240351	AT1G65260	AT1G65260.1,AT1G65260.2	VIPP1	+	A	G	0.162257	552	0.861374	4.75641e-20
1_24240377	AT1G65260	AT1G65260.1,AT1G65260.2	VIPP1	+	A	G	0.0104648	34	0.724935	0.0187112
1_24246293	AT1G65280	AT1G65280.1,AT1G65280.2	AT1G65280	+	A	G	0.12	15	1.19961	0.0998572
1_24249079	AT1G65290	AT1G65290.1	MTACP2	-	T	C	0.174261	719	0.0439605	0.000163459
1_24295976	AT1G65410	AT1G65410.1	TGD3	+	A	G	0.0557229	37	0.962552	0.0220127
1_24440466	AT1G65720	AT1G65720.1	AT1G65720	-	T	C	0.0680272	60	0.505985	0.0664522
1_24541861	AT1G65930	AT1G65930.1	CICDH	+	A	G	0.0691395	233	0.317721	0.0410281
1_24686345	AT1G66240	AT1G66240.1,AT1G66240.2,AT1G66240.3	ATX1	-	T	C	0.0777432	175	0.488305	0.000752233
1_24779981	AT1G66430	AT1G66430.1	AT1G66430	+	A	G	0.00529902	14	1.08497	0.0696841
1_25045432	AT1G67080	AT1G67080.1,AT1G67080.2	ABA4	-	T	C	0.0220126	14	2.0472	0.0449625
1_25048503	AT1G67090	AT1G67090.1,AT1G67090.2	RBCS-1A	-	T	C	0.00018944	18	2.04676	0.0455013
1_25048511	AT1G67090	AT1G67090.1,AT1G67090.2	RBCS-1A	-	T	C	0.00246411	242	0.73247	3.68488e-05
1_25048568	AT1G67090	AT1G67090.1,AT1G67090.2	RBCS-1A	-	T	C	0.00729288	800	0.373548	0.0989179
1_25048696	AT1G67090	AT1G67090.1,AT1G67090.2	RBCS-1A	-	T	C	0.00104437	155	0.53373	0.0661551
1_25048905	AT1G67090	AT1G67090.1,AT1G67090.2	RBCS-1A	-	T	C	0.000202325	29	1.59541	0.0732208
1_25048929	AT1G67090	AT1G67090.1,AT1G67090.2	RBCS-1A	-	T	C	0.00578238	821	0.709119	4.83927e-09
1_25048950	AT1G67090	AT1G67090.1,AT1G67090.2	RBCS-1A	-	T	C	0.00128604	165	1.00096	1.25114e-07
1_25048953	AT1G67090	AT1G67090.1,AT1G67090.2	RBCS-1A	-	T	C	0.00313532	396	0.861112	2.15272e-05
1_25049255	AT1G67090	AT1G67090.1,AT1G67090.2	RBCS-1A	-	T	C	0.00688259	51	0.927257	0.00577183
1_25163734	AT1G67250	AT1G67250.1	AT1G67250	-	T	C	0.156863	32	0.916813	0.0193356
1_25262349	AT1G67430	AT1G67430.1,AT1G67430.2	RPL17B	+	A	G	0.144244	1723	0.181524	3.66604e-06
1_25262481	AT1G67430	AT1G67430.1,AT1G67430.2	RPL17B	+	A	G	0.0138913	244	0.227623	0.0807654
1_25262960	AT1G67430	AT1G67430.1,AT1G67430.2	RPL17B	+	A	G	0.00450302	109	0.338868	0.0696841
1_25262961	AT1G67430	AT1G67430.1,AT1G67430.2	RPL17B	+	A	G	0.0233306	544	0.31033	3.67328e-11
1_25262967	AT1G67430	AT1G67430.1,AT1G67430.2	RPL17B	+	A	G	0.0145342	295	0.182213	1.33561e-05
1_25262973	AT1G67430	AT1G67430.1,AT1G67430.2	RPL17B	+	A	G	0.000785764	17	1.70804	0.00246253
1_25263005	AT1G67430	AT1G67430.1,AT1G67430.2	RPL17B	+	A	G	0.00436364	72	0.451484	0.0404356
1_25263338	AT1G67430	AT1G67430.1	RPL17B	+	A	G	0.00285733	44	1.37459	0.00667535
1_25263474	AT1G67430	AT1G67430.1,AT1G67430.2	RPL17B	+	A	G	0.00965572	122	0.398437	0.0344251
1_25263626	AT1G67430	AT1G67430.1,AT1G67430.2	RPL17B	+	A	G	0.0447587	383	0.0852931	0.0276082
1_25263641	AT1G67430	AT1G67430.1,AT1G67430.2	RPL17B	+	A	G	0.0116127	89	0.691946	0.00549501
1_25263692	AT1G67430	AT1G67430.1,AT1G67430.2	RPL17B	+	A	G	0.0126518	50	0.471342	0.0222343
1_25393235	AT1G67730	AT1G67730.1	KCR1	+	A	G	0.0295749	48	1.11222	0.00563626
1_25393359	AT1G67730	AT1G67730.1	KCR1	+	A	G	0.149866	168	0.30119	0.0194022
1_25394630	AT1G67740	AT1G67740.1	PSBY	-	T	C	0.00174728	44	0.714388	0.0171828
1_26179219	AT1G69587	AT1G69587.1,AT1G69587.2,AT1G69587.3,AT1G69587.4	AT1G69587	-	T	C	0.114894	27	1.31491	0.033097
1_26231927	AT1G69740	AT1G69740.1,AT1G69740.2,AT1G69740.3	HEMB1	+	A	G	0.00493612	17	2.235	0.021581
1_26248605	AT1G69770	AT1G69770.1	CMT3	-	T	C	0.150628	72	0.688018	0.014176
1_26248634	AT1G69770	AT1G69770.1	CMT3	-	T	C	0.264151	140	0.472561	0.00488992
1_26288594	AT1G69830	AT1G69830.1	AMY3	-	T	C	0.0407747	40	1.21442	0.0526139
1_26534159	AT1G70410	AT1G70410.2,AT1G70410.1	BCA4	-	T	C	0.0214988	35	1.49345	0.00958494
1_26621164	AT1G70600	AT1G70600.1	RPL27AC	-	T	C	0.183713	1128	0.162341	2.04138e-08
1_26621230	AT1G70600	AT1G70600.1	RPL27AC	-	T	C	0.05044	533	0.093485	0.0360481
1_26621509	AT1G70600	AT1G70600.1	RPL27AC	-	T	C	0.0138091	334	0.094818	0.0106372
1_26688422	AT1G70770	AT1G70770.1	AT1G70770	-	T	C	0.210407	93	0.333121	0.0367179
1_26688423	AT1G70770	AT1G70770.1	AT1G70770	-	T	C	0.102381	43	0.575041	0.00920975
1_26688469	AT1G70770	AT1G70770.1	AT1G70770	-	T	C	0.0232221	16	2.60641	0.0369878
1_26689829	AT1G70770	AT1G70770.1,AT1G70770.2	AT1G70770	-	T	C	0.148624	162	0.469177	0.00113523
1_27109405	AT1G72020	AT1G72020.1	AT1G72020	-	T	C	0.0531873	136	0.589266	4.42664e-05
1_27109417	AT1G72020	AT1G72020.1	AT1G72020	-	T	C	0.0733808	196	0.527165	0.000233776
1_27109424	AT1G72020	AT1G72020.1	AT1G72020	-	T	C	0.171449	472	0.448321	0.000108355
1_27109454	AT1G72020	AT1G72020.1	AT1G72020	-	T	C	0.0118164	43	0.821272	0.0543801
1_27109736	AT1G72020	AT1G72020.1	AT1G72020	-	T	C	0.0165067	141	0.177412	0.0790108
1_27243081	AT1G72370	AT1G72370.1,AT1G72370.2	RPSAA	-	T	C	0.013362	87	0.666923	0.001418
1_27243149	AT1G72370	AT1G72370.1,AT1G72370.2	RPSAA	-	T	C	0.00762027	83	0.341784	0.0135833
1_27243710	AT1G72370	AT1G72370.1,AT1G72370.2	RPSAA	-	T	C	0.00701042	76	0.319203	0.0911754
1_27244054	AT1G72370	AT1G72370.1,AT1G72370.2	RPSAA	-	T	C	0.00768959	109	0.348854	0.022073
1_27244105	AT1G72370	AT1G72370.1,AT1G72370.2	RPSAA	-	T	C	0.00212028	33	0.959119	0.00183838
1_27244152	AT1G72370	AT1G72370.1,AT1G72370.2	RPSAA	-	T	C	0.0394802	638	0.175782	9.26244e-09
1_27244721	AT1G72370	AT1G72370.1,AT1G72370.2	RPSAA	-	T	C	0.0489758	844	0.274085	4.86441e-10
1_27346751	AT1G72640	AT1G72640.2,AT1G72640.1,AT1G72640.4,AT1G72640.3	AT1G72640	-	T	C	0.139623	111	0.548445	0.0666608
1_27479144	AT1G73060	AT1G73060.1	LPA3	+	A	G	0.0190424	35	1.10011	0.0211943
1_27518569	AT1G73180	AT1G73180.1,AT1G73180.2	AT1G73180	+	A	G	0.0285088	13	1.4789	0.0664319
1_27540293	AT1G73230	AT1G73230.1	AT1G73230	-	T	C	0.278032	243	0.45511	0.000691934
1_27540294	AT1G73230	AT1G73230.1	AT1G73230	-	T	C	0.0436782	38	1.30422	0.00175256
1_27540342	AT1G73230	AT1G73230.1	AT1G73230	-	T	C	0.0224791	35	1.01818	0.0294313
1_27540343	AT1G73230	AT1G73230.1	AT1G73230	-	T	C	0.332457	506	0.325547	1.1437e-07
1_27540495	AT1G73230	AT1G73230.1	AT1G73230	-	T	C	0.0122966	68	0.464702	0.0436034
1_27540641	AT1G73230	AT1G73230.1	AT1G73230	-	T	C	0.0015676	12	0.744969	0.086864
1_27540666	AT1G73230	AT1G73230.1	AT1G73230	-	T	C	0.0117689	100	0.111762	0.0785594
1_27787610	AT1G73885	AT1G73885.1	AT1G73885	+	A	G	0.01002	45	0.573996	0.0236515
1_27928444	AT1G74270	AT1G74270.1	RPL35AC	-	T	C	0.011389	51	0.611305	0.00376963
1_27928453	AT1G74270	AT1G74270.1	RPL35AC	-	T	C	0.046651	218	0.334434	7.04996e-05
1_28152131	AT1G74960	AT1G74960.2,AT1G74960.3	KAS2	-	T	C	0.0596787	78	0.541096	0.0786203
1_28152673	AT1G74960	AT1G74960.1,AT1G74960.2,AT1G74960.3	KAS2	-	T	C	0.0379872	154	0.501985	0.0102058
1_28157604	AT1G74970	AT1G74970.1	RPS9	-	T	C	0.0380711	30	2.38285	0.00412525
1_28157605	AT1G74970	AT1G74970.1	RPS9	-	T	C	0.143939	114	1.03008	9.3389e-05
1_28158007	AT1G74970	AT1G74970.1	RPS9	-	T	C	0.0178368	141	0.665047	0.0208305
1_28229860	AT1G75220	AT1G75220.1	AT1G75220	-	T	C	0.0570962	35	1.36727	0.0715738
1_28272656	AT1G75350	AT1G75350.1	RPL31	+	A	G	0.00421138	31	0.635869	0.0315136
1_28371601	AT1G75560	AT1G75560.1,AT1G75560.2	AT1G75560	-	T	C	0.05689	45	0.626174	0.0775784
1_28402078	AT1G75630	AT1G75630.1,AT1G75630.2	VHA-C4	+	A	G	0.0298399	41	1.8739	6.23968e-05
1_28422274	AT1G75690	AT1G75690.1	LQY1	-	T	C	0.0358696	231	0.833392	4.67537e-06
1_28517418	AT1G75950	AT1G75950.1	SKP1A	+	A	G	0.0119889	78	0.800683	0.0666216
1_28528362	AT1G76010	AT1G76010.1,AT1G76010.2	AT1G76010	-	T	C	0.348706	741	0.160006	0.00105169
1_28528464	AT1G76010	AT1G76010.1,AT1G76010.2	AT1G76010	-	T	C	0.0361658	123	0.619391	0.000624323
1_28528465	AT1G76010	AT1G76010.1,AT1G76010.2	AT1G76010	-	T	C	0.0262544	90	0.71005	0.0129031
1_28528471	AT1G76010	AT1G76010.1,AT1G76010.2	AT1G76010	-	T	C	0.0377647	148	0.273437	0.00822313
1_28528474	AT1G76010	AT1G76010.1,AT1G76010.2	AT1G76010	-	T	C	0.0141461	55	0.308542	0.0870656
1_28528477	AT1G76010	AT1G76010.1,AT1G76010.2	AT1G76010	-	T	C	0.068348	271	0.492485	3.41021e-09
1_28528478	AT1G76010	AT1G76010.1,AT1G76010.2	AT1G76010	-	T	C	0.00316071	13	2.25665	0.0551739
1_28573329	AT1G76140	AT1G76140.1,AT1G76140.2	AT1G76140	+	A	G	0.0597826	33	1.0661	0.0227317
1_28573372	AT1G76140	AT1G76140.1,AT1G76140.2	AT1G76140	+	A	G	0.0614035	35	1.85397	0.00570873
1_28573913	AT1G76140	AT1G76140.1,AT1G76140.2	AT1G76140	+	A	G	0.101902	150	0.961717	7.65121e-05
1_28578200	AT1G76160	AT1G76160.1	sks5	-	T	C	0.074579	93	0.098489	0.0601441
1_28593421	AT1G76200	AT1G76200.1	AT1G76200	+	A	G	0.00705882	60	0.499912	0.0530758
1_28594513	AT1G76200	AT1G76200.1	AT1G76200	+	A	G	0.104584	486	0.365568	1.4836e-06
1_28594560	AT1G76200	AT1G76200.1	AT1G76200	+	A	G	0.0863121	297	0.308783	7.21065e-07
1_28594580	AT1G76200	AT1G76200.1	AT1G76200	+	A	G	0.0122117	36	0.0688283	0.0960255
1_28627102	AT1G76300	AT1G76300.1	SMD3A	+	A	G	0.105042	200	0.442796	0.00882461
1_28698414	AT1G76490	AT1G76490.1	HMG1	+	A	G	0.0235804	49	0.782542	0.0138797
1_29149594	AT1G77590	AT1G77590.1,AT1G77590.2	LACS9	-	T	C	0.0572246	80	1.0199	0.00257741
1_29304138	AT1G77940	AT1G77940.1	RPL30B	-	T	C	0.00417591	32	0.714168	0.0162696
1_29305085	AT1G77940	AT1G77940.1	RPL30B	-	T	C	0.0031852	62	0.126842	0.0400518
1_29346524	AT1G78040	AT1G78040.1,AT1G78040.2,AT1G78040.3	AT1G78040	+	A	G	0.0121064	333	0.328508	3.06423e-06
1_29546852	AT1G78560	AT1G78560.1	BASS1	-	T	C	0.0869565	40	1.11963	0.0613305
1_29547107	AT1G78560	AT1G78560.1	BASS1	-	T	C	0.0414053	33	1.37072	0.0144242
1_29573825	AT1G78620	AT1G78620.1,AT1G78620.2	AT1G78620	-	T	C	0.0502513	30	1.08523	0.0166296
1_29575590	AT1G78620	AT1G78620.1,AT1G78620.2	AT1G78620	-	T	C	0.0705024	87	0.411136	0.0470848
1_29576705	AT1G78630	AT1G78630.1	RPL13	+	A	G	0.0408957	904	0.21802	0.0473903
1_29577032	AT1G78630	AT1G78630.1	RPL13	+	A	G	0.065815	1561	0.397649	8.64999e-12
1_29577296	AT1G78630	AT1G78630.1	RPL13	+	A	G	0.00741163	182	0.633352	0.0277166
1_29577468	AT1G78630	AT1G78630.1	RPL13	+	A	G	0.0801824	598	0.297797	1.96721e-05
1_29577608	AT1G78630	AT1G78630.1	RPL13	+	A	G	0.160665	58	0.66404	0.000707242
1_29586246	AT1G78660	AT1G78660.1,AT1G78660.2	GGH1	+	A	G	0.0436006	31	1.08006	0.096658
1_29662883	AT1G78900	AT1G78900.1,AT1G78900.2	VHA-A	+	A	G	0.0754551	257	0.286096	3.53075e-05
1_29664566	AT1G78900	AT1G78900.1,AT1G78900.2	VHA-A	+	A	G	0.0337368	131	0.24995	0.0845543
1_29667746	AT1G78915	AT1G78915.1,AT1G78915.3,AT1G78915.2	AT1G78915	-	T	C	0.134752	38	0.515352	0.0811097
1_29725124	AT1G79010	AT1G79010.1	AT1G79010	-	T	C	0.0951466	198	0.389341	0.0231991
1_29725231	AT1G79010	AT1G79010.1	AT1G79010	-	T	C	0.0101523	30	0.475757	0.0883903
1_29725422	AT1G79010	AT1G79010.1	AT1G79010	-	T	C	0.00635978	21	1.70377	0.0512396
1_29736146	AT1G79040	AT1G79040.1	PSBR	+	A	G	0.000216649	13	0.859476	0.0830201
1_29736165	AT1G79040	AT1G79040.1	PSBR	+	A	G	0.00194275	143	0.524291	0.0597693
1_29746676	AT1G79075	AT1G79075.1,AT1G79075.2	AT1G79075	+	A	G	0.250423	592	0.0939647	0.00918715
1_29746683	AT1G79075	AT1G79075.1,AT1G79075.2	AT1G79075	+	A	G	0.501357	1293	0.20781	2.66871e-06
1_29796460	AT1G79210	AT1G79210.1,AT1G79210.2,AT1G79210.3	PAB2	-	T	C	0.039551	74	0.491875	0.0130045
1_29916247	AT1G79530	AT1G79530.1	GAPCP1	-	T	C	0.141743	109	0.212175	0.00660736
1_29924818	AT1G79550	AT1G79550.1,AT1G79550.2	PGK	-	T	C	0.0317615	163	0.22369	0.00170561
1_30007431	AT1G79750	AT1G79750.1	NADP-ME4	-	T	C	0.215139	54	0.946588	0.0177411
1_30007666	AT1G79750	AT1G79750.1	NADP-ME4	-	T	C	0.0464672	73	0.665647	0.00516408
1_30007896	AT1G79750	AT1G79750.1	NADP-ME4	-	T	C	0.0462312	92	0.545098	0.0124987
1_30009737	AT1G79750	AT1G79750.1	NADP-ME4	-	T	C	0.0345876	91	0.48073	0.00309612
1_30017748	AT1G79790	AT1G79790.1,AT1G79790.2,AT1G79790.4	AT1G79790	-	T	C	0.010877	16	2.19753	0.00909218
1_30041533	AT1G79850	AT1G79850.1	RPS17	-	T	C	0.00727543	98	0.432729	0.00869743
1_30058862	AT1G79920	AT1G79920.1,AT1G79920.2	HSP70-15	-	T	C	0.0967742	105	0.514592	0.0252548
1_30169779	AT1G80230	AT1G80230.1	COX5B-2	-	T	C	0.0103712	19	0.785302	0.0968426
1_30272253	AT1G80500	AT1G80500.1,AT1G80500.2	AT1G80500	+	A	G	0.0397727	91	0.363873	0.0660382
1_30272417	AT1G80500	AT1G80500.1,AT1G80500.2	AT1G80500	+	A	G	0.00747986	13	1.26018	0.0479323
1_30314139	AT1G80640	AT1G80640.1,AT1G80640.2	AT1G80640	+	A	G	0.0949033	54	0.675794	0.0556841
1_30320799	AT1G80670	AT1G80670.1	RAE1	-	T	C	0.0849421	22	1.81615	0.00809582
1_30322251	AT1G80670	AT1G80670.1	RAE1	-	T	C	0.111111	57	1.29185	9.17574e-05
2_133050	AT2G01250	AT2G01250.1,AT2G01250.2	RPL7B	-	T	C	0.125332	1274	0.17328	4.30408e-05
2_133313	AT2G01250	AT2G01250.1,AT2G01250.2	RPL7B	-	T	C	0.0492187	652	0.360956	7.87545e-10
2_223206	AT2G01490	AT2G01490.1,AT2G01490.2	PAHX	+	A	G	0.135286	97	0.347425	0.015557
2_452114	AT2G01970	AT2G01970.1	TMN3	-	T	C	0.0894454	50	0.931693	0.010556
2_490202	AT2G02050	AT2G02050.1	AT2G02050	+	A	G	0.0104405	32	0.822453	0.014176
2_673535	AT2G02510	AT2G02510.1	AT2G02510	+	A	G	0.0301878	127	0.307039	0.0621347
2_674525	AT2G02510	AT2G02510.1	AT2G02510	+	A	G	0.0263266	64	0.43273	0.0580147
2_674529	AT2G02510	AT2G02510.1	AT2G02510	+	A	G	0.0637002	136	0.275177	0.0806409
2_674549	AT2G02510	AT2G02510.1	AT2G02510	+	A	G	0.203026	322	0.351953	0.00014547
2_771125	AT2G02740	AT2G02740.1	WHY3	+	A	G	0.130435	39	0.790099	0.0871208
2_771135	AT2G02740	AT2G02740.1	WHY3	+	A	G	0.07393	19	1.01207	0.0978057
2_775235	AT2G02760	AT2G02760.1,AT2G02760.2,AT2G02760.3,AT2G02760.4	UBC2	+	A	G	0.128532	141	0.482829	0.000786126
2_1285885	AT2G04030	AT2G04030.1,AT2G04030.2	CR88	+	A	G	0.00481481	13	2.27893	0.0836242
2_1285919	AT2G04030	AT2G04030.1,AT2G04030.2	CR88	+	A	G	0.0982962	225	0.164611	0.020028
2_1286003	AT2G04030	AT2G04030.1,AT2G04030.2	CR88	+	A	G	0.0639175	62	1.41671	0.000491422
2_1519714	AT2G04360	AT2G04360.1,AT2G04360.4,AT2G04360.2,AT2G04360.3	AT2G04360	-	T	C	0.0462342	62	1.36324	0.0108352
2_1519917	AT2G04360	AT2G04360.1,AT2G04360.4,AT2G04360.2,AT2G04360.3	AT2G04360	-	T	C	0.0341034	62	0.880369	0.000631649
2_1520390	AT2G04360	AT2G04360.1,AT2G04360.4,AT2G04360.2,AT2G04360.3	AT2G04360	-	T	C	0.0260989	19	2.3755	0.00282558
2_1528332	AT2G04390	AT2G04390.1	RPS17A	+	A	G	0.0475059	160	0.241269	0.0164821
2_1619779	AT2G04630	AT2G04630.1	NRPB6B	-	T	C	0.00963082	18	0.862447	0.0199529
2_1647260	AT2G04700	AT2G04700.1,AT2G04700.2	FTRC	+	A	G	0.01641	65	1.29608	0.000285368
2_1648384	AT2G04700	AT2G04700.1,AT2G04700.2	FTRC	+	A	G	0.00689906	19	1.86963	0.0198003
2_1894696	AT2G05220	AT2G05220.1,AT2G05220.2	RPS17B	-	T	C	0.0363081	107	0.444586	0.00202222
2_1894761	AT2G05220	AT2G05220.1,AT2G05220.2	RPS17B	-	T	C	0.0285714	159	0.302615	0.000123603
2_2236008	AT2G05840	AT2G05840.1,AT2G05840.2,AT2G05840.3	PAA2	+	A	G	0.0190476	46	1.0315	0.00059387
2_4621107	AT2G11520	AT2G11520.1	CRCK3	+	A	G	0.300752	80	0.476051	0.0182728
2_4621113	AT2G11520	AT2G11520.1	CRCK3	+	A	G	0.227273	60	0.36695	0.0411778
2_5539425	AT2G13360	AT2G13360.1,AT2G13360.2,AT2G13360.3	AGT1	-	T	C	0.00594832	61	0.747626	0.0284622
2_6642787	AT2G15290	AT2G15290.1	TIC21	-	T	C	0.0104167	22	1.78591	0.0187846
2_6642806	AT2G15290	AT2G15290.1	TIC21	-	T	C	0.0100968	24	0.680669	0.0793074
2_6643412	AT2G15290	AT2G15290.1	TIC21	-	T	C	0.0130719	32	1.30819	0.0294481
2_7343088	AT2G16940	AT2G16940.1,AT2G16940.4,AT2G16940.2,AT2G16940.3	AT2G16940	-	T	C	0.2494	104	0.103414	0.054886
2_7547816	AT2G17360	AT2G17360.1,AT2G17360.2	RPS4A	+	A	G	0.012617	120	0.362064	0.0995392
2_7547821	AT2G17360	AT2G17360.1,AT2G17360.2	RPS4A	+	A	G	0.00530166	50	0.636374	0.0287848
2_7547834	AT2G17360	AT2G17360.1,AT2G17360.2	RPS4A	+	A	G	0.0075264	67	0.470052	0.0416682
2_7547869	AT2G17360	AT2G17360.1,AT2G17360.2	RPS4A	+	A	G	0.0316944	263	0.207594	9.39763e-05
2_7547872	AT2G17360	AT2G17360.1,AT2G17360.2	RPS4A	+	A	G	0.0146869	114	0.295907	0.0251496
2_7547873	AT2G17360	AT2G17360.1,AT2G17360.2	RPS4A	+	A	G	0.113178	925	0.192357	7.42389e-05
2_7548140	AT2G17360	AT2G17360.1,AT2G17360.2	RPS4A	+	A	G	0.351759	2170	0.201353	0.000454741
2_7548144	AT2G17360	AT2G17360.1,AT2G17360.2	RPS4A	+	A	G	0.0152146	95	0.53055	9.53195e-05
2_7548173	AT2G17360	AT2G17360.1,AT2G17360.2	RPS4A	+	A	G	0.0107422	55	0.75019	0.0332146
2_7557727	AT2G17390	AT2G17390.1	AKR2B	+	A	G	0.010989	17	2.08967	0.0853003
2_7642478	AT2G17560	AT2G17560.1,AT2G17560.3	HMGB4	-	T	C	0.427549	717	0.247971	3.73713e-07
2_7699166	AT2G17720	AT2G17720.1	P4H5	+	A	G	0.035	21	2.08957	0.0276839
2_7837390	AT2G18020	AT2G18020.1	RPL8A	+	A	G	0.0135135	221	0.297502	3.7737e-06
2_7837876	AT2G18020	AT2G18020.1	RPL8A	+	A	G	0.00515722	72	0.426259	0.0485871
2_7837975	AT2G18020	AT2G18020.1	RPL8A	+	A	G	0.0193756	301	0.407392	5.84608e-06
2_7838159	AT2G18020	AT2G18020.1	RPL8A	+	A	G	0.00901623	45	0.364258	0.0426572
2_7989248	AT2G18390	AT2G18390.1	ARL2	+	A	G	0.0252672	26	0.804891	0.0213571
2_8124427	AT2G18740	AT2G18740.1,AT2G18740.2	AT2G18740	+	A	G	0.0103939	19	1.5559	0.0306097
2_8457268	AT2G19520	AT2G19520.1	MSI4	+	A	G	0.0960352	109	0.32887	0.0440048
2_8457915	AT2G19520	AT2G19520.1	MSI4	+	A	G	0.040797	43	1.07377	0.00193148
2_8459146	AT2G19520	AT2G19520.1	MSI4	+	A	G	0.0128988	19	1.07911	0.0574531
2_8459166	AT2G19520	AT2G19520.1	MSI4	+	A	G	0.0257566	40	1.73178	2.48782e-05
2_8459201	AT2G19520	AT2G19520.1	MSI4	+	A	G	0.0120101	19	1.11404	0.0652946
2_8459279	AT2G19520	AT2G19520.1	MSI4	+	A	G	0.136659	189	0.356419	0.000258236
2_8459449	AT2G19520	AT2G19520.1	MSI4	+	A	G	0.0995475	22	1.34844	0.00586989
2_8464020	AT2G19540	AT2G19540.1	AT2G19540	+	A	G	0.0264106	44	0.677891	0.0227012
2_8510314	AT2G19720	AT2G19720.1	RPS15AB	-	T	C	0.0733945	24	0.42083	0.00373388
2_8511834	AT2G19730	AT2G19730.1,AT2G19730.2,AT2G19730.3	RPL28A	+	A	G	0.000756468	15	1.17241	0.0167126
2_8512412	AT2G19730	AT2G19730.1,AT2G19730.2,AT2G19730.3	RPL28A	+	A	G	0.0243483	425	0.115836	0.00920975
2_8512478	AT2G19730	AT2G19730.1,AT2G19730.2,AT2G19730.3	RPL28A	+	A	G	0.00949403	167	0.187203	3.87311e-05
2_8512995	AT2G19730	AT2G19730.1,AT2G19730.2,AT2G19730.3	RPL28A	+	A	G	0.0417563	330	0.417736	4.18829e-07
2_8514247	AT2G19740	AT2G19740.1	RPL31A	+	A	G	0.253607	791	0.323469	7.10075e-12
2_8515865	AT2G19750	AT2G19750.1	RPS30C	+	A	G	0.00753201	30	0.38791	0.0410472
2_8515891	AT2G19750	AT2G19750.1	RPS30C	+	A	G	0.0743494	220	0.187742	0.00106755
2_8739992	AT2G20280	AT2G20280.1	AT2G20280	-	T	C	0.081761	26	1.13951	0.0205585
2_8789073	AT2G20360	AT2G20360.1	AT2G20360	+	A	G	0.0352817	67	0.504976	0.0108568
2_8807890	AT2G20420	AT2G20420.1	AT2G20420	+	A	G	0.0302198	55	0.786784	0.00209973
2_8843746	AT2G20530	AT2G20530.1,AT2G20530.2	PHB6	+	A	G	0.171892	318	0.341392	4.80505e-06
2_8864421	AT2G20580	AT2G20580.1	RPN1A	+	A	G	0.057971	104	0.725999	0.00269964
2_8934734	AT2G20725	AT2G20725.1	AT2G20725	-	T	C	0.275928	290	0.326384	0.0389619
2_8987963	AT2G20890	AT2G20890.1	THF1	+	A	G	0.0077868	71	0.262599	0.0792389
2_8988180	AT2G20890	AT2G20890.1	THF1	+	A	G	0.0133779	88	1.1485	0.000157487
2_8988510	AT2G20890	AT2G20890.1	THF1	+	A	G	0.0119778	82	0.70231	0.0228206
2_8988565	AT2G20890	AT2G20890.1	THF1	+	A	G	0.00263736	18	0.738661	0.0981194
2_8988627	AT2G20890	AT2G20890.1	THF1	+	A	G	0.00668295	52	1.63401	0.00224283
2_8989130	AT2G20890	AT2G20890.1	THF1	+	A	G	0.00243196	21	1.59676	0.00416726
2_8989333	AT2G20890	AT2G20890.1	THF1	+	A	G	0.107692	35	1.31202	0.0233724
2_9070018	AT2G21160	AT2G21160.1	AT2G21160	+	A	G	0.0180018	80	0.468348	0.0291139
2_9071018	AT2G21170	AT2G21170.1,AT2G21170.2	TIM	-	T	C	0.0339115	262	0.225219	0.0136595
2_9071030	AT2G21170	AT2G21170.1,AT2G21170.2	TIM	-	T	C	0.0321459	268	0.273999	9.12943e-06
2_9071619	AT2G21170	AT2G21170.1,AT2G21170.2	TIM	-	T	C	0.010989	96	0.488957	0.000583495
2_9138891	AT2G21370	AT2G21370.1,AT2G21370.4,AT2G21370.3,AT2G21370.2	XK-1	-	T	C	0.102244	41	1.1881	0.00111177
2_9237258	AT2G21580	AT2G21580.1,AT2G21580.2	RPS25B	+	A	G	0.00424829	54	0.586241	0.0725836
2_9237400	AT2G21580	AT2G21580.1,AT2G21580.2	RPS25B	+	A	G	0.218284	2593	0.331903	1.58423e-11
2_9237427	AT2G21580	AT2G21580.1,AT2G21580.2	RPS25B	+	A	G	0.0291291	291	0.12072	0.00312343
2_9237435	AT2G21580	AT2G21580.1,AT2G21580.2	RPS25B	+	A	G	0.056834	531	0.373557	2.26627e-06
2_9237436	AT2G21580	AT2G21580.1,AT2G21580.2	RPS25B	+	A	G	0.0159204	144	0.612461	6.00885e-05
2_9237443	AT2G21580	AT2G21580.1,AT2G21580.2	RPS25B	+	A	G	0.0232927	191	0.487976	1.97502e-07
2_9237503	AT2G21580	AT2G21580.1,AT2G21580.2	RPS25B	+	A	G	0.0377122	211	0.446744	3.24749e-07
2_9320281	AT2G21870	AT2G21870.1,AT2G21870.2	MGP1	-	T	C	0.0626506	78	1.42745	3.48069e-06
2_9320620	AT2G21870	AT2G21870.1,AT2G21870.2	MGP1	-	T	C	0.0333676	195	0.526043	0.00285223
2_9320622	AT2G21870	AT2G21870.1,AT2G21870.2	MGP1	-	T	C	0.0355718	214	0.296416	0.0204865
2_9356957	AT2G21960	AT2G21960.1	AT2G21960	+	A	G	0.101591	83	0.764818	0.000568517
2_9396681	AT2G22120	AT2G22120.1,AT2G22120.2	AT2G22120	+	A	G	0.0646259	19	0.828829	0.0869389
2_9451391	AT2G22230	AT2G22230.1	AT2G22230	+	A	G	0.0587045	87	0.785124	0.0105001
2_9451432	AT2G22230	AT2G22230.1	AT2G22230	+	A	G	0.0402865	45	0.706934	0.0387192
2_9504965	AT2G22400	AT2G22400.1	AT2G22400	-	T	C	0.239437	136	0.364224	0.0196345
2_9505497	AT2G22400	AT2G22400.1	AT2G22400	-	T	C	0.0917031	84	1.08172	9.07349e-05
2_9544742	AT2G22475	AT2G22475.1,AT2G22475.2	GEM	+	A	G	0.0615385	20	0.880435	0.0840346
2_9637396	AT2G22670	AT2G22670.4,AT2G22670.2,AT2G22670.1	IAA8	+	A	G	0.0286981	110	1.05284	1.7544e-05
2_9637452	AT2G22670	AT2G22670.4,AT2G22670.2,AT2G22670.1	IAA8	+	A	G	0.0409247	131	0.962441	2.11091e-06
2_9637457	AT2G22670	AT2G22670.4,AT2G22670.2,AT2G22670.1	IAA8	+	A	G	0.0205296	69	0.927802	0.0209064
2_9637573	AT2G22670	AT2G22670.4,AT2G22670.2,AT2G22670.1	IAA8	+	A	G	0.00797091	57	1.84745	2.03232e-06
2_9638099	AT2G22670	AT2G22670.4,AT2G22670.2,AT2G22670.1	IAA8	+	A	G	0.00518238	26	1.25443	0.0313783
2_9638446	AT2G22670	AT2G22670.4,AT2G22670.2,AT2G22670.1	IAA8	+	A	G	0.00984252	30	1.1936	0.0775746
2_9789008	AT2G22990	AT2G22990.1,AT2G22990.3,AT2G22990.4,AT2G22990.5,AT2G22990.2,AT2G22990.6	SCPL8	+	A	G	0.0614973	207	0.516264	0.000374739
2_9829772	AT2G23090	AT2G23090.1	AT2G23090	-	T	C	0.0614686	853	0.147402	0.0353584
2_9943333	AT2G23350	AT2G23350.1	PAB4	+	A	G	0.00625	18	0.869065	0.0680012
2_9943420	AT2G23350	AT2G23350.1	PAB4	+	A	G	0.0186891	69	0.839352	0.00146278
2_9943495	AT2G23350	AT2G23350.1	PAB4	+	A	G	0.0882273	326	0.515751	4.24033e-08
2_9943836	AT2G23350	AT2G23350.1	PAB4	+	A	G	0.0492397	136	0.571467	3.93733e-05
2_9944452	AT2G23350	AT2G23350.1	PAB4	+	A	G	0.0138348	32	1.08948	0.0560119
2_9944907	AT2G23350	AT2G23350.1	PAB4	+	A	G	0.018	72	0.834118	0.00247104
2_9945547	AT2G23350	AT2G23350.1	PAB4	+	A	G	0.134478	415	0.280934	0.00252948
2_9945551	AT2G23350	AT2G23350.1	PAB4	+	A	G	0.0124524	36	2.20119	1.55967e-05
2_9945662	AT2G23350	AT2G23350.1	PAB4	+	A	G	0.0314286	110	0.644633	0.0046928
2_9945678	AT2G23350	AT2G23350.1	PAB4	+	A	G	0.0178571	57	0.588967	0.0391477
2_10124030	AT2G23780	AT2G23780.1,AT2G23780.2,AT2G23780.3	AT2G23780	-	T	C	0.0378788	20	1.56272	0.0764733
2_10183157	AT2G23930	AT2G23930.1,AT2G23930.2	SNRNP-G	+	A	G	0.0185615	32	0.693294	0.0633585
2_10217780	AT2G24020	AT2G24020.1,AT2G24020.2	AT2G24020	-	T	C	0.217213	106	0.749064	3.05262e-07
2_10243419	AT2G24090	AT2G24090.1	AT2G24090	+	A	G	0.0338965	317	0.601253	2.32992e-06
2_10243421	AT2G24090	AT2G24090.1	AT2G24090	+	A	G	0.0195908	180	0.699042	0.000257171
2_10562789	AT2G24765	AT2G24765.1,AT2G24765.2	ARF3	+	A	G	0.184353	238	0.245045	0.00717957
2_10763121	AT2G25280	AT2G25280.1	AT2G25280	-	T	C	0.048105	33	0.563163	0.0986742
2_10902263	AT2G25610	AT2G25610.2,AT2G25610.1	VHA-c''2	-	T	C	0.0109994	58	0.565452	0.0766603
2_10929027	AT2G25670	AT2G25670.1,AT2G25670.2	AT2G25670	-	T	C	0.0186916	20	1.59507	0.0777744
2_11033706	AT2G25870	AT2G25870.1	AT2G25870	+	A	G	0.0261723	24	0.623211	0.0962575
2_11034021	AT2G25870	AT2G25870.1	AT2G25870	+	A	G	0.0205078	21	1.09217	0.00484644
2_11034159	AT2G25870	AT2G25870.1	AT2G25870	+	A	G	0.0201149	21	2.35824	0.00630268
2_11072658	AT2G25970	AT2G25970.1	AT2G25970	-	T	C	0.0129781	19	0.818309	0.0963091
2_11270626	AT2G26500	AT2G26500.1,AT2G26500.2	AT2G26500	+	A	G	0.00223686	36	1.2208	0.0871451
2_11270825	AT2G26500	AT2G26500.1,AT2G26500.3	AT2G26500	+	A	G	0.0227491	71	0.618224	0.00296133
2_11288738	AT2G26540	AT2G26540.1,AT2G26540.3,AT2G26540.2	UROS	-	T	C	0.0241327	16	2.22259	0.0233693
2_11311205	AT2G26590	AT2G26590.1,AT2G26590.4	RPN13	-	T	C	0.0491453	23	1.76085	0.0386479
2_11475084	AT2G26900	AT2G26900.1	BASS2	-	T	C	0.0118499	36	0.285258	0.0783045
2_11528492	AT2G27020	AT2G27020.1,AT2G27020.2	PAG1	-	T	C	0.0431433	84	0.225891	0.0719438
2_11763991	AT2G27530	AT2G27530.1,AT2G27530.2	RPL10AB	-	T	C	0.00531718	86	0.717137	0.00282729
2_11818766	AT2G27720	AT2G27720.1,AT2G27720.3,AT2G27720.2,AT2G27720.4	RPP2A	+	A	G	0.00230559	48	0.276816	0.0311403
2_11819226	AT2G27720	AT2G27720.1,AT2G27720.3,AT2G27720.2,AT2G27720.4	RPP2A	+	A	G	0.00117165	16	0.611421	0.0952219
2_11819456	AT2G27720	AT2G27720.1,AT2G27720.3,AT2G27720.2,AT2G27720.4	RPP2A	+	A	G	0.0282167	150	0.438878	0.0236515
2_11929202	AT2G28000	AT2G28000.1	CPN60A1	+	A	G	0.0262787	149	0.317365	0.00231748
2_12162602	AT2G28450	AT2G28450.1,AT2G28450.2	AT2G28450	-	T	C	0.235294	24	0.811075	0.0981194
2_12356526	AT2G28800	AT2G28800.1,AT2G28800.4,AT2G28800.3	ALB3	-	T	C	0.17265	202	0.324354	0.00617436
2_12416303	AT2G28910	AT2G28910.1,AT2G28910.2,AT2G28910.3	CXIP4	-	T	C	0.0162075	50	0.617019	0.0234172
2_12769180	AT2G29960	AT2G29960.1,AT2G29960.2	CYP19-4	-	T	C	0.269663	192	0.117413	0.0816257
2_12826358	AT2G30050	AT2G30050.1	SEC13B	+	A	G	0.141509	195	0.34065	0.000515134
2_13019435	AT2G30570	AT2G30570.1	PSBW	-	T	C	0.00105651	43	1.09405	0.0205585
2_13019439	AT2G30570	AT2G30570.1	PSBW	-	T	C	0.00729372	307	0.631201	7.2745e-08
2_13142041	AT2G30870	AT2G30870.1	GSTF10	+	A	G	0.0503447	409	0.246811	0.0311606
2_13282823	AT2G31170	AT2G31170.1,AT2G31170.2	SYCO ARATH	-	T	C	0.0212766	11	0.797155	0.0674069
2_13388732	AT2G31400	AT2G31400.1,AT2G31400.2	GUN1	-	T	C	0.011864	45	0.571125	0.0496382
2_13412088	AT2G31490	AT2G31490.1	AT2G31490	+	A	G	0.0103905	58	0.495506	0.0394115
2_13412205	AT2G31490	AT2G31490.1	AT2G31490	+	A	G	0.0218794	217	0.743333	2.71927e-07
2_13413014	AT2G31490	AT2G31490.1	AT2G31490	+	A	G	0.011755	57	0.625524	0.00042605
2_13413031	AT2G31490	AT2G31490.1	AT2G31490	+	A	G	0.00371839	15	2.66493	0.00681246
2_13413056	AT2G31490	AT2G31490.1	AT2G31490	+	A	G	0.15136	501	0.380429	9.61185e-07
2_13413069	AT2G31490	AT2G31490.1	AT2G31490	+	A	G	0.0225819	60	0.475046	0.0227849
2_13438199	AT2G31570	AT2G31570.1	GPX2	-	T	C	0.0522648	105	0.286398	0.00329779
2_13557545	AT2G31890	AT2G31890.1	ATRAP	-	T	C	0.0883978	48	1.1521	0.00486057
2_13639608	AT2G32060	AT2G32060.1,AT2G32060.2,AT2G32060.3	RPS12C	-	T	C	0.0103136	99	0.669534	0.00359131
2_13871102	AT2G32700	AT2G32700.1,AT2G32700.6,AT2G32700.7	LUH	+	A	G	0.0367232	13	1.41812	0.0954223
2_13877049	AT2G32720	AT2G32720.1,AT2G32720.2	CYTB5-B	-	T	C	0.113765	181	0.303713	0.00423523
2_13919860	AT2G32810	AT2G32810.1,AT2G32810.2	BGAL9	-	T	C	0.0493421	15	1.16348	0.00476445
2_13962569	AT2G32920	AT2G32920.1	PDIL2-3	-	T	C	0.0532359	51	0.63622	0.0677427
2_14019060	AT2G33040	AT2G33040.1	ATPC	-	T	C	0.0114093	71	0.76316	0.00745179
2_14047801	AT2G33150	AT2G33150.1	PED1	-	T	C	0.0175649	44	0.375944	0.071095
2_14050048	AT2G33150	AT2G33150.1	PED1	-	T	C	0.0809389	200	0.637967	4.72274e-06
2_14143688	AT2G33370	AT2G33370.1,AT2G33370.2	RPL23C	-	T	C	0.0053392	17	2.01815	0.0850601
2_14143717	AT2G33370	AT2G33370.1,AT2G33370.2	RPL23C	-	T	C	0.0102994	43	0.897494	0.000691934
2_14143731	AT2G33370	AT2G33370.1,AT2G33370.2	RPL23C	-	T	C	0.0418339	198	0.444017	0.0402292
2_14143750	AT2G33370	AT2G33370.1,AT2G33370.2	RPL23C	-	T	C	0.0140872	74	0.437383	0.00774161
2_14144069	AT2G33370	AT2G33370.1,AT2G33370.2	RPL23C	-	T	C	0.0209127	203	0.312769	0.00640876
2_14144094	AT2G33370	AT2G33370.1,AT2G33370.2	RPL23C	-	T	C	0.0060029	58	1.01144	0.00129964
2_14144132	AT2G33370	AT2G33370.1,AT2G33370.2	RPL23C	-	T	C	0.0165858	164	0.684245	3.81747e-06
2_14144241	AT2G33370	AT2G33370.1,AT2G33370.2	RPL23C	-	T	C	0.00162726	17	1.51518	0.0164091
2_14157409	AT2G33410	AT2G33410.1	AT2G33410	+	A	G	0.0550725	152	0.264058	0.00624817
2_14174376	AT2G33450	AT2G33450.1	RPL28	+	A	G	0.00539707	35	0.993755	0.0828877
2_14174379	AT2G33450	AT2G33450.1	RPL28	+	A	G	0.163703	1068	0.473894	7.56378e-16
2_14174383	AT2G33450	AT2G33450.1	RPL28	+	A	G	0.0314339	203	0.683222	3.45811e-07
2_14176584	AT2G33470	AT2G33470.1,AT2G33470.2	GLTP1	-	T	C	0.0331978	49	0.825351	0.0123836
2_14377941	AT2G34040	AT2G34040.1,AT2G34040.3	AT2G34040	-	T	C	0.279346	188	0.42402	0.0216586
2_14463287	AT2G34250	AT2G34250.1,AT2G34250.2,AT2G34250.3	AT2G34250	+	A	G	0.0441891	100	0.270096	0.0489249
2_14464153	AT2G34250	AT2G34250.1,AT2G34250.2,AT2G34250.3	AT2G34250	+	A	G	0.024055	77	0.317645	0.0360013
2_14522795	AT2G34420	AT2G34420.1	LHB1B2	-	T	C	0.000414293	17	-0.953881	0.0658808
2_14523410	AT2G34420	AT2G34420.1	LHB1B2	-	T	C	0.000742501	45	1.43456	0.012747
2_14523432	AT2G34420	AT2G34420.1	LHB1B2	-	T	C	0.00225165	117	1.22127	1.26695e-05
2_14523558	AT2G34420	AT2G34420.1	LHB1B2	-	T	C	0.0439224	43	0.466761	0.0777898
2_14524913	AT2G34430	AT2G34430.1	LHB1B1	+	A	G	0.000560198	24	2.33423	0.0128285
2_14525304	AT2G34430	AT2G34430.1	LHB1B1	+	A	G	0.00122263	67	0.585787	0.0770487
2_14530261	AT2G34460	AT2G34460.1	AT2G34460	+	A	G	0.0105263	27	1.08689	0.0316333
2_14530666	AT2G34460	AT2G34460.1	AT2G34460	+	A	G	0.0614074	137	0.626155	3.32104e-05
2_14531351	AT2G34470	AT2G34470.1,AT2G34470.2	UREG	-	T	C	0.119522	180	0.291016	0.0277657
2_14532816	AT2G34480	AT2G34480.2,AT2G34480.1	RPL18AB	-	T	C	0.0587579	316	0.426937	2.19326e-07
2_14532915	AT2G34480	AT2G34480.2,AT2G34480.1	RPL18AB	-	T	C	0.0434297	506	0.181194	0.0116462
2_14532938	AT2G34480	AT2G34480.2,AT2G34480.1	RPL18AB	-	T	C	0.00212816	27	1.15402	0.061742
2_14532944	AT2G34480	AT2G34480.2,AT2G34480.1	RPL18AB	-	T	C	0.0174993	234	0.294977	0.00101552
2_14532947	AT2G34480	AT2G34480.2,AT2G34480.1	RPL18AB	-	T	C	0.00700549	102	0.718663	0.000654241
2_14533041	AT2G34480	AT2G34480.2,AT2G34480.1	RPL18AB	-	T	C	0.0042805	68	0.390473	0.0715539
2_14533197	AT2G34480	AT2G34480.2,AT2G34480.1	RPL18AB	-	T	C	0.00153539	40	1.2553	0.0903957
2_14568999	AT2G34590	AT2G34590.1	E1-BETA-2	-	T	C	0.0913043	189	0.548863	0.000108381
2_14581009	AT2G34630	AT2G34630.2,AT2G34630.1	SPS3	+	A	G	0.0239234	15	1.52073	0.0806891
2_14583496	AT2G34640	AT2G34640.1	PTAC12	-	T	C	0.25463	165	0.494164	0.00018955
2_14640443	AT2G34710	AT2G34710.1	ATHB-14	-	T	C	0.109434	29	0.629907	0.0215188
2_14661411	AT2G34750	AT2G34750.1	AT2G34750	-	T	C	0.0487445	33	1.05317	0.0972676
2_14709508	AT2G34860	AT2G34860.1,AT2G34860.2	EDA3	+	A	G	0.029052	133	0.87112	2.34777e-06
2_14709966	AT2G34860	AT2G34860.1,AT2G34860.2	EDA3	+	A	G	0.0712788	238	0.823529	1.287e-06
2_14709981	AT2G34860	AT2G34860.1,AT2G34860.2	EDA3	+	A	G	0.0354187	107	0.98278	9.92022e-05
2_14710020	AT2G34860	AT2G34860.1,AT2G34860.2	EDA3	+	A	G	0.0554871	90	1.15157	2.93823e-07
2_14710080	AT2G34860	AT2G34860.1,AT2G34860.2	EDA3	+	A	G	0.105063	83	0.82261	0.0219183
2_14891470	AT2G35370	AT2G35370.1	GDH1	+	A	G	0.010322	209	0.61402	0.00162652
2_14914868	AT2G35500	AT2G35500.1	SKL2	+	A	G	0.0294748	55	1.02209	0.000805477
2_15043402	AT2G35795	AT2G35795.1	TIM14-1	+	A	G	0.0617978	11	1.75091	0.0417929
2_15170885	AT2G36160	AT2G36160.1	RPS14A	+	A	G	0.00122629	17	1.71153	0.0316333
2_15170931	AT2G36160	AT2G36160.1	RPS14A	+	A	G	0.00396268	48	0.616197	2.70199e-05
2_15172393	AT2G36170	AT2G36170.1	RPL40B	+	A	G	0.00256755	21	2.5647	0.0445913
2_15172553	AT2G36170	AT2G36170.1	RPL40B	+	A	G	0.00783055	61	0.265047	0.0821159
2_15197577	AT2G36250	AT2G36250.1,AT2G36250.4	FTSZ2-1	-	T	C	0.0768386	70	0.4858	0.0293719
2_15198707	AT2G36250	AT2G36250.1,AT2G36250.4	FTSZ2-1	-	T	C	0.0164918	22	1.69757	0.0902802
2_15321036	AT2G36530	AT2G36530.1,AT2G36530.2	ENO2	-	T	C	0.00502901	39	1.19284	0.00400447
2_15321085	AT2G36530	AT2G36530.1,AT2G36530.2	ENO2	-	T	C	0.00368877	43	1.09603	0.00134104
2_15322966	AT2G36530	AT2G36530.1,AT2G36530.2	ENO2	-	T	C	0.00133699	19	1.53109	0.0244658
2_15350547	AT2G36620	AT2G36620.1	RPL24A	-	T	C	0.510355	2070	0.222594	2.63878e-06
2_15455246	AT2G36850	AT2G36850.1	CALS10	-	T	C	0.0444444	14	1.12335	0.00267588
2_15581502	AT2G37080	AT2G37080.1,AT2G37080.3	ICR2	-	T	C	0.483221	72	0.275433	0.0713845
2_15581551	AT2G37080	AT2G37080.1,AT2G37080.3	ICR2	-	T	C	0.25	50	1.07296	0.000565209
2_15634793	AT2G37220	AT2G37220.1	CP29B	-	T	C	0.00609537	68	0.667467	0.00193996
2_15634969	AT2G37220	AT2G37220.1	CP29B	-	T	C	0.0117174	233	0.0906201	0.0472454
2_15635024	AT2G37220	AT2G37220.1	CP29B	-	T	C	0.00239574	54	1.10527	0.00236068
2_15647923	AT2G37270	AT2G37270.1,AT2G37270.2	RPS5A	-	T	C	0.0214702	92	0.591168	0.00651629
2_15670415	AT2G37340	AT2G37340.1,AT2G37340.2,AT2G37340.3	RS2Z33	-	T	C	0.0390903	55	0.272074	0.0472148
2_15670444	AT2G37340	AT2G37340.1,AT2G37340.2,AT2G37340.3	RS2Z33	-	T	C	0.0103964	16	1.01287	0.0700706
2_15670512	AT2G37340	AT2G37340.1,AT2G37340.2,AT2G37340.3	RS2Z33	-	T	C	0.357943	543	0.254599	0.00812809
2_15670558	AT2G37340	AT2G37340.1,AT2G37340.2,AT2G37340.3	RS2Z33	-	T	C	0.350993	689	0.183419	0.0307582
2_15670623	AT2G37340	AT2G37340.1,AT2G37340.2,AT2G37340.3	RS2Z33	-	T	C	0.32919	821	0.185726	0.0925604
2_15670858	AT2G37340	AT2G37340.1,AT2G37340.2,AT2G37340.3	RS2Z33	-	T	C	0.0220357	63	0.832301	0.0104204
2_15671098	AT2G37340	AT2G37340.1,AT2G37340.2,AT2G37340.3	RS2Z33	-	T	C	0.103754	199	0.221826	0.0996581
2_15739945	AT2G37500	AT2G37500.1,AT2G37500.2	AT2G37500	-	T	C	0.0442478	30	1.22702	0.0124329
2_15740640	AT2G37500	AT2G37500.1,AT2G37500.2	AT2G37500	-	T	C	0.128121	195	0.601438	2.1097e-05
2_15795495	AT2G37660	AT2G37660.1	AT2G37660	-	T	C	0.00288087	17	1.06954	0.0112268
2_15795785	AT2G37660	AT2G37660.1	AT2G37660	-	T	C	0.00743384	100	0.646387	4.04427e-06
2_15809775	AT2G37690	AT2G37690.1	AT2G37690	+	A	G	0.212389	72	0.624657	0.0105442
2_15857471	AT2G37860	AT2G37860.3,AT2G37860.1	LCD1	+	A	G	0.0931507	170	0.33487	0.0204127
2_15858738	AT2G37860	AT2G37860.3,AT2G37860.1	LCD1	+	A	G	0.0510783	45	0.485628	0.0300446
2_15915126	AT2G38025	AT2G38025.1,AT2G38025.2	AT2G38025	-	T	C	0.0265487	12	1.94684	0.00718013
2_15981338	AT2G38140	AT2G38140.1	RPS31	+	A	G	0.0132049	222	0.573641	0.00283725
2_16033752	AT2G38280	AT2G38280.1,AT2G38280.2	AMPD	-	T	C	0.0290557	12	1.75365	0.080299
2_16128772	AT2G38530	AT2G38530.1	LTP2	+	A	G	0.0455674	477	0.465133	7.84169e-05
2_16169151	AT2G38670	AT2G38670.1	PECT1	+	A	G	0.0222222	32	1.25619	0.00330804
2_16355391	AT2G39190	AT2G39190.2,AT2G39190.1	ATATH8	+	A	G	0.147625	115	1.30601	9.93702e-08
2_16355542	AT2G39190	AT2G39190.2,AT2G39190.1	ATATH8	+	A	G	0.06	39	1.49714	0.000431697
2_16355546	AT2G39190	AT2G39190.2,AT2G39190.1	ATATH8	+	A	G	0.110236	70	1.15724	2.05517e-05
2_16355549	AT2G39190	AT2G39190.2,AT2G39190.1	ATATH8	+	A	G	0.0341113	19	1.76117	0.0207494
2_16355614	AT2G39190	AT2G39190.2,AT2G39190.1	ATATH8	+	A	G	0.0361635	23	1.68342	0.019923
2_16451050	AT2G39390	AT2G39390.1	RPL35B	-	T	C	0.0398874	510	0.42912	1.22109e-05
2_16451527	AT2G39390	AT2G39390.1	RPL35B	-	T	C	0.00123566	21	1.19466	0.0271305
2_16475973	AT2G39460	AT2G39460.1,AT2G39460.2	RPL23AA	+	A	G	0.0184094	75	0.562531	0.0228235
2_16535712	AT2G39670	AT2G39670.1,AT2G39670.2	AT2G39670	+	A	G	0.014978	34	0.425341	0.0226108
2_16570958	AT2G39730	AT2G39730.1,AT2G39730.2,AT2G39730.3	RCA	-	T	C	0.000557693	20	2.33513	0.00729497
2_16572376	AT2G39730	AT2G39730.1,AT2G39730.2,AT2G39730.3	RCA	-	T	C	0.00593594	230	0.888045	1.31032e-07
2_16572534	AT2G39730	AT2G39730.1,AT2G39730.2,AT2G39730.3	RCA	-	T	C	0.00504927	206	0.449905	2.48778e-06
2_16592559	AT2G39780	AT2G39780.1	RNS2	+	A	G	0.0638953	83	0.28821	0.0255541
2_16709107	AT2G40010	AT2G40010.1	RPP0A	-	T	C	0.198171	130	1.33244	5.0335e-08
2_16709116	AT2G40010	AT2G40010.1	RPP0A	-	T	C	0.0675676	45	0.970696	0.0591983
2_16709117	AT2G40010	AT2G40010.1	RPP0A	-	T	C	0.0889894	59	1.37575	0.000731452
2_16710040	AT2G40010	AT2G40010.1	RPP0A	-	T	C	0.416051	394	0.502554	1.41815e-05
2_16710232	AT2G40010	AT2G40010.1	RPP0A	-	T	C	0.406746	410	0.412341	2.68897e-05
2_16919669	AT2G40510	AT2G40510.1	RPS26B	+	A	G	0.0178153	38	0.812939	0.00660736
2_17376282	AT2G41680	AT2G41680.1	NTRC	-	T	C	0.0202775	19	2.69086	0.0179107
2_17376811	AT2G41680	AT2G41680.1	NTRC	-	T	C	0.295613	721	0.0506572	0.0815882
2_17460028	AT2G41840	AT2G41840.1	RPS2C	-	T	C	0.00356013	36	1.41114	0.00101552
2_17460122	AT2G41840	AT2G41840.1	RPS2C	-	T	C	0.0407222	733	0.370645	1.18412e-12
2_17460773	AT2G41840	AT2G41840.1	RPS2C	-	T	C	0.00144246	31	1.28701	0.06726
2_17460782	AT2G41840	AT2G41840.1	RPS2C	-	T	C	0.00639432	126	0.357843	0.00771382
2_17460795	AT2G41840	AT2G41840.1	RPS2C	-	T	C	0.0109385	207	0.471483	1.34773e-05
2_17460819	AT2G41840	AT2G41840.1	RPS2C	-	T	C	0.0246342	426	0.496249	2.47797e-11
2_17461076	AT2G41840	AT2G41840.1	RPS2C	-	T	C	0.0045685	91	0.648108	0.00247104
2_17591619	AT2G42210	AT2G42210.2,AT2G42210.1	OEP163	+	A	G	0.0926047	283	0.159002	0.0811502
2_17698341	AT2G42500	AT2G42500.1,AT2G42500.2	PP2A4	-	T	C	0.0222222	25	1.32341	0.0497463
2_17858336	AT2G42910	AT2G42910.1	PRS4	+	A	G	0.00868193	11	1.11823	0.0975022
2_17895107	AT2G43030	AT2G43030.1	RPL3A	+	A	G	0.0252827	398	0.516596	7.92088e-06
2_17895790	AT2G43030	AT2G43030.1	RPL3A	+	A	G	0.0245179	89	0.589329	0.0100391
2_18046112	AT2G43460	AT2G43460.1	RPL38B	-	T	C	0.0170492	26	1.33406	0.00473723
2_18046124	AT2G43460	AT2G43460.1	RPL38B	-	T	C	0.0229153	36	1.99559	0.000306325
2_18046125	AT2G43460	AT2G43460.1	RPL38B	-	T	C	0.0136392	22	2.09084	0.00820524
2_18046262	AT2G43460	AT2G43460.1	RPL38B	-	T	C	0.000862813	11	1.14422	0.0667563
2_18046273	AT2G43460	AT2G43460.1	RPL38B	-	T	C	0.0236418	292	0.201925	0.000391591
2_18046284	AT2G43460	AT2G43460.1	RPL38B	-	T	C	0.0421119	599	0.18603	0.000854611
2_18046773	AT2G43460	AT2G43460.1	RPL38B	-	T	C	0.00739049	123	0.438034	0.0113134
2_18046779	AT2G43460	AT2G43460.1	RPL38B	-	T	C	0.0562685	969	0.229999	0.000441697
2_18046858	AT2G43460	AT2G43460.1	RPL38B	-	T	C	0.0345309	692	0.144765	0.00642235
2_18074094	AT2G43560	AT2G43560.1,AT2G43560.2	FKBP16-3	-	T	C	0.0314895	189	0.883497	2.95429e-07
2_18097348	AT2G43630	AT2G43630.1	AT2G43630	+	A	G	0.122083	68	0.284908	0.0834888
2_18129634	AT2G43750	AT2G43750.1,AT2G43750.2	OASB	-	T	C	0.0428571	114	0.335654	0.0147299
2_18129656	AT2G43750	AT2G43750.1,AT2G43750.2	OASB	-	T	C	0.0166449	51	0.649273	0.0048715
2_18139584	AT2G43790	AT2G43790.1	MPK6	+	A	G	0.134615	63	0.869662	0.00666885
2_18205758	AT2G43970	AT2G43970.1,AT2G43970.2	LARP6B	-	T	C	0.00612691	14	1.40429	0.0692508
2_18221933	AT2G44040	AT2G44040.1	DAPB1	-	T	C	0.0251366	23	0.588758	0.0837262
2_18243800	AT2G44100	AT2G44100.1,AT2G44100.2	GDI1	+	A	G	0.0203511	80	0.658498	0.000655706
2_18244409	AT2G44100	AT2G44100.1,AT2G44100.2	GDI1	+	A	G	0.0199917	48	0.744239	0.0444393
2_18244694	AT2G44100	AT2G44100.1,AT2G44100.2	GDI1	+	A	G	0.0513213	134	0.442378	0.0891269
2_18249222	AT2G44120	AT2G44120.2,AT2G44120.1	RPL7C	-	T	C	0.114836	531	0.432919	1.73335e-13
2_18249505	AT2G44120	AT2G44120.2,AT2G44120.1	RPL7C	-	T	C	0.0193628	141	0.277352	0.0234752
2_18250299	AT2G44120	AT2G44120.2,AT2G44120.1	RPL7C	-	T	C	0.00282156	29	1.10548	0.086864
2_18420144	AT2G44650	AT2G44650.1	CHL-CPN10	-	T	C	0.0895168	1093	0.327288	9.99999e-10
2_18420168	AT2G44650	AT2G44650.1	CHL-CPN10	-	T	C	0.0037194	43	0.690597	0.00945971
2_18799824	AT2G45640	AT2G45640.1,AT2G45640.2	SAP18	-	T	C	0.125	79	0.179503	0.0854311
2_18827161	AT2G45700	AT2G45700.1,AT2G45700.2	AT2G45700	-	T	C	0.105263	16	2.40868	0.0794845
2_18911043	AT2G45960	AT2G45960.1,AT2G45960.3,AT2G45960.2	PIP1-2	+	A	G	0.00778968	256	0.289191	0.000323493
2_18984378	AT2G46230	AT2G46230.1,AT2G46230.2	AT2G46230	-	T	C	0.0574506	32	1.3091	0.0683705
2_19003657	AT2G46280	AT2G46280.1,AT2G46280.3	TIF3I1	-	T	C	0.0258386	57	0.922852	0.000365259
2_19003663	AT2G46280	AT2G46280.1,AT2G46280.3	TIF3I1	-	T	C	0.169985	350	0.133045	0.0967111
2_19004021	AT2G46280	AT2G46280.1,AT2G46280.3	TIF3I1	-	T	C	0.00503235	14	1.47471	0.053234
2_19004408	AT2G46280	AT2G46280.1,AT2G46280.3	TIF3I1	-	T	C	0.053605	171	0.654123	2.32225e-06
2_19055635	AT2G46420	AT2G46420.1,AT2G46420.2	AT2G46420	+	A	G	0.151515	50	1.4604	0.00278279
2_19090033	AT2G46505	AT2G46505.1	SDH4	-	T	C	0.260417	400	0.440639	6.02879e-08
2_19273946	AT2G46910	AT2G46910.1	PAP10	+	A	G	0.085	17	1.50805	0.0176448
2_19339774	AT2G47070	AT2G47070.1,AT2G47070.2	SPL1	+	A	G	0.0272374	21	1.14028	0.0409894
2_19441829	AT2G47380	AT2G47380.1,AT2G47380.2	AT2G47380	+	A	G	0.0046902	19	0.618628	0.045134
2_19530873	AT2G47610	AT2G47610.1	RPL7AA	+	A	G	0.0340869	288	0.333107	1.8276e-06
2_19531124	AT2G47610	AT2G47610.1	RPL7AA	+	A	G	0.00950968	114	-0.0389773	0.0942498
2_19531465	AT2G47610	AT2G47610.1	RPL7AA	+	A	G	0.0248776	127	0.336306	0.0132648
2_19552013	AT2G47690	AT2G47690.1,AT2G47690.2,AT2G47690.3	AT2G47690	+	A	G	0.00960784	49	0.466762	0.0160944
2_19552022	AT2G47690	AT2G47690.1,AT2G47690.2,AT2G47690.3	AT2G47690	+	A	G	0.118127	550	0.446025	7.36755e-12
2_19555019	AT2G47710	AT2G47710.1	AT2G47710	-	T	C	0.0805322	115	0.658038	3.68483e-05
2_19646995	AT2G48020	AT2G48020.1,AT2G48020.4,AT2G48020.3	AT2G48020	+	A	G	0.171958	130	0.70151	0.00401138
3_39252	AT3G01120	AT3G01120.1	CGS1	-	T	C	0.0907133	379	0.454648	7.15802e-10
3_39338	AT3G01120	AT3G01120.1	CGS1	-	T	C	0.0302899	140	0.493493	0.00775996
3_39345	AT3G01120	AT3G01120.1	CGS1	-	T	C	0.0348478	158	0.421161	0.0103588
3_189046	AT3G01480	AT3G01480.1,AT3G01480.2	CYP38	+	A	G	0.0198956	61	0.905068	0.0145557
3_367295	AT3G02090	AT3G02090.1,AT3G02090.2	MPPBETA	+	A	G	0.0629195	150	1.17818	4.50518e-13
3_367365	AT3G02090	AT3G02090.1,AT3G02090.2	MPPBETA	+	A	G	0.0406716	109	1.24974	1.41637e-08
3_368538	AT3G02090	AT3G02090.1,AT3G02090.2	MPPBETA	+	A	G	0.0504935	133	0.76093	2.47003e-05
3_368539	AT3G02090	AT3G02090.1,AT3G02090.2	MPPBETA	+	A	G	0.011655	30	0.689104	0.0303367
3_368540	AT3G02090	AT3G02090.1,AT3G02090.2	MPPBETA	+	A	G	0.0176664	43	1.19226	0.0177726
3_368566	AT3G02090	AT3G02090.1,AT3G02090.2	MPPBETA	+	A	G	0.00690846	16	2.1695	0.025607
3_368581	AT3G02090	AT3G02090.1,AT3G02090.2	MPPBETA	+	A	G	0.363398	830	0.468012	1.03415e-09
3_368619	AT3G02090	AT3G02090.1,AT3G02090.2	MPPBETA	+	A	G	0.0163399	30	1.24051	0.00996963
3_406669	AT3G02200	AT3G02200.2,AT3G02200.1	AT3G02200	+	A	G	0.0295082	18	2.29415	0.016016
3_543149	AT3G02560	AT3G02560.1,AT3G02560.2,AT3G02560.3	RPS7B	+	A	G	0.0570921	225	0.259057	0.00805865
3_588596	AT3G02730	AT3G02730.1	TRXF1	-	T	C	0.00958248	42	0.933848	0.00965855
3_597828	AT3G02760	AT3G02760.1,AT3G02760.2	AT3G02760	-	T	C	0.0370995	22	0.79573	0.0670639
3_602660	AT3G02780	AT3G02780.1,AT3G02780.2	IPP2	-	T	C	0.100644	250	0.245358	0.0142166
3_647377	AT3G02900	AT3G02900.1,AT3G02900.2	AT3G02900	+	A	G	0.0269931	43	0.846572	0.0813169
3_805339	AT3G03380	AT3G03380.1,AT3G03380.2	DEGP7	+	A	G	0.213483	76	0.524642	0.0663492
3_808342	AT3G03380	AT3G03380.1,AT3G03380.2	DEGP7	+	A	G	0.139466	47	1.04252	0.0566576
3_1009131	AT3G03920	AT3G03920.1	AT3G03920	-	T	C	0.0425124	111	0.427289	0.0227753
3_1009135	AT3G03920	AT3G03920.1	AT3G03920	-	T	C	0.0169679	46	0.562646	0.0558061
3_1009149	AT3G03920	AT3G03920.1	AT3G03920	-	T	C	0.0102276	31	1.08195	0.0391477
3_1009679	AT3G03920	AT3G03920.1	AT3G03920	-	T	C	0.164069	2053	0.376489	1.55518e-11
3_1009719	AT3G03920	AT3G03920.1	AT3G03920	-	T	C	0.00160823	20	1.91901	0.0670639
3_1009725	AT3G03920	AT3G03920.1	AT3G03920	-	T	C	0.0174382	223	0.308436	0.0135839
3_1027010	AT3G03960	AT3G03960.1	CCT8	+	A	G	0.0540728	156	0.216687	0.00230403
3_1082997	AT3G04120	AT3G04120.1	GAPC1	+	A	G	0.0103257	149	0.347069	0.00310171
3_1083160	AT3G04120	AT3G04120.1	GAPC1	+	A	G	0.034851	297	0.163315	0.00754791
3_1167714	AT3G04400	AT3G04400.1,AT3G04400.2	RPL23C	+	A	G	0.0101755	258	-0.00593707	0.0920306
3_1168285	AT3G04400	AT3G04400.1,AT3G04400.2	RPL23C	+	A	G	0.0170648	309	-0.010076	0.019608
3_1245542	AT3G04600	AT3G04600.1,AT3G04600.2	AT3G04600	+	A	G	0.0223256	24	0.747562	0.00421112
3_1245775	AT3G04600	AT3G04600.1,AT3G04600.2	AT3G04600	+	A	G	0.199164	143	0.686148	0.000343875
3_1252387	AT3G04610	AT3G04610.1,AT3G04610.3	FLK	-	T	C	0.118506	73	0.862419	0.00247104
3_1331087	AT3G04840	AT3G04840.1	RPS3AA	+	A	G	0.0110441	163	0.328895	0.02337
3_1331102	AT3G04840	AT3G04840.1	RPS3AA	+	A	G	0.00433651	65	0.489776	0.0280134
3_1331103	AT3G04840	AT3G04840.1	RPS3AA	+	A	G	0.0135466	205	0.561692	1.8195e-05
3_1331157	AT3G04840	AT3G04840.1	RPS3AA	+	A	G	0.00516668	73	0.542627	0.00530557
3_1331183	AT3G04840	AT3G04840.1	RPS3AA	+	A	G	0.0842076	1204	0.31496	1.18178e-08
3_1362145	AT3G04920	AT3G04920.1,AT3G04920.2	RPS24A	+	A	G	0.0667749	329	0.741675	4.18753e-10
3_1362228	AT3G04920	AT3G04920.1,AT3G04920.2	RPS24A	+	A	G	0.124402	260	0.722121	7.85097e-13
3_1527067	AT3G05350	AT3G05350.1	AT3G05350	-	T	C	0.465438	101	0.919178	0.000226546
3_1527409	AT3G05350	AT3G05350.1	AT3G05350	-	T	C	0.087013	67	0.97745	0.00283725
3_1529243	AT3G05350	AT3G05350.1	AT3G05350	-	T	C	0.148649	88	0.790416	0.000593806
3_1604304	AT3G05530	AT3G05530.1	RPT5A	+	A	G	0.144522	248	0.340077	0.0545016
3_1605341	AT3G05530	AT3G05530.1	RPT5A	+	A	G	0.00561207	16	1.23498	0.0400912
3_1605358	AT3G05530	AT3G05530.1	RPT5A	+	A	G	0.0562357	147	0.419465	0.0312845
3_1605685	AT3G05530	AT3G05530.1	RPT5A	+	A	G	0.044279	113	0.396987	0.0916513
3_1605777	AT3G05530	AT3G05530.1	RPT5A	+	A	G	0.0318352	68	0.743218	0.00210113
3_1606094	AT3G05530	AT3G05530.1	RPT5A	+	A	G	0.123288	18	1.19619	0.0504834
3_1621826	AT3G05590	AT3G05590.1,AT3G05590.2	RPL18B	+	A	G	0.0341472	551	0.324504	4.96929e-05
3_1621873	AT3G05590	AT3G05590.1,AT3G05590.2	RPL18B	+	A	G	0.153237	3737	0.354603	6.0974e-10
3_1621879	AT3G05590	AT3G05590.1,AT3G05590.2	RPL18B	+	A	G	0.00259633	63	0.63228	0.0537226
3_1621880	AT3G05590	AT3G05590.1,AT3G05590.2	RPL18B	+	A	G	0.00828477	209	0.521896	3.89371e-06
3_1622021	AT3G05590	AT3G05590.1,AT3G05590.2	RPL18B	+	A	G	0.00949703	277	0.453971	1.11522e-06
3_1622027	AT3G05590	AT3G05590.1,AT3G05590.2	RPL18B	+	A	G	0.0026232	75	0.562679	0.0902181
3_1622049	AT3G05590	AT3G05590.1,AT3G05590.2	RPL18B	+	A	G	0.0248659	672	0.256656	7.00149e-05
3_1622092	AT3G05590	AT3G05590.1,AT3G05590.2	RPL18B	+	A	G	0.00242688	58	0.622825	0.00509069
3_1622415	AT3G05590	AT3G05590.1,AT3G05590.2	RPL18B	+	A	G	0.00608935	104	0.762084	0.000150485
3_1622446	AT3G05590	AT3G05590.1,AT3G05590.2	RPL18B	+	A	G	0.00211446	30	1.19751	0.0115916
3_1622626	AT3G05590	AT3G05590.1,AT3G05590.2	RPL18B	+	A	G	0.0229372	380	0.171659	0.00149049
3_1622699	AT3G05590	AT3G05590.1,AT3G05590.2	RPL18B	+	A	G	0.0402349	603	0.299824	5.68496e-08
3_1622726	AT3G05590	AT3G05590.1,AT3G05590.2	RPL18B	+	A	G	0.00889665	107	0.715768	7.01523e-05
3_14200076	AT3G06355	AT3G06355.1	NA	+	A	G	0.0358362	53	-1.84244	1.57268e-08
3_2117593	AT3G06700	AT3G06700.1,AT3G06700.2,AT3G06700.3	RPL29A	-	T	C	0.00291044	44	0.669877	0.0667061
3_2123707	AT3G06720	AT3G06720.1,AT3G06720.2	IMPA1	+	A	G	0.309791	193	0.251985	0.00344103
3_2185333	AT3G06930	AT3G06930.1,AT3G06930.2	PRMT13	-	T	C	0.0759494	18	2.5964	0.0174197
3_2252180	AT3G07110	AT3G07110.1,AT3G07110.2	RPL13AA	+	A	G	0.00173427	18	1.46533	0.0759377
3_2252685	AT3G07110	AT3G07110.1,AT3G07110.2	RPL13AA	+	A	G	0.034623	298	0.0462465	0.0951813
3_2411444	AT3G07560	AT3G07560.1	PEX13	-	T	C	0.075431	35	0.266737	0.0712867
3_2411600	AT3G07560	AT3G07560.1	PEX13	-	T	C	0.0729395	100	0.198551	0.0871208
3_2416466	AT3G07568	AT3G07568.1	AT3G07568	-	T	C	0.244224	444	0.425549	1.06286e-07
3_2515364	AT3G07880	AT3G07880.1	GDI1	+	A	G	0.010211	15	1.08839	0.0220111
3_2587532	AT3G08530	AT3G08530.1	CHC2	-	T	C	0.010425	13	1.04666	0.0502968
3_2605803	AT3G08580	AT3G08580.1,AT3G08580.2	AAC1	-	T	C	0.0961052	950	0.419181	2.18873e-15
3_2605884	AT3G08580	AT3G08580.1,AT3G08580.2	AAC1	-	T	C	0.00108144	13	1.44813	0.0508231
3_2605915	AT3G08580	AT3G08580.1,AT3G08580.2	AAC1	-	T	C	0.00186703	23	1.59903	0.0827801
3_2606269	AT3G08580	AT3G08580.1,AT3G08580.2	AAC1	-	T	C	0.0115101	100	0.393404	0.0325737
3_2615631	AT3G08610	AT3G08610.1	AT3G08610	-	T	C	0.00634249	24	2.72288	0.00041166
3_2615634	AT3G08610	AT3G08610.1	AT3G08610	-	T	C	0.0148967	62	0.289586	0.00941906
3_2615637	AT3G08610	AT3G08610.1	AT3G08610	-	T	C	0.326432	1419	0.274519	1.88605e-08
3_2615640	AT3G08610	AT3G08610.1	AT3G08610	-	T	C	0.099754	446	0.386629	3.76747e-08
3_2615653	AT3G08610	AT3G08610.1	AT3G08610	-	T	C	0.0253293	125	0.300274	0.022278
3_2615654	AT3G08610	AT3G08610.1	AT3G08610	-	T	C	0.0192308	94	0.457762	0.00125253
3_2615680	AT3G08610	AT3G08610.1	AT3G08610	-	T	C	0.00293103	17	1.90879	0.0395168
3_2616426	AT3G08610	AT3G08610.1	AT3G08610	-	T	C	0.0142583	104	0.820587	7.10426e-08
3_2616482	AT3G08610	AT3G08610.1	AT3G08610	-	T	C	0.00744681	56	0.747945	0.00724121
3_2616488	AT3G08610	AT3G08610.1	AT3G08610	-	T	C	0.189158	1497	0.348338	3.98874e-13
3_2616521	AT3G08610	AT3G08610.1	AT3G08610	-	T	C	0.00151005	13	0.759725	0.0532568
3_2616668	AT3G08610	AT3G08610.1	AT3G08610	-	T	C	0.0253834	192	0.499881	1.89316e-07
3_2654721	AT3G08740	AT3G08740.1	AT3G08740	-	T	C	0.04649	100	0.46894	0.00177875
3_2654847	AT3G08740	AT3G08740.1	AT3G08740	-	T	C	0.11522	592	0.509915	2.03388e-05
3_2654886	AT3G08740	AT3G08740.1	AT3G08740	-	T	C	0.00472028	27	1.41062	0.0021311
3_2823365	AT3G09200	AT3G09200.1,AT3G09200.2	RPP0B	-	T	C	0.060816	474	0.444031	2.72135e-12
3_2823406	AT3G09200	AT3G09200.1,AT3G09200.2	RPP0B	-	T	C	0.0102703	106	0.892154	3.07602e-06
3_2823422	AT3G09200	AT3G09200.1,AT3G09200.2	RPP0B	-	T	C	0.00133976	15	1.56462	0.0673936
3_2823428	AT3G09200	AT3G09200.1,AT3G09200.2	RPP0B	-	T	C	0.00410213	49	1.00541	0.00657961
3_2823430	AT3G09200	AT3G09200.1,AT3G09200.2	RPP0B	-	T	C	0.016693	190	0.180613	0.0218995
3_2823434	AT3G09200	AT3G09200.1,AT3G09200.2	RPP0B	-	T	C	0.0115299	134	0.46556	9.79874e-05
3_2823481	AT3G09200	AT3G09200.1,AT3G09200.2	RPP0B	-	T	C	0.0372107	492	0.180197	0.000323493
3_2823792	AT3G09200	AT3G09200.1,AT3G09200.2	RPP0B	-	T	C	0.0120933	168	0.271917	0.00033723
3_2823808	AT3G09200	AT3G09200.1,AT3G09200.2	RPP0B	-	T	C	0.0050698	69	0.353853	0.0386479
3_2823881	AT3G09200	AT3G09200.1,AT3G09200.2	RPP0B	-	T	C	0.0220971	263	0.59321	6.14898e-11
3_2823886	AT3G09200	AT3G09200.1,AT3G09200.2	RPP0B	-	T	C	0.0148593	178	0.484216	1.10933e-05
3_2823922	AT3G09200	AT3G09200.1,AT3G09200.2	RPP0B	-	T	C	0.00365149	43	1.43209	2.85813e-06
3_2823952	AT3G09200	AT3G09200.1,AT3G09200.2	RPP0B	-	T	C	0.00733059	82	0.656135	6.07478e-05
3_2823974	AT3G09200	AT3G09200.1,AT3G09200.2	RPP0B	-	T	C	0.0189001	255	0.229697	0.00589709
3_2823986	AT3G09200	AT3G09200.1,AT3G09200.2	RPP0B	-	T	C	0.00667971	99	0.472136	0.0397493
3_2824628	AT3G09200	AT3G09200.1,AT3G09200.2	RPP0B	-	T	C	0.0149245	250	0.537869	0.000255235
3_2824798	AT3G09200	AT3G09200.1,AT3G09200.2	RPP0B	-	T	C	0.00442504	74	0.391054	0.00953351
3_2824887	AT3G09200	AT3G09200.1	RPP0B	-	T	C	0.00215703	30	0.754058	0.0508231
3_2824896	AT3G09200	AT3G09200.1	RPP0B	-	T	C	0.00160572	22	1.13001	0.0143725
3_2824978	AT3G09200	AT3G09200.1,AT3G09200.2	RPP0B	-	T	C	0.0180617	205	0.488761	1.61963e-05
3_2824992	AT3G09200	AT3G09200.1,AT3G09200.2	RPP0B	-	T	C	0.029945	294	0.439485	1.16929e-06
3_2824995	AT3G09200	AT3G09200.1,AT3G09200.2	RPP0B	-	T	C	0.030129	278	0.347733	0.000538671
3_2841496	AT3G09260	AT3G09260.1	BGLU23	-	T	C	0.0118438	162	0.781185	1.11787e-05
3_2917665	AT3G09500	AT3G09500.1	RPL35A	+	A	G	0.00087108	20	0.695385	0.0721885
3_2917835	AT3G09500	AT3G09500.1	RPL35A	+	A	G	0.0369541	528	0.27933	5.74209e-07
3_2917846	AT3G09500	AT3G09500.1	RPL35A	+	A	G	0.0289499	330	0.145995	2.41722e-06
3_3022415	AT3G09840	AT3G09840.1	CDC48A	+	A	G	0.0477918	224	0.812165	6.93538e-07
3_3022639	AT3G09840	AT3G09840.1	CDC48A	+	A	G	0.0148883	72	1.29124	2.44308e-05
3_3201612	AT3G10330	AT3G10330.1	TFIIB2	+	A	G	0.0718954	22	1.02264	0.083344
3_3321356	AT3G10620	AT3G10620.1	NUDT26	+	A	G	0.122845	114	0.591213	0.0183035
3_3321513	AT3G10620	AT3G10620.1	NUDT26	+	A	G	0.112792	82	0.479223	0.0797798
3_3335269	AT3G10670	AT3G10670.1	ABCI6	-	T	C	0.168646	142	0.305942	0.0161977
3_3335303	AT3G10670	AT3G10670.1	ABCI6	-	T	C	0.157143	154	0.624397	3.53075e-05
3_3335304	AT3G10670	AT3G10670.1	ABCI6	-	T	C	0.0240385	25	0.873802	0.011111
3_3399912	AT3G10860	AT3G10860.1,AT3G10860.2	AT3G10860	+	A	G	0.00664407	98	0.414472	0.00402607
3_3399924	AT3G10860	AT3G10860.1,AT3G10860.2	AT3G10860	+	A	G	0.0323957	501	0.271238	0.0102066
3_3400483	AT3G10860	AT3G10860.1,AT3G10860.2	AT3G10860	+	A	G	0.0352054	420	0.351987	4.60464e-05
3_3400492	AT3G10860	AT3G10860.1,AT3G10860.2	AT3G10860	+	A	G	0.00747454	80	0.391506	0.0233884
3_3400495	AT3G10860	AT3G10860.1,AT3G10860.2	AT3G10860	+	A	G	0.02473	261	0.428734	3.97072e-06
3_3400504	AT3G10860	AT3G10860.1,AT3G10860.2	AT3G10860	+	A	G	0.0126952	126	0.49901	0.00010672
3_3400526	AT3G10860	AT3G10860.1,AT3G10860.2	AT3G10860	+	A	G	0.0102355	83	0.647576	6.78938e-05
3_3400560	AT3G10860	AT3G10860.1,AT3G10860.2	AT3G10860	+	A	G	0.0349731	182	0.3223	0.000922962
3_3400581	AT3G10860	AT3G10860.1,AT3G10860.2	AT3G10860	+	A	G	0.0108519	40	1.15251	0.0108289
3_3482494	AT3G11130	AT3G11130.1	CHC1	-	T	C	0.0212766	23	1.0652	0.0664631
3_3482529	AT3G11130	AT3G11130.1	CHC1	-	T	C	0.0152466	17	0.599036	0.0104359
3_3482934	AT3G11130	AT3G11130.1	CHC1	-	T	C	0.25931	376	0.488841	1.02642e-08
3_3483123	AT3G11130	AT3G11130.1	CHC1	-	T	C	0.0832306	135	0.57503	0.00593256
3_3522838	AT3G11250	AT3G11250.1	RPP0C	+	A	G	0.0413136	39	1.02056	0.00189916
3_3623728	AT3G11510	AT3G11510.1	RPS14B	-	T	C	0.00371402	28	0.774731	0.0996951
3_3623991	AT3G11510	AT3G11510.1	RPS14B	-	T	C	0.0210016	286	0.124364	0.0075437
3_3624175	AT3G11510	AT3G11510.1	RPS14B	-	T	C	0.00323341	48	0.215991	0.0811042
3_3624202	AT3G11510	AT3G11510.1	RPS14B	-	T	C	0.143678	1901	0.154236	0.000192584
3_3673928	AT3G11630	AT3G11630.1	BAS1	+	A	G	0.00867334	71	0.790277	0.000230076
3_3673932	AT3G11630	AT3G11630.1	BAS1	+	A	G	0.00731954	58	0.56748	0.0548381
3_3673945	AT3G11630	AT3G11630.1	BAS1	+	A	G	0.190495	1443	0.409319	2.30436e-14
3_3673957	AT3G11630	AT3G11630.1	BAS1	+	A	G	0.0420455	296	0.577119	4.83404e-09
3_3673958	AT3G11630	AT3G11630.1	BAS1	+	A	G	0.0151694	103	0.422577	0.0741301
3_3673959	AT3G11630	AT3G11630.1	BAS1	+	A	G	0.0978022	623	0.3946	5.13408e-05
3_3673986	AT3G11630	AT3G11630.1	BAS1	+	A	G	0.123276	706	0.506674	2.1166e-10
3_3703005	AT3G11710	AT3G11710.1	ATKRS-1	-	T	C	0.0194986	35	1.01172	0.0491688
3_3735533	AT3G11830	AT3G11830.1,AT3G11830.2	CCT7	+	A	G	0.0230886	61	0.224384	0.0145869
3_3778188	AT3G11940	AT3G11940.1,AT3G11940.2	RPS5B	-	T	C	0.0509952	351	0.100038	0.0447891
3_3778467	AT3G11940	AT3G11940.1,AT3G11940.2	RPS5B	-	T	C	0.0127577	190	0.274043	0.000120322
3_3862897	AT3G12120	AT3G12120.1	FAD2	-	T	C	0.00524068	54	0.792435	0.0700542
3_3909175	AT3G12260	AT3G12260.1	AT3G12260	-	T	C	0.0174157	31	1.31262	0.00882461
3_3909177	AT3G12260	AT3G12260.1	AT3G12260	-	T	C	0.10066	183	0.630445	8.35943e-05
3_3920269	AT3G12290	AT3G12290.1	FOLD2	+	A	G	0.0314685	108	0.306566	0.0587786
3_3943654	AT3G12390	AT3G12390.1	AT3G12390	+	A	G	0.0334029	32	0.902245	0.062783
3_4063470	AT3G12800	AT3G12800.1	SDRB	-	T	C	0.0383352	35	1.36109	0.000843857
3_4063567	AT3G12800	AT3G12800.1	SDRB	-	T	C	0.0384377	62	0.781744	0.0837999
3_4137015	AT3G12965	AT3G12965.1	AT3G12965	-	T	C	0.122951	105	1.01758	5.0472e-07
3_4219938	AT3G13120	AT3G13120.1,AT3G13120.2	RPS10	-	T	C	0.0196767	28	0.694306	0.0889424
3_4220051	AT3G13120	AT3G13120.1,AT3G13120.2,AT3G13120.3	RPS10	-	T	C	0.00687517	51	1.55191	0.00235709
3_4264531	AT3G13226	AT3G13226.1	AT3G13226	-	T	C	0.159817	35	1.48722	0.00246122
3_4362214	AT3G13410	AT3G13410.1	AT3G13410	-	T	C	0.0612245	135	0.599232	0.000493274
3_4392253	AT3G13470	AT3G13470.1	CPN60B2	+	A	G	0.00657	29	1.14264	0.000731083
3_4392446	AT3G13470	AT3G13470.1	CPN60B2	+	A	G	0.0413969	211	0.520856	1.28967e-06
3_4396847	AT3G13490	AT3G13490.1	OVA5	-	T	C	0.130811	121	0.341427	0.00284952
3_4397337	AT3G13490	AT3G13490.1	OVA5	-	T	C	0.028451	27	1.84439	0.0420536
3_4425469	AT3G13560	AT3G13560.1,AT3G13560.2,AT3G13560.3,AT3G13560.4,AT3G13560.5	AT3G13560	-	T	C	0.107011	29	1.5996	0.062196
3_4433972	AT3G13580	AT3G13580.1,AT3G13580.2,AT3G13580.3,AT3G13580.4,AT3G13580.5,AT3G13580.6,AT3G13580.7,AT3G13580.8,AT3G13580.9	RPL7D	+	A	G	0.0142156	55	0.286212	0.0915691
3_4473424	AT3G13670	AT3G13670.1	AT3G13670	+	A	G	0.0943396	20	1.49082	0.0433455
3_4515793	AT3G13750	AT3G13750.1	BGAL1	+	A	G	0.0755988	101	0.507979	0.00669561
3_4562160	AT3G13860	AT3G13860.1	HSP60-3A	-	T	C	0.181944	131	0.382257	0.00634338
3_4592551	AT3G13920	AT3G13920.5,AT3G13920.1,AT3G13920.3,AT3G13920.2	TIF4A-1	-	T	C	0.0868204	610	0.137365	0.0228492
3_4592570	AT3G13920	AT3G13920.5,AT3G13920.1,AT3G13920.3,AT3G13920.2	TIF4A-1	-	T	C	0.0150602	105	0.554845	0.0311409
3_4593557	AT3G13920	AT3G13920.5,AT3G13920.1,AT3G13920.3,AT3G13920.4,AT3G13920.2	TIF4A-1	-	T	C	0.0238169	153	0.599458	9.37928e-06
3_4596234	AT3G13930	AT3G13930.1	AT3G13930	+	A	G	0.0421585	50	0.549051	0.0129348
3_4677168	AT3G14110	AT3G14110.1,AT3G14110.2,AT3G14110.3	FLU	-	T	C	0.0142805	78	0.521033	0.0419976
3_4684531	AT3G14120	AT3G14120.2,AT3G14120.3,AT3G14120.1	NUP107	+	A	G	0.0859729	19	0.5177	0.0968605
3_4684739	AT3G14120	AT3G14120.2,AT3G14120.3,AT3G14120.1	NUP107	+	A	G	0.157088	41	1.12079	0.000406418
3_4684766	AT3G14120	AT3G14120.2,AT3G14120.3,AT3G14120.1	NUP107	+	A	G	0.320144	89	0.420026	0.00819909
3_4730782	AT3G14210	AT3G14210.1,AT3G14210.2	ESM1	+	A	G	0.833333	11	-1.25084	0.0324818
3_4818799	AT3G14415	AT3G14415.1,AT3G14415.2	GLO2	+	A	G	0.00795675	78	1.24267	7.30072e-05
3_4820776	AT3G14415	AT3G14415.1,AT3G14415.2	GLO2	+	A	G	0.060219	297	0.403403	0.000390514
3_4820890	AT3G14415	AT3G14415.1,AT3G14415.2	GLO2	+	A	G	0.0379973	85	1.51372	1.2372e-06
3_4823850	AT3G14420	AT3G14420.1,AT3G14420.6,AT3G14420.3,AT3G14420.5,AT3G14420.4	GLO1	+	A	G	0.00117195	25	0.800068	0.0417471
3_5051732	AT3G15000	AT3G15000.1	MORF8	+	A	G	0.0348883	89	0.458146	0.00632135
3_5052205	AT3G15000	AT3G15000.1	MORF8	+	A	G	0.00877621	18	0.813856	0.0714346
3_5117364	AT3G15190	AT3G15190.1	RPS20	+	A	G	0.00328508	32	1.28213	0.0101505
3_5117426	AT3G15190	AT3G15190.1	RPS20	+	A	G	0.00539921	33	0.488448	0.00337571
3_5117448	AT3G15190	AT3G15190.1	RPS20	+	A	G	0.091958	534	0.211762	0.0134523
3_5117459	AT3G15190	AT3G15190.1	RPS20	+	A	G	0.0626244	346	0.316573	0.000809466
3_5117464	AT3G15190	AT3G15190.1	RPS20	+	A	G	0.0305315	166	0.312279	0.00754115
3_5117571	AT3G15190	AT3G15190.1	RPS20	+	A	G	0.036488	32	0.970163	0.0697726
3_5189250	AT3G15360	AT3G15360.1	ATHM4	+	A	G	0.095941	1404	0.32052	4.716e-10
3_5189456	AT3G15360	AT3G15360.1	ATHM4	+	A	G	0.0552682	203	0.41338	9.15139e-05
3_5189460	AT3G15360	AT3G15360.1	ATHM4	+	A	G	0.0330943	120	0.648581	0.0103588
3_5249997	AT3G15520	AT3G15520.1,AT3G15520.2	CYP37	-	T	C	0.198925	296	0.737092	6.49835e-12
3_5250102	AT3G15520	AT3G15520.1,AT3G15520.2	CYP37	-	T	C	0.0228614	31	0.773023	0.0962587
3_5250106	AT3G15520	AT3G15520.1,AT3G15520.2	CYP37	-	T	C	0.065799	91	0.614147	0.00248653
3_5250108	AT3G15520	AT3G15520.1,AT3G15520.2	CYP37	-	T	C	0.0113475	16	1.0755	0.00377217
3_5291063	AT3G15610	AT3G15610.1	AT3G15610	-	T	C	0.0849315	31	0.731974	0.0981194
3_5299685	AT3G15640	AT3G15640.1,AT3G15640.2	COX5B-1	+	A	G	0.170213	224	0.404678	0.00126678
3_5330881	AT3G15730	AT3G15730.1	PLDALPHA1	+	A	G	0.00810742	32	1.26634	0.0186171
3_5506685	AT3G16240	AT3G16240.1	TIP2-1	+	A	G	0.00747884	76	0.763702	0.0016461
3_5669687	AT3G16640	AT3G16640.1	TCTP	-	T	C	0.0635274	1654	0.258658	2.50199e-08
3_5669702	AT3G16640	AT3G16640.1	TCTP	-	T	C	0.0125203	324	0.648774	2.21018e-06
3_5669957	AT3G16640	AT3G16640.1	TCTP	-	T	C	0.00211802	65	1.21599	0.00384198
3_5669988	AT3G16640	AT3G16640.1	TCTP	-	T	C	0.0024285	85	1.01566	0.000170774
3_5670073	AT3G16640	AT3G16640.1	TCTP	-	T	C	0.0013268	52	1.19834	0.00293778
3_5670119	AT3G16640	AT3G16640.1	TCTP	-	T	C	0.00415082	179	0.41435	0.000119143
3_5670200	AT3G16640	AT3G16640.1	TCTP	-	T	C	0.130268	4695	0.166083	7.19653e-05
3_5670308	AT3G16640	AT3G16640.1	TCTP	-	T	C	0.0141364	506	0.183008	0.0175811
3_5706406	AT3G16770	AT3G16770.1	RAP2-3	+	A	G	0.0145131	31	0.665958	0.0585354
3_5786674	AT3G16950	AT3G16950.2,AT3G16950.1	LPD1	-	T	C	0.130246	90	0.205377	0.0745413
3_6186194	AT3G18060	AT3G18060.1	AT3G18060	+	A	G	0.0294118	19	1.77285	0.00674533
3_6214103	AT3G18140	AT3G18140.1,AT3G18140.2	AT3G18140	-	T	C	0.0531178	46	1.23185	0.00945971
3_6239264	AT3G18210	AT3G18210.1,AT3G18210.2	AT3G18210	-	T	C	0.121475	56	1.56813	0.000280455
3_6324404	AT3G18410	AT3G18410.1	AT3G18410	+	A	G	0.105634	285	0.29598	2.06309e-05
3_6324489	AT3G18410	AT3G18410.1	AT3G18410	+	A	G	0.0138889	18	1.73456	0.0411778
3_6453848	AT3G18740	AT3G18740.1	RPL30C	+	A	G	0.0355954	246	0.569776	1.27896e-06
3_6485809	AT3G18820	AT3G18820.1	RABG3F	+	A	G	0.0202068	43	1.68328	0.035696
3_6865959	AT3G19760	AT3G19760.1	RH2	+	A	G	0.0123294	28	0.873865	0.0277657
3_6879859	AT3G19820	AT3G19820.1,AT3G19820.2,AT3G19820.3	DIM	-	T	C	0.0159544	84	0.784165	0.000145925
3_6880528	AT3G19820	AT3G19820.1,AT3G19820.2,AT3G19820.3	DIM	-	T	C	0.0476576	353	0.590417	1.56963e-12
3_6929294	AT3G19910	AT3G19910.1	BBR	+	A	G	0.151242	67	0.58909	0.0865911
3_6956088	AT3G19960	AT3G19960.1,AT3G19960.3,AT3G19960.2	VIII-1	+	A	G	0.0757576	20	1.93249	0.0978578
3_6998432	AT3G20050	AT3G20050.1	CCT1	-	T	C	0.0643034	78	0.477682	0.00822212
3_7055611	AT3G20230	AT3G20230.1	AT3G20230	-	T	C	0.0418632	71	0.0266897	0.076119
3_7404140	AT3G21110	AT3G21110.1,AT3G21110.2,AT3G21110.3	PUR7	-	T	C	0.141593	80	0.460866	0.0137195
3_7404359	AT3G21110	AT3G21110.1,AT3G21110.2,AT3G21110.3	PUR7	-	T	C	0.0509259	22	1.68799	0.0984017
3_7493594	AT3G21300	AT3G21300.1	AT3G21300	-	T	C	0.249351	96	0.523672	0.0457648
3_8088450	AT3G22845	AT3G22845.1,AT3G22845.2	AT3G22845	+	A	G	0.0258472	45	0.358973	0.0475915
3_8088560	AT3G22845	AT3G22845.1,AT3G22845.2	AT3G22845	+	A	G	0.0880435	81	0.973488	1.89509e-05
3_8114776	AT3G22890	AT3G22890.1	APS1	+	A	G	0.00328084	15	2.49215	0.0139416
3_8424317	AT3G23490	AT3G23490.1,AT3G23490.3	CYN	-	T	C	0.00899195	19	1.648	0.0282472
3_8474534	AT3G23600	AT3G23600.1,AT3G23600.2	AT3G23600	+	A	G	0.00391007	24	2.60439	3.20296e-05
3_8475061	AT3G23600	AT3G23600.1,AT3G23600.2	AT3G23600	+	A	G	0.00947522	52	1.303	0.000114021
3_8475521	AT3G23600	AT3G23600.1,AT3G23600.2	AT3G23600	+	A	G	0.0317318	142	0.59992	3.9326e-05
3_8475570	AT3G23600	AT3G23600.1,AT3G23600.2	AT3G23600	+	A	G	0.00433526	15	2.42506	0.0118089
3_8475664	AT3G23600	AT3G23600.1,AT3G23600.2	AT3G23600	+	A	G	0.0323139	56	0.629288	0.0120588
3_8475668	AT3G23600	AT3G23600.1,AT3G23600.2	AT3G23600	+	A	G	0.0361446	60	0.993957	0.000545461
3_8475775	AT3G23600	AT3G23600.1,AT3G23600.2	AT3G23600	+	A	G	0.195231	131	0.920181	1.00148e-08
3_8589609	AT3G23810	AT3G23810.1	SAHH2	-	T	C	0.00914448	45	1.06083	0.0250279
3_8729682	AT3G24170	AT3G24170.1,AT3G24170.2,AT3G24170.3	ATGR1	-	T	C	0.0643382	35	1.75108	1.08723e-06
3_8729706	AT3G24170	AT3G24170.1,AT3G24170.2,AT3G24170.3	ATGR1	-	T	C	0.0441826	30	1.54238	0.000719397
3_8729954	AT3G24170	AT3G24170.1,AT3G24170.2,AT3G24170.3	ATGR1	-	T	C	0.0151057	20	1.35456	0.00268195
3_8868782	AT3G24430	AT3G24430.1	HCF101	-	T	C	0.0285714	38	1.51274	0.0270314
3_9065867	AT3G24830	AT3G24830.1	RPL13AB	+	A	G	0.00619811	53	0.192255	0.0659855
3_9150528	AT3G25120	AT3G25120.1	AT3G25120	-	T	C	0.145263	138	0.700294	1.0325e-05
3_9191186	AT3G25230	AT3G25230.1,AT3G25230.2	FKBP62	+	A	G	0.0760234	39	1.45011	0.0147299
3_9235313	AT3G25480	AT3G25480.1	STR4A	-	T	C	0.0425532	14	1.28475	0.0920485
3_9235424	AT3G25480	AT3G25480.1	STR4A	-	T	C	0.126244	203	0.669042	1.18455e-07
3_9235643	AT3G25480	AT3G25480.1	STR4A	-	T	C	0.016403	28	0.704961	0.00851352
3_9269517	AT3G25520	AT3G25520.1,AT3G25520.2	ATL5	-	T	C	0.00678253	32	1.01053	0.0977966
3_9269944	AT3G25520	AT3G25520.1,AT3G25520.2	ATL5	-	T	C	0.00700426	74	0.351492	0.000365263
3_9270271	AT3G25520	AT3G25520.1,AT3G25520.2	ATL5	-	T	C	0.0101485	110	0.458464	0.0154441
3_9270627	AT3G25520	AT3G25520.1,AT3G25520.3	ATL5	-	T	C	0.355907	3805	0.320747	4.87034e-14
3_9339655	AT3G25660	AT3G25660.1	GATA	-	T	C	0.0217096	16	1.82479	0.0310999
3_9339882	AT3G25660	AT3G25660.1	GATA	-	T	C	0.0422849	57	0.848518	0.054376
3_9340041	AT3G25660	AT3G25660.1	GATA	-	T	C	0.023569	35	1.04419	0.0994137
3_9340836	AT3G25660	AT3G25660.1	GATA	-	T	C	0.027898	58	0.864575	0.00661736
3_9423215	AT3G25800	AT3G25800.1,AT3G25800.2	PP2AA2	-	T	C	0.0644028	55	0.705018	0.0248274
3_9423298	AT3G25800	AT3G25800.1,AT3G25800.2	PP2AA2	-	T	C	0.0458716	30	0.988745	0.0133167
3_9423301	AT3G25800	AT3G25800.1,AT3G25800.2	PP2AA2	-	T	C	0.0359375	23	1.78248	0.00672497
3_9491242	AT3G25920	AT3G25920.1	RPL15	-	T	C	0.0276116	180	0.620509	4.95566e-05
3_9491301	AT3G25920	AT3G25920.1	RPL15	-	T	C	0.122803	1020	0.51031	1.17021e-10
3_9491332	AT3G25920	AT3G25920.1	RPL15	-	T	C	0.248554	2536	0.45436	1.94956e-23
3_9491473	AT3G25920	AT3G25920.1	RPL15	-	T	C	0.0271947	469	0.438276	0.0218799
3_9492260	AT3G25920	AT3G25920.1	RPL15	-	T	C	0.0436131	830	0.423414	1.49854e-12
3_9672981	AT3G26420	AT3G26420.1	RZ1A	+	A	G	0.0342886	134	0.184747	0.00239101
3_9814431	AT3G26710	AT3G26710.1	CCB1	+	A	G	0.0269027	76	0.782537	0.0222506
3_9991443	AT3G27090	AT3G27090.1,AT3G27090.2,AT3G27090.3	AT3G27090	+	A	G	0.0114629	21	1.41349	0.0369471
3_9991576	AT3G27090	AT3G27090.1,AT3G27090.2,AT3G27090.3	AT3G27090	+	A	G	0.0958036	121	0.529962	6.00616e-05
3_10056052	AT3G27240	AT3G27240.1	CYC11	-	T	C	0.11588	81	0.280527	0.00690053
3_10078313	AT3G27280	AT3G27280.1,AT3G27280.2	PHB4	+	A	G	0.0704225	70	0.490647	0.00678059
3_10122685	AT3G27340	AT3G27340.1,AT3G27340.4,AT3G27340.2,AT3G27340.3	AT3G27340	+	A	G	0.0895522	48	0.97418	0.00416171
3_10154258	AT3G27430	AT3G27430.2,AT3G27430.3,AT3G27430.1	PBB1	+	A	G	0.235192	540	0.293062	3.88827e-05
3_10154987	AT3G27430	AT3G27430.2,AT3G27430.3,AT3G27430.1	PBB1	+	A	G	0.0130077	49	0.544402	0.00463431
3_10281688	AT3G27740	AT3G27740.1,AT3G27740.2	CARA	-	T	C	0.0910881	185	0.241086	0.00584857
3_10282511	AT3G27740	AT3G27740.1,AT3G27740.2	CARA	-	T	C	0.0166309	31	1.23497	0.0911754
3_10672356	AT3G28460	AT3G28460.1,AT3G28460.2,AT3G28460.3	AT3G28460	-	T	C	0.132641	115	0.21271	0.0569951
3_10682562	AT3G28500	AT3G28500.1	RPP2C	+	A	G	0.32967	30	0.863179	0.0209216
3_10774011	AT3G28710	AT3G28710.1	VHA-D1	-	T	C	0.0195574	38	1.52779	3.58905e-05
3_10904438	AT3G28900	AT3G28900.1	RPL34C	-	T	C	0.107527	20	0.84632	0.0464814
3_14195933	AT3G41761	AT3G41761.1	AT3G41761	+	A	G	0.646465	25	-1.15199	0.0127366
3_14197251	AT3G41762	AT3G41762.1	AT3G41762	-	T	C	0.448359	1106	-0.953934	1.03736e-17
3_14228553	AT3G42050	AT3G42050.1	VHA-H	-	T	C	0.0825243	17	1.23623	0.09154
3_14228650	AT3G42050	AT3G42050.1	VHA-H	-	T	C	0.156297	103	0.966124	0.000261712
3_14228651	AT3G42050	AT3G42050.1	VHA-H	-	T	C	0.0596125	40	1.25916	0.0315336
3_14229228	AT3G42050	AT3G42050.1	VHA-H	-	T	C	0.00620262	18	2.81561	0.000598273
3_14229915	AT3G42050	AT3G42050.1	VHA-H	-	T	C	0.0156006	40	1.18962	0.0280134
3_14229940	AT3G42050	AT3G42050.1	VHA-H	-	T	C	0.00696203	22	1.62776	0.0247634
3_14231873	AT3G42050	AT3G42050.1	VHA-H	-	T	C	0.0318443	72	1.194	0.000323493
3_15407295	AT3G43520	AT3G43520.1	FAX2	+	A	G	0.0483401	166	0.33516	0.000277852
3_15664537	AT3G43810	AT3G43810.1,AT3G43810.3	CAM7	-	T	C	0.0139944	35	1.31138	0.00304434
3_15800028	AT3G44010	AT3G44010.1,AT3G44010.2	RPS29A	-	T	C	0.0190418	31	1.19428	0.0777609
3_15800146	AT3G44010	AT3G44010.1,AT3G44010.2	RPS29A	-	T	C	0.0965217	999	0.327791	7.45045e-08
3_15801133	AT3G44010	AT3G44010.1,AT3G44010.2	RPS29A	-	T	C	0.00166113	13	1.35347	0.0283214
3_15869182	AT3G44110	AT3G44110.1,AT3G44110.2	ATJ3	-	T	C	0.0153352	43	1.12414	0.00232861
3_16195405	AT3G44620	AT3G44620.1,AT3G44620.2	AT3G44620	+	A	G	0.0639405	86	0.589255	0.011639
3_16195430	AT3G44620	AT3G44620.1,AT3G44620.2	AT3G44620	+	A	G	0.0557904	66	0.593199	0.0248397
3_16387314	AT3G44890	AT3G44890.1	RPL9	+	A	G	0.00239274	29	1.13459	0.0899192
3_16387910	AT3G44890	AT3G44890.1	RPL9	+	A	G	0.0148343	180	0.920657	3.53211e-09
3_16388296	AT3G44890	AT3G44890.1	RPL9	+	A	G	0.0620196	234	1.00321	1.64255e-12
3_16471988	AT3G45030	AT3G45030.1	RPS20A	-	T	C	0.0112239	105	0.239766	0.0712143
3_16472003	AT3G45030	AT3G45030.1	RPS20A	-	T	C	0.0184439	174	0.416139	4.54751e-05
3_16472215	AT3G45030	AT3G45030.1	RPS20A	-	T	C	0.00164458	17	1.68707	0.0225368
3_16477094	AT3G45050	AT3G45050.2,AT3G45050.1	AT3G45050	+	A	G	0.188434	290	0.906745	7.36755e-12
3_16477128	AT3G45050	AT3G45050.2,AT3G45050.1	AT3G45050	+	A	G	0.0387442	58	1.20855	6.17266e-05
3_16477255	AT3G45050	AT3G45050.1,AT3G45050.3	AT3G45050	+	A	G	0.102757	41	2.40808	9.96045e-05
3_16477332	AT3G45050	AT3G45050.2,AT3G45050.1	AT3G45050	+	A	G	0.0730838	41	0.911672	0.0342438
3_16628986	AT3G45310	AT3G45310.1,AT3G45310.2	AT3G45310	-	T	C	0.0152091	12	1.21163	0.028336
3_16909561	AT3G46010	AT3G46010.1,AT3G46010.2	ADF1	-	T	C	0.10055	128	0.834318	3.58781e-06
3_16928450	AT3G46100	AT3G46100.1	ATHRS1	-	T	C	0.538126	247	0.478455	2.8057e-06
3_17088000	AT3G46430	AT3G46430.1	AT3G46430	+	A	G	0.152459	593	-0.0652193	0.00215114
3_17139352	AT3G46560	AT3G46560.1	TIM9	+	A	G	0.0137741	25	0.935998	0.0513002
3_17229091	AT3G46780	AT3G46780.1	PTAC16	+	A	G	0.00273632	33	1.37385	0.00541897
3_17230970	AT3G46780	AT3G46780.1	PTAC16	+	A	G	0.0229885	172	0.785173	0.000132642
3_17246758	AT3G46830	AT3G46830.1,AT3G46830.2	RABA2C	-	T	C	0.0694935	59	0.959469	0.00920215
3_17423423	AT3G47290	AT3G47290.1	PLC8	+	A	G	0.0994624	37	1.18935	0.0520812
3_17423444	AT3G47290	AT3G47290.1	PLC8	+	A	G	0.106628	37	0.571719	0.0558061
3_17463467	AT3G47390	AT3G47390.2,AT3G47390.1	PYRR	+	A	G	0.115242	31	1.33609	0.0361564
3_17494251	AT3G47470	AT3G47470.1	LHCA4	-	T	C	0.00154693	111	1.14941	1.22109e-05
3_17569741	AT3G47650	AT3G47650.1	AT3G47650	+	A	G	0.0211511	208	0.530441	0.0600456
3_17570267	AT3G47650	AT3G47650.1	AT3G47650	+	A	G	0.0167579	153	0.655973	0.000140504
3_17570300	AT3G47650	AT3G47650.1	AT3G47650	+	A	G	0.0164731	122	0.587222	0.00107754
3_17570334	AT3G47650	AT3G47650.1	AT3G47650	+	A	G	0.310328	1929	0.249844	4.4902e-06
3_17570360	AT3G47650	AT3G47650.1	AT3G47650	+	A	G	0.00489339	28	0.823194	0.0207399
3_17570472	AT3G47650	AT3G47650.1	AT3G47650	+	A	G	0.0643127	102	0.405205	0.0135097
3_17637343	AT3G47810	AT3G47810.1,AT3G47810.2,AT3G47810.3	VPS29	-	T	C	0.164634	216	0.30418	0.0706716
3_17637399	AT3G47810	AT3G47810.1,AT3G47810.2,AT3G47810.3	VPS29	-	T	C	0.106546	153	0.270191	0.0960803
3_17638926	AT3G47810	AT3G47810.1,AT3G47810.2,AT3G47810.3	VPS29	-	T	C	0.12574	340	0.361237	0.000311243
3_17649814	AT3G47833	AT3G47833.1	SDH7A	+	A	G	0.0236382	23	0.74038	0.0600456
3_17650479	AT3G47836	AT3G47836.1,AT3G47836.2	AT3G47836	-	T	C	0.0613853	148	0.358268	0.00365722
3_17779444	AT3G48140	AT3G48140.1	T24C20_20	+	A	G	0.026486	86	0.645418	0.000176372
3_17851494	AT3G48210	AT3G48210.1	AT3G48210	+	A	G	0.152778	22	1.24732	0.00516588
3_18050647	AT3G48730	AT3G48730.1	GSA2	+	A	G	0.129746	639	0.0399861	0.0119875
3_18141017	AT3G48930	AT3G48930.1	RPS11A	-	T	C	0.019287	132	0.459928	0.00159408
3_18166833	AT3G49010	AT3G49010.1,AT3G49010.4,AT3G49010.5	RPL13B	-	T	C	0.0189394	25	1.07519	0.0282908
3_18166870	AT3G49010	AT3G49010.1,AT3G49010.4,AT3G49010.5	RPL13B	-	T	C	0.00963763	25	1.55686	0.0706755
3_18166950	AT3G49010	AT3G49010.1,AT3G49010.4,AT3G49010.5	RPL13B	-	T	C	0.00345888	18	1.84873	0.0510524
3_18167057	AT3G49010	AT3G49010.1,AT3G49010.4,AT3G49010.5	RPL13B	-	T	C	0.0189637	269	0.436183	1.54712e-07
3_18167137	AT3G49010	AT3G49010.1,AT3G49010.4,AT3G49010.5	RPL13B	-	T	C	0.0014064	27	0.907147	0.080008
3_18314841	AT3G49390	AT3G49390.1,AT3G49390.2,AT3G49390.3	CID10	-	T	C	0.0572034	27	0.764561	0.0292484
3_18334313	AT3G49430	AT3G49430.1,AT3G49430.2	SR34A	+	A	G	0.0132924	26	0.797612	0.0536759
3_18334337	AT3G49430	AT3G49430.1,AT3G49430.2	SR34A	+	A	G	0.316547	792	0.410571	1.62628e-16
3_18334483	AT3G49430	AT3G49430.1,AT3G49430.2	SR34A	+	A	G	0.0416667	107	1.17199	6.16553e-06
3_18334501	AT3G49430	AT3G49430.1,AT3G49430.2	SR34A	+	A	G	0.147298	398	0.522893	2.06555e-10
3_18334857	AT3G49430	AT3G49430.1,AT3G49430.2	SR34A	+	A	G	0.0899316	92	1.09839	1.30068e-05
3_18334861	AT3G49430	AT3G49430.1,AT3G49430.2	SR34A	+	A	G	0.0344828	35	1.55519	0.00717564
3_18425586	AT3G49680	AT3G49680.1,AT3G49680.2	BCAT3	+	A	G	0.0993377	60	0.608972	0.00669627
3_18504754	AT3G49910	AT3G49910.1	RPL26A	+	A	G	0.0320415	272	0.0541497	0.00985181
3_18504794	AT3G49910	AT3G49910.1	RPL26A	+	A	G	0.0120744	100	0.22904	0.0889424
3_18504800	AT3G49910	AT3G49910.1	RPL26A	+	A	G	0.0160597	127	0.267416	0.0764661
3_18881371	AT3G50790	AT3G50790.1,AT3G50790.2	AT3G50790	-	T	C	0.134021	65	0.872339	0.0177733
3_19216185	AT3G51820	AT3G51820.1	CHLG	-	T	C	0.0364204	35	0.761706	0.0320546
3_19225512	AT3G51840	AT3G51840.1	ACX4	-	T	C	0.256997	101	0.718016	0.00173788
3_19318034	AT3G52090	AT3G52090.1,AT3G52090.2	NRPB11	-	T	C	0.140905	165	0.284553	0.00504017
3_19342353	AT3G52150	AT3G52150.1,AT3G52150.2	AT3G52150	+	A	G	0.00183739	24	1.08949	0.0903272
3_19398115	AT3G52300	AT3G52300.1,AT3G52300.2	ATPQ	+	A	G	0.0195453	98	0.704343	0.000420114
3_19398150	AT3G52300	AT3G52300.1,AT3G52300.2	ATPQ	+	A	G	0.0375767	147	0.309289	0.00186579
3_19422819	AT3G52380	AT3G52380.1	CP33	+	A	G	0.0300058	156	0.619641	6.07511e-05
3_19504321	AT3G52580	AT3G52580.1	RPS14C	+	A	G	0.0859317	463	0.429268	2.24166e-05
3_19504428	AT3G52580	AT3G52580.1	RPS14C	+	A	G	0.00592644	34	1.73587	0.0180774
3_19504792	AT3G52580	AT3G52580.1	RPS14C	+	A	G	0.165331	227	0.875488	1.81652e-09
3_19506102	AT3G52590	AT3G52590.1	RPL40B	+	A	G	0.0155752	435	0.337423	4.59529e-05
3_19506517	AT3G52590	AT3G52590.1	RPL40B	+	A	G	0.008361	204	0.314061	0.00377971
3_19506553	AT3G52590	AT3G52590.1	RPL40B	+	A	G	0.0216955	422	0.24909	0.000721412
3_19506682	AT3G52590	AT3G52590.1	RPL40B	+	A	G	0.00704048	84	0.693423	0.000734186
3_19506684	AT3G52590	AT3G52590.1	RPL40B	+	A	G	0.366848	4309	0.318745	6.82373e-07
3_19506699	AT3G52590	AT3G52590.1	RPL40B	+	A	G	0.103741	1015	0.393676	3.15902e-11
3_19601546	AT3G52880	AT3G52880.1,AT3G52880.2	ATMDAR1	-	T	C	0.0108221	57	0.834482	9.75562e-05
3_19627227	AT3G52930	AT3G52930.1	AT3G52930	-	T	C	0.225087	323	0.36492	4.52789e-06
3_19627637	AT3G52930	AT3G52930.1	AT3G52930	-	T	C	0.0179073	153	0.160391	0.0209916
3_19660699	AT3G53020	AT3G53020.1	RPL24B	-	T	C	0.0261278	139	0.482489	0.000414641
3_19660777	AT3G53020	AT3G53020.1	RPL24B	-	T	C	0.145718	1157	0.335996	1.61111e-17
3_19660786	AT3G53020	AT3G53020.1	RPL24B	-	T	C	0.0224288	193	0.552772	9.2e-06
3_19660830	AT3G53020	AT3G53020.1	RPL24B	-	T	C	0.00679072	77	0.223496	0.0871208
3_19690435	AT3G53110	AT3G53110.1	RH38	+	A	G	0.117717	99	0.28023	0.00219385
3_19810264	AT3G53430	AT3G53430.1	RPL12B	-	T	C	0.0212172	342	0.21647	0.00309829
3_19819709	AT3G53460	AT3G53460.1,AT3G53460.4	CP29A	-	T	C	0.0139928	215	0.505521	0.00279205
3_19819710	AT3G53460	AT3G53460.1,AT3G53460.4	CP29A	-	T	C	0.00286247	43	0.645324	0.0245929
3_19820874	AT3G53460	AT3G53460.1,AT3G53460.4	CP29A	-	T	C	0.00268139	34	0.9647	0.00033046
3_19834824	AT3G53500	AT3G53500.2,AT3G53500.1	RS2Z32	-	T	C	0.029393	138	0.224748	0.0771069
3_19866858	AT3G53580	AT3G53580.1	DAPF	+	A	G	0.0692501	193	0.441599	0.000244457
3_19866972	AT3G53580	AT3G53580.1	DAPF	+	A	G	0.015939	23	1.14039	0.0485482
3_19885652	AT3G53630	AT3G53630.1,AT3G53630.2	AT3G53630	+	A	G	0.0222469	20	2.18059	0.0279089
3_19885653	AT3G53630	AT3G53630.1,AT3G53630.2	AT3G53630	+	A	G	0.0170455	15	12.5501	0.0094203
3_19885701	AT3G53630	AT3G53630.1,AT3G53630.2	AT3G53630	+	A	G	0.0485437	30	0.638013	0.0556841
3_19892092	AT3G53670	AT3G53670.1,AT3G53670.2	AT3G53670	+	A	G	0.062069	27	1.19214	0.086864
3_19914240	AT3G53740	AT3G53740.2,AT3G53740.1	RPL36B	-	T	C	0.000952765	26	1.63761	0.00248653
3_19952703	AT3G53870	AT3G53870.1	RPS3B	+	A	G	0.0251361	254	0.469106	2.07794e-05
3_19952731	AT3G53870	AT3G53870.1	RPS3B	+	A	G	0.00245365	18	0.776699	0.0490541
3_19952733	AT3G53870	AT3G53870.1	RPS3B	+	A	G	0.00720621	52	1.05321	0.00059165
3_19955597	AT3G53890	AT3G53890.1,AT3G53890.2	RPS21B	-	T	C	0.00575629	65	0.0411273	0.0977673
3_19955856	AT3G53890	AT3G53890.1,AT3G53890.2	RPS21B	-	T	C	0.00885971	161	-0.0153807	0.00479458
3_20067704	AT3G54210	AT3G54210.1	RPL17	-	T	C	0.0144361	85	0.309257	0.0107053
3_20067763	AT3G54210	AT3G54210.1	RPL17	-	T	C	0.00216853	21	1.64154	0.057023
3_20128554	AT3G54360	AT3G54360.1,AT3G54360.2	AT3G54360	-	T	C	0.0618067	78	0.50026	0.0491355
3_20197544	AT3G54560	AT3G54560.1,AT3G54560.2	H2AV	+	A	G	0.0528224	102	0.964092	3.71272e-05
3_20230590	AT3G54660	AT3G54660.1	EMB2360	-	T	C	0.0715922	125	0.354361	0.000172009
3_20232868	AT3G54660	AT3G54660.1	EMB2360	-	T	C	0.0119177	22	1.31904	0.0601679
3_20303746	AT3G54820	AT3G54820.1	PIP2-5	+	A	G	0.0909091	68	0.79655	0.0176956
3_20340202	AT3G54890	AT3G54890.1,AT3G54890.4,AT3G54890.2,AT3G54890.3	LHCA1	-	T	C	0.00129399	101	0.606665	0.017842
3_20340925	AT3G54890	AT3G54890.1,AT3G54890.4,AT3G54890.2,AT3G54890.3	LHCA1	-	T	C	0.00672763	245	0.497938	0.0175144
3_20453094	AT3G55170	AT3G55170.1,AT3G55170.3	RPL35C	-	T	C	0.153695	156	0.330667	0.00316188
3_20453185	AT3G55170	AT3G55170.1,AT3G55170.3	RPL35C	-	T	C	0.0103194	21	2.0189	0.0033144
3_20501362	AT3G55280	AT3G55280.1,AT3G55280.3	RPL23AB	+	A	G	0.0399869	122	0.323493	0.0219872
3_20514072	AT3G55330	AT3G55330.1	PPL1	-	T	C	0.00533239	15	3.60254	0.0502968
3_20535821	AT3G55400	AT3G55400.1,AT3G55400.2	OVA1	-	T	C	0.270833	156	0.40846	0.00311185
3_20535888	AT3G55400	AT3G55400.1,AT3G55400.2	OVA1	-	T	C	0.216524	152	0.937646	1.58069e-07
3_20554547	AT3G55440	AT3G55440.1	CTIMC	+	A	G	0.0231539	338	0.169913	0.000545747
3_20556090	AT3G55440	AT3G55440.1	CTIMC	+	A	G	0.103562	756	0.176239	1.64382e-06
3_20556187	AT3G55440	AT3G55440.1	CTIMC	+	A	G	0.00935829	28	0.758569	0.0626997
3_20563063	AT3G55460	AT3G55460.1	SCL30	+	A	G	0.0211513	79	0.26119	0.0102435
3_20636147	AT3G55620	AT3G55620.1	EIF6-2	+	A	G	0.0244338	41	0.609428	0.0598504
3_20699374	AT3G55750	AT3G55750.1	RPL35AD	+	A	G	0.235871	2020	0.26933	3.13034e-09
3_20699518	AT3G55750	AT3G55750.1	RPL35AD	+	A	G	0.0672906	453	0.194153	0.000125359
3_20699520	AT3G55750	AT3G55750.1	RPL35AD	+	A	G	0.0340553	250	0.184201	6.12474e-05
3_20699542	AT3G55750	AT3G55750.1	RPL35AD	+	A	G	0.00390943	24	1.61106	0.012747
3_20700015	AT3G55750	AT3G55750.1	RPL35AD	+	A	G	0.17193	49	1.06754	0.0391554
3_20790848	AT3G56020	AT3G56020.1	RPL41E	-	T	C	0.0720622	528	0.181669	0.00143791
3_20790863	AT3G56020	AT3G56020.1	RPL41E	-	T	C	0.0138686	95	0.360047	0.018286
3_20790887	AT3G56020	AT3G56020.1	RPL41E	-	T	C	0.0133448	62	0.350571	0.0625746
3_20826164	AT3G56120	AT3G56120.1	AT3G56120	+	A	G	0.0595745	14	1.88599	0.0588423
3_20828834	AT3G56130	AT3G56130.1,AT3G56130.2,AT3G56130.5,AT3G56130.4,AT3G56130.3	AT3G56130	+	A	G	0.00762134	19	0.696245	0.0266511
3_20829045	AT3G56130	AT3G56130.1,AT3G56130.2,AT3G56130.5,AT3G56130.4,AT3G56130.3	AT3G56130	+	A	G	0.13948	177	0.821003	8.09249e-12
3_20829069	AT3G56130	AT3G56130.1,AT3G56130.2,AT3G56130.5,AT3G56130.4,AT3G56130.3	AT3G56130	+	A	G	0.0671551	55	0.880332	0.00375429
3_20834083	AT3G56150	AT3G56150.1,AT3G56150.2	TIF3C1	-	T	C	0.0116071	26	0.811362	0.0594389
3_20837715	AT3G56160	AT3G56160.3,AT3G56160.2,AT3G56160.4,AT3G56160.1,AT3G56160.5	BASS4	-	T	C	0.248082	194	0.599075	1.75868e-05
3_20846106	AT3G56190	AT3G56190.1,AT3G56190.2	ASNAP2	-	T	C	0.0693215	94	0.744253	0.00020644
3_20892297	AT3G56340	AT3G56340.1	RPS26C	-	T	C	0.00666397	33	1.15452	0.0219206
3_20992183	AT3G56680	AT3G56680.1	AT3G56680	+	A	G	0.0115607	14	1.05537	0.0679577
3_21034968	AT3G56800	AT3G56800.1	CAM2	-	T	C	0.0136836	50	0.463486	0.0434263
3_21034971	AT3G56800	AT3G56800.1	CAM2	-	T	C	0.0448958	168	0.562708	0.000158894
3_21070180	AT3G56900	AT3G56900.1	AAAS	+	A	G	0.000633387	16	2.65101	0.0930353
3_21069656	AT3G56910	AT3G56910.1	PSRP5	-	T	C	0.00104304	19	1.38479	0.0243077
3_21069871	AT3G56910	AT3G56910.1	PSRP5	-	T	C	0.00410587	112	0.763564	6.2455e-05
3_21196831	AT3G57290	AT3G57290.1	EIF3E	-	T	C	0.236533	685	0.369565	1.50074e-07
3_21196838	AT3G57290	AT3G57290.1	EIF3E	-	T	C	0.112083	346	0.353594	0.000371532
3_21196868	AT3G57290	AT3G57290.1	EIF3E	-	T	C	0.215181	584	0.355762	1.79746e-05
3_21635533	AT3G58500	AT3G58500.1	PP2A3	-	T	C	0.0733138	175	0.564935	2.79815e-07
3_21672824	AT3G58610	AT3G58610.1,AT3G58610.2,AT3G58610.3	AT3G58610	+	A	G	0.00302042	25	1.13038	0.0304475
3_21674446	AT3G58610	AT3G58610.1,AT3G58610.2,AT3G58610.3	AT3G58610	+	A	G	0.056441	641	0.241021	1.28044e-07
3_21674489	AT3G58610	AT3G58610.1,AT3G58610.2,AT3G58610.3	AT3G58610	+	A	G	0.00463376	52	0.563612	0.0682753
3_21718432	AT3G58730	AT3G58730.1	VHA-D	-	T	C	0.0219269	33	0.971418	0.0131142
3_21718517	AT3G58730	AT3G58730.1	VHA-D	-	T	C	0.127165	279	0.451086	9.18498e-08
3_21718840	AT3G58730	AT3G58730.1	VHA-D	-	T	C	0.061369	234	1.17716	1.98081e-18
3_21810827	AT3G59020	AT3G59020.2,AT3G59020.1	AT3G59020	-	T	C	0.0909091	31	1.92239	0.0036762
3_21995848	AT3G59540	AT3G59540.1	RPL38B	-	T	C	0.243993	1970	0.325467	5.69922e-12
3_21995863	AT3G59540	AT3G59540.1	RPL38B	-	T	C	0.378242	3456	0.404488	1.94956e-23
3_21995896	AT3G59540	AT3G59540.1	RPL38B	-	T	C	0.00994244	114	0.395148	0.00119264
3_21995906	AT3G59540	AT3G59540.1	RPL38B	-	T	C	0.0795972	909	0.40971	3.04606e-09
3_21995907	AT3G59540	AT3G59540.1	RPL38B	-	T	C	0.0026498	31	0.913812	0.0526918
3_21996225	AT3G59540	AT3G59540.1	RPL38B	-	T	C	0.00962632	110	0.507707	0.000568592
3_21996283	AT3G59540	AT3G59540.1	RPL38B	-	T	C	0.0131606	191	0.311034	0.00517487
3_21996302	AT3G59540	AT3G59540.1	RPL38B	-	T	C	0.001202	20	2.69177	0.0643051
3_22138007	AT3G59920	AT3G59920.1	GDI2	+	A	G	0.0056926	12	1.4603	0.0243926
3_22138039	AT3G59920	AT3G59920.1	GDI2	+	A	G	0.141764	278	0.467885	1.54739e-06
3_22138250	AT3G59920	AT3G59920.1	GDI2	+	A	G	0.0386163	48	0.923501	0.0741786
3_22154334	AT3G59970	AT3G59970.3,AT3G59970.2,AT3G59970.1	MTHFR1	+	A	G	0.0129342	35	1.20662	0.00783189
3_22246440	AT3G60190	AT3G60190.1	DRP1E	-	T	C	0.0304709	11	1.09175	0.0362685
3_22251333	AT3G60210	AT3G60210.1	AT3G60210	-	T	C	0.260606	215	0.128917	0.0264187
3_22269581	AT3G60245	AT3G60245.1	RPL37AC	+	A	G	0.00530042	131	0.205966	0.0291388
3_22269586	AT3G60245	AT3G60245.1	RPL37AC	+	A	G	0.0341972	801	0.493478	3.14111e-07
3_22269712	AT3G60245	AT3G60245.1	RPL37AC	+	A	G	0.000663189	15	2.31424	0.0247716
3_22315397	AT3G60370	AT3G60370.1,AT3G60370.2	FKBP20-2	-	T	C	0.0571597	97	0.930097	1.7885e-05
3_22400543	AT3G60600	AT3G60600.1,AT3G60600.3,AT3G60600.2	PVA11	+	A	G	0.0192572	56	0.555964	0.0177597
3_22460410	AT3G60770	AT3G60770.1	RPS13A	-	T	C	0.0139319	36	0.43144	0.0311409
3_22612550	AT3G61110	AT3G61110.1	RPS27B	+	A	G	0.0231004	318	0.22875	0.000200943
3_22669125	AT3G61240	AT3G61240.1,AT3G61240.2	RH12	+	A	G	0.0372751	29	1.20896	0.0793297
3_22746234	AT3G61470	AT3G61470.1	LHCA2	+	A	G	0.00115751	50	1.08991	0.0187879
3_22747042	AT3G61470	AT3G61470.1	LHCA2	+	A	G	0.014006	465	0.378712	1.71199e-07
3_22747044	AT3G61470	AT3G61470.1	LHCA2	+	A	G	0.00875274	272	0.524587	0.000113909
3_22747050	AT3G61470	AT3G61470.1	LHCA2	+	A	G	0.0113421	341	0.475226	2.55857e-06
3_22747090	AT3G61470	AT3G61470.1	LHCA2	+	A	G	0.00420122	76	1.02067	0.0010968
3_22747091	AT3G61470	AT3G61470.1	LHCA2	+	A	G	0.00499283	87	1.26466	1.77067e-07
3_22747126	AT3G61470	AT3G61470.1	LHCA2	+	A	G	0.104289	1488	0.467849	2.30436e-14
3_22973707	AT3G62030	AT3G62030.2,AT3G62030.3,AT3G62030.1	CYP20-3	+	A	G	0.0100385	133	0.277377	0.0775784
3_22973992	AT3G62030	AT3G62030.2,AT3G62030.3,AT3G62030.1	CYP20-3	+	A	G	0.00431806	111	0.386372	0.0715413
3_22974080	AT3G62030	AT3G62030.2,AT3G62030.3,AT3G62030.1	CYP20-3	+	A	G	0.00139519	32	1.17355	0.00368342
3_22974469	AT3G62030	AT3G62030.2,AT3G62030.3,AT3G62030.1	CYP20-3	+	A	G	0.00525401	124	0.699626	9.34489e-05
3_22974651	AT3G62030	AT3G62030.2,AT3G62030.3,AT3G62030.1	CYP20-3	+	A	G	0.00253184	66	0.906952	0.000186266
3_22974658	AT3G62030	AT3G62030.2,AT3G62030.3,AT3G62030.1	CYP20-3	+	A	G	0.00328363	85	0.867352	0.00411624
3_22974665	AT3G62030	AT3G62030.2,AT3G62030.3,AT3G62030.1	CYP20-3	+	A	G	0.00557906	149	0.569736	0.00401875
3_22974827	AT3G62030	AT3G62030.2,AT3G62030.3,AT3G62030.1	CYP20-3	+	A	G	0.0288207	555	0.606878	2.63596e-10
3_22974995	AT3G62030	AT3G62030.2,AT3G62030.3,AT3G62030.1	CYP20-3	+	A	G	0.00752775	158	0.508654	0.00660736
3_22975047	AT3G62030	AT3G62030.2,AT3G62030.3,AT3G62030.1	CYP20-3	+	A	G	0.0473617	850	0.328462	3.59396e-08
3_22975225	AT3G62030	AT3G62030.2,AT3G62030.3,AT3G62030.1	CYP20-3	+	A	G	0.00418535	14	2.28804	0.0625813
3_22975226	AT3G62030	AT3G62030.2,AT3G62030.3,AT3G62030.1	CYP20-3	+	A	G	0.0401544	104	0.811059	0.000142098
3_22975231	AT3G62030	AT3G62030.2,AT3G62030.3,AT3G62030.1	CYP20-3	+	A	G	0.00462351	14	1.87206	0.0377344
3_23001438	AT3G62120	AT3G62120.1,AT3G62120.3	AT3G62120	-	T	C	0.0110401	19	1.2695	0.0410467
3_23003803	AT3G62120	AT3G62120.1,AT3G62120.2	AT3G62120	-	T	C	0.0202361	36	0.491125	0.0537249
3_23037565	AT3G62250	AT3G62250.1	RPS27AC	+	A	G	0.00782114	99	0.183548	0.0758966
3_23037592	AT3G62250	AT3G62250.1	RPS27AC	+	A	G	0.00768856	79	0.699236	0.00479899
3_23037596	AT3G62250	AT3G62250.1	RPS27AC	+	A	G	0.0341734	339	0.0955895	0.068448
3_23053043	AT3G62290	AT3G62290.1,AT3G62290.2,AT3G62290.3	ARFA1E	+	A	G	0.00583215	82	0.688127	0.000371392
3_23053061	AT3G62290	AT3G62290.1,AT3G62290.2,AT3G62290.3	ARFA1E	+	A	G	0.0815092	1213	-0.0134621	0.0712666
3_23090601	AT3G62400	AT3G62400.2	AT3G62400	+	A	G	0.0582386	82	0.531157	0.0228206
3_23223354	AT3G62790	AT3G62790.1	AT3G62790	-	T	C	0.0228867	62	0.610514	0.0743129
3_23236017	AT3G62840	AT3G62840.1,AT3G62840.2	AT3G62840	-	T	C	0.00403863	23	0.852169	0.00701226
3_23334785	AT3G63170	AT3G63170.1	FAP1	+	A	G	0.0240623	34	0.757242	0.067829
3_23335951	AT3G63170	AT3G63170.1	FAP1	+	A	G	0.0461538	30	1.04363	0.0768586
3_23342846	AT3G63190	AT3G63190.1	RRF	-	T	C	0.123082	369	0.120473	0.0107477
3_23415960	AT3G63410	AT3G63410.1	VTE3	-	T	C	0.0360138	306	-0.0213457	0.0248265
3_23416301	AT3G63410	AT3G63410.1	VTE3	-	T	C	0.0168219	168	0.0926888	0.0493644
3_23431099	AT3G63460	AT3G63460.1,AT3G63460.2,AT3G63460.3	SEC31B	-	T	C	0.0202507	21	1.32728	0.0989179
3_23432588	AT3G63460	AT3G63460.1,AT3G63460.2,AT3G63460.3	SEC31B	-	T	C	0.032634	14	0.887203	0.0355364
3_23433641	AT3G63460	AT3G63460.1,AT3G63460.2,AT3G63460.3	SEC31B	-	T	C	0.0513369	48	1.5783	0.000115866
3_23444839	AT3G63490	AT3G63490.1,AT3G63490.2	RPL1	+	A	G	0.0538948	375	0.0635056	0.089586
3_23446077	AT3G63490	AT3G63490.1,AT3G63490.2	RPL1	+	A	G	0.292204	2290	0.2242	9.77404e-26
3_23446079	AT3G63490	AT3G63490.1,AT3G63490.2	RPL1	+	A	G	0.0458183	355	0.345201	6.88093e-07
3_23446084	AT3G63490	AT3G63490.1,AT3G63490.2	RPL1	+	A	G	0.0217054	154	0.316546	0.000674232
3_23446109	AT3G63490	AT3G63490.1,AT3G63490.2	RPL1	+	A	G	0.0256212	166	0.223185	0.0240867
3_23446170	AT3G63490	AT3G63490.1,AT3G63490.2	RPL1	+	A	G	0.0877792	334	0.247229	3.21114e-08
3_23459582	AT3G63540	AT3G63540.1	AT3G63540	-	T	C	0.00339698	58	1.12808	0.00162009
4_37125	AT4G00100	AT4G00100.1	RPS13B	+	A	G	0.0260829	56	0.549936	0.021774
4_37275	AT4G00100	AT4G00100.1	RPS13B	+	A	G	0.00927357	84	0.67814	0.00443233
4_37342	AT4G00100	AT4G00100.1	RPS13B	+	A	G	0.0211356	338	0.387486	7.45277e-05
4_37537	AT4G00100	AT4G00100.1	RPS13B	+	A	G	0.00516351	60	0.550597	0.0100805
4_37541	AT4G00100	AT4G00100.1	RPS13B	+	A	G	0.00862879	101	0.603629	7.76603e-06
4_37559	AT4G00100	AT4G00100.1	RPS13B	+	A	G	0.00445804	51	0.804758	0.0131335
4_37560	AT4G00100	AT4G00100.1	RPS13B	+	A	G	0.00480812	54	0.971343	0.00110473
4_37663	AT4G00100	AT4G00100.1	RPS13B	+	A	G	0.00318311	38	1.04089	0.0112943
4_37741	AT4G00100	AT4G00100.1	RPS13B	+	A	G	0.00279815	29	0.941295	0.0906365
4_37776	AT4G00100	AT4G00100.1	RPS13B	+	A	G	0.00397652	42	0.408507	0.0759377
4_37804	AT4G00100	AT4G00100.1	RPS13B	+	A	G	0.00135606	14	1.45474	0.0351093
4_38139	AT4G00100	AT4G00100.1	RPS13B	+	A	G	0.0361503	302	0.405754	5.70564e-05
4_38150	AT4G00100	AT4G00100.1	RPS13B	+	A	G	0.029304	208	0.71599	1.23365e-10
4_240842	AT4G00560	AT4G00560.2,AT4G00560.1,AT4G00560.4,AT4G00560.3	AT4G00560	-	T	C	0.0857988	29	0.983492	0.0026016
4_242175	AT4G00560	AT4G00560.2,AT4G00560.1,AT4G00560.4,AT4G00560.3	AT4G00560	-	T	C	0.0298329	25	1.32335	0.0141667
4_251065	AT4G00585	AT4G00585.1	AT4G00585	-	T	C	0.0960452	51	0.982356	0.000353287
4_251084	AT4G00585	AT4G00585.1	AT4G00585	-	T	C	0.147727	78	1.12704	1.52543e-06
4_251086	AT4G00585	AT4G00585.1	AT4G00585	-	T	C	0.0283186	16	1.63733	0.0303055
4_251087	AT4G00585	AT4G00585.1	AT4G00585	-	T	C	0.0384615	22	1.22327	0.0671258
4_251089	AT4G00585	AT4G00585.1	AT4G00585	-	T	C	0.547368	312	0.435009	3.81522e-09
4_251090	AT4G00585	AT4G00585.1	AT4G00585	-	T	C	0.025729	15	1.51	0.0171882
4_251124	AT4G00585	AT4G00585.1	AT4G00585	-	T	C	0.114781	139	0.323471	0.0304165
4_251155	AT4G00585	AT4G00585.1	AT4G00585	-	T	C	0.411846	598	0.140874	0.00130064
4_346444	AT4G00810	AT4G00810.1,AT4G00810.2	RPP1B	-	T	C	0.0217369	415	0.0661702	0.0179622
4_457327	AT4G01050	AT4G01050.2,AT4G01050.1	STR4	+	A	G	0.00113706	13	1.71222	0.0719344
4_457354	AT4G01050	AT4G01050.2,AT4G01050.1	STR4	+	A	G	0.00198462	24	1.09653	0.0900516
4_457375	AT4G01050	AT4G01050.2,AT4G01050.1	STR4	+	A	G	0.00707346	83	0.813948	0.0332222
4_458188	AT4G01050	AT4G01050.2,AT4G01050.1	STR4	+	A	G	0.0446945	286	1.08745	2.80068e-16
4_458209	AT4G01050	AT4G01050.2,AT4G01050.1	STR4	+	A	G	0.00859599	60	1.12427	0.000101948
4_458239	AT4G01050	AT4G01050.2,AT4G01050.1	STR4	+	A	G	0.00209974	12	1.29388	0.0278352
4_458244	AT4G01050	AT4G01050.2,AT4G01050.1	STR4	+	A	G	0.0245578	118	0.897498	0.000216847
4_458245	AT4G01050	AT4G01050.2,AT4G01050.1	STR4	+	A	G	0.20727	1072	0.672236	3.07503e-20
4_479576	AT4G01100	AT4G01100.1,AT4G01100.2,AT4G01100.3	ADNT1	+	A	G	0.132808	455	0.194603	0.0181631
4_493668	AT4G01150	AT4G01150.1,AT4G01150.2	CURT1A	+	A	G	0.0158387	110	0.467494	0.0444393
4_493671	AT4G01150	AT4G01150.1,AT4G01150.2	CURT1A	+	A	G	0.0111361	94	0.737581	0.0170665
4_494457	AT4G01150	AT4G01150.1,AT4G01150.2	CURT1A	+	A	G	0.0310838	789	0.311722	2.4076e-08
4_494483	AT4G01150	AT4G01150.1,AT4G01150.2	CURT1A	+	A	G	0.00149872	34	1.51098	0.0014477
4_494612	AT4G01150	AT4G01150.1,AT4G01150.2	CURT1A	+	A	G	0.00186627	35	0.854792	0.0190038
4_494646	AT4G01150	AT4G01150.1,AT4G01150.2	CURT1A	+	A	G	0.00419938	69	0.403666	0.0253042
4_545348	AT4G01310	AT4G01310.1	RPL5	-	T	C	0.00244437	29	1.24649	0.0678296
4_548996	AT4G01320	AT4G01320.1,AT4G01320.2	FACE1	+	A	G	0.030303	13	1.30481	0.0704695
4_732100	AT4G01690	AT4G01690.1	PPOX1	+	A	G	0.188821	902	0.506379	1.31314e-16
4_732105	AT4G01690	AT4G01690.1	PPOX1	+	A	G	0.00388305	17	1.91125	0.0340604
4_732291	AT4G01690	AT4G01690.1,AT4G01690.2	PPOX1	+	A	G	0.20127	317	0.537812	4.7185e-06
4_904212	AT4G02060	AT4G02060.1,AT4G02060.2	MCM7	+	A	G	0.084989	77	0.422552	0.0992132
4_979339	AT4G02230	AT4G02230.1	RPL19C	-	T	C	0.0716724	84	0.380272	0.00327967
4_1002617	AT4G02290	AT4G02290.1,AT4G02290.2	AtGH9B13	-	T	C	0.127358	27	1.82443	0.0497463
4_1042971	AT4G02370	AT4G02370.1	AT4G02370	+	A	G	0.119097	58	0.53873	0.0720537
4_1058220	AT4G02405	AT4G02405.1,AT4G02405.2	AT4G02405	-	T	C	0.0863636	19	1.16221	0.0144067
4_1073996	AT4G02450	AT4G02450.1,AT4G02450.2	AT4G02450	-	T	C	0.0232202	167	0.395467	0.00756471
4_1075175	AT4G02450	AT4G02450.1,AT4G02450.2	AT4G02450	-	T	C	0.0570403	429	0.379517	1.39337e-09
4_1130858	AT4G02570	AT4G02570.1,AT4G02570.2,AT4G02570.3,AT4G02570.4	CUL1	+	A	G	0.0260557	29	2.03611	0.000146486
4_1136967	AT4G02580	AT4G02580.1	AT4G02580	+	A	G	0.0215736	34	0.782349	0.0508246
4_1441448	AT4G03280	AT4G03280.1,AT4G03280.2	PETC	+	A	G	0.00298852	57	0.556754	0.0601679
4_1441449	AT4G03280	AT4G03280.1,AT4G03280.2	PETC	+	A	G	0.24681	4758	0.355251	1.5287e-13
4_1562479	AT4G03520	AT4G03520.1	ATHM2	-	T	C	0.140283	109	0.400848	0.0296407
4_1562652	AT4G03520	AT4G03520.1,AT4G03520.2	ATHM2	-	T	C	0.00392542	24	1.6846	0.00918715
4_1562655	AT4G03520	AT4G03520.1,AT4G03520.2	ATHM2	-	T	C	0.00313428	19	1.08662	0.0262424
4_1563869	AT4G03520	AT4G03520.1	ATHM2	-	T	C	0.00919983	86	0.731271	0.0029284
4_2350673	AT4G04640	AT4G04640.1	ATPC1	-	T	C	0.0361543	179	0.64408	1.71848e-06
4_2490004	AT4G04910	AT4G04910.1	NSF	-	T	C	0.152225	65	1.25335	0.0015777
4_2817567	AT4G05530	AT4G05530.1	SDRA	+	A	G	0.106021	81	0.663687	0.0807103
4_2818002	AT4G05530	AT4G05530.1	SDRA	+	A	G	0.146316	139	0.749985	5.30716e-05
4_3940302	AT4G06701	AT4G06701.1,AT4G06701.2,AT4G06701.3,AT4G06701.4,AT4G06701.5	AT4G06701	-	T	C	0.0420475	23	0.840819	0.00161472
4_5231867	AT4G08280	AT4G08280.2,AT4G08280.1	AT4G08280	+	A	G	0.0640327	47	0.502169	0.00042605
4_5231905	AT4G08280	AT4G08280.2,AT4G08280.1	AT4G08280	+	A	G	0.0221893	15	0.592119	0.046612
4_5231909	AT4G08280	AT4G08280.2,AT4G08280.1	AT4G08280	+	A	G	0.142395	88	0.196124	0.0314349
4_5231916	AT4G08280	AT4G08280.2,AT4G08280.1	AT4G08280	+	A	G	0.0791139	50	0.855469	0.0010197
4_5231932	AT4G08280	AT4G08280.2,AT4G08280.1	AT4G08280	+	A	G	0.149832	89	0.635776	0.000410702
4_5231947	AT4G08280	AT4G08280.2,AT4G08280.1	AT4G08280	+	A	G	0.0746004	42	1.14718	0.00137675
4_5231957	AT4G08280	AT4G08280.2,AT4G08280.1	AT4G08280	+	A	G	0.305019	158	0.621924	0.000826063
4_5795868	AT4G09040	AT4G09040.1,AT4G09040.2	AT4G09040	-	T	C	0.0340671	65	0.400518	0.0652946
4_5924187	AT4G09320	AT4G09320.1	NDPK1	+	A	G	0.0210091	523	0.231851	0.00112087
4_5924337	AT4G09320	AT4G09320.1	NDPK1	+	A	G	0.0192095	208	0.229146	0.0150527
4_6174628	AT4G09800	AT4G09800.1	RPS18A	+	A	G	0.0396248	414	0.130687	0.0299193
4_6174680	AT4G09800	AT4G09800.1	RPS18A	+	A	G	0.399204	4313	0.0760758	0.0387233
4_6385959	AT4G10300	AT4G10300.1	AT4G10300	+	A	G	0.0408895	57	1.0305	0.00115567
4_6398427	AT4G10320	AT4G10320.1	AT4G10320	-	T	C	0.0629067	58	0.685163	0.00179704
4_6408300	AT4G10340	AT4G10340.1	LHCB5	+	A	G	0.00127619	88	0.423784	0.0327127
4_6408521	AT4G10340	AT4G10340.1	LHCB5	+	A	G	0.000319776	27	2.35274	0.0238162
4_6409052	AT4G10340	AT4G10340.1	LHCB5	+	A	G	0.000247219	21	2.30984	0.0704854
4_6409068	AT4G10340	AT4G10340.1	LHCB5	+	A	G	0.0139289	1195	0.278803	0.00742075
4_6409280	AT4G10340	AT4G10340.1	LHCB5	+	A	G	0.00141213	107	0.273195	0.0949514
4_6409319	AT4G10340	AT4G10340.1	LHCB5	+	A	G	0.0049314	294	0.3055	0.00167247
4_6409444	AT4G10340	AT4G10340.1	LHCB5	+	A	G	0.00121528	48	0.600991	0.0269361
4_6732834	AT4G11010	AT4G11010.1	NDPK3	-	T	C	0.0112405	56	0.922321	9.59809e-05
4_6732887	AT4G11010	AT4G11010.1	NDPK3	-	T	C	0.0480019	203	0.403309	0.000172474
4_6732992	AT4G11010	AT4G11010.1	NDPK3	-	T	C	0.00958589	50	0.648483	0.0382802
4_6733264	AT4G11010	AT4G11010.1	NDPK3	-	T	C	0.0222177	110	0.966594	7.36374e-06
4_6733298	AT4G11010	AT4G11010.1	NDPK3	-	T	C	0.00694611	29	0.884522	0.0399868
4_6733867	AT4G11010	AT4G11010.1	NDPK3	-	T	C	0.00292731	18	1.17379	0.0625813
4_6947788	AT4G11420	AT4G11420.1	TIF3A1	-	T	C	0.0145914	15	1.24384	0.0116522
4_6947789	AT4G11420	AT4G11420.1	TIF3A1	-	T	C	0.0619048	65	0.742784	0.00762343
4_6947896	AT4G11420	AT4G11420.1	TIF3A1	-	T	C	0.168704	207	0.175027	0.000878699
4_6948181	AT4G11420	AT4G11420.1	TIF3A1	-	T	C	0.0677377	156	0.229352	0.00189916
4_7228278	AT4G12060	AT4G12060.1	AT4G12060	-	T	C	0.0439901	71	0.965362	9.10219e-06
4_7228308	AT4G12060	AT4G12060.1	AT4G12060	-	T	C	0.0816219	155	0.245462	0.0551426
4_7521504	AT4G12800	AT4G12800.2,AT4G12800.1	PSAL	+	A	G	0.0029772	88	0.730571	0.00137485
4_7522590	AT4G12800	AT4G12800.2,AT4G12800.1	PSAL	+	A	G	0.0251994	139	0.749659	2.14065e-05
4_7655257	AT4G13170	AT4G13170.1	RPL13AC	-	T	C	0.00963192	28	0.432656	0.0744309
4_7804689	AT4G13430	AT4G13430.1	IIL1	-	T	C	0.0183434	130	0.791495	9.3034e-05
4_7864558	AT4G13520	AT4G13520.1,AT4G13520.2	SMAP1	+	A	G	0.103555	705	0.110244	0.0013195
4_7864559	AT4G13520	AT4G13520.1,AT4G13520.2	SMAP1	+	A	G	0.0859352	589	0.22157	2.03442e-11
4_7901427	AT4G13590	AT4G13590.1,AT4G13590.2	AT4G13590	-	T	C	0.0125313	12	-0.289351	0.0753031
4_7901595	AT4G13590	AT4G13590.1,AT4G13590.2	AT4G13590	-	T	C	0.0218289	37	0.680013	0.0752651
4_7948931	AT4G13670	AT4G13670.1,AT4G13670.3,AT4G13670.2	PTAC5	+	A	G	0.152838	140	0.340519	0.0807654
4_7950387	AT4G13670	AT4G13670.1,AT4G13670.3,AT4G13670.2	PTAC5	+	A	G	0.114686	139	0.333333	0.0155368
4_7967263	AT4G13720	AT4G13720.1,AT4G13720.2	AT4G13720	-	T	C	0.0446533	38	1.12868	0.000126393
4_7972007	AT4G13730	AT4G13730.1,AT4G13730.3,AT4G13730.2	AT4G13730	+	A	G	0.0909091	18	1.59712	0.0582957
4_8171855	AT4G14160	AT4G14160.2,AT4G14160.3,AT4G14160.1	AT4G14160	+	A	G	0.112815	103	0.739442	0.00118149
4_8242712	AT4G14320	AT4G14320.1	RPL36AB	-	T	C	0.213912	1553	0.482642	1.01835e-13
4_8302067	AT4G14420	AT4G14420.1	AT4G14420	-	T	C	0.03667	37	0.989633	0.0232962
4_8302072	AT4G14420	AT4G14420.1	AT4G14420	-	T	C	0.0611702	69	0.443792	0.0205556
4_8302098	AT4G14420	AT4G14420.1	AT4G14420	-	T	C	0.022339	34	0.995055	0.0601679
4_8424912	AT4G14710	AT4G14710.1,AT4G14710.5,AT4G14710.4,AT4G14710.6,AT4G14710.3	ARD3	-	T	C	0.0668524	48	0.345077	0.0508859
4_8500522	AT4G14800	AT4G14800.1,AT4G14800.2	PBD2	+	A	G	0.0688293	244	0.445082	0.00137485
4_8518632	AT4G14880	AT4G14880.1,AT4G14880.2,AT4G14880.3,AT4G14880.4,AT4G14880.5	OASA1	-	T	C	0.00268329	31	0.878746	0.0889424
4_8519360	AT4G14880	AT4G14880.1,AT4G14880.2,AT4G14880.3,AT4G14880.4,AT4G14880.5	OASA1	-	T	C	0.00328003	24	1.52624	0.0210475
4_8519828	AT4G14880	AT4G14880.1,AT4G14880.2,AT4G14880.3,AT4G14880.4,AT4G14880.5	OASA1	-	T	C	0.00159699	17	0.999803	0.0661551
4_8520032	AT4G14880	AT4G14880.1,AT4G14880.2,AT4G14880.3,AT4G14880.4,AT4G14880.5	OASA1	-	T	C	0.0174345	151	0.418319	0.0236515
4_8528435	AT4G14910	AT4G14910.1,AT4G14910.3,AT4G14910.2	HISN5B	-	T	C	0.0223642	14	2.85992	0.0479323
4_8548808	AT4G14960	AT4G14960.2,AT4G14960.1	TUBA6	-	T	C	0.00283471	26	0.750322	0.0852736
4_8549631	AT4G14960	AT4G14960.2,AT4G14960.1	TUBA6	-	T	C	0.0188297	223	0.824606	6.56833e-07
4_8549632	AT4G14960	AT4G14960.2,AT4G14960.1	TUBA6	-	T	C	0.00542765	62	1.3817	0.000266251
4_8549633	AT4G14960	AT4G14960.2,AT4G14960.1	TUBA6	-	T	C	0.00800777	99	0.96289	0.000325404
4_8549634	AT4G14960	AT4G14960.2,AT4G14960.1	TUBA6	-	T	C	0.00261361	31	1.77248	0.0323862
4_8550275	AT4G14960	AT4G14960.2,AT4G14960.1	TUBA6	-	T	C	0.00249027	32	3.27609	0.00015045
4_8861617	AT4G15510	AT4G15510.1,AT4G15510.2,AT4G15510.3	PPD1	+	A	G	0.0174292	16	12.4084	0.0087611
4_9028524	AT4G15910	AT4G15910.1	ATDI21	+	A	G	0.0187062	72	0.645206	0.0558061
4_9040082	AT4G15940	AT4G15940.1	AT4G15940	+	A	G	0.045977	20	1.38044	0.0320546
4_9154375	AT4G16155	AT4G16155.1	LPD2	-	T	C	0.0500472	53	0.449359	0.0310169
4_9154532	AT4G16155	AT4G16155.1	LPD2	-	T	C	0.0552846	68	0.716617	0.00627269
4_9247863	AT4G16370	AT4G16370.1	ATOPT3	-	T	C	0.0118629	54	0.885079	0.0646358
4_9280509	AT4G16450	AT4G16450.1,AT4G16450.2	AT4G16450	+	A	G	0.229409	869	0.106846	0.0085823
4_9381323	AT4G16660	AT4G16660.2,AT4G16660.1	HSP70-17	+	A	G	0.0874636	30	0.882624	0.0123752
4_9400382	AT4G16720	AT4G16720.1	RPL15A	-	T	C	0.0674181	1298	0.32486	7.99694e-07
4_9400565	AT4G16720	AT4G16720.1	RPL15A	-	T	C	0.0064812	130	0.359588	0.0124404
4_9401012	AT4G16720	AT4G16720.1	RPL15A	-	T	C	0.0383639	952	0.227148	0.000164727
4_9401079	AT4G16720	AT4G16720.1	RPL15A	-	T	C	0.00290186	66	0.636519	0.0184838
4_9585864	AT4G17040	AT4G17040.1	CLPR4	-	T	C	0.476323	855	0.165705	0.00230703
4_9644877	AT4G17170	AT4G17170.1	RABB1C	-	T	C	0.204392	121	0.587423	4.52939e-05
4_9706232	AT4G17370	AT4G17370.1,AT4G17370.2	AT4G17370	+	A	G	0.0507246	14	1.76098	0.0700452
4_9714414	AT4G17390	AT4G17390.1	RPL15B	-	T	C	0.130871	691	0.350949	4.46474e-06
4_9714433	AT4G17390	AT4G17390.1	RPL15B	-	T	C	0.00547474	35	0.722499	0.0144345
4_9714444	AT4G17390	AT4G17390.1	RPL15B	-	T	C	0.00772038	55	0.772521	0.00338846
4_9714513	AT4G17390	AT4G17390.1	RPL15B	-	T	C	0.00488795	53	0.815387	0.021774
4_9714517	AT4G17390	AT4G17390.1	RPL15B	-	T	C	0.0323714	350	0.429343	0.000682905
4_9773178	AT4G17520	AT4G17520.1	AT4G17520	+	A	G	0.037225	132	1.21407	2.53553e-08
4_9773179	AT4G17520	AT4G17520.1	AT4G17520	+	A	G	0.0419269	141	0.383639	0.0212075
4_9773234	AT4G17520	AT4G17520.1	AT4G17520	+	A	G	0.077524	258	0.611294	3.21304e-06
4_9781181	AT4G17560	AT4G17560.1	AT4G17560	+	A	G	0.00467577	38	0.366032	0.0941657
4_9917958	AT4G17830	AT4G17830.1,AT4G17830.2	AT4G17830	+	A	G	0.223035	122	0.480501	0.00375152
4_10027730	AT4G18060	AT4G18060.1	AT4G18060	-	T	C	0.0593407	27	1.1592	0.0813169
4_10035581	AT4G18100	AT4G18100.1	RPL32A	-	T	C	0.0171674	24	1.1152	0.0443327
4_10035741	AT4G18100	AT4G18100.1	RPL32A	-	T	C	0.0292864	316	0.213232	0.000101204
4_10035806	AT4G18100	AT4G18100.1	RPL32A	-	T	C	0.0449777	686	0.166332	0.0159215
4_10035807	AT4G18100	AT4G18100.1	RPL32A	-	T	C	0.113899	1784	0.244964	0.000105727
4_10201902	AT4G18480	AT4G18480.1	CHLI1	-	T	C	0.0019992	15	1.78537	0.0440217
4_10202009	AT4G18480	AT4G18480.1	CHLI1	-	T	C	0.00371394	43	1.17509	0.000673511
4_10302356	AT4G18730	AT4G18730.1	RPL11B	+	A	G	0.0502181	564	0.659424	9.20528e-21
4_10302383	AT4G18730	AT4G18730.1	RPL11B	+	A	G	0.0059743	86	0.597885	0.000984403
4_10303090	AT4G18730	AT4G18730.1	RPL11B	+	A	G	0.0111101	124	0.281978	0.0483467
4_10303163	AT4G18730	AT4G18730.1	RPL11B	+	A	G	0.00215054	14	1.33362	0.0593401
4_10303181	AT4G18730	AT4G18730.1	RPL11B	+	A	G	0.0112396	69	0.131111	0.00823183
4_10303207	AT4G18730	AT4G18730.1	RPL11B	+	A	G	0.127404	477	0.316866	4.42319e-07
4_10504955	AT4G19210	AT4G19210.1	ABCE2	+	A	G	0.0802548	126	1.24819	1.83426e-10
4_10505001	AT4G19210	AT4G19210.1	ABCE2	+	A	G	0.0991413	127	0.789967	5.5671e-06
4_10505104	AT4G19210	AT4G19210.1	ABCE2	+	A	G	0.120112	43	1.19892	0.00248711
4_10581087	AT4G19410	AT4G19410.2	PAE7	-	T	C	0.295567	60	0.661382	0.00356481
4_10888322	AT4G20150	AT4G20150.1	AT4G20150	-	T	C	0.0318755	43	1.39114	4.49949e-05
4_10888541	AT4G20150	AT4G20150.1	AT4G20150	-	T	C	0.00292063	23	0.810232	0.0102182
4_10943170	AT4G20260	AT4G20260.1,AT4G20260.4,AT4G20260.6,AT4G20260.5	PCAP1	+	A	G	0.0114943	31	0.962546	0.0084007
4_10991087	AT4G20360	AT4G20360.1,AT4G20360.2	TUFA	+	A	G	0.0118205	227	0.297519	0.00455407
4_11022821	AT4G20440	AT4G20440.1,AT4G20440.3,AT4G20440.4	SMB	-	T	C	0.0813704	76	0.326763	0.021774
4_11130331	AT4G20760	AT4G20760.2,AT4G20760.1	AT4G20760	+	A	G	0.0902326	97	0.520059	0.00140763
4_11266399	AT4G21105	AT4G21105.1,AT4G21105.3	AT4G21105	+	A	G	0.0169549	151	0.456185	0.000457787
4_11266414	AT4G21105	AT4G21105.1,AT4G21105.3	AT4G21105	+	A	G	0.0579987	517	0.360304	1.00161e-09
4_11266690	AT4G21105	AT4G21105.1,AT4G21105.3	AT4G21105	+	A	G	0.0976629	865	0.191616	3.30634e-06
4_11266715	AT4G21105	AT4G21105.1,AT4G21105.3	AT4G21105	+	A	G	0.0665629	513	0.743968	2.63935e-24
4_11266723	AT4G21105	AT4G21105.1,AT4G21105.3	AT4G21105	+	A	G	0.0396012	286	0.504476	6.85687e-06
4_11266724	AT4G21105	AT4G21105.1,AT4G21105.3	AT4G21105	+	A	G	0.0813531	582	0.472287	9.51856e-11
4_11266772	AT4G21105	AT4G21105.1,AT4G21105.3	AT4G21105	+	A	G	0.0115327	62	0.724899	0.0183818
4_11266783	AT4G21105	AT4G21105.1,AT4G21105.3	AT4G21105	+	A	G	0.00458811	22	1.27074	0.0100824
4_11266799	AT4G21105	AT4G21105.1,AT4G21105.3	AT4G21105	+	A	G	0.168307	684	0.67121	2.5358e-24
4_11335159	AT4G21280	AT4G21280.1,AT4G21280.2	PSBQ1	+	A	G	0.00423206	199	0.575576	0.000717367
4_11335190	AT4G21280	AT4G21280.1,AT4G21280.2	PSBQ1	+	A	G	0.000950832	38	1.04246	0.0456141
4_11335617	AT4G21280	AT4G21280.1,AT4G21280.2	PSBQ1	+	A	G	0.00750352	48	0.637405	0.0167448
4_11600217	AT4G21860	AT4G21860.1,AT4G21860.2	MSRB2	-	T	C	0.0219561	33	1.45687	0.0336893
4_11600276	AT4G21860	AT4G21860.1,AT4G21860.2	MSRB2	-	T	C	0.0811951	231	0.74691	9.27612e-09
4_11600375	AT4G21860	AT4G21860.1,AT4G21860.2	MSRB2	-	T	C	0.00694272	28	0.856045	0.0977966
4_11600542	AT4G21860	AT4G21860.1,AT4G21860.2	MSRB2	-	T	C	0.00486136	27	1.34946	0.0108289
4_11759390	AT4G22220	AT4G22220.1	ISU1	-	T	C	0.0117878	24	1.44938	0.00253639
4_11759398	AT4G22220	AT4G22220.1	ISU1	-	T	C	0.205339	400	0.205685	4.53593e-06
4_11791933	AT4G22310	AT4G22310.1	MPC4	+	A	G	0.0425564	281	0.521673	2.06974e-10
4_11792664	AT4G22310	AT4G22310.1	MPC4	+	A	G	0.0104593	23	1.37354	0.0986356
4_11792671	AT4G22310	AT4G22310.1	MPC4	+	A	G	0.148293	304	0.306842	0.000120863
4_11792697	AT4G22310	AT4G22310.1	MPC4	+	A	G	0.00634146	13	1.18616	0.0646358
4_11851605	AT4G22505	AT4G22505.1	AT4G22505	-	T	C	0.0763359	100	0.482946	0.0871451
4_11920580	AT4G22670	AT4G22670.1	AtHip1	+	A	G	0.00614251	20	1.49818	0.0292219
4_11920683	AT4G22670	AT4G22670.1	AtHip1	+	A	G	0.0661479	68	0.537746	1.83423e-05
4_12007829	AT4G22890	AT4G22890.1,AT4G22890.5,AT4G22890.4,AT4G22890.2	PGRL1A	+	A	G	0.00695814	60	1.05285	0.0522617
4_12021148	AT4G22930	AT4G22930.1,AT4G22930.2	PYR4	+	A	G	0.0396396	22	1.16672	0.0744959
4_12249847	AT4G23470	AT4G23470.1,AT4G23470.3,AT4G23470.4,AT4G23470.2	AT4G23470	+	A	G	0.0522803	47	0.81675	0.0367782
4_12319136	AT4G23630	AT4G23630.1,AT4G23630.2	RTNLB1	+	A	G	0.00409556	18	0.750897	0.0222081
4_12551889	AT4G24190	AT4G24190.1,AT4G24190.2	SHD	-	T	C	0.0133779	32	1.78847	0.0120352
4_12551915	AT4G24190	AT4G24190.1,AT4G24190.2	SHD	-	T	C	0.0365854	87	0.455707	0.0291139
4_12551926	AT4G24190	AT4G24190.1,AT4G24190.2	SHD	-	T	C	0.108108	280	0.451208	0.000255241
4_12590193	AT4G24280	AT4G24280.1	HSP70-6	+	A	G	0.104466	276	0.191402	0.00563767
4_12593381	AT4G24280	AT4G24280.1	HSP70-6	+	A	G	0.0263025	104	0.65743	0.0239694
4_12604054	AT4G24330	AT4G24330.1	AT4G24330	-	T	C	0.514587	829	0.334822	1.662e-07
4_12677986	AT4G24550	AT4G24550.2,AT4G24550.1,AT4G24550.3	AP4M	+	A	G	0.0825023	91	0.704902	0.00364203
4_12710872	AT4G24620	AT4G24620.1,AT4G24620.2	PGI1	-	T	C	0.00909608	16	2.01443	0.00765153
4_12743911	AT4G24690	AT4G24690.1	AT4G24690	+	A	G	0.208598	427	0.207492	0.0151329
4_12758423	AT4G24750	AT4G24750.1	STR11	-	T	C	0.0206629	48	1.54388	0.00308719
4_12758458	AT4G24750	AT4G24750.1	STR11	-	T	C	0.109381	295	0.556287	1.10712e-09
4_12766996	AT4G24770	AT4G24770.1,AT4G24770.2	CP31A	-	T	C	0.000767598	17	3.13841	0.0249668
4_12767829	AT4G24770	AT4G24770.1,AT4G24770.2	CP31A	-	T	C	0.00488393	81	0.410019	0.0113446
4_12819720	AT4G24920	AT4G24920.1,AT4G24920.2	SEC61G2	-	T	C	0.0326437	71	0.580345	0.00151735
4_12821865	AT4G24930	AT4G24930.1	AT4G24930	-	T	C	0.0261237	68	0.884893	0.0213571
4_12870450	AT4G25050	AT4G25050.1,AT4G25050.2	ACP4	+	A	G	0.000625056	14	2.84286	0.0511294
4_12870997	AT4G25050	AT4G25050.1,AT4G25050.2	ACP4	+	A	G	0.013835	221	0.479618	0.00197858
4_12870998	AT4G25050	AT4G25050.1,AT4G25050.2	ACP4	+	A	G	0.0034632	52	0.743805	0.00681246
4_12877396	AT4G25080	AT4G25080.1,AT4G25080.6,AT4G25080.4	CHLM	+	A	G	0.00436834	50	0.800621	0.0789256
4_12884597	AT4G25100	AT4G25100.1,AT4G25100.4	FSD1	-	T	C	0.0189448	186	0.779733	1.16408e-08
4_12884623	AT4G25100	AT4G25100.1,AT4G25100.4	FSD1	-	T	C	0.224623	2412	0.525767	1.65067e-21
4_12884727	AT4G25100	AT4G25100.1,AT4G25100.4	FSD1	-	T	C	0.00276154	43	1.02678	0.0167967
4_12884731	AT4G25100	AT4G25100.1,AT4G25100.4	FSD1	-	T	C	0.00949029	151	0.817756	0.00122599
4_12885546	AT4G25100	AT4G25100.1,AT4G25100.4	FSD1	-	T	C	0.00876211	133	0.8488	5.13287e-07
4_12885556	AT4G25100	AT4G25100.1,AT4G25100.4	FSD1	-	T	C	0.00101058	17	4.43251	0.00303123
4_12899563	AT4G25130	AT4G25130.1	MSR4	-	T	C	0.0355196	228	0.865474	5.6854e-18
4_12973246	AT4G25370	AT4G25370.1	AT4G25370	+	A	G	0.00492854	20	1.65278	0.0827801
4_12973299	AT4G25370	AT4G25370.1	AT4G25370	+	A	G	0.0117938	62	0.642477	0.0200814
4_12974356	AT4G25370	AT4G25370.1	AT4G25370	+	A	G	0.300233	1802	0.335428	4.19117e-07
4_12974393	AT4G25370	AT4G25370.1	AT4G25370	+	A	G	0.0223749	114	0.459472	0.000172409
4_12974413	AT4G25370	AT4G25370.1	AT4G25370	+	A	G	0.0117279	60	0.436811	0.0953789
4_12974633	AT4G25370	AT4G25370.1	AT4G25370	+	A	G	0.0272109	92	1.30347	8.87853e-06
4_12974662	AT4G25370	AT4G25370.1	AT4G25370	+	A	G	0.0162402	33	1.42556	0.0627791
4_12974682	AT4G25370	AT4G25370.1	AT4G25370	+	A	G	0.0178273	32	1.61862	5.65761e-05
4_12974719	AT4G25370	AT4G25370.1	AT4G25370	+	A	G	0.13555	212	0.895716	2.08303e-10
4_13102256	AT4G25720	AT4G25720.1,AT4G25720.2,AT4G25720.5,AT4G25720.3,AT4G25720.4	QCT	-	T	C	0.0511182	16	1.62579	0.0921784
4_13235554	AT4G26110	AT4G26110.1,AT4G26110.2	NAP1;1	+	A	G	0.0201669	29	1.05819	0.0301346
4_13308466	AT4G26300	AT4G26300.5,AT4G26300.1,AT4G26300.3,AT4G26300.2,AT4G26300.4	emb1027	-	T	C	0.0139002	17	3.94425	0.0402835
4_13520303	AT4G26910	AT4G26910.2,AT4G26910.1,AT4G26910.3	AT4G26910	-	T	C	0.0219178	16	0.988615	0.0958224
4_13554762	AT4G27000	AT4G27000.1	RBP45C	-	T	C	0.259804	106	0.72563	0.000493274
4_13554788	AT4G27000	AT4G27000.1	RBP45C	-	T	C	0.515517	299	0.433007	4.80505e-06
4_13554789	AT4G27000	AT4G27000.1	RBP45C	-	T	C	0.166951	98	0.501485	0.00999214
4_13554794	AT4G27000	AT4G27000.1	RBP45C	-	T	C	0.530327	341	0.32788	3.35622e-05
4_13554905	AT4G27000	AT4G27000.1	RBP45C	-	T	C	0.0697796	133	0.196965	0.0823175
4_13555412	AT4G27000	AT4G27000.1	RBP45C	-	T	C	0.107902	198	0.256204	0.00130064
4_13594140	AT4G27090	AT4G27090.1	RPL14B	-	T	C	0.0261422	317	0.26559	0.00063842
4_13594277	AT4G27090	AT4G27090.1	RPL14B	-	T	C	0.0249726	365	0.162588	0.0516127
4_13594483	AT4G27090	AT4G27090.1	RPL14B	-	T	C	0.0811874	2147	0.0636283	6.46911e-07
4_13594505	AT4G27090	AT4G27090.1	RPL14B	-	T	C	0.00261975	88	0.299941	0.0797861
4_13594904	AT4G27090	AT4G27090.1	RPL14B	-	T	C	0.00172771	50	0.726164	0.0969545
4_13803672	AT4G27650	AT4G27650.1,AT4G27650.2,AT4G27650.3	PEL1	-	T	C	0.129032	28	0.863271	0.0815003
4_13805028	AT4G27650	AT4G27650.1,AT4G27650.2,AT4G27650.3	PEL1	-	T	C	0.0564516	14	2.93411	0.063404
4_13944185	AT4G28060	AT4G28060.1	COX6B-3	-	T	C	0.340391	1254	0.162235	1.11251e-06
4_13944223	AT4G28060	AT4G28060.1	COX6B-3	-	T	C	0.0674773	283	0.0894754	0.00309829
4_13944332	AT4G28060	AT4G28060.1	COX6B-3	-	T	C	0.2123	970	0.112617	0.000144606
4_14150982	AT4G28660	AT4G28660.1,AT4G28660.2	PSB28	+	A	G	0.0512972	87	0.320927	0.017608
4_14169781	AT4G28706	AT4G28706.2,AT4G28706.3,AT4G28706.1,AT4G28706.4	AT4G28706	+	A	G	0.0272315	18	1.2481	0.0968605
4_14203782	AT4G28750	AT4G28750.1	PSAE1	-	T	C	0.0032113	155	0.45502	0.000573799
4_14297795	AT4G29010	AT4G29010.1	AIM1	-	T	C	0.0465587	92	0.420948	0.0888262
4_14321206	AT4G29060	AT4G29060.1,AT4G29060.2	emb2726	+	A	G	0.191161	372	0.357784	1.71207e-06
4_14382321	AT4G29160	AT4G29160.1,AT4G29160.2	VPS32.2	+	A	G	0.027417	38	0.797718	0.0552282
4_14465213	AT4G29390	AT4G29390.1	RPS30C	-	T	C	0.0198447	184	0.226412	0.0392106
4_14465908	AT4G29390	AT4G29390.1	RPS30C	-	T	C	0.00249377	13	1.95434	0.0661551
4_14468388	AT4G29410	AT4G29410.1,AT4G29410.2	RPL28C	-	T	C	0.0241834	77	0.826133	0.00019024
4_14473292	AT4G29430	AT4G29430.1	RPS15AE	+	A	G	0.15857	173	0.354232	0.000164785
4_14486275	AT4G29480	AT4G29480.1	AT4G29480	-	T	C	0.0062396	15	0.616722	0.0354591
4_14562907	AT4G29735	AT4G29735.1,AT4G29735.2	AT4G29735	-	T	C	0.256739	200	0.476385	0.00975935
4_14562921	AT4G29735	AT4G29735.1,AT4G29735.2	AT4G29735	-	T	C	0.101138	80	0.932561	0.000354608
4_14562922	AT4G29735	AT4G29735.1,AT4G29735.2	AT4G29735	-	T	C	0.207241	166	0.594697	0.00819625
4_14598602	AT4G29830	AT4G29830.1	VIP3	+	A	G	0.0751566	72	1.45868	4.13703e-06
4_14672959	AT4G30010	AT4G30010.1	AT4G30010	+	A	G	0.00621492	31	0.925447	0.0440151
4_14674036	AT4G30010	AT4G30010.1	AT4G30010	+	A	G	0.141688	225	0.648178	7.2745e-08
4_14771021	AT4G30190	AT4G30190.1,AT4G30190.2	AHA2	-	T	C	0.0128134	23	0.90919	0.0813169
4_14938076	AT4G30600	AT4G30600.1,AT4G30600.2	AT4G30600	-	T	C	0.0381944	22	1.49099	0.0992018
4_14938154	AT4G30600	AT4G30600.1,AT4G30600.2	AT4G30600	-	T	C	0.0130862	12	0.757146	0.081436
4_14938601	AT4G30600	AT4G30600.1,AT4G30600.2	AT4G30600	-	T	C	0.0158061	15	1.74221	0.0819768
4_14938637	AT4G30600	AT4G30600.1,AT4G30600.2	AT4G30600	-	T	C	0.104019	88	0.652187	0.000288947
4_14949059	AT4G30620	AT4G30620.1	AT4G30620	-	T	C	0.0237819	41	1.05452	0.0350012
4_15043291	AT4G30910	AT4G30910.1,AT4G30910.2	AT4G30910	-	T	C	0.22372	83	0.650903	0.000755751
4_15046622	AT4G30920	AT4G30920.1	AT4G30920	-	T	C	0.0416426	72	0.661463	0.00296672
4_15047257	AT4G30920	AT4G30920.1	AT4G30920	-	T	C	0.176577	294	0.589468	4.57412e-07
4_15057427	AT4G30950	AT4G30950.1	FAD6	-	T	C	0.00302671	23	1.71291	0.0337075
4_15057630	AT4G30950	AT4G30950.1	FAD6	-	T	C	0.0311221	251	0.389683	0.0210111
4_15058024	AT4G30950	AT4G30950.1	FAD6	-	T	C	0.0223908	186	0.173002	0.0575825
4_15159321	AT4G31180	AT4G31180.1,AT4G31180.2	AT4G31180	+	A	G	0.103419	121	0.190083	0.0188477
4_15190657	AT4G31300	AT4G31300.1,AT4G31300.2	PBA1	+	A	G	0.117734	555	0.289896	7.17085e-07
4_15190993	AT4G31300	AT4G31300.1,AT4G31300.2	PBA1	+	A	G	0.0267281	29	1.08289	0.00338433
4_15207369	AT4G31340	AT4G31340.1,AT4G31340.2	AT4G31340	+	A	G	0.0533333	36	0.824126	0.0453075
4_15208977	AT4G31340	AT4G31340.1,AT4G31340.2	AT4G31340	+	A	G	0.356557	348	0.279446	2.29015e-05
4_15209330	AT4G31340	AT4G31340.1,AT4G31340.2	AT4G31340	+	A	G	0.0549313	44	0.552414	0.0408825
4_15308257	AT4G31580	AT4G31580.1,AT4G31580.2	RSZ22	+	A	G	0.159046	80	0.747928	0.0499329
4_15346476	AT4G31700	AT4G31700.1,AT4G31700.2	RPS6A	-	T	C	0.0012987	20	2.73625	0.0326664
4_15346531	AT4G31700	AT4G31700.1,AT4G31700.2	RPS6A	-	T	C	0.00195804	28	1.27972	0.0955048
4_15470365	AT4G31985	AT4G31985.1	RPL39C	+	A	G	0.0820043	869	0.222092	3.52081e-07
4_15470373	AT4G31985	AT4G31985.1	RPL39C	+	A	G	0.0839509	861	0.262562	2.18758e-08
4_15470974	AT4G31990	AT4G31990.1,AT4G31990.4	ASP5	-	T	C	0.0341506	39	0.758344	0.0102066
4_15471090	AT4G31990	AT4G31990.1,AT4G31990.3,AT4G31990.4	ASP5	-	T	C	0.197266	534	0.28885	9.22153e-09
4_15520254	AT4G32130	AT4G32130.1	AT4G32130	-	T	C	0.0897436	42	0.653585	0.0928521
4_15520297	AT4G32130	AT4G32130.1	AT4G32130	-	T	C	0.0299296	17	1.78262	0.00591661
4_15520310	AT4G32130	AT4G32130.1	AT4G32130	-	T	C	0.0837283	53	0.995912	0.00383212
4_15574221	AT4G32260	AT4G32260.1	AT4G32260	-	T	C	0.0019101	30	0.745874	0.0914847
4_15576244	AT4G32270	AT4G32270.1	AT4G32270	-	T	C	0.066482	24	2.39581	0.00424234
4_15669517	AT4G32470	AT4G32470.1,AT4G32470.2	QCR7-1	-	T	C	0.0481144	74	0.502835	0.0391586
4_15671035	AT4G32470	AT4G32470.1,AT4G32470.2	QCR7-1	-	T	C	0.00513196	28	0.337697	0.0108255
4_15693763	AT4G32530	AT4G32530.1,AT4G32530.2	VHA-c''1	-	T	C	0.0635261	89	0.597405	0.00182108
4_15717131	AT4G32570	AT4G32570.1,AT4G32570.2	TIFY8	-	T	C	0.0208901	23	1.16584	0.0599816
4_15789218	AT4G32720	AT4G32720.1,AT4G32720.2	LA1	+	A	G	0.0614195	135	0.136531	0.0990967
4_16039120	AT4G33250	AT4G33250.1	TIF3K1	-	T	C	0.197121	534	0.583729	1.38034e-10
4_16039122	AT4G33250	AT4G33250.1	TIF3K1	-	T	C	0.116296	324	0.713151	1.05798e-06
4_16039125	AT4G33250	AT4G33250.1	TIF3K1	-	T	C	0.0228758	63	0.718108	0.0713811
4_16073944	AT4G33380	AT4G33380.1,AT4G33380.2	AT4G33380	+	A	G	0.0232816	42	1.62727	0.00952362
4_16119770	AT4G33520	AT4G33520.1,AT4G33520.2,AT4G33520.4,AT4G33520.3	PAA1	+	A	G	0.0946418	461	0.685271	4.56528e-06
4_16171846	AT4G33680	AT4G33680.1	DAP	-	T	C	0.169417	308	0.498948	1.10495e-07
4_16172324	AT4G33680	AT4G33680.1	DAP	-	T	C	0.0669443	209	0.700788	7.47831e-09
4_16172325	AT4G33680	AT4G33680.1	DAP	-	T	C	0.106336	334	0.582898	1.99943e-10
4_16270198	AT4G33945	AT4G33945.1	AT4G33945	+	A	G	0.166159	109	0.399426	0.0248397
4_16336815	AT4G34110	AT4G34110.1	PAB2	+	A	G	0.00381388	25	1.09044	0.0854621
4_16336921	AT4G34110	AT4G34110.1	PAB2	+	A	G	0.040617	316	0.5824	3.80308e-07
4_16337237	AT4G34110	AT4G34110.1	PAB2	+	A	G	0.0130123	87	0.509551	0.00765736
4_16337578	AT4G34110	AT4G34110.1	PAB2	+	A	G	0.0170358	70	0.417672	0.015703
4_16337663	AT4G34110	AT4G34110.1	PAB2	+	A	G	0.0197719	104	0.661989	0.00144581
4_16337760	AT4G34110	AT4G34110.1	PAB2	+	A	G	0.0285529	132	0.541441	0.0392584
4_16337869	AT4G34110	AT4G34110.1	PAB2	+	A	G	0.0151775	62	0.513764	0.00986205
4_16337870	AT4G34110	AT4G34110.1	PAB2	+	A	G	0.0278363	119	0.549867	5.88897e-05
4_16338016	AT4G34110	AT4G34110.1	PAB2	+	A	G	0.026091	113	0.831334	9.61506e-05
4_16338119	AT4G34110	AT4G34110.1	PAB2	+	A	G	0.00351779	26	0.881118	0.0105126
4_16338156	AT4G34110	AT4G34110.1	PAB2	+	A	G	0.00684288	51	0.461536	0.0277026
4_16338513	AT4G34110	AT4G34110.1	PAB2	+	A	G	0.00680658	36	0.654862	0.00735134
4_16338526	AT4G34110	AT4G34110.1	PAB2	+	A	G	0.00679273	37	0.334263	0.0255608
4_16338809	AT4G34110	AT4G34110.1	PAB2	+	A	G	0.00544617	26	1.47624	0.087665
4_16338898	AT4G34110	AT4G34110.1	PAB2	+	A	G	0.0434559	253	0.527732	9.83759e-08
4_16339189	AT4G34110	AT4G34110.1	PAB2	+	A	G	0.0460132	292	0.673228	4.34623e-10
4_16339274	AT4G34110	AT4G34110.1	PAB2	+	A	G	0.0104124	76	0.768027	0.00520228
4_16339569	AT4G34110	AT4G34110.1	PAB2	+	A	G	0.397771	3105	0.374186	4.90562e-17
4_16339580	AT4G34110	AT4G34110.1	PAB2	+	A	G	0.0132287	91	0.9115	0.000234706
4_16339582	AT4G34110	AT4G34110.1	PAB2	+	A	G	0.0201991	140	0.867113	7.28524e-07
4_16339693	AT4G34110	AT4G34110.1	PAB2	+	A	G	0.00410136	28	2.40617	0.00120321
4_16339708	AT4G34110	AT4G34110.1	PAB2	+	A	G	0.0827754	544	0.609695	2.72681e-09
4_16339804	AT4G34110	AT4G34110.1	PAB2	+	A	G	0.438453	1610	0.429786	9.96849e-16
4_16339882	AT4G34110	AT4G34110.1	PAB2	+	A	G	0.00554593	16	3.78223	0.0254032
4_16341952	AT4G34120	AT4G34120.1	CBSX2	+	A	G	0.105865	287	0.611661	7.86933e-07
4_16372672	AT4G34190	AT4G34190.1	SEP1	-	T	C	0.00961898	103	0.647523	0.00660736
4_16391471	AT4G34240	AT4G34240.1,AT4G34240.2,AT4G34240.4,AT4G34240.3	ALDH3I1	+	A	G	0.0583058	53	1.0455	0.00179819
4_16403457	AT4G34265	AT4G34265.2,AT4G34265.1,AT4G34265.3	AT4G34265	+	A	G	0.0988	247	0.341778	0.0105001
4_16405052	AT4G34270	AT4G34270.1	AT4G34270	-	T	C	0.112211	68	0.720983	0.078808
4_16430134	AT4G34350	AT4G34350.1	ISPH	-	T	C	0.00647642	32	0.878842	0.00898837
4_16476675	AT4G34450	AT4G34450.1	AT4G34450	+	A	G	0.0262383	98	1.01609	5.86194e-06
4_16476814	AT4G34450	AT4G34450.1	AT4G34450	+	A	G	0.0824342	191	0.954557	2.55991e-07
4_16476846	AT4G34450	AT4G34450.1	AT4G34450	+	A	G	0.103218	170	0.931346	1.79006e-09
4_16484855	AT4G34490	AT4G34490.1,AT4G34490.2	CAP1	-	T	C	0.028866	28	0.522442	0.0942498
4_16534947	AT4G34620	AT4G34620.1	SSR16	-	T	C	0.0504444	227	0.590093	0.000136839
4_16534948	AT4G34620	AT4G34620.1	SSR16	-	T	C	0.00378878	16	3.05327	0.00215114
4_16534992	AT4G34620	AT4G34620.1	SSR16	-	T	C	0.00410644	25	1.3876	0.0210948
4_16535036	AT4G34620	AT4G34620.1	SSR16	-	T	C	0.020989	236	0.509252	0.000681284
4_16535059	AT4G34620	AT4G34620.1	SSR16	-	T	C	0.00290826	46	0.767023	0.0084452
4_16535060	AT4G34620	AT4G34620.1	SSR16	-	T	C	0.00188287	29	1.26746	0.0493523
4_16535085	AT4G34620	AT4G34620.1	SSR16	-	T	C	0.0112294	230	0.410164	0.0120352
4_16535095	AT4G34620	AT4G34620.1	SSR16	-	T	C	0.00443421	104	0.605559	0.00715407
4_16535133	AT4G34620	AT4G34620.1	SSR16	-	T	C	0.00217506	62	1.02234	0.000444894
4_16535142	AT4G34620	AT4G34620.1	SSR16	-	T	C	0.0019241	58	0.682841	0.00220149
4_16535159	AT4G34620	AT4G34620.1	SSR16	-	T	C	0.0817591	2731	0.378192	4.48551e-09
4_16535174	AT4G34620	AT4G34620.1	SSR16	-	T	C	0.0201693	765	0.576414	1.67615e-13
4_16535177	AT4G34620	AT4G34620.1	SSR16	-	T	C	0.00391238	152	0.297608	0.0710298
4_16535203	AT4G34620	AT4G34620.1	SSR16	-	T	C	0.00130219	50	0.784973	0.00497371
4_16535237	AT4G34620	AT4G34620.1	SSR16	-	T	C	0.00300908	113	0.57238	0.00110338
4_16535845	AT4G34620	AT4G34620.1	SSR16	-	T	C	0.0423723	1859	0.347019	3.42324e-10
4_16535855	AT4G34620	AT4G34620.1	SSR16	-	T	C	0.00142898	60	0.198731	0.0520742
4_16535858	AT4G34620	AT4G34620.1	SSR16	-	T	C	0.000311154	13	1.3419	0.0743129
4_16535967	AT4G34620	AT4G34620.1	SSR16	-	T	C	0.00930851	406	0.264176	0.000619749
4_16536055	AT4G34620	AT4G34620.1	SSR16	-	T	C	0.00155646	31	1.50483	0.00436482
4_16541697	AT4G34640	AT4G34640.1,AT4G34640.2	SQS1	+	A	G	0.129213	92	1.05655	7.15961e-07
4_16541728	AT4G34640	AT4G34640.1,AT4G34640.2	SQS1	+	A	G	0.0925926	55	0.675275	0.0464181
4_16558574	AT4G34700	AT4G34700.1	CIB22	+	A	G	0.00480677	25	1.32685	0.00882461
4_16558578	AT4G34700	AT4G34700.1	CIB22	+	A	G	0.139949	708	0.475746	2.52519e-10
4_16558580	AT4G34700	AT4G34700.1	CIB22	+	A	G	0.0214041	100	0.849226	7.36374e-06
4_16558584	AT4G34700	AT4G34700.1	CIB22	+	A	G	0.115908	588	0.0781584	0.01787
4_16558590	AT4G34700	AT4G34700.1	CIB22	+	A	G	0.00369458	18	2.24839	0.00198428
4_16558591	AT4G34700	AT4G34700.1	CIB22	+	A	G	0.101346	482	0.106584	0.0195966
4_16558612	AT4G34700	AT4G34700.1	CIB22	+	A	G	0.0601347	259	0.155133	0.057348
4_16558619	AT4G34700	AT4G34700.1	CIB22	+	A	G	0.0196078	83	0.670148	0.000186266
4_16558626	AT4G34700	AT4G34700.1	CIB22	+	A	G	0.0574137	218	0.450244	0.0477614
4_16558627	AT4G34700	AT4G34700.1	CIB22	+	A	G	0.263866	980	0.159416	3.82259e-06
4_16560677	AT4G34710	AT4G34710.1,AT4G34710.2	SPE2	-	T	C	0.00354377	27	1.24645	0.0162298
4_16568197	AT4G34720	AT4G34720.1,AT4G34720.2	VHA-C3	-	T	C	0.0273973	102	0.230785	0.0278352
4_16568198	AT4G34720	AT4G34720.1,AT4G34720.2	VHA-C3	-	T	C	0.0353457	137	0.260033	0.041309
4_16673165	AT4G35020	AT4G35020.1,AT4G35020.4	ARAC3	+	A	G	0.027972	16	1.25536	0.00887923
4_16709720	AT4G35100	AT4G35100.1,AT4G35100.2	PIP2-7	+	A	G	0.00802169	145	0.46359	0.055434
4_16772889	AT4G35250	AT4G35250.1	AT4G35250	-	T	C	0.0119183	42	0.830742	0.0705187
4_17129822	AT4G36195	AT4G36195.1,AT4G36195.2	AT4G36195	+	A	G	0.144385	27	0.927865	0.0237762
4_17329859	AT4G36760	AT4G36760.1,AT4G36760.3,AT4G36760.2	ATAPP1	+	A	G	0.157428	71	1.25959	0.00010723
4_17341193	AT4G36800	AT4G36800.1,AT4G36800.2	RCE1	-	T	C	0.01359	12	1.75344	0.0307106
4_17341314	AT4G36800	AT4G36800.1,AT4G36800.2	RCE1	-	T	C	0.0354046	49	1.27455	0.00137647
4_17510984	AT4G37200	AT4G37200.1	HCF164	-	T	C	0.069594	84	0.491403	0.0315669
4_17541988	AT4G37270	AT4G37270.1	HMA1	-	T	C	0.0538117	12	1.49685	0.0118336
4_17542048	AT4G37270	AT4G37270.1	HMA1	-	T	C	0.161468	88	0.391092	0.0638792
4_17788260	AT4G37830	AT4G37830.1,AT4G37830.2,AT4G37830.3	COX6A	-	T	C	0.00172633	19	1.63721	0.0691931
4_17826373	AT4G37910	AT4G37910.1,AT4G37910.2	HSP70-9	-	T	C	0.0125362	13	1.90664	0.041557
4_17832186	AT4G37930	AT4G37930.1	SHM1	-	T	C	0.00474064	69	0.853265	0.0220362
4_17833541	AT4G37930	AT4G37930.1	SHM1	-	T	C	0.00668124	110	0.840279	0.00638179
4_17970183	AT4G38370	AT4G38370.1	AT4G38370	-	T	C	0.0560272	33	1.54924	0.00150548
4_18011318	AT4G38510	AT4G38510.5,AT4G38510.1	VHA-B2	-	T	C	0.0548523	104	0.223583	0.0463354
4_18012304	AT4G38510	AT4G38510.5,AT4G38510.1	VHA-B2	-	T	C	0.0367836	43	1.10016	0.0652183
4_18097303	AT4G38770	AT4G38770.1	PRP4	-	T	C	0.0028169	19	-1.03961	0.049539
4_18113389	AT4G38800	AT4G38800.1	MTN1	-	T	C	0.027027	31	1.01181	0.0594911
4_18148330	AT4G38920	AT4G38920.1,AT4G38920.2	VHA-C3	+	A	G	0.0118135	74	0.457198	0.0309911
4_18148741	AT4G38920	AT4G38920.1,AT4G38920.2	VHA-C3	+	A	G	0.0311751	195	0.495172	0.000192599
4_18148858	AT4G38920	AT4G38920.1,AT4G38920.2	VHA-C3	+	A	G	0.0180072	75	1.00039	0.000659838
4_18149000	AT4G38920	AT4G38920.1,AT4G38920.2	VHA-C3	+	A	G	0.0201207	50	0.951181	0.0430807
4_18149001	AT4G38920	AT4G38920.1,AT4G38920.2	VHA-C3	+	A	G	0.0476002	120	0.91954	5.96435e-06
4_18149004	AT4G38920	AT4G38920.1,AT4G38920.2	VHA-C3	+	A	G	0.0678862	167	0.561238	0.000176372
4_18213737	AT4G39080	AT4G39080.1	VHA-A3	+	A	G	0.130268	102	0.5766	0.0110771
4_18257578	AT4G39200	AT4G39200.1,AT4G39200.2	RPS25E	+	A	G	0.0182676	244	0.296029	0.0015143
4_18257834	AT4G39200	AT4G39200.1	RPS25E	+	A	G	0.00836515	195	0.30158	0.0193
4_18258389	AT4G39200	AT4G39200.1,AT4G39200.2	RPS25E	+	A	G	0.0593094	998	0.203736	1.08973e-06
4_18258390	AT4G39200	AT4G39200.1,AT4G39200.2	RPS25E	+	A	G	0.0177526	288	0.276908	0.00240525
4_18258398	AT4G39200	AT4G39200.1,AT4G39200.2	RPS25E	+	A	G	0.00829684	108	0.491118	0.0106509
4_18258457	AT4G39200	AT4G39200.1,AT4G39200.2	RPS25E	+	A	G	0.0241835	234	0.199948	0.0131142
4_18356099	AT4G39460	AT4G39460.1,AT4G39460.2,AT4G39460.3	SAMC1	-	T	C	0.0666032	70	0.416355	0.0715539
4_18356358	AT4G39460	AT4G39460.1,AT4G39460.2,AT4G39460.3	SAMC1	-	T	C	0.0339761	74	0.525535	0.00942797
4_18414907	AT4G39680	AT4G39680.1,AT4G39680.2	AT4G39680	-	T	C	0.402503	386	0.299257	6.19777e-06
4_18415237	AT4G39680	AT4G39680.1,AT4G39680.2	AT4G39680	-	T	C	0.163265	112	0.269309	0.0601442
5_145849	AT5G01350	AT5G01350.1	AT5G01350	-	T	C	0.00630252	18	0.762358	0.0891269
5_209228	AT5G01530	AT5G01530.1	LHCB4.1	+	A	G	0.0194036	881	0.349396	1.19519e-06
5_209497	AT5G01530	AT5G01530.1	LHCB4.1	+	A	G	0.00331445	141	0.191594	0.00920975
5_209503	AT5G01530	AT5G01530.1	LHCB4.1	+	A	G	0.0209289	990	0.310226	3.30199e-07
5_209564	AT5G01530	AT5G01530.1	LHCB4.1	+	A	G	0.0108318	505	0.238801	0.0327127
5_209573	AT5G01530	AT5G01530.1	LHCB4.1	+	A	G	0.00214209	102	0.250607	0.00928737
5_209906	AT5G01530	AT5G01530.1	LHCB4.1	+	A	G	0.00164477	81	0.129465	0.0204548
5_209972	AT5G01530	AT5G01530.1	LHCB4.1	+	A	G	0.0179911	950	0.359956	5.49145e-08
5_210163	AT5G01530	AT5G01530.1	LHCB4.1	+	A	G	0.00186069	69	0.404365	0.0121616
5_210266	AT5G01530	AT5G01530.1	LHCB4.1	+	A	G	0.00852708	128	0.645194	0.0309456
5_226651	AT5G01590	AT5G01590.1	TIC56	+	A	G	0.0825611	196	0.616049	3.62851e-06
5_451549	AT5G02240	AT5G02240.1	AT5G02240	+	A	G	0.026886	67	0.919655	0.0343385
5_452272	AT5G02240	AT5G02240.1	AT5G02240	+	A	G	0.0125267	94	0.453839	0.0131142
5_534384	AT5G02450	AT5G02450.1	RPL36C	+	A	G	0.00925794	65	0.480604	0.0145056
5_534387	AT5G02450	AT5G02450.1	RPL36C	+	A	G	0.0315014	231	0.354189	9.11424e-05
5_534390	AT5G02450	AT5G02450.1	RPL36C	+	A	G	0.0241821	170	0.121833	0.0751212
5_554091	AT5G02500	AT5G02500.1,AT5G02500.2	MED37E	-	T	C	0.00279871	39	0.886385	0.0946811
5_554194	AT5G02500	AT5G02500.1,AT5G02500.2	MED37E	-	T	C	0.00561969	92	0.928363	0.000254788
5_554298	AT5G02500	AT5G02500.1,AT5G02500.2	MED37E	-	T	C	0.0174149	308	0.427076	0.000127641
5_554311	AT5G02500	AT5G02500.1,AT5G02500.2	MED37E	-	T	C	0.00627475	103	0.696544	0.00163389
5_554833	AT5G02500	AT5G02500.1,AT5G02500.2	MED37E	-	T	C	0.00443613	64	0.373364	0.0565605
5_555436	AT5G02500	AT5G02500.1,AT5G02500.2	MED37E	-	T	C	0.0203919	154	0.92615	7.65682e-05
5_556160	AT5G02500	AT5G02500.1,AT5G02500.2	MED37E	-	T	C	0.0014485	27	1.29551	0.0291388
5_5448971	AT5G02565	AT5G02565.1	NA	+	A	G	0.0866983	73	1.32988	1.88788e-06
5_5449059	AT5G02565	AT5G02565.1	NA	+	A	G	0.145318	135	0.592987	0.00137485
5_5449116	AT5G02565	AT5G02565.1	NA	+	A	G	0.457778	412	0.446555	2.22072e-05
5_5449318	AT5G02575	AT5G02575.1	NA	+	A	G	0.0618557	66	1.75592	7.45277e-05
5_5449324	AT5G02575	AT5G02575.1	NA	+	A	G	0.0163488	18	1.49984	0.0710298
5_5449415	AT5G02575	AT5G02575.1	NA	+	A	G	0.212658	252	0.6074	7.81461e-06
5_5449456	AT5G02575	AT5G02575.1	NA	+	A	G	0.107774	122	0.41156	0.021995
5_588541	AT5G02610	AT5G02610.1,AT5G02610.2	RPL35D	+	A	G	0.00848485	28	1.30305	0.0432833
5_634196	AT5G02790	AT5G02790.1	GSTL3	+	A	G	0.016622	62	0.185419	0.0320919
5_658310	AT5G02870	AT5G02870.1,AT5G02870.2	RPL4D	+	A	G	0.0241245	186	0.286588	0.0938095
5_658856	AT5G02870	AT5G02870.1,AT5G02870.2	RPL4D	+	A	G	0.00272134	30	1.17388	0.00996374
5_659482	AT5G02870	AT5G02870.1,AT5G02870.2	RPL4D	+	A	G	0.0109079	102	0.540569	0.0823699
5_659518	AT5G02870	AT5G02870.1,AT5G02870.2	RPL4D	+	A	G	0.00409889	32	1.26688	0.0832538
5_693264	AT5G02960	AT5G02960.1	RPS23B	-	T	C	0.0107404	75	0.540988	0.00216331
5_693276	AT5G02960	AT5G02960.1	RPS23B	-	T	C	0.0382459	266	0.299041	0.0456595
5_693280	AT5G02960	AT5G02960.1	RPS23B	-	T	C	0.0137306	106	0.424592	0.0495791
5_693341	AT5G02960	AT5G02960.1	RPS23B	-	T	C	0.00411523	53	0.579305	0.0543169
5_795892	AT5G03290	AT5G03290.1	IDH5	+	A	G	0.0405286	46	0.307625	0.0365234
5_815431	AT5G03345	AT5G03345.1,AT5G03345.2	AT5G03345	+	A	G	0.0232558	33	0.79327	0.0499522
5_815517	AT5G03345	AT5G03345.1,AT5G03345.2	AT5G03345	+	A	G	0.101064	38	1.70587	3.18348e-05
5_825705	AT5G03370	AT5G03370.1	AT5G03370	-	T	C	0.320896	43	0.757004	0.0822798
5_864053	AT5G03455	AT5G03455.1,AT5G03455.2	CDC25	+	A	G	0.139785	13	1.60037	0.0704854
5_939800	AT5G03660	AT5G03660.1,AT5G03660.3,AT5G03660.2	AT5G03660	+	A	G	0.123167	42	0.657539	0.0627285
5_1028504	AT5G03850	AT5G03850.1	RPS28A	-	T	C	0.247046	2007	0.144374	5.68283e-06
5_1041305	AT5G03880	AT5G03880.1	AT5G03880	-	T	C	0.0168664	38	1.302	0.00984236
5_1061213	AT5G03940	AT5G03940.1	FFC	-	T	C	0.018245	42	1.24464	0.0253829
5_1122053	AT5G04130	AT5G04130.1,AT5G04130.2	GYRBM	-	T	C	0.102041	40	0.716313	0.0861756
5_1195026	AT5G04280	AT5G04280.1,AT5G04280.2	RZ1C	+	A	G	0.0257634	54	0.972676	0.0117522
5_1319518	AT5G04590	AT5G04590.1	SIR	+	A	G	0.0110353	76	0.488045	0.0609751
5_1322036	AT5G04590	AT5G04590.1	SIR	+	A	G	0.175942	1195	0.470508	8.92621e-11
5_1359255	AT5G04710	AT5G04710.1	AT5G04710	-	T	C	0.0429082	36	1.07559	0.00695943
5_1389347	AT5G04800	AT5G04800.1,AT5G04800.2,AT5G04800.3,AT5G04800.4	RPS17D	+	A	G	0.011236	134	0.392884	0.000218977
5_1389547	AT5G04800	AT5G04800.1,AT5G04800.2,AT5G04800.3,AT5G04800.4	RPS17D	+	A	G	0.0828215	445	0.413259	1.23078e-07
5_1389638	AT5G04800	AT5G04800.1,AT5G04800.2,AT5G04800.3,AT5G04800.4	RPS17D	+	A	G	0.0198377	66	0.472963	0.0490338
5_1389666	AT5G04800	AT5G04800.1,AT5G04800.2,AT5G04800.3,AT5G04800.4	RPS17D	+	A	G	0.036941	114	0.545364	0.00765153
5_1426628	AT5G04885	AT5G04885.2,AT5G04885.1	AT5G04885	+	A	G	0.173669	62	0.580835	0.0195323
5_1478949	AT5G05010	AT5G05010.1,AT5G05010.2	AT5G05010	+	A	G	0.0311486	48	0.804753	0.00254385
5_1479913	AT5G05010	AT5G05010.1,AT5G05010.2	AT5G05010	+	A	G	0.0204499	20	1.31968	0.054625
5_1494490	AT5G05060	AT5G05060.1	AT5G05060	-	T	C	0.0115191	16	1.43786	0.0171816
5_1494503	AT5G05060	AT5G05060.1	AT5G05060	-	T	C	0.0310918	43	0.523549	0.0744757
5_1494853	AT5G05060	AT5G05060.1	AT5G05060	-	T	C	0.0121107	21	0.911619	0.0881591
5_1494871	AT5G05060	AT5G05060.1	AT5G05060	-	T	C	0.0667461	112	0.600998	0.00791105
5_1724177	AT5G05740	AT5G05740.2,AT5G05740.3,AT5G05740.1	EGY2	-	T	C	0.0362903	81	0.781771	0.0018837
5_1724534	AT5G05740	AT5G05740.2,AT5G05740.3,AT5G05740.1	EGY2	-	T	C	0.021645	30	0.493187	0.0575825
5_1725401	AT5G05740	AT5G05740.2,AT5G05740.3,AT5G05740.1	EGY2	-	T	C	0.0076461	14	0.836566	0.068448
5_1920954	AT5G06290	AT5G06290.1,AT5G06290.2	2-Cys Prx B	+	A	G	0.00528169	36	0.956434	0.00372486
5_1936651	AT5G06340	AT5G06340.1	NUDT27	+	A	G	0.117446	480	0.545246	2.19783e-14
5_1936680	AT5G06340	AT5G06340.1	NUDT27	+	A	G	0.0171831	61	0.799944	0.0505184
5_2180708	AT5G07020	AT5G07020.1	AT5G07020	-	T	C	0.00548509	16	2.44285	0.0777898
5_2180944	AT5G07020	AT5G07020.1	AT5G07020	-	T	C	0.0232951	138	0.976231	3.32498e-08
5_2319407	AT5G07340	AT5G07340.1,AT5G07340.2	AT5G07340	+	A	G	0.0439739	27	0.487087	0.0185086
5_2321099	AT5G07350	AT5G07350.1,AT5G07350.2	Tudor1	-	T	C	0.171789	313	0.376844	0.00165537
5_2543413	AT5G07960	AT5G07960.1	AT5G07960	+	A	G	0.22973	68	0.442534	0.0542652
5_2565329	AT5G08000	AT5G08000.1,AT5G08000.2	PDCB2	+	A	G	0.0213144	12	1.60234	0.0727346
5_2582194	AT5G08060	AT5G08060.1	AT5G08060	+	A	G	0.0174591	47	1.1974	0.000172009
5_2582216	AT5G08060	AT5G08060.1	AT5G08060	+	A	G	0.0112753	29	1.02341	0.0696841
5_2711435	AT5G08415	AT5G08415.1	LIP1P	-	T	C	0.0352349	21	1.22186	0.00532129
5_2728497	AT5G08450	AT5G08450.1,AT5G08450.2,AT5G08450.3	AT5G08450	-	T	C	0.033033	11	0.656547	0.0900222
5_2794048	AT5G08610	AT5G08610.1	RH26	+	A	G	0.346314	249	0.49568	0.000224985
5_2794096	AT5G08610	AT5G08610.1	RH26	+	A	G	0.103397	70	0.746011	0.00919881
5_2818396	AT5G08670	AT5G08670.1	AT5G08670	-	T	C	0.00639386	15	1.83783	0.0555803
5_2818412	AT5G08670	AT5G08670.1	AT5G08670	-	T	C	0.100316	254	0.376394	3.04213e-07
5_2822400	AT5G08680	AT5G08680.1	AT5G08680	+	A	G	0.0148831	21	1.91937	0.0224355
5_2955520	AT5G09510	AT5G09510.1,AT5G09510.2	RPS15D	-	T	C	0.0746667	28	1.64598	0.00848933
5_2956398	AT5G09510	AT5G09510.1,AT5G09510.2	RPS15D	-	T	C	0.0123273	141	0.229519	0.0126682
5_2991400	AT5G09650	AT5G09650.1	PPA6	-	T	C	0.0031348	16	1.80384	0.0446339
5_2991552	AT5G09650	AT5G09650.1	PPA6	-	T	C	0.00801727	52	1.05416	4.9327e-05
5_2993026	AT5G09650	AT5G09650.1	PPA6	-	T	C	0.0730633	680	0.469645	1.526e-08
5_2993615	AT5G09660	AT5G09660.1,AT5G09660.4,AT5G09660.5,AT5G09660.3,AT5G09660.2	PMDH2	-	T	C	0.0132554	102	0.853974	0.000406217
5_2994177	AT5G09660	AT5G09660.1,AT5G09660.4,AT5G09660.5,AT5G09660.3,AT5G09660.2	PMDH2	-	T	C	0.0203439	265	0.340566	0.00071643
5_3035169	AT5G09770	AT5G09770.1	AT5G09770	-	T	C	0.143243	53	0.799588	0.00366322
5_3053939	AT5G09810	AT5G09810.1	ACT7	+	A	G	0.0335309	215	0.184046	0.067273
5_3083121	AT5G09880	AT5G09880.1	AT5G09880	-	T	C	0.121212	48	0.610461	0.0681258
5_3089534	AT5G09900	AT5G09900.1,AT5G09900.3,AT5G09900.2	RPN5A	-	T	C	0.0114601	27	0.862228	0.0645005
5_3179239	AT5G10140	AT5G10140.1,AT5G10140.2,AT5G10140.4,AT5G10140.3	FLC	-	T	C	0.241573	86	0.872741	0.0339286
5_3196173	AT5G10180	AT5G10180.1	SULTR2;1	+	A	G	0.0336449	72	0.447394	0.0910079
5_3196769	AT5G10180	AT5G10180.1	SULTR2;1	+	A	G	0.087931	153	0.434579	0.0526139
5_3258794	AT5G10360	AT5G10360.1,AT5G10360.2	RPS6B	-	T	C	0.0171549	147	0.395206	0.0110403
5_3258877	AT5G10360	AT5G10360.1,AT5G10360.2	RPS6B	-	T	C	0.0272021	273	0.19495	0.0400912
5_3259237	AT5G10360	AT5G10360.1,AT5G10360.2	RPS6B	-	T	C	0.0348921	542	-0.00061688	0.0291139
5_3443876	AT5G10920	AT5G10920.1	T30N20_190	+	A	G	0.23917	265	0.234853	0.000154497
5_3465110	AT5G10960	AT5G10960.1	CAF1-10	+	A	G	0.0127092	41	0.747989	0.0290495
5_3556200	AT5G11170	AT5G11170.1,AT5G11170.2	RH15	+	A	G	0.0491032	167	0.752086	4.63002e-07
5_3556681	AT5G11170	AT5G11170.1,AT5G11170.2	RH15	+	A	G	0.0581741	137	0.222932	0.0358157
5_3570544	AT5G11200	AT5G11200.1,AT5G11200.2,AT5G11200.3	RH15	+	A	G	0.35128	933	0.102093	0.0125698
5_3570546	AT5G11200	AT5G11200.1,AT5G11200.2,AT5G11200.3	RH15	+	A	G	0.0442445	118	0.824885	4.89434e-05
5_3570571	AT5G11200	AT5G11200.1,AT5G11200.2,AT5G11200.3	RH15	+	A	G	0.260147	673	0.130951	3.12093e-07
5_3570685	AT5G11200	AT5G11200.1,AT5G11200.2,AT5G11200.3	RH15	+	A	G	0.293675	780	0.188313	2.71791e-05
5_3655717	AT5G11450	AT5G11450.2,AT5G11450.1	PPD5	+	A	G	0.00830204	42	0.816016	0.00726671
5_3670051	AT5G11480	AT5G11480.1	AT5G11480	-	T	C	0.263559	865	0.407583	1.29528e-21
5_3670058	AT5G11480	AT5G11480.1	AT5G11480	-	T	C	0.0196839	66	0.844687	0.000262687
5_3791276	AT5G11770	AT5G11770.1	AT5G11770	-	T	C	0.0279588	133	0.469417	0.00357987
5_3791311	AT5G11770	AT5G11770.1	AT5G11770	-	T	C	0.158387	711	0.176763	0.034299
5_3792530	AT5G11770	AT5G11770.1	AT5G11770	-	T	C	0.295195	903	0.291962	8.61736e-05
5_3923142	AT5G12140	AT5G12140.1	CYS1	-	T	C	0.379648	1164	0.163566	0.00917473
5_3923821	AT5G12140	AT5G12140.1	CYS1	-	T	C	0.0085269	87	0.852374	0.00233028
5_4044937	AT5G12470	AT5G12470.1	AT5G12470	-	T	C	0.0110803	16	1.46239	0.0108896
5_4044946	AT5G12470	AT5G12470.1	AT5G12470	-	T	C	0.0402299	56	0.652922	0.0213678
5_4045367	AT5G12470	AT5G12470.1	AT5G12470	-	T	C	0.00837258	16	3.07035	0.00808999
5_4060021	AT5G12860	AT5G12860.1,AT5G12860.2	DIT1	-	T	C	0.0357424	136	0.64134	2.76442e-06
5_4060500	AT5G12860	AT5G12860.1,AT5G12860.2	DIT1	-	T	C	0.0476542	258	0.390905	0.00412884
5_4136246	AT5G13030	AT5G13030.1	AT5G13030	+	A	G	0.109821	123	0.410565	0.0611562
5_4226474	AT5G13240	AT5G13240.3,AT5G13240.2,AT5G13240.1	AT5G13240	-	T	C	0.0419287	40	1.34169	0.0210475
5_4310533	AT5G13450	AT5G13450.1,AT5G13450.2	ATP5	-	T	C	0.00374332	14	0.974121	0.0644255
5_4310549	AT5G13450	AT5G13450.1,AT5G13450.2	ATP5	-	T	C	0.0163731	79	0.736504	0.000147175
5_4311167	AT5G13450	AT5G13450.1,AT5G13450.2	ATP5	-	T	C	0.00595664	25	1.53054	0.022679
5_4387689	AT5G13630	AT5G13630.1,AT5G13630.2	CHLH	-	T	C	0.026936	240	0.529193	0.000297399
5_4472426	AT5G13850	AT5G13850.1	NACA3	+	A	G	0.298054	2022	0.474236	1.09678e-33
5_4472450	AT5G13850	AT5G13850.1	NACA3	+	A	G	0.0347174	199	0.847112	5.37674e-11
5_4472635	AT5G13850	AT5G13850.1	NACA3	+	A	G	0.0787304	191	0.508777	0.00020176
5_4530975	AT5G14040	AT5G14040.1	MPT3	-	T	C	0.0169199	49	1.21138	0.00943036
5_4531513	AT5G14040	AT5G14040.1	MPT3	-	T	C	0.0100149	74	1.48258	7.54439e-05
5_4538808	AT5G14060	AT5G14060.1,AT5G14060.3	AK2	+	A	G	0.00987654	16	0.899526	0.0178003
5_4538924	AT5G14060	AT5G14060.1,AT5G14060.3	AK2	+	A	G	0.0137478	23	1.38938	0.0319106
5_4617851	AT5G14320	AT5G14320.1,AT5G14320.2	RPS13	-	T	C	0.024958	208	0.418447	3.47704e-05
5_4617855	AT5G14320	AT5G14320.1,AT5G14320.2	RPS13	-	T	C	0.0137305	124	0.75623	0.000373418
5_4787540	AT5G14800	AT5G14800.1,AT5G14800.2	PROC1	-	T	C	0.00634921	16	1.37479	0.0952447
5_4800022	AT5G14840	AT5G14840.1	AT5G14840	-	T	C	0.0650558	35	1.45059	0.011949
5_4824007	AT5G14910	AT5G14910.1,AT5G14910.2	AT5G14910	+	A	G	0.00364964	34	0.263888	0.0899192
5_4824015	AT5G14910	AT5G14910.1,AT5G14910.2	AT5G14910	+	A	G	0.00885439	81	0.580937	0.0361273
5_4825283	AT5G14910	AT5G14910.1,AT5G14910.2	AT5G14910	+	A	G	0.0399361	50	0.63988	0.000979985
5_4889648	AT5G15090	AT5G15090.1,AT5G15090.2	VDAC3	-	T	C	0.140457	301	0.200886	0.0373318
5_4889875	AT5G15090	AT5G15090.1,AT5G15090.2	VDAC3	-	T	C	0.00740741	22	2.05681	0.000797284
5_4978633	AT5G15320	AT5G15320.1,AT5G15320.2	AT5G15320	+	A	G	0.0327533	128	0.366567	0.000992346
5_4978834	AT5G15320	AT5G15320.1,AT5G15320.2	AT5G15320	+	A	G	0.0363196	15	0.802116	0.0625813
5_4978835	AT5G15320	AT5G15320.1,AT5G15320.2	AT5G15320	+	A	G	0.215311	90	0.796778	1.84942e-07
5_4997019	AT5G15390	AT5G15390.1,AT5G15390.2	AT5G15390	+	A	G	0.0762852	46	0.442669	0.0499634
5_5018913	AT5G15460	AT5G15460.1,AT5G15460.3	MUB2	-	T	C	0.217949	34	0.578938	0.0402292
5_5039716	AT5G15530	AT5G15530.1	BCCP2	+	A	G	0.0148291	23	1.22551	0.0464398
[truncated: 392 more rows]

## Sheet: GENES ECT3 aerial
GENE	NAME	STRAND	TRANSCRIPTS	TPM	HITS	IDs	PROP	log2FC	p-adj	MISMATCH TYPE
AT1G01080	AT1G01080	-	AT1G01080.1,AT1G01080.3,AT1G01080.2	60.6504368,3.3033818,0.5194876	1	1_46478	0.0135	1.33	0.00332	T:C
AT1G01510	AN	+	AT1G01510.1	10.0815826	1	1_187341	0.0401	0.837	0.0423	A:G
AT1G01940	CYP18-1	+	AT1G01940.1	23.8678802	1	1_323793	0.0436	0.912	0.0473	A:G
AT1G02140	MEE63	-	AT1G02140.1	316.857928	1	1_404268	0.0177	0.42	0.033	T:C
AT1G02280	TOC33	-	AT1G02280.1,AT1G02280.2	64.3831474,NA	1	1_448700	0.00654	2.23	0.0584	T:C
AT1G02500	SAM1	+	AT1G02500.1,AT1G02500.2	121.7223908,NA	2	1_519351,1_519354	0.0569,0.00465	0.438,2.1	0.00756,0.0211	A:G,A:G
AT1G02560	CLPP5	+	AT1G02560.1	154.8197236	13	1_539818,1_539812,1_539832,1_539000,1_539790,1_539898,1_539412,1_539778,1_539799,1_539727,1_539643,1_539903,1_539007	0.241,0.0436,0.14,0.0145,0.0545,0.0194,0.0184,0.0108,0.0118,0.0064,0.00276,0.00939,0.00675	0.441,0.885,0.556,0.935,0.81,1.64,0.922,1.03,0.664,0.972,1.27,1.48,0.971	2.22e-10,8.89e-08,4.71e-07,2.56e-06,7.41e-06,0.00114,0.00225,0.00424,0.0129,0.0178,0.0183,0.024,0.0291	A:G,A:G,A:G,A:G,A:G,A:G,A:G,A:G,A:G,A:G,A:G,A:G,A:G
AT1G02780	RPL19A	-	AT1G02780.1	1092.2374224	4	1_608097,1_608073,1_608274,1_608110	0.0103,0.0253,0.00638,0.00409	0.579,0.269,0.146,0.681	5.42e-06,0.00782,0.00909,0.046	T:C,T:C,T:C,T:C
AT1G03600	PSB27-1	+	AT1G03600.1	677.179411	1	1_899332	0.00516	0.536	0.0305	A:G
AT1G03630	PORC	+	AT1G03630.1,AT1G03630.2	85.913452,2.5836296	1	1_908185	0.0291	0.623	0.000267	A:G
AT1G03680	ATHM1	-	AT1G03680.1	272.3250656	1	1_916909	0.0593	0.876	0.0648	T:C
AT1G03860	PHB2	-	AT1G03860.1,AT1G03860.2	51.5143638,0	1	1_979517	0.0181	1.41	0.0628	T:C
AT1G04080	PRP39	+	AT1G04080.1,AT1G04080.3,AT1G04080.2,AT1G04080.5	10.2794736,1.1824338,0.1785406,0	3	1_1056203,1_1056212,1_1056269	0.191,0.0459,0.15	0.742,1.24,0.645	5.6e-05,0.00216,0.0674	A:G,A:G,A:G
AT1G04170	EIF2 GAMMA	+	AT1G04170.1,AT1G04170.2	35.0668822,NA	2	1_1099473,1_1097474	0.0128,0.00534	1.25,1.5	0.00291,0.0431	A:G,A:G
AT1G04270	RPS15A	-	AT1G04270.1,AT1G04270.2	993.5756036,0.1590692	4	1_1141834,1_1141982,1_1142045,1_1142748	0.0462,0.0683,0.00531,0.00491	0.384,0.256,0.632,0.354	5.69e-11,7.48e-10,0.000177,0.017	T:C,T:C,T:C,T:C
AT1G04420	AT1G04420	+	AT1G04420.1	37.5295844	4	1_1193471,1_1192829,1_1193585,1_1191647	0.0831,0.0322,0.0636,0.0261	1.1,1.27,0.417,0.95	1.66e-07,2.62e-07,0.00854,0.0834	A:G,A:G,A:G,A:G
AT1G04480	RPL23C	+	AT1G04480.1	781.342957	3	1_1217225,1_1217263,1_1216482	0.0673,0.0482,0.0033	0.517,0.442,0.539	1.95e-14,1.29e-05,0.00133	A:G,A:G,A:G
AT1G04630	MEE4	-	AT1G04630.1	83.4386642	1	1_1290205	0.026	0.636	0.0179	T:C
AT1G04690	KAB1	+	AT1G04690.1	54.7156882	1	1_1315399	0.0947	0.475	0.00427	A:G
AT1G04710	KAT1	+	AT1G04710.1	7.0077566	1	1_1322652	0.155	1.02	0.0426	A:G
AT1G04810	RPN2B	+	AT1G04810.1	6.3603702	1	1_1354640	0.157	0.463	0.00345	A:G
AT1G04820	TUBA4	-	AT1G04820.1	200.7164134	1	1_1357584	0.00288	0.402	0.00592	T:C
AT1G04940	TIC20-I	+	AT1G04940.1	58.5220572	2	1_1399716,1_1400474	0.178,0.0169	0.486,1.76	1.34e-15,0.00296	A:G,A:G
AT1G05190	RPL6	-	AT1G05190.1	506.8888416	6	1_1503171,1_1502519,1_1502534,1_1502525,1_1502801,1_1503081	0.00564,0.0041,0.0316,0.0142,0.00283,0.00508	1.01,2.41,0.353,0.562,1.11,0.76	9.84e-05,0.00781,0.0166,0.0222,0.0288,0.0497	T:C,T:C,T:C,T:C,T:C,T:C
AT1G06690	AT1G06690	-	AT1G06690.1	21.5767722	1	1_2050538	0.0578	0.505	0.0485	T:C
AT1G06820	CRTISO	-	AT1G06820.1,AT1G06820.4,AT1G06820.2,AT1G06820.3	6.1372326,0.0554334,0.0506672,0.0471016	1	1_2095645	0.188	1.32	0.00262	T:C
AT1G07070	RPL35AA	+	AT1G07070.1	105.6257092	1	1_2169548	0.0453	1.02	0.00402	A:G
AT1G07180	NDA1	+	AT1G07180.1	30.4295148	1	1_2204786	0.0287	1.31	0.00552	A:G
AT1G07320	RPL4	+	AT1G07320.1,AT1G07320.3,AT1G07320.2	486.9406414,15.8290646,13.747593	2	1_2250403,1_2250183	0.0708,0.0203	0.814,0.241	0.00171,0.0469	A:G,A:G
AT1G07700	AT1G07700	+	AT1G07700.1,AT1G07700.3	37.0160048,0.024142	1	1_2380909	0.0545	0.802	0.00371	A:G
AT1G07770	RPS15AA	-	AT1G07770.1,AT1G07770.2,AT1G07770.3	1063.8873304,NA	2	1_2408490,1_2408686	0.00471,0.00803	0.377,0.291	0.0208,0.095	T:C,T:C
AT1G07890	APX1	+	AT1G07890.1,AT1G07890.6	400.7055922,4.132474	1	1_2439527	0.0116	0.321	0.00497	A:G
AT1G07920	A3	+	AT1G07920.1	259.1043746	1	1_2457149	0.19	0.298	4.65e-08	A:G
AT1G07930	A3	+	AT1G07930.1,AT1G07930.2	201.0324614,0.1985076	3	1_2460351,1_2460613,1_2460225	0.0223,0.0566,0.0022	0.246,0.274,0.573	0.000475,0.0207,0.0833	A:G,A:G,A:G
AT1G07940	A3	-	AT1G07940.1,AT1G07940.2,AT1G07940.3,AT1G07940.4	247.9195076,NA	2	1_2463255,1_2463316	0.0804,0.14	0.311,0.133	4.18e-05,0.0497	T:C,T:C
AT1G08040	AT1G08040	-	AT1G08040.1,AT1G08040.3	7.0079222,0.0889916	1	1_2496640	0.107	1.16	0.0123	T:C
AT1G08125	AT1G08125	-	AT1G08125.1,AT1G08125.3,AT1G08125.2,AT1G08125.4	9.4959548,0.1566518,0.1531204,0	1	1_2540150	0.0282	2.52	0.00319	T:C
AT1G08360	RPL10AA	+	AT1G08360.1	376.1445488	2	1_2637739,1_2637624	0.019,0.0143	1.09,0.0967	1.1e-07,0.0461	A:G,A:G
AT1G08380	PSAO	-	AT1G08380.1	6193.1156876	1	1_2641242	0.000806	0.49	0.0783	T:C
AT1G08640	CJD1	-	AT1G08640.1	64.6819278	2	1_2748602,1_2748575	0.0244,0.0252	1.35,1.04	0.018,0.0494	T:C,T:C
AT1G08780	AIP3	-	AT1G08780.1	60.704039	1	1_2809922	0.202	0.494	0.045	T:C
AT1G09130	CLPR3	-	AT1G09130.1,AT1G09130.3,AT1G09130.2	40.7174044,10.2989826,NA	3	1_2940058,1_2939784,1_2939823	0.0853,0.0164,0.112	0.641,2.36,0.211	9.75e-10,0.0179,0.0405	T:C,T:C,T:C
AT1G09140	SR30	-	AT1G09140.1,AT1G09140.2,AT1G09140.3	10.8400372,1.778023,0.1878766	2	1_2942847,1_2942768	0.117,0.133	0.6,0.742	0.0142,0.0851	T:C,T:C
AT1G09340	CSP41B	+	AT1G09340.1,AT1G09340.2	438.3929496,2.4513554	3	1_3017264,1_3018032,1_3018168	0.207,0.0974,0.0621	0.496,0.525,1.07	1.35e-05,0.000714,0.0257	A:G,A:G,A:G
AT1G09590	RPL21A	+	AT1G09590.1	655.8667208	2	1_3107611,1_3107503	0.25,0.0109	0.187,0.516	2.76e-06,0.00339	A:G,A:G
AT1G09620	AT1G09620	-	AT1G09620.1	16.736777	1	1_3114241	0.0264	1.81	0.00965	T:C
AT1G09690	RPL21A	-	AT1G09690.1	1622.8394028	1	1_3136657	0.00839	0.104	0.0919	T:C
AT1G09795	HISN1B	+	AT1G09795.1	31.9178522	1	1_3173773	0.0263	0.961	0.0141	A:G
AT1G10030	ERG28	+	AT1G10030.1	71.038511	1	1_3275607	0.0275	1.23	0.0661	A:G
AT1G10290	DRP2A	+	AT1G10290.1	9.5802792	1	1_3377049	0.147	0.469	0.0139	A:G
AT1G10310	AT1G10310	-	AT1G10310.1	17.0858656	2	1_3383331,1_3383328	0.146,0.066	0.957,0.929	1.27e-05,0.000104	T:C,T:C
AT1G10510	emb2004	+	AT1G10510.1	13.004685	3	1_3465064,1_3464214,1_3463847	0.0935,0.0354,0.055	0.727,0.701,1.01	0.000513,0.0419,0.0764	A:G,A:G,A:G
AT1G10522	AT1G10522	+	AT1G10522.1,AT1G10522.2	82.8797816,NA	1	1_3471166	0.0494	0.299	0.0015	A:G
AT1G10630	ATARFA1F	-	AT1G10630.1,AT1G10630.2	105.556191,NA	1	1_3513734	0.0557	0.43	0.000613	T:C
AT1G10670	ACLA-1	+	AT1G10670.1,AT1G10670.3	98.1167062,0.0629608	6	1_3537550,1_3536522,1_3538064,1_3536151,1_3538143,1_3537214	0.00799,0.0326,0.0134,0.0211,0.00946,0.00522	1.69,0.412,1.2,0.509,1.87,2.59	0.000749,0.00117,0.00174,0.00954,0.00984,0.0227	A:G,A:G,A:G,A:G,A:G,A:G
AT1G10830	Z-ISO	-	AT1G10830.1,AT1G10830.2,AT1G10830.3	10.7488764,0.343577,0.0454692	1	1_3605798	0.173	1.06	0.00413	T:C
AT1G10950	TMN1	+	AT1G10950.1	25.2216526	1	1_3663690	0.104	0.62	0.0102	A:G
AT1G11430	MORF9	+	AT1G11430.1	143.0634624	1	1_3848967	0.061	0.644	3.75e-05	A:G
AT1G11650	RBP45B	+	AT1G11650.2,AT1G11650.1	90.1927562,0.0174656	2	1_3917952,1_3917865	0.196,0.047	0.373,0.458	4.87e-14,2.83e-08	A:G,A:G
AT1G11720	SS3	+	AT1G11720.2,AT1G11720.1	2.3015764,0	1	1_3956761	0.104	1.57	0.00953	A:G
AT1G11840	ATGLX1	+	AT1G11840.6,AT1G11840.1,AT1G11840.5	234.640703,2.8084618,0.1281338	2	1_3997294,1_3997281	0.00128,0.0012	0.169,0.985	0.0337,0.0979	A:G,A:G
AT1G11860	GDCST	+	AT1G11860.3,AT1G11860.1	464.3246728,0	2	1_4003181,1_4003163	0.0132,0.00136	0.416,1.42	0.000936,0.0938	A:G,A:G
AT1G11870	ATSRS	+	AT1G11870.2,AT1G11870.1,AT1G11870.5,AT1G11870.4,AT1G11870.3,AT1G11870.6	8.3933106,1.469494,0.1271404,0.127003,0.1095116,0	1	1_4006603	0.106	1.29	0.0191	A:G
AT1G11930	AT1G11930	+	AT1G11930.2,AT1G11930.1	20.038205,0.1187348	1	1_4030382	0.476	0.238	0.0689	A:G
AT1G12000	PFP-BETA1	-	AT1G12000.1	40.1757468	3	1_4051896,1_4051894,1_4050650	0.0828,0.031,0.0965	0.526,0.777,0.339	0.000754,0.00709,0.0151	T:C,T:C,T:C
AT1G12230	AT1G12230	+	AT1G12230.1,AT1G12230.2	29.2457986,0.0322364	2	1_4150896,1_4150455	0.552,0.0288	0.825,0.721	0.00281,0.097	A:G,A:G
AT1G12410	CLPR2	+	AT1G12410.1	140.7325716	1	1_4224675	0.00819	0.563	0.00921	A:G
AT1G12800	AT1G12800	-	AT1G12800.1	29.1601998	2	1_4362221,1_4364008	0.109,0.0151	0.434,1.05	0.000322,0.0276	T:C,T:C
AT1G12840	VHA-C	+	AT1G12840.1	59.9041316	2	1_4378353,1_4375840	0.0274,0.0243	1.74,0.501	0.000543,0.0264	A:G,A:G
AT1G13060	PBE1	+	AT1G13060.1,AT1G13060.2	91.4565152,0.1754892	2	1_4454647,1_4454573	0.0198,0.0061	1.01,1.35	0.00498,0.0383	A:G,A:G
AT1G13560	AAPT1	-	AT1G13560.1,AT1G13560.3,AT1G13560.2	23.082582,0	1	1_4639127	0.272	0.382	0.000638	T:C
AT1G14320	RPL10A	+	AT1G14320.1,AT1G14320.2	1224.2544568,0.4152668	8	1_4889196,1_4889452,1_4888784,1_4889450,1_4889004,1_4889447,1_4889425,1_4888960	0.313,0.0456,0.049,0.0268,0.00292,0.00891,0.0049,0.00714	0.434,0.456,0.327,0.494,0.979,0.616,0.555,0.238	6.43e-14,2.45e-08,9.08e-07,0.000254,0.00496,0.00608,0.00791,0.00853	A:G,A:G,A:G,A:G,A:G,A:G,A:G,A:G
AT1G14400	UBC1	-	AT1G14400.1,AT1G14400.2	115.3217588,NA	1	1_4927311	0.133	0.671	6.14e-06	T:C
AT1G14450	AT1G14450	-	AT1G14450.2,AT1G14450.1	21.1001578,0	1	1_4947410	0.00805	0.508	0.0213	T:C
AT1G14610	VALRS	-	AT1G14610.1	9.190328	1	1_5008418	0.409	0.401	0.00434	T:C
AT1G14670	TMN2	+	AT1G14670.1	17.1819292	1	1_5040074	0.0913	0.619	0.000389	A:G
AT1G14810	AT1G14810	-	AT1G14810.1	45.5529314	1	1_5102730	0.0503	0.33	0.0484	T:C
AT1G14980	CPN10	-	AT1G14980.1,AT1G14980.2	836.5729306,0.188278	1	1_5166387	0.00815	0.138	0.0177	T:C
AT1G15120	AT1G15120	+	AT1G15120.2,AT1G15120.1	33.0922646,25.52528	2	1_5203757,1_5204011	0.0268,0.0306	0.363,1.03	3.65e-05,0.00193	A:G,A:G
AT1G15390	PDF1A	+	AT1G15390.1	28.8191088	1	1_5295576	0.19	0.269	0.0347	A:G
AT1G15500	AATP2	+	AT1G15500.1	54.1477458	3	1_5328499,1_5327405,1_5328503	0.0148,0.0149,0.0182	0.767,0.443,0.642	0.0165,0.0607,0.0972	A:G,A:G,A:G
AT1G15690	AVP1	+	AT1G15690.1,AT1G15690.2	117.3079978,0.0452226	2	1_5402225,1_5400785	0.0269,0.00713	0.45,0.899	0.0137,0.0386	A:G,A:G
AT1G15930	RPS12A	+	AT1G15930.1,AT1G15930.2	620.627405,NA	7	1_5472697,1_5472184,1_5472369,1_5472847,1_5472700,1_5472721,1_5472821	0.0066,0.0207,0.0112,0.00783,0.0156,0.00251,0.00819	0.602,0.0986,0.302,1.32,0.343,1.18,0.651	0.000747,0.000756,0.00234,0.0146,0.0231,0.0304,0.0376	A:G,A:G,A:G,A:G,A:G,A:G,A:G
AT1G16000	AT1G16000	+	AT1G16000.1	315.2765112	1	1_5495137	0.035	0.442	0.0261	A:G
AT1G16700	AT1G16700	+	AT1G16700.1	77.0114548	3	1_5711827,1_5711826,1_5711825	0.32,0.0744,0.124	0.754,1.29,0.685	3e-07,0.0183,0.0325	A:G,A:G,A:G
AT1G16810	AT1G16810	+	AT1G16810.1,AT1G16810.2,AT1G16810.3	93.4595136,NA	1	1_5756693	0.0409	0.721	0.0626	A:G
AT1G16880	ACR11	+	AT1G16880.1	133.1273658	2	1_5775926,1_5776072	0.0775,0.0181	0.412,0.343	0.0012,0.0911	A:G,A:G
AT1G16890	UBC36	-	AT1G16890.2,AT1G16890.3,AT1G16890.1	80.0937532,0.054832,0	1	1_5776442	0.521	0.264	0.00768	T:C
AT1G17220	FUG1	+	AT1G17220.1	26.5627332	1	1_5890188	0.0154	0.65	0.0549	A:G
AT1G17370	UBP1B	-	AT1G17370.1,AT1G17370.2	36.4479994,0.055081	1	1_5953231	0.00563	2.38	0.0585	T:C
AT1G17470	DRG1	+	AT1G17470.1,AT1G17470.2	25.2195488,NA	2	1_6004158,1_6005418	0.011,0.0143	1.69,1.06	0.00722,0.0694	A:G,A:G
AT1G17650	GLYR2	-	AT1G17650.1,AT1G17650.2	20.507252,0.0327408	2	1_6069864,1_6071838	0.107,0.0108	0.53,2.73	2.07e-06,0.0015	T:C,T:C
AT1G17720	PP2AB2	-	AT1G17720.2,AT1G17720.1	6.455336,3.1882452	1	1_6095893	0.0456	0.946	0.0608	T:C
AT1G17880	BTF3	-	AT1G17880.1	375.3926934	1	1_6153155	0.061	0.305	1.37e-06	T:C
AT1G18060	AT1G18060	-	AT1G18060.1	129.0627814	1	1_6213245	0.00513	2.86	0.00109	T:C
AT1G18070	AT1G18070	-	AT1G18070.1,AT1G18070.3	30.1922874,0.01699	3	1_6214379,1_6213978,1_6214076	0.162,0.232,0.0134	0.369,0.298,1.21	0.00148,0.0083,0.035	T:C,T:C,T:C
AT1G18080	RACK1A	+	AT1G18080.1	341.1147912	4	1_6223089,1_6223121,1_6223205,1_6223875	0.0604,0.0159,0.0092,0.0164	0.3,0.262,0.527,0.284	1.31e-09,0.00107,0.00225,0.0785	A:G,A:G,A:G,A:G
AT1G18450	ARP4	+	AT1G18450.1	18.2509954	1	1_6350148	0.157	0.316	0.00931	A:G
AT1G18540	RPL6A	-	AT1G18540.1	340.0935452	1	1_6377449	0.131	0.262	0.000287	T:C
AT1G19660	BBD2	-	AT1G19660.1,AT1G19660.3	28.2931778,0.0192692	1	1_6800177	0.0198	0.398	0.0971	T:C
AT1G19910	VHA-C2	+	AT1G19910.1,AT1G19910.2	167.8233314,8.1379942	1	1_6913508	0.0104	0.15	0.0846	A:G
AT1G20050	HYD1	+	AT1G20050.1	53.3377076	1	1_6949212	0.0786	0.024	0.0332	A:G
AT1G20200	RPN3A	-	AT1G20200.1	23.8032438	1	1_7001760	0.0184	2.19	0.000627	T:C
AT1G20340	DRT112	-	AT1G20340.1	5830.7258278	4	1_7043067,1_7042698,1_7042754,1_7042753	0.00242,0.0116,0.00338,0.00238	0.74,0.311,0.461,0.592	1.45e-05,9.55e-05,0.0363,0.07	T:C,T:C,T:C,T:C
AT1G20580	SMD3B	+	AT1G20580.1	150.5216462	2	1_7130425,1_7130517	0.0366,0.0214	0.882,2.66	0.0036,0.00865	A:G,A:G
AT1G20950	PFP-ALPHA1	-	AT1G20950.1	17.776913	1	1_7298241	0.0246	0.89	0.0986	T:C
AT1G21600	PTAC6	-	AT1G21600.1,AT1G21600.2	27.224169,NA	1	1_7572185	0.00965	2.06	0.0307	T:C
AT1G21690	RFC4	+	AT1G21690.1,AT1G21690.2,AT1G21690.4,AT1G21690.3	11.3908036,0.0111488,0.005861,0.6961996	2	1_7618353,1_7618295	0.12,0.1	1.38,0.697	8.37e-05,0.0514	A:G,A:G
AT1G22300	GRF10	-	AT1G22300.1,AT1G22300.2,AT1G22300.3	142.6316262,0.9507094,0.1838844	4	1_7878975,1_7881075,1_7879147,1_7878999	0.148,0.00553,0.00364,0.0123	0.663,0.778,1.22,1.15	2.46e-05,0.0387,0.0623,0.0978	T:C,T:C,T:C,T:C
AT1G22410	AT1G22410	+	AT1G22410.1	55.1190444	2	1_7912924,1_7912269	0.0746,0.0167	0.419,1.43	3.84e-05,0.000152	A:G,A:G
AT1G22520	AT1G22520	-	AT1G22520.1,AT1G22520.2	110.9775162,3.8371408	1	1_7953853	0.0236	0.497	0.0671	T:C
AT1G22750	AT1G22750	+	AT1G22750.4,AT1G22750.2,AT1G22750.3,AT1G22750.1	15.4399724,3.138171,2.6150398,2.564742	1	1_8052249	0.0169	2.77	0.0173	A:G
AT1G22780	RPS18A	+	AT1G22780.1	518.7649364	1	1_8069097	0.0257	0.442	0.000795	A:G
AT1G23190	PGM3	+	AT1G23190.1	22.4910404	1	1_8224321	0.043	1.67	0.0727	A:G
AT1G23220	AT1G23220	+	AT1G23220.1	45.4909312	1	1_8242728	0.366	0.519	1.2e-10	A:G
AT1G23290	RPL27AB	+	AT1G23290.1	860.7736274	3	1_8263206,1_8263417,1_8263219	0.0333,0.0336,0.00204	0.262,0.308,0.881	5.59e-06,4.49e-05,0.0176	A:G,A:G,A:G
AT1G23310	GGAT1	-	AT1G23310.1,AT1G23310.2	313.6288634,0.4689418	8	1_8270282,1_8270256,1_8270742,1_8269550,1_8268991,1_8268933,1_8270796,1_8271358	0.0214,0.00222,0.0103,0.00139,0.00349,0.0136,0.00107,0.00157	0.784,2.12,0.854,2.2,0.913,0.595,2.42,2.03	0.000313,0.00232,0.00516,0.0054,0.00927,0.0139,0.018,0.0317	T:C,T:C,T:C,T:C,T:C,T:C,T:C,T:C
AT1G24360	AT1G24360	+	AT1G24360.1	90.485086	3	1_8643116,1_8643114,1_8643142	0.00701,0.00646,0.011	2.06,0.395,0.715	0.000513,0.0683,0.0783	A:G,A:G,A:G
AT1G24510	CCT5	-	AT1G24510.1,AT1G24510.3,AT1G24510.2	87.3819112,0.0712676,0	1	1_8685869	0.0295	0.566	6.17e-06	T:C
AT1G25350	OVA9	-	AT1G25350.1,AT1G25350.2	8.611941,0	1	1_8889326	0.0261	3.03	0.0771	T:C
AT1G26630	ELF5A-2	+	AT1G26630.1,AT1G26630.2	1119.8791844,0.7680982	7	1_9206483,1_9206697,1_9206548,1_9207094,1_9206860,1_9207019,1_9206041	0.0634,0.026,0.0085,0.00655,0.00236,0.00616,0.00158	0.436,0.533,0.459,0.511,0.765,0.177,1.04	1.99e-17,2.89e-09,0.000832,0.00847,0.0517,0.0602,0.0799	A:G,A:G,A:G,A:G,A:G,A:G,A:G
AT1G26880	RPL34A	-	AT1G26880.1,AT1G26880.2	612.1444352,0.730817	2	1_9315592,1_9315599	0.232,0.303	0.326,0.274	1.25e-08,1.11e-07	T:C,T:C
AT1G27000	AT1G27000	+	AT1G27000.1	25.9336844	1	1_9376229	0.113	0.533	0.0155	A:G
AT1G27310	NTF2A	-	AT1G27310.1	244.464267	1	1_9485603	0.0371	0.121	0.0779	T:C
AT1G27435	AT1G27435	-	AT1G27435.1	425.9329634	4	1_9527888,1_9527845,1_9527883,1_9527879	0.212,0.048,0.0222,0.0126	0.416,0.626,1.68,1.35	2.93e-07,0.00666,0.00745,0.0251	T:C,T:C,T:C,T:C
AT1G27450	APT1	+	AT1G27450.2,AT1G27450.1,AT1G27450.3	153.2458926,36.9329268,26.9069536	3	1_9533929,1_9533931,1_9533930	0.0712,0.0231,0.0247	0.721,1.25,0.568	5.63e-05,0.000583,0.0235	A:G,A:G,A:G
AT1G29070	RPL34	+	AT1G29070.1	751.6595434	3	1_10151135,1_10151100,1_10151066	0.00674,0.00278,0.00256	0.407,0.558,1.12	0.0338,0.0483,0.0602	A:G,A:G,A:G
AT1G29150	RPN6	+	AT1G29150.1,AT1G29150.2	38.0352264,NA	1	1_10181896	0.0394	0.943	0.00609	A:G
AT1G29700	AT1G29700	-	AT1G29700.1,AT1G29700.2	10.4054594,NA	1	1_10385165	0.241	1.62	1.4e-05	T:C
AT1G29880	GLYRS-1	-	AT1G29880.1	18.9217012	1	1_10459659	0.221	0.426	9.96e-05	T:C
AT1G29900	CARB	+	AT1G29900.1	13.978668	1	1_10472678	0.000389	-1.1	0.056	A:G
AT1G29910	LHCB1.2	-	AT1G29910.1	9623.5697138	2	1_10472837,1_10473191	0.000738,0.000404	0.696,2.59	0.00941,0.0431	T:C,T:C
AT1G29930	LHCB1.3	+	AT1G29930.1	19473.671971	4	1_10478981,1_10478677,1_10478952,1_10478944	0.0135,0.000912,0.00229,0.00213	0.895,0.572,1.4,1.25	4.42e-08,0.0142,0.0188,0.0524	A:G,A:G,A:G,A:G
AT1G30380	PSAK	+	AT1G30380.1	5410.553047	3	1_10722699,1_10722884,1_10722696	0.00485,0.000545,0.00111	0.87,1.73,0.946	1.03e-09,0.00881,0.0744	A:G,A:G,A:G
AT1G30450	CCC1	+	AT1G30450.1,AT1G30450.4	3.5902358,0	1	1_10769113	0.382	0.468	0.00382	A:G
AT1G30580	AT1G30580	-	AT1G30580.1	95.6494594	3	1_10831883,1_10831808,1_10832291	0.1,0.0773,0.00396	0.564,1.12,1.48	7e-08,0.00152,0.0723	T:C,T:C,T:C
AT1G30630	AT1G30630	-	AT1G30630.1	46.3263462	1	1_10858542	0.11	0.324	0.00661	T:C
AT1G30680	T5I8.13	+	AT1G30680.1	9.1450646	1	1_10882240	0.0865	0.322	0.0971	A:G
AT1G31180	IMDH1	-	AT1G31180.1,AT1G31180.2	25.7013914,23.2512352	1	1_11142844	0.0623	0.85	0.00841	T:C
AT1G31800	CYP97A3	+	AT1G31800.1	18.3788328	1	1_11397606	0.0189	1.78	0.00407	A:G
AT1G31812	ACBP6	-	AT1G31812.1	1773.7979136	2	1_11410985,1_11411168	0.0709,0.00267	0.427,0.736	0.00927,0.0443	T:C,T:C
AT1G32080	PLGG1	-	AT1G32080.1	47.6125242	1	1_11537533	0.0341	1.42	1.02e-05	T:C
AT1G32400	TOM2A	-	AT1G32400.1,AT1G32400.2,AT1G32400.3	50.8586296,NA	1	1_11689246	0.0498	0.445	0.078	T:C
AT1G32500	ABCI7	-	AT1G32500.1	27.5719332	1	1_11750104	0.0265	1.77	0.0226	T:C
AT1G32550	FdC1	-	AT1G32550.1	53.9719592	1	1_11771841	0.0542	1.19	0.0624	T:C
AT1G33120	RPL9B	+	AT1G33120.1	558.1469844	6	1_12011575,1_12012213,1_12011610,1_12011625,1_12012153,1_12012156	0.0166,0.00282,0.00818,0.00523,0.00519,0.00328	0.416,0.878,0.164,0.523,0.101,0.484	0.000367,0.00795,0.00884,0.0156,0.0907,0.0947	A:G,A:G,A:G,A:G,A:G,A:G
AT1G33140	RPL9B	+	AT1G33140.1	895.324911	7	1_12024479,1_12024496,1_12024432,1_12024492,1_12023911,1_12023998,1_12024490	0.0237,0.0324,0.00454,0.0332,0.00874,0.0124,0.0409	0.235,0.229,0.815,0.163,0.573,0.33,0.123	8.14e-07,3.59e-05,3.75e-05,0.0021,0.00501,0.0226,0.0469	A:G,A:G,A:G,A:G,A:G,A:G,A:G
AT1G33810	AT1G33810	+	AT1G33810.1	175.584032	1	1_12266708	0.0875	0.316	0.0534	A:G
AT1G34000	OHP2	-	AT1G34000.1	151.1486762	1	1_12358064	0.0224	2.42	0.0905	T:C
AT1G34030	RPS18A	-	AT1G34030.1	413.7622664	5	1_12370245,1_12370146,1_12370266,1_12370668,1_12371099	0.046,0.0527,0.0131,0.00826,0.0183	0.981,0.745,1.29,0.616,0.313	1.39e-05,8.61e-05,0.00151,0.0133,0.0145	T:C,T:C,T:C,T:C,T:C
AT1G35580	CINV1	-	AT1G35580.1,AT1G35580.2	20.6733656,NA	1	1_13122571	0.219	0.59	6.66e-09	T:C
AT1G35680	RPL21	+	AT1G35680.1	413.4550008	5	1_13209762,1_13209422,1_13209055,1_13209750,1_13209938	0.0341,0.00735,0.00192,0.00133,0.00128	0.788,1.26,1.13,2.86,0.939	1.48e-18,3.97e-07,0.00688,0.0172,0.0665	A:G,A:G,A:G,A:G,A:G
AT1G41880	RPL35AB	-	AT1G41880.1,AT1G41880.2	753.4864526,NA	2	1_15651764,1_15651618	0.132,0.0425	0.221,0.305	2.35e-11,0.00297	T:C,T:C
AT1G42970	GAPB	+	AT1G42970.1	671.6086798	3	1_16129045,1_16128711,1_16129572	0.0266,0.000713,0.00123	0.429,1.5,1.77	1.58e-06,0.0787,0.0927	A:G,A:G,A:G
AT1G43170	ARP1	+	AT1G43170.1,AT1G43170.4	521.8924114,0	2	1_16268267,1_16268481	0.0296,0.00115	0.17,1.1	0.0162,0.0401	A:G,A:G
AT1G43670	AT1G43670	+	AT1G43670.1	79.1257714	1	1_16470340	0.0324	1.19	0.0185	A:G
AT1G43690	AT1G43690	+	AT1G43690.1	11.4111788	1	1_16482557	0.0238	1.34	0.086	A:G
AT1G44575	PSBS	+	AT1G44575.1,AT1G44575.2	1292.4229696,3.1364724	5	1_16873252,1_16872968,1_16872473,1_16873254,1_16873156	0.0127,0.0597,0.00268,0.0683,0.0455	0.678,0.342,0.951,0.5,0.41	0.00201,0.0162,0.0189,0.026,0.0684	A:G,A:G,A:G,A:G,A:G
AT1G44790	AT1G44790	-	AT1G44790.1	20.4769452	1	1_16912471	0.0741	0.602	0.0933	T:C
AT1G44835	AT1G44835	+	AT1G44835.1,AT1G44835.2	14.0308608,0	1	1_16942368	0.456	0.697	1.84e-07	A:G
AT1G47260	GAMMACA2	-	AT1G47260.1	113.1906744	2	1_17321277,1_17321550	0.0679,0.00873	0.62,0.75	0.0183,0.0333	T:C,T:C
AT1G47420	SDH5	-	AT1G47420.1	108.4045554	2	1_17395599,1_17395624	0.0533,0.0405	1.59,0.648	0.00195,0.00588	T:C,T:C
AT1G47490	RBP47C	+	AT1G47490.1,AT1G47490.2	21.0229472,1.7981002	1	1_17427256	0.0428	0.574	0.0455	A:G
AT1G47530	AT1G47530	+	AT1G47530.1,AT1G47530.2	34.3088912,3.7345836	1	1_17454146	0.285	0.188	0.0246	A:G
AT1G47550	SEC3A	+	AT1G47550.1,AT1G47550.2	4.9844408,1.3044448	1	1_17463066	0.245	0.681	0.000968	A:G
AT1G47740	AT1G47740	+	AT1G47740.1,AT1G47740.2,AT1G47740.3	22.7512592,NA	2	1_17569025,1_17568425	0.052,0.0804	0.88,0.579	0.0486,0.0824	A:G,A:G
AT1G48030	LPD1	-	AT1G48030.1,AT1G48030.2,AT1G48030.3,AT1G48030.4,AT1G48030.5	81.093198,NA	2	1_17717284,1_17717311	0.185,0.0584	0.402,0.439	0.00594,0.0107	T:C,T:C
AT1G48350	RPL18	+	AT1G48350.1	888.7296392	1	1_17868168	0.0108	0.283	0.0119	A:G
AT1G48410	AGO1	-	AT1G48410.2,AT1G48410.1	8.1579012,7.6996538	4	1_17886630,1_17886963,1_17887884,1_17886383	0.0615,0.0364,0.0396,0.0534	1.28,1.69,1.52,0.77	2.35e-11,0.000529,0.00158,0.00921	T:C,T:C,T:C,T:C
AT1G48450	AT1G48450	-	AT1G48450.1,AT1G48450.2	47.0704118,0.0107432	1	1_17908744	0.0352	0.609	0.0648	T:C
AT1G48830	RPS7A	-	AT1G48830.1,AT1G48830.2	376.6608596,NA	1	1_18059906	0.00484	1.45	0.0111	T:C
AT1G48850	EMB1144	-	AT1G48850.1,AT1G48850.3,AT1G48850.2	36.278419,0.0085098,0	1	1_18065268	0.0825	0.457	0.000227	T:C
AT1G48860	AT1G48860	-	AT1G48860.1,AT1G48860.2	27.778683,0.0419914	1	1_18071038	0.116	0.49	0.000736	T:C
AT1G49040	SCD1	-	AT1G49040.1,AT1G49040.4	3.2460932,NA	1	1_18139777	0.213	0.573	0.0481	T:C
AT1G49140	AT1G49140	-	AT1G49140.1,AT1G49140.2	425.7700868,NA	1	1_18177717	0.0743	0.229	0.000277	T:C
AT1G49240	ACT8	+	AT1G49240.1	55.4972062	1	1_18218095	0.365	0.134	0.00241	A:G
AT1G49300	RABG3E	+	AT1G49300.1,AT1G49300.2	39.4623752,NA	1	1_18236714	0.0348	0.518	0.0167	A:G
AT1G49510	emb1273	+	AT1G49510.1,AT1G49510.2	21.7250526,0	1	1_18328428	0.0928	0.64	0.0472	A:G
AT1G49600	RBP47A	-	AT1G49600.1,AT1G49600.2	38.9032326,0.174094	1	1_18359116	0.0109	0.859	0.0437	T:C
AT1G49630	PREP2	-	AT1G49630.1,AT1G49630.4,AT1G49630.5	2.3135906,0.4261632,0	1	1_18368386	0.11	1.31	0.00451	T:C
AT1G49700	AT1G49700	-	AT1G49700.2,AT1G49700.1	16.2047606,0	1	1_18388793	0.0296	2.43	0.0405	T:C
AT1G50010	TUBA4	+	AT1G50010.1	174.2302176	4	1_18519332,1_18518317,1_18519665,1_18518500	0.017,0.00159,0.00337,0.00708	0.96,2.18,1.51,0.973	9.53e-05,0.0182,0.0212,0.0902	A:G,A:G,A:G,A:G
AT1G50320	ATHX	-	AT1G50320.1	139.0677344	1	1_18638680	0.00758	1.56	0.0554	T:C
AT1G50370	FYPP1	+	AT1G50370.1	31.0833648	1	1_18661004	0.0319	0.676	0.00665	A:G
AT1G50380	AT1G50380	+	AT1G50380.2,AT1G50380.1	5.4067272,0	1	1_18666004	0.0907	0.931	0.014	A:G
AT1G50920	AT1G50920	+	AT1G50920.1	27.7231878	1	1_18871875	0.129	0.621	3.25e-05	A:G
AT1G51070	BHLH115	+	AT1G51070.1,AT1G51070.2	54.9430514,0.5288758	1	1_18929403	0.0526	0.495	0.062	A:G
AT1G51200	SAP2	+	AT1G51200.1,AT1G51200.2,AT1G51200.3,AT1G51200.4	201.279226,NA	2	1_18986154,1_18986156	0.218,0.0031	0.0709,1.81	0.0292,0.0444	A:G,A:G
AT1G51510	Y14	-	AT1G51510.1	107.7598316	3	1_19104077,1_19104562,1_19103028	0.309,0.0351,0.11	0.248,0.351,0.414	3.76e-11,0.0424,0.053	T:C,T:C,T:C
AT1G51590	MNS1	-	AT1G51590.1,AT1G51590.2	5.957969,0	1	1_19128468	0.315	0.11	0.0319	T:C
AT1G51600	GATA28	+	AT1G51600.1,AT1G51600.2	10.7673164,NA	1	1_19134816	0.0511	1.63	0.0819	A:G
AT1G51650	AT1G51650	+	AT1G51650.1	2288.042708	6	1_19153693,1_19153780,1_19152668,1_19152813,1_19153678,1_19153690	0.0702,0.0327,0.0149,0.00166,0.0129,0.00339	0.462,0.713,0.625,1.74,0.412,1.22	3.89e-05,0.000926,0.0165,0.0205,0.0349,0.0683	A:G,A:G,A:G,A:G,A:G,A:G
AT1G51980	AT1G51980	-	AT1G51980.1,AT1G51980.2	48.8250302,0.0099122	1	1_19325394	0.0455	0.564	0.00279	T:C
AT1G52220	CURT1C	-	AT1G52220.1,AT1G52220.3,AT1G52220.4,AT1G52220.2	182.8809906,11.9618678,0.7338366,0.234452	1	1_19453720	0.0405	0.598	0.000862	T:C
AT1G52300	RPL37B	-	AT1G52300.1	2727.9515786	3	1_19475235,1_19475201,1_19475236	0.0346,0.0146,0.0034	0.559,0.496,0.803	3.51e-12,0.00538,0.0263	T:C,T:C,T:C
AT1G52740	HTA9	+	AT1G52740.1	365.0585178	2	1_19646347,1_19646371	0.0157,0.0211	1.68,2.06	0.0123,0.0307	A:G,A:G
AT1G53310	PPC1	-	AT1G53310.1,AT1G53310.2,AT1G53310.3	12.1863134,NA	1	1_19884719	0.0318	1.1	0.0346	T:C
AT1G53670	MSRB1	+	AT1G53670.1,AT1G53670.2	55.7030368,0	1	1_20037522	0.0182	1.25	0.0206	A:G
AT1G53850	PAE1	-	AT1G53850.1,AT1G53850.2	54.9033264,NA	2	1_20104520,1_20104553	0.0278,0.0604	1.42,0.543	8.68e-05,0.00324	T:C,T:C
AT1G53910	RAP2-12	+	AT1G53910.1,AT1G53910.3	31.0119608,0.8477092	1	1_20136779	0.103	0.608	0.0176	A:G
AT1G54080	UBP1A	-	AT1G54080.1,AT1G54080.2	20.3292168,0.6331816	1	1_20184876	0.0405	0.556	0.0141	T:C
AT1G54580	ACP2	+	AT1G54580.1	396.1369822	2	1_20390865,1_20390864	0.0489,0.0145	0.643,0.858	1.24e-05,0.0111	A:G,A:G
AT1G54630	ACP3	-	AT1G54630.1,AT1G54630.2	234.3700002,1.0153662	1	1_20401652	0.0228	0.686	0.00117	T:C
AT1G54990	AXR4	+	AT1G54990.1	13.4874054	1	1_20513407	0.0304	0.988	0.0515	A:G
AT1G55670	PSAG	-	AT1G55670.1	1844.6249374	1	1_20803171	0.00179	0.598	0.0466	T:C
AT1G56000	AT1G56000	+	AT1G56000.1,AT1G56000.2	8.3965372,0.1906944	1	1_20945985	0.226	0.638	0.000152	A:G
AT1G56050	AT1G56050	+	AT1G56050.1	15.4634044	1	1_20966143	0.0865	0.885	0.000205	A:G
AT1G56070	LOS1	-	AT1G56070.1,AT1G56070.2,AT1G56070.3	189.0525396,NA	2	1_20968543,1_20968421	0.00854,0.00232	0.519,1.41	0.00339,0.0825	T:C,T:C
AT1G56280	ATDI19	-	AT1G56280.1,AT1G56280.2	399.9099694,0.036885	6	1_21073194,1_21073670,1_21073182,1_21073475,1_21073722,1_21073904	0.0826,0.00964,0.245,0.0655,0.0031,0.00564	0.306,0.858,0.108,0.199,1.17,0.559	3.02e-05,0.000508,0.00249,0.00345,0.00461,0.0811	T:C,T:C,T:C,T:C,T:C,T:C
AT1G56330	SAR1B	-	AT1G56330.1	158.3741156	2	1_21086869,1_21086978	0.0693,0.00746	0.354,1.3	0.000946,0.034	T:C,T:C
AT1G56450	PBG1	+	AT1G56450.1	79.1365774	1	1_21144198	0.0938	0.668	1.72e-07	A:G
AT1G57660	RPL21F	+	AT1G57660.1	877.4373138	1	1_21356131	0.0325	0.242	0.00592	A:G
AT1G57770	AT1G57770	+	AT1G57770.1	13.0765494	2	1_21396482,1_21397011	0.358,0.0618	0.544,0.905	0.000151,0.0121	A:G,A:G
AT1G57860	RPL21F	-	AT1G57860.1	452.847617	1	1_21430068	0.0511	0.469	9.07e-05	T:C
AT1G59600	ZCW7	-	AT1G59600.1	6.1305598	1	1_21889899	0.291	0.497	0.00255	T:C
AT1G59900	E1 ALPHA	+	AT1G59900.1	43.2542344	3	1_22053703,1_22053667,1_22053663	0.181,0.0408,0.0381	0.633,1.1,0.818	5.23e-06,0.0036,0.00718	A:G,A:G,A:G
AT1G60000	AT1G60000	-	AT1G60000.1	68.591284	1	1_22093948	0.0058	1.29	0.00955	T:C
AT1G60230	AT1G60230	-	AT1G60230.1	5.3869954	2	1_22213401,1_22212281	0.109,0.192	1.89,0.689	5.75e-05,0.0116	T:C,T:C
AT1G60600	ABC4	-	AT1G60600.2,AT1G60600.1	13.0115712,0	1	1_22325695	0.192	0.492	0.0151	T:C
AT1G60950	FD2	+	AT1G60950.1	2600.5506734	1	1_22445091	0.0651	0.367	2.23e-05	A:G
AT1G61520	LHCA3	+	AT1G61520.1,AT1G61520.2	2736.9444336,17.9026318	4	1_22700891,1_22700615,1_22700607,1_22700851	0.0125,0.00353,0.00194,0.000272	0.602,0.673,0.692,1.86	8.12e-16,2.98e-05,7.21e-05,0.0324	A:G,A:G,A:G,A:G
AT1G62750	CPEFG	-	AT1G62750.1	80.2437036	1	1_23234853	0.00618	1.98	0.00866	T:C
AT1G63660	AT1G63660	-	AT1G63660.1,AT1G63660.2	16.4707438,0	1	1_23605840	0.0248	2.81	9e-06	T:C
AT1G63770	AT1G63770	-	AT1G63770.3,AT1G63770.2,AT1G63770.4,AT1G63770.1,AT1G63770.5,AT1G63770.7	0.0523686,0.0152136,0,21.430133	2	1_23658058,1_23657768	0.24,0.0151	0.445,3.95	2.72e-07,0.00559	T:C,T:C
AT1G63810	AT1G63810	-	AT1G63810.1,AT1G63810.2	2.7311638,NA	2	1_23669908,1_23669665	0.116,0.523	1.5,0.492	9.37e-05,0.0139	T:C,T:C
AT1G63940	MDAR6	+	AT1G63940.2,AT1G63940.4,AT1G63940.3,AT1G63940.1	44.8305132,0.1009586,0.0053518,0	1	1_23733632	0.147	0.433	0.0493	A:G
AT1G63980	AT1G63980	+	AT1G63980.1,AT1G63980.2	12.1268112,0.3849524	1	1_23743108	0.18	0.191	0.0456	A:G
AT1G64090	RTNLB3	+	AT1G64090.1,AT1G64090.2	85.8795112,0.0322244	1	1_23790817	0.178	0.541	0.0539	A:G
AT1G64150	AT1G64150	-	AT1G64150.1	11.2829506	1	1_23810079	0.106	0.799	0.0112	T:C
AT1G64230	UBC28	+	AT1G64230.1,AT1G64230.4,AT1G64230.3	301.5118242,0.5666248,0.5317588	1	1_23835258	0.205	-0.624	0.00591	A:G
AT1G64510	RPS6	-	AT1G64510.2,AT1G64510.1	191.7551204,127.775829	1	1_23955139	0.00438	0.388	0.0542	T:C
AT1G64520	RPN12A	+	AT1G64520.1	81.255896	2	1_23958002,1_23957560	0.0157,0.00806	0.956,1.62	0.0078,0.0953	A:G,A:G
AT1G65260	VIPP1	+	AT1G65260.1,AT1G65260.2	73.2243474,0	3	1_24240351,1_24240377,1_24236897	0.162,0.0105,0.0298	0.861,0.725,0.716	4.76e-20,0.0187,0.0352	A:G,A:G,A:G
AT1G65280	AT1G65280	+	AT1G65280.1,AT1G65280.2	2.6961,NA	1	1_24246293	0.12	1.2	0.0999	A:G
AT1G65290	MTACP2	-	AT1G65290.1	516.071208	1	1_24249079	0.174	0.044	0.000163	T:C
AT1G65410	TGD3	+	AT1G65410.1	11.251804	1	1_24295976	0.0557	0.963	0.022	A:G
AT1G65720	AT1G65720	-	AT1G65720.1	66.9509342	1	1_24440466	0.068	0.506	0.0665	T:C
AT1G65930	CICDH	+	AT1G65930.1	98.8369206	1	1_24541861	0.0691	0.318	0.041	A:G
AT1G66240	ATX1	-	AT1G66240.1,AT1G66240.2,AT1G66240.3	322.6394248,236.2721382,0.6487522	1	1_24686345	0.0777	0.488	0.000752	T:C
AT1G66430	AT1G66430	+	AT1G66430.1	56.8648466	1	1_24779981	0.0053	1.08	0.0697	A:G
AT1G67080	ABA4	-	AT1G67080.1,AT1G67080.2	19.8911374,2.1212836	1	1_25045432	0.022	2.05	0.045	T:C
AT1G67090	RBCS-1A	-	AT1G67090.1,AT1G67090.2	18646.3260008,0.8344154	9	1_25048929,1_25048950,1_25048953,1_25048511,1_25049255,1_25048503,1_25048696,1_25048905,1_25048568	0.00578,0.00129,0.00314,0.00246,0.00688,0.000189,0.00104,0.000202,0.00729	0.709,1,0.861,0.732,0.927,2.05,0.534,1.6,0.374	4.84e-09,1.25e-07,2.15e-05,3.68e-05,0.00577,0.0455,0.0662,0.0732,0.0989	T:C,T:C,T:C,T:C,T:C,T:C,T:C,T:C,T:C
AT1G67250	AT1G67250	-	AT1G67250.1	112.270156	1	1_25163734	0.157	0.917	0.0193	T:C
AT1G67430	RPL17B	+	AT1G67430.1,AT1G67430.2	800.7123452,0.754798	12	1_25262961,1_25262349,1_25262967,1_25262973,1_25263641,1_25263338,1_25263692,1_25263626,1_25263474,1_25263005,1_25262960,1_25262481	0.0233,0.144,0.0145,0.000786,0.0116,0.00286,0.0127,0.0448,0.00966,0.00436,0.0045,0.0139	0.31,0.182,0.182,1.71,0.692,1.37,0.471,0.0853,0.398,0.451,0.339,0.228	3.67e-11,3.67e-06,1.34e-05,0.00246,0.0055,0.00668,0.0222,0.0276,0.0344,0.0404,0.0697,0.0808	A:G,A:G,A:G,A:G,A:G,A:G,A:G,A:G,A:G,A:G,A:G,A:G
AT1G67730	KCR1	+	AT1G67730.1	39.9685872	2	1_25393235,1_25393359	0.0296,0.15	1.11,0.301	0.00564,0.0194	A:G,A:G
AT1G67740	PSBY	-	AT1G67740.1	1178.7536382	1	1_25394630	0.00175	0.714	0.0172	T:C
AT1G69587	AT1G69587	-	AT1G69587.1,AT1G69587.2,AT1G69587.3,AT1G69587.4	NA	1	1_26179219	0.115	1.31	0.0331	T:C
AT1G69740	HEMB1	+	AT1G69740.1,AT1G69740.2,AT1G69740.3	79.910713,NA	1	1_26231927	0.00494	2.24	0.0216	A:G
AT1G69770	CMT3	-	AT1G69770.1	6.958721	2	1_26248634,1_26248605	0.264,0.151	0.473,0.688	0.00489,0.0142	T:C,T:C
AT1G69830	AMY3	-	AT1G69830.1	15.6281664	1	1_26288594	0.0408	1.21	0.0526	T:C
AT1G70410	BCA4	-	AT1G70410.2,AT1G70410.1	62.2569886,0	1	1_26534159	0.0215	1.49	0.00958	T:C
AT1G70600	RPL27AC	-	AT1G70600.1	511.682353	3	1_26621164,1_26621509,1_26621230	0.184,0.0138,0.0504	0.162,0.0948,0.0935	2.04e-08,0.0106,0.036	T:C,T:C,T:C
AT1G70770	AT1G70770	-	AT1G70770.1,AT1G70770.2	20.9367308,NA	4	1_26689829,1_26688423,1_26688422,1_26688469	0.149,0.102,0.21,0.0232	0.469,0.575,0.333,2.61	0.00114,0.00921,0.0367,0.037	T:C,T:C,T:C,T:C
AT1G72020	AT1G72020	-	AT1G72020.1	811.8799374	5	1_27109405,1_27109424,1_27109417,1_27109454,1_27109736	0.0532,0.171,0.0734,0.0118,0.0165	0.589,0.448,0.527,0.821,0.177	4.43e-05,0.000108,0.000234,0.0544,0.079	T:C,T:C,T:C,T:C,T:C
AT1G72370	RPSAA	-	AT1G72370.1,AT1G72370.2	428.2535644,0.6332202	7	1_27244721,1_27244152,1_27243081,1_27244105,1_27243149,1_27244054,1_27243710	0.049,0.0395,0.0134,0.00212,0.00762,0.00769,0.00701	0.274,0.176,0.667,0.959,0.342,0.349,0.319	4.86e-10,9.26e-09,0.00142,0.00184,0.0136,0.0221,0.0912	T:C,T:C,T:C,T:C,T:C,T:C,T:C
AT1G72640	AT1G72640	-	AT1G72640.2,AT1G72640.1,AT1G72640.4,AT1G72640.3	8.4509788,4.3512216,0.5190448,0.403216	1	1_27346751	0.14	0.548	0.0667	T:C
AT1G73060	LPA3	+	AT1G73060.1	33.7650952	1	1_27479144	0.019	1.1	0.0212	A:G
AT1G73180	AT1G73180	+	AT1G73180.1,AT1G73180.2	6.8590606,0.007001	1	1_27518569	0.0285	1.48	0.0664	A:G
AT1G73230	AT1G73230	-	AT1G73230.1	420.1465296	7	1_27540343,1_27540293,1_27540294,1_27540342,1_27540495,1_27540666,1_27540641	0.332,0.278,0.0437,0.0225,0.0123,0.0118,0.00157	0.326,0.455,1.3,1.02,0.465,0.112,0.745	1.14e-07,0.000692,0.00175,0.0294,0.0436,0.0786,0.0869	T:C,T:C,T:C,T:C,T:C,T:C,T:C
AT1G73885	AT1G73885	+	AT1G73885.1	329.4639734	1	1_27787610	0.01	0.574	0.0237	A:G
AT1G74270	RPL35AC	-	AT1G74270.1	515.489254	2	1_27928453,1_27928444	0.0467,0.0114	0.334,0.611	7.05e-05,0.00377	T:C,T:C
AT1G74960	KAS2	-	AT1G74960.2,AT1G74960.3,AT1G74960.1	NA,55.9547072	2	1_28152673,1_28152131	0.038,0.0597	0.502,0.541	0.0102,0.0786	T:C,T:C
AT1G74970	RPS9	-	AT1G74970.1	296.1487168	3	1_28157605,1_28157604,1_28158007	0.144,0.0381,0.0178	1.03,2.38,0.665	9.34e-05,0.00413,0.0208	T:C,T:C,T:C
AT1G75220	AT1G75220	-	AT1G75220.1	10.7780376	1	1_28229860	0.0571	1.37	0.0716	T:C
AT1G75350	RPL31	+	AT1G75350.1	746.8305962	1	1_28272656	0.00421	0.636	0.0315	A:G
AT1G75560	AT1G75560	-	AT1G75560.1,AT1G75560.2	44.6385496,NA	1	1_28371601	0.0569	0.626	0.0776	T:C
AT1G75630	VHA-C4	+	AT1G75630.1,AT1G75630.2	136.6856426,0.2211024	1	1_28402078	0.0298	1.87	6.24e-05	A:G
AT1G75690	LQY1	-	AT1G75690.1	328.6549396	1	1_28422274	0.0359	0.833	4.68e-06	T:C
AT1G75950	SKP1A	+	AT1G75950.1	354.4067964	1	1_28517418	0.012	0.801	0.0666	A:G
AT1G76010	AT1G76010	-	AT1G76010.1,AT1G76010.2	115.7178684,NA	7	1_28528477,1_28528464,1_28528362,1_28528471,1_28528465,1_28528478,1_28528474	0.0683,0.0362,0.349,0.0378,0.0263,0.00316,0.0141	0.492,0.619,0.16,0.273,0.71,2.26,0.309	3.41e-09,0.000624,0.00105,0.00822,0.0129,0.0552,0.0871	T:C,T:C,T:C,T:C,T:C,T:C,T:C
AT1G76140	AT1G76140	+	AT1G76140.1,AT1G76140.2	11.2559282,0.0102138	3	1_28573913,1_28573372,1_28573329	0.102,0.0614,0.0598	0.962,1.85,1.07	7.65e-05,0.00571,0.0227	A:G,A:G,A:G
AT1G76160	sks5	-	AT1G76160.1	22.8920058	1	1_28578200	0.0746	0.0985	0.0601	T:C
AT1G76200	AT1G76200	+	AT1G76200.1	1024.460033	4	1_28594560,1_28594513,1_28593421,1_28594580	0.0863,0.105,0.00706,0.0122	0.309,0.366,0.5,0.0688	7.21e-07,1.48e-06,0.0531,0.096	A:G,A:G,A:G,A:G
AT1G76300	SMD3A	+	AT1G76300.1	92.0978468	1	1_28627102	0.105	0.443	0.00882	A:G
AT1G76490	HMG1	+	AT1G76490.1	46.3555838	1	1_28698414	0.0236	0.783	0.0139	A:G
AT1G77590	LACS9	-	AT1G77590.1,AT1G77590.2	14.2467612,1.5777662	1	1_29149594	0.0572	1.02	0.00258	T:C
AT1G77940	RPL30B	-	AT1G77940.1	1375.2498596	2	1_29304138,1_29305085	0.00418,0.00319	0.714,0.127	0.0163,0.0401	T:C,T:C
AT1G78040	AT1G78040	+	AT1G78040.1,AT1G78040.2,AT1G78040.3	876.3820864,NA	1	1_29346524	0.0121	0.329	3.06e-06	A:G
AT1G78560	BASS1	-	AT1G78560.1	12.1889336	2	1_29547107,1_29546852	0.0414,0.087	1.37,1.12	0.0144,0.0613	T:C,T:C
AT1G78620	AT1G78620	-	AT1G78620.1,AT1G78620.2	25.0123376,0.1670356	2	1_29573825,1_29575590	0.0503,0.0705	1.09,0.411	0.0166,0.0471	T:C,T:C
AT1G78630	RPL13	+	AT1G78630.1	646.1008878	5	1_29577032,1_29577468,1_29577608,1_29577296,1_29576705	0.0658,0.0802,0.161,0.00741,0.0409	0.398,0.298,0.664,0.633,0.218	8.65e-12,1.97e-05,0.000707,0.0277,0.0474	A:G,A:G,A:G,A:G,A:G
AT1G78660	GGH1	+	AT1G78660.1,AT1G78660.2	11.4431494,1.654666	1	1_29586246	0.0436	1.08	0.0967	A:G
AT1G78900	VHA-A	+	AT1G78900.1,AT1G78900.2	82.2598848,NA	2	1_29662883,1_29664566	0.0755,0.0337	0.286,0.25	3.53e-05,0.0846	A:G,A:G
AT1G78915	AT1G78915	-	AT1G78915.1,AT1G78915.3,AT1G78915.2	11.2755864,0.0501956,0.0138778	1	1_29667746	0.135	0.515	0.0811	T:C
AT1G79010	AT1G79010	-	AT1G79010.1	113.6086826	3	1_29725124,1_29725422,1_29725231	0.0951,0.00636,0.0102	0.389,1.7,0.476	0.0232,0.0512,0.0884	T:C,T:C,T:C
AT1G79040	PSBR	+	AT1G79040.1	10223.5235248	2	1_29736165,1_29736146	0.00194,0.000217	0.524,0.859	0.0598,0.083	A:G,A:G
AT1G79075	AT1G79075	+	AT1G79075.1,AT1G79075.2	NA	2	1_29746683,1_29746676	0.501,0.25	0.208,0.094	2.67e-06,0.00919	A:G,A:G
AT1G79210	PAB2	-	AT1G79210.1,AT1G79210.2,AT1G79210.3	51.1323432,NA	1	1_29796460	0.0396	0.492	0.013	T:C
AT1G79530	GAPCP1	-	AT1G79530.1	19.81894	1	1_29916247	0.142	0.212	0.00661	T:C
AT1G79550	PGK	-	AT1G79550.1,AT1G79550.2	137.1748974,NA	1	1_29924818	0.0318	0.224	0.00171	T:C
AT1G79750	NADP-ME4	-	AT1G79750.1	34.1253568	4	1_30009737,1_30007666,1_30007896,1_30007431	0.0346,0.0465,0.0462,0.215	0.481,0.666,0.545,0.947	0.0031,0.00516,0.0125,0.0177	T:C,T:C,T:C,T:C
AT1G79790	AT1G79790	-	AT1G79790.1,AT1G79790.2,AT1G79790.4	27.5980128,1.1639228,0	1	1_30017748	0.0109	2.2	0.00909	T:C
AT1G79850	RPS17	-	AT1G79850.1	943.8058768	1	1_30041533	0.00728	0.433	0.0087	T:C
AT1G79920	HSP70-15	-	AT1G79920.1,AT1G79920.2	16.3750204,0	1	1_30058862	0.0968	0.515	0.0253	T:C
AT1G80230	COX5B-2	-	AT1G80230.1	104.6470908	1	1_30169779	0.0104	0.785	0.0968	T:C
AT1G80500	AT1G80500	+	AT1G80500.1,AT1G80500.2	133.1024188,NA	2	1_30272417,1_30272253	0.00748,0.0398	1.26,0.364	0.0479,0.066	A:G,A:G
AT1G80640	AT1G80640	+	AT1G80640.1,AT1G80640.2	12.7622058,0.0744682	1	1_30314139	0.0949	0.676	0.0557	A:G
AT1G80670	RAE1	-	AT1G80670.1	12.055712	2	1_30322251,1_30320799	0.111,0.0849	1.29,1.82	9.18e-05,0.0081	T:C,T:C
AT2G01250	RPL7B	-	AT2G01250.1,AT2G01250.2	477.2440338,243.2920818	2	2_133313,2_133050	0.0492,0.125	0.361,0.173	7.88e-10,4.3e-05	T:C,T:C
AT2G01490	PAHX	+	AT2G01490.1,AT2G01490.2	26.805655,NA	1	2_223206	0.135	0.347	0.0156	A:G
AT2G01970	TMN3	-	AT2G01970.1	12.775087	1	2_452114	0.0894	0.932	0.0106	T:C
AT2G02050	AT2G02050	+	AT2G02050.1	263.824134	1	2_490202	0.0104	0.822	0.0142	A:G
AT2G02510	AT2G02510	+	AT2G02510.1	466.875073	4	2_674549,2_674525,2_673535,2_674529	0.203,0.0263,0.0302,0.0637	0.352,0.433,0.307,0.275	0.000145,0.058,0.0621,0.0806	A:G,A:G,A:G,A:G
AT2G02740	WHY3	+	AT2G02740.1	23.3896806	2	2_771125,2_771135	0.13,0.0739	0.79,1.01	0.0871,0.0978	A:G,A:G
AT2G02760	UBC2	+	AT2G02760.1,AT2G02760.2,AT2G02760.3,AT2G02760.4	87.3036232,NA	1	2_775235	0.129	0.483	0.000786	A:G
AT2G04030	CR88	+	AT2G04030.1,AT2G04030.2	61.5059394,0.065678	3	2_1286003,2_1285919,2_1285885	0.0639,0.0983,0.00481	1.42,0.165,2.28	0.000491,0.02,0.0836	A:G,A:G,A:G
AT2G04360	AT2G04360	-	AT2G04360.1,AT2G04360.4,AT2G04360.2,AT2G04360.3	17.2245286,0.8605078,0.29848,0.008639	3	2_1519917,2_1520390,2_1519714	0.0341,0.0261,0.0462	0.88,2.38,1.36	0.000632,0.00283,0.0108	T:C,T:C,T:C
AT2G04390	RPS17A	+	AT2G04390.1	410.1255594	1	2_1528332	0.0475	0.241	0.0165	A:G
AT2G04630	NRPB6B	-	AT2G04630.1	55.873622	1	2_1619779	0.00963	0.862	0.02	T:C
AT2G04700	FTRC	+	AT2G04700.1,AT2G04700.2	144.7560624,2.8902974	2	2_1647260,2_1648384	0.0164,0.0069	1.3,1.87	0.000285,0.0198	A:G,A:G
AT2G05220	RPS17B	-	AT2G05220.1,AT2G05220.2	701.2445136,NA	2	2_1894761,2_1894696	0.0286,0.0363	0.303,0.445	0.000124,0.00202	T:C,T:C
AT2G05840	PAA2	+	AT2G05840.1,AT2G05840.2,AT2G05840.3	53.8481968,0.1522042,0.0500688	1	2_2236008	0.019	1.03	0.000594	A:G
AT2G11520	CRCK3	+	AT2G11520.1	4.061757	2	2_4621107,2_4621113	0.301,0.227	0.476,0.367	0.0183,0.0412	A:G,A:G
AT2G13360	AGT1	-	AT2G13360.1,AT2G13360.2,AT2G13360.3	358.1460656,NA	1	2_5539425	0.00595	0.748	0.0285	T:C
AT2G15290	TIC21	-	AT2G15290.1	62.9575404	3	2_6642787,2_6643412,2_6642806	0.0104,0.0131,0.0101	1.79,1.31,0.681	0.0188,0.0294,0.0793	T:C,T:C,T:C
AT2G16940	AT2G16940	-	AT2G16940.1,AT2G16940.4,AT2G16940.2,AT2G16940.3	9.2160152,0.217063,0.1089484,0.075363	1	2_7343088	0.249	0.103	0.0549	T:C
AT2G17360	RPS4A	+	AT2G17360.1,AT2G17360.2	321.8905204,0.28076	9	2_7547873,2_7547869,2_7548144,2_7548140,2_7547872,2_7547821,2_7548173,2_7547834,2_7547816	0.113,0.0317,0.0152,0.352,0.0147,0.0053,0.0107,0.00753,0.0126	0.192,0.208,0.531,0.201,0.296,0.636,0.75,0.47,0.362	7.42e-05,9.4e-05,9.53e-05,0.000455,0.0251,0.0288,0.0332,0.0417,0.0995	A:G,A:G,A:G,A:G,A:G,A:G,A:G,A:G,A:G
AT2G17390	AKR2B	+	AT2G17390.1	68.0708942	1	2_7557727	0.011	2.09	0.0853	A:G
AT2G17560	HMGB4	-	AT2G17560.1,AT2G17560.3	183.383195,6.3620778	1	2_7642478	0.428	0.248	3.74e-07	T:C
AT2G17720	P4H5	+	AT2G17720.1	13.2274516	1	2_7699166	0.035	2.09	0.0277	A:G
AT2G18020	RPL8A	+	AT2G18020.1	618.3018724	4	2_7837390,2_7837975,2_7838159,2_7837876	0.0135,0.0194,0.00902,0.00516	0.298,0.407,0.364,0.426	3.77e-06,5.85e-06,0.0427,0.0486	A:G,A:G,A:G,A:G
AT2G18390	ARL2	+	AT2G18390.1	27.3638418	1	2_7989248	0.0253	0.805	0.0214	A:G
AT2G18740	AT2G18740	+	AT2G18740.1,AT2G18740.2	155.4768476,0.069914	1	2_8124427	0.0104	1.56	0.0306	A:G
AT2G19520	MSI4	+	AT2G19520.1	26.9039866	7	2_8459166,2_8459279,2_8457915,2_8459449,2_8457268,2_8459146,2_8459201	0.0258,0.137,0.0408,0.0995,0.096,0.0129,0.012	1.73,0.356,1.07,1.35,0.329,1.08,1.11	2.49e-05,0.000258,0.00193,0.00587,0.044,0.0575,0.0653	A:G,A:G,A:G,A:G,A:G,A:G,A:G
AT2G19540	AT2G19540	+	AT2G19540.1	25.89727	1	2_8464020	0.0264	0.678	0.0227	A:G
AT2G19720	RPS15AB	-	AT2G19720.1	39.3019802	1	2_8510314	0.0734	0.421	0.00373	T:C
AT2G19730	RPL28A	+	AT2G19730.1,AT2G19730.2,AT2G19730.3	996.320762,NA	4	2_8512995,2_8512478,2_8512412,2_8511834	0.0418,0.00949,0.0243,0.000756	0.418,0.187,0.116,1.17	4.19e-07,3.87e-05,0.00921,0.0167	A:G,A:G,A:G,A:G
AT2G19740	RPL31A	+	AT2G19740.1	239.0180238	1	2_8514247	0.254	0.323	7.1e-12	A:G
AT2G19750	RPS30C	+	AT2G19750.1	1281.371908	2	2_8515891,2_8515865	0.0743,0.00753	0.188,0.388	0.00107,0.041	A:G,A:G
AT2G20280	AT2G20280	-	AT2G20280.1	14.8668072	1	2_8739992	0.0818	1.14	0.0206	T:C
AT2G20360	AT2G20360	+	AT2G20360.1	67.0206928	1	2_8789073	0.0353	0.505	0.0109	A:G
AT2G20420	AT2G20420	+	AT2G20420.1	67.1198882	1	2_8807890	0.0302	0.787	0.0021	A:G
AT2G20530	PHB6	+	AT2G20530.1,AT2G20530.2	50.727531,NA	1	2_8843746	0.172	0.341	4.81e-06	A:G
AT2G20580	RPN1A	+	AT2G20580.1	20.0918122	1	2_8864421	0.058	0.726	0.0027	A:G
AT2G20725	AT2G20725	-	AT2G20725.1	21.4795988	1	2_8934734	0.276	0.326	0.039	T:C
AT2G20890	THF1	+	AT2G20890.1	194.0197738	7	2_8988180,2_8988627,2_8989130,2_8988510,2_8989333,2_8987963,2_8988565	0.0134,0.00668,0.00243,0.012,0.108,0.00779,0.00264	1.15,1.63,1.6,0.702,1.31,0.263,0.739	0.000157,0.00224,0.00417,0.0228,0.0234,0.0792,0.0981	A:G,A:G,A:G,A:G,A:G,A:G,A:G
AT2G21160	AT2G21160	+	AT2G21160.1	126.8725306	1	2_9070018	0.018	0.468	0.0291	A:G
AT2G21170	TIM	-	AT2G21170.1,AT2G21170.2	224.0619816,1.496194	3	2_9071030,2_9071619,2_9071018	0.0321,0.011,0.0339	0.274,0.489,0.225	9.13e-06,0.000583,0.0137	T:C,T:C,T:C
AT2G21370	XK-1	-	AT2G21370.1,AT2G21370.4,AT2G21370.3,AT2G21370.2	7.0841918,0.3597548,0	1	2_9138891	0.102	1.19	0.00111	T:C
AT2G21580	RPS25B	+	AT2G21580.1,AT2G21580.2	995.459444,7.2026652	7	2_9237400,2_9237443,2_9237503,2_9237435,2_9237436,2_9237427,2_9237258	0.218,0.0233,0.0377,0.0568,0.0159,0.0291,0.00425	0.332,0.488,0.447,0.374,0.612,0.121,0.586	1.58e-11,1.98e-07,3.25e-07,2.27e-06,6.01e-05,0.00312,0.0726	A:G,A:G,A:G,A:G,A:G,A:G,A:G
AT2G21870	MGP1	-	AT2G21870.1,AT2G21870.2	350.2735708,0.5157774	3	2_9320281,2_9320620,2_9320622	0.0627,0.0334,0.0356	1.43,0.526,0.296	3.48e-06,0.00285,0.0205	T:C,T:C,T:C
AT2G21960	AT2G21960	+	AT2G21960.1	35.0716784	1	2_9356957	0.102	0.765	0.000569	A:G
AT2G22120	AT2G22120	+	AT2G22120.1,AT2G22120.2	7.6530038,0.8228244	1	2_9396681	0.0646	0.829	0.0869	A:G
AT2G22230	AT2G22230	+	AT2G22230.1	51.7365042	2	2_9451391,2_9451432	0.0587,0.0403	0.785,0.707	0.0105,0.0387	A:G,A:G
AT2G22400	AT2G22400	-	AT2G22400.1	10.2587826	2	2_9505497,2_9504965	0.0917,0.239	1.08,0.364	9.07e-05,0.0196	T:C,T:C
AT2G22475	GEM	+	AT2G22475.1,AT2G22475.2	13.1447924,0.1781792	1	2_9544742	0.0615	0.88	0.084	A:G
AT2G22670	IAA8	+	AT2G22670.4,AT2G22670.2,AT2G22670.1	114.2176984,2.5861778,0	6	2_9637573,2_9637452,2_9637396,2_9637457,2_9638099,2_9638446	0.00797,0.0409,0.0287,0.0205,0.00518,0.00984	1.85,0.962,1.05,0.928,1.25,1.19	2.03e-06,2.11e-06,1.75e-05,0.0209,0.0314,0.0776	A:G,A:G,A:G,A:G,A:G,A:G
AT2G22990	SCPL8	+	AT2G22990.1,AT2G22990.3,AT2G22990.4,AT2G22990.5,AT2G22990.2,AT2G22990.6	42.3676334,11.0909166,0.0932174,0.0716184,0.0240226,0	1	2_9789008	0.0615	0.516	0.000375	A:G
AT2G23090	AT2G23090	-	AT2G23090.1	1521.2062104	1	2_9829772	0.0615	0.147	0.0354	T:C
AT2G23350	PAB4	+	AT2G23350.1	67.1660992	10	2_9943495,2_9945551,2_9943836,2_9943420,2_9944907,2_9945547,2_9945662,2_9945678,2_9944452,2_9943333	0.0882,0.0125,0.0492,0.0187,0.018,0.134,0.0314,0.0179,0.0138,0.00625	0.516,2.2,0.571,0.839,0.834,0.281,0.645,0.589,1.09,0.869	4.24e-08,1.56e-05,3.94e-05,0.00146,0.00247,0.00253,0.00469,0.0391,0.056,0.068	A:G,A:G,A:G,A:G,A:G,A:G,A:G,A:G,A:G,A:G
AT2G23780	AT2G23780	-	AT2G23780.1,AT2G23780.2,AT2G23780.3	15.0122704,NA	1	2_10124030	0.0379	1.56	0.0765	T:C
AT2G23930	SNRNP-G	+	AT2G23930.1,AT2G23930.2	986.219133,0	1	2_10183157	0.0186	0.693	0.0634	A:G
AT2G24020	AT2G24020	-	AT2G24020.1,AT2G24020.2	132.3078994,0.9430192	1	2_10217780	0.217	0.749	3.05e-07	T:C
AT2G24090	AT2G24090	+	AT2G24090.1	766.7178324	2	2_10243419,2_10243421	0.0339,0.0196	0.601,0.699	2.33e-06,0.000257	A:G,A:G
AT2G24765	ARF3	+	AT2G24765.1,AT2G24765.2	62.4412238,0.1532722	1	2_10562789	0.184	0.245	0.00718	A:G
AT2G25280	AT2G25280	-	AT2G25280.1	14.5683974	1	2_10763121	0.0481	0.563	0.0987	T:C
AT2G25610	VHA-c''2	-	AT2G25610.2,AT2G25610.1	46.4185464,15.0174852	1	2_10902263	0.011	0.565	0.0767	T:C
AT2G25670	AT2G25670	-	AT2G25670.1,AT2G25670.2	48.3792084,NA	1	2_10929027	0.0187	1.6	0.0778	T:C
AT2G25870	AT2G25870	+	AT2G25870.1	20.085527	3	2_11034021,2_11034159,2_11033706	0.0205,0.0201,0.0262	1.09,2.36,0.623	0.00485,0.0063,0.0963	A:G,A:G,A:G
AT2G25970	AT2G25970	-	AT2G25970.1	24.7720222	1	2_11072658	0.013	0.818	0.0963	T:C
AT2G26500	AT2G26500	+	AT2G26500.1,AT2G26500.2,AT2G26500.3	1703.0009196,NA,5.9858304	2	2_11270825,2_11270626	0.0227,0.00224	0.618,1.22	0.00296,0.0871	A:G,A:G
AT2G26540	UROS	-	AT2G26540.1,AT2G26540.3,AT2G26540.2	10.9575654,0.1288148,0.082118	1	2_11288738	0.0241	2.22	0.0234	T:C
AT2G26590	RPN13	-	AT2G26590.1,AT2G26590.4	20.9037198,0.3010876	1	2_11311205	0.0491	1.76	0.0386	T:C
AT2G26900	BASS2	-	AT2G26900.1	108.2993862	1	2_11475084	0.0118	0.285	0.0783	T:C
AT2G27020	PAG1	-	AT2G27020.1,AT2G27020.2	58.3198932,33.3121926	1	2_11528492	0.0431	0.226	0.0719	T:C
AT2G27530	RPL10AB	-	AT2G27530.1,AT2G27530.2	613.1501388,NA	1	2_11763991	0.00532	0.717	0.00283	T:C
AT2G27720	RPP2A	+	AT2G27720.1,AT2G27720.3,AT2G27720.2,AT2G27720.4	1983.2312162,6.2077438,4.2961212,3.6691402	3	2_11819456,2_11818766,2_11819226	0.0282,0.00231,0.00117	0.439,0.277,0.611	0.0237,0.0311,0.0952	A:G,A:G,A:G
AT2G28000	CPN60A1	+	AT2G28000.1	172.4020604	1	2_11929202	0.0263	0.317	0.00232	A:G
AT2G28450	AT2G28450	-	AT2G28450.1,AT2G28450.2	2.6042676,0	1	2_12162602	0.235	0.811	0.0981	T:C
AT2G28800	ALB3	-	AT2G28800.1,AT2G28800.4,AT2G28800.3	82.9660436,0.0112788,0	1	2_12356526	0.173	0.324	0.00617	T:C
AT2G28910	CXIP4	-	AT2G28910.1,AT2G28910.2,AT2G28910.3	60.9664642,NA	1	2_12416303	0.0162	0.617	0.0234	T:C
AT2G29960	CYP19-4	-	AT2G29960.1,AT2G29960.2	54.6314236,0.0347172	1	2_12769180	0.27	0.117	0.0816	T:C
AT2G30050	SEC13B	+	AT2G30050.1	38.175218	1	2_12826358	0.142	0.341	0.000515	A:G
AT2G30570	PSBW	-	AT2G30570.1	5700.005686	2	2_13019439,2_13019435	0.00729,0.00106	0.631,1.09	7.27e-08,0.0206	T:C,T:C
AT2G30870	GSTF10	+	AT2G30870.1	222.9102074	1	2_13142041	0.0503	0.247	0.0312	A:G
AT2G31170	SYCO ARATH	-	AT2G31170.1,AT2G31170.2	8.2998458,0	1	2_13282823	0.0213	0.797	0.0674	T:C
AT2G31400	GUN1	-	AT2G31400.1,AT2G31400.2	48.5519478,0.5120182	1	2_13388732	0.0119	0.571	0.0496	T:C
AT2G31490	AT2G31490	+	AT2G31490.1	1307.4368698	6	2_13412205,2_13413056,2_13413014,2_13413031,2_13413069,2_13412088	0.0219,0.151,0.0118,0.00372,0.0226,0.0104	0.743,0.38,0.626,2.66,0.475,0.496	2.72e-07,9.61e-07,0.000426,0.00681,0.0228,0.0394	A:G,A:G,A:G,A:G,A:G,A:G
AT2G31570	GPX2	-	AT2G31570.1	190.1044692	1	2_13438199	0.0523	0.286	0.0033	T:C
AT2G31890	ATRAP	-	AT2G31890.1	6.7067688	1	2_13557545	0.0884	1.15	0.00486	T:C
AT2G32060	RPS12C	-	AT2G32060.1,AT2G32060.2,AT2G32060.3	580.2750118,NA	1	2_13639608	0.0103	0.67	0.00359	T:C
AT2G32700	LUH	+	AT2G32700.1,AT2G32700.6,AT2G32700.7	3.097591,2.8361322,0	1	2_13871102	0.0367	1.42	0.0954	A:G
AT2G32720	CYTB5-B	-	AT2G32720.1,AT2G32720.2	107.5876442,0.1726524	1	2_13877049	0.114	0.304	0.00424	T:C
AT2G32810	BGAL9	-	AT2G32810.1,AT2G32810.2	4.2769202,0.0285382	1	2_13919860	0.0493	1.16	0.00476	T:C
AT2G32920	PDIL2-3	-	AT2G32920.1	21.1635452	1	2_13962569	0.0532	0.636	0.0677	T:C
AT2G33040	ATPC	-	AT2G33040.1	157.1826048	1	2_14019060	0.0114	0.763	0.00745	T:C
AT2G33150	PED1	-	AT2G33150.1	57.9154802	2	2_14050048,2_14047801	0.0809,0.0176	0.638,0.376	4.72e-06,0.0711	T:C,T:C
AT2G33370	RPL23C	-	AT2G33370.1,AT2G33370.2	421.8573148,0	8	2_14144132,2_14143717,2_14144094,2_14144069,2_14143750,2_14144241,2_14143731,2_14143688	0.0166,0.0103,0.006,0.0209,0.0141,0.00163,0.0418,0.00534	0.684,0.897,1.01,0.313,0.437,1.52,0.444,2.02	3.82e-06,0.000692,0.0013,0.00641,0.00774,0.0164,0.0402,0.0851	T:C,T:C,T:C,T:C,T:C,T:C,T:C,T:C
AT2G33410	AT2G33410	+	AT2G33410.1	50.296173	1	2_14157409	0.0551	0.264	0.00625	A:G
AT2G33450	RPL28	+	AT2G33450.1	537.6616076	3	2_14174379,2_14174383,2_14174376	0.164,0.0314,0.0054	0.474,0.683,0.994	7.56e-16,3.46e-07,0.0829	A:G,A:G,A:G
AT2G33470	GLTP1	-	AT2G33470.1,AT2G33470.2	56.274553,NA	1	2_14176584	0.0332	0.825	0.0124	T:C
AT2G34040	AT2G34040	-	AT2G34040.1,AT2G34040.3	15.5434336,NA	1	2_14377941	0.279	0.424	0.0217	T:C
AT2G34250	AT2G34250	+	AT2G34250.1,AT2G34250.2,AT2G34250.3	67.6644214,NA	2	2_14464153,2_14463287	0.0241,0.0442	0.318,0.27	0.036,0.0489	A:G,A:G
AT2G34420	LHB1B2	-	AT2G34420.1	6588.8516082	4	2_14523432,2_14523410,2_14522795,2_14523558	0.00225,0.000743,0.000414,0.0439	1.22,1.43,-0.954,0.467	1.27e-05,0.0127,0.0659,0.0778	T:C,T:C,T:C,T:C
AT2G34430	LHB1B1	+	AT2G34430.1	2008.8402192	2	2_14524913,2_14525304	0.00056,0.00122	2.33,0.586	0.0128,0.077	A:G,A:G
AT2G34460	AT2G34460	+	AT2G34460.1	69.45988	2	2_14530666,2_14530261	0.0614,0.0105	0.626,1.09	3.32e-05,0.0316	A:G,A:G
AT2G34470	UREG	-	AT2G34470.1,AT2G34470.2	33.7474682,1.0468204	1	2_14531351	0.12	0.291	0.0278	T:C
AT2G34480	RPL18AB	-	AT2G34480.2,AT2G34480.1	555.8872266,406.1061502	7	2_14532816,2_14532947,2_14532944,2_14532915,2_14532938,2_14533041,2_14533197	0.0588,0.00701,0.0175,0.0434,0.00213,0.00428,0.00154	0.427,0.719,0.295,0.181,1.15,0.39,1.26	2.19e-07,0.000654,0.00102,0.0116,0.0617,0.0716,0.0904	T:C,T:C,T:C,T:C,T:C,T:C,T:C
AT2G34590	E1-BETA-2	-	AT2G34590.1	50.9057222	1	2_14568999	0.0913	0.549	0.000108	T:C
AT2G34630	SPS3	+	AT2G34630.2,AT2G34630.1	12.1860784,0	1	2_14581009	0.0239	1.52	0.0807	A:G
AT2G34640	PTAC12	-	AT2G34640.1	13.3562328	1	2_14583496	0.255	0.494	0.00019	T:C
AT2G34710	ATHB-14	-	AT2G34710.1	4.5575804	1	2_14640443	0.109	0.63	0.0215	T:C
AT2G34750	AT2G34750	-	AT2G34750.1	11.216767	1	2_14661411	0.0487	1.05	0.0973	T:C
AT2G34860	EDA3	+	AT2G34860.1,AT2G34860.2	152.9808394,NA	5	2_14710020,2_14709966,2_14709508,2_14709981,2_14710080	0.0555,0.0713,0.0291,0.0354,0.105	1.15,0.824,0.871,0.983,0.823	2.94e-07,1.29e-06,2.35e-06,9.92e-05,0.0219	A:G,A:G,A:G,A:G,A:G
AT2G35370	GDH1	+	AT2G35370.1	731.5531448	1	2_14891470	0.0103	0.614	0.00163	A:G
AT2G35500	SKL2	+	AT2G35500.1	35.8277794	1	2_14914868	0.0295	1.02	0.000805	A:G
AT2G35795	TIM14-1	+	AT2G35795.1	81.036595	1	2_15043402	0.0618	1.75	0.0418	A:G
AT2G36160	RPS14A	+	AT2G36160.1	861.5665674	2	2_15170931,2_15170885	0.00396,0.00123	0.616,1.71	2.7e-05,0.0316	A:G,A:G
AT2G36170	RPL40B	+	AT2G36170.1	465.2208526	2	2_15172393,2_15172553	0.00257,0.00783	2.56,0.265	0.0446,0.0821	A:G,A:G
AT2G36250	FTSZ2-1	-	AT2G36250.1,AT2G36250.4	24.0401598,1.4610972	2	2_15197577,2_15198707	0.0768,0.0165	0.486,1.7	0.0294,0.0903	T:C,T:C
AT2G36530	ENO2	-	AT2G36530.1,AT2G36530.2	281.1064564,0.0782202	3	2_15321085,2_15321036,2_15322966	0.00369,0.00503,0.00134	1.1,1.19,1.53	0.00134,0.004,0.0245	T:C,T:C,T:C
AT2G36620	RPL24A	-	AT2G36620.1	523.2889028	1	2_15350547	0.51	0.223	2.64e-06	T:C
AT2G36850	CALS10	-	AT2G36850.1	3.379707	1	2_15455246	0.0444	1.12	0.00268	T:C
AT2G37080	ICR2	-	AT2G37080.1,AT2G37080.3	5.3143616,3.5175438	2	2_15581551,2_15581502	0.25,0.483	1.07,0.275	0.000565,0.0714	T:C,T:C
AT2G37220	CP29B	-	AT2G37220.1	659.4739964	3	2_15634793,2_15635024,2_15634969	0.0061,0.0024,0.0117	0.667,1.11,0.0906	0.00194,0.00236,0.0472	T:C,T:C,T:C
AT2G37270	RPS5A	-	AT2G37270.1,AT2G37270.2	243.8197998,NA	1	2_15647923	0.0215	0.591	0.00652	T:C
AT2G37340	RS2Z33	-	AT2G37340.1,AT2G37340.2,AT2G37340.3	60.6166362,0.4647682,0	7	2_15670512,2_15670858,2_15670558,2_15670415,2_15670444,2_15670623,2_15671098	0.358,0.022,0.351,0.0391,0.0104,0.329,0.104	0.255,0.832,0.183,0.272,1.01,0.186,0.222	0.00813,0.0104,0.0308,0.0472,0.0701,0.0926,0.0997	T:C,T:C,T:C,T:C,T:C,T:C,T:C
AT2G37500	AT2G37500	-	AT2G37500.1,AT2G37500.2	15.3849688,0	2	2_15740640,2_15739945	0.128,0.0442	0.601,1.23	2.11e-05,0.0124	T:C,T:C
AT2G37660	AT2G37660	-	AT2G37660.1	274.6042462	2	2_15795785,2_15795495	0.00743,0.00288	0.646,1.07	4.04e-06,0.0112	T:C,T:C
AT2G37690	AT2G37690	+	AT2G37690.1	6.542298	1	2_15809775	0.212	0.625	0.0105	A:G
AT2G37860	LCD1	+	AT2G37860.3,AT2G37860.1	28.006715,0.0448112	2	2_15857471,2_15858738	0.0932,0.0511	0.335,0.486	0.0204,0.03	A:G,A:G
AT2G38025	AT2G38025	-	AT2G38025.1,AT2G38025.2	30.4321454,0.3284268	1	2_15915126	0.0265	1.95	0.00718	T:C
AT2G38140	RPS31	+	AT2G38140.1	822.7297368	1	2_15981338	0.0132	0.574	0.00284	A:G
AT2G38280	AMPD	-	AT2G38280.1,AT2G38280.2	4.963816,NA	1	2_16033752	0.0291	1.75	0.0803	T:C
AT2G38530	LTP2	+	AT2G38530.1	880.2941798	1	2_16128772	0.0456	0.465	7.84e-05	A:G
AT2G38670	PECT1	+	AT2G38670.1	22.6959486	1	2_16169151	0.0222	1.26	0.00331	A:G
AT2G39190	ATATH8	+	AT2G39190.2,AT2G39190.1	9.7790894,0.0626142	5	2_16355391,2_16355546,2_16355542,2_16355614,2_16355549	0.148,0.11,0.06,0.0362,0.0341	1.31,1.16,1.5,1.68,1.76	9.94e-08,2.06e-05,0.000432,0.0199,0.0207	A:G,A:G,A:G,A:G,A:G
AT2G39390	RPL35B	-	AT2G39390.1	785.7802724	2	2_16451050,2_16451527	0.0399,0.00124	0.429,1.19	1.22e-05,0.0271	T:C,T:C
AT2G39460	RPL23AA	+	AT2G39460.1,AT2G39460.2	725.4806718,NA	1	2_16475973	0.0184	0.563	0.0228	A:G
AT2G39670	AT2G39670	+	AT2G39670.1,AT2G39670.2	32.5306274,0.0165336	1	2_16535712	0.015	0.425	0.0226	A:G
AT2G39730	RCA	-	AT2G39730.1,AT2G39730.2,AT2G39730.3	1223.1525912,410.4731758,25.4196778	3	2_16572376,2_16572534,2_16570958	0.00594,0.00505,0.000558	0.888,0.45,2.34	1.31e-07,2.49e-06,0.00729	T:C,T:C,T:C
AT2G39780	RNS2	+	AT2G39780.1	33.542021	1	2_16592559	0.0639	0.288	0.0256	A:G
AT2G40010	RPP0A	-	AT2G40010.1	15.3889342	5	2_16709107,2_16710040,2_16710232,2_16709117,2_16709116	0.198,0.416,0.407,0.089,0.0676	1.33,0.503,0.412,1.38,0.971	5.03e-08,1.42e-05,2.69e-05,0.000731,0.0592	T:C,T:C,T:C,T:C,T:C
AT2G40510	RPS26B	+	AT2G40510.1	532.8120584	1	2_16919669	0.0178	0.813	0.00661	A:G
AT2G41680	NTRC	-	AT2G41680.1	40.9487648	2	2_17376282,2_17376811	0.0203,0.296	2.69,0.0507	0.0179,0.0816	T:C,T:C
AT2G41840	RPS2C	-	AT2G41840.1	675.8376756	7	2_17460122,2_17460819,2_17460795,2_17460028,2_17461076,2_17460782,2_17460773	0.0407,0.0246,0.0109,0.00356,0.00457,0.00639,0.00144	0.371,0.496,0.471,1.41,0.648,0.358,1.29	1.18e-12,2.48e-11,1.35e-05,0.00102,0.00247,0.00771,0.0673	T:C,T:C,T:C,T:C,T:C,T:C,T:C
AT2G42210	OEP163	+	AT2G42210.2,AT2G42210.1	207.9683464,0	1	2_17591619	0.0926	0.159	0.0812	A:G
AT2G42500	PP2A4	-	AT2G42500.1,AT2G42500.2	30.6499546,0.1248128	1	2_17698341	0.0222	1.32	0.0497	T:C
AT2G42910	PRS4	+	AT2G42910.1	32.7219284	1	2_17858336	0.00868	1.12	0.0975	A:G
AT2G43030	RPL3A	+	AT2G43030.1	446.580169	2	2_17895107,2_17895790	0.0253,0.0245	0.517,0.589	7.92e-06,0.01	A:G,A:G
AT2G43460	RPL38B	-	AT2G43460.1	4175.9571214	9	2_18046124,2_18046273,2_18046779,2_18046284,2_18046112,2_18046858,2_18046125,2_18046773,2_18046262	0.0229,0.0236,0.0563,0.0421,0.017,0.0345,0.0136,0.00739,0.000863	2,0.202,0.23,0.186,1.33,0.145,2.09,0.438,1.14	0.000306,0.000392,0.000442,0.000855,0.00474,0.00642,0.00821,0.0113,0.0668	T:C,T:C,T:C,T:C,T:C,T:C,T:C,T:C,T:C
AT2G43560	FKBP16-3	-	AT2G43560.1,AT2G43560.2	105.649097,2.338741	1	2_18074094	0.0315	0.883	2.95e-07	T:C
AT2G43630	AT2G43630	+	AT2G43630.1	28.0210384	1	2_18097348	0.122	0.285	0.0835	A:G
AT2G43750	OASB	-	AT2G43750.1,AT2G43750.2	89.6252626,NA	2	2_18129656,2_18129634	0.0166,0.0429	0.649,0.336	0.00487,0.0147	T:C,T:C
AT2G43790	MPK6	+	AT2G43790.1	10.8800358	1	2_18139584	0.135	0.87	0.00667	A:G
AT2G43970	LARP6B	-	AT2G43970.1,AT2G43970.2	37.1174556,0.2408524	1	2_18205758	0.00613	1.4	0.0693	T:C
AT2G44040	DAPB1	-	AT2G44040.1	38.0621878	1	2_18221933	0.0251	0.589	0.0837	T:C
AT2G44100	GDI1	+	AT2G44100.1,AT2G44100.2	46.8590436,0.0191254	3	2_18243800,2_18244409,2_18244694	0.0204,0.02,0.0513	0.658,0.744,0.442	0.000656,0.0444,0.0891	A:G,A:G,A:G
AT2G44120	RPL7C	-	AT2G44120.2,AT2G44120.1	264.7828336,0	3	2_18249222,2_18249505,2_18250299	0.115,0.0194,0.00282	0.433,0.277,1.11	1.73e-13,0.0235,0.0869	T:C,T:C,T:C
AT2G44650	CHL-CPN10	-	AT2G44650.1	431.4003446	2	2_18420144,2_18420168	0.0895,0.00372	0.327,0.691	1e-09,0.00946	T:C,T:C
AT2G45640	SAP18	-	AT2G45640.1,AT2G45640.2	87.2693758,0.1987746	1	2_18799824	0.125	0.18	0.0854	T:C
AT2G45700	AT2G45700	-	AT2G45700.1,AT2G45700.2	2.9825122,0.0385996	1	2_18827161	0.105	2.41	0.0795	T:C
AT2G45960	PIP1-2	+	AT2G45960.1,AT2G45960.3,AT2G45960.2	548.5636932,234.335788,6.417946	1	2_18911043	0.00779	0.289	0.000323	A:G
AT2G46230	AT2G46230	-	AT2G46230.1,AT2G46230.2	47.6506752,0.3034818	1	2_18984378	0.0575	1.31	0.0684	T:C
AT2G46280	TIF3I1	-	AT2G46280.1,AT2G46280.3	76.9419404,0.1531662	4	2_19004408,2_19003657,2_19004021,2_19003663	0.0536,0.0258,0.00503,0.17	0.654,0.923,1.47,0.133	2.32e-06,0.000365,0.0532,0.0967	T:C,T:C,T:C,T:C
AT2G46420	AT2G46420	+	AT2G46420.1,AT2G46420.2	5.8283824,0.1104362	1	2_19055635	0.152	1.46	0.00278	A:G
AT2G46505	SDH4	-	AT2G46505.1	103.4597402	1	2_19090033	0.26	0.441	6.03e-08	T:C
AT2G46910	PAP10	+	AT2G46910.1	33.1026376	1	2_19273946	0.085	1.51	0.0176	A:G
AT2G47070	SPL1	+	AT2G47070.1,AT2G47070.2	13.0907368,0	1	2_19339774	0.0272	1.14	0.041	A:G
AT2G47380	AT2G47380	+	AT2G47380.1,AT2G47380.2	664.6946594,NA	1	2_19441829	0.00469	0.619	0.0451	A:G
AT2G47610	RPL7AA	+	AT2G47610.1	359.6261596	3	2_19530873,2_19531465,2_19531124	0.0341,0.0249,0.00951	0.333,0.336,-0.039	1.83e-06,0.0133,0.0942	A:G,A:G,A:G
AT2G47690	AT2G47690	+	AT2G47690.1,AT2G47690.2,AT2G47690.3	293.234929,1.1616478,0.0389732	2	2_19552022,2_19552013	0.118,0.00961	0.446,0.467	7.37e-12,0.0161	A:G,A:G
AT2G47710	AT2G47710	-	AT2G47710.1	100.7594062	1	2_19555019	0.0805	0.658	3.68e-05	T:C
AT2G48020	AT2G48020	+	AT2G48020.1,AT2G48020.4,AT2G48020.3	14.104854,0.0785794,0.0662288	1	2_19646995	0.172	0.702	0.00401	A:G
AT3G01120	CGS1	-	AT3G01120.1	104.453475	3	3_39252,3_39338,3_39345	0.0907,0.0303,0.0348	0.455,0.493,0.421	7.16e-10,0.00776,0.0104	T:C,T:C,T:C
AT3G01480	CYP38	+	AT3G01480.1,AT3G01480.2	77.8204022,1.2013432	1	3_189046	0.0199	0.905	0.0146	A:G
AT3G02090	MPPBETA	+	AT3G02090.1,AT3G02090.2	42.5686596,16.4739676	8	3_367295,3_368581,3_367365,3_368538,3_368619,3_368540,3_368566,3_368539	0.0629,0.363,0.0407,0.0505,0.0163,0.0177,0.00691,0.0117	1.18,0.468,1.25,0.761,1.24,1.19,2.17,0.689	4.51e-13,1.03e-09,1.42e-08,2.47e-05,0.00997,0.0178,0.0256,0.0303	A:G,A:G,A:G,A:G,A:G,A:G,A:G,A:G
AT3G02200	AT3G02200	+	AT3G02200.2,AT3G02200.1	33.561269,0.0196174	1	3_406669	0.0295	2.29	0.016	A:G
AT3G02560	RPS7B	+	AT3G02560.1,AT3G02560.2,AT3G02560.3	328.3418328,NA	1	3_543149	0.0571	0.259	0.00806	A:G
AT3G02730	TRXF1	-	AT3G02730.1	238.5262204	1	3_588596	0.00958	0.934	0.00966	T:C
AT3G02760	AT3G02760	-	AT3G02760.1,AT3G02760.2	6.1424728,NA	1	3_597828	0.0371	0.796	0.0671	T:C
AT3G02780	IPP2	-	AT3G02780.1,AT3G02780.2	57.0876172,0.0836156	1	3_602660	0.101	0.245	0.0142	T:C
AT3G02900	AT3G02900	+	AT3G02900.1,AT3G02900.2	63.0920942,0.0880584	1	3_647377	0.027	0.847	0.0813	A:G
AT3G03380	DEGP7	+	AT3G03380.1,AT3G03380.2	4.004374,2.0082414	2	3_808342,3_805339	0.139,0.213	1.04,0.525	0.0567,0.0663	A:G,A:G
AT3G03920	AT3G03920	-	AT3G03920.1	260.5135926	6	3_1009679,3_1009725,3_1009131,3_1009149,3_1009135,3_1009719	0.164,0.0174,0.0425,0.0102,0.017,0.00161	0.376,0.308,0.427,1.08,0.563,1.92	1.56e-11,0.0136,0.0228,0.0391,0.0558,0.0671	T:C,T:C,T:C,T:C,T:C,T:C
AT3G03960	CCT8	+	AT3G03960.1	45.329881	1	3_1027010	0.0541	0.217	0.0023	A:G
AT3G04120	GAPC1	+	AT3G04120.1	422.6624544	2	3_1082997,3_1083160	0.0103,0.0349	0.347,0.163	0.0031,0.00755	A:G,A:G
AT3G04400	RPL23C	+	AT3G04400.1,AT3G04400.2	2173.2875288,0	2	3_1168285,3_1167714	0.0171,0.0102	-0.0101,-0.00594	0.0196,0.092	A:G,A:G
AT3G04600	AT3G04600	+	AT3G04600.1,AT3G04600.2	19.8710886,0.0076994	2	3_1245775,3_1245542	0.199,0.0223	0.686,0.748	0.000344,0.00421	A:G,A:G
AT3G04610	FLK	-	AT3G04610.1,AT3G04610.3	7.405718,0	1	3_1252387	0.119	0.862	0.00247	T:C
AT3G04840	RPS3AA	+	AT3G04840.1	570.2901622	5	3_1331183,3_1331103,3_1331157,3_1331087,3_1331102	0.0842,0.0135,0.00517,0.011,0.00434	0.315,0.562,0.543,0.329,0.49	1.18e-08,1.82e-05,0.00531,0.0234,0.028	A:G,A:G,A:G,A:G,A:G
AT3G04920	RPS24A	+	AT3G04920.1,AT3G04920.2	837.248312,2.516991	2	3_1362228,3_1362145	0.124,0.0668	0.722,0.742	7.85e-13,4.19e-10	A:G,A:G
AT3G05350	AT3G05350	-	AT3G05350.1	8.431814	3	3_1527067,3_1529243,3_1527409	0.465,0.149,0.087	0.919,0.79,0.977	0.000227,0.000594,0.00284	T:C,T:C,T:C
AT3G05530	RPT5A	+	AT3G05530.1	46.1537314	6	3_1605777,3_1605358,3_1605341,3_1606094,3_1604304,3_1605685	0.0318,0.0562,0.00561,0.123,0.145,0.0443	0.743,0.419,1.23,1.2,0.34,0.397	0.0021,0.0313,0.0401,0.0505,0.0545,0.0917	A:G,A:G,A:G,A:G,A:G,A:G
AT3G05590	RPL18B	+	AT3G05590.1,AT3G05590.2	1129.4590568,0	13	3_1621873,3_1622699,3_1622021,3_1621880,3_1621826,3_1622049,3_1622726,3_1622415,3_1622626,3_1622092,3_1622446,3_1621879,3_1622027	0.153,0.0402,0.0095,0.00828,0.0341,0.0249,0.0089,0.00609,0.0229,0.00243,0.00211,0.0026,0.00262	0.355,0.3,0.454,0.522,0.325,0.257,0.716,0.762,0.172,0.623,1.2,0.632,0.563	6.1e-10,5.68e-08,1.12e-06,3.89e-06,4.97e-05,7e-05,7.02e-05,0.00015,0.00149,0.00509,0.0116,0.0537,0.0902	A:G,A:G,A:G,A:G,A:G,A:G,A:G,A:G,A:G,A:G,A:G,A:G,A:G
AT3G06355		+	AT3G06355.1	NA	1	3_14200076	0.0358	-1.84	1.57e-08	A:G
AT3G06700	RPL29A	-	AT3G06700.1,AT3G06700.2,AT3G06700.3	2832.3870832,NA	1	3_2117593	0.00291	0.67	0.0667	T:C
AT3G06720	IMPA1	+	AT3G06720.1,AT3G06720.2	13.6579278,NA	1	3_2123707	0.31	0.252	0.00344	A:G
AT3G06930	PRMT13	-	AT3G06930.1,AT3G06930.2	6.3629218,0.2469014	1	3_2185333	0.0759	2.6	0.0174	T:C
AT3G07110	RPL13AA	+	AT3G07110.1,AT3G07110.2	357.7548988,0.6291342	2	3_2252180,3_2252685	0.00173,0.0346	1.47,0.0462	0.0759,0.0952	A:G,A:G
AT3G07560	PEX13	-	AT3G07560.1	36.2724614	2	3_2411444,3_2411600	0.0754,0.0729	0.267,0.199	0.0713,0.0871	T:C,T:C
AT3G07568	AT3G07568	-	AT3G07568.1	201.2994672	1	3_2416466	0.244	0.426	1.06e-07	T:C
AT3G07880	GDI1	+	AT3G07880.1	51.9851508	1	3_2515364	0.0102	1.09	0.022	A:G
AT3G08530	CHC2	-	AT3G08530.1	9.2117846	1	3_2587532	0.0104	1.05	0.0503	T:C
AT3G08580	AAC1	-	AT3G08580.1,AT3G08580.2	422.419509,NA	4	3_2605803,3_2606269,3_2605884,3_2605915	0.0961,0.0115,0.00108,0.00187	0.419,0.393,1.45,1.6	2.19e-15,0.0326,0.0508,0.0828	T:C,T:C,T:C,T:C
AT3G08610	AT3G08610	-	AT3G08610.1	1243.24474	12	3_2616488,3_2615637,3_2615640,3_2616426,3_2616668,3_2615631,3_2615654,3_2616482,3_2615634,3_2615653,3_2615680,3_2616521	0.189,0.326,0.0998,0.0143,0.0254,0.00634,0.0192,0.00745,0.0149,0.0253,0.00293,0.00151	0.348,0.275,0.387,0.821,0.5,2.72,0.458,0.748,0.29,0.3,1.91,0.76	3.99e-13,1.89e-08,3.77e-08,7.1e-08,1.89e-07,0.000412,0.00125,0.00724,0.00942,0.0223,0.0395,0.0533	T:C,T:C,T:C,T:C,T:C,T:C,T:C,T:C,T:C,T:C,T:C,T:C
AT3G08740	AT3G08740	-	AT3G08740.1	208.0472562	3	3_2654847,3_2654721,3_2654886	0.115,0.0465,0.00472	0.51,0.469,1.41	2.03e-05,0.00178,0.00213	T:C,T:C,T:C
AT3G09200	RPP0B	-	AT3G09200.1,AT3G09200.2	514.4156788,0.014938	22	3_2823365,3_2823881,3_2824992,3_2823922,3_2823406,3_2823886,3_2824978,3_2823952,3_2823434,3_2824628,3_2823481,3_2823792,3_2824995,3_2823974,3_2823428,3_2824798,3_2824896,3_2823430,3_2823808,3_2823986,3_2824887,3_2823422	0.0608,0.0221,0.0299,0.00365,0.0103,0.0149,0.0181,0.00733,0.0115,0.0149,0.0372,0.0121,0.0301,0.0189,0.0041,0.00443,0.00161,0.0167,0.00507,0.00668,0.00216,0.00134	0.444,0.593,0.439,1.43,0.892,0.484,0.489,0.656,0.466,0.538,0.18,0.272,0.348,0.23,1.01,0.391,1.13,0.181,0.354,0.472,0.754,1.56	2.72e-12,6.15e-11,1.17e-06,2.86e-06,3.08e-06,1.11e-05,1.62e-05,6.07e-05,9.8e-05,0.000255,0.000323,0.000337,0.000539,0.0059,0.00658,0.00953,0.0144,0.0219,0.0386,0.0397,0.0508,0.0674	T:C,T:C,T:C,T:C,T:C,T:C,T:C,T:C,T:C,T:C,T:C,T:C,T:C,T:C,T:C,T:C,T:C,T:C,T:C,T:C,T:C,T:C
AT3G09260	BGLU23	-	AT3G09260.1	282.436174	1	3_2841496	0.0118	0.781	1.12e-05	T:C
AT3G09500	RPL35A	+	AT3G09500.1	3399.5552638	3	3_2917835,3_2917846,3_2917665	0.037,0.0289,0.000871	0.279,0.146,0.695	5.74e-07,2.42e-06,0.0722	A:G,A:G,A:G
AT3G09840	CDC48A	+	AT3G09840.1	66.817765	2	3_3022415,3_3022639	0.0478,0.0149	0.812,1.29	6.94e-07,2.44e-05	A:G,A:G
AT3G10330	TFIIB2	+	AT3G10330.1	10.1483992	1	3_3201612	0.0719	1.02	0.0833	A:G
AT3G10620	NUDT26	+	AT3G10620.1	27.4537894	2	3_3321356,3_3321513	0.123,0.113	0.591,0.479	0.0183,0.0798	A:G,A:G
AT3G10670	ABCI6	-	AT3G10670.1	30.607836	3	3_3335303,3_3335304,3_3335269	0.157,0.024,0.169	0.624,0.874,0.306	3.53e-05,0.0111,0.0162	T:C,T:C,T:C
AT3G10860	AT3G10860	+	AT3G10860.1,AT3G10860.2	2443.9114946,NA	9	3_3400495,3_3400483,3_3400526,3_3400504,3_3400560,3_3399912,3_3399924,3_3400581,3_3400492	0.0247,0.0352,0.0102,0.0127,0.035,0.00664,0.0324,0.0109,0.00747	0.429,0.352,0.648,0.499,0.322,0.414,0.271,1.15,0.392	3.97e-06,4.6e-05,6.79e-05,0.000107,0.000923,0.00403,0.0102,0.0108,0.0234	A:G,A:G,A:G,A:G,A:G,A:G,A:G,A:G,A:G
AT3G11130	CHC1	-	AT3G11130.1	9.4942436	4	3_3482934,3_3483123,3_3482529,3_3482494	0.259,0.0832,0.0152,0.0213	0.489,0.575,0.599,1.07	1.03e-08,0.00593,0.0104,0.0665	T:C,T:C,T:C,T:C
AT3G11250	RPP0C	+	AT3G11250.1	45.9622516	1	3_3522838	0.0413	1.02	0.0019	A:G
AT3G11510	RPS14B	-	AT3G11510.1	752.1673204	4	3_3624202,3_3623991,3_3624175,3_3623728	0.144,0.021,0.00323,0.00371	0.154,0.124,0.216,0.775	0.000193,0.00754,0.0811,0.0997	T:C,T:C,T:C,T:C
AT3G11630	BAS1	+	AT3G11630.1	449.4277368	7	3_3673945,3_3673986,3_3673957,3_3673959,3_3673928,3_3673932,3_3673958	0.19,0.123,0.042,0.0978,0.00867,0.00732,0.0152	0.409,0.507,0.577,0.395,0.79,0.567,0.423	2.3e-14,2.12e-10,4.83e-09,5.13e-05,0.00023,0.0548,0.0741	A:G,A:G,A:G,A:G,A:G,A:G,A:G
AT3G11710	ATKRS-1	-	AT3G11710.1	29.6154308	1	3_3703005	0.0195	1.01	0.0492	T:C
AT3G11830	CCT7	+	AT3G11830.1,AT3G11830.2	34.9916878,0.0285744	1	3_3735533	0.0231	0.224	0.0146	A:G
AT3G11940	RPS5B	-	AT3G11940.1,AT3G11940.2	601.6018636,NA	2	3_3778467,3_3778188	0.0128,0.051	0.274,0.1	0.00012,0.0448	T:C,T:C
AT3G12120	FAD2	-	AT3G12120.1	225.3419178	1	3_3862897	0.00524	0.792	0.0701	T:C
AT3G12260	AT3G12260	-	AT3G12260.1	323.88023	2	3_3909177,3_3909175	0.101,0.0174	0.63,1.31	8.36e-05,0.00882	T:C,T:C
AT3G12290	FOLD2	+	AT3G12290.1	63.5942494	1	3_3920269	0.0315	0.307	0.0588	A:G
AT3G12390	AT3G12390	+	AT3G12390.1	129.8324978	1	3_3943654	0.0334	0.902	0.0628	A:G
AT3G12800	SDRB	-	AT3G12800.1	48.081811	2	3_4063470,3_4063567	0.0383,0.0384	1.36,0.782	0.000844,0.0838	T:C,T:C
AT3G12965	AT3G12965	-	AT3G12965.1	NA	1	3_4137015	0.123	1.02	5.05e-07	T:C
AT3G13120	RPS10	-	AT3G13120.1,AT3G13120.2,AT3G13120.3	372.20857,NA	2	3_4220051,3_4219938	0.00688,0.0197	1.55,0.694	0.00236,0.0889	T:C,T:C
AT3G13226	AT3G13226	-	AT3G13226.1	4.7687372	1	3_4264531	0.16	1.49	0.00246	T:C
AT3G13410	AT3G13410	-	AT3G13410.1	62.0017454	1	3_4362214	0.0612	0.599	0.000493	T:C
AT3G13470	CPN60B2	+	AT3G13470.1	73.9154896	2	3_4392446,3_4392253	0.0414,0.00657	0.521,1.14	1.29e-06,0.000731	A:G,A:G
AT3G13490	OVA5	-	AT3G13490.1	12.0525612	2	3_4396847,3_4397337	0.131,0.0285	0.341,1.84	0.00285,0.0421	T:C,T:C
AT3G13560	AT3G13560	-	AT3G13560.1,AT3G13560.2,AT3G13560.3,AT3G13560.4,AT3G13560.5	7.6659016,NA	1	3_4425469	0.107	1.6	0.0622	T:C
AT3G13580	RPL7D	+	AT3G13580.1,AT3G13580.2,AT3G13580.3,AT3G13580.4,AT3G13580.5,AT3G13580.6,AT3G13580.7,AT3G13580.8,AT3G13580.9	101.4899614,NA	1	3_4433972	0.0142	0.286	0.0916	A:G
AT3G13670	AT3G13670	+	AT3G13670.1	17.4900054	1	3_4473424	0.0943	1.49	0.0433	A:G
AT3G13750	BGAL1	+	AT3G13750.1	24.8267088	1	3_4515793	0.0756	0.508	0.0067	A:G
AT3G13860	HSP60-3A	-	AT3G13860.1	9.990944	1	3_4562160	0.182	0.382	0.00634	T:C
AT3G13920	TIF4A-1	-	AT3G13920.5,AT3G13920.1,AT3G13920.3,AT3G13920.2,AT3G13920.4	115.2938096,31.8467284,0.206726,0,0.095896	3	3_4593557,3_4592551,3_4592570	0.0238,0.0868,0.0151	0.599,0.137,0.555	9.38e-06,0.0228,0.0311	T:C,T:C,T:C
AT3G13930	AT3G13930	+	AT3G13930.1	22.7681144	1	3_4596234	0.0422	0.549	0.0129	A:G
AT3G14110	FLU	-	AT3G14110.1,AT3G14110.2,AT3G14110.3	96.6863452,0.9656384,0.4446582	1	3_4677168	0.0143	0.521	0.042	T:C
AT3G14120	NUP107	+	AT3G14120.2,AT3G14120.3,AT3G14120.1	2.5850428,0	3	3_4684739,3_4684766,3_4684531	0.157,0.32,0.086	1.12,0.42,0.518	0.000406,0.0082,0.0969	A:G,A:G,A:G
AT3G14210	ESM1	+	AT3G14210.1,AT3G14210.2	209.944221,0	1	3_4730782	0.833	-1.25	0.0325	A:G
AT3G14415	GLO2	+	AT3G14415.1,AT3G14415.2	186.6789498,0.8703328	3	3_4820890,3_4818799,3_4820776	0.038,0.00796,0.0602	1.51,1.24,0.403	1.24e-06,7.3e-05,0.000391	A:G,A:G,A:G
AT3G14420	GLO1	+	AT3G14420.1,AT3G14420.6,AT3G14420.3,AT3G14420.5,AT3G14420.4	471.4035062,1.6528814,0.2450496,0.1492372,0	1	3_4823850	0.00117	0.8	0.0417	A:G
AT3G15000	MORF8	+	AT3G15000.1	71.2815392	2	3_5051732,3_5052205	0.0349,0.00878	0.458,0.814	0.00632,0.0714	A:G,A:G
AT3G15190	RPS20	+	AT3G15190.1	451.3240174	6	3_5117459,3_5117426,3_5117464,3_5117364,3_5117448,3_5117571	0.0626,0.0054,0.0305,0.00329,0.092,0.0365	0.317,0.488,0.312,1.28,0.212,0.97	0.000809,0.00338,0.00754,0.0102,0.0135,0.0698	A:G,A:G,A:G,A:G,A:G,A:G
AT3G15360	ATHM4	+	AT3G15360.1	449.217937	3	3_5189250,3_5189456,3_5189460	0.0959,0.0553,0.0331	0.321,0.413,0.649	4.72e-10,9.15e-05,0.0104	A:G,A:G,A:G
AT3G15520	CYP37	-	AT3G15520.1,AT3G15520.2	13.6824024,3.1521188	4	3_5249997,3_5250106,3_5250108,3_5250102	0.199,0.0658,0.0113,0.0229	0.737,0.614,1.08,0.773	6.5e-12,0.00249,0.00377,0.0963	T:C,T:C,T:C,T:C
AT3G15610	AT3G15610	-	AT3G15610.1	10.8450998	1	3_5291063	0.0849	0.732	0.0981	T:C
AT3G15640	COX5B-1	+	AT3G15640.1,AT3G15640.2	75.3561412,3.0604016	1	3_5299685	0.17	0.405	0.00127	A:G
AT3G15730	PLDALPHA1	+	AT3G15730.1	59.9629952	1	3_5330881	0.00811	1.27	0.0186	A:G
AT3G16240	TIP2-1	+	AT3G16240.1	565.6101906	1	3_5506685	0.00748	0.764	0.00165	A:G
AT3G16640	TCTP	-	AT3G16640.1	2428.0544728	8	3_5669687,3_5669702,3_5670200,3_5670119,3_5669988,3_5670073,3_5669957,3_5670308	0.0635,0.0125,0.13,0.00415,0.00243,0.00133,0.00212,0.0141	0.259,0.649,0.166,0.414,1.02,1.2,1.22,0.183	2.5e-08,2.21e-06,7.2e-05,0.000119,0.000171,0.00294,0.00384,0.0176	T:C,T:C,T:C,T:C,T:C,T:C,T:C,T:C
AT3G16770	RAP2-3	+	AT3G16770.1	65.4527308	1	3_5706406	0.0145	0.666	0.0585	A:G
AT3G16950	LPD1	-	AT3G16950.2,AT3G16950.1	6.1137384,5.6823868	1	3_5786674	0.13	0.205	0.0745	T:C
AT3G18060	AT3G18060	+	AT3G18060.1	14.2479606	1	3_6186194	0.0294	1.77	0.00675	A:G
AT3G18140	AT3G18140	-	AT3G18140.1,AT3G18140.2	24.8342028,0.4832744	1	3_6214103	0.0531	1.23	0.00946	T:C
AT3G18210	AT3G18210	-	AT3G18210.1,AT3G18210.2	12.3114868,NA	1	3_6239264	0.121	1.57	0.00028	T:C
AT3G18410	AT3G18410	+	AT3G18410.1	470.4377514	2	3_6324404,3_6324489	0.106,0.0139	0.296,1.73	2.06e-05,0.0412	A:G,A:G
AT3G18740	RPL30C	+	AT3G18740.1	1368.7884574	1	3_6453848	0.0356	0.57	1.28e-06	A:G
AT3G18820	RABG3F	+	AT3G18820.1	70.4226698	1	3_6485809	0.0202	1.68	0.0357	A:G
AT3G19760	RH2	+	AT3G19760.1	68.2539432	1	3_6865959	0.0123	0.874	0.0278	A:G
AT3G19820	DIM	-	AT3G19820.1,AT3G19820.2,AT3G19820.3	128.486919,NA	2	3_6880528,3_6879859	0.0477,0.016	0.59,0.784	1.57e-12,0.000146	T:C,T:C
AT3G19910	BBR	+	AT3G19910.1	15.0137884	1	3_6929294	0.151	0.589	0.0866	A:G
AT3G19960	VIII-1	+	AT3G19960.1,AT3G19960.3,AT3G19960.2	2.5022094,0.0239476,0.002004	1	3_6956088	0.0758	1.93	0.0979	A:G
AT3G20050	CCT1	-	AT3G20050.1	56.1180256	1	3_6998432	0.0643	0.478	0.00822	T:C
AT3G20230	AT3G20230	-	AT3G20230.1	80.7771474	1	3_7055611	0.0419	0.0267	0.0761	T:C
AT3G21110	PUR7	-	AT3G21110.1,AT3G21110.2,AT3G21110.3	11.8760268,NA	2	3_7404140,3_7404359	0.142,0.0509	0.461,1.69	0.0137,0.0984	T:C,T:C
AT3G21300	AT3G21300	-	AT3G21300.1	8.2931266	1	3_7493594	0.249	0.524	0.0458	T:C
AT3G22845	AT3G22845	+	AT3G22845.1,AT3G22845.2	59.2033926,0.6941092	2	3_8088560,3_8088450	0.088,0.0258	0.973,0.359	1.9e-05,0.0476	A:G,A:G
AT3G22890	APS1	+	AT3G22890.1	144.6447676	1	3_8114776	0.00328	2.49	0.0139	A:G
AT3G23490	CYN	-	AT3G23490.1,AT3G23490.3	70.606878,0.5052452	1	3_8424317	0.00899	1.65	0.0282	T:C
AT3G23600	AT3G23600	+	AT3G23600.1,AT3G23600.2	141.0409774,0.3154414	7	3_8475775,3_8474534,3_8475521,3_8475061,3_8475668,3_8475570,3_8475664	0.195,0.00391,0.0317,0.00948,0.0361,0.00434,0.0323	0.92,2.6,0.6,1.3,0.994,2.43,0.629	1e-08,3.2e-05,3.93e-05,0.000114,0.000545,0.0118,0.0121	A:G,A:G,A:G,A:G,A:G,A:G,A:G
AT3G23810	SAHH2	-	AT3G23810.1	117.9297022	1	3_8589609	0.00914	1.06	0.025	T:C
AT3G24170	ATGR1	-	AT3G24170.1,AT3G24170.2,AT3G24170.3	44.3175872,NA	3	3_8729682,3_8729706,3_8729954	0.0643,0.0442,0.0151	1.75,1.54,1.35	1.09e-06,0.000719,0.00268	T:C,T:C,T:C
AT3G24430	HCF101	-	AT3G24430.1	27.5749854	1	3_8868782	0.0286	1.51	0.027	T:C
AT3G24830	RPL13AB	+	AT3G24830.1	865.697343	1	3_9065867	0.0062	0.192	0.066	A:G
AT3G25120	AT3G25120	-	AT3G25120.1	20.6130192	1	3_9150528	0.145	0.7	1.03e-05	T:C
AT3G25230	FKBP62	+	AT3G25230.1,AT3G25230.2	7.5816898,2.9461808	1	3_9191186	0.076	1.45	0.0147	A:G
AT3G25480	STR4A	-	AT3G25480.1	33.4792114	3	3_9235424,3_9235643,3_9235313	0.126,0.0164,0.0426	0.669,0.705,1.28	1.18e-07,0.00851,0.092	T:C,T:C,T:C
AT3G25520	ATL5	-	AT3G25520.1,AT3G25520.2,AT3G25520.3	296.7916294,68.9560866,NA	4	3_9270627,3_9269944,3_9270271,3_9269517	0.356,0.007,0.0101,0.00678	0.321,0.351,0.458,1.01	4.87e-14,0.000365,0.0154,0.0978	T:C,T:C,T:C,T:C
AT3G25660	GATA	-	AT3G25660.1	26.0545544	4	3_9340836,3_9339655,3_9339882,3_9340041	0.0279,0.0217,0.0423,0.0236	0.865,1.82,0.849,1.04	0.00662,0.0311,0.0544,0.0994	T:C,T:C,T:C,T:C
AT3G25800	PP2AA2	-	AT3G25800.1,AT3G25800.2	12.0378114,0.0209618	3	3_9423301,3_9423298,3_9423215	0.0359,0.0459,0.0644	1.78,0.989,0.705	0.00672,0.0133,0.0248	T:C,T:C,T:C
AT3G25920	RPL15	-	AT3G25920.1	497.1345018	5	3_9491332,3_9492260,3_9491301,3_9491242,3_9491473	0.249,0.0436,0.123,0.0276,0.0272	0.454,0.423,0.51,0.621,0.438	1.95e-23,1.5e-12,1.17e-10,4.96e-05,0.0219	T:C,T:C,T:C,T:C,T:C
AT3G26420	RZ1A	+	AT3G26420.1	95.8850724	1	3_9672981	0.0343	0.185	0.00239	A:G
AT3G26710	CCB1	+	AT3G26710.1	75.7347706	1	3_9814431	0.0269	0.783	0.0223	A:G
AT3G27090	AT3G27090	+	AT3G27090.1,AT3G27090.2,AT3G27090.3	50.716582,NA	2	3_9991576,3_9991443	0.0958,0.0115	0.53,1.41	6.01e-05,0.0369	A:G,A:G
AT3G27240	CYC11	-	AT3G27240.1	42.2793042	1	3_10056052	0.116	0.281	0.0069	T:C
AT3G27280	PHB4	+	AT3G27280.1,AT3G27280.2	40.0680982,NA	1	3_10078313	0.0704	0.491	0.00678	A:G
AT3G27340	AT3G27340	+	AT3G27340.1,AT3G27340.4,AT3G27340.2,AT3G27340.3	33.6470848,0.8997842,0.8976174,0.4061398	1	3_10122685	0.0896	0.974	0.00416	A:G
AT3G27430	PBB1	+	AT3G27430.2,AT3G27430.3,AT3G27430.1	75.3004624,0.0446496,0.0158554	2	3_10154258,3_10154987	0.235,0.013	0.293,0.544	3.89e-05,0.00463	A:G,A:G
AT3G27740	CARA	-	AT3G27740.1,AT3G27740.2	36.511333,0	2	3_10281688,3_10282511	0.0911,0.0166	0.241,1.23	0.00585,0.0912	T:C,T:C
AT3G28460	AT3G28460	-	AT3G28460.1,AT3G28460.2,AT3G28460.3	23.365668,0.0992896,0	1	3_10672356	0.133	0.213	0.057	T:C
AT3G28500	RPP2C	+	AT3G28500.1	7.8671574	1	3_10682562	0.33	0.863	0.0209	A:G
AT3G28710	VHA-D1	-	AT3G28710.1	38.9004454	1	3_10774011	0.0196	1.53	3.59e-05	T:C
AT3G28900	RPL34C	-	AT3G28900.1	437.1872696	1	3_10904438	0.108	0.846	0.0465	T:C
AT3G41761	AT3G41761	+	AT3G41761.1	NA	1	3_14195933	0.646	-1.15	0.0127	A:G
AT3G41762	AT3G41762	-	AT3G41762.1	3.5387422	1	3_14197251	0.448	-0.954	1.04e-17	T:C
AT3G42050	VHA-H	-	AT3G42050.1	68.2416018	7	3_14228650,3_14231873,3_14229228,3_14229940,3_14229915,3_14228651,3_14228553	0.156,0.0318,0.0062,0.00696,0.0156,0.0596,0.0825	0.966,1.19,2.82,1.63,1.19,1.26,1.24	0.000262,0.000323,0.000598,0.0248,0.028,0.0315,0.0915	T:C,T:C,T:C,T:C,T:C,T:C,T:C
AT3G43520	FAX2	+	AT3G43520.1	55.7959838	1	3_15407295	0.0483	0.335	0.000278	A:G
AT3G43810	CAM7	-	AT3G43810.1,AT3G43810.3	303.9020116,3.3748606	1	3_15664537	0.014	1.31	0.00304	T:C
AT3G44010	RPS29A	-	AT3G44010.1,AT3G44010.2	3188.5584318,NA	3	3_15800146,3_15801133,3_15800028	0.0965,0.00166,0.019	0.328,1.35,1.19	7.45e-08,0.0283,0.0778	T:C,T:C,T:C
AT3G44110	ATJ3	-	AT3G44110.1,AT3G44110.2	92.8151616,0.0629716	1	3_15869182	0.0153	1.12	0.00233	T:C
AT3G44620	AT3G44620	+	AT3G44620.1,AT3G44620.2	35.000107,0.4674186	2	3_16195405,3_16195430	0.0639,0.0558	0.589,0.593	0.0116,0.0248	A:G,A:G
AT3G44890	RPL9	+	AT3G44890.1	357.761937	3	3_16388296,3_16387910,3_16387314	0.062,0.0148,0.00239	1,0.921,1.13	1.64e-12,3.53e-09,0.0899	A:G,A:G,A:G
AT3G45030	RPS20A	-	AT3G45030.1	494.220975	3	3_16472003,3_16472215,3_16471988	0.0184,0.00164,0.0112	0.416,1.69,0.24	4.55e-05,0.0225,0.0712	T:C,T:C,T:C
AT3G45050	AT3G45050	+	AT3G45050.2,AT3G45050.1,AT3G45050.3	67.232072,0.8286572,NA	4	3_16477094,3_16477128,3_16477255,3_16477332	0.188,0.0387,0.103,0.0731	0.907,1.21,2.41,0.912	7.37e-12,6.17e-05,9.96e-05,0.0342	A:G,A:G,A:G,A:G
AT3G45310	AT3G45310	-	AT3G45310.1,AT3G45310.2	14.5659454,0.025844	1	3_16628986	0.0152	1.21	0.0283	T:C
AT3G46010	ADF1	-	AT3G46010.1,AT3G46010.2	232.9492818,0.5430744	1	3_16909561	0.101	0.834	3.59e-06	T:C
AT3G46100	ATHRS1	-	AT3G46100.1	15.6850066	1	3_16928450	0.538	0.478	2.81e-06	T:C
AT3G46430	AT3G46430	+	AT3G46430.1	892.9831776	1	3_17088000	0.152	-0.0652	0.00215	A:G
AT3G46560	TIM9	+	AT3G46560.1	337.041582	1	3_17139352	0.0138	0.936	0.0513	A:G
AT3G46780	PTAC16	+	AT3G46780.1	233.0616376	2	3_17230970,3_17229091	0.023,0.00274	0.785,1.37	0.000133,0.00542	A:G,A:G
AT3G46830	RABA2C	-	AT3G46830.1,AT3G46830.2	33.7191914,NA	1	3_17246758	0.0695	0.959	0.0092	T:C
AT3G47290	PLC8	+	AT3G47290.1	15.6385184	2	3_17423423,3_17423444	0.0995,0.107	1.19,0.572	0.0521,0.0558	A:G,A:G
AT3G47390	PYRR	+	AT3G47390.2,AT3G47390.1	3.1805374,0.0778406	1	3_17463467	0.115	1.34	0.0362	A:G
AT3G47470	LHCA4	-	AT3G47470.1	5567.5574872	1	3_17494251	0.00155	1.15	1.22e-05	T:C
AT3G47650	AT3G47650	+	AT3G47650.1	459.0496562	6	3_17570334,3_17570267,3_17570300,3_17570472,3_17570360,3_17569741	0.31,0.0168,0.0165,0.0643,0.00489,0.0212	0.25,0.656,0.587,0.405,0.823,0.53	4.49e-06,0.000141,0.00108,0.0135,0.0207,0.06	A:G,A:G,A:G,A:G,A:G,A:G
AT3G47810	VPS29	-	AT3G47810.1,AT3G47810.2,AT3G47810.3	58.8211272,NA	3	3_17638926,3_17637343,3_17637399	0.126,0.165,0.107	0.361,0.304,0.27	0.000311,0.0707,0.0961	T:C,T:C,T:C
AT3G47833	SDH7A	+	AT3G47833.1	146.9906158	1	3_17649814	0.0236	0.74	0.06	A:G
AT3G47836	AT3G47836	-	AT3G47836.1,AT3G47836.2	292.0326984,1.2693132	1	3_17650479	0.0614	0.358	0.00366	T:C
AT3G48140	T24C20_20	+	AT3G48140.1	2059.8162326	1	3_17779444	0.0265	0.645	0.000176	A:G
AT3G48210	AT3G48210	+	AT3G48210.1	10.6417296	1	3_17851494	0.153	1.25	0.00517	A:G
AT3G48730	GSA2	+	AT3G48730.1	110.3657042	1	3_18050647	0.13	0.04	0.012	A:G
AT3G48930	RPS11A	-	AT3G48930.1	1160.0995142	1	3_18141017	0.0193	0.46	0.00159	T:C
AT3G49010	RPL13B	-	AT3G49010.1,AT3G49010.4,AT3G49010.5	797.6087184,3.8515968,0.442656	5	3_18167057,3_18166833,3_18166950,3_18166870,3_18167137	0.019,0.0189,0.00346,0.00964,0.00141	0.436,1.08,1.85,1.56,0.907	1.55e-07,0.0283,0.0511,0.0707,0.08	T:C,T:C,T:C,T:C,T:C
AT3G49390	CID10	-	AT3G49390.1,AT3G49390.2,AT3G49390.3	12.5312586,NA	1	3_18314841	0.0572	0.765	0.0292	T:C
AT3G49430	SR34A	+	AT3G49430.1,AT3G49430.2	47.3648858,0.0073446	6	3_18334337,3_18334501,3_18334483,3_18334857,3_18334861,3_18334313	0.317,0.147,0.0417,0.0899,0.0345,0.0133	0.411,0.523,1.17,1.1,1.56,0.798	1.63e-16,2.07e-10,6.17e-06,1.3e-05,0.00718,0.0537	A:G,A:G,A:G,A:G,A:G,A:G
AT3G49680	BCAT3	+	AT3G49680.1,AT3G49680.2	61.7363364,0.7258328	1	3_18425586	0.0993	0.609	0.0067	A:G
AT3G49910	RPL26A	+	AT3G49910.1	1756.3299162	3	3_18504754,3_18504800,3_18504794	0.032,0.0161,0.0121	0.0541,0.267,0.229	0.00985,0.0765,0.0889	A:G,A:G,A:G
AT3G50790	AT3G50790	-	AT3G50790.1,AT3G50790.2	10.7588476,NA	1	3_18881371	0.134	0.872	0.0178	T:C
AT3G51820	CHLG	-	AT3G51820.1	64.3830342	1	3_19216185	0.0364	0.762	0.0321	T:C
AT3G51840	ACX4	-	AT3G51840.1	27.0009656	1	3_19225512	0.257	0.718	0.00174	T:C
AT3G52090	NRPB11	-	AT3G52090.1,AT3G52090.2	165.604513,0.0378886	1	3_19318034	0.141	0.285	0.00504	T:C
AT3G52150	AT3G52150	+	AT3G52150.1,AT3G52150.2	310.4012506,NA	1	3_19342353	0.00184	1.09	0.0903	A:G
AT3G52300	ATPQ	+	AT3G52300.1,AT3G52300.2	470.5197022,0.22301	2	3_19398115,3_19398150	0.0195,0.0376	0.704,0.309	0.00042,0.00187	A:G,A:G
AT3G52380	CP33	+	AT3G52380.1	120.4986136	1	3_19422819	0.03	0.62	6.08e-05	A:G
AT3G52580	RPS14C	+	AT3G52580.1	235.4591666	3	3_19504792,3_19504321,3_19504428	0.165,0.0859,0.00593	0.875,0.429,1.74	1.82e-09,2.24e-05,0.0181	A:G,A:G,A:G
AT3G52590	RPL40B	+	AT3G52590.1	1945.6567852	6	3_19506699,3_19506684,3_19506102,3_19506553,3_19506682,3_19506517	0.104,0.367,0.0156,0.0217,0.00704,0.00836	0.394,0.319,0.337,0.249,0.693,0.314	3.16e-11,6.82e-07,4.6e-05,0.000721,0.000734,0.00378	A:G,A:G,A:G,A:G,A:G,A:G
AT3G52880	ATMDAR1	-	AT3G52880.1,AT3G52880.2	138.4425354,0.1345866	1	3_19601546	0.0108	0.834	9.76e-05	T:C
AT3G52930	AT3G52930	-	AT3G52930.1	197.4261698	2	3_19627227,3_19627637	0.225,0.0179	0.365,0.16	4.53e-06,0.021	T:C,T:C
AT3G53020	RPL24B	-	AT3G53020.1	1057.5360976	4	3_19660777,3_19660786,3_19660699,3_19660830	0.146,0.0224,0.0261,0.00679	0.336,0.553,0.482,0.223	1.61e-17,9.2e-06,0.000415,0.0871	T:C,T:C,T:C,T:C
AT3G53110	RH38	+	AT3G53110.1	20.4298348	1	3_19690435	0.118	0.28	0.00219	A:G
AT3G53430	RPL12B	-	AT3G53430.1	844.538729	1	3_19810264	0.0212	0.216	0.0031	T:C
AT3G53460	CP29A	-	AT3G53460.1,AT3G53460.4	493.7817218,0.674286	3	3_19820874,3_19819709,3_19819710	0.00268,0.014,0.00286	0.965,0.506,0.645	0.00033,0.00279,0.0246	T:C,T:C,T:C
AT3G53500	RS2Z32	-	AT3G53500.2,AT3G53500.1	59.6061702,0	1	3_19834824	0.0294	0.225	0.0771	T:C
AT3G53580	DAPF	+	AT3G53580.1	61.4619616	2	3_19866858,3_19866972	0.0693,0.0159	0.442,1.14	0.000244,0.0485	A:G,A:G
AT3G53630	AT3G53630	+	AT3G53630.1,AT3G53630.2	37.2219334,0.167417	3	3_19885653,3_19885652,3_19885701	0.017,0.0222,0.0485	12.6,2.18,0.638	0.00942,0.0279,0.0557	A:G,A:G,A:G
AT3G53670	AT3G53670	+	AT3G53670.1,AT3G53670.2	13.4294528,NA	1	3_19892092	0.0621	1.19	0.0869	A:G
AT3G53740	RPL36B	-	AT3G53740.2,AT3G53740.1	1999.7566002,0.763757	1	3_19914240	0.000953	1.64	0.00249	T:C
AT3G53870	RPS3B	+	AT3G53870.1	457.670403	3	3_19952703,3_19952733,3_19952731	0.0251,0.00721,0.00245	0.469,1.05,0.777	2.08e-05,0.000592,0.0491	A:G,A:G,A:G
AT3G53890	RPS21B	-	AT3G53890.1,AT3G53890.2	2657.4674284,NA	2	3_19955856,3_19955597	0.00886,0.00576	-0.0154,0.0411	0.00479,0.0978	T:C,T:C
AT3G54210	RPL17	-	AT3G54210.1	441.8075622	2	3_20067704,3_20067763	0.0144,0.00217	0.309,1.64	0.0107,0.057	T:C,T:C
AT3G54360	AT3G54360	-	AT3G54360.1,AT3G54360.2	35.0673938,NA	1	3_20128554	0.0618	0.5	0.0491	T:C
AT3G54560	H2AV	+	AT3G54560.1,AT3G54560.2	294.6850276,NA	1	3_20197544	0.0528	0.964	3.71e-05	A:G
AT3G54660	EMB2360	-	AT3G54660.1	42.895022	2	3_20230590,3_20232868	0.0716,0.0119	0.354,1.32	0.000172,0.0602	T:C,T:C
AT3G54820	PIP2-5	+	AT3G54820.1	20.8103974	1	3_20303746	0.0909	0.797	0.0177	A:G
AT3G54890	LHCA1	-	AT3G54890.1,AT3G54890.4,AT3G54890.2,AT3G54890.3	5446.4547466,10.8267314,2.7722486,0.822549	2	3_20340925,3_20340202	0.00673,0.00129	0.498,0.607	0.0175,0.0178	T:C,T:C
AT3G55170	RPL35C	-	AT3G55170.1,AT3G55170.3	191.4671946,55.4483646	2	3_20453094,3_20453185	0.154,0.0103	0.331,2.02	0.00316,0.00331	T:C,T:C
AT3G55280	RPL23AB	+	AT3G55280.1,AT3G55280.3	208.134799,0.027785	1	3_20501362	0.04	0.323	0.022	A:G
AT3G55330	PPL1	-	AT3G55330.1	61.2251066	1	3_20514072	0.00533	3.6	0.0503	T:C
AT3G55400	OVA1	-	AT3G55400.1,AT3G55400.2	16.2075496,0.359112	2	3_20535888,3_20535821	0.217,0.271	0.938,0.408	1.58e-07,0.00311	T:C,T:C
AT3G55440	CTIMC	+	AT3G55440.1	466.5274018	3	3_20556090,3_20554547,3_20556187	0.104,0.0232,0.00936	0.176,0.17,0.759	1.64e-06,0.000546,0.0627	A:G,A:G,A:G
AT3G55460	SCL30	+	AT3G55460.1	59.302105	1	3_20563063	0.0212	0.261	0.0102	A:G
AT3G55620	EIF6-2	+	AT3G55620.1	48.0440972	1	3_20636147	0.0244	0.609	0.0599	A:G
AT3G55750	RPL35AD	+	AT3G55750.1	1060.5025274	5	3_20699374,3_20699520,3_20699518,3_20699542,3_20700015	0.236,0.0341,0.0673,0.00391,0.172	0.269,0.184,0.194,1.61,1.07	3.13e-09,6.12e-05,0.000125,0.0127,0.0392	A:G,A:G,A:G,A:G,A:G
AT3G56020	RPL41E	-	AT3G56020.1	2348.9596648	3	3_20790848,3_20790863,3_20790887	0.0721,0.0139,0.0133	0.182,0.36,0.351	0.00144,0.0183,0.0626	T:C,T:C,T:C
AT3G56120	AT3G56120	+	AT3G56120.1	5.387592	1	3_20826164	0.0596	1.89	0.0588	A:G
AT3G56130	AT3G56130	+	AT3G56130.1,AT3G56130.2,AT3G56130.5,AT3G56130.4,AT3G56130.3	49.458503,0.990266,0.227769,0.0627124,0.0209562	3	3_20829045,3_20829069,3_20828834	0.139,0.0672,0.00762	0.821,0.88,0.696	8.09e-12,0.00375,0.0267	A:G,A:G,A:G
AT3G56150	TIF3C1	-	AT3G56150.1,AT3G56150.2	30.8210142,NA	1	3_20834083	0.0116	0.811	0.0594	T:C
AT3G56160	BASS4	-	AT3G56160.3,AT3G56160.2,AT3G56160.4,AT3G56160.1,AT3G56160.5	13.1130988,0.307054,0.1990116,0.030453,0.015467	1	3_20837715	0.248	0.599	1.76e-05	T:C
AT3G56190	ASNAP2	-	AT3G56190.1,AT3G56190.2	46.714062,0	1	3_20846106	0.0693	0.744	0.000206	T:C
AT3G56340	RPS26C	-	AT3G56340.1	843.5889926	1	3_20892297	0.00666	1.15	0.0219	T:C
AT3G56680	AT3G56680	+	AT3G56680.1	31.668075	1	3_20992183	0.0116	1.06	0.068	A:G
AT3G56800	CAM2	-	AT3G56800.1	272.5544324	2	3_21034971,3_21034968	0.0449,0.0137	0.563,0.463	0.000159,0.0434	T:C,T:C
AT3G56900	AAAS	+	AT3G56900.1	4.1895518	1	3_21070180	0.000633	2.65	0.093	A:G
AT3G56910	PSRP5	-	AT3G56910.1	1128.9250568	2	3_21069871,3_21069656	0.00411,0.00104	0.764,1.38	6.25e-05,0.0243	T:C,T:C
AT3G57290	EIF3E	-	AT3G57290.1	56.1503834	3	3_21196831,3_21196868,3_21196838	0.237,0.215,0.112	0.37,0.356,0.354	1.5e-07,1.8e-05,0.000372	T:C,T:C,T:C
AT3G58500	PP2A3	-	AT3G58500.1	68.2705874	1	3_21635533	0.0733	0.565	2.8e-07	T:C
AT3G58610	AT3G58610	+	AT3G58610.1,AT3G58610.2,AT3G58610.3	185.2181256,NA	3	3_21674446,3_21672824,3_21674489	0.0564,0.00302,0.00463	0.241,1.13,0.564	1.28e-07,0.0304,0.0683	A:G,A:G,A:G
AT3G58730	VHA-D	-	AT3G58730.1	90.2572876	3	3_21718840,3_21718517,3_21718432	0.0614,0.127,0.0219	1.18,0.451,0.971	1.98e-18,9.18e-08,0.0131	T:C,T:C,T:C
AT3G59020	AT3G59020	-	AT3G59020.2,AT3G59020.1	6.842453,0.1258554	1	3_21810827	0.0909	1.92	0.00368	T:C
AT3G59540	RPL38B	-	AT3G59540.1	2192.68345	8	3_21995863,3_21995848,3_21995906,3_21996225,3_21995896,3_21996283,3_21995907,3_21996302	0.378,0.244,0.0796,0.00963,0.00994,0.0132,0.00265,0.0012	0.404,0.325,0.41,0.508,0.395,0.311,0.914,2.69	1.95e-23,5.7e-12,3.05e-09,0.000569,0.00119,0.00517,0.0527,0.0643	T:C,T:C,T:C,T:C,T:C,T:C,T:C,T:C
AT3G59920	GDI2	+	AT3G59920.1	43.9425298	3	3_22138039,3_22138007,3_22138250	0.142,0.00569,0.0386	0.468,1.46,0.924	1.55e-06,0.0244,0.0742	A:G,A:G,A:G
AT3G59970	MTHFR1	+	AT3G59970.3,AT3G59970.2,AT3G59970.1	82.9248868,0.0150942,0.013648	1	3_22154334	0.0129	1.21	0.00783	A:G
AT3G60190	DRP1E	-	AT3G60190.1	10.7598994	1	3_22246440	0.0305	1.09	0.0363	T:C
AT3G60210	AT3G60210	-	AT3G60210.1	107.2609324	1	3_22251333	0.261	0.129	0.0264	T:C
AT3G60245	RPL37AC	+	AT3G60245.1	5049.101887	3	3_22269586,3_22269712,3_22269581	0.0342,0.000663,0.0053	0.493,2.31,0.206	3.14e-07,0.0248,0.0291	A:G,A:G,A:G
AT3G60370	FKBP20-2	-	AT3G60370.1,AT3G60370.2	18.7967142,11.6495242	1	3_22315397	0.0572	0.93	1.79e-05	T:C
AT3G60600	PVA11	+	AT3G60600.1,AT3G60600.3,AT3G60600.2	60.582604,0.7022616,0	1	3_22400543	0.0193	0.556	0.0178	A:G
AT3G60770	RPS13A	-	AT3G60770.1	671.5948976	1	3_22460410	0.0139	0.431	0.0311	T:C
AT3G61110	RPS27B	+	AT3G61110.1	1699.5037814	1	3_22612550	0.0231	0.229	0.000201	A:G
AT3G61240	RH12	+	AT3G61240.1,AT3G61240.2	12.2841818,NA	1	3_22669125	0.0373	1.21	0.0793	A:G
AT3G61470	LHCA2	+	AT3G61470.1	2538.0030256	7	3_22747126,3_22747042,3_22747091,3_22747050,3_22747044,3_22747090,3_22746234	0.104,0.014,0.00499,0.0113,0.00875,0.0042,0.00116	0.468,0.379,1.26,0.475,0.525,1.02,1.09	2.3e-14,1.71e-07,1.77e-07,2.56e-06,0.000114,0.0011,0.0188	A:G,A:G,A:G,A:G,A:G,A:G,A:G
AT3G62030	CYP20-3	+	AT3G62030.2,AT3G62030.3,AT3G62030.1	515.0956074,1.0670424,0	13	3_22974827,3_22975047,3_22974469,3_22975226,3_22974651,3_22974080,3_22974665,3_22974658,3_22974995,3_22975231,3_22975225,3_22973992,3_22973707	0.0288,0.0474,0.00525,0.0402,0.00253,0.0014,0.00558,0.00328,0.00753,0.00462,0.00419,0.00432,0.01	0.607,0.328,0.7,0.811,0.907,1.17,0.57,0.867,0.509,1.87,2.29,0.386,0.277	2.64e-10,3.59e-08,9.34e-05,0.000142,0.000186,0.00368,0.00402,0.00412,0.00661,0.0377,0.0626,0.0715,0.0776	A:G,A:G,A:G,A:G,A:G,A:G,A:G,A:G,A:G,A:G,A:G,A:G,A:G
AT3G62120	AT3G62120	-	AT3G62120.1,AT3G62120.3,AT3G62120.2	38.1607756,0,NA	2	3_23001438,3_23003803	0.011,0.0202	1.27,0.491	0.041,0.0537	T:C,T:C
AT3G62250	RPS27AC	+	AT3G62250.1	1059.1699182	3	3_23037592,3_23037596,3_23037565	0.00769,0.0342,0.00782	0.699,0.0956,0.184	0.0048,0.0684,0.0759	A:G,A:G,A:G
AT3G62290	ARFA1E	+	AT3G62290.1,AT3G62290.2,AT3G62290.3	500.8543506,NA	2	3_23053043,3_23053061	0.00583,0.0815	0.688,-0.0135	0.000371,0.0713	A:G,A:G
AT3G62400	AT3G62400	+	AT3G62400.2	59.3364824	1	3_23090601	0.0582	0.531	0.0228	A:G
AT3G62790	AT3G62790	-	AT3G62790.1	297.7435936	1	3_23223354	0.0229	0.611	0.0743	T:C
AT3G62840	AT3G62840	-	AT3G62840.1,AT3G62840.2	220.8794752,105.971568	1	3_23236017	0.00404	0.852	0.00701	T:C
AT3G63170	FAP1	+	AT3G63170.1	26.4153178	2	3_23334785,3_23335951	0.0241,0.0462	0.757,1.04	0.0678,0.0769	A:G,A:G
AT3G63190	RRF	-	AT3G63190.1	92.2910368	1	3_23342846	0.123	0.12	0.0107	T:C
AT3G63410	VTE3	-	AT3G63410.1	209.8805166	2	3_23415960,3_23416301	0.036,0.0168	-0.0213,0.0927	0.0248,0.0494	T:C,T:C
AT3G63460	SEC31B	-	AT3G63460.1,AT3G63460.2,AT3G63460.3	8.8004138,1.0342366,0.0078298	3	3_23433641,3_23432588,3_23431099	0.0513,0.0326,0.0203	1.58,0.887,1.33	0.000116,0.0355,0.0989	T:C,T:C,T:C
AT3G63490	RPL1	+	AT3G63490.1,AT3G63490.2	247.116208,0.466963	6	3_23446077,3_23446170,3_23446079,3_23446084,3_23446109,3_23444839	0.292,0.0878,0.0458,0.0217,0.0256,0.0539	0.224,0.247,0.345,0.317,0.223,0.0635	9.77e-26,3.21e-08,6.88e-07,0.000674,0.0241,0.0896	A:G,A:G,A:G,A:G,A:G,A:G
AT3G63540	AT3G63540	-	AT3G63540.1	760.033095	1	3_23459582	0.0034	1.13	0.00162	T:C
AT4G00100	RPS13B	+	AT4G00100.1	623.671559	13	4_38150,4_37541,4_38139,4_37342,4_37560,4_37275,4_37537,4_37663,4_37559,4_37125,4_37804,4_37776,4_37741	0.0293,0.00863,0.0362,0.0211,0.00481,0.00927,0.00516,0.00318,0.00446,0.0261,0.00136,0.00398,0.0028	0.716,0.604,0.406,0.387,0.971,0.678,0.551,1.04,0.805,0.55,1.45,0.409,0.941	1.23e-10,7.77e-06,5.71e-05,7.45e-05,0.0011,0.00443,0.0101,0.0113,0.0131,0.0218,0.0351,0.0759,0.0906	A:G,A:G,A:G,A:G,A:G,A:G,A:G,A:G,A:G,A:G,A:G,A:G,A:G
AT4G00560	AT4G00560	-	AT4G00560.2,AT4G00560.1,AT4G00560.4,AT4G00560.3	7.7812938,6.3528206,0.1034754,0.043973	2	4_240842,4_242175	0.0858,0.0298	0.983,1.32	0.0026,0.0142	T:C,T:C
AT4G00585	AT4G00585	-	AT4G00585.1	365.9157976	8	4_251089,4_251084,4_251065,4_251155,4_251090,4_251086,4_251124,4_251087	0.547,0.148,0.096,0.412,0.0257,0.0283,0.115,0.0385	0.435,1.13,0.982,0.141,1.51,1.64,0.323,1.22	3.82e-09,1.53e-06,0.000353,0.0013,0.0172,0.0303,0.0304,0.0671	T:C,T:C,T:C,T:C,T:C,T:C,T:C,T:C
AT4G00810	RPP1B	-	AT4G00810.1,AT4G00810.2	1208.6718126,NA	1	4_346444	0.0217	0.0662	0.018	T:C
AT4G01050	STR4	+	AT4G01050.2,AT4G01050.1	147.749029,0	8	4_458245,4_458188,4_458209,4_458244,4_458239,4_457375,4_457327,4_457354	0.207,0.0447,0.0086,0.0246,0.0021,0.00707,0.00114,0.00198	0.672,1.09,1.12,0.897,1.29,0.814,1.71,1.1	3.08e-20,2.8e-16,0.000102,0.000217,0.0278,0.0332,0.0719,0.0901	A:G,A:G,A:G,A:G,A:G,A:G,A:G,A:G
AT4G01100	ADNT1	+	AT4G01100.1,AT4G01100.2,AT4G01100.3	73.1927474,0.2416842,0.0385452	1	4_479576	0.133	0.195	0.0182	A:G
AT4G01150	CURT1A	+	AT4G01150.1,AT4G01150.2	1041.0214456,828.169401	6	4_494457,4_494483,4_493671,4_494612,4_494646,4_493668	0.0311,0.0015,0.0111,0.00187,0.0042,0.0158	0.312,1.51,0.738,0.855,0.404,0.467	2.41e-08,0.00145,0.0171,0.019,0.0253,0.0444	A:G,A:G,A:G,A:G,A:G,A:G
AT4G01310	RPL5	-	AT4G01310.1	290.0154436	1	4_545348	0.00244	1.25	0.0678	T:C
AT4G01320	FACE1	+	AT4G01320.1,AT4G01320.2	16.903763,0	1	4_548996	0.0303	1.3	0.0705	A:G
AT4G01690	PPOX1	+	AT4G01690.1,AT4G01690.2	66.2613194,0.013954	3	4_732100,4_732291,4_732105	0.189,0.201,0.00388	0.506,0.538,1.91	1.31e-16,4.72e-06,0.0341	A:G,A:G,A:G
AT4G02060	MCM7	+	AT4G02060.1,AT4G02060.2	10.5397916,NA	1	4_904212	0.085	0.423	0.0992	A:G
AT4G02230	RPL19C	-	AT4G02230.1	165.962529	1	4_979339	0.0717	0.38	0.00328	T:C
AT4G02290	AtGH9B13	-	AT4G02290.1,AT4G02290.2	7.1502612,0.4370414	1	4_1002617	0.127	1.82	0.0497	T:C
AT4G02370	AT4G02370	+	AT4G02370.1	39.3098332	1	4_1042971	0.119	0.539	0.0721	A:G
AT4G02405	AT4G02405	-	AT4G02405.1,AT4G02405.2	3.998249,0.0142086	1	4_1058220	0.0864	1.16	0.0144	T:C
AT4G02450	AT4G02450	-	AT4G02450.1,AT4G02450.2	184.3979908,0.5397736	2	4_1075175,4_1073996	0.057,0.0232	0.38,0.395	1.39e-09,0.00756	T:C,T:C
AT4G02570	CUL1	+	AT4G02570.1,AT4G02570.2,AT4G02570.3,AT4G02570.4	22.1977868,NA	1	4_1130858	0.0261	2.04	0.000146	A:G
AT4G02580	AT4G02580	+	AT4G02580.1	87.2428526	1	4_1136967	0.0216	0.782	0.0508	A:G
AT4G03280	PETC	+	AT4G03280.1,AT4G03280.2	798.5497166,0	2	4_1441449,4_1441448	0.247,0.00299	0.355,0.557	1.53e-13,0.0602	A:G,A:G
AT4G03520	ATHM2	-	AT4G03520.1,AT4G03520.2	218.5664478,207.1722048	4	4_1563869,4_1562652,4_1562655,4_1562479	0.0092,0.00393,0.00313,0.14	0.731,1.68,1.09,0.401	0.00293,0.00919,0.0262,0.0296	T:C,T:C,T:C,T:C
AT4G04640	ATPC1	-	AT4G04640.1	313.6215664	1	4_2350673	0.0362	0.644	1.72e-06	T:C
AT4G04910	NSF	-	AT4G04910.1	7.3887122	1	4_2490004	0.152	1.25	0.00158	T:C
AT4G05530	SDRA	+	AT4G05530.1	26.3414922	2	4_2818002,4_2817567	0.146,0.106	0.75,0.664	5.31e-05,0.0807	A:G,A:G
AT4G06701	AT4G06701	-	AT4G06701.1,AT4G06701.2,AT4G06701.3,AT4G06701.4,AT4G06701.5	NA	1	4_3940302	0.042	0.841	0.00161	T:C
AT4G08280	AT4G08280	+	AT4G08280.2,AT4G08280.1	31.3341348,13.4165062	7	4_5231932,4_5231867,4_5231957,4_5231916,4_5231947,4_5231909,4_5231905	0.15,0.064,0.305,0.0791,0.0746,0.142,0.0222	0.636,0.502,0.622,0.855,1.15,0.196,0.592	0.000411,0.000426,0.000826,0.00102,0.00138,0.0314,0.0466	A:G,A:G,A:G,A:G,A:G,A:G,A:G
AT4G09040	AT4G09040	-	AT4G09040.1,AT4G09040.2	42.2219132,0	1	4_5795868	0.0341	0.401	0.0653	T:C
AT4G09320	NDPK1	+	AT4G09320.1	1239.3260094	2	4_5924187,4_5924337	0.021,0.0192	0.232,0.229	0.00112,0.0151	A:G,A:G
AT4G09800	RPS18A	+	AT4G09800.1	552.0293506	2	4_6174628,4_6174680	0.0396,0.399	0.131,0.0761	0.0299,0.0387	A:G,A:G
AT4G10300	AT4G10300	+	AT4G10300.1	178.7918458	1	4_6385959	0.0409	1.03	0.00116	A:G
AT4G10320	AT4G10320	-	AT4G10320.1	10.5512898	1	4_6398427	0.0629	0.685	0.0018	T:C
AT4G10340	LHCB5	+	AT4G10340.1	5212.8616264	7	4_6409319,4_6409068,4_6408521,4_6409444,4_6408300,4_6409052,4_6409280	0.00493,0.0139,0.00032,0.00122,0.00128,0.000247,0.00141	0.305,0.279,2.35,0.601,0.424,2.31,0.273	0.00167,0.00742,0.0238,0.0269,0.0327,0.0705,0.095	A:G,A:G,A:G,A:G,A:G,A:G,A:G
AT4G11010	NDPK3	-	AT4G11010.1	166.5995704	6	4_6733264,4_6732834,4_6732887,4_6732992,4_6733298,4_6733867	0.0222,0.0112,0.048,0.00959,0.00695,0.00293	0.967,0.922,0.403,0.648,0.885,1.17	7.36e-06,9.6e-05,0.000172,0.0383,0.04,0.0626	T:C,T:C,T:C,T:C,T:C,T:C
AT4G11420	TIF3A1	-	AT4G11420.1	19.0944872	4	4_6947896,4_6948181,4_6947789,4_6947788	0.169,0.0677,0.0619,0.0146	0.175,0.229,0.743,1.24	0.000879,0.0019,0.00762,0.0117	T:C,T:C,T:C,T:C
AT4G12060	AT4G12060	-	AT4G12060.1	65.3474554	2	4_7228278,4_7228308	0.044,0.0816	0.965,0.245	9.1e-06,0.0551	T:C,T:C
AT4G12800	PSAL	+	AT4G12800.2,AT4G12800.1	1120.3649088,982.8038828	2	4_7522590,4_7521504	0.0252,0.00298	0.75,0.731	2.14e-05,0.00137	A:G,A:G
AT4G13170	RPL13AC	-	AT4G13170.1	143.4966988	1	4_7655257	0.00963	0.433	0.0744	T:C
AT4G13430	IIL1	-	AT4G13430.1	121.7039	1	4_7804689	0.0183	0.791	9.3e-05	T:C
AT4G13520	SMAP1	+	AT4G13520.1,AT4G13520.2	1320.2819068,NA	2	4_7864559,4_7864558	0.0859,0.104	0.222,0.11	2.03e-11,0.00132	A:G,A:G
AT4G13590	AT4G13590	-	AT4G13590.1,AT4G13590.2	34.8132796,0.009214	2	4_7901595,4_7901427	0.0218,0.0125	0.68,-0.289	0.0753,0.0753	T:C,T:C
AT4G13670	PTAC5	+	AT4G13670.1,AT4G13670.3,AT4G13670.2	22.5836224,2.4483146,0.384646	2	4_7950387,4_7948931	0.115,0.153	0.333,0.341	0.0155,0.0808	A:G,A:G
AT4G13720	AT4G13720	-	AT4G13720.1,AT4G13720.2	20.2519418,12.2222216	1	4_7967263	0.0447	1.13	0.000126	T:C
AT4G13730	AT4G13730	+	AT4G13730.1,AT4G13730.3,AT4G13730.2	3.5814034,0	1	4_7972007	0.0909	1.6	0.0583	A:G
AT4G14160	AT4G14160	+	AT4G14160.2,AT4G14160.3,AT4G14160.1	10.7220664,0.04096,0.0361816	1	4_8171855	0.113	0.739	0.00118	A:G
AT4G14320	RPL36AB	-	AT4G14320.1	1223.0774972	1	4_8242712	0.214	0.483	1.02e-13	T:C
AT4G14420	AT4G14420	-	AT4G14420.1	149.2204816	3	4_8302072,4_8302067,4_8302098	0.0612,0.0367,0.0223	0.444,0.99,0.995	0.0206,0.0233,0.0602	T:C,T:C,T:C
AT4G14710	ARD3	-	AT4G14710.1,AT4G14710.5,AT4G14710.4,AT4G14710.6,AT4G14710.3	38.7631988,0.0805694,0.0251126,0	1	4_8424912	0.0669	0.345	0.0509	T:C
AT4G14800	PBD2	+	AT4G14800.1,AT4G14800.2	75.082327,0.3859326	1	4_8500522	0.0688	0.445	0.00137	A:G
AT4G14880	OASA1	-	AT4G14880.1,AT4G14880.2,AT4G14880.3,AT4G14880.4,AT4G14880.5	216.3199418,NA	4	4_8519360,4_8520032,4_8519828,4_8518632	0.00328,0.0174,0.0016,0.00268	1.53,0.418,1,0.879	0.021,0.0237,0.0662,0.0889	T:C,T:C,T:C,T:C
AT4G14910	HISN5B	-	AT4G14910.1,AT4G14910.3,AT4G14910.2	10.7669018,3.4849472,0.2671172	1	4_8528435	0.0224	2.86	0.0479	T:C
AT4G14960	TUBA6	-	AT4G14960.2,AT4G14960.1	152.999574,85.3697346	6	4_8549631,4_8550275,4_8549632,4_8549633,4_8549634,4_8548808	0.0188,0.00249,0.00543,0.00801,0.00261,0.00283	0.825,3.28,1.38,0.963,1.77,0.75	6.57e-07,0.00015,0.000266,0.000325,0.0324,0.0853	T:C,T:C,T:C,T:C,T:C,T:C
AT4G15510	PPD1	+	AT4G15510.1,AT4G15510.2,AT4G15510.3	26.3231646,0.5892254,0	1	4_8861617	0.0174	12.4	0.00876	A:G
AT4G15910	ATDI21	+	AT4G15910.1	770.6080394	1	4_9028524	0.0187	0.645	0.0558	A:G
AT4G15940	AT4G15940	+	AT4G15940.1	15.6222846	1	4_9040082	0.046	1.38	0.0321	A:G
AT4G16155	LPD2	-	AT4G16155.1	17.8494828	2	4_9154532,4_9154375	0.0553,0.05	0.717,0.449	0.00627,0.031	T:C,T:C
AT4G16370	ATOPT3	-	AT4G16370.1	46.6778418	1	4_9247863	0.0119	0.885	0.0646	T:C
AT4G16450	AT4G16450	+	AT4G16450.1,AT4G16450.2	379.3793448,NA	1	4_9280509	0.229	0.107	0.00858	A:G
AT4G16660	HSP70-17	+	AT4G16660.2,AT4G16660.1	8.3971872,0	1	4_9381323	0.0875	0.883	0.0124	A:G
AT4G16720	RPL15A	-	AT4G16720.1	838.5015994	4	4_9400382,4_9401012,4_9400565,4_9401079	0.0674,0.0384,0.00648,0.0029	0.325,0.227,0.36,0.637	8e-07,0.000165,0.0124,0.0185	T:C,T:C,T:C,T:C
AT4G17040	CLPR4	-	AT4G17040.1	104.7496348	1	4_9585864	0.476	0.166	0.00231	T:C
AT4G17170	RABB1C	-	AT4G17170.1	52.0729374	1	4_9644877	0.204	0.587	4.53e-05	T:C
AT4G17370	AT4G17370	+	AT4G17370.1,AT4G17370.2	6.3230368,0.1612422	1	4_9706232	0.0507	1.76	0.07	A:G
AT4G17390	RPL15B	-	AT4G17390.1	870.0666922	5	4_9714414,4_9714517,4_9714444,4_9714433,4_9714513	0.131,0.0324,0.00772,0.00547,0.00489	0.351,0.429,0.773,0.722,0.815	4.46e-06,0.000683,0.00339,0.0144,0.0218	T:C,T:C,T:C,T:C,T:C
AT4G17520	AT4G17520	+	AT4G17520.1	118.1375136	3	4_9773178,4_9773234,4_9773179	0.0372,0.0775,0.0419	1.21,0.611,0.384	2.54e-08,3.21e-06,0.0212	A:G,A:G,A:G
AT4G17560	AT4G17560	+	AT4G17560.1	207.5679048	1	4_9781181	0.00468	0.366	0.0942	A:G
AT4G17830	AT4G17830	+	AT4G17830.1,AT4G17830.2	9.8498634,0	1	4_9917958	0.223	0.481	0.00375	A:G
AT4G18060	AT4G18060	-	AT4G18060.1	11.3431854	1	4_10027730	0.0593	1.16	0.0813	T:C
AT4G18100	RPL32A	-	AT4G18100.1	1366.6537808	4	4_10035741,4_10035807,4_10035806,4_10035581	0.0293,0.114,0.045,0.0172	0.213,0.245,0.166,1.12	0.000101,0.000106,0.0159,0.0443	T:C,T:C,T:C,T:C
AT4G18480	CHLI1	-	AT4G18480.1	273.9345046	2	4_10202009,4_10201902	0.00371,0.002	1.18,1.79	0.000674,0.044	T:C,T:C
AT4G18730	RPL11B	+	AT4G18730.1	546.5911368	6	4_10302356,4_10303207,4_10302383,4_10303181,4_10303090,4_10303163	0.0502,0.127,0.00597,0.0112,0.0111,0.00215	0.659,0.317,0.598,0.131,0.282,1.33	9.21e-21,4.42e-07,0.000984,0.00823,0.0483,0.0593	A:G,A:G,A:G,A:G,A:G,A:G
AT4G19210	ABCE2	+	AT4G19210.1	25.8567426	3	4_10504955,4_10505001,4_10505104	0.0803,0.0991,0.12	1.25,0.79,1.2	1.83e-10,5.57e-06,0.00249	A:G,A:G,A:G
AT4G19410	PAE7	-	AT4G19410.2	1.7645058	1	4_10581087	0.296	0.661	0.00356	T:C
AT4G20150	AT4G20150	-	AT4G20150.1	1271.5830884	2	4_10888322,4_10888541	0.0319,0.00292	1.39,0.81	4.5e-05,0.0102	T:C,T:C
AT4G20260	PCAP1	+	AT4G20260.1,AT4G20260.4,AT4G20260.6,AT4G20260.5	73.8729902,0.4531904,0.041521,0	1	4_10943170	0.0115	0.963	0.0084	A:G
AT4G20360	TUFA	+	AT4G20360.1,AT4G20360.2	579.568029,NA	1	4_10991087	0.0118	0.298	0.00455	A:G
AT4G20440	SMB	-	AT4G20440.1,AT4G20440.3,AT4G20440.4	50.2325672,NA	1	4_11022821	0.0814	0.327	0.0218	T:C
AT4G20760	AT4G20760	+	AT4G20760.2,AT4G20760.1	16.894968,3.3948024	1	4_11130331	0.0902	0.52	0.00141	A:G
AT4G21105	AT4G21105	+	AT4G21105.1,AT4G21105.3	1224.8957418,NA	9	4_11266799,4_11266715,4_11266724,4_11266414,4_11266690,4_11266723,4_11266399,4_11266783,4_11266772	0.168,0.0666,0.0814,0.058,0.0977,0.0396,0.017,0.00459,0.0115	0.671,0.744,0.472,0.36,0.192,0.504,0.456,1.27,0.725	2.54e-24,2.64e-24,9.52e-11,1e-09,3.31e-06,6.86e-06,0.000458,0.0101,0.0184	A:G,A:G,A:G,A:G,A:G,A:G,A:G,A:G,A:G
AT4G21280	PSBQ1	+	AT4G21280.1,AT4G21280.2	2429.3989504,6.8188758	3	4_11335159,4_11335617,4_11335190	0.00423,0.0075,0.000951	0.576,0.637,1.04	0.000717,0.0167,0.0456	A:G,A:G,A:G
AT4G21860	MSRB2	-	AT4G21860.1,AT4G21860.2	149.9900314,0.6418074	4	4_11600276,4_11600542,4_11600217,4_11600375	0.0812,0.00486,0.022,0.00694	0.747,1.35,1.46,0.856	9.28e-09,0.0108,0.0337,0.0978	T:C,T:C,T:C,T:C
AT4G22220	ISU1	-	AT4G22220.1	140.095739	2	4_11759398,4_11759390	0.205,0.0118	0.206,1.45	4.54e-06,0.00254	T:C,T:C
AT4G22310	MPC4	+	AT4G22310.1	362.2512952	4	4_11791933,4_11792671,4_11792697,4_11792664	0.0426,0.148,0.00634,0.0105	0.522,0.307,1.19,1.37	2.07e-10,0.000121,0.0646,0.0986	A:G,A:G,A:G,A:G
AT4G22505	AT4G22505	-	AT4G22505.1	34.774473	1	4_11851605	0.0763	0.483	0.0871	T:C
AT4G22670	AtHip1	+	AT4G22670.1	45.4331958	2	4_11920683,4_11920580	0.0661,0.00614	0.538,1.5	1.83e-05,0.0292	A:G,A:G
AT4G22890	PGRL1A	+	AT4G22890.1,AT4G22890.5,AT4G22890.4,AT4G22890.2	157.7728988,7.9327522,1.0722816,0.636426	1	4_12007829	0.00696	1.05	0.0523	A:G
AT4G22930	PYR4	+	AT4G22930.1,AT4G22930.2	13.7935214,NA	1	4_12021148	0.0396	1.17	0.0745	A:G
AT4G23470	AT4G23470	+	AT4G23470.1,AT4G23470.3,AT4G23470.4,AT4G23470.2	28.2621066,0.0137518,0	1	4_12249847	0.0523	0.817	0.0368	A:G
AT4G23630	RTNLB1	+	AT4G23630.1,AT4G23630.2	131.9691722,NA	1	4_12319136	0.0041	0.751	0.0222	A:G
AT4G24190	SHD	-	AT4G24190.1,AT4G24190.2	59.6608016,0	3	4_12551926,4_12551889,4_12551915	0.108,0.0134,0.0366	0.451,1.79,0.456	0.000255,0.012,0.0291	T:C,T:C,T:C
AT4G24280	HSP70-6	+	AT4G24280.1	71.7641184	2	4_12590193,4_12593381	0.104,0.0263	0.191,0.657	0.00564,0.024	A:G,A:G
AT4G24330	AT4G24330	-	AT4G24330.1	24.8756786	1	4_12604054	0.515	0.335	1.66e-07	T:C
AT4G24550	AP4M	+	AT4G24550.2,AT4G24550.1,AT4G24550.3	15.9987142,0.0097552,0.0088636	1	4_12677986	0.0825	0.705	0.00364	A:G
AT4G24620	PGI1	-	AT4G24620.1,AT4G24620.2	21.3585064,0.0247292	1	4_12710872	0.0091	2.01	0.00765	T:C
AT4G24690	AT4G24690	+	AT4G24690.1	22.705131	1	4_12743911	0.209	0.207	0.0151	A:G
AT4G24750	STR11	-	AT4G24750.1	73.1879896	2	4_12758458,4_12758423	0.109,0.0207	0.556,1.54	1.11e-09,0.00309	T:C,T:C
AT4G24770	CP31A	-	AT4G24770.1,AT4G24770.2	538.7476696,NA	2	4_12767829,4_12766996	0.00488,0.000768	0.41,3.14	0.0113,0.025	T:C,T:C
AT4G24920	SEC61G2	-	AT4G24920.1,AT4G24920.2	148.9453302,16.1004498	1	4_12819720	0.0326	0.58	0.00152	T:C
AT4G24930	AT4G24930	-	AT4G24930.1	66.5206416	1	4_12821865	0.0261	0.885	0.0214	T:C
AT4G25050	ACP4	+	AT4G25050.1,AT4G25050.2	1163.3848944,1.461469	3	4_12870997,4_12870998,4_12870450	0.0138,0.00346,0.000625	0.48,0.744,2.84	0.00198,0.00681,0.0511	A:G,A:G,A:G
AT4G25080	CHLM	+	AT4G25080.1,AT4G25080.6,AT4G25080.4	293.9798022,2.1939212,0	1	4_12877396	0.00437	0.801	0.0789	A:G
AT4G25100	FSD1	-	AT4G25100.1,AT4G25100.4	817.1026264,0	6	4_12884623,4_12884597,4_12885546,4_12884731,4_12885556,4_12884727	0.225,0.0189,0.00876,0.00949,0.00101,0.00276	0.526,0.78,0.849,0.818,4.43,1.03	1.65e-21,1.16e-08,5.13e-07,0.00123,0.00303,0.0168	T:C,T:C,T:C,T:C,T:C,T:C
AT4G25130	MSR4	-	AT4G25130.1	127.972834	1	4_12899563	0.0355	0.865	5.69e-18	T:C
AT4G25370	AT4G25370	+	AT4G25370.1	154.9658774	9	4_12974719,4_12974356,4_12974633,4_12974682,4_12974393,4_12973299,4_12974662,4_12973246,4_12974413	0.136,0.3,0.0272,0.0178,0.0224,0.0118,0.0162,0.00493,0.0117	0.896,0.335,1.3,1.62,0.459,0.642,1.43,1.65,0.437	2.08e-10,4.19e-07,8.88e-06,5.66e-05,0.000172,0.0201,0.0628,0.0828,0.0954	A:G,A:G,A:G,A:G,A:G,A:G,A:G,A:G,A:G
AT4G25720	QCT	-	AT4G25720.1,AT4G25720.2,AT4G25720.5,AT4G25720.3,AT4G25720.4	6.0810022,0.4005562,0.105508,0.0710184,0.0184552	1	4_13102256	0.0511	1.63	0.0922	T:C
AT4G26110	NAP1;1	+	AT4G26110.1,AT4G26110.2	31.0040522,0.2819902	1	4_13235554	0.0202	1.06	0.0301	A:G
AT4G26300	emb1027	-	AT4G26300.5,AT4G26300.1,AT4G26300.3,AT4G26300.2,AT4G26300.4	10.7488814,1.217142,0.2791096,0.073194,0	1	4_13308466	0.0139	3.94	0.0403	T:C
AT4G26910	AT4G26910	-	AT4G26910.2,AT4G26910.1,AT4G26910.3	9.7145224,2.5970234,0	1	4_13520303	0.0219	0.989	0.0958	T:C
AT4G27000	RBP45C	-	AT4G27000.1	43.5663442	6	4_13554788,4_13554794,4_13554762,4_13555412,4_13554789,4_13554905	0.516,0.53,0.26,0.108,0.167,0.0698	0.433,0.328,0.726,0.256,0.501,0.197	4.81e-06,3.36e-05,0.000493,0.0013,0.00999,0.0823	T:C,T:C,T:C,T:C,T:C,T:C
AT4G27090	RPL14B	-	AT4G27090.1	2151.7007508	5	4_13594483,4_13594140,4_13594277,4_13594505,4_13594904	0.0812,0.0261,0.025,0.00262,0.00173	0.0636,0.266,0.163,0.3,0.726	6.47e-07,0.000638,0.0516,0.0798,0.097	T:C,T:C,T:C,T:C,T:C
AT4G27650	PEL1	-	AT4G27650.1,AT4G27650.2,AT4G27650.3	5.244501,NA	2	4_13805028,4_13803672	0.0565,0.129	2.93,0.863	0.0634,0.0815	T:C,T:C
AT4G28060	COX6B-3	-	AT4G28060.1	419.309983	3	4_13944185,4_13944332,4_13944223	0.34,0.212,0.0675	0.162,0.113,0.0895	1.11e-06,0.000145,0.0031	T:C,T:C,T:C
AT4G28660	PSB28	+	AT4G28660.1,AT4G28660.2	295.5988578,0.3633094	1	4_14150982	0.0513	0.321	0.0176	A:G
AT4G28706	AT4G28706	+	AT4G28706.2,AT4G28706.3,AT4G28706.1,AT4G28706.4	6.3301172,3.9222406,1.8240616,0.1195334	1	4_14169781	0.0272	1.25	0.0969	A:G
AT4G28750	PSAE1	-	AT4G28750.1	1666.6832058	1	4_14203782	0.00321	0.455	0.000574	T:C
AT4G29010	AIM1	-	AT4G29010.1	16.8787684	1	4_14297795	0.0466	0.421	0.0888	T:C
AT4G29060	emb2726	+	AT4G29060.1,AT4G29060.2	42.1944712,0.0155164	1	4_14321206	0.191	0.358	1.71e-06	A:G
AT4G29160	VPS32.2	+	AT4G29160.1,AT4G29160.2	40.309374,0	1	4_14382321	0.0274	0.798	0.0552	A:G
AT4G29390	RPS30C	-	AT4G29390.1	1957.437022	2	4_14465213,4_14465908	0.0198,0.00249	0.226,1.95	0.0392,0.0662	T:C,T:C
AT4G29410	RPL28C	-	AT4G29410.1,AT4G29410.2	530.2232018,NA	1	4_14468388	0.0242	0.826	0.00019	T:C
AT4G29430	RPS15AE	+	AT4G29430.1	84.0173754	1	4_14473292	0.159	0.354	0.000165	A:G
AT4G29480	AT4G29480	-	AT4G29480.1	321.6020614	1	4_14486275	0.00624	0.617	0.0355	T:C
AT4G29735	AT4G29735	-	AT4G29735.1,AT4G29735.2	232.8048578,0.2128216	3	4_14562921,4_14562922,4_14562907	0.101,0.207,0.257	0.933,0.595,0.476	0.000355,0.0082,0.00976	T:C,T:C,T:C
AT4G29830	VIP3	+	AT4G29830.1	21.2512746	1	4_14598602	0.0752	1.46	4.14e-06	A:G
AT4G30010	AT4G30010	+	AT4G30010.1	1102.27496	2	4_14674036,4_14672959	0.142,0.00621	0.648,0.925	7.27e-08,0.044	A:G,A:G
AT4G30190	AHA2	-	AT4G30190.1,AT4G30190.2	27.0517306,0.0604492	1	4_14771021	0.0128	0.909	0.0813	T:C
AT4G30600	AT4G30600	-	AT4G30600.1,AT4G30600.2	16.2006878,NA	4	4_14938637,4_14938154,4_14938601,4_14938076	0.104,0.0131,0.0158,0.0382	0.652,0.757,1.74,1.49	0.000289,0.0814,0.082,0.0992	T:C,T:C,T:C,T:C
AT4G30620	AT4G30620	-	AT4G30620.1	50.9635262	1	4_14949059	0.0238	1.05	0.035	T:C
AT4G30910	AT4G30910	-	AT4G30910.1,AT4G30910.2	4.5374166,0.3021206	1	4_15043291	0.224	0.651	0.000756	T:C
AT4G30920	AT4G30920	-	AT4G30920.1	21.0909058	2	4_15047257,4_15046622	0.177,0.0416	0.589,0.661	4.57e-07,0.00297	T:C,T:C
AT4G30950	FAD6	-	AT4G30950.1	166.3579836	3	4_15057630,4_15057427,4_15058024	0.0311,0.00303,0.0224	0.39,1.71,0.173	0.021,0.0337,0.0576	T:C,T:C,T:C
AT4G31180	AT4G31180	+	AT4G31180.1,AT4G31180.2	29.8260662,NA	1	4_15159321	0.103	0.19	0.0188	A:G
AT4G31300	PBA1	+	AT4G31300.1,AT4G31300.2	92.90016,0.5198174	2	4_15190657,4_15190993	0.118,0.0267	0.29,1.08	7.17e-07,0.00338	A:G,A:G
AT4G31340	AT4G31340	+	AT4G31340.1,AT4G31340.2	18.9465306,0.007592	3	4_15208977,4_15209330,4_15207369	0.357,0.0549,0.0533	0.279,0.552,0.824	2.29e-05,0.0409,0.0453	A:G,A:G,A:G
AT4G31580	RSZ22	+	AT4G31580.1,AT4G31580.2	109.4361642,NA	1	4_15308257	0.159	0.748	0.0499	A:G
AT4G31700	RPS6A	-	AT4G31700.1,AT4G31700.2	607.0309554,0	2	4_15346476,4_15346531	0.0013,0.00196	2.74,1.28	0.0327,0.0955	T:C,T:C
AT4G31985	RPL39C	+	AT4G31985.1	2376.2660702	2	4_15470373,4_15470365	0.084,0.082	0.263,0.222	2.19e-08,3.52e-07	A:G,A:G
AT4G31990	ASP5	-	AT4G31990.1,AT4G31990.4,AT4G31990.3	58.6259286,0.0430468,3.3295944	2	4_15471090,4_15470974	0.197,0.0342	0.289,0.758	9.22e-09,0.0102	T:C,T:C
AT4G32130	AT4G32130	-	AT4G32130.1	27.7252068	3	4_15520310,4_15520297,4_15520254	0.0837,0.0299,0.0897	0.996,1.78,0.654	0.00383,0.00592,0.0929	T:C,T:C,T:C
AT4G32260	AT4G32260	-	AT4G32260.1	490.9700076	1	4_15574221	0.00191	0.746	0.0915	T:C
AT4G32270	AT4G32270	-	AT4G32270.1	6.6457322	1	4_15576244	0.0665	2.4	0.00424	T:C
AT4G32470	QCR7-1	-	AT4G32470.1,AT4G32470.2	451.1392052,0.279502	2	4_15671035,4_15669517	0.00513,0.0481	0.338,0.503	0.0108,0.0392	T:C,T:C
AT4G32530	VHA-c''1	-	AT4G32530.1,AT4G32530.2	34.8747448,0.2971622	1	4_15693763	0.0635	0.597	0.00182	T:C
AT4G32570	TIFY8	-	AT4G32570.1,AT4G32570.2	22.5706342,2.8544228	1	4_15717131	0.0209	1.17	0.06	T:C
AT4G32720	LA1	+	AT4G32720.1,AT4G32720.2	25.1139768,0.8127046	1	4_15789218	0.0614	0.137	0.0991	A:G
AT4G33250	TIF3K1	-	AT4G33250.1	123.451319	3	4_16039120,4_16039122,4_16039125	0.197,0.116,0.0229	0.584,0.713,0.718	1.38e-10,1.06e-06,0.0714	T:C,T:C,T:C
AT4G33380	AT4G33380	+	AT4G33380.1,AT4G33380.2	29.2777734,0.6227902	1	4_16073944	0.0233	1.63	0.00952	A:G
AT4G33520	PAA1	+	AT4G33520.1,AT4G33520.2,AT4G33520.4,AT4G33520.3	67.0850978,1.7260866,0.192233,0.0079776	1	4_16119770	0.0946	0.685	4.57e-06	A:G
AT4G33680	DAP	-	AT4G33680.1	58.9390342	3	4_16172325,4_16172324,4_16171846	0.106,0.0669,0.169	0.583,0.701,0.499	2e-10,7.48e-09,1.1e-07	T:C,T:C,T:C
AT4G33945	AT4G33945	+	AT4G33945.1	8.9356398	1	4_16270198	0.166	0.399	0.0248	A:G
AT4G34110	PAB2	+	AT4G34110.1	129.247659	24	4_16339569,4_16339804,4_16339189,4_16339708,4_16338898,4_16336921,4_16339582,4_16337870,4_16338016,4_16339580,4_16339693,4_16337663,4_16339274,4_16338513,4_16337237,4_16337869,4_16338119,4_16337578,4_16339882,4_16338526,4_16338156,4_16337760,4_16336815,4_16338809	0.398,0.438,0.046,0.0828,0.0435,0.0406,0.0202,0.0278,0.0261,0.0132,0.0041,0.0198,0.0104,0.00681,0.013,0.0152,0.00352,0.017,0.00555,0.00679,0.00684,0.0286,0.00381,0.00545	0.374,0.43,0.673,0.61,0.528,0.582,0.867,0.55,0.831,0.912,2.41,0.662,0.768,0.655,0.51,0.514,0.881,0.418,3.78,0.334,0.462,0.541,1.09,1.48	4.91e-17,9.97e-16,4.35e-10,2.73e-09,9.84e-08,3.8e-07,7.29e-07,5.89e-05,9.62e-05,0.000235,0.0012,0.00145,0.0052,0.00735,0.00766,0.00986,0.0105,0.0157,0.0254,0.0256,0.0277,0.0393,0.0855,0.0877	A:G,A:G,A:G,A:G,A:G,A:G,A:G,A:G,A:G,A:G,A:G,A:G,A:G,A:G,A:G,A:G,A:G,A:G,A:G,A:G,A:G,A:G,A:G,A:G
AT4G34120	CBSX2	+	AT4G34120.1	51.7085382	1	4_16341952	0.106	0.612	7.87e-07	A:G
AT4G34190	SEP1	-	AT4G34190.1	653.1824606	1	4_16372672	0.00962	0.648	0.00661	T:C
AT4G34240	ALDH3I1	+	AT4G34240.1,AT4G34240.2,AT4G34240.4,AT4G34240.3	17.3748272,0.7390822,0.0342592,0	1	4_16391471	0.0583	1.05	0.0018	A:G
AT4G34265	AT4G34265	+	AT4G34265.2,AT4G34265.1,AT4G34265.3	179.6656896,93.4111608,16.9469194	1	4_16403457	0.0988	0.342	0.0105	A:G
AT4G34270	AT4G34270	-	AT4G34270.1	17.132987	1	4_16405052	0.112	0.721	0.0788	T:C
AT4G34350	ISPH	-	AT4G34350.1	104.3925388	1	4_16430134	0.00648	0.879	0.00899	T:C
AT4G34450	AT4G34450	+	AT4G34450.1	29.6111576	3	4_16476846,4_16476814,4_16476675	0.103,0.0824,0.0262	0.931,0.955,1.02	1.79e-09,2.56e-07,5.86e-06	A:G,A:G,A:G
AT4G34490	CAP1	-	AT4G34490.1,AT4G34490.2	10.7723408,7.7038044	1	4_16484855	0.0289	0.522	0.0942	T:C
AT4G34620	SSR16	-	AT4G34620.1	3835.654832	20	4_16535174,4_16535845,4_16535159,4_16534947,4_16535133,4_16535967,4_16535036,4_16535237,4_16534948,4_16535142,4_16536055,4_16535203,4_16535095,4_16535059,4_16535085,4_16534992,4_16535060,4_16535855,4_16535177,4_16535858	0.0202,0.0424,0.0818,0.0504,0.00218,0.00931,0.021,0.00301,0.00379,0.00192,0.00156,0.0013,0.00443,0.00291,0.0112,0.00411,0.00188,0.00143,0.00391,0.000311	0.576,0.347,0.378,0.59,1.02,0.264,0.509,0.572,3.05,0.683,1.5,0.785,0.606,0.767,0.41,1.39,1.27,0.199,0.298,1.34	1.68e-13,3.42e-10,4.49e-09,0.000137,0.000445,0.00062,0.000681,0.0011,0.00215,0.0022,0.00436,0.00497,0.00715,0.00845,0.012,0.0211,0.0494,0.0521,0.071,0.0743	T:C,T:C,T:C,T:C,T:C,T:C,T:C,T:C,T:C,T:C,T:C,T:C,T:C,T:C,T:C,T:C,T:C,T:C,T:C,T:C
AT4G34640	SQS1	+	AT4G34640.1,AT4G34640.2	21.7829906,0.0706756	2	4_16541697,4_16541728	0.129,0.0926	1.06,0.675	7.16e-07,0.0464	A:G,A:G
AT4G34700	CIB22	+	AT4G34700.1	948.733069	10	4_16558578,4_16558627,4_16558580,4_16558619,4_16558590,4_16558574,4_16558584,4_16558591,4_16558626,4_16558612	0.14,0.264,0.0214,0.0196,0.00369,0.00481,0.116,0.101,0.0574,0.0601	0.476,0.159,0.849,0.67,2.25,1.33,0.0782,0.107,0.45,0.155	2.53e-10,3.82e-06,7.36e-06,0.000186,0.00198,0.00882,0.0179,0.0196,0.0478,0.0573	A:G,A:G,A:G,A:G,A:G,A:G,A:G,A:G,A:G,A:G
AT4G34710	SPE2	-	AT4G34710.1,AT4G34710.2	88.7820902,NA	1	4_16560677	0.00354	1.25	0.0162	T:C
AT4G34720	VHA-C3	-	AT4G34720.1,AT4G34720.2	250.8911998,0.5752722	2	4_16568197,4_16568198	0.0274,0.0353	0.231,0.26	0.0278,0.0413	T:C,T:C
AT4G35020	ARAC3	+	AT4G35020.1,AT4G35020.4	15.5049602,1.2230552	1	4_16673165	0.028	1.26	0.00888	A:G
AT4G35100	PIP2-7	+	AT4G35100.1,AT4G35100.2	559.5893012,NA	1	4_16709720	0.00802	0.464	0.0554	A:G
AT4G35250	AT4G35250	-	AT4G35250.1	64.2979058	1	4_16772889	0.0119	0.831	0.0705	T:C
AT4G36195	AT4G36195	+	AT4G36195.1,AT4G36195.2	17.06724,0.1256096	1	4_17129822	0.144	0.928	0.0238	A:G
AT4G36760	ATAPP1	+	AT4G36760.1,AT4G36760.3,AT4G36760.2	5.0907564,0.0062184,0	1	4_17329859	0.157	1.26	0.000107	A:G
AT4G36800	RCE1	-	AT4G36800.1,AT4G36800.2	80.0798166,NA	2	4_17341314,4_17341193	0.0354,0.0136	1.27,1.75	0.00138,0.0307	T:C,T:C
AT4G37200	HCF164	-	AT4G37200.1	31.0626156	1	4_17510984	0.0696	0.491	0.0316	T:C
AT4G37270	HMA1	-	AT4G37270.1	6.7040808	2	4_17541988,4_17542048	0.0538,0.161	1.5,0.391	0.0118,0.0639	T:C,T:C
AT4G37830	COX6A	-	AT4G37830.1,AT4G37830.2,AT4G37830.3	881.2461988,1.4627164,0.1735002	1	4_17788260	0.00173	1.64	0.0692	T:C
AT4G37910	HSP70-9	-	AT4G37910.1,AT4G37910.2	34.7331316,NA	1	4_17826373	0.0125	1.91	0.0416	T:C
AT4G37930	SHM1	-	AT4G37930.1	274.9465922	2	4_17833541,4_17832186	0.00668,0.00474	0.84,0.853	0.00638,0.022	T:C,T:C
AT4G38370	AT4G38370	-	AT4G38370.1	24.5615258	1	4_17970183	0.056	1.55	0.00151	T:C
AT4G38510	VHA-B2	-	AT4G38510.5,AT4G38510.1	30.804518,0	2	4_18011318,4_18012304	0.0549,0.0368	0.224,1.1	0.0463,0.0652	T:C,T:C
AT4G38770	PRP4	-	AT4G38770.1	259.7457516	1	4_18097303	0.00282	-1.04	0.0495	T:C
AT4G38800	MTN1	-	AT4G38800.1	58.1522148	1	4_18113389	0.027	1.01	0.0595	T:C
AT4G38920	VHA-C3	+	AT4G38920.1,AT4G38920.2	264.7413378,0	6	4_18149001,4_18149004,4_18148741,4_18148858,4_18148330,4_18149000	0.0476,0.0679,0.0312,0.018,0.0118,0.0201	0.92,0.561,0.495,1,0.457,0.951	5.96e-06,0.000176,0.000193,0.00066,0.031,0.0431	A:G,A:G,A:G,A:G,A:G,A:G
AT4G39080	VHA-A3	+	AT4G39080.1	20.8033638	1	4_18213737	0.13	0.577	0.0111	A:G
AT4G39200	RPS25E	+	AT4G39200.1,AT4G39200.2	2117.9232046,16.0734068	6	4_18258389,4_18257578,4_18258390,4_18258398,4_18258457,4_18257834	0.0593,0.0183,0.0178,0.0083,0.0242,0.00837	0.204,0.296,0.277,0.491,0.2,0.302	1.09e-06,0.00151,0.00241,0.0107,0.0131,0.0193	A:G,A:G,A:G,A:G,A:G,A:G
AT4G39460	SAMC1	-	AT4G39460.1,AT4G39460.2,AT4G39460.3	39.1086712,NA	2	4_18356358,4_18356099	0.034,0.0666	0.526,0.416	0.00943,0.0716	T:C,T:C
AT4G39680	AT4G39680	-	AT4G39680.1,AT4G39680.2	14.7551076,NA	2	4_18414907,4_18415237	0.403,0.163	0.299,0.269	6.2e-06,0.0601	T:C,T:C
AT5G01350	AT5G01350	-	AT5G01350.1	507.7233214	1	5_145849	0.0063	0.762	0.0891	T:C
AT5G01530	LHCB4.1	+	AT5G01530.1	2513.1472332	9	5_209972,5_209503,5_209228,5_209497,5_209573,5_210163,5_209906,5_210266,5_209564	0.018,0.0209,0.0194,0.00331,0.00214,0.00186,0.00164,0.00853,0.0108	0.36,0.31,0.349,0.192,0.251,0.404,0.129,0.645,0.239	5.49e-08,3.3e-07,1.2e-06,0.00921,0.00929,0.0122,0.0205,0.0309,0.0327	A:G,A:G,A:G,A:G,A:G,A:G,A:G,A:G,A:G
AT5G01590	TIC56	+	AT5G01590.1	53.5967672	1	5_226651	0.0826	0.616	3.63e-06	A:G
AT5G02240	AT5G02240	+	AT5G02240.1	172.45341	2	5_452272,5_451549	0.0125,0.0269	0.454,0.92	0.0131,0.0343	A:G,A:G
AT5G02450	RPL36C	+	AT5G02450.1	1813.1433228	3	5_534387,5_534384,5_534390	0.0315,0.00926,0.0242	0.354,0.481,0.122	9.11e-05,0.0145,0.0751	A:G,A:G,A:G
AT5G02500	MED37E	-	AT5G02500.1,AT5G02500.2	385.506318,0.0380746	7	5_555436,5_554298,5_554194,5_554311,5_556160,5_554833,5_554091	0.0204,0.0174,0.00562,0.00627,0.00145,0.00444,0.0028	0.926,0.427,0.928,0.697,1.3,0.373,0.886	7.66e-05,0.000128,0.000255,0.00163,0.0291,0.0566,0.0947	T:C,T:C,T:C,T:C,T:C,T:C,T:C
AT5G02565		+	AT5G02565.1	NA	3	5_5448971,5_5449116,5_5449059	0.0867,0.458,0.145	1.33,0.447,0.593	1.89e-06,2.22e-05,0.00137	A:G,A:G,A:G
AT5G02575		+	AT5G02575.1	NA	4	5_5449415,5_5449318,5_5449456,5_5449324	0.213,0.0619,0.108,0.0163	0.607,1.76,0.412,1.5	7.81e-06,7.45e-05,0.022,0.071	A:G,A:G,A:G,A:G
AT5G02610	RPL35D	+	AT5G02610.1,AT5G02610.2	609.4081308,0.9177046	1	5_588541	0.00848	1.3	0.0433	A:G
AT5G02790	GSTL3	+	AT5G02790.1	89.4701468	1	5_634196	0.0166	0.185	0.0321	A:G
AT5G02870	RPL4D	+	AT5G02870.1,AT5G02870.2	269.6314022,0.2309928	4	5_658856,5_659482,5_659518,5_658310	0.00272,0.0109,0.0041,0.0241	1.17,0.541,1.27,0.287	0.00996,0.0824,0.0833,0.0938	A:G,A:G,A:G,A:G
AT5G02960	RPS23B	-	AT5G02960.1	1564.2787346	4	5_693264,5_693276,5_693280,5_693341	0.0107,0.0382,0.0137,0.00412	0.541,0.299,0.425,0.579	0.00216,0.0457,0.0496,0.0543	T:C,T:C,T:C,T:C
AT5G03290	IDH5	+	AT5G03290.1	29.828413	1	5_795892	0.0405	0.308	0.0365	A:G
AT5G03345	AT5G03345	+	AT5G03345.1,AT5G03345.2	148.9985716,0.696292	2	5_815517,5_815431	0.101,0.0233	1.71,0.793	3.18e-05,0.05	A:G,A:G
AT5G03370	AT5G03370	-	AT5G03370.1	21.0046886	1	5_825705	0.321	0.757	0.0823	T:C
AT5G03455	CDC25	+	AT5G03455.1,AT5G03455.2	44.5799462,0.0299674	1	5_864053	0.14	1.6	0.0705	A:G
AT5G03660	AT5G03660	+	AT5G03660.1,AT5G03660.3,AT5G03660.2	15.3463282,0.0263162,0	1	5_939800	0.123	0.658	0.0627	A:G
AT5G03850	RPS28A	-	AT5G03850.1	2938.79107	1	5_1028504	0.247	0.144	5.68e-06	T:C
AT5G03880	AT5G03880	-	AT5G03880.1	37.1542996	1	5_1041305	0.0169	1.3	0.00984	T:C
AT5G03940	FFC	-	AT5G03940.1	29.7958862	1	5_1061213	0.0182	1.24	0.0254	T:C
AT5G04130	GYRBM	-	AT5G04130.1,AT5G04130.2	8.3198658,0.0946226	1	5_1122053	0.102	0.716	0.0862	T:C
AT5G04280	RZ1C	+	AT5G04280.1,AT5G04280.2	36.6638834,0	1	5_1195026	0.0258	0.973	0.0118	A:G
AT5G04590	SIR	+	AT5G04590.1	76.3943818	2	5_1322036,5_1319518	0.176,0.011	0.471,0.488	8.93e-11,0.061	A:G,A:G
AT5G04710	AT5G04710	-	AT5G04710.1	9.8625418	1	5_1359255	0.0429	1.08	0.00696	T:C
AT5G04800	RPS17D	+	AT5G04800.1,AT5G04800.2,AT5G04800.3,AT5G04800.4	785.0715886,NA	4	5_1389547,5_1389347,5_1389666,5_1389638	0.0828,0.0112,0.0369,0.0198	0.413,0.393,0.545,0.473	1.23e-07,0.000219,0.00765,0.049	A:G,A:G,A:G,A:G
AT5G04885	AT5G04885	+	AT5G04885.2,AT5G04885.1	9.0543324,0	1	5_1426628	0.174	0.581	0.0195	A:G
AT5G05010	AT5G05010	+	AT5G05010.1,AT5G05010.2	40.9512618,NA	2	5_1478949,5_1479913	0.0311,0.0204	0.805,1.32	0.00254,0.0546	A:G,A:G
AT5G05060	AT5G05060	-	AT5G05060.1	49.6897258	4	5_1494871,5_1494490,5_1494503,5_1494853	0.0667,0.0115,0.0311,0.0121	0.601,1.44,0.524,0.912	0.00791,0.0172,0.0745,0.0882	T:C,T:C,T:C,T:C
AT5G05740	EGY2	-	AT5G05740.2,AT5G05740.3,AT5G05740.1	21.6246288,2.743771,0.4804458	3	5_1724177,5_1724534,5_1725401	0.0363,0.0216,0.00765	0.782,0.493,0.837	0.00188,0.0576,0.0684	T:C,T:C,T:C
AT5G06290	2-Cys Prx B	+	AT5G06290.1,AT5G06290.2	119.5730542,0.4136306	1	5_1920954	0.00528	0.956	0.00372	A:G
AT5G06340	NUDT27	+	AT5G06340.1	82.3286148	2	5_1936651,5_1936680	0.117,0.0172	0.545,0.8	2.2e-14,0.0505	A:G,A:G
AT5G07020	AT5G07020	-	AT5G07020.1	133.2230098	2	5_2180944,5_2180708	0.0233,0.00549	0.976,2.44	3.32e-08,0.0778	T:C,T:C
AT5G07340	AT5G07340	+	AT5G07340.1,AT5G07340.2	13.4363248,0.03385	1	5_2319407	0.044	0.487	0.0185	A:G
AT5G07350	Tudor1	-	AT5G07350.1,AT5G07350.2	15.5947734,0.4969698	1	5_2321099	0.172	0.377	0.00166	T:C
AT5G07960	AT5G07960	+	AT5G07960.1	164.794303	1	5_2543413	0.23	0.443	0.0543	A:G
AT5G08000	PDCB2	+	AT5G08000.1,AT5G08000.2	38.8322836,0.2263818	1	5_2565329	0.0213	1.6	0.0727	A:G
AT5G08060	AT5G08060	+	AT5G08060.1	227.0514104	2	5_2582194,5_2582216	0.0175,0.0113	1.2,1.02	0.000172,0.0697	A:G,A:G
AT5G08415	LIP1P	-	AT5G08415.1	10.4522888	1	5_2711435	0.0352	1.22	0.00532	T:C
AT5G08450	AT5G08450	-	AT5G08450.1,AT5G08450.2,AT5G08450.3	4.9571542,NA	1	5_2728497	0.033	0.657	0.09	T:C
AT5G08610	RH26	+	AT5G08610.1	18.2315736	2	5_2794048,5_2794096	0.346,0.103	0.496,0.746	0.000225,0.0092	A:G,A:G
AT5G08670	AT5G08670	-	AT5G08670.1	74.1290294	2	5_2818412,5_2818396	0.1,0.00639	0.376,1.84	3.04e-07,0.0556	T:C,T:C
AT5G08680	AT5G08680	+	AT5G08680.1	34.8743656	1	5_2822400	0.0149	1.92	0.0224	A:G
AT5G09510	RPS15D	-	AT5G09510.1,AT5G09510.2	447.2087386,0	2	5_2955520,5_2956398	0.0747,0.0123	1.65,0.23	0.00849,0.0127	T:C,T:C
AT5G09650	PPA6	-	AT5G09650.1	171.794295	3	5_2993026,5_2991552,5_2991400	0.0731,0.00802,0.00313	0.47,1.05,1.8	1.53e-08,4.93e-05,0.0446	T:C,T:C,T:C
AT5G09660	PMDH2	-	AT5G09660.1,AT5G09660.4,AT5G09660.5,AT5G09660.3,AT5G09660.2	287.212961,1.0974798,0.7420308,0	2	5_2993615,5_2994177	0.0133,0.0203	0.854,0.341	0.000406,0.000716	T:C,T:C
AT5G09770	AT5G09770	-	AT5G09770.1	92.9597102	1	5_3035169	0.143	0.8	0.00366	T:C
AT5G09810	ACT7	+	AT5G09810.1	187.7622694	1	5_3053939	0.0335	0.184	0.0673	A:G
AT5G09880	AT5G09880	-	AT5G09880.1	7.302508	1	5_3083121	0.121	0.61	0.0681	T:C
AT5G09900	RPN5A	-	AT5G09900.1,AT5G09900.3,AT5G09900.2	25.1761942,12.388466,0	1	5_3089534	0.0115	0.862	0.0645	T:C
AT5G10140	FLC	-	AT5G10140.1,AT5G10140.2,AT5G10140.4,AT5G10140.3	3.849957,0.2940984,0.036474,0	1	5_3179239	0.242	0.873	0.0339	T:C
AT5G10180	SULTR2;1	+	AT5G10180.1	29.6488372	2	5_3196769,5_3196173	0.0879,0.0336	0.435,0.447	0.0526,0.091	A:G,A:G
AT5G10360	RPS6B	-	AT5G10360.1,AT5G10360.2	530.9420324,0.6816654	3	5_3258794,5_3259237,5_3258877	0.0172,0.0349,0.0272	0.395,-0.000617,0.195	0.011,0.0291,0.0401	T:C,T:C,T:C
AT5G10920	T30N20_190	+	AT5G10920.1	24.2044996	1	5_3443876	0.239	0.235	0.000154	A:G
AT5G10960	CAF1-10	+	AT5G10960.1	69.891944	1	5_3465110	0.0127	0.748	0.029	A:G
AT5G11170	RH15	+	AT5G11170.1,AT5G11170.2	65.3734018,0	2	5_3556200,5_3556681	0.0491,0.0582	0.752,0.223	4.63e-07,0.0358	A:G,A:G
AT5G11200	RH15	+	AT5G11200.1,AT5G11200.2,AT5G11200.3	45.7848348,1.3168192,0.2713408	4	5_3570571,5_3570685,5_3570546,5_3570544	0.26,0.294,0.0442,0.351	0.131,0.188,0.825,0.102	3.12e-07,2.72e-05,4.89e-05,0.0126	A:G,A:G,A:G,A:G
AT5G11450	PPD5	+	AT5G11450.2,AT5G11450.1	86.7397396,0	1	5_3655717	0.0083	0.816	0.00727	A:G
AT5G11480	AT5G11480	-	AT5G11480.1	56.5555866	2	5_3670051,5_3670058	0.264,0.0197	0.408,0.845	1.3e-21,0.000263	T:C,T:C
AT5G11770	AT5G11770	-	AT5G11770.1	116.511172	3	5_3792530,5_3791276,5_3791311	0.295,0.028,0.158	0.292,0.469,0.177	8.62e-05,0.00358,0.0343	T:C,T:C,T:C
AT5G12140	CYS1	-	AT5G12140.1	663.8161808	2	5_3923821,5_3923142	0.00853,0.38	0.852,0.164	0.00233,0.00917	T:C,T:C
AT5G12470	AT5G12470	-	AT5G12470.1	49.021799	3	5_4045367,5_4044937,5_4044946	0.00837,0.0111,0.0402	3.07,1.46,0.653	0.00809,0.0109,0.0214	T:C,T:C,T:C
AT5G12860	DIT1	-	AT5G12860.1,AT5G12860.2	76.678574,0.0319296	2	5_4060021,5_4060500	0.0357,0.0477	0.641,0.391	2.76e-06,0.00413	T:C,T:C
AT5G13030	AT5G13030	+	AT5G13030.1	15.6210922	1	5_4136246	0.11	0.411	0.0612	A:G
AT5G13240	AT5G13240	-	AT5G13240.3,AT5G13240.2,AT5G13240.1	14.0414924,0.0637796,0	1	5_4226474	0.0419	1.34	0.021	T:C
AT5G13450	ATP5	-	AT5G13450.1,AT5G13450.2	161.141526,0.0534592	3	5_4310549,5_4311167,5_4310533	0.0164,0.00596,0.00374	0.737,1.53,0.974	0.000147,0.0227,0.0644	T:C,T:C,T:C
AT5G13630	CHLH	-	AT5G13630.1,AT5G13630.2	119.3120634,0.079344	1	5_4387689	0.0269	0.529	0.000297	T:C
AT5G13850	NACA3	+	AT5G13850.1	159.8491742	3	5_4472426,5_4472450,5_4472635	0.298,0.0347,0.0787	0.474,0.847,0.509	1.1e-33,5.38e-11,0.000202	A:G,A:G,A:G
AT5G14040	MPT3	-	AT5G14040.1	135.1264706	2	5_4531513,5_4530975	0.01,0.0169	1.48,1.21	7.54e-05,0.00943	T:C,T:C
AT5G14060	AK2	+	AT5G14060.1,AT5G14060.3	24.6362264,1.2613474	2	5_4538808,5_4538924	0.00988,0.0137	0.9,1.39	0.0178,0.0319	A:G,A:G
AT5G14320	RPS13	-	AT5G14320.1,AT5G14320.2	895.3326548,3.6638476	2	5_4617851,5_4617855	0.025,0.0137	0.418,0.756	3.48e-05,0.000373	T:C,T:C
AT5G14800	PROC1	-	AT5G14800.1,AT5G14800.2	50.550764,1.0487014	1	5_4787540	0.00635	1.37	0.0952	T:C
AT5G14840	AT5G14840	-	AT5G14840.1	NA	1	5_4800022	0.0651	1.45	0.0119	T:C
AT5G14910	AT5G14910	+	AT5G14910.1,AT5G14910.2	229.585913,NA	3	5_4825283,5_4824015,5_4824007	0.0399,0.00885,0.00365	0.64,0.581,0.264	0.00098,0.0361,0.0899	A:G,A:G,A:G
AT5G15090	VDAC3	-	AT5G15090.1,AT5G15090.2	95.3441184,NA	2	5_4889875,5_4889648	0.00741,0.14	2.06,0.201	0.000797,0.0373	T:C,T:C
AT5G15320	AT5G15320	+	AT5G15320.1,AT5G15320.2	653.7564566,1.7131178	3	5_4978835,5_4978633,5_4978834	0.215,0.0328,0.0363	0.797,0.367,0.802	1.85e-07,0.000992,0.0626	A:G,A:G,A:G
AT5G15390	AT5G15390	+	AT5G15390.1,AT5G15390.2	11.7376668,1.6661748	1	5_4997019	0.0763	0.443	0.05	A:G
AT5G15460	MUB2	-	AT5G15460.1,AT5G15460.3	16.8436406,1.0422406	1	5_5018913	0.218	0.579	0.0402	T:C
AT5G15530	BCCP2	+	AT5G15530.1	28.9668868	1	5_5039716	0.0148	1.23	0.0464	A:G
AT5G15610	AT5G15610	+	AT5G15610.2,AT5G15610.1	19.4355594,0.7902512	1	5_5081977	0.0975	0.0753	0.0723	A:G
AT5G15650	RGP2	+	AT5G15650.1	81.3478678	1	5_5093972	0.0177	0.397	0.00638	A:G
AT5G16050	GRF5	-	AT5G16050.1,AT5G16050.2	118.1688296,NA	1	5_5244073	0.00628	3.62	0.000113	T:C
AT5G16060	AT5G16060	+	AT5G16060.1	107.1512636	2	5_5247225,5_5247175	0.0567,0.034	0.498,0.577	0.0383,0.0972	A:G,A:G
AT5G16130	RPS7C	+	AT5G16130.1	393.6373648	1	5_5269339	0.0184	0.49	0.00355	A:G
AT5G16290	VAT1	+	AT5G16290.1,AT5G16290.2	13.2474744,NA	1	5_5337556	0.2	0.869	3.54e-06	A:G
AT5G16390	BCCP1	-	AT5G16390.1,AT5G16390.2	46.9960798,0.028111	1	5_5361033	0.194	0.407	5.32e-06	T:C
AT5G16440	IPP1	+	AT5G16440.1	34.6509842	1	5_5373493	0.0626	0.588	0.000416	A:G
AT5G16620	TIC40	+	AT5G16620.1	23.5938192	2	5_5453949,5_5454321	0.0438,0.0272	0.71,2.04	0.0472,0.0944	A:G,A:G
AT5G16710	DHAR3	+	AT5G16710.1	71.1961566	2	5_5484893,5_5484913	0.111,0.0555	0.555,0.381	4.4e-06,0.022	A:G,A:G
AT5G17270	AT5G17270	+	AT5G17270.1,AT5G17270.2	0.9071304,0.3932842	1	5_5684139	0.25	1.19	0.0386	A:G
AT5G17530	AT5G17530	+	AT5G17530.5,AT5G17530.3,AT5G17530.4,AT5G17530.1	4.4046212,3.258536,0.3816076,0	1	5_5781447	0.0368	1.04	0.0859	A:G
AT5G17710	EMB1241	-	AT5G17710.2,AT5G17710.1	67.9111128,0.8667308	1	5_5839682	0.175	0.329	1.28e-06	T:C
AT5G17770	CBR1	-	AT5G17770.1	100.7921116	3	5_5865391,5_5865428,5_5865440	0.00751,0.0471,0.0647	0.622,0.147,0.118	0.0148,0.04,0.0873	T:C,T:C,T:C
AT5G17840	AT5G17840	-	AT5G17840.1	36.920132	1	5_5895888	0.344	0.409	0.000642	T:C
AT5G17920	MS1	+	AT5G17920.1,AT5G17920.2	238.9237014,NA	3	5_5939085,5_5939047,5_5939344	0.0607,0.0241,0.0479	0.218,0.276,0.122	6.89e-05,0.00291,0.0315	A:G,A:G,A:G
AT5G18380	RPS16C	-	AT5G18380.1	1823.5004244	2	5_6090254,5_6090248	0.00184,0.00772	0.957,0.32	0.0116,0.0444	T:C,T:C
AT5G19370	AT5G19370	-	AT5G19370.1	44.085196	1	5_6524761	0.033	0.834	0.0108	T:C
AT5G19510	AT5G19510	-	AT5G19510.1	552.6349328	2	5_6581988,5_6581996	0.0839,0.00763	0.18,0.213	9.59e-12,0.0109	T:C,T:C
AT5G19620	OEP80	+	AT5G19620.1	7.372503	1	5_6626897	0.052	0.499	0.0375	A:G
AT5G19690	STT3A	+	AT5G19690.1,AT5G19690.2	16.4448444,0	1	5_6656708	0.0344	0.792	0.0186	A:G
AT5G19750	AT5G19750	+	AT5G19750.1	45.1893616	2	5_6678525,5_6679213	0.0499,0.072	0.291,0.305	0.0254,0.0784	A:G,A:G
AT5G19760	DTC	-	AT5G19760.1	243.1247296	1	5_6681799	0.0914	0.277	0.0146	T:C
AT5G19780	TUBA5	+	AT5G19780.1	88.3979628	2	5_6689092,5_6688460	0.0878,0.00985	0.503,1.02	0.00278,0.0207	A:G,A:G
AT5G19990	RPT6A	+	AT5G19990.1,AT5G19990.2	35.9348972,0	1	5_6753085	0.0509	0.237	0.0218	A:G
AT5G20160	AT5G20160	-	AT5G20160.1,AT5G20160.2	274.4197354,0.0324758	2	5_6803985,5_6804272	0.18,0.216	0.374,0.116	0.00289,0.0128	T:C,T:C
AT5G20290	RPS8A	-	AT5G20290.1	1117.8031808	4	5_6851884,5_6851966,5_6852183,5_6851714	0.0481,0.015,0.00113,0.0382	0.171,0.0935,1.44,0.0759	6.83e-05,0.00735,0.0299,0.0319	T:C,T:C,T:C,T:C
AT5G20500	GRXC4	+	AT5G20500.1	144.5147004	1	5_6938741	0.0102	0.552	0.0392	A:G
AT5G20700	AT5G20700	-	AT5G20700.1	228.3678828	1	5_7006769	0.00298	1.47	0.0123	T:C
AT5G20720	CPN21	+	AT5G20720.1,AT5G20720.2,AT5G20720.3,AT5G20720.4	1110.976306,NA	3	5_7016311,5_7015059,5_7016207	0.0662,0.0247,0.00333	0.12,0.189,0.531	1.98e-07,0.000818,0.0325	A:G,A:G,A:G
AT5G20890	CCT2	-	AT5G20890.1	66.0496118	1	5_7087043	0.0793	0.31	4.09e-06	T:C
AT5G20920	EMB1401	-	AT5G20920.1,AT5G20920.2	76.093855,6.1385204	2	5_7095778,5_7095033	0.0295,0.0162	0.463,0.519	0.041,0.0451	T:C,T:C
AT5G21020	AT5G21020	+	AT5G21020.2	455.8772538	1	5_7139480	0.0494	0.656	9.7e-05	A:G
AT5G21430	ndhU	+	AT5G21430.1,AT5G21430.2	42.0598518,0.0131536	2	5_7223127,5_7223342	0.057,0.0319	0.714,0.756	0.019,0.0346	A:G,A:G
AT5G22330	RIN1	-	AT5G22330.1	13.6413176	1	5_7391097	0.0283	4.37	0.01	T:C
AT5G22340	AT5G22340	+	AT5G22340.1,AT5G22340.2	18.3777348,12.5799682	1	5_7396653	0.033	1.05	0.0502	A:G
AT5G22450	AT5G22450	-	AT5G22450.1,AT5G22450.2,AT5G22450.3	2.4443768,NA	1	5_7437983	0.0703	1.84	0.049	T:C
AT5G22620	AT5G22620	-	AT5G22620.1,AT5G22620.3,AT5G22620.6	7.0586116,3.1740104,0.973718	1	5_7520035	0.0247	3.96	0.00265	T:C
AT5G23040	CPP1	-	AT5G23040.1,AT5G23040.2	130.0399294,NA	4	5_7730602,5_7729442,5_7729936,5_7730116	0.00272,0.00571,0.00995,0.00774	1.89,4.14,1.07,1.23	0.000632,0.00231,0.00811,0.0532	T:C,T:C,T:C,T:C
AT5G23060	CAS	-	AT5G23060.1,AT5G23060.2	171.4851992,12.9079042	1	5_7737350	0.00922	0.574	0.04	T:C
AT5G23540	RPN11	+	AT5G23540.1,AT5G23540.2	76.4940854,0	1	5_7939338	0.157	0.255	3.45e-05	A:G
AT5G23670	LCB2A	+	AT5G23670.1,AT5G23670.2	10.363935,NA	1	5_7983770	0.0306	2.93	0.00149	A:G
AT5G23740	RPS11C	-	AT5G23740.1	470.0693154	5	5_8008692,5_8008183,5_8009209,5_8008459,5_8008736	0.0709,0.0185,0.00586,0.0024,0.0106	0.136,1.17,0.674,1.42,0.267	2.47e-06,0.0023,0.0188,0.0287,0.0612	T:C,T:C,T:C,T:C,T:C
AT5G23940	DCR	-	AT5G23940.1	63.2189644	1	5_8076582	0.0363	0.381	0.0488	T:C
AT5G24000	AT5G24000	-	AT5G24000.1	2.4228852	1	5_8110558	0.112	1.86	0.0182	T:C
AT5G24105	AGP41	+	AT5G24105.1	53.560702	1	5_8152689	0.0476	1.28	0.0335	A:G
AT5G24490	AT5G24490	+	AT5G24490.1	113.461225	1	5_8367320	0.0807	0.399	0.0154	A:G
AT5G24650	AT5G24650	+	AT5G24650.1	72.6332858	1	5_8438861	0.167	0.545	9.74e-05	A:G
AT5G24690	AT5G24690	-	AT5G24690.1	53.1653436	5	5_8455633,5_8455780,5_8455634,5_8456348,5_8458448	0.133,0.0791,0.0139,0.0241,0.0434	0.904,0.655,1.61,1.02,0.583	1.78e-07,1.84e-07,0.000817,0.00111,0.0518	T:C,T:C,T:C,T:C,T:C
AT5G25170	AT5G25170	+	AT5G25170.1,AT5G25170.2	16.329559,0.0854284	2	5_8694331,5_8694328	0.0683,0.0518	1.37,1.05	0.000109,0.054	A:G,A:G
AT5G25360	AT5G25360	-	AT5G25360.1,AT5G25360.3	33.4110926,0.02806	1	5_8801510	0.0339	2.11	0.0164	T:C
AT5G25460	AT5G25460	+	AT5G25460.1	125.2810736	1	5_8865589	0.0143	1.67	0.05	A:G
AT5G26000	TGG1	-	AT5G26000.1,AT5G26000.2	384.8042658,53.0963984	4	5_9079883,5_9081552,5_9082296,5_9080297	0.0129,0.00362,0.0059,0.00127	1.03,1.51,1.29,1.36	1.88e-07,6.98e-05,0.0153,0.0237	T:C,T:C,T:C,T:C
AT5G26360	CCT3	-	AT5G26360.1	43.0991526	3	5_9255884,5_9255597,5_9255432	0.0183,0.055,0.0132	0.509,0.405,2.23	0.00542,0.0407,0.0555	T:C,T:C,T:C
AT5G26667	UMK3	+	AT5G26667.2,AT5G26667.3,AT5G26667.4	82.2228806,NA	1	5_9278113	0.183	0.23	5.27e-06	A:G
AT5G26742	RH3	-	AT5G26742.2,AT5G26742.1,AT5G26742.3	60.056943,15.1057426,0.1002376	2	5_9285979,5_9285271	0.0068,0.0162	1.26,0.398	0.0451,0.0636	T:C,T:C
AT5G27380	GSH2	-	AT5G27380.1	18.2901506	1	5_9668440	0.0122	1.08	0.0206	T:C
AT5G27430	AT5G27430	+	AT5G27430.1	30.4701092	1	5_9689178	0.106	0.166	0.0992	A:G
AT5G27450	MVK	+	AT5G27450.1,AT5G27450.2,AT5G27450.3	8.4861764,NA	2	5_9692893,5_9692773	0.193,0.144	0.73,0.804	0.00044,0.000767	A:G,A:G
AT5G27470	AT5G27470	+	AT5G27470.1	35.6884294	1	5_9696901	0.00806	1.22	0.0104	A:G
AT5G27560	AT5G27560	+	AT5G27560.1,AT5G27560.2	20.950568,0.059038	2	5_9732872,5_9732804	0.0382,0.0201	0.919,1.65	0.0476,0.0497	A:G,A:G
AT5G27640	TIF3B1	-	AT5G27640.1,AT5G27640.2	27.1998392,0.0705854	1	5_9781225	0.155	0.556	8.13e-06	T:C
AT5G27700	RPS21C	-	AT5G27700.1	1680.8611994	3	5_9807490,5_9807569,5_9807473	0.0167,0.0152,0.0135	1.03,0.406,1.19	0.000142,0.000274,0.00638	T:C,T:C,T:C
AT5G27770	RPL22C	+	AT5G27770.1	1025.2489292	2	5_9837104,5_9836359	0.0731,0.0156	0.309,0.174	5.96e-09,0.0369	A:G,A:G
AT5G27820	AT5G27820	+	AT5G27820.1	34.3450312	1	5_9860882	0.107	1.28	0.0518	A:G
AT5G27850	RPL18C	+	AT5G27850.1,AT5G27850.2	811.0115884,0	14	5_9874300,5_9874290,5_9873408,5_9873648,5_9873898,5_9874148,5_9873525,5_9873616,5_9874349,5_9874275,5_9874019,5_9874248,5_9873631,5_9873990	0.0453,0.0629,0.0275,0.0317,0.0218,0.0544,0.0672,0.00227,0.00535,0.0128,0.00589,0.019,0.00681,0.00347	0.613,0.468,0.356,0.398,0.164,0.252,0.173,0.663,0.997,0.469,0.342,0.363,0.369,0.562	3.14e-12,6.21e-09,2.56e-08,4.97e-07,1.39e-05,2.85e-05,0.00718,0.0108,0.0153,0.0158,0.0232,0.0296,0.0369,0.0969	A:G,A:G,A:G,A:G,A:G,A:G,A:G,A:G,A:G,A:G,A:G,A:G,A:G,A:G
AT5G28060	RPS24B	-	AT5G28060.1	853.5641086	1	5_10070438	0.00109	1.41	0.0162	T:C
AT5G28750	TATA	-	AT5G28750.1	304.198603	2	5_10784193,5_10784185	0.04,0.00366	0.508,1.46	0.000393,0.0705	T:C,T:C
AT5G30510	RPS1	-	AT5G30510.1	218.206316	4	5_11620241,5_11620174,5_11621064,5_11620242	0.186,0.0174,0.0161,0.00165	0.483,0.646,0.525,3.03	3.64e-29,1.64e-07,0.00152,0.0117	T:C,T:C,T:C,T:C
AT5G32450	AT5G32450	+	AT5G32450.1	43.6678672	1	5_12081070	0.131	0.317	0.00883	A:G
AT5G33320	PPT1	+	AT5G33320.1	45.3483512	1	5_12590647	0.0474	0.486	0.00434	A:G
AT5G34850	PAP26	-	AT5G34850.1	52.4545596	3	5_13108430,5_13110969,5_13109825	0.0333,0.0172,0.0176	0.686,0.703,0.243	0.00148,0.0357,0.0591	T:C,T:C,T:C
AT5G35170	AT5G35170	+	AT5G35170.1,AT5G35170.2	14.4757516,0.1527076	1	5_13423578	0.0896	2.79	3.51e-05	A:G
AT5G35360	CAC2	+	AT5G35360.1,AT5G35360.3,AT5G35360.2	80.1032196,0.0541904,0.0078112	6	5_13585241,5_13584968,5_13585357,5_13586651,5_13586745,5_13586705	0.00891,0.0181,0.0075,0.0224,0.0152,0.0224	0.626,0.702,1.44,0.486,1,0.554	0.00049,0.0157,0.0223,0.0453,0.0458,0.0833	A:G,A:G,A:G,A:G,A:G,A:G
AT5G35530	RPS3C	-	AT5G35530.1	251.541154	1	5_13711736	0.128	0.0823	0.0116	T:C
AT5G35590	PAA1	-	AT5G35590.1	82.7211562	1	5_13765403	0.25	0.369	1.82e-06	T:C
AT5G35630	GLN2	+	AT5G35630.1,AT5G35630.2,AT5G35630.3	700.40869,NA	10	5_13832533,5_13832852,5_13832762,5_13832817,5_13833238,5_13833295,5_13833107,5_13833142,5_13833130,5_13832750	0.0244,0.00906,0.00413,0.0115,0.00272,0.00934,0.00164,0.00173,0.000829,0.000777	0.465,0.303,1.03,0.431,1.79,0.817,1.46,0.866,2.44,1.94	1.67e-10,1.06e-06,3.13e-05,0.00108,0.00134,0.00191,0.00204,0.00489,0.0102,0.0385	A:G,A:G,A:G,A:G,A:G,A:G,A:G,A:G,A:G,A:G
AT5G35970	AT5G35970	-	AT5G35970.1	22.9984214	2	5_14119285,5_14119300	0.111,0.00735	0.223,1.83	0.0835,0.097	T:C,T:C
AT5G36160	TAT	-	AT5G36160.1	14.2675632	1	5_14233318	0.0324	1.54	0.00203	T:C
AT5G36230	AT5G36230	+	AT5G36230.1,AT5G36230.2	62.2978388,0.144766	2	5_14275208,5_14276083	0.112,0.0352	0.401,0.274	0.0347,0.0483	A:G,A:G
AT5G37510	EMB1467	+	AT5G37510.1,AT5G37510.2	28.7429102,0	1	5_14900234	0.0365	0.71	0.0778	A:G
AT5G38410	RBCS-3B	-	AT5G38410.1,AT5G38410.2,AT5G38410.3	9014.123291,8.665798,3.217159	1	5_15377550	0.000997	0.754	0.0492	T:C
AT5G38520	AT5G38520	+	AT5G38520.1,AT5G38520.2	59.9833716,0.1928402	2	5_15422625,5_15423084	0.0148,0.0374	1.36,1.24	1.74e-06,2.42e-05	A:G,A:G
AT5G39740	RPL5B	+	AT5G39740.1,AT5G39740.2	369.4936022,NA	2	5_15904167,5_15905140	0.0281,0.00467	0.67,1.28	2.01e-10,0.00035	A:G,A:G
AT5G40370	GRXC2	-	AT5G40370.1,AT5G40370.2	292.1368834,0.1283062	1	5_16147837	0.00808	1.72	0.0425	T:C
AT5G40770	PHB3	-	AT5G40770.1	92.5602964	1	5_16315431	0.069	0.225	0.0292	T:C
AT5G40830	AT5G40830	-	AT5G40830.1,AT5G40830.3	7.854495,0.2551292	1	5_16355008	0.158	0.766	0.000756	T:C
AT5G40950	RPL27	+	AT5G40950.1	736.4488324	2	5_16411167,5_16411827	0.0168,0.00275	0.346,1.17	2.46e-05,0.00774	A:G,A:G
AT5G41520	RPS10B	-	AT5G41520.1,AT5G41520.2	348.628417,0	5	5_16610071,5_16610057,5_16610030,5_16609251,5_16609873	0.0109,0.00689,0.0144,0.0102,0.0205	0.416,0.501,0.418,2.06,0.406	0.00248,0.00557,0.00672,0.0125,0.0835	T:C,T:C,T:C,T:C,T:C
AT5G41700	UBC8	+	AT5G41700.1,AT5G41700.4,AT5G41700.3	291.2315306,0.4254764,0.3298286	2	5_16676115,5_16676112	0.00511,0.0503	0.708,0.333	0.019,0.0354	A:G,A:G
AT5G42020	MED37F	-	AT5G42020.1,AT5G42020.3,AT5G42020.2	42.484369,0.0348976,0.0127496	1	5_16807698	0.0429	0.35	0.0105	T:C
AT5G42300	UBL5	-	AT5G42300.1	833.9260704	3	5_16912568,5_16913615,5_16913612	0.0139,0.0179,0.00636	1.24,0.483,1.14	8.76e-05,0.00321,0.0121	T:C,T:C,T:C
AT5G42390	AT5G42390	+	AT5G42390.1	12.7887538	1	5_16952633	0.329	0.266	1.76e-05	A:G
AT5G42480	ARC6	+	AT5G42480.1,AT5G42480.2	8.763999,0.0584372	1	5_16988134	0.0231	2.34	0.0729	A:G
AT5G42740	PGIC	+	AT5G42740.1,AT5G42740.3	21.7478658,0	1	5_17140518	0.0122	2.01	0.0481	A:G
AT5G42765	AT5G42765	-	AT5G42765.1	28.53849	1	5_17151332	0.00669	1.17	0.0293	T:C
AT5G42790	PAF1	-	AT5G42790.1	78.0149684	2	5_17159192,5_17159507	0.167,0.0432	0.722,0.204	0.000114,0.0253	T:C,T:C
AT5G42850	AT5G42850	-	AT5G42850.1,AT5G42850.2	112.8059198,NA	1	5_17182291	0.0233	0.687	0.044	T:C
AT5G42950	AT5G42950	+	AT5G42950.1	3.9074664	1	5_17231160	0.0973	1.15	0.0224	A:G
AT5G43830	AT5G43830	-	AT5G43830.1	84.9821824	1	5_17622563	0.0481	0.207	0.0662	T:C
AT5G43940	ADH2	+	AT5G43940.1,AT5G43940.2	113.0046236,0.170224	1	5_17685821	0.00454	1.42	0.00115	A:G
AT5G43970	TOM9-2	+	AT5G43970.1	817.2917136	1	5_17693207	0.0316	0.287	0.0764	A:G
AT5G45170	AT5G45170	-	AT5G45170.1,AT5G45170.2	16.8086494,0.0244306	1	5_18271792	0.0878	1.09	5.21e-05	T:C
AT5G45350	AT5G45350	-	AT5G45350.1,AT5G45350.3	58.9486436,1.406816	1	5_18382119	0.0423	0.686	0.0441	T:C
AT5G45390	CLPP4	+	AT5G45390.1	189.7836764	14	5_18397823,5_18397948,5_18397976,5_18397977,5_18397601,5_18397826,5_18397947,5_18397892,5_18397975,5_18397587,5_18397833,5_18397591,5_18397604,5_18397885	0.205,0.124,0.0255,0.058,0.0114,0.0112,0.00637,0.0156,0.0345,0.0182,0.00588,0.00217,0.00375,0.0274	0.408,0.859,1.94,0.759,0.686,0.336,2.45,0.734,0.699,0.384,0.89,1.13,1.02,0.487	3.48e-19,2.17e-16,4.71e-07,2.19e-06,0.0019,0.00256,0.00397,0.00432,0.0174,0.0212,0.0307,0.0377,0.0501,0.0871	A:G,A:G,A:G,A:G,A:G,A:G,A:G,A:G,A:G,A:G,A:G,A:G,A:G,A:G
AT5G45420	AT5G45420	-	AT5G45420.1,AT5G45420.2	15.7453652,NA	1	5_18404320	0.037	1.85	0.000843	T:C
AT5G45430	AT5G45430	+	AT5G45430.1,AT5G45430.2	18.0116576,0.3137766	1	5_18410943	0.095	1.12	5.4e-06	A:G
AT5G46020	AT5G46020	-	AT5G46020.1	127.2337436	2	5_18662994,5_18663388	0.11,0.0177	0.781,0.857	5.42e-06,0.00478	T:C,T:C
AT5G46430	RPL32B	+	AT5G46430.1,AT5G46430.2	890.3192998,NA	1	5_18834418	0.00413	0.938	0.0975	A:G
AT5G46630	AP2M	+	AT5G46630.1,AT5G46630.2	20.3298924,0.071517	2	5_18922567,5_18922506	0.0282,0.0264	1.27,1.08	0.0307,0.0986	A:G,A:G
AT5G47030	AT5G47030	+	AT5G47030.1	211.5963326	7	5_19092076,5_19092209,5_19092053,5_19092106,5_19092075,5_19091940,5_19092072	0.0415,0.232,0.0513,0.0267,0.0428,0.0489,0.0312	0.633,0.354,0.224,0.699,0.27,0.288,0.421	0.000261,0.000841,0.00429,0.00711,0.00937,0.0182,0.0262	A:G,A:G,A:G,A:G,A:G,A:G,A:G
AT5G47110	LIL3:2	-	AT5G47110.1	188.1826568	2	5_19134161,5_19134390	0.0103,0.00273	1.62,1.67	0.00425,0.0961	T:C,T:C
AT5G47210	AT5G47210	-	AT5G47210.1,AT5G47210.2,AT5G47210.3	255.6215476,44.3741146,5.506471	1	5_19169218	0.0995	0.33	1.89e-09	T:C
AT5G47570	AT5G47570	-	AT5G47570.1	511.6509926	2	5_19292839,5_19292837	0.244,0.0209	0.201,0.461	0.0063,0.00974	T:C,T:C
AT5G47700	RPP1C	-	AT5G47700.1,AT5G47700.2	3456.560541,NA	1	5_19327956	0.0179	0.833	0.000988	T:C
AT5G47840	AMK2	+	AT5G47840.1,AT5G47840.2	65.672058,1.0150342	2	5_19378172,5_19378075	0.0355,0.0318	1.08,0.473	0.00343,0.03	A:G,A:G
AT5G47890	AT5G47890	+	AT5G47890.1	431.5753674	2	5_19390394,5_19390402	0.0586,0.0599	0.401,0.418	0.00143,0.00282	A:G,A:G
AT5G47930	RPS27D	-	AT5G47930.1	2590.5391226	1	5_19406372	0.0162	0.43	0.0499	T:C
AT5G48230	AAT1	-	AT5G48230.2,AT5G48230.1	35.8841836,0.5701178	2	5_19552634,5_19554675	0.128,0.017	0.628,2.03	8.89e-05,0.000696	T:C,T:C
AT5G48300	APS1	+	AT5G48300.1	69.300799	3	5_19572499,5_19572092,5_19572498	0.477,0.0252,0.00308	0.346,0.592,2.05	1.05e-09,0.00285,0.0581	A:G,A:G,A:G
AT5G48790	AT5G48790	-	AT5G48790.1,AT5G48790.2	21.201877,3.1068184	1	5_19780772	0.0582	0.87	0.0051	T:C
AT5G48810	CYTB5-D	-	AT5G48810.1	425.2079108	1	5_19789404	0.0209	0.178	0.0451	T:C
AT5G49020	PRMT14	+	AT5G49020.1,AT5G49020.2	6.2916508,0.99977	1	5_19874627	0.118	1.39	0.000248	A:G
AT5G49510	PFD3	+	AT5G49510.1,AT5G49510.2	45.5638892,NA	1	5_20082092	0.138	0.483	1.87e-05	A:G
AT5G49650	XK-2	+	AT5G49650.1,AT5G49650.2	9.3100878,0	1	5_20155476	0.0926	0.486	0.0419	A:G
AT5G50250	CP31B	-	AT5G50250.1	45.8424848	1	5_20453036	0.0635	0.39	8.73e-05	T:C
AT5G50920	CLPC1	-	AT5G50920.1	99.0306106	2	5_20715639,5_20715644	0.0109,0.0051	1.3,2.18	0.00377,0.0461	T:C,T:C
AT5G51180	AT5G51180	+	AT5G51180.1,AT5G51180.2	7.945243,NA	1	5_20798308	0.0858	1.2	0.0787	A:G
AT5G51660	CPSF160	+	AT5G51660.1,AT5G51660.4,AT5G51660.2,AT5G51660.3	2.5898722,0.0175066,0.01548,0.0033048	1	5_20988989	0.0618	1.53	0.0902	A:G
AT5G52100	DAPB3	+	AT5G52100.1	27.706424	2	5_21172156,5_21172188	0.0951,0.0162	0.36,2.1	0.0483,0.0765	A:G,A:G
AT5G52440	TATB	+	AT5G52440.1	50.7942306	1	5_21287066	0.0755	0.376	0.0022	A:G
AT5G52540	AT5G52540	-	AT5G52540.1	12.1577426	1	5_21321885	0.0607	0.225	0.037	T:C
AT5G52650	RPS10C	-	AT5G52650.1	462.8154118	6	5_21355690,5_21355745,5_21355689,5_21355818,5_21356146,5_21355777	0.0616,0.0238,0.0311,0.00812,0.00527,0.00188	0.945,0.684,1.26,0.795,0.476,4.13	2.76e-06,2.62e-05,0.000114,0.00293,0.0227,0.0302	T:C,T:C,T:C,T:C,T:C,T:C
AT5G52920	PKP2	+	AT5G52920.1	58.8417926	5	5_21466364,5_21466524,5_21465753,5_21465912,5_21466337	0.0429,0.045,0.0529,0.0162,0.00525	1.04,1.39,0.524,0.894,3.81	4.2e-07,3.68e-06,2.31e-05,0.00589,0.0134	A:G,A:G,A:G,A:G,A:G
AT5G53140	AT5G53140	+	AT5G53140.1,AT5G53140.2	33.0528478,NA	1	5_21548640	0.0469	0.763	0.0116	A:G
AT5G53170	FTSH11	-	AT5G53170.1	12.2405204	1	5_21566498	0.033	2.88	0.0319	T:C
AT5G53180	ATPTB2	-	AT5G53180.1,AT5G53180.6,AT5G53180.4,AT5G53180.2,AT5G53180.5,AT5G53180.3	7.0252746,1.087799,0.5111164,0.4194494,0.2369804,0.082804	2	5_21568331,5_21568353	0.102,0.0769	1.42,1.64	0.0563,0.0863	T:C,T:C
AT5G53300	UBC10	-	AT5G53300.1,AT5G53300.2,AT5G53300.4	481.7835188,NA	1	5_21632679	0.0787	0.552	4.31e-05	T:C
AT5G53560	CYTB5-E	+	AT5G53560.1	353.2758778	2	5_21760168,5_21760346	0.0314,0.0275	0.353,0.56	0.000486,0.0398	A:G,A:G
AT5G54280	VIII-2	-	AT5G54280.2,AT5G54280.1	0.882125,0.0048054	1	5_22038499	0.000566	-0.962	0.0965	T:C
AT5G54430	ATPHOS32	-	AT5G54430.1,AT5G54430.3,AT5G54430.2	54.4389456,1.0760546,0.0849894	1	5_22099019	0.038	0.409	0.000756	T:C
AT5G54440	TRS130	+	AT5G54440.1,AT5G54440.2,AT5G54440.3	3.4489064,0.2213676,0	1	5_22104842	0.0829	1.79	0.03	A:G
AT5G54600	RPL24	+	AT5G54600.1,AT5G54600.2	470.288292,0.1548428	5	5_22184402,5_22184209,5_22184277,5_22183093,5_22184365	0.0475,0.0125,0.00965,0.0056,0.0122	0.8,1.18,1.26,1.16,0.985	1.16e-13,3e-10,0.000107,0.000371,0.0258	A:G,A:G,A:G,A:G,A:G
AT5G54670	ATK3	+	AT5G54670.1,AT5G54670.3	3.353863,0	1	5_22213520	0.0765	0.328	0.0392	A:G
AT5G54980	AT5G54980	+	AT5G54980.1	14.2763876	1	5_22316311	0.0479	1.09	0.00019	A:G
AT5G55070	AT5G55070	+	AT5G55070.1	28.127651	3	5_22350479,5_22350515,5_22350514	0.128,0.0947,0.0413	0.94,1.08,1.17	6.21e-06,0.00056,0.00393	A:G,A:G,A:G
AT5G55190	RAN3	+	AT5G55190.1	146.4214016	2	5_22393296,5_22392457	0.0285,0.0457	0.137,0.323	0.0145,0.0174	A:G,A:G
AT5G55220	TIG	+	AT5G55220.1	36.598577	2	5_22400670,5_22400692	0.0632,0.115	0.987,0.619	3.99e-06,0.000543	A:G,A:G
AT5G55300	TOP1	-	AT5G55300.1,AT5G55300.2,AT5G55300.3	2.1272532,0.4872686,0.4334526	1	5_22425064	0.0534	2.11	0.0279	T:C
AT5G56010	HSP90-3	+	AT5G56010.1	52.9497378	1	5_22682791	0.0156	0.656	0.0317	A:G
AT5G56150	UBC30	+	AT5G56150.1,AT5G56150.2	28.7708228,0.1554296	1	5_22730835	0.0459	0.528	0.0614	A:G
AT5G56670	RPS30C	-	AT5G56670.1	5894.9933148	1	5_22935404	0.0713	0.135	0.00248	T:C
AT5G57080	AT5G57080	+	AT5G57080.1	20.9082958	1	5_23099356	0.154	0.881	0.0476	A:G
AT5G57300	COQ5	-	AT5G57300.1,AT5G57300.2,AT5G57300.3,AT5G57300.4	16.9326656,NA	1	5_23208751	0.204	0.392	0.0558	T:C
AT5G57350	AHA3	-	AT5G57350.1,AT5G57350.3	6.8756844,2.326599	2	5_23231178,5_23231175	0.0972,0.0467	0.927,0.561	0.0318,0.0681	T:C,T:C
AT5G57850	DAAT	-	AT5G57850.1,AT5G57850.2	22.4950998,0	1	5_23435906	0.0101	2.39	0.00142	T:C
AT5G58240	FHIT	-	AT5G58240.1,AT5G58240.3,AT5G58240.2	25.432305,1.806733,0	2	5_23558845,5_23559274	0.0701,0.0337	0.599,1.16	0.00207,0.0465	T:C,T:C
AT5G58290	RPT3	+	AT5G58290.1	48.614437	1	5_23571215	0.0707	0.531	0.0965	A:G
AT5G58330	AT5G58330	-	AT5G58330.1,AT5G58330.2,AT5G58330.3	78.2958354,29.3610684,27.470504	4	5_23579980,5_23579836,5_23580016,5_23581117	0.053,0.0507,0.0141,0.00742	0.411,1.32,0.245,0.912	6.8e-06,0.00475,0.0111,0.0741	T:C,T:C,T:C,T:C
AT5G58560	AT5G58560	+	AT5G58560.1	15.0455918	1	5_23672746	0.0805	2.48	0.0698	A:G
AT5G58710	CYP20-1	+	AT5G58710.1	117.3211682	2	5_23719437,5_23719020	0.027,0.00926	0.438,0.615	0.00478,0.0472	A:G,A:G
AT5G58740	AT5G58740	-	AT5G58740.1	85.9074798	2	5_23727237,5_23725903	0.0181,0.0444	1.11,1.26	0.00164,0.0104	T:C,T:C
AT5G59250	AT5G59250	+	AT5G59250.1	20.7398286	1	5_23906796	0.0464	1.84	0.00283	A:G
AT5G59613	AT5G59613	-	AT5G59613.2,AT5G59613.1	2888.3262802,10.2797284	4	5_24016177,5_24015619,5_24015690,5_24015610	0.107,0.0423,0.00336,0.00676	0.123,0.332,0.504,1.18	2.27e-06,4.14e-06,0.0812,0.0916	T:C,T:C,T:C,T:C
AT5G59840	AT5G59840	-	AT5G59840.1	13.6781832	1	5_24107429	0.0799	1.2	0.0264	T:C
AT5G59880	ADF3	+	AT5G59880.1,AT5G59880.2	475.246421,0.195659	2	5_24121507,5_24121187	0.00468,0.0017	1.21,4.04	0.000899,0.00241	A:G,A:G
AT5G60360	ALEU	+	AT5G60360.1,AT5G60360.3,AT5G60360.2	73.495108,16.5404886,0	2	5_24281326,5_24281485	0.0267,0.0113	0.291,0.181	0.0182,0.0626	A:G,A:G
AT5G60390	A3	+	AT5G60390.1,AT5G60390.2,AT5G60390.3	978.1205312,NA	13	5_24290443,5_24290581,5_24290568,5_24290633,5_24288723,5_24290605,5_24289840,5_24290604,5_24290725,5_24290442,5_24290382,5_24290527,5_24290352	0.0765,0.019,0.119,0.00694,0.0129,0.00644,0.0102,0.00464,0.00126,0.00255,0.00331,0.00292,0.00336	0.344,0.373,0.174,0.456,0.382,0.472,0.216,0.454,1.74,0.349,0.251,0.316,0.285	9.49e-28,1.39e-06,0.000338,0.000994,0.00832,0.00933,0.00961,0.0182,0.0213,0.0248,0.0316,0.0675,0.0959	A:G,A:G,A:G,A:G,A:G,A:G,A:G,A:G,A:G,A:G,A:G,A:G,A:G
AT5G60540	PDX2	-	AT5G60540.1	18.7497702	1	5_24336924	0.118	0.522	0.075	T:C
AT5G60790	ABCF1	-	AT5G60790.1	34.9205982	1	5_24453894	0.0165	1.05	0.0771	T:C
AT5G61170	RPS19C	+	AT5G61170.1	803.503524	1	5_24612182	0.0455	0.329	6.83e-05	A:G
AT5G61240	AT5G61240	+	AT5G61240.1,AT5G61240.2	16.4325074,0.0183666	1	5_24632010	0.145	1.03	0.00077	A:G
AT5G61310	AT5G61310	-	AT5G61310.1,AT5G61310.2,AT5G61310.3,AT5G61310.4,AT5G61310.5,AT5G61310.6	115.5676604,NA	1	5_24653488	0.172	0.798	0.0263	T:C
AT5G61410	RPE	-	AT5G61410.1,AT5G61410.2	207.750592,NA	3	5_24684460,5_24685014,5_24684073	0.0285,0.00409,0.0246	0.823,1.04,0.364	1.41e-10,0.0403,0.0514	T:C,T:C,T:C
AT5G62190	RH7	-	AT5G62190.1	26.4514068	1	5_24981329	0.0396	0.91	0.0186	T:C
AT5G62670	AHA11	+	AT5G62670.1	9.2802646	1	5_25165004	0.117	1.18	0.0113	A:G
AT5G62700	TUBB2	+	AT5G62700.1	118.7708226	1	5_25186221	0.00417	1.2	0.0131	A:G
AT5G63310	NDPK2	-	AT5G63310.1	337.487538	2	5_25372112,5_25372143	0.00342,0.0386	1.67,0.123	0.00285,0.0392	T:C,T:C
AT5G63400	ADK1	-	AT5G63400.1	161.758832	1	5_25393550	0.184	0.192	1.47e-06	T:C
AT5G63510	GAMMACAL1	+	AT5G63510.1,AT5G63510.2	67.8246522,0.5694182	1	5_25425246	0.0861	0.271	0.00291	A:G
AT5G63570	GSA1	+	AT5G63570.1,AT5G63570.2	83.5374248,0	2	5_25453605,5_25453350	0.0315,0.0529	0.666,0.0601	0.000416,0.0495	A:G,A:G
AT5G63620	AT5G63620	-	AT5G63620.1,AT5G63620.3,AT5G63620.2	7.7362118,0.0730134,0.0474492	1	5_25466311	0.274	0.541	0.0267	T:C
AT5G63840	PSL5	+	AT5G63840.2,AT5G63840.1	14.9592532,0	3	5_25548639,5_25546609,5_25547955	0.259,0.0558,0.0165	0.169,0.723,0.996	0.0179,0.0267,0.0504	A:G,A:G,A:G
AT5G64050	ATERS	-	AT5G64050.1	27.0543036	4	5_25631676,5_25630075,5_25630073,5_25630074	0.321,0.359,0.459,0.0981	0.471,0.564,0.383,1.06	1.3e-18,8.72e-05,0.00182,0.0126	T:C,T:C,T:C,T:C
AT5G64140	RPS28C	-	AT5G64140.1	2382.4764008	1	5_25667540	0.00964	-0.0659	0.0743	T:C
AT5G64150	AT5G64150	-	AT5G64150.1	9.1717088	1	5_25669072	0.0691	1.68	0.00979	T:C
AT5G64200	SC35	-	AT5G64200.1,AT5G64200.2	27.2611402,NA	1	5_25681794	0.266	0.452	0.00453	T:C
AT5G64350	FKBP12	-	AT5G64350.1	1454.0578154	5	5_25734755,5_25735287,5_25735499,5_25735270,5_25734790	0.0171,0.0724,0.000696,0.00131,0.0159	0.835,0.261,1.44,1.31,0.559	0.000336,0.00125,0.0337,0.0354,0.0408	T:C,T:C,T:C,T:C,T:C
AT5G64400	AT5G64400	+	AT5G64400.1,AT5G64400.2,AT5G64400.3	437.038139,2.4855792,0	2	5_25749781,5_25749759	0.0205,0.0101	0.213,0.454	0.000134,0.000578	A:G,A:G
AT5G64580	AT5G64580	-	AT5G64580.1	7.652323	1	5_25817666	0.0745	0.517	0.062	T:C
AT5G64670	AT5G64670	-	AT5G64670.1	41.6848164	1	5_25852595	0.0717	0.152	0.0781	T:C
AT5G64940	ATATH13	+	AT5G64940.1,AT5G64940.2	40.0184224,NA	1	5_25953594	0.0426	0.718	0.091	A:G
AT5G65220	RPL29	+	AT5G65220.1	998.7733796	6	5_26062448,5_26062461,5_26062464,5_26062365,5_26062451,5_26062467	0.257,0.0243,0.0283,0.00283,0.00607,0.0121	0.387,0.753,0.653,0.798,0.658,0.282	1.1e-24,6e-17,1.21e-13,0.00246,0.0102,0.0821	A:G,A:G,A:G,A:G,A:G,A:G
AT5G65260	PABN2	-	AT5G65260.1	56.3145162	3	5_26080761,5_26080316,5_26080446	0.106,0.458,0.196	0.248,0.62,0.421	0.000284,0.000412,0.000413	T:C,T:C,T:C
AT5G66040	STR16	+	AT5G66040.1,AT5G66040.2	469.8306908,81.18809	1	5_26410958	0.0671	0.281	2.01e-05	A:G
AT5G66190	LFNR1	-	AT5G66190.1,AT5G66190.2	283.1285014,0	5	5_26452028,5_26452044,5_26451443,5_26452036,5_26452782	0.0102,0.00542,0.00515,0.00161,0.00863	1.29,0.817,0.881,1.16,0.407	9.46e-11,7.79e-06,0.0203,0.0708,0.0995	T:C,T:C,T:C,T:C,T:C
AT5G66570	PSBO1	+	AT5G66570.1	1677.1191142	1	5_26569712	0.000636	1.4	0.0159	A:G
AT5G66680	OST48	-	AT5G66680.1	34.2415976	1	5_26619882	0.00732	1.88	0.0133	T:C
AT5G66860	AT5G66860	-	AT5G66860.1	50.678176	1	5_26701926	0.185	0.237	0.0591	T:C
AT5G67270	EB1C	-	AT5G67270.1	15.3934644	1	5_26840639	0.0182	1.53	0.0503	T:C
AT5G67500	VDAC2	+	AT5G67500.3,AT5G67500.1,AT5G67500.2	44.5204936,0.1259168,0.0365322	1	5_26937078	0.0684	0.328	0.000687	A:G
AT5G67590	FRO1	+	AT5G67590.1	214.333417	5	5_26959409,5_26959351,5_26958991,5_26959352,5_26959389	0.0228,0.042,0.00276,0.0333,0.0434	0.858,0.488,1.59,0.689,0.656	0.00195,0.0144,0.0269,0.0283,0.0509	A:G,A:G,A:G,A:G,A:G

## Sheet: HITS ECT2 roots
ID	GENE	TRANSCRIPTS	NAME	STRAND	REF	TARG	PROP	COUNT	log2FC	p-adj
1_1216452	AT1G04480	AT1G04480.1	RPL23C	+	A	G	0.0314157	348	-0.512263	0.00093907
1_1216367	AT1G04480	AT1G04480.1	RPL23C	+	A	G	0.0207713	258	-0.422868	0.0755663
1_2828782	AT1G08830	AT1G08830.1,AT1G08830.2	CSD1	+	A	G	0.0503453	226	0.695114	0.0550652
1_3166919	AT1G09780	AT1G09780.1	PGM1	-	T	C	0.032034	332	0.801434	0.000178377
1_4375840	AT1G12840	AT1G12840.1	VHA-C	+	A	G	0.112189	821	0.448693	0.0398462
1_5711825	AT1G16700	AT1G16700.1	AT1G16700	+	A	G	0.290749	462	0.40407	0.0920246
1_7878976	AT1G22300	AT1G22300.1,AT1G22300.2,AT1G22300.3	GRF10	-	T	C	0.0685025	301	0.720004	0.0035423
1_7879274	AT1G22300	AT1G22300.1,AT1G22300.2,AT1G22300.3	GRF10	-	T	C	0.0511509	280	0.615489	0.0285833
1_9533929	AT1G27450	AT1G27450.4,AT1G27450.1,AT1G27450.2,AT1G27450.3	APT1	+	A	G	0.138081	541	0.799141	7.0635e-08
1_9533931	AT1G27450	AT1G27450.4,AT1G27450.1,AT1G27450.2,AT1G27450.3	APT1	+	A	G	0.0599527	228	1.09208	0.000201521
1_9533930	AT1G27450	AT1G27450.4,AT1G27450.1,AT1G27450.2,AT1G27450.3	APT1	+	A	G	0.0574652	219	1.10593	0.000336631
1_9747221	AT1G27970	AT1G27970.1,AT1G27970.2	NTF2	+	A	G	0.00500259	29	2.8606	0.0243083
1_10472983	AT1G29900	AT1G29900.1	CARB	+	A	G	0.12987	14	-2.02499	0.0571177
1_10831808	AT1G30580	AT1G30580.1	AT1G30580	-	T	C	0.269153	534	0.547164	0.0109838
1_10832040	AT1G30580	AT1G30580.1	AT1G30580	-	T	C	0.00697051	52	1.36341	0.0998833
1_17321277	AT1G47260	AT1G47260.1	GAMMACA2	-	T	C	0.114343	283	0.704353	0.00984226
1_17321398	AT1G47260	AT1G47260.1	GAMMACA2	-	T	C	0.074785	374	0.458562	0.0753125
1_18518500	AT1G50010	AT1G50010.1	TUBA4	+	A	G	0.0243578	256	0.677486	0.0142462
1_18518414	AT1G50010	AT1G50010.1	TUBA4	+	A	G	0.00459902	64	1.54406	0.0269287
1_18518317	AT1G50010	AT1G50010.1	TUBA4	+	A	G	0.00822618	103	1.07411	0.030164
1_18871460	AT1G50920	AT1G50920.1	AT1G50920	+	A	G	0.0686813	125	0.990811	0.0197987
1_19153678	AT1G51650	AT1G51650.1	AT1G51650	+	A	G	0.0270604	482	0.612663	0.000403182
1_19153780	AT1G51650	AT1G51650.1	AT1G51650	+	A	G	0.0341124	324	0.544711	0.0524337
1_19170253	AT1G51690	AT1G51690.2,AT1G51690.5,AT1G51690.1,AT1G51690.4,AT1G51690.3	PP2AB1	+	A	G	0.221374	87	1.12054	0.0263454
1_19170257	AT1G51690	AT1G51690.2,AT1G51690.5,AT1G51690.1,AT1G51690.4,AT1G51690.3	PP2AB1	+	A	G	0.0586592	21	2.92103	0.0980792
1_19176194	AT1G51710	AT1G51710.1,AT1G51710.2	UBP6	-	T	C	0.0236559	44	1.47866	0.0852238
1_19366056	AT1G52070	AT1G52070.1,AT1G52070.2	JAL10	-	T	C	0.00234351	38	1.92403	0.0802568
1_19854827	AT1G53240	AT1G53240.1	mMDH1	-	T	C	0.0130708	77	2.8081	1.12517e-07
1_19854861	AT1G53240	AT1G53240.1	mMDH1	-	T	C	0.122264	849	0.518695	0.000592285
1_20246617	AT1G54220	AT1G54220.1,AT1G54220.2	AT1G54220	-	T	C	0.287625	172	0.810886	0.0102942
1_24228790	AT1G65220	AT1G65220.1	AT1G65220	+	A	G	0.115143	238	0.781725	0.0066535
1_25236051	AT1G67350	AT1G67350.1,AT1G67350.2	AT1G67350	+	A	G	0.0648185	989	0.38162	0.00849153
1_25236609	AT1G67350	AT1G67350.1,AT1G67350.2	AT1G67350	+	A	G	0.0490503	501	0.440355	0.051276
1_25600631	AT1G68310	AT1G68310.2,AT1G68310.1	AE7	+	A	G	0.0197926	21	3.03828	0.0912591
1_27109454	AT1G72020	AT1G72020.1	AT1G72020	-	T	C	0.0382337	342	0.619766	0.012224
1_28594513	AT1G76200	AT1G76200.1	AT1G76200	+	A	G	0.189464	2068	0.345331	0.00456139
1_28594553	AT1G76200	AT1G76200.1	AT1G76200	+	A	G	0.0364739	379	0.581027	0.0184528
1_28594580	AT1G76200	AT1G76200.1	AT1G76200	+	A	G	0.0317092	287	0.608031	0.0685959
1_28594648	AT1G76200	AT1G76200.1	AT1G76200	+	A	G	0.00716113	28	2.28147	0.0767958
1_28594560	AT1G76200	AT1G76200.1	AT1G76200	+	A	G	0.160838	1536	0.327386	0.0879495
1_28853487	AT1G76850	AT1G76850.1	SEC5A	+	A	G	0.0492537	33	2.40099	0.0685959
1_29304014	AT1G77940	AT1G77940.1	RPL30B	-	T	C	0.0326184	73	1.27955	0.0175462
1_29346524	AT1G78040	AT1G78040.2,AT1G78040.3,AT1G78040.1	AT1G78040	+	A	G	0.0236979	637	0.409321	0.0338838
1_29916440	AT1G79530	AT1G79530.1	GAPCP1	-	T	C	0.0119677	111	0.974395	0.0630743
1_29925248	AT1G79550	AT1G79550.2,AT1G79550.1	PGK	-	T	C	0.00131373	26	2.66692	0.0606452
2_490202	AT2G02050	AT2G02050.1	AT2G02050	+	A	G	0.0353392	212	0.715435	0.0195646
2_674549	AT2G02510	AT2G02510.1	AT2G02510	+	A	G	0.294737	1344	0.325708	0.0316157
2_674529	AT2G02510	AT2G02510.1	AT2G02510	+	A	G	0.130302	682	0.486271	0.0355663
2_673523	AT2G02510	AT2G02510.1	AT2G02510	+	A	G	0.0107457	83	1.28598	0.0423964
2_7461074	AT2G17130	AT2G17130.1,AT2G17130.2	IDH2	-	T	C	0.0337178	114	0.971481	0.0546037
2_7843681	AT2G18040	AT2G18040.1	PIN1	+	A	G	0.020037	65	1.33217	0.0694324
2_8806422	AT2G20420	AT2G20420.1	AT2G20420	+	A	G	0.00978871	82	1.38177	0.0122988
2_9320281	AT2G21870	AT2G21870.1,AT2G21870.2	MGP1	-	T	C	0.160829	574	0.496236	0.00165182
2_10902263	AT2G25610	AT2G25610.1,AT2G25610.2	VHA-c''2	-	T	C	0.0689588	353	0.748058	7.83937e-05
2_13412088	AT2G31490	AT2G31490.1	AT2G31490	+	A	G	0.0426693	305	0.669198	0.00450856
2_14019104	AT2G33040	AT2G33040.1	ATPC	-	T	C	0.00239782	44	1.95338	0.0366253
2_14019322	AT2G33040	AT2G33040.1	ATPC	-	T	C	0.00626556	73	1.19876	0.0641137
2_14047801	AT2G33150	AT2G33150.1	PED1	-	T	C	0.0324136	195	0.841035	0.019127
2_14805799	AT2G35120	AT2G35120.1	GDH2	-	T	C	0.0253807	80	1.40494	0.00935601
2_15322966	AT2G36530	AT2G36530.1,AT2G36530.2	ENO2	-	T	C	0.00270781	109	1.16271	0.0100098
2_15642912	AT2G37250	AT2G37250.1	ADK	+	A	G	0.00465529	21	2.96614	0.0897776
2_16593579	AT2G39780	AT2G39780.1,AT2G39780.2	RNS2	+	A	G	0.0305011	42	2.18144	0.01288
2_17412942	AT2G41740	AT2G41740.1,AT2G41740.2	VLN2	-	T	C	0.0320405	57	1.68328	0.0169761
2_17695339	AT2G42490	AT2G42490.1	AT2G42490	-	T	C	0.0501044	120	0.862105	0.078425
2_18046112	AT2G43460	AT2G43460.1	RPL38B	-	T	C	0.0231083	51	1.46008	0.0827577
2_18249222	AT2G44120	AT2G44120.1,AT2G44120.2	RPL7C	-	T	C	0.0999073	431	0.493018	0.0823482
3_150224	AT3G01390	AT3G01390.1,AT3G01390.2,AT3G01390.3,AT3G01390.4	VHA-G1	-	T	C	0.0209841	87	1.16563	0.0457601
3_1606094	AT3G05530	AT3G05530.1	RPT5A	+	A	G	0.321149	123	0.964494	0.0110812
3_14200076	AT3G06355	AT3G06355.1	NA	+	A	G	0.0433673	55	-1.13189	0.0128706
3_2389457	AT3G07480	AT3G07480.1	AT3G07480	+	A	G	0.139003	1113	0.294469	0.039136
3_2615653	AT3G08610	AT3G08610.1	AT3G08610	-	T	C	0.06834	599	0.581069	0.000191044
3_2616426	AT3G08610	AT3G08610.1	AT3G08610	-	T	C	0.0392003	451	0.558594	0.000721872
3_2616521	AT3G08610	AT3G08610.1	AT3G08610	-	T	C	0.0113083	144	1.16227	0.00218934
3_2615654	AT3G08610	AT3G08610.1	AT3G08610	-	T	C	0.0498793	434	0.569077	0.00452942
3_2615634	AT3G08610	AT3G08610.1	AT3G08610	-	T	C	0.0397309	313	0.582715	0.0128941
3_2616668	AT3G08610	AT3G08610.1	AT3G08610	-	T	C	0.0764768	870	0.36671	0.0236687
3_2616488	AT3G08610	AT3G08610.1	AT3G08610	-	T	C	0.407893	4920	0.268631	0.031127
3_3400492	AT3G10860	AT3G10860.1,AT3G10860.2	AT3G10860	+	A	G	0.0396416	823	0.375667	0.0036194
3_3400483	AT3G10860	AT3G10860.1,AT3G10860.2	AT3G10860	+	A	G	0.156247	3569	0.24388	0.00825432
3_3399912	AT3G10860	AT3G10860.1,AT3G10860.2	AT3G10860	+	A	G	0.0455642	1133	0.409645	0.0102135
3_3400501	AT3G10860	AT3G10860.1,AT3G10860.2	AT3G10860	+	A	G	0.0178821	358	0.601596	0.0344087
3_3400495	AT3G10860	AT3G10860.1,AT3G10860.2	AT3G10860	+	A	G	0.128845	2572	0.302647	0.0375633
3_3400526	AT3G10860	AT3G10860.1,AT3G10860.2	AT3G10860	+	A	G	0.0407272	681	0.363864	0.0489689
3_4004846	AT3G12600	AT3G12600.1,AT3G12600.2	NUDT16	+	A	G	0.107129	278	0.674749	0.0048769
3_4598184	AT3G13930	AT3G13930.1	AT3G13930	+	A	G	0.0382523	232	0.618135	0.0616605
3_4911845	AT3G14600	AT3G14600.1	RPL18AC	+	A	G	0.00354962	25	2.73207	0.0533842
3_5301350	AT3G15640	AT3G15640.1,AT3G15640.2	COX5B-1	+	A	G	0.0446875	331	0.656465	0.0279622
3_5301529	AT3G15640	AT3G15640.1,AT3G15640.2	COX5B-1	+	A	G	0.0858074	237	0.693834	0.0588775
3_5593418	AT3G16460	AT3G16460.1,AT3G16460.2	JAL34	+	A	G	0.00584243	136	0.936678	0.0169761
3_6485809	AT3G18820	AT3G18820.1	RABG3F	+	A	G	0.040117	192	0.88826	0.00246675
3_6880528	AT3G19820	AT3G19820.2,AT3G19820.1,AT3G19820.3	DIM	-	T	C	0.0693533	740	0.58564	6.89607e-06
3_8090423	AT3G22850	AT3G22850.1	AT3G22850	+	A	G	0.0588235	101	1.16309	0.0221212
3_8475061	AT3G23600	AT3G23600.1,AT3G23600.2	AT3G23600	+	A	G	0.0181269	354	0.763444	0.000112983
3_8475395	AT3G23600	AT3G23600.1,AT3G23600.2	AT3G23600	+	A	G	0.0107912	241	0.816826	0.00709441
3_8475521	AT3G23600	AT3G23600.1,AT3G23600.2	AT3G23600	+	A	G	0.0836945	1294	0.315697	0.0191525
3_10055997	AT3G27240	AT3G27240.1	CYC11	-	T	C	0.0875125	349	0.723765	0.00160184
3_10055983	AT3G27240	AT3G27240.1	CYC11	-	T	C	0.0729229	244	0.727676	0.0232252
3_10055984	AT3G27240	AT3G27240.1	CYC11	-	T	C	0.0184123	61	1.58325	0.0482679
3_10773232	AT3G28710	AT3G28710.1	VHA-D1	-	T	C	0.00732501	27	2.64698	0.0474865
3_14197251	AT3G41762	AT3G41762.1	AT3G41762	-	T	C	0.277482	939	0.533789	9.11724e-07
3_14229915	AT3G42050	AT3G42050.1	VHA-H	-	T	C	0.0574001	408	0.699826	0.000178377
3_14228705	AT3G42050	AT3G42050.1	VHA-H	-	T	C	0.0449095	206	0.905946	0.00152224
3_14231873	AT3G42050	AT3G42050.1	VHA-H	-	T	C	0.0597792	482	0.494729	0.00963105
3_14228913	AT3G42050	AT3G42050.1	VHA-H	-	T	C	0.00820645	83	1.29637	0.0221978
3_14228650	AT3G42050	AT3G42050.1	VHA-H	-	T	C	0.258468	641	0.410187	0.0491498
3_15664531	AT3G43810	AT3G43810.1,AT3G43810.3,AT3G43810.4	CAM7	-	T	C	0.0131682	67	2.03834	0.000259289
3_15664537	AT3G43810	AT3G43810.1,AT3G43810.3,AT3G43810.4	CAM7	-	T	C	0.0276479	136	0.818056	0.0725224
3_15800027	AT3G44010	AT3G44010.2,AT3G44010.1	RPS29A	-	T	C	0.0268857	72	1.38167	0.0128706
3_17649799	AT3G47833	AT3G47833.1	SDH7A	+	A	G	0.00550459	24	3.08957	0.0574399
3_18002357	AT3G48560	AT3G48560.1	ALS	-	T	C	0.0075392	25	2.56259	0.0778599
3_19318088	AT3G52090	AT3G52090.1,AT3G52090.2	NRPB11	-	T	C	0.00689893	20	2.83483	0.0992594
3_19365907	AT3G52200	AT3G52200.1,AT3G52200.2	LTA3	+	A	G	0.0146341	42	2.13356	0.0183841
3_19506699	AT3G52590	AT3G52590.1	RPL40B	+	A	G	0.0316669	273	0.561594	0.056598
3_19627637	AT3G52930	AT3G52930.1	AT3G52930	-	T	C	0.0149503	528	0.462846	0.0408427
3_20555299	AT3G55440	AT3G55440.1	CTIMC	+	A	G	0.028929	860	0.295105	0.0807215
3_21718840	AT3G58730	AT3G58730.1	VHA-D	-	T	C	0.0662124	379	0.648416	0.0073074
3_21718585	AT3G58730	AT3G58730.1	VHA-D	-	T	C	0.0107251	46	1.80579	0.0494254
3_21995906	AT3G59540	AT3G59540.1	RPL38B	-	T	C	0.0506307	590	0.934225	1.99204e-05
3_21995848	AT3G59540	AT3G59540.1	RPL38B	-	T	C	0.162898	1549	0.508198	0.000250832
3_21995863	AT3G59540	AT3G59540.1	RPL38B	-	T	C	0.270117	2709	0.354548	0.0204305
3_22354316	AT3G60500	AT3G60500.1,AT3G60500.3,AT3G60500.2,AT3G60500.4	CER7	+	A	G	0.0708333	28	-1.33774	0.0200488
3_23090604	AT3G62400	AT3G62400.2	AT3G62400	+	A	G	0.0369904	147	1.04377	0.00300993
3_23090490	AT3G62400	AT3G62400.2	AT3G62400	+	A	G	0.0156705	113	0.995659	0.0348343
3_23236092	AT3G62840	AT3G62840.1,AT3G62840.2	AT3G62840	-	T	C	0.0104862	17	-1.8424	0.00130078
3_23433641	AT3G63460	AT3G63460.1,AT3G63460.2,AT3G63460.3	SEC31B	-	T	C	0.153829	685	0.42216	0.0706997
4_1136967	AT4G02580	AT4G02580.1	AT4G02580	+	A	G	0.134406	468	0.386996	0.0985648
4_6409319	AT4G10340	AT4G10340.1	LHCB5	+	A	G	0.101108	117	-0.683332	0.0751574
4_6732834	AT4G11010	AT4G11010.1	NDPK3	-	T	C	0.0908939	1088	0.472322	0.000233108
4_6733298	AT4G11010	AT4G11010.1	NDPK3	-	T	C	0.0455997	557	0.503549	0.00194378
4_6733033	AT4G11010	AT4G11010.1	NDPK3	-	T	C	0.129039	1877	0.344476	0.0036194
4_6733232	AT4G11010	AT4G11010.1	NDPK3	-	T	C	0.0185791	267	0.664256	0.0366253
4_6733264	AT4G11010	AT4G11010.1	NDPK3	-	T	C	0.140515	1851	0.289124	0.0385792
4_6733227	AT4G11010	AT4G11010.1	NDPK3	-	T	C	0.32931	4611	0.288873	0.0779853
4_6733194	AT4G11010	AT4G11010.1	NDPK3	-	T	C	0.0208657	322	0.607038	0.0823207
4_6732811	AT4G11010	AT4G11010.1	NDPK3	-	T	C	0.0166223	181	0.71927	0.0954468
4_6801731	AT4G11150	AT4G11150.1	VHA-E1	+	A	G	0.00381378	29	2.37872	0.0802198
4_8549632	AT4G14960	AT4G14960.2,AT4G14960.1	TUBA6	-	T	C	0.0127077	257	0.580286	0.0772783
4_8550275	AT4G14960	AT4G14960.2,AT4G14960.1	TUBA6	-	T	C	0.00419972	54	1.41925	0.096915
4_8549153	AT4G14960	AT4G14960.2,AT4G14960.1	TUBA6	-	T	C	0.0157346	175	0.647786	0.0998833
4_8572063	AT4G15000	AT4G15000.2,AT4G15000.1	RPL27C	+	A	G	0.00181089	42	2.11417	0.0148493
4_9028524	AT4G15910	AT4G15910.1	ATDI21	+	A	G	0.037527	295	0.638482	0.0169761
4_10035806	AT4G18100	AT4G18100.1	RPL32A	-	T	C	0.0322398	684	0.513297	0.0128706
4_11266715	AT4G21105	AT4G21105.1,AT4G21105.3	AT4G21105	+	A	G	0.0742911	1027	0.505415	2.15378e-06
4_11266783	AT4G21105	AT4G21105.1,AT4G21105.3	AT4G21105	+	A	G	0.0147892	154	1.05015	0.00189228
4_11266799	AT4G21105	AT4G21105.1,AT4G21105.3	AT4G21105	+	A	G	0.291565	2755	0.311746	0.00257686
4_11266413	AT4G21105	AT4G21105.1,AT4G21105.3	AT4G21105	+	A	G	0.0238416	336	0.858388	0.00829069
4_11266724	AT4G21105	AT4G21105.1,AT4G21105.3	AT4G21105	+	A	G	0.100573	1369	0.360162	0.0112694
4_11266414	AT4G21105	AT4G21105.1,AT4G21105.3	AT4G21105	+	A	G	0.140668	1955	0.346636	0.0641137
4_11266717	AT4G21105	AT4G21105.1,AT4G21105.3	AT4G21105	+	A	G	0.00453288	59	1.14764	0.0734212
4_11920683	AT4G22670	AT4G22670.1	AtHip1	+	A	G	0.118046	261	0.729215	0.0135344
4_12249847	AT4G23470	AT4G23470.1,AT4G23470.2,AT4G23470.3,AT4G23470.4	AT4G23470	+	A	G	0.0757351	358	0.560513	0.0220239
4_13594277	AT4G27090	AT4G27090.1	RPL14B	-	T	C	0.0813413	1749	0.371752	0.00241545
4_13943971	AT4G28060	AT4G28060.1	COX6B-3	-	T	C	0.0151104	39	1.65853	0.078729
4_14673935	AT4G30010	AT4G30010.1	AT4G30010	+	A	G	0.0431198	387	0.724792	9.15081e-05
4_15669507	AT4G32470	AT4G32470.1,AT4G32470.2	QCR7-1	-	T	C	0.0385909	218	0.85757	0.00246675
4_15669668	AT4G32470	AT4G32470.1,AT4G32470.2	QCR7-1	-	T	C	0.0166262	274	0.619226	0.0226267
4_15669697	AT4G32470	AT4G32470.1,AT4G32470.2	QCR7-1	-	T	C	0.00322598	61	1.4008	0.0454378
4_15669533	AT4G32470	AT4G32470.1,AT4G32470.2	QCR7-1	-	T	C	0.0356785	249	0.589869	0.0789656
4_15693763	AT4G32530	AT4G32530.1,AT4G32530.2	VHA-c''1	-	T	C	0.225559	1059	0.324287	0.0147598
4_16067956	AT4G33360	AT4G33360.1,AT4G33360.2	FLDH	-	T	C	0.259172	657	0.441336	0.00578355
4_16337648	AT4G34110	AT4G34110.1	PAB2	+	A	G	0.0284925	268	0.823396	0.000435398
4_16339522	AT4G34110	AT4G34110.1	PAB2	+	A	G	0.00618648	98	0.97459	0.0891108
4_16484855	AT4G34490	AT4G34490.1,AT4G34490.2	CAP1	-	T	C	0.134491	333	0.624176	0.00612888
4_16484892	AT4G34490	AT4G34490.1,AT4G34490.2	CAP1	-	T	C	0.0205761	55	1.76162	0.0245703
4_16558591	AT4G34700	AT4G34700.1	CIB22	+	A	G	0.2218	2159	0.328892	5.15229e-06
4_16558370	AT4G34700	AT4G34700.1	CIB22	+	A	G	0.0292701	389	0.577236	0.00446345
4_16558612	AT4G34700	AT4G34700.1	CIB22	+	A	G	0.116455	1046	0.356611	0.00529268
4_16558578	AT4G34700	AT4G34700.1	CIB22	+	A	G	0.362363	3778	0.23239	0.0161758
4_16558584	AT4G34700	AT4G34700.1	CIB22	+	A	G	0.247167	2574	0.219689	0.0285833
4_16708918	AT4G35100	AT4G35100.2,AT4G35100.1	PIP2-7	+	A	G	0.00448864	65	1.32729	0.0727548
4_18012304	AT4G38510	AT4G38510.2,AT4G38510.3,AT4G38510.4,AT4G38510.5,AT4G38510.1	VHA-B2	-	T	C	0.219929	863	0.531728	2.83814e-06
4_18011294	AT4G38510	AT4G38510.2,AT4G38510.3,AT4G38510.4,AT4G38510.5,AT4G38510.1	VHA-B2	-	T	C	0.112099	731	0.533912	0.000115968
4_18012294	AT4G38510	AT4G38510.2,AT4G38510.3,AT4G38510.4,AT4G38510.5,AT4G38510.1	VHA-B2	-	T	C	0.0217164	83	1.55105	0.00291607
4_18011318	AT4G38510	AT4G38510.2,AT4G38510.3,AT4G38510.4,AT4G38510.5,AT4G38510.1	VHA-B2	-	T	C	0.277651	2071	0.314989	0.00963105
4_18011232	AT4G38510	AT4G38510.2,AT4G38510.3,AT4G38510.4,AT4G38510.5,AT4G38510.1	VHA-B2	-	T	C	0.0294229	156	0.797405	0.0436589
4_18011798	AT4G38510	AT4G38510.2,AT4G38510.3,AT4G38510.4,AT4G38510.5,AT4G38510.1	VHA-B2	-	T	C	0.0880503	350	0.57903	0.0515895
4_18013056	AT4G38510	AT4G38510.2,AT4G38510.3,AT4G38510.4,AT4G38510.5,AT4G38510.1	VHA-B2	-	T	C	0.0167969	86	1.13885	0.0522491
4_18011235	AT4G38510	AT4G38510.2,AT4G38510.3,AT4G38510.4,AT4G38510.5,AT4G38510.1	VHA-B2	-	T	C	0.0349136	204	0.761955	0.064228
4_18012293	AT4G38510	AT4G38510.2,AT4G38510.3,AT4G38510.4,AT4G38510.5,AT4G38510.1	VHA-B2	-	T	C	0.257393	940	0.330214	0.0828283
4_18149001	AT4G38920	AT4G38920.1,AT4G38920.2	VHA-C3	+	A	G	0.111438	948	0.59938	5.65839e-08
4_18148741	AT4G38920	AT4G38920.1,AT4G38920.2	VHA-C3	+	A	G	0.0867382	1641	0.459502	3.78802e-07
4_18149021	AT4G38920	AT4G38920.1,AT4G38920.2	VHA-C3	+	A	G	0.0378371	282	0.904776	0.000435398
4_18149022	AT4G38920	AT4G38920.1,AT4G38920.2	VHA-C3	+	A	G	0.0114079	82	1.57998	0.000983789
4_18148330	AT4G38920	AT4G38920.1,AT4G38920.2	VHA-C3	+	A	G	0.0287958	528	0.515946	0.00192729
4_18149004	AT4G38920	AT4G38920.1,AT4G38920.2	VHA-C3	+	A	G	0.1836	1536	0.327237	0.00973226
4_18149023	AT4G38920	AT4G38920.1,AT4G38920.2	VHA-C3	+	A	G	0.0165193	127	1.04925	0.0260068
4_18149002	AT4G38920	AT4G38920.1,AT4G38920.2	VHA-C3	+	A	G	0.0095518	78	1.22722	0.0365707
4_18148858	AT4G38920	AT4G38920.1,AT4G38920.2	VHA-C3	+	A	G	0.0281679	351	0.488829	0.0827577
5_554194	AT5G02500	AT5G02500.1,AT5G02500.2	MED37E	-	T	C	0.00599006	176	0.996955	0.00217004
5_554311	AT5G02500	AT5G02500.1,AT5G02500.2	MED37E	-	T	C	0.00903562	257	0.592318	0.078729
5_588309	AT5G02610	AT5G02610.1,AT5G02610.2	RPL35D	+	A	G	0.0495101	294	-0.458569	0.0712565
5_1591014	AT5G05370	AT5G05370.1	AT5G05370	-	T	C	0.0181836	182	0.929929	0.0040183
5_2819245	AT5G08670	AT5G08670.1	AT5G08670	-	T	C	0.0232966	332	0.673048	0.00849153
5_3685521	AT5G11520	AT5G11520.1	ASP3	-	T	C	0.0144642	66	1.35387	0.0827577
5_3791276	AT5G11770	AT5G11770.1	AT5G11770	-	T	C	0.0818672	1382	0.293114	0.078729
5_3791152	AT5G11770	AT5G11770.1	AT5G11770	-	T	C	0.0142264	161	0.760446	0.0921568
5_4530817	AT5G14040	AT5G14040.1	MPT3	-	T	C	0.0410959	150	1.20309	0.000919734
5_4530975	AT5G14040	AT5G14040.1	MPT3	-	T	C	0.0588714	506	0.513521	0.00932564
5_4531838	AT5G14040	AT5G14040.1	MPT3	-	T	C	0.0230287	290	0.607697	0.045422
5_4890364	AT5G15090	AT5G15090.1,AT5G15090.2	VDAC3	-	T	C	0.0071462	61	1.30844	0.099525
5_4978834	AT5G15320	AT5G15320.1,AT5G15320.2	AT5G15320	+	A	G	0.190247	277	0.783536	0.000388668
5_4978723	AT5G15320	AT5G15320.1,AT5G15320.2	AT5G15320	+	A	G	0.0214026	112	0.981321	0.0438172
5_4978845	AT5G15320	AT5G15320.1,AT5G15320.2	AT5G15320	+	A	G	0.0466278	56	1.38589	0.0776396
5_5511059	AT5G16760	AT5G16760.1	ITPK1	+	A	G	0.074928	26	2.75899	0.0406395
5_5714733	AT5G17330	AT5G17330.1	GAD1	+	A	G	0.0189421	183	0.980907	0.00109281
5_6679424	AT5G19760	AT5G19760.1	DTC	-	T	C	0.0666168	89	1.09585	0.0712565
5_6764142	AT5G20020	AT5G20020.1	RAN2	+	A	G	0.0461169	518	-0.368712	0.0177747
5_6764149	AT5G20020	AT5G20020.1	RAN2	+	A	G	0.07044	817	-0.278603	0.0719046
5_7015059	AT5G20720	AT5G20720.1,AT5G20720.2,AT5G20720.3,AT5G20720.4	CPN21	+	A	G	0.0574895	344	-0.439622	0.0210547
5_8008183	AT5G23740	AT5G23740.1	RPS11C	-	T	C	0.0372933	97	0.980077	0.0761797
5_9668464	AT5G27380	AT5G27380.1	GSH2	-	T	C	0.168301	412	0.478888	0.0204305
5_9668470	AT5G27380	AT5G27380.1	GSH2	-	T	C	0.202243	487	0.440578	0.0247584
5_9668083	AT5G27380	AT5G27380.1	GSH2	-	T	C	0.0537125	34	2.06928	0.0767958
5_9874290	AT5G27850	AT5G27850.2,AT5G27850.1	RPL18C	+	A	G	0.0646808	621	0.62989	0.0017962
5_9873648	AT5G27850	AT5G27850.2,AT5G27850.1	RPL18C	+	A	G	0.0229972	457	0.452041	0.0630743
5_12077811	AT5G32440	AT5G32440.1,AT5G32440.3,AT5G32440.2	AT5G32440	+	A	G	0.0475947	93	1.06902	0.0629923
5_13109825	AT5G34850	AT5G34850.1	PAP26	-	T	C	0.0598619	607	0.462277	0.00257818
5_13108739	AT5G34850	AT5G34850.1	PAP26	-	T	C	0.114626	1058	0.43992	0.00391333
5_13109478	AT5G34850	AT5G34850.1	PAP26	-	T	C	0.0919511	714	0.469697	0.00578072
5_14276083	AT5G36230	AT5G36230.1,AT5G36230.2	AT5G36230	+	A	G	0.116369	632	0.417873	0.0828283
5_14900234	AT5G37510	AT5G37510.1,AT5G37510.2	EMB1467	+	A	G	0.126718	544	0.435205	0.0191525
5_19292839	AT5G47570	AT5G47570.1	AT5G47570	-	T	C	0.230586	1357	0.406065	0.00132791
5_19292834	AT5G47570	AT5G47570.1	AT5G47570	-	T	C	0.0877991	521	0.47322	0.0114037
5_19292878	AT5G47570	AT5G47570.1	AT5G47570	-	T	C	0.0108049	89	1.03555	0.0574937
5_19292840	AT5G47570	AT5G47570.1	AT5G47570	-	T	C	0.00395121	23	2.60156	0.0897776
5_19390357	AT5G47890	AT5G47890.1	AT5G47890	+	A	G	0.138318	1332	0.44063	0.000281059
5_19390402	AT5G47890	AT5G47890.1	AT5G47890	+	A	G	0.274243	2039	0.318628	0.00434146
5_19390378	AT5G47890	AT5G47890.1	AT5G47890	+	A	G	0.027996	253	0.737309	0.0266868
5_19390394	AT5G47890	AT5G47890.1	AT5G47890	+	A	G	0.289214	2349	0.282056	0.052689
5_20288297	AT5G49890	AT5G49890.1	CLC-C	-	T	C	0.158025	64	1.38293	0.0452582
5_20950120	AT5G51570	AT5G51570.1	HIR4	+	A	G	0.0165687	31	2.49223	0.0420812
5_21355749	AT5G52650	AT5G52650.1	RPS10C	-	T	C	0.00336651	23	3.11682	0.0453867
5_22350514	AT5G55070	AT5G55070.1	AT5G55070	+	A	G	0.153043	337	0.654651	0.0780594
5_22820475	AT5G56350	AT5G56350.1	AT5G56350	-	T	C	0.0708142	354	0.563491	0.0196445
5_23515870	AT5G58110	AT5G58110.1	AT5G58110	+	A	G	0.0627138	275	0.59327	0.046017
5_23580016	AT5G58330	AT5G58330.1,AT5G58330.2,AT5G58330.3	AT5G58330	-	T	C	0.0721421	32	-1.17373	0.0459743
5_23725994	AT5G58740	AT5G58740.1	AT5G58740	-	T	C	0.0234031	85	1.35744	0.0173454
5_24015610	AT5G59613	AT5G59613.2,AT5G59613.1	AT5G59613	-	T	C	0.0779628	796	0.490459	0.00282992
5_24015629	AT5G59613	AT5G59613.2,AT5G59613.1	AT5G59613	-	T	C	0.0194805	246	0.609485	0.0713595
5_24290455	AT5G60390	AT5G60390.1,AT5G60390.3,AT5G60390.2	A3	+	A	G	0.00314961	114	1.23225	0.0061437
5_24290352	AT5G60390	AT5G60390.1,AT5G60390.3,AT5G60390.2	A3	+	A	G	0.00182341	71	1.30174	0.039935
5_25734729	AT5G64350	AT5G64350.1	FKBP12	-	T	C	0.00953924	53	1.88884	0.00923513
5_25734790	AT5G64350	AT5G64350.1	FKBP12	-	T	C	0.0355547	390	0.493241	0.0304522
5_26549805	AT5G66510	AT5G66510.1,AT5G66510.2	GAMMACA3	-	T	C	0.118124	131	0.823245	0.0889125
5_26959352	AT5G67590	AT5G67590.1	FRO1	+	A	G	0.151486	780	0.384852	0.0120187
5_26959409	AT5G67590	AT5G67590.1	FRO1	+	A	G	0.0421105	170	0.829677	0.0194646

## Sheet: GENES ECT2 roots
GENE	NAME	STRAND	TRANSCRIPTS	TPM	HITS	IDs	PROP	log2FC	p-adj	MISMATCH TYPE
AT1G04480	RPL23C	+	AT1G04480.1	770.09349	2	1_1216452,1_1216367	0.0314,0.0208	-0.512,-0.423	0.000939,0.0756	A:G,A:G
AT1G08830	CSD1	+	AT1G08830.1,AT1G08830.2	247.21797475,0.18873075	1	1_2828782	0.0503	0.695	0.0551	A:G
AT1G09780	PGM1	-	AT1G09780.1	345.9476205	1	1_3166919	0.032	0.801	0.000178	T:C
AT1G12840	VHA-C	+	AT1G12840.1	109.51659025	1	1_4375840	0.112	0.449	0.0398	A:G
AT1G16700	AT1G16700	+	AT1G16700.1	173.11396125	1	1_5711825	0.291	0.404	0.092	A:G
AT1G22300	GRF10	-	AT1G22300.1,AT1G22300.2,AT1G22300.3	293.300658,122.56122825,2.78105025	2	1_7878976,1_7879274	0.0685,0.0512	0.72,0.615	0.00354,0.0286	T:C,T:C
AT1G27450	APT1	+	AT1G27450.4,AT1G27450.1,AT1G27450.2,AT1G27450.3	440.792271,34.26892775,2.68291025,1.880519	3	1_9533929,1_9533931,1_9533930	0.138,0.06,0.0575	0.799,1.09,1.11	7.06e-08,0.000202,0.000337	A:G,A:G,A:G
AT1G27970	NTF2	+	AT1G27970.1,AT1G27970.2	154.3986285,15.39301925	1	1_9747221	0.005	2.86	0.0243	A:G
AT1G29900	CARB	+	AT1G29900.1	49.50051775	1	1_10472983	0.13	-2.02	0.0571	A:G
AT1G30580	AT1G30580	-	AT1G30580.1	257.92084475	2	1_10831808,1_10832040	0.269,0.00697	0.547,1.36	0.011,0.0999	T:C,T:C
AT1G47260	GAMMACA2	-	AT1G47260.1	118.6350665	2	1_17321277,1_17321398	0.114,0.0748	0.704,0.459	0.00984,0.0753	T:C,T:C
AT1G50010	TUBA4	+	AT1G50010.1	437.858038	3	1_18518500,1_18518414,1_18518317	0.0244,0.0046,0.00823	0.677,1.54,1.07	0.0142,0.0269,0.0302	A:G,A:G,A:G
AT1G50920	AT1G50920	+	AT1G50920.1	96.785516	1	1_18871460	0.0687	0.991	0.0198	A:G
AT1G51650	AT1G51650	+	AT1G51650.1	1016.486815	2	1_19153678,1_19153780	0.0271,0.0341	0.613,0.545	0.000403,0.0524	A:G,A:G
AT1G51690	PP2AB1	+	AT1G51690.2,AT1G51690.5,AT1G51690.1,AT1G51690.4,AT1G51690.3	28.84397425,7.8894915,0.11609775,0.034318,0	2	1_19170253,1_19170257	0.221,0.0587	1.12,2.92	0.0263,0.0981	A:G,A:G
AT1G51710	UBP6	-	AT1G51710.1,AT1G51710.2	74.69504125,1.97764725	1	1_19176194	0.0237	1.48	0.0852	T:C
AT1G52070	JAL10	-	AT1G52070.1,AT1G52070.2	586.00707525,1.1893725	1	1_19366056	0.00234	1.92	0.0803	T:C
AT1G53240	mMDH1	-	AT1G53240.1	513.25460525	2	1_19854827,1_19854861	0.0131,0.122	2.81,0.519	1.13e-07,0.000592	T:C,T:C
AT1G54220	AT1G54220	-	AT1G54220.1,AT1G54220.2	17.44660575,0.229307	1	1_20246617	0.288	0.811	0.0103	T:C
AT1G65220	AT1G65220	+	AT1G65220.1	104.27363425	1	1_24228790	0.115	0.782	0.00665	A:G
AT1G67350	AT1G67350	+	AT1G67350.1,AT1G67350.2	306.236673,50.6302985	2	1_25236051,1_25236609	0.0648,0.0491	0.382,0.44	0.00849,0.0513	A:G,A:G
AT1G68310	AE7	+	AT1G68310.2,AT1G68310.1	30.549415,8.7938525	1	1_25600631	0.0198	3.04	0.0913	A:G
AT1G72020	AT1G72020	-	AT1G72020.1	590.42745375	1	1_27109454	0.0382	0.62	0.0122	T:C
AT1G76200	AT1G76200	+	AT1G76200.1	737.2946785	5	1_28594513,1_28594553,1_28594580,1_28594648,1_28594560	0.189,0.0365,0.0317,0.00716,0.161	0.345,0.581,0.608,2.28,0.327	0.00456,0.0185,0.0686,0.0768,0.0879	A:G,A:G,A:G,A:G,A:G
AT1G76850	SEC5A	+	AT1G76850.1	31.42291325	1	1_28853487	0.0493	2.4	0.0686	A:G
AT1G77940	RPL30B	-	AT1G77940.1	1043.10986875	1	1_29304014	0.0326	1.28	0.0175	T:C
AT1G78040	AT1G78040	+	AT1G78040.2,AT1G78040.3,AT1G78040.1	562.7253585,386.54340675,0.46229675	1	1_29346524	0.0237	0.409	0.0339	A:G
AT1G79530	GAPCP1	-	AT1G79530.1	306.45433025	1	1_29916440	0.012	0.974	0.0631	T:C
AT1G79550	PGK	-	AT1G79550.2,AT1G79550.1	744.4868625,38.32817075	1	1_29925248	0.00131	2.67	0.0606	T:C
AT2G02050	AT2G02050	+	AT2G02050.1	260.10509675	1	2_490202	0.0353	0.715	0.0196	A:G
AT2G02510	AT2G02510	+	AT2G02510.1	255.41041675	3	2_674549,2_674529,2_673523	0.295,0.13,0.0107	0.326,0.486,1.29	0.0316,0.0356,0.0424	A:G,A:G,A:G
AT2G17130	IDH2	-	AT2G17130.1,AT2G17130.2	93.432135,20.1831125	1	2_7461074	0.0337	0.971	0.0546	T:C
AT2G18040	PIN1	+	AT2G18040.1	188.74559725	1	2_7843681	0.02	1.33	0.0694	A:G
AT2G20420	AT2G20420	+	AT2G20420.1	239.348456	1	2_8806422	0.00979	1.38	0.0123	A:G
AT2G21870	MGP1	-	AT2G21870.1,AT2G21870.2	687.25025625,0.110084	1	2_9320281	0.161	0.496	0.00165	T:C
AT2G25610	VHA-c''2	-	AT2G25610.1,AT2G25610.2	89.704886,0.17339825	1	2_10902263	0.069	0.748	7.84e-05	T:C
AT2G31490	AT2G31490	+	AT2G31490.1	645.34743525	1	2_13412088	0.0427	0.669	0.00451	A:G
AT2G33040	ATPC	-	AT2G33040.1	662.2965265	2	2_14019104,2_14019322	0.0024,0.00627	1.95,1.2	0.0366,0.0641	T:C,T:C
AT2G33150	PED1	-	AT2G33150.1	251.47233425	1	2_14047801	0.0324	0.841	0.0191	T:C
AT2G35120	GDH2	-	AT2G35120.1	488.818733	1	2_14805799	0.0254	1.4	0.00936	T:C
AT2G36530	ENO2	-	AT2G36530.1,AT2G36530.2	1538.59548125,0.1561	1	2_15322966	0.00271	1.16	0.01	T:C
AT2G37250	ADK	+	AT2G37250.1	125.68539475	1	2_15642912	0.00466	2.97	0.0898	A:G
AT2G39780	RNS2	+	AT2G39780.1,AT2G39780.2	125.779537,0	1	2_16593579	0.0305	2.18	0.0129	A:G
AT2G41740	VLN2	-	AT2G41740.1,AT2G41740.2	48.84884275,0.46854475	1	2_17412942	0.032	1.68	0.017	T:C
AT2G42490	AT2G42490	-	AT2G42490.1	116.27730925	1	2_17695339	0.0501	0.862	0.0784	T:C
AT2G43460	RPL38B	-	AT2G43460.1	1362.0781045	1	2_18046112	0.0231	1.46	0.0828	T:C
AT2G44120	RPL7C	-	AT2G44120.1,AT2G44120.2	262.740564,3.88753075	1	2_18249222	0.0999	0.493	0.0823	T:C
AT3G01390	VHA-G1	-	AT3G01390.1,AT3G01390.2,AT3G01390.3,AT3G01390.4	243.82724775,1.49689375,0.62542825,0.01968275	1	3_150224	0.021	1.17	0.0458	T:C
AT3G05530	RPT5A	+	AT3G05530.1	158.30993025	1	3_1606094	0.321	0.964	0.0111	A:G
AT3G06355		+	AT3G06355.1	NA	1	3_14200076	0.0434	-1.13	0.0129	A:G
AT3G07480	AT3G07480	+	AT3G07480.1	414.46772175	1	3_2389457	0.139	0.294	0.0391	A:G
AT3G08610	AT3G08610	-	AT3G08610.1	562.87344225	7	3_2615653,3_2616426,3_2616521,3_2615654,3_2615634,3_2616668,3_2616488	0.0683,0.0392,0.0113,0.0499,0.0397,0.0765,0.408	0.581,0.559,1.16,0.569,0.583,0.367,0.269	0.000191,0.000722,0.00219,0.00453,0.0129,0.0237,0.0311	T:C,T:C,T:C,T:C,T:C,T:C,T:C
AT3G10860	AT3G10860	+	AT3G10860.1,AT3G10860.2	1024.48779625,0.4262675	6	3_3400492,3_3400483,3_3399912,3_3400501,3_3400495,3_3400526	0.0396,0.156,0.0456,0.0179,0.129,0.0407	0.376,0.244,0.41,0.602,0.303,0.364	0.00362,0.00825,0.0102,0.0344,0.0376,0.049	A:G,A:G,A:G,A:G,A:G,A:G
AT3G12600	NUDT16	+	AT3G12600.1,AT3G12600.2	72.97333675,28.915477	1	3_4004846	0.107	0.675	0.00488	A:G
AT3G13930	AT3G13930	+	AT3G13930.1	189.4378775	1	3_4598184	0.0383	0.618	0.0617	A:G
AT3G14600	RPL18AC	+	AT3G14600.1	385.393104	1	3_4911845	0.00355	2.73	0.0534	A:G
AT3G15640	COX5B-1	+	AT3G15640.1,AT3G15640.2	192.05624275,13.77110475	2	3_5301350,3_5301529	0.0447,0.0858	0.656,0.694	0.028,0.0589	A:G,A:G
AT3G16460	JAL34	+	AT3G16460.1,AT3G16460.2	1657.74058375,28.91117925	1	3_5593418	0.00584	0.937	0.017	A:G
AT3G18820	RABG3F	+	AT3G18820.1	185.40851875	1	3_6485809	0.0401	0.888	0.00247	A:G
AT3G19820	DIM	-	AT3G19820.2,AT3G19820.1,AT3G19820.3	348.21452175,1.630757,1.10958525	1	3_6880528	0.0694	0.586	6.9e-06	T:C
AT3G22850	AT3G22850	+	AT3G22850.1	337.43739975	1	3_8090423	0.0588	1.16	0.0221	A:G
AT3G23600	AT3G23600	+	AT3G23600.1,AT3G23600.2	557.34270175,8.12528425	3	3_8475061,3_8475395,3_8475521	0.0181,0.0108,0.0837	0.763,0.817,0.316	0.000113,0.00709,0.0192	A:G,A:G,A:G
AT3G27240	CYC11	-	AT3G27240.1	301.710097	3	3_10055997,3_10055983,3_10055984	0.0875,0.0729,0.0184	0.724,0.728,1.58	0.0016,0.0232,0.0483	T:C,T:C,T:C
AT3G28710	VHA-D1	-	AT3G28710.1	147.65457975	1	3_10773232	0.00733	2.65	0.0475	T:C
AT3G41762	AT3G41762	-	AT3G41762.1	1.84700925	1	3_14197251	0.277	0.534	9.12e-07	T:C
AT3G42050	VHA-H	-	AT3G42050.1	287.69111025	5	3_14229915,3_14228705,3_14231873,3_14228913,3_14228650	0.0574,0.0449,0.0598,0.00821,0.258	0.7,0.906,0.495,1.3,0.41	0.000178,0.00152,0.00963,0.0222,0.0491	T:C,T:C,T:C,T:C,T:C
AT3G43810	CAM7	-	AT3G43810.1,AT3G43810.3,AT3G43810.4	304.01340075,0.8946355,0.2568235	2	3_15664531,3_15664537	0.0132,0.0276	2.04,0.818	0.000259,0.0725	T:C,T:C
AT3G44010	RPS29A	-	AT3G44010.2,AT3G44010.1	881.74103825,0.46860625	1	3_15800027	0.0269	1.38	0.0129	T:C
AT3G47833	SDH7A	+	AT3G47833.1	111.908277	1	3_17649799	0.0055	3.09	0.0574	A:G
AT3G48560	ALS	-	AT3G48560.1	123.9783185	1	3_18002357	0.00754	2.56	0.0779	T:C
AT3G52090	NRPB11	-	AT3G52090.1,AT3G52090.2	152.51843075,0.1150515	1	3_19318088	0.0069	2.83	0.0993	T:C
AT3G52200	LTA3	+	AT3G52200.1,AT3G52200.2	94.61513225,0.11652025	1	3_19365907	0.0146	2.13	0.0184	A:G
AT3G52590	RPL40B	+	AT3G52590.1	961.55008025	1	3_19506699	0.0317	0.562	0.0566	A:G
AT3G52930	AT3G52930	-	AT3G52930.1	1238.181266	1	3_19627637	0.015	0.463	0.0408	T:C
AT3G55440	CTIMC	+	AT3G55440.1	1018.36121975	1	3_20555299	0.0289	0.295	0.0807	A:G
AT3G58730	VHA-D	-	AT3G58730.1	174.3474445	2	3_21718840,3_21718585	0.0662,0.0107	0.648,1.81	0.00731,0.0494	T:C,T:C
AT3G59540	RPL38B	-	AT3G59540.1	737.5761965	3	3_21995906,3_21995848,3_21995863	0.0506,0.163,0.27	0.934,0.508,0.355	1.99e-05,0.000251,0.0204	T:C,T:C,T:C
AT3G60500	CER7	+	AT3G60500.1,AT3G60500.3,AT3G60500.2,AT3G60500.4	14.6888845,3.7944165,3.7807345,2.92038675	1	3_22354316	0.0708	-1.34	0.02	A:G
AT3G62400	AT3G62400	+	AT3G62400.2	353.218455	2	3_23090604,3_23090490	0.037,0.0157	1.04,0.996	0.00301,0.0348	A:G,A:G
AT3G62840	AT3G62840	-	AT3G62840.1,AT3G62840.2	149.8208575,64.59410575	1	3_23236092	0.0105	-1.84	0.0013	T:C
AT3G63460	SEC31B	-	AT3G63460.1,AT3G63460.2,AT3G63460.3	84.88959125,13.65717575,0.02321625	1	3_23433641	0.154	0.422	0.0707	T:C
AT4G02580	AT4G02580	+	AT4G02580.1	230.43606775	1	4_1136967	0.134	0.387	0.0986	A:G
AT4G10340	LHCB5	+	AT4G10340.1	75.1329455	1	4_6409319	0.101	-0.683	0.0752	A:G
AT4G11010	NDPK3	-	AT4G11010.1	458.43640275	8	4_6732834,4_6733298,4_6733033,4_6733232,4_6733264,4_6733227,4_6733194,4_6732811	0.0909,0.0456,0.129,0.0186,0.141,0.329,0.0209,0.0166	0.472,0.504,0.344,0.664,0.289,0.289,0.607,0.719	0.000233,0.00194,0.00362,0.0366,0.0386,0.078,0.0823,0.0954	T:C,T:C,T:C,T:C,T:C,T:C,T:C,T:C
AT4G11150	VHA-E1	+	AT4G11150.1	731.86665275	1	4_6801731	0.00381	2.38	0.0802	A:G
AT4G14960	TUBA6	-	AT4G14960.2,AT4G14960.1	629.40630975,1.7382595	3	4_8549632,4_8550275,4_8549153	0.0127,0.0042,0.0157	0.58,1.42,0.648	0.0773,0.0969,0.0999	T:C,T:C,T:C
AT4G15000	RPL27C	+	AT4G15000.2,AT4G15000.1	1850.8855055,515.02648025	1	4_8572063	0.00181	2.11	0.0148	A:G
AT4G15910	ATDI21	+	AT4G15910.1	493.39124625	1	4_9028524	0.0375	0.638	0.017	A:G
AT4G18100	RPL32A	-	AT4G18100.1	1498.7677405	1	4_10035806	0.0322	0.513	0.0129	T:C
AT4G21105	AT4G21105	+	AT4G21105.1,AT4G21105.3	438.06216275,0.535247	7	4_11266715,4_11266783,4_11266799,4_11266413,4_11266724,4_11266414,4_11266717	0.0743,0.0148,0.292,0.0238,0.101,0.141,0.00453	0.505,1.05,0.312,0.858,0.36,0.347,1.15	2.15e-06,0.00189,0.00258,0.00829,0.0113,0.0641,0.0734	A:G,A:G,A:G,A:G,A:G,A:G,A:G
AT4G22670	AtHip1	+	AT4G22670.1	148.6509595	1	4_11920683	0.118	0.729	0.0135	A:G
AT4G23470	AT4G23470	+	AT4G23470.1,AT4G23470.2,AT4G23470.3,AT4G23470.4	140.683217,2.14986725,0.03386975,0	1	4_12249847	0.0757	0.561	0.022	A:G
AT4G27090	RPL14B	-	AT4G27090.1	2553.14789175	1	4_13594277	0.0813	0.372	0.00242	T:C
AT4G28060	COX6B-3	-	AT4G28060.1	282.44809375	1	4_13943971	0.0151	1.66	0.0787	T:C
AT4G30010	AT4G30010	+	AT4G30010.1	575.138613	1	4_14673935	0.0431	0.725	9.15e-05	A:G
AT4G32470	QCR7-1	-	AT4G32470.1,AT4G32470.2	513.43079725,0	4	4_15669507,4_15669668,4_15669697,4_15669533	0.0386,0.0166,0.00323,0.0357	0.858,0.619,1.4,0.59	0.00247,0.0226,0.0454,0.079	T:C,T:C,T:C,T:C
AT4G32530	VHA-c''1	-	AT4G32530.1,AT4G32530.2	133.9577285,3.81500225	1	4_15693763	0.226	0.324	0.0148	T:C
AT4G33360	FLDH	-	AT4G33360.1,AT4G33360.2	156.11707025,0.728649	1	4_16067956	0.259	0.441	0.00578	T:C
AT4G34110	PAB2	+	AT4G34110.1	454.14964625	2	4_16337648,4_16339522	0.0285,0.00619	0.823,0.975	0.000435,0.0891	A:G,A:G
AT4G34490	CAP1	-	AT4G34490.1,AT4G34490.2	86.38014925,0.19569575	2	4_16484855,4_16484892	0.134,0.0206	0.624,1.76	0.00613,0.0246	T:C,T:C
AT4G34700	CIB22	+	AT4G34700.1	856.73517825	5	4_16558591,4_16558370,4_16558612,4_16558578,4_16558584	0.222,0.0293,0.116,0.362,0.247	0.329,0.577,0.357,0.232,0.22	5.15e-06,0.00446,0.00529,0.0162,0.0286	A:G,A:G,A:G,A:G,A:G
AT4G35100	PIP2-7	+	AT4G35100.2,AT4G35100.1	452.571598,158.59860875	1	4_16708918	0.00449	1.33	0.0728	A:G
AT4G38510	VHA-B2	-	AT4G38510.2,AT4G38510.3,AT4G38510.4,AT4G38510.5,AT4G38510.1	77.5422995,60.14213225,33.118681,3.4616785,0.28279675	9	4_18012304,4_18011294,4_18012294,4_18011318,4_18011232,4_18011798,4_18013056,4_18011235,4_18012293	0.22,0.112,0.0217,0.278,0.0294,0.0881,0.0168,0.0349,0.257	0.532,0.534,1.55,0.315,0.797,0.579,1.14,0.762,0.33	2.84e-06,0.000116,0.00292,0.00963,0.0437,0.0516,0.0522,0.0642,0.0828	T:C,T:C,T:C,T:C,T:C,T:C,T:C,T:C,T:C
AT4G38920	VHA-C3	+	AT4G38920.1,AT4G38920.2	568.17412375,1.03406275	9	4_18149001,4_18148741,4_18149021,4_18149022,4_18148330,4_18149004,4_18149023,4_18149002,4_18148858	0.111,0.0867,0.0378,0.0114,0.0288,0.184,0.0165,0.00955,0.0282	0.599,0.46,0.905,1.58,0.516,0.327,1.05,1.23,0.489	5.66e-08,3.79e-07,0.000435,0.000984,0.00193,0.00973,0.026,0.0366,0.0828	A:G,A:G,A:G,A:G,A:G,A:G,A:G,A:G,A:G
AT5G02500	MED37E	-	AT5G02500.1,AT5G02500.2	1491.2097885,0.30707175	2	5_554194,5_554311	0.00599,0.00904	0.997,0.592	0.00217,0.0787	T:C,T:C
AT5G02610	RPL35D	+	AT5G02610.1,AT5G02610.2	360.63901275,0.03794925	1	5_588309	0.0495	-0.459	0.0713	A:G
AT5G05370	AT5G05370	-	AT5G05370.1	628.7082145	1	5_1591014	0.0182	0.93	0.00402	T:C
AT5G08670	AT5G08670	-	AT5G08670.1	647.4586395	1	5_2819245	0.0233	0.673	0.00849	T:C
AT5G11520	ASP3	-	AT5G11520.1	161.99605575	1	5_3685521	0.0145	1.35	0.0828	T:C
AT5G11770	AT5G11770	-	AT5G11770.1	484.86721625	2	5_3791276,5_3791152	0.0819,0.0142	0.293,0.76	0.0787,0.0922	T:C,T:C
AT5G14040	MPT3	-	AT5G14040.1	661.594966	3	5_4530817,5_4530975,5_4531838	0.0411,0.0589,0.023	1.2,0.514,0.608	0.00092,0.00933,0.0454	T:C,T:C,T:C
AT5G15090	VDAC3	-	AT5G15090.1,AT5G15090.2	276.31122375,0.154603	1	5_4890364	0.00715	1.31	0.0995	T:C
AT5G15320	AT5G15320	+	AT5G15320.1,AT5G15320.2	207.32951575,0.566856	3	5_4978834,5_4978723,5_4978845	0.19,0.0214,0.0466	0.784,0.981,1.39	0.000389,0.0438,0.0776	A:G,A:G,A:G
AT5G16760	ITPK1	+	AT5G16760.1	52.92777825	1	5_5511059	0.0749	2.76	0.0406	A:G
AT5G17330	GAD1	+	AT5G17330.1	377.45356375	1	5_5714733	0.0189	0.981	0.00109	A:G
AT5G19760	DTC	-	AT5G19760.1	520.6864335	1	5_6679424	0.0666	1.1	0.0713	T:C
AT5G20020	RAN2	+	AT5G20020.1	480.1078325	2	5_6764142,5_6764149	0.0461,0.0704	-0.369,-0.279	0.0178,0.0719	A:G,A:G
AT5G20720	CPN21	+	AT5G20720.1,AT5G20720.2,AT5G20720.3,AT5G20720.4	380.5225825,8.9929985,5.02086375,0.700634	1	5_7015059	0.0575	-0.44	0.0211	A:G
AT5G23740	RPS11C	-	AT5G23740.1	415.10017675	1	5_8008183	0.0373	0.98	0.0762	T:C
AT5G27380	GSH2	-	AT5G27380.1	58.24509075	3	5_9668464,5_9668470,5_9668083	0.168,0.202,0.0537	0.479,0.441,2.07	0.0204,0.0248,0.0768	T:C,T:C,T:C
AT5G27850	RPL18C	+	AT5G27850.2,AT5G27850.1	734.035568,166.49674575	2	5_9874290,5_9873648	0.0647,0.023	0.63,0.452	0.0018,0.0631	A:G,A:G
AT5G32440	AT5G32440	+	AT5G32440.1,AT5G32440.3,AT5G32440.2	71.4714325,5.05094225,1.70572475	1	5_12077811	0.0476	1.07	0.063	A:G
AT5G34850	PAP26	-	AT5G34850.1	197.15201625	3	5_13109825,5_13108739,5_13109478	0.0599,0.115,0.092	0.462,0.44,0.47	0.00258,0.00391,0.00578	T:C,T:C,T:C
AT5G36230	AT5G36230	+	AT5G36230.1,AT5G36230.2	160.16785375,0.61127275	1	5_14276083	0.116	0.418	0.0828	A:G
AT5G37510	EMB1467	+	AT5G37510.1,AT5G37510.2	201.506192,4.15087125	1	5_14900234	0.127	0.435	0.0192	A:G
AT5G47570	AT5G47570	-	AT5G47570.1	472.13590725	4	5_19292839,5_19292834,5_19292878,5_19292840	0.231,0.0878,0.0108,0.00395	0.406,0.473,1.04,2.6	0.00133,0.0114,0.0575,0.0898	T:C,T:C,T:C,T:C
AT5G47890	AT5G47890	+	AT5G47890.1	266.8385695	4	5_19390357,5_19390402,5_19390378,5_19390394	0.138,0.274,0.028,0.289	0.441,0.319,0.737,0.282	0.000281,0.00434,0.0267,0.0527	A:G,A:G,A:G,A:G
AT5G49890	CLC-C	-	AT5G49890.1	19.35315925	1	5_20288297	0.158	1.38	0.0453	T:C
AT5G51570	HIR4	+	AT5G51570.1	61.346288	1	5_20950120	0.0166	2.49	0.0421	A:G
AT5G52650	RPS10C	-	AT5G52650.1	368.396134	1	5_21355749	0.00337	3.12	0.0454	T:C
AT5G55070	AT5G55070	+	AT5G55070.1	131.79321125	1	5_22350514	0.153	0.655	0.0781	A:G
AT5G56350	AT5G56350	-	AT5G56350.1	151.825909	1	5_22820475	0.0708	0.563	0.0196	T:C
AT5G58110	AT5G58110	+	AT5G58110.1	178.368121	1	5_23515870	0.0627	0.593	0.046	A:G
AT5G58330	AT5G58330	-	AT5G58330.1,AT5G58330.2,AT5G58330.3	23.967038,7.3389565,0	1	5_23580016	0.0721	-1.17	0.046	T:C
AT5G58740	AT5G58740	-	AT5G58740.1	219.03269675	1	5_23725994	0.0234	1.36	0.0173	T:C
AT5G59613	AT5G59613	-	AT5G59613.2,AT5G59613.1	1052.25816125,4.04008475	2	5_24015610,5_24015629	0.078,0.0195	0.49,0.609	0.00283,0.0714	T:C,T:C
AT5G60390	A3	+	AT5G60390.1,AT5G60390.3,AT5G60390.2	1699.9702495,1359.161468,1.09179825	2	5_24290455,5_24290352	0.00315,0.00182	1.23,1.3	0.00614,0.0399	A:G,A:G
AT5G64350	FKBP12	-	AT5G64350.1	1178.7660435	2	5_25734729,5_25734790	0.00954,0.0356	1.89,0.493	0.00924,0.0305	T:C,T:C
AT5G66510	GAMMACA3	-	AT5G66510.1,AT5G66510.2	184.27755925,0.4515615	1	5_26549805	0.118	0.823	0.0889	T:C
AT5G67590	FRO1	+	AT5G67590.1	387.8954905	2	5_26959352,5_26959409	0.151,0.0421	0.385,0.83	0.012,0.0195	A:G,A:G

## Sheet: HITS ECT3 roots
ID	GENE	TRANSCRIPTS	NAME	STRAND	REF	TARG	PROP	COUNT	log2FC	p-adj
1_229885	AT1G01630	AT1G01630.1	AT1G01630	+	A	G	0.0556736	131	0.850997	0.000301292
1_608073	AT1G02780	AT1G02780.1	RPL19A	-	T	C	0.033766	640	0.162706	0.0311149
1_608283	AT1G02780	AT1G02780.1	RPL19A	-	T	C	0.00319883	83	0.428272	0.0907621
1_1107149	AT1G04190	AT1G04190.1	TPR3	-	T	C	0.0130435	15	1.50728	0.0235672
1_1137760	AT1G04250	AT1G04250.1	IAA17	+	A	G	0.0183486	54	1.00029	0.0469573
1_1230607	AT1G04510	AT1G04510.1,AT1G04510.2	PRP19A	+	A	G	0.0325815	26	0.867023	0.0969331
1_1315399	AT1G04690	AT1G04690.1	KAB1	+	A	G	0.184486	352	0.669296	0.000813304
1_1314651	AT1G04690	AT1G04690.1	KAB1	+	A	G	0.00836502	33	2.34362	0.00397209
1_1365458	AT1G04850	AT1G04850.1,AT1G04850.2	AT1G04850	-	T	C	0.439201	968	0.267325	1.62021e-05
1_1509353	AT1G05205	AT1G05205.1	AT1G05205	-	T	C	0.0427109	121	0.587902	0.0850558
1_1629068	AT1G05500	AT1G05500.1,AT1G05500.2	SYT5	+	A	G	0.0221948	18	1.51377	0.0778587
1_2381055	AT1G07700	AT1G07700.1,AT1G07700.3	AT1G07700	+	A	G	0.0432802	38	1.47541	0.066117
1_2439321	AT1G07890	AT1G07890.1,AT1G07890.6	APX1	+	A	G	0.000701416	16	2.0443	0.0120774
1_2468994	AT1G07960	AT1G07960.1,AT1G07960.2,AT1G07960.3,AT1G07960.4	PDIL5-1	+	A	G	0.0952381	60	1.0836	0.0623918
1_2640075	AT1G08370	AT1G08370.1	DCP1	+	A	G	0.0213953	23	1.4782	0.0690058
1_2973189	AT1G09210	AT1G09210.1	CRT2	-	T	C	0.0127011	90	0.574372	0.00105692
1_2973117	AT1G09210	AT1G09210.1	CRT2	-	T	C	0.0027891	13	2.29611	0.0821155
1_3042636	AT1G09430	AT1G09430.1	ACLA-3	+	A	G	0.0181336	41	1.88621	0.00136782
1_3166919	AT1G09780	AT1G09780.1	PGM1	-	T	C	0.0162656	121	0.663407	0.0609583
1_3166672	AT1G09780	AT1G09780.1	PGM1	-	T	C	0.00153674	11	12.355	0.0650103
1_3196774	AT1G09840	AT1G09840.1,AT1G09840.11	ASK10	-	T	C	0.0183946	22	1.13691	0.0357681
1_3275285	AT1G10030	AT1G10030.1	ERG28	+	A	G	0.00213096	11	2.08682	0.0509979
1_3377049	AT1G10290	AT1G10290.1	DRP2A	+	A	G	0.161258	159	0.311058	0.0851288
1_3383339	AT1G10310	AT1G10310.1	AT1G10310	-	T	C	0.0325048	17	2.03863	0.0732268
1_3513734	AT1G10630	AT1G10630.1,AT1G10630.2	ATARFA1F	-	T	C	0.106423	951	0.457371	0.0118686
1_3513085	AT1G10630	AT1G10630.1,AT1G10630.2	ATARFA1F	-	T	C	0.0138313	30	1.37445	0.030379
1_3537776	AT1G10670	AT1G10670.1,AT1G10670.3	ACLA-1	+	A	G	0.026949	168	0.537007	0.00495606
1_3538064	AT1G10670	AT1G10670.1,AT1G10670.3	ACLA-1	+	A	G	0.0166706	70	0.872371	0.0128053
1_3536547	AT1G10670	AT1G10670.1,AT1G10670.3	ACLA-1	+	A	G	0.00753478	39	1.62276	0.0134047
1_3537550	AT1G10670	AT1G10670.1,AT1G10670.3	ACLA-1	+	A	G	0.00681009	44	1.53746	0.0220773
1_3536879	AT1G10670	AT1G10670.1,AT1G10670.3	ACLA-1	+	A	G	0.00584951	22	2.04422	0.0311074
1_3538111	AT1G10670	AT1G10670.1,AT1G10670.3	ACLA-1	+	A	G	0.00723043	23	1.63731	0.0632664
1_3663690	AT1G10950	AT1G10950.1	TMN1	+	A	G	0.139383	149	0.589955	0.0357622
1_3917865	AT1G11650	AT1G11650.2,AT1G11650.1	RBP45B	+	A	G	0.0634114	474	0.316682	0.0830354
1_3917952	AT1G11650	AT1G11650.2,AT1G11650.1	RBP45B	+	A	G	0.186041	845	0.207824	0.0979751
1_3996277	AT1G11840	AT1G11840.6,AT1G11840.5,AT1G11840.1	ATGLX1	+	A	G	0.000958483	19	3.00121	0.0442502
1_4050650	AT1G12000	AT1G12000.1	PFP-BETA1	-	T	C	0.0979981	607	0.297875	0.000794917
1_4050610	AT1G12000	AT1G12000.1	PFP-BETA1	-	T	C	0.0129521	106	0.570189	0.00113986
1_4378353	AT1G12840	AT1G12840.1	VHA-C	+	A	G	0.0335478	73	1.73927	9.85422e-05
1_4377451	AT1G12840	AT1G12840.1	VHA-C	+	A	G	0.0293232	146	0.878963	0.00215398
1_4375840	AT1G12840	AT1G12840.1	VHA-C	+	A	G	0.0621577	454	0.855341	0.00433525
1_4376018	AT1G12840	AT1G12840.1	VHA-C	+	A	G	0.0157227	88	0.832604	0.0437478
1_4454594	AT1G13060	AT1G13060.1,AT1G13060.2	PBE1	+	A	G	0.00214401	12	2.24203	0.0574652
1_4608449	AT1G13440	AT1G13440.1,AT1G13440.2	GAPC2	-	T	C	0.000467111	11	12.0516	0.0905983
1_4801430	AT1G14010	AT1G14010.1	AT1G14010	-	T	C	0.00531511	14	0.855646	0.0953896
1_4889452	AT1G14320	AT1G14320.1,AT1G14320.2	RPL10A	+	A	G	0.0609412	821	0.281816	0.0331884
1_4927311	AT1G14400	AT1G14400.1,AT1G14400.2	UBC1	-	T	C	0.0866142	264	0.568829	0.000534248
1_4986863	AT1G14570	AT1G14570.1,AT1G14570.3	PUX7	+	A	G	0.00947867	12	1.98902	0.0502519
1_4987113	AT1G14570	AT1G14570.1,AT1G14570.3	PUX7	+	A	G	0.0196813	21	1.73086	0.0970563
1_5165853	AT1G14980	AT1G14980.1,AT1G14980.2	CPN10	-	T	C	0.0640879	184	-0.663342	0.0625595
1_5204011	AT1G15120	AT1G15120.2,AT1G15120.1	AT1G15120	+	A	G	0.0373462	85	0.709846	0.010259
1_5203757	AT1G15120	AT1G15120.2,AT1G15120.1	AT1G15120	+	A	G	0.0398472	459	0.220849	0.0326434
1_5328701	AT1G15500	AT1G15500.1	AATP2	+	A	G	0.00962861	14	3.47758	0.0814161
1_5402225	AT1G15690	AT1G15690.1,AT1G15690.2	AVP1	+	A	G	0.0427553	198	0.543875	0.0333784
1_5402215	AT1G15690	AT1G15690.1,AT1G15690.2	AVP1	+	A	G	0.0275608	127	0.517536	0.0815093
1_5472722	AT1G15930	AT1G15930.1,AT1G15930.2	RPS12A	+	A	G	0.0089312	91	0.54569	0.0704241
1_5711826	AT1G16700	AT1G16700.1	AT1G16700	+	A	G	0.105299	155	0.847084	0.000235355
1_5711825	AT1G16700	AT1G16700.1	AT1G16700	+	A	G	0.206179	307	0.560447	0.000238165
1_5711827	AT1G16700	AT1G16700.1	AT1G16700	+	A	G	0.296048	442	0.359189	0.00142065
1_5711819	AT1G16700	AT1G16700.1	AT1G16700	+	A	G	0.0567474	82	1.11829	0.00584175
1_5711831	AT1G16700	AT1G16700.1	AT1G16700	+	A	G	0.0647182	93	0.900577	0.00660754
1_5774566	AT1G16880	AT1G16880.1,AT1G16880.2	ACR11	+	A	G	0.0190909	21	2.20845	0.033278
1_5776443	AT1G16890	AT1G16890.2,AT1G16890.3,AT1G16890.1	UBC36	-	T	C	0.0767386	96	0.656955	0.00900894
1_6093677	AT1G17720	AT1G17720.2,AT1G17720.1	PP2AB2	-	T	C	0.0843507	76	1.32516	0.0101969
1_6103980	AT1G17745	AT1G17745.1,AT1G17745.2	PGDH2	+	A	G	0.00624675	12	1.56522	0.0811704
1_6213878	AT1G18070	AT1G18070.1,AT1G18070.3	AT1G18070	-	T	C	0.104294	85	2.02554	1.17883e-07
1_6214257	AT1G18070	AT1G18070.1,AT1G18070.3	AT1G18070	-	T	C	0.193379	368	0.283744	0.0753861
1_6283552	AT1G18270	AT1G18270.1,AT1G18270.4,AT1G18270.2,AT1G18270.3	AT1G18270	-	T	C	0.104396	19	1.16583	0.0533438
1_6968839	AT1G20090	AT1G20090.1	ARAC4	+	A	G	0.0621302	21	1.60343	0.0655103
1_7020331	AT1G20260	AT1G20260.1	VHA-B3	+	A	G	0.0182283	57	1.15165	0.00268861
1_7019491	AT1G20260	AT1G20260.1	VHA-B3	+	A	G	0.0175225	115	0.709054	0.00966919
1_7130508	AT1G20580	AT1G20580.1	SMD3B	+	A	G	0.0651214	59	0.707726	0.0825183
1_7245468	AT1G20840	AT1G20840.1,AT1G20840.2	MSSP1	-	T	C	0.0328901	47	1.40859	0.000875859
1_7618353	AT1G21690	AT1G21690.1,AT1G21690.3,AT1G21690.4,AT1G21690.2	RFC4	+	A	G	0.149626	60	1.05208	0.0389426
1_7878999	AT1G22300	AT1G22300.1,AT1G22300.2,AT1G22300.3	GRF10	-	T	C	0.0243389	104	1.47141	5.34652e-06
1_7878975	AT1G22300	AT1G22300.1,AT1G22300.2,AT1G22300.3	GRF10	-	T	C	0.166899	598	0.614717	1.62021e-05
1_7878976	AT1G22300	AT1G22300.1,AT1G22300.2,AT1G22300.3	GRF10	-	T	C	0.0432388	157	0.969473	0.0128053
1_7881142	AT1G22300	AT1G22300.1,AT1G22300.2,AT1G22300.3	GRF10	-	T	C	0.00410256	12	12.6471	0.081402
1_7914705	AT1G22410	AT1G22410.1	AT1G22410	+	A	G	0.00371287	21	1.09107	0.0702499
1_7926995	AT1G22450	AT1G22450.1	COX6B-1	+	A	G	0.238989	586	0.427636	0.00179438
1_8080079	AT1G22850	AT1G22850.1	AT1G22850	-	T	C	0.000683332	12	3.30174	0.0782561
1_8224321	AT1G23190	AT1G23190.1	PGM3	+	A	G	0.0812826	109	2.29741	6.49632e-09
1_8223507	AT1G23190	AT1G23190.1	PGM3	+	A	G	0.0137548	57	1.6662	0.0212142
1_8222723	AT1G23190	AT1G23190.1	PGM3	+	A	G	0.00731452	21	1.79808	0.0440303
1_8563015	AT1G24180	AT1G24180.1	IAR4	-	T	C	0.00205304	12	11.3948	0.044036
1_8560655	AT1G24180	AT1G24180.1	IAR4	-	T	C	0.0164562	43	1.02435	0.0488277
1_8685869	AT1G24510	AT1G24510.1,AT1G24510.3,AT1G24510.2	CCT5	-	T	C	0.0553461	411	0.414035	0.00432091
1_8685610	AT1G24510	AT1G24510.1,AT1G24510.3,AT1G24510.2	CCT5	-	T	C	0.00362144	15	1.53081	0.0156339
1_8685538	AT1G24510	AT1G24510.1,AT1G24510.3,AT1G24510.2	CCT5	-	T	C	0.00406377	13	3.32507	0.0531573
1_8686515	AT1G24510	AT1G24510.1,AT1G24510.3,AT1G24510.2	CCT5	-	T	C	0.00129548	12	13.6064	0.0588817
1_8686665	AT1G24510	AT1G24510.1,AT1G24510.3,AT1G24510.2	CCT5	-	T	C	0.00658395	52	0.987587	0.0770306
1_8855222	AT1G25260	AT1G25260.1	AT1G25260	-	T	C	0.0053918	15	1.30738	0.0819103
1_9172451	AT1G26550	AT1G26550.1	AT1G26550	+	A	G	0.00255165	31	0.495373	0.0728277
1_9376229	AT1G27000	AT1G27000.1	AT1G27000	+	A	G	0.182392	491	0.314362	0.00445673
1_9376313	AT1G27000	AT1G27000.1	AT1G27000	+	A	G	0.0518382	141	0.457745	0.00660047
1_9533929	AT1G27450	AT1G27450.2,AT1G27450.1,AT1G27450.3	APT1	+	A	G	0.104503	311	0.848301	7.90943e-06
1_9533931	AT1G27450	AT1G27450.2,AT1G27450.1,AT1G27450.3	APT1	+	A	G	0.0405968	117	1.24115	5.61384e-05
1_9533930	AT1G27450	AT1G27450.2,AT1G27450.1,AT1G27450.3	APT1	+	A	G	0.0363886	106	0.810204	0.0457572
1_10258542	AT1G29330	AT1G29330.1	ERD2A	-	T	C	0.0658996	63	0.88019	0.069305
1_10640406	AT1G30230	AT1G30230.1,AT1G30230.2	AT1G30230	+	A	G	0.00401957	46	0.776918	0.0535724
1_10639559	AT1G30230	AT1G30230.1,AT1G30230.2	AT1G30230	+	A	G	0.000758987	11	3.17086	0.0792784
1_10831808	AT1G30580	AT1G30580.1	AT1G30580	-	T	C	0.111111	158	0.72674	0.0255136
1_10831883	AT1G30580	AT1G30580.1	AT1G30580	-	T	C	0.161364	497	0.274086	0.0265457
1_10833130	AT1G30580	AT1G30580.1	AT1G30580	-	T	C	0.00195925	15	1.08853	0.0719413
1_10859141	AT1G30630	AT1G30630.1	AT1G30630	-	T	C	0.0505232	169	0.705181	4.7878e-05
1_10858542	AT1G30630	AT1G30630.1	AT1G30630	-	T	C	0.149289	378	0.388047	0.0244748
1_11218073	AT1G31340	AT1G31340.1	RUB1	-	T	C	0.00735294	12	1.21075	0.0965171
1_12007526	AT1G33110	AT1G33110.1,AT1G33110.2	AT1G33110	+	A	G	0.0119803	17	2.32187	0.0330672
1_12012204	AT1G33120	AT1G33120.1	RPL9B	+	A	G	0.00133741	14	2.49754	0.0415494
1_12369074	AT1G34020	AT1G34020.1,AT1G34020.3	AT1G34020	+	A	G	0.107023	32	1.42085	0.0867882
1_12370245	AT1G34030	AT1G34030.1	RPS18A	-	T	C	0.0851477	219	0.479094	0.0225496
1_12431257	AT1G34130	AT1G34130.1	STT3B	+	A	G	0.0678899	37	0.79027	0.0860456
1_13122571	AT1G35580	AT1G35580.1,AT1G35580.2	CINV1	-	T	C	0.163743	812	0.272915	0.0148193
1_13226429	AT1G35730	AT1G35730.1,AT1G35730.2	APUM9	-	T	C	0.000496547	11	2.96279	0.081397
1_13453006	AT1G36050	AT1G36050.2,AT1G36050.1	AT1G36050	+	A	G	0.0217028	13	3.5213	0.0115069
1_13452870	AT1G36050	AT1G36050.2,AT1G36050.1	AT1G36050	+	A	G	0.312094	240	0.35206	0.0348794
1_13452709	AT1G36050	AT1G36050.2,AT1G36050.1	AT1G36050	+	A	G	0.0159236	15	1.69856	0.0773467
1_16941751	AT1G44835	AT1G44835.1,AT1G44835.2	AT1G44835	+	A	G	0.125858	110	0.454778	0.0661448
1_17321277	AT1G47260	AT1G47260.1	GAMMACA2	-	T	C	0.100646	187	0.647311	0.000654115
1_17321398	AT1G47260	AT1G47260.1	GAMMACA2	-	T	C	0.0552251	260	0.383579	0.00136782
1_17339067	AT1G47290	AT1G47290.2,AT1G47290.1	3BETAHSD/D1	+	A	G	0.0809969	26	1.24148	0.0766206
1_17462087	AT1G47550	AT1G47550.1,AT1G47550.2	SEC3A	+	A	G	0.0410557	28	1.48134	0.0813619
1_17460866	AT1G47550	AT1G47550.1,AT1G47550.2	SEC3A	+	A	G	0.0456674	39	1.09343	0.0974038
1_17783642	AT1G48140	AT1G48140.1,AT1G48140.2	AT1G48140	+	A	G	0.0392435	83	0.451318	0.0658688
1_17786684	AT1G48160	AT1G48160.1,AT1G48160.2	SRP19	-	T	C	0.0764331	24	1.30961	0.0128132
1_17886481	AT1G48410	AT1G48410.1,AT1G48410.2	AGO1	-	T	C	0.0428986	74	1.69519	0.00308942
1_17886383	AT1G48410	AT1G48410.1,AT1G48410.2	AGO1	-	T	C	0.0610743	83	0.953558	0.00323606
1_17969024	AT1G48600	AT1G48600.2,AT1G48600.1	NMT2	+	A	G	0.0121152	61	1.02962	0.0361904
1_17969062	AT1G48600	AT1G48600.2,AT1G48600.1	NMT2	+	A	G	0.0676265	310	0.392278	0.0753861
1_18036090	AT1G48750	AT1G48750.1	AT1G48750	+	A	G	0.00235524	53	1.00651	0.0273294
1_18218192	AT1G49240	AT1G49240.1	ACT8	+	A	G	0.0412371	64	2.18433	5.73305e-07
1_18216596	AT1G49240	AT1G49240.1	ACT8	+	A	G	0.00139991	15	2.61969	0.0632243
1_18218086	AT1G49240	AT1G49240.1	ACT8	+	A	G	0.0480342	281	0.430583	0.0803399
1_18236986	AT1G49300	AT1G49300.1,AT1G49300.2	RABG3E	+	A	G	0.0257781	82	0.956445	0.0124531
1_18357112	AT1G49600	AT1G49600.1,AT1G49600.2	RBP47A	-	T	C	0.06298	123	0.369925	0.0728277
1_18419933	AT1G49760	AT1G49760.1	PAB8	+	A	G	0.0482574	18	3.77906	0.0146172
1_18519332	AT1G50010	AT1G50010.1	TUBA4	+	A	G	0.0340053	167	0.814975	0.000104715
1_18682170	AT1G50430	AT1G50430.1,AT1G50430.2	DWF5	-	T	C	0.0294118	42	1.61833	0.0100753
1_19103028	AT1G51510	AT1G51510.1	Y14	-	T	C	0.126546	266	0.427761	0.00104061
1_19128316	AT1G51590	AT1G51590.1,AT1G51590.2	MNS1	-	T	C	0.217033	79	0.926937	0.0269507
1_19153780	AT1G51650	AT1G51650.1	AT1G51650	+	A	G	0.0289148	154	1.08407	2.76801e-07
1_19153693	AT1G51650	AT1G51650.1	AT1G51650	+	A	G	0.0857164	1160	0.465143	1.17128e-06
1_19153678	AT1G51650	AT1G51650.1	AT1G51650	+	A	G	0.0168018	257	0.352027	0.0211924
1_19153676	AT1G51650	AT1G51650.1	AT1G51650	+	A	G	0.000763262	12	1.74405	0.0461546
1_19176194	AT1G51710	AT1G51710.1,AT1G51710.2	UBP6	-	T	C	0.0268199	42	1.07105	0.0499323
1_19176190	AT1G51710	AT1G51710.1,AT1G51710.2	UBP6	-	T	C	0.0304225	54	1.17376	0.0796437
1_19325394	AT1G51980	AT1G51980.1,AT1G51980.2	AT1G51980	-	T	C	0.106792	684	0.529071	4.76093e-07
1_19325375	AT1G51980	AT1G51980.1,AT1G51980.2	AT1G51980	-	T	C	0.0214964	154	0.575017	0.00460356
1_19324251	AT1G51980	AT1G51980.1,AT1G51980.2	AT1G51980	-	T	C	0.00740821	68	0.875748	0.0547237
1_19365733	AT1G52070	AT1G52070.1,AT1G52070.2	JAL10	-	T	C	0.0581542	874	0.567423	3.0114e-10
1_19508698	AT1G52370	AT1G52370.1,AT1G52370.2,AT1G52370.3,AT1G52370.4	AT1G52370	+	A	G	0.0377834	15	0.686074	0.0946483
1_19529761	AT1G52420	AT1G52420.1	AT1G52420	+	A	G	0.0313316	24	2.63271	0.0314109
1_19854861	AT1G53240	AT1G53240.1	mMDH1	-	T	C	0.0595761	312	0.52811	0.00147558
1_19855042	AT1G53240	AT1G53240.1	mMDH1	-	T	C	0.00140295	14	13.8211	0.00751283
1_19884648	AT1G53310	AT1G53310.1,AT1G53310.2,AT1G53310.3	PPC1	-	T	C	0.0646577	221	0.712952	0.000319514
1_19884472	AT1G53310	AT1G53310.1,AT1G53310.2,AT1G53310.3	PPC1	-	T	C	0.0558864	244	0.593333	0.000655484
1_19884719	AT1G53310	AT1G53310.1,AT1G53310.2,AT1G53310.3	PPC1	-	T	C	0.0400891	162	0.774728	0.0264518
1_20104520	AT1G53850	AT1G53850.1,AT1G53850.2	PAE1	-	T	C	0.0408037	132	0.525838	0.0431642
1_20136779	AT1G53910	AT1G53910.1,AT1G53910.3	RAP2-12	+	A	G	0.0501931	117	0.632405	0.00773974
1_20136793	AT1G53910	AT1G53910.1,AT1G53910.3	RAP2-12	+	A	G	0.0786458	151	0.456305	0.0968201
1_20793876	AT1G55640	AT1G55640.1	PRA1G1	+	A	G	0.229508	14	11.7831	0.044036
1_21086869	AT1G56330	AT1G56330.1	SAR1B	-	T	C	0.10414	561	0.409655	0.00315868
1_21086666	AT1G56330	AT1G56330.1	SAR1B	-	T	C	0.0146413	40	1.54981	0.00348504
1_21086784	AT1G56330	AT1G56330.1	SAR1B	-	T	C	0.00825116	41	1.12644	0.0724958
1_21899273	AT1G59610	AT1G59610.1	DRP2B	+	A	G	0.131435	120	0.363864	0.0943047
1_22053663	AT1G59900	AT1G59900.1	E1 ALPHA	+	A	G	0.0453686	96	0.734285	0.00359198
1_22143939	AT1G60070	AT1G60070.1,AT1G60070.2	AT1G60070	-	T	C	0.171369	164	1.31484	9.28314e-10
1_22144441	AT1G60070	AT1G60070.1,AT1G60070.2	AT1G60070	-	T	C	0.0863422	55	1.6248	0.000131531
1_22462510	AT1G60989	AT1G60989.1	SCRL7	+	A	G	0.0190694	75	0.365855	0.0605933
1_22810295	AT1G61770	AT1G61770.1	C50	+	A	G	0.166667	231	0.679516	0.00363796
1_22811068	AT1G61770	AT1G61770.1	C50	+	A	G	0.0203106	17	1.87749	0.0350809
1_22922192	AT1G62020	AT1G62020.1	AT1G62020	+	A	G	0.0783972	45	0.776072	0.016242
1_23255199	AT1G62800	AT1G62800.2,AT1G62800.1,AT1G62800.3	ASP4	-	T	C	0.0105847	21	1.43526	0.0198647
1_23670113	AT1G63810	AT1G63810.1,AT1G63810.2	AT1G63810	-	T	C	0.0918803	43	1.18547	0.0510776
1_23834962	AT1G64230	AT1G64230.1,AT1G64230.4,AT1G64230.3	UBC28	+	A	G	0.00132639	14	1.3319	0.0794752
1_23834989	AT1G64230	AT1G64230.1,AT1G64230.4,AT1G64230.3	UBC28	+	A	G	0.0109943	91	0.40834	0.0916151
1_23833835	AT1G64230	AT1G64230.1,AT1G64230.4,AT1G64230.3	UBC28	+	A	G	0.00625527	89	0.514481	0.0920759
1_24228790	AT1G65220	AT1G65220.1	AT1G65220	+	A	G	0.0936047	161	1.00027	0.0042037
1_24228609	AT1G65220	AT1G65220.1	AT1G65220	+	A	G	0.00957934	23	1.48499	0.0128053
1_24227734	AT1G65220	AT1G65220.1	AT1G65220	+	A	G	0.0137221	40	1.02242	0.0801798
1_24249242	AT1G65290	AT1G65290.1	MTACP2	-	T	C	0.000990622	15	3.70445	0.0113423
1_24295976	AT1G65410	AT1G65410.1	TGD3	+	A	G	0.0514706	14	2.45092	0.077705
1_24541474	AT1G65930	AT1G65930.1	CICDH	+	A	G	0.00759915	128	0.436763	0.068813
1_24559690	AT1G65980	AT1G65980.1	PRXIIB	-	T	C	0.0155568	221	0.196638	0.0792784
1_24686345	AT1G66240	AT1G66240.1,AT1G66240.2,AT1G66240.3	ATX1	-	T	C	0.0828422	492	0.328549	0.0367698
1_24866356	AT1G66680	AT1G66680.1	AR401	-	T	C	0.0513347	50	1.38371	0.0393385
[truncated: 798 more rows]

## Sheet: GENES ECT3 roots
GENE	NAME	STRAND	TRANSCRIPTS	TPM	HITS	IDs	PROP	log2FC	p-adj	MISMATCH TYPE
[truncated: 553 more rows]
