# Supplementary material for: The YTHDF proteins ECT2 and ECT3 bind largely overlapping target sets and influence target mRNA abundance, not alternative polyadenylation
Source: eLife journal article supplement (doi:10.7554/elife.72377), 2021-09-30
Supplement: supp [file elife-72377-supp-v1.zip › elife_poa_e72377_Supplementary_file_3.xlsx]

## Sheet: Info
Supplementary File 3
ECT2/ECT3-target sets
Genes included in this table	All genes expressed in any of the HyperTRIBE (HT) datasets (RNA-Seq from dissected apices and root tips of 10-day-old seedlings of ECT2 and ECT3 -ADAR lines), plus 42 genes with ECT2-iCLIP hits (from 12-day-old whole seedlings) with expression below detection in the HyperTRIBE datasets
ECT2/ECT3 Target Status	The target status is assigned separately for aerial and root tissues. Additionally, we have integrated data from both types of tissues in "whole seedlings" by direct addition of HyperTRIBE hits (edited sites) in aerial and root tissues, combined with ECT2-iCLIP data (obtained directly from mixed tissues in seedlings). Stringent target set: Defined as the intersection between ECT2-iCLIP-defined ta…
References for External data	We have included infomation on publically available data from the following sources: Nanopore and miCLIP (seedlings): * Parker, M.T., Knop, K., Sherwood, A.V., Schurch, N.J., Mackinnon, K., Gould, P.D., Hall, A.J.W., Barton, G.J., and Simpson, G.G. (2020). Nanopore direct RNA sequencing maps the complexity of Arabidopsis mRNA processing and m6A modification. eLife 9, e49658. m6A-Seq-seedlings: **…

## Sheet: Headers
Data type	Column Headers	Description	Values
ID	Gene_ID	AGI locus code
	Prot_ID	Protein accession number
	ARAPORT11	Gene name from Araport11
	TAIR10	Gene name from TAIR10
	Description	Gene description from Araport11
ECT2/ECT3 target identification (data from this article)	Whole Seedlings_ECT2/3-Target Status	ECT2/ECT3 Target Status in Whole Seedlings	Values are STRINGENT/PERMISSIVE/Non-Target/N.A. as described in the accompanying Info-sheet. Note: as the Stringent target sets are contained within the Permissive target sets, targets assigned "PERMISSIVE" status are those not contained in the corresponding Stringent set.
	AERIAL_ECT2/3-Target Status	ECT2/ECT3 Target Status in aerial tissues
	ROOT_ECT2/3-Target Status	ECT2/ECT3 Target Status in roots
	ECT2-HT_AERIAL	Support from ECT2 HyperTRIBE-target identification in aerial tissues of 10 day-old seedlings	YES if the gene is identified as a target in the corresponding HyperTRIBE dataset NO if the gene is not identified as a target in the corresponding HyperTRIBE dataset N.E.(Not expressed) if expression of the gene is not detected in the corresponding HyperTRIBE dataset
	ECT3-HT_AERIAL	Support from ECT3 HyperTRIBE-target identification in aerial tissues of 10 day-old seedlings
	ECT2-HT_ROOTS	Support from ECT2 HyperTRIBE-target identification in roots of 10 day-old seedlings
	ECT3-HT_ROOTS	Support from ECT3 HyperTRIBE-target identification in roots of 10 day-old seedlings
	ECT2-iCLIP	Support from ECT2mCherry iCLIP-target identification (wild type, 110 kDa-band) in whole 12-day-old seedlings	GENE BODY LOCATION of the peak(s) (5'UTR/CDS/3'UTR/INTRON), if the gene is identified as a target by ECT2 iCLIP. NO if the gene is not identified as a target by ECT2-iCLIP
External Data	ECT2-FA-CLIP ***	Support from ECT2 FA-CLIP-target identification (in seedlings) and gene body location according to Wei et al., 2018 (The Plant Cell)	GENE BODY LOCATION of the peak(s), according to Wei et al., if the gene is identified as a target by ECT2-FA-CLIP. NO if the gene is not identified as a target by ECT2-FA-CLIP
	Nanopore *	Presence of m6A in the transcript (in seedlings) according to Nanopore (Parker et al., 2020. eLIFE)	GENE BODY LOCATION (5'UTR/CDS/3'UTR/INTRON) of the hit(s) if m6A is detected in the transcript by Nanopore RNA-sequencing. The locations have been annotated by us from the coordinates provided by Parker et al. N.A. if the hit(s) do not fall into any of the four categories 3'UTR, CDS, 5'UTR, intron (typically sORFs or lncRNAs) NO if m6A is not detected in the transcript by Nanopore RNA-sequencing
	miCLIP *	Presence of m6A in the transcript (in seedlings) according to miCLIP (Parker et al., 2020. eLIFE)	GENE BODY LOCATION (5'UTR/CDS/3'UTR/INTRON) of the hit(s) if m6A is detected in the transcript by miCLIP RNA-sequencing. The locations have been annotated by us from the coordinates provided by Parker et al. N.A. if the hit(s) do not fall into any of the four catogires: 3'UTR, CDS, 5'UTR, intron (typically sORFs or lncRNAs) NO if m6A is not detected in the transcript by miCLIP RNA-sequencing
	m6A-Seq ** (seedlings)	Presence of m6A in the transcript (in seedlings) according to m6A-Seq (Shen et al., 2016. Dev. Cell)	GENE BODY LOCATION of the peak(s), according to Shen et al., if the transcript is identified as containing m6A NO if the transcript is not identified as containing m6A
	m6A-Seq **** (leaves)	Presence of m6A in the transcript (in leaves) according to m6A-Seq (Anderson et al., 2018. Cell Reports)	GENE BODY LOCATION (5'UTR/CDS/3'UTR/INTRON) of the hit(s) if the transcript is identified as containing m6A. The locations have been annotated by us from the coordinates provided by Anderson et al. N.A. if the hit(s) do not fall into any of the four categories 3'UTR, CDS, 5'UTR, intron (typically sORFs or lncRNAs). NO if the transcript is not identified as containing m6A

## Sheet: Target sets
Gene_ID	Prot_ID	ARAPORT11	TAIR10	Description	Whole seedlings ECT2/3 Target Status	AERIAL ECT2/3 Target Status	ROOT ECT2/3 Target Status	ECT2-HT AERIAL	ECT3-HT AERIAL	ECT2-HT ROOTS	ECT3-HT ROOTS	ECT2 iCLIP	ECT2 FA-CLIP ***	Nanopore *	miCLIP *	m6A-Seq ** (seedlings)	m6A-Seq **** (leaves)
AT1G01050	Q93V56	PPa1	AtPPa1, PPa1	pyrophosphorylase 1	STRINGENT	STRINGENT	STRINGENT	YES	NO	YES	YES	3'UTR	NO	3'UTR	3'UTR	Stop codon	3'UTR
AT1G01060	F4HQG9, F4HQH3, Q6R0H1	LHY	LHY, LHY1	Homeodomain-like superfamily protein	STRINGENT	N.A.	STRINGENT	NO	NO	YES	NO	3'UTR,3'UTR,3'UTR,3'UTR	5'UTR	NO	NO	NO	3'UTR
AT1G01090	O24457	PDH-E1 ALPHA	PDH-E1 ALPHA	pyruvate dehydrogenase E1 alpha	STRINGENT	STRINGENT	STRINGENT	YES	YES	YES	NO	3'UTR	5'UTR	3'UTR	3'UTR	CDS	NO
AT1G01100	A8MQK8, Q8LCW9	AT1G01100	RPP1.1, RPP1A	60S acidic ribosomal protein family	STRINGENT	STRINGENT	STRINGENT	YES	YES	YES	YES	3'UTR,3'UTR,3'UTR,3'UTR	NO	3'UTR	3'UTR, 5'UTR, CDS	Stop codon	NO
AT1G01170	Q2HIQ2	AT1G01170		ozone-responsive stress-like protein (DUF1138)	STRINGENT	STRINGENT	N.A.	YES	NO	NO	NO	3'UTR,3'UTR	3'UTR, CDS	NO	3'UTR	Stop codon	NO
AT1G01540	F4HSC9, Q3EDL4, Q570G5	AT1G01540		Protein kinase superfamily protein	STRINGENT	STRINGENT	STRINGENT	YES	NO	YES	NO	3'UTR,3'UTR	NO	NO	3'UTR	NO	NO
AT1G01630	Q9LQ96	AT1G01630		Sec14p-like phosphatidylinositol transfer family protein	STRINGENT	STRINGENT	STRINGENT	YES	YES	YES	YES	CDS,3'UTR	NO	3'UTR	NO	NO	3'UTR
AT1G01800	A8MQD9, Q94K30, Q9LQ75	AT1G01800		NAD(P)-binding Rossmann-fold superfamily protein	STRINGENT	N.A.	STRINGENT	NO	NO	YES	NO	3'UTR,3'UTR	NO	NO	3'UTR	NO	3'UTR
AT1G01820	Q9LQ73	PEX11C	PEX11C	peroxin 11c	STRINGENT	STRINGENT	STRINGENT	YES	YES	YES	YES	3'UTR	NO	3'UTR	3'UTR	NO	3'UTR
AT1G01910	A0A178WLD8, A0A178WMJ0, B3H5S5, F4HU77, Q949M9	AT1G01910	AtGET3a, GET3a	P-loop containing nucleoside triphosphate hydrolases superfamily protein	STRINGENT	STRINGENT	STRINGENT	YES	YES	YES	YES	3'UTR,3'UTR,3'UTR,3'UTR,3'UTR	NO	3'UTR	3'UTR	coding_intron	3'UTR
AT1G02080	A0A1P8ARB7, F4HVV6, F4HVV7	AT1G02080		transcription regulator	STRINGENT	STRINGENT	STRINGENT	YES	NO	YES	NO	3'UTR,3'UTR,3'UTR	3'UTR	3'UTR	3'UTR	Stop codon	CDS, 3'UTR
AT1G02120	A0A1P8AQ01, A0A1P8AQ22, F4HVW5	VAD1	VAD1	GRAM domain family protein	STRINGENT	STRINGENT	STRINGENT	YES	NO	YES	NO	3'UTR,3'UTR,3'UTR	3'UTR	3'UTR	3'UTR	Stop codon	3'UTR
AT1G02140	O23676	MAGO	HAP1, MAGO, MEE63	mago nashi family protein	STRINGENT	STRINGENT	STRINGENT	YES	YES	YES	YES	3'UTR	3'UTR	3'UTR	3'UTR	3' UTR	NO
AT1G02280	O23680	TOC33	ATTOC33, PPI1, TOC33	translocon at the outer envelope membrane of chloroplasts 33	STRINGENT	STRINGENT	STRINGENT	YES	YES	YES	YES	3'UTR,3'UTR	NO	3'UTR	3'UTR	NO	3'UTR
AT1G02305	Q93VC9	AT1G02305	AtcathB2	Cysteine proteinases superfamily protein	STRINGENT	N.A.	STRINGENT	NO	NO	YES	NO	3'UTR	NO	3'UTR	3'UTR	NO	5'UTR, 3'UTR
AT1G02500	P23686	SAM1	AtSAM1, MAT1, METK1, SAM-1, SAM1	S-adenosylmethionine synthetase 1	STRINGENT	STRINGENT	STRINGENT	YES	YES	YES	YES	3'UTR,3'UTR	CDS, 5'UTR	3'UTR	3'UTR	NO	NO
AT1G02560	Q9S834	CLPP5	CLPP5, NCLPP1, NCLPP5	nuclear encoded CLP protease 5	STRINGENT	STRINGENT	STRINGENT	YES	YES	YES	YES	3'UTR	NO	3'UTR	3'UTR	Stop codon	NO
AT1G02780	Q9SRX2	emb2386	emb2386	Ribosomal protein L19e family protein	STRINGENT	STRINGENT	STRINGENT	YES	YES	YES	YES	3'UTR	NO	3'UTR	3'UTR, 5'UTR, CDS	Stop codon	NO
AT1G03330	Q1H595	2	2	Small nuclear ribonucleoprotein family protein	STRINGENT	STRINGENT	STRINGENT	YES	YES	YES	YES	3'UTR	NO	3'UTR	3'UTR	Stop codon	3'UTR
AT1G03600	Q9LR64	PSB27	PSB27	photosystem II family protein	STRINGENT	STRINGENT	N.A.	YES	YES	NO	NO	3'UTR	3'UTR	3'UTR	3'UTR, CDS	NO	NO
AT1G03630	F4I2F8, O48741	POR C	POR C, PORC	protochlorophyllide oxidoreductase C	STRINGENT	STRINGENT	N.A.	NO	YES	NO	NO	CDS,CDS	3'UTR	3'UTR	3'UTR	Stop codon	NO
AT1G03680	O48737	THM1	ATHM1, ATM1, THM1, TRX-M1	thioredoxin M-type 1	STRINGENT	STRINGENT	N.A.	YES	YES	NO	NO	3'UTR	NO	3'UTR	3'UTR, CDS	Stop codon	NO
AT1G03860	Q9ZNT7, Q9ZNT7-2	PHB2	ATPHB2, PHB2	prohibitin 2	STRINGENT	STRINGENT	STRINGENT	YES	NO	YES	YES	3'UTR,3'UTR,3'UTR	NO	3'UTR	3'UTR	3' UTR	3'UTR
AT1G03900	Q681Q7	ABCI18	ABCI18, ATNAP4, NAP4	non-intrinsic ABC protein 4	STRINGENT	STRINGENT	STRINGENT	YES	YES	YES	YES	3'UTR	NO	3'UTR	3'UTR	NO	3'UTR
AT1G04080	A0A178W2Y2, A0A178W4I0, A0A1P8ATH2, F4I448, F4I450, O64496, Q93ZR3	PRP39	PRP39, PRP39a	Tetratricopeptide repeat (TPR)-like superfamily protein	STRINGENT	STRINGENT	STRINGENT	YES	YES	YES	YES	3'UTR,3'UTR,3'UTR,3'UTR,3'UTR	NO	3'UTR	3'UTR	Stop codon	3'UTR
AT1G04170	O64490	EIF2 GAMMA	EIF2 GAMMA	eukaryotic translation initiation factor 2 gamma subunit	STRINGENT	STRINGENT	STRINGENT	YES	YES	YES	YES	3'UTR,3'UTR	CDS	3'UTR	3'UTR	Stop codon	3'UTR
AT1G04250	P93830	AXR3	AtIAA17, AXR3, IAA17	AUX/IAA transcriptional regulator family protein	STRINGENT	N.A.	STRINGENT	NO	NO	YES	YES	3'UTR	NO	3'UTR	3'UTR	NO	3'UTR
AT1G04270	F4I472, Q08112	RPS15	RPS15	cytosolic ribosomal protein S15	STRINGENT	STRINGENT	STRINGENT	YES	YES	YES	YES	3'UTR,3'UTR	NO	3'UTR	3'UTR, 5'UTR	Stop codon	NO
AT1G04410	P93819	c-NAD-MDH1	c-NAD-MDH1	Lactate/malate dehydrogenase family protein	STRINGENT	STRINGENT	STRINGENT	YES	YES	YES	YES	3'UTR	NO	3'UTR	3'UTR, 5'UTR, CDS	3' UTR	NO
AT1G04420	Q8VZ23	AT1G04420		NAD(P)-linked oxidoreductase superfamily protein	STRINGENT	STRINGENT	STRINGENT	YES	YES	YES	NO	3'UTR	NO	3'UTR	3'UTR	Stop codon	3'UTR
AT1G04430	Q940J9	AT1G04430		S-adenosyl-L-methionine-dependent methyltransferases superfamily protein	STRINGENT	N.A.	STRINGENT	NO	NO	NO	YES	3'UTR,3'UTR,3'UTR	3'UTR	3'UTR	3'UTR	NO	NO
AT1G04480	P49690	AT1G04480		Ribosomal protein L14p/L23e family protein	STRINGENT	STRINGENT	STRINGENT	YES	YES	YES	YES	3'UTR	NO	3'UTR	3'UTR, 5'UTR	Stop codon	3'UTR
AT1G04510	F4I5P3, Q94BR4	MAC3A	MAC3A	MOS4-associated complex 3A	STRINGENT	STRINGENT	STRINGENT	YES	YES	YES	YES	3'UTR,3'UTR	NO	3'UTR	3'UTR	Stop codon	3'UTR
AT1G04530	Q8VZ31	TPR4	TPR4	Tetratricopeptide repeat (TPR)-like superfamily protein	STRINGENT	STRINGENT	STRINGENT	YES	NO	YES	NO	3'UTR	NO	3'UTR	3'UTR	NO	3'UTR
AT1G04750	A0A1P8AS81, Q9ZTW3	VAMP721	AT VAMP7B, ATVAMP721, VAMP721, VAMP7B	vesicle-associated membrane protein 721	STRINGENT	STRINGENT	STRINGENT	YES	YES	YES	YES	3'UTR,3'UTR,3'UTR,3'UTR	NO	3'UTR	3'UTR	3' UTR	3'UTR
AT1G04820	B9DGT7	TUA4	TOR2, TUA4	tubulin alpha-4 chain	STRINGENT	STRINGENT	STRINGENT	YES	NO	YES	YES	3'UTR	CDS	3'UTR	3'UTR	Stop codon	NO
AT1G04850	A0A1P8AW60, Q9MAT3	AT1G04850		ubiquitin-associated (UBA)/TS-N domain-containing protein	STRINGENT	STRINGENT	STRINGENT	YES	YES	YES	YES	3'UTR,3'UTR	NO	3'UTR	3'UTR	Stop codon	3'UTR
AT1G04940	Q8GZ79	Tic20-I	atTIC20, AtTic20-I, TIC20, Tic20-I	translocon at the inner envelope membrane of chloroplasts 20	STRINGENT	STRINGENT	STRINGENT	YES	YES	YES	YES	3'UTR	3'UTR	3'UTR	3'UTR	Stop codon	NO
AT1G04985	A0A384LBS7, Q84JL8	AT1G04985		triacylglycerol lipase-like protein	STRINGENT	STRINGENT	STRINGENT	YES	NO	YES	YES	3'UTR,3'UTR	StopCodon	3'UTR	3'UTR	NO	NO
AT1G05180	C0Z261, F4I7A3, F4I7A4, P42744	AXR1	AXR1	NAD(P)-binding Rossmann-fold superfamily protein	STRINGENT	STRINGENT	STRINGENT	YES	YES	YES	YES	3'UTR,3'UTR,3'UTR	NO	3'UTR	3'UTR	Stop codon	3'UTR
AT1G05190	O23049	emb2394	EMB2394, RPL6	Ribosomal protein L6 family	STRINGENT	STRINGENT	STRINGENT	YES	YES	YES	YES	3'UTR	NO	3'UTR	3'UTR	NO	NO
AT1G05850	Q9MA41	POM1	ATCTL1, CTL1, ELP, ELP1, ERH2, HOT2, POM1	Chitinase family protein	STRINGENT	STRINGENT	STRINGENT	YES	NO	YES	NO	3'UTR,3'UTR	NO	3'UTR	3'UTR, CDS	Stop codon	NO
AT1G06040	F4IBY7, Q96288	STO	BBX24, STO	B-box zinc finger family protein	STRINGENT	STRINGENT	N.A.	YES	NO	NO	NO	3'UTR,3'UTR	NO	3'UTR	3'UTR	Stop codon	NO
AT1G06390	Q39012	GSK1	ATGSK1, ATSK2-3, ATSK22, BIL2, GSK1, SK22	GSK3/SHAGGY-like protein kinase 1	STRINGENT	STRINGENT	N.A.	YES	NO	NO	NO	3'UTR,3'UTR,3'UTR	NO	3'UTR	3'UTR	Stop codon	3'UTR
AT1G06400	P28185	-2	ARA-2, ARA2, ATRAB11E, ATRABA1A	Ras-related small GTP-binding family protein	STRINGENT	STRINGENT	STRINGENT	YES	NO	YES	NO	3'UTR	NO	3'UTR	3'UTR	Stop codon	3'UTR
AT1G06410	Q9LMI0	TPS7	ATTPS7, ATTPSA, TPS7	trehalose-phosphatase/synthase 7	STRINGENT	STRINGENT	STRINGENT	YES	NO	YES	NO	3'UTR,3'UTR,3'UTR	NO	3'UTR	3'UTR	3' UTR	3'UTR
AT1G06430	Q8W585, Q9LMH8	FTSH8	FTSH8	FTSH protease 8	STRINGENT	STRINGENT	STRINGENT	YES	NO	YES	NO	3'UTR,3'UTR,3'UTR	NO	3'UTR	3'UTR	Stop codon	NO
AT1G06680	C0Z3I6, Q42029, Q42029-2	PSBP-1	OE23, OEE2, PSBP-1, PSII-P	photosystem II subunit P-1	STRINGENT	STRINGENT	STRINGENT	YES	YES	YES	NO	3'UTR,3'UTR	NO	CDS, 3'UTR	5'UTR, 3'UTR, CDS	NO	NO
AT1G06700	Q8H1G6	AT1G06700		Protein kinase superfamily protein	STRINGENT	STRINGENT	STRINGENT	YES	YES	YES	YES	3'UTR,3'UTR,3'UTR	StartCodon, 3'UTR	3'UTR	3'UTR	NO	3'UTR
AT1G06950	Q8LPR9	TIC110	ATTIC110, TIC110	translocon at the inner envelope membrane of chloroplasts 110	STRINGENT	STRINGENT	STRINGENT	YES	YES	YES	YES	3'UTR	3'UTR	3'UTR	3'UTR	Stop codon	3'UTR
AT1G07010	F4HNW0, F4HNW2, Q8L774	SLP1	AtSLP1, SLP1	Calcineurin-like metallo-phosphoesterase superfamily protein	STRINGENT	STRINGENT	N.A.	YES	NO	NO	NO	3'UTR,3'UTR,3'UTR	NO	NO	3'UTR	NO	3'UTR
AT1G07080	Q93VQ6, Q9LMK1	AT1G07080		Thioredoxin superfamily protein	STRINGENT	STRINGENT	STRINGENT	YES	YES	YES	YES	3'UTR	NO	3'UTR	3'UTR	Stop codon	3'UTR
AT1G07110	Q9MB58	F2KP	ATF2KP, F2KP, FKFBP	fructose-2,6-bisphosphatase	STRINGENT	STRINGENT	STRINGENT	YES	NO	YES	NO	3'UTR	NO	3'UTR	3'UTR	Stop codon	3'UTR
AT1G07140	Q9LMK7	SIRANBP	SIRANBP	Pleckstrin homology (PH) domain superfamily protein	STRINGENT	STRINGENT	STRINGENT	YES	NO	YES	YES	3'UTR	3'UTR	3'UTR	3'UTR	3' UTR	NO
AT1G07320	O50061, Q2V4Q4, Q3EDH2	RPL4	EMB2784, PRPL4, RPL4	ribosomal protein L4	STRINGENT	STRINGENT	STRINGENT	YES	YES	YES	YES	3'UTR,3'UTR,3'UTR	3'UTR	3'UTR	3'UTR	Stop codon	NO
AT1G07590	Q940Q2	AT1G07590		Tetratricopeptide repeat (TPR)-like superfamily protein	STRINGENT	STRINGENT	STRINGENT	YES	NO	NO	YES	5'UTR	NO	5'UTR	5'UTR	NO	NO
AT1G07700	Q9C5C5, Q9C5C5-2, Q9C5C5-3	AT1G07700		Thioredoxin superfamily protein	STRINGENT	STRINGENT	STRINGENT	YES	YES	YES	YES	3'UTR,3'UTR,3'UTR,3'UTR	NO	3'UTR	3'UTR	Stop codon	3'UTR
AT1G07770	P42798	RPS15A	RPS15A	ribosomal protein S15A	STRINGENT	STRINGENT	STRINGENT	YES	YES	YES	YES	3'UTR,3'UTR,3'UTR	NO	3'UTR	3'UTR	Stop codon	NO
AT1G07890	C0Z2H6, F4HU93, Q05431	APX1	APX1, ATAPX01, ATAPX1, CS1, MEE6	ascorbate peroxidase 1	STRINGENT	STRINGENT	STRINGENT	YES	YES	YES	YES	3'UTR,3'UTR,3'UTR,3'UTR,3'UTR,3'UTR,3'UTR,3'UTR	NO	3'UTR	3'UTR, 5'UTR	3' UTR	NO
AT1G07920	P0DH99	AT1G07920		GTP binding Elongation factor Tu family protein	STRINGENT	STRINGENT	STRINGENT	YES	YES	YES	YES	3'UTR	NO	3'UTR	3'UTR, CDS	3' UTR	NO
AT1G07930	F4HUA0, P0DH99, Q56Z84	AT1G07930		GTP binding Elongation factor Tu family protein	STRINGENT	STRINGENT	STRINGENT	YES	YES	YES	YES	3'UTR,3'UTR	NO	3'UTR	3'UTR, CDS	Stop codon	NO
AT1G07940	P0DH99	AT1G07940		GTP binding Elongation factor Tu family protein	STRINGENT	STRINGENT	STRINGENT	YES	YES	YES	YES	3'UTR,3'UTR,3'UTR,3'UTR	NO	3'UTR	3'UTR, CDS	3' UTR	NO
AT1G08110	B9DH52, Q8H0V3	AT1G08110	AtGLYI2, GLXI:3	lactoylglutathione lyase family protein / glyoxalase I family protein	STRINGENT	STRINGENT	STRINGENT	YES	YES	YES	YES	3'UTR,3'UTR,3'UTR,3'UTR	NO	3'UTR	3'UTR	3' UTR	3'UTR
AT1G08200	Q9SGE0	AXS2	AXS2	UDP-D-apiose/UDP-D-xylose synthase 2	STRINGENT	STRINGENT	STRINGENT	YES	NO	YES	YES	3'UTR	NO	3'UTR	3'UTR, 5'UTR	Stop codon	3'UTR
AT1G08360	Q8VZB9	AT1G08360		Ribosomal protein L1p/L10e family	STRINGENT	STRINGENT	STRINGENT	YES	YES	YES	YES	3'UTR	NO	3'UTR	3'UTR	Stop codon	NO
AT1G08380	Q949Q5	PSAO	PSAO	photosystem I subunit O	STRINGENT	STRINGENT	N.A.	YES	NO	NO	NO	CDS,3'UTR	NO	3'UTR	5'UTR, 3'UTR, CDS	NO	NO
AT1G08480	Q941A6	SDH6	SDH6	succinate dehydrogenase subunit	STRINGENT	STRINGENT	STRINGENT	YES	YES	YES	YES	3'UTR	NO	3'UTR	3'UTR	Stop codon	3'UTR
AT1G08490	Q93WX6	CPNIFS	ATCPNIFS, ATNFS2, ATSUFS, CPNIFS, SUFS	chloroplastic NIFS-like cysteine desulfurase	STRINGENT	STRINGENT	STRINGENT	YES	YES	YES	NO	3'UTR	3'UTR, CDS	3'UTR	3'UTR	3' UTR	3'UTR
AT1G08520	Q9SJE1	ALB1	ALB-1V, ALB1, CHLD, PDE166, V157	ALBINA 1	STRINGENT	STRINGENT	STRINGENT	YES	NO	YES	NO	3'UTR	NO	3'UTR	3'UTR	Stop codon	3'UTR
AT1G08640	Q93WG3	CJD1	CJD1	Chloroplast J-like domain 1	STRINGENT	STRINGENT	N.A.	YES	YES	NO	NO	3'UTR	NO	3'UTR	3'UTR	3' UTR	3'UTR
AT1G08830	A0A178WKK8, P24704	1	AtSOD1, CSD1, SOD1	copper/zinc superoxide dismutase 1	STRINGENT	STRINGENT	STRINGENT	YES	NO	YES	YES	3'UTR,3'UTR	3'UTR	3'UTR	3'UTR	NO	3'UTR
AT1G09020	Q944A6, Q944A6-2	SNF4	ATSNF4, KIN&#946;&#947;, SNF4	sucrose nonfermenting-like protein	STRINGENT	STRINGENT	STRINGENT	YES	NO	YES	YES	3'UTR	3'UTR	NO	3'UTR	Stop codon	3'UTR
AT1G09130	F4HZE0, Q8L770	AT1G09130		ATP-dependent caseinolytic (Clp) protease/crotonase family protein	STRINGENT	STRINGENT	STRINGENT	YES	YES	YES	YES	3'UTR,CDS,3'UTR,3'UTR	NO	3'UTR, CDS	3'UTR, CDS, 5'UTR	Stop codon	3'UTR
AT1G09150	Q8L7N2	AT1G09150		pseudouridine synthase and archaeosine transglycosylase (PUA) domain-containing protein	STRINGENT	STRINGENT	STRINGENT	YES	YES	YES	YES	3'UTR	NO	3'UTR	3'UTR	Stop codon	3'UTR
AT1G09210	Q38858	CRT1b	AtCRT1b, CRT1b, CRT2	calreticulin 1b	STRINGENT	STRINGENT	STRINGENT	YES	YES	YES	YES	3'UTR	NO	3'UTR	3'UTR	Stop codon	NO
AT1G09330	A0A1P8ANI1, Q8LEK2	AT1G09330	ECH	golgi apparatus membrane protein-like protein ECHIDNA protein	STRINGENT	N.A.	STRINGENT	NO	NO	YES	NO	3'UTR,3'UTR	NO	3'UTR	3'UTR	NO	3'UTR
AT1G09340	A0A1P8ATL2, Q9SA52	CRB	CRB, CSP41B, HIP1.3	chloroplast RNA binding protein	STRINGENT	STRINGENT	STRINGENT	YES	YES	YES	YES	3'UTR,3'UTR	NO	CDS, 3'UTR	3'UTR, CDS	Stop codon	NO
AT1G09430	O80526	ACLA-3	ACLA-3	ATP-citrate lyase A-3	STRINGENT	STRINGENT	STRINGENT	YES	YES	YES	YES	3'UTR	NO	3'UTR	3'UTR	3' UTR	3'UTR
AT1G09570	A0A1P8AVD9, P14712, P14712-2	PHYA	FHY2, FRE1, HY8, PHYA	phytochrome A	STRINGENT	STRINGENT	STRINGENT	YES	NO	YES	YES	3'UTR,3'UTR,3'UTR,3'UTR,3'UTR,3'UTR	NO	3'UTR	3'UTR	Stop codon	NO
AT1G09590	Q43291	AT1G09590		Translation protein SH3-like family protein	STRINGENT	STRINGENT	STRINGENT	YES	YES	YES	YES	3'UTR	NO	3'UTR	3'UTR	Stop codon	3'UTR
AT1G09640	C0Z2L8, O04487	AT1G09640		Translation elongation factor EF1B, gamma chain	STRINGENT	STRINGENT	STRINGENT	YES	YES	YES	YES	3'UTR,3'UTR,3'UTR	NO	3'UTR	3'UTR	3' UTR	NO
AT1G09690	Q43291	AT1G09690		Translation protein SH3-like family protein	STRINGENT	STRINGENT	STRINGENT	YES	YES	YES	YES	3'UTR	NO	3'UTR	3'UTR	Stop codon	NO
AT1G09740	Q84TF6	AT1G09740		Adenine nucleotide alpha hydrolases-like superfamily protein	STRINGENT	STRINGENT	STRINGENT	YES	YES	YES	YES	3'UTR,3'UTR	3'UTR	NO	3'UTR	NO	3'UTR
AT1G09760	P43333	U2A'	U2A'	U2 small nuclear ribonucleoprotein A	STRINGENT	STRINGENT	STRINGENT	YES	YES	YES	YES	3'UTR	3'UTR	3'UTR	3'UTR	3' UTR	NO
AT1G09780	O04499	iPGAM1	iPGAM1	Phosphoglycerate mutase, 2,3-bisphosphoglycerate-independent	STRINGENT	N.A.	STRINGENT	NO	NO	YES	YES	3'UTR	NO	3'UTR	3'UTR	NO	NO
AT1G10590	Q93W05, Q9XIJ0	AT1G10590		Nucleic acid-binding, OB-fold-like protein	STRINGENT	STRINGENT	STRINGENT	YES	YES	YES	YES	3'UTR,3'UTR,3'UTR	NO	3'UTR	3'UTR	3' UTR	NO
AT1G10630	Q6ID97	ARFA1F	ARFA1F, ATARFA1F	ADP-ribosylation factor A1F	STRINGENT	STRINGENT	STRINGENT	YES	YES	YES	YES	3'UTR,3'UTR	NO	3'UTR	3'UTR	Stop codon	3'UTR
AT1G10670	F4I5V8, Q9SGY2	ACLA-1	ACLA-1	ATP-citrate lyase A-1	STRINGENT	STRINGENT	STRINGENT	YES	YES	YES	YES	3'UTR,3'UTR,3'UTR,3'UTR	NO	3'UTR	3'UTR	Stop codon	3'UTR
AT1G10840	Q9C5Z2, Q9C5Z2-2	TIF3H1	TIF3H1	translation initiation factor 3 subunit H1	STRINGENT	STRINGENT	STRINGENT	YES	YES	YES	YES	3'UTR,3'UTR	3'UTR	3'UTR	3'UTR, CDS	Stop codon	3'UTR
AT1G10865	B3H4R5, Q8GWM1	AT1G10865		cytochrome C oxidase assembly factor	STRINGENT	STRINGENT	STRINGENT	YES	NO	YES	NO	3'UTR,3'UTR	NO	3'UTR	NO	NO	3'UTR
AT1G10950	A0A178WKJ8, Q940G0	TMN1	AtTMN1, EMP12, TMN1	transmembrane nine 1	STRINGENT	STRINGENT	STRINGENT	YES	YES	YES	YES	3'UTR	NO	3'UTR	3'UTR	Stop codon, 3' UTR	3'UTR
AT1G11430	Q9LPZ1	MORF9	MORF9, RIP9	plastid developmental protein DAG	STRINGENT	STRINGENT	STRINGENT	YES	YES	YES	NO	3'UTR	NO	CDS, 3'UTR	3'UTR	Stop codon	3'UTR
AT1G11475	Q8LFJ6	NRPB10	NRPB10, NRPD10, NRPE10	RNA polymerases N / 8 kDa subunit	STRINGENT	STRINGENT	STRINGENT	YES	NO	YES	YES	3'UTR	NO	3'UTR	3'UTR	Stop codon	3'UTR
AT1G11650	Q9SAB3, Q9SAB3-2, Q9SAB3-3	RBP45B	ATRBP45B, RBP45B	RNA-binding (RRM/RBD/RNP motifs) family protein	STRINGENT	STRINGENT	STRINGENT	YES	YES	YES	YES	3'UTR,3'UTR	NO	3'UTR	3'UTR, CDS	3' UTR	3'UTR
AT1G11840	O65398, O65398-2, O65398-3	GLX1	ATGLX1, AtGLYI3, GLX1	glyoxalase/bleomycin resistance protein/dioxygenase superfamily protein	STRINGENT	STRINGENT	STRINGENT	YES	YES	YES	YES	3'UTR,3'UTR,3'UTR,3'UTR,3'UTR,3'UTR	NO	3'UTR	3'UTR	coding_intron, Stop codon	NO
AT1G11860	A0A2H1ZEA9, O65396	AT1G11860		Glycine cleavage T-protein family	STRINGENT	STRINGENT	STRINGENT	YES	YES	YES	YES	CDS,CDS,CDS,3'UTR,3'UTR,3'UTR	NO	3'UTR	3'UTR, CDS, 5'UTR	Stop codon	NO
AT1G11890	Q94AU2	SEC22	ATSEC22, SEC22	Synaptobrevin family protein	STRINGENT	STRINGENT	STRINGENT	YES	NO	YES	YES	3'UTR	NO	3'UTR	3'UTR	3' UTR	3'UTR
AT1G11910	A0A1P8AV08, O65390, Q56YW8, Q56Z71	APA1	APA1, ATAPA1, AtPaspA1, PaspA1	aspartic proteinase A1	STRINGENT	STRINGENT	STRINGENT	YES	YES	YES	YES	3'UTR,3'UTR	NO	3'UTR	3'UTR	Stop codon	NO
AT1G12000	Q8W4M5	AT1G12000		Phosphofructokinase family protein	STRINGENT	STRINGENT	STRINGENT	YES	YES	YES	YES	3'UTR	3'UTR	3'UTR	3'UTR	Stop codon	3'UTR
AT1G12230	F4IC59, Q56WS4, Q9FWX0	AT1G12230		Aldolase superfamily protein	STRINGENT	STRINGENT	STRINGENT	YES	YES	YES	YES	3'UTR,3'UTR	NO	3'UTR	3'UTR	Stop codon	3'UTR
AT1G12270	Q9LNB6	Hop1	Hop1	stress-inducible protein	STRINGENT	N.A.	STRINGENT	NO	NO	YES	NO	3'UTR	3'UTR	NO	3'UTR	Stop codon	3'UTR
AT1G12310	Q94AZ4	AT1G12310		Calcium-binding EF-hand family protein	STRINGENT	STRINGENT	STRINGENT	NO	YES	YES	YES	3'UTR	NO	3'UTR	NO	NO	NO
AT1G12360	Q9C5X3	KEU	KEU, SEC11	Sec1/munc18-like (SM) proteins superfamily	STRINGENT	STRINGENT	STRINGENT	YES	NO	YES	NO	3'UTR	NO	3'UTR	3'UTR	Stop codon	3'UTR
AT1G12410	Q9XJ36	2	CLP2, CLPR2, EMB3146, NCLPP2	CLP protease proteolytic subunit 2	STRINGENT	STRINGENT	STRINGENT	YES	YES	NO	YES	3'UTR	3'UTR	3'UTR	3'UTR	Stop codon	3'UTR
AT1G12470	F4IDS7	AT1G12470	VPS18	zinc ion binding protein	STRINGENT	N.A.	STRINGENT	NO	NO	YES	NO	3'UTR	3'UTR	NO	3'UTR	Stop codon	3'UTR
AT1G12760	B9DH70, Q9LN71	AT1G12760		Zinc finger, C3HC4 type (RING finger) family protein	STRINGENT	N.A.	STRINGENT	NO	NO	YES	NO	3'UTR,3'UTR	NO	3'UTR	3'UTR	NO	3'UTR
AT1G12800	Q94AJ9	AT1G12800	SDP	Nucleic acid-binding, OB-fold-like protein	STRINGENT	STRINGENT	STRINGENT	YES	YES	YES	NO	3'UTR	NO	3'UTR	3'UTR	NO	NO
AT1G12840	Q9SDS7	DET3	ATVHA-C, DET3	vacuolar ATP synthase subunit C (VATC) / V-ATPase C subunit / vacuolar proton pump C subunit (DET3)	STRINGENT	STRINGENT	STRINGENT	YES	YES	YES	YES	3'UTR	NO	3'UTR	3'UTR	3' UTR	3'UTR
AT1G12920	Q9LPV8	ERF1-2	ERF1-2	eukaryotic release factor 1-2	STRINGENT	STRINGENT	STRINGENT	YES	YES	YES	YES	3'UTR	NO	3'UTR	3'UTR	NO	NO
AT1G13060	F4HP14, O23717	PBE1	PBE1	20S proteasome beta subunit E1	STRINGENT	STRINGENT	STRINGENT	YES	YES	YES	YES	3'UTR,3'UTR,3'UTR	NO	3'UTR	3'UTR	Stop codon	3'UTR
AT1G13440	F4HQT1, Q56WJ4, Q9FX54	GAPC2	GAPC-2, GAPC2	glyceraldehyde-3-phosphate dehydrogenase C2	STRINGENT	STRINGENT	STRINGENT	YES	YES	YES	YES	3'UTR,3'UTR	NO	3'UTR	3'UTR, 5'UTR, CDS	NO	NO
AT1G13560	A0A1P8AWM4, F4HQU9, O82567	AAPT1	AAPT1, ATAAPT1	aminoalcoholphosphotransferase 1	STRINGENT	STRINGENT	STRINGENT	YES	YES	YES	YES	3'UTR,3'UTR,3'UTR	NO	3'UTR	3'UTR	Stop codon	3'UTR
AT1G14270	A0A178WH42, F4HUI0, Q8RX00	AT1G14270		CAAX amino terminal protease family protein	STRINGENT	STRINGENT	N.A.	YES	YES	NO	NO	3'UTR,3'UTR,3'UTR,3'UTR	NO	3'UTR	3'UTR	NO	3'UTR
AT1G14320	A0A2H1ZEB8, Q93VT9, Q93VT9-2	SAC52	RPL10, RPL10A, SAC52	Ribosomal protein L16p/L10e family protein	STRINGENT	STRINGENT	STRINGENT	YES	YES	YES	YES	3'UTR,3'UTR	NO	3'UTR	3'UTR	NO	NO
AT1G14400	P25865	UBC1	ATUBC1, UBC1	ubiquitin carrier protein 1	STRINGENT	STRINGENT	STRINGENT	YES	YES	YES	YES	3'UTR,3'UTR	NO	3'UTR	3'UTR	Stop codon	3'UTR
AT1G14450	A0A1P8ATJ4, Q9M9R9	AT1G14450		NADH dehydrogenase (ubiquinone)s	STRINGENT	STRINGENT	STRINGENT	YES	YES	YES	YES	3'UTR,3'UTR	3'UTR	3'UTR	3'UTR	Stop codon	3'UTR
AT1G14610	P93736	TWN2	TWN2, VALRS	valyl-tRNA synthetase / valine-tRNA ligase (VALRS)	STRINGENT	STRINGENT	STRINGENT	YES	YES	YES	YES	3'UTR	NO	3'UTR	3'UTR	Stop codon	3'UTR
AT1G14830	Q8LF21	DL1C	ADL1C, ADL5, DL1C, DRP1C	DYNAMIN-like 1C	STRINGENT	STRINGENT	STRINGENT	YES	NO	YES	YES	3'UTR	3'UTR	3'UTR	3'UTR	Stop codon	3'UTR
AT1G14980	A0A1P8AUX7, P34893	CPN10	CPN10	chaperonin 10	STRINGENT	STRINGENT	STRINGENT	YES	YES	YES	YES	3'UTR,3'UTR	NO	3'UTR	3'UTR	Stop codon	3'UTR
AT1G15120	F4HXY8, Q0WWE3	AT1G15120		Ubiquinol-cytochrome C reductase hinge protein	STRINGENT	STRINGENT	STRINGENT	YES	YES	YES	YES	3'UTR,3'UTR	NO	3'UTR	3'UTR, CDS	Stop codon	3'UTR
AT1G15140	F4HXZ3, Q9XI55	AT1G15140	FNRL	FAD/NAD(P)-binding oxidoreductase	STRINGENT	STRINGENT	N.A.	YES	NO	NO	NO	3'UTR,3'UTR,3'UTR	3'UTR	3'UTR, CDS	3'UTR, CDS	Stop codon	3'UTR
AT1G15270	Q9XI42	AT1G15270		Translation machinery associated TMA7	STRINGENT	STRINGENT	STRINGENT	YES	YES	YES	YES	3'UTR	3'UTR	3'UTR	3'UTR	Stop codon	3'UTR
AT1G15340	Q9XI36, Q9XI36-2	MBD10	MBD10	methyl-CPG-binding domain 10	STRINGENT	STRINGENT	N.A.	YES	YES	NO	NO	3'UTR,3'UTR	NO	3'UTR, CDS	3'UTR	Stop codon, CDS	3'UTR
AT1G15500	P92935	ATNTT2	ATNTT2	TLC ATP/ADP transporter	STRINGENT	STRINGENT	STRINGENT	YES	YES	YES	YES	3'UTR	3'UTR	CDS, 3'UTR	3'UTR	Stop codon	3'UTR
AT1G15690	A8MQH1, P31414	AVP1	AtAVP1, ATAVP3, AtVHP1;1, AVP-3, AVP1, FUGU5, VHP1	Inorganic H pyrophosphatase family protein	STRINGENT	STRINGENT	STRINGENT	YES	YES	YES	YES	3'UTR,3'UTR	NO	3'UTR	3'UTR, 5'UTR	Stop codon	NO
AT1G15750	Q94AI7	TPL	TPL, WSIP1	Transducin family protein / WD-40 repeat family protein	STRINGENT	STRINGENT	STRINGENT	YES	YES	YES	YES	3'UTR,3'UTR,3'UTR,3'UTR	3'UTR	3'UTR	3'UTR	NO	3'UTR
AT1G15820	Q9LMQ2, Q9XF90	LHCB6	CP24, LHCB6	light harvesting complex photosystem II subunit 6	STRINGENT	STRINGENT	N.A.	YES	NO	NO	NO	CDS,3'UTR	NO	3'UTR	5'UTR, 3'UTR, CDS	NO	NO
AT1G15880	Q9LMP7	GOS11	atgos11, GOS11	golgi snare 11	STRINGENT	N.A.	STRINGENT	NO	NO	YES	YES	3'UTR	CDS, StopCodon	3'UTR	3'UTR	3' UTR	3'UTR
AT1G15930	Q9S9P1	AT1G15930		Ribosomal protein L7Ae/L30e/S12e/Gadd45 family protein	STRINGENT	STRINGENT	STRINGENT	YES	YES	YES	YES	5'UTR,5'UTR,5'UTR,3'UTR,3'UTR	StartCodon, 5'UTR	3'UTR	3'UTR	Stop codon	3'UTR
AT1G15950	A0A1P8ASX1, A0A1P8ASX3, A0A1P8ASX8, A0A1P8AT30, A8MQW5, Q9S9N9	CCR1	ATCCR1, CCR1, IRX4	cinnamoyl coa reductase 1	STRINGENT	STRINGENT	STRINGENT	YES	YES	YES	YES	3'UTR,3'UTR	NO	3'UTR	3'UTR	Stop codon	3'UTR
AT1G16080	C0Z2K9, Q9S9M7	AT1G16080		nuclear protein	STRINGENT	STRINGENT	N.A.	YES	YES	NO	NO	3'UTR	NO	3'UTR	3'UTR	Stop codon	NO
AT1G16180	Q9S9L9	AT1G16180		Serinc-domain containing serine and sphingolipid biosynthesis protein	STRINGENT	N.A.	STRINGENT	NO	NO	YES	YES	3'UTR,3'UTR	NO	3'UTR	3'UTR, CDS	NO	NO
AT1G16240	A8MRW0, Q9SA23	51	ATSYP51, SYP51	syntaxin of plants 51	STRINGENT	N.A.	STRINGENT	NO	NO	YES	YES	3'UTR,3'UTR,3'UTR,3'UTR	3'UTR	3'UTR	3'UTR	Stop codon	3'UTR
AT1G16460	A0A178W5B2, A0A1P8AU81, A0A1P8AU99, Q24JL3, Q24JL3-2	RDH2	ATMST2, ATRDH2, MST2, RDH2, ST2, STR2	rhodanese homologue 2	STRINGENT	STRINGENT	STRINGENT	YES	YES	YES	YES	3'UTR,3'UTR,3'UTR,3'UTR,3'UTR,3'UTR	NO	NO	3'UTR	Stop codon	NO
AT1G16610	A0A178W7W5, A0A178W7Y0, A0A1P8APW3, A0A1P8APZ4, A0A1P8APZ9, Q9SEE9, Q9SEE9-2, Q9SEE9-3	SR45	AtSR45, RNPS1, SR45	arginine/serine-rich 45	STRINGENT	STRINGENT	STRINGENT	YES	YES	YES	YES	3'UTR,3'UTR,3'UTR,3'UTR,3'UTR,3'UTR,3'UTR,3'UTR,3'UTR,3'UTR,3'UTR,3'UTR,3'UTR	NO	3'UTR	3'UTR	Stop codon	3'UTR
AT1G16700	Q9FX83	AT1G16700		Alpha-helical ferredoxin	STRINGENT	STRINGENT	STRINGENT	YES	YES	YES	YES	3'UTR	3'UTR	3'UTR	3'UTR	Stop codon	NO
AT1G16720	A0A1P8AWU9, A0A1P8AWY1, Q8W4D6	HCF173	HCF173	high chlorophyll fluorescence phenotype 173	STRINGENT	STRINGENT	STRINGENT	YES	NO	YES	NO	3'UTR	StartCodon	3'UTR	3'UTR	Stop codon	3'UTR
AT1G16810	A0A178WL35, Q9FZ43	AT1G16810		7-dehydrocholesterol reductase-like protein	STRINGENT	STRINGENT	STRINGENT	YES	YES	YES	YES	3'UTR,3'UTR	NO	CDS, 3'UTR	3'UTR, CDS	NO	NO
AT1G16880	F4I613, Q9FZ47	ACR11	ACR11	uridylyltransferase-like protein	STRINGENT	STRINGENT	STRINGENT	YES	YES	YES	YES	3'UTR	5'UTR, CDS	3'UTR	3'UTR, CDS	Stop codon	3'UTR
AT1G16890	A0A178WJZ0, F4I615, Q9FZ48, Q9FZ48-2	UBC36	AtUBC36, UBC13B, UBC36	ubiquitin-conjugating enzyme 36	STRINGENT	STRINGENT	STRINGENT	YES	YES	YES	YES	3'UTR,3'UTR,3'UTR	NO	3'UTR	3'UTR	Stop codon	NO
AT1G16920	Q39222	RABA1b	ATRABA1B, BEX5, RAB11, RABA1b	RAB GTPase homolog A1B	STRINGENT	STRINGENT	STRINGENT	YES	YES	YES	YES	3'UTR	NO	3'UTR	3'UTR	Stop codon	NO
AT1G17050	Q76FS5	SPS2	AtSPS2, SPS2	solanesyl diphosphate synthase 2	STRINGENT	STRINGENT	N.A.	YES	NO	NO	NO	3'UTR	NO	3'UTR	3'UTR	Stop codon	3'UTR
AT1G17080	A0A178WBW9, Q9SHG7	AT1G17080		Ribosomal protein L18ae family	STRINGENT	STRINGENT	STRINGENT	YES	NO	YES	YES	3'UTR	NO	3'UTR	3'UTR	NO	3'UTR
AT1G17220	Q9SHI1	FUG1	FUG1	Translation initiation factor 2, small GTP-binding protein	STRINGENT	STRINGENT	STRINGENT	YES	NO	YES	NO	3'UTR	NO	CDS, 3'UTR	3'UTR	NO	3'UTR
AT1G17290	F4I7I0	AlaAT1	AlaAT1	alanine aminotransferas	STRINGENT	STRINGENT	STRINGENT	YES	NO	YES	YES	3'UTR	CDS	3'UTR	3'UTR	Stop codon	3'UTR
AT1G17370	A0A178WAI1, B3H4Q3, Q9LQI9	UBP1B	UBP1B	oligouridylate binding protein 1B	STRINGENT	STRINGENT	STRINGENT	YES	NO	YES	YES	3'UTR,3'UTR	NO	NO	3'UTR	NO	3'UTR
AT1G17470	Q9LQK0	DRG1	ATDRG, ATDRG1, DRG1, Drg1-2	developmentally regulated G-protein 1	STRINGENT	STRINGENT	STRINGENT	YES	NO	YES	YES	3'UTR,3'UTR	NO	3'UTR	3'UTR	Stop codon	3'UTR
AT1G17880	Q9SMW7	BTF3	ATBTF3, BTF3	basic transcription factor 3	STRINGENT	STRINGENT	STRINGENT	YES	YES	YES	YES	3'UTR	NO	3'UTR	3'UTR	Stop codon	NO
AT1G18070	Q8L835, Q9LMS7	AT1G18070		Translation elongation factor EF1A/initiation factor IF2gamma family protein	STRINGENT	STRINGENT	STRINGENT	YES	YES	YES	YES	3'UTR,3'UTR,3'UTR	NO	3'UTR	3'UTR	3' UTR	3'UTR
AT1G18080	O24456, O24456-2	ATARCA	ATARCA, AtRACK1, RACK1A, RACK1A_AT, SAC53	Transducin/WD40 repeat-like superfamily protein	STRINGENT	STRINGENT	STRINGENT	YES	YES	YES	YES	3'UTR	NO	3'UTR	3'UTR, 5'UTR	Stop codon	NO
AT1G18540	C0Z2S4, Q9FZ76	AT1G18540		Ribosomal protein L6 family protein	STRINGENT	STRINGENT	STRINGENT	YES	YES	YES	YES	CDS,3'UTR	NO	3'UTR	3'UTR, CDS	Stop codon	NO
AT1G18720	Q9M9U3	AT1G18720		ER membrane protein, putative (DUF962)	STRINGENT	N.A.	STRINGENT	NO	NO	YES	YES	3'UTR,3'UTR	NO	3'UTR	3'UTR	Stop codon	3'UTR
AT1G19000	Q9LMC7	AT1G19000		Homeodomain-like superfamily protein	STRINGENT	STRINGENT	STRINGENT	YES	NO	YES	NO	3'UTR,3'UTR	3'UTR	3'UTR	3'UTR	NO	NO
AT1G19660	A0A1P8AVM3, Q93VH2	AT1G19660	AtBBD2, BBD2	Wound-responsive family protein	STRINGENT	STRINGENT	STRINGENT	YES	YES	YES	YES	3'UTR,3'UTR,3'UTR	NO	3'UTR	3'UTR	3' UTR	3'UTR
AT1G19910	A0A1P8AQP0, P59228	AVA-P2	ATVHA-C2, AVA-2PE, AVA-P2	ATPase, F0/V0 complex, subunit C protein	STRINGENT	STRINGENT	STRINGENT	YES	YES	YES	YES	5'UTR,5'UTR,CDS,CDS,3'UTR,3'UTR	NO	3'UTR	3'UTR	Stop codon	3'UTR
AT1G19920	Q43870, Q43870-2	APS2	APS2, ASA1, ATPS2	Pseudouridine synthase/archaeosine transglycosylase-like family protein	STRINGENT	STRINGENT	STRINGENT	YES	NO	YES	NO	3'UTR	NO	3'UTR	3'UTR	NO	3'UTR
AT1G20010	P29513	TUB5	TUB5	tubulin beta-5 chain	STRINGENT	N.A.	STRINGENT	NO	NO	YES	NO	3'UTR	NO	3'UTR	3'UTR	Stop codon	NO
AT1G20020	C0Z2A8, Q8W493, Q8W493-2, Q8W493-3	FNR2	ATLFNR2, FNR2, LFNR2	ferredoxin-NADP[ ]-oxidoreductase 2	STRINGENT	STRINGENT	N.A.	YES	YES	NO	NO	3'UTR,3'UTR,3'UTR	NO	3'UTR	3'UTR, 5'UTR, CDS	NO	NO
AT1G20090	Q38919	ROP2	ARAC4, ATRAC4, ATROP2, ROP2	RHO-related protein from plants 2	STRINGENT	STRINGENT	STRINGENT	YES	YES	YES	NO	3'UTR	NO	3'UTR	3'UTR	3' UTR	3'UTR
AT1G20110	Q9ASS2	AT1G20110	FREE1, FYVE1	RING/FYVE/PHD zinc finger superfamily protein	STRINGENT	STRINGENT	STRINGENT	YES	NO	YES	YES	3'UTR	NO	3'UTR	3'UTR	CDS, Stop codon	3'UTR
AT1G20200	Q9LNU4	EMB2719	EMB2719, HAP15	PAM domain (PCI/PINT associated module) protein	STRINGENT	STRINGENT	STRINGENT	YES	NO	YES	YES	3'UTR	NO	3'UTR	3'UTR	Stop codon	NO
AT1G20220	Q944A2, Q9LNU5	AT1G20220		Alba DNA/RNA-binding protein	STRINGENT	STRINGENT	STRINGENT	YES	NO	YES	YES	3'UTR	NO	3'UTR	3'UTR	CDS, coding_intron	3'UTR
AT1G20260	Q680Z0, Q683E8, Q8W4E2	VAB3	AtVAB3, VAB3	ATPase, V1 complex, subunit B protein	STRINGENT	STRINGENT	STRINGENT	YES	YES	YES	YES	3'UTR	NO	3'UTR	3'UTR	3' UTR	3'UTR
AT1G20340	P42699	DRT112	DRT112, PETE2	Cupredoxin superfamily protein	STRINGENT	STRINGENT	N.A.	YES	YES	NO	NO	3'UTR	NO	3'UTR	5'UTR, 3'UTR, CDS	NO	NO
AT1G20620	A0A1P8AWR0, A0A1P8AWT7, B9DG18, F4HUL6, Q2V4M4, Q42547	CAT3	ATCAT3, CAT3, SEN2	catalase 3	STRINGENT	STRINGENT	STRINGENT	YES	NO	YES	YES	3'UTR,3'UTR,3'UTR,3'UTR,3'UTR,3'UTR	NO	3'UTR	3'UTR, 5'UTR, CDS	NO	NO
AT1G20693	A0A178WNE2, O49596, O49596-2, O49596-3	HMGB2	HMG BETA 1, HMGB2, NFD02, NFD2	high mobility group B2	STRINGENT	STRINGENT	STRINGENT	YES	YES	YES	YES	3'UTR,3'UTR,3'UTR	NO	3'UTR	3'UTR, 5'UTR, CDS	3' UTR	NO
AT1G20810	A0A1P8APZ5, Q9LM71	AT1G20810		FKBP-like peptidyl-prolyl cis-trans isomerase family protein	STRINGENT	STRINGENT	N.A.	YES	NO	NO	NO	3'UTR,3'UTR	3'UTR	3'UTR	3'UTR	Stop codon	3'UTR
AT1G20950	Q9SYP2	AT1G20950		Phosphofructokinase family protein	STRINGENT	STRINGENT	STRINGENT	YES	NO	YES	YES	3'UTR	NO	3'UTR	3'UTR	NO	3'UTR
AT1G20960	Q9SYP1	emb1507	BRR2, emb1507	U5 small nuclear ribonucleoprotein helicase	STRINGENT	STRINGENT	STRINGENT	YES	NO	YES	YES	3'UTR,3'UTR,3'UTR	3'UTR	3'UTR	3'UTR	3' UTR	3'UTR
AT1G21065	Q9LPU1	AT1G21065		secondary thiamine-phosphate synthase enzyme	STRINGENT	STRINGENT	STRINGENT	YES	YES	YES	YES	3'UTR	NO	3'UTR	3'UTR, CDS	Stop codon	3'UTR
AT1G21500	C0Z3H5, Q9LPK9	AT1G21500		hypothetical protein	STRINGENT	STRINGENT	N.A.	NO	YES	NO	NO	3'UTR	NO	3'UTR	3'UTR, CDS	NO	NO
AT1G21630	A0A178WKM1, A0A1P8APZ6, A0A1P8AQ08, F4HY32	AT1G21630	AtEH2	Calcium-binding EF hand family protein	STRINGENT	STRINGENT	STRINGENT	YES	NO	YES	NO	3'UTR,3'UTR,3'UTR,3'UTR	3'UTR	3'UTR	3'UTR	NO	NO
AT1G21640	F4HY34, Q9C5W3	NADK2	ATNADK2, NADK2	NAD kinase 2	STRINGENT	STRINGENT	STRINGENT	YES	YES	YES	YES	3'UTR,3'UTR	3'UTR	3'UTR	3'UTR	Stop codon	3'UTR
AT1G21660	C0Z254, Q9XI12	AT1G21660	AUXILIN-LIKE3	Chaperone DnaJ-domain superfamily protein	STRINGENT	N.A.	STRINGENT	NO	NO	YES	NO	3'UTR	3'UTR	NO	3'UTR	NO	3'UTR
AT1G21720	Q9XI05, Q9XI05-2	PBC1	PBC1	proteasome beta subunit C1	STRINGENT	STRINGENT	STRINGENT	YES	YES	YES	YES	3'UTR	NO	3'UTR	3'UTR	Stop codon	3'UTR
AT1G21770	Q8GXW2, Q8H0Y9, Q9XHZ9	AT1G21770		Acyl-CoA N-acyltransferases (NAT) superfamily protein	STRINGENT	N.A.	STRINGENT	NO	NO	YES	NO	3'UTR	3'UTR	NO	NO	NO	NO
AT1G21930	Q84VW7	AT1G21930		transmembrane protein	STRINGENT	STRINGENT	STRINGENT	YES	YES	YES	YES	3'UTR	3'UTR	3'UTR	NO	Stop codon	3'UTR
AT1G22300	B9DFR1, F4I1C1, P48347, P48347-2	GRF10	14-3-3EPSILON, GF14 EPSILON, GRF10	general regulatory factor 10	STRINGENT	STRINGENT	STRINGENT	YES	YES	YES	YES	3'UTR,3'UTR,3'UTR	NO	3'UTR	3'UTR	3' UTR	3'UTR
AT1G22410	Q9SK84	AT1G22410		Class-II DAHP synthetase family protein	STRINGENT	STRINGENT	STRINGENT	YES	YES	YES	YES	3'UTR	NO	3'UTR	3'UTR	Stop codon	3'UTR
AT1G22450	Q9S7L9	COX6B	ATCOX6B2, COX6B	cytochrome C oxidase 6B	STRINGENT	STRINGENT	STRINGENT	YES	YES	YES	YES	3'UTR	NO	3'UTR	3'UTR	Stop codon	3'UTR
AT1G22520	F4I1E5, Q8LAJ9	AT1G22520		MICOS complex subunit Mic10-like protein (DUF543)	STRINGENT	STRINGENT	STRINGENT	YES	YES	YES	YES	3'UTR	NO	3'UTR, CDS	3'UTR, CDS	NO	3'UTR, CDS
AT1G22750	F4I2Z8, O64379, Q7DLS5, Q949W5	AT1G22750		transmembrane protein	STRINGENT	STRINGENT	STRINGENT	YES	NO	YES	YES	3'UTR,3'UTR,3'UTR,3'UTR	5'UTR	3'UTR	3'UTR	NO	3'UTR
AT1G22780	P34788	PFL	PFL, PFL1, RPS18A	Ribosomal protein S13/S18 family	STRINGENT	STRINGENT	STRINGENT	YES	YES	YES	YES	3'UTR	NO	3'UTR	3'UTR	NO	3'UTR
AT1G22840	B3H4Y9, O23138	CYTC-1	ATCYTC-A, CYTC-1	CYTOCHROME C-1	STRINGENT	STRINGENT	STRINGENT	YES	YES	YES	YES	3'UTR,3'UTR	NO	3'UTR	3'UTR	CDS, 3' UTR	NO
AT1G22850	A0A178WN44, A0A1P8AUK8, O23137	AT1G22850		SNARE associated Golgi protein family	STRINGENT	STRINGENT	N.A.	YES	NO	NO	NO	3'UTR	3'UTR	3'UTR	3'UTR	Stop codon	3'UTR
AT1G23190	O49299, Q56X28	PGM3	PGM3	Phosphoglucomutase/phosphomannomutase family protein	STRINGENT	STRINGENT	STRINGENT	YES	NO	YES	YES	3'UTR	NO	3'UTR	3'UTR	Stop codon	3'UTR
AT1G23260	A0A178W8R0, A0A1P8AND1, Q93YP0	MMZ1	MMZ1, UEV1A	MMS ZWEI homologue 1	STRINGENT	N.A.	STRINGENT	NO	NO	YES	NO	3'UTR,3'UTR	3'UTR	3'UTR	3'UTR	Stop codon	3'UTR
AT1G23290	Q9LR33	RPL27AB	RPL27A, RPL27AB	Ribosomal protein L18e/L15 superfamily protein	STRINGENT	STRINGENT	STRINGENT	YES	YES	YES	YES	3'UTR	NO	3'UTR	3'UTR, 5'UTR	NO	NO
AT1G23310	Q9LR30, Q9LR30-2	GGT1	AOAT1, GGAT1, GGT1	glutamate:glyoxylate aminotransferase	STRINGENT	STRINGENT	STRINGENT	YES	YES	YES	YES	3'UTR,3'UTR	NO	3'UTR	3'UTR, CDS, 5'UTR	Stop codon	NO
AT1G23490	Q9LQC8	ARF1	ARF1, ATARF, ATARF1, ATARFA1A	ADP-ribosylation factor 1	STRINGENT	STRINGENT	STRINGENT	YES	YES	YES	YES	3'UTR	NO	3'UTR	3'UTR	Stop codon	NO
AT1G24050	C0Z3I7, Q8L466	AT1G24050		RNA-processing, Lsm domain-containing protein	STRINGENT	STRINGENT	STRINGENT	YES	YES	YES	YES	3'UTR	3'UTR	CDS, 3'UTR	3'UTR	3' UTR	3'UTR
AT1G24180	Q8H1Y0	IAR4	IAR4	Thiamin diphosphate-binding fold (THDP-binding) superfamily protein	STRINGENT	STRINGENT	STRINGENT	YES	NO	YES	YES	3'UTR	3'UTR, StopCodon	3'UTR	3'UTR	Stop codon	3'UTR
AT1G24360	P33207	AT1G24360		NAD(P)-binding Rossmann-fold superfamily protein	STRINGENT	STRINGENT	STRINGENT	YES	YES	YES	YES	3'UTR	NO	3'UTR	3'UTR, 5'UTR	Stop codon	3'UTR
AT1G24510	A0A1P8ARS7, O04450, O04450-2	AT1G24510		TCP-1/cpn60 chaperonin family protein	STRINGENT	STRINGENT	STRINGENT	YES	YES	YES	YES	CDS,CDS,CDS,3'UTR,3'UTR	NO	3'UTR, CDS	3'UTR, CDS	Stop codon	3'UTR, CDS
AT1G25260	Q94AK8	AT1G25260		Ribosomal protein L10 family protein	STRINGENT	STRINGENT	STRINGENT	YES	YES	YES	YES	3'UTR	3'UTR	3'UTR	3'UTR	Stop codon	3'UTR
AT1G25280	F4ICF2, Q9FRH7	TLP10	AtTLP10, TLP10	tubby like protein 10	STRINGENT	N.A.	STRINGENT	NO	NO	YES	NO	3'UTR,3'UTR	NO	3'UTR	3'UTR	NO	3'UTR
AT1G25520	Q9C6M1	AT1G25520		Uncharacterized protein family (UPF0016)	STRINGENT	N.A.	STRINGENT	NO	NO	NO	YES	3'UTR	3'UTR	3'UTR	3'UTR	NO	3'UTR
AT1G26110	Q9C658, Q9C658-2	DCP5	DCP5	decapping 5	STRINGENT	N.A.	STRINGENT	NO	NO	YES	YES	3'UTR,3'UTR	3'UTR	3'UTR	3'UTR	3' UTR	3'UTR
AT1G26550	Q9FE18	AT1G26550		FKBP-like peptidyl-prolyl cis-trans isomerase family protein	STRINGENT	STRINGENT	STRINGENT	YES	YES	YES	YES	3'UTR	5'UTR	3'UTR	3'UTR	Stop codon	3'UTR
AT1G26630	A0A178WD70, Q93VP3, Q93VP3-2	FBR12	ATELF5A-2, ELF5A-2, FBR12	Eukaryotic translation initiation factor 5A-1 (eIF-5A 1) protein	STRINGENT	STRINGENT	STRINGENT	YES	YES	YES	YES	5'UTR,5'UTR,3'UTR,3'UTR	NO	3'UTR	3'UTR, 5'UTR, CDS	Stop codon	NO
AT1G26670	Q8GX66, Q9SEL5	VTI1B	ATVTI12, VTI12, VTI1B	Vesicle transport v-SNARE family protein	STRINGENT	N.A.	STRINGENT	NO	NO	YES	NO	3'UTR	NO	3'UTR	3'UTR	NO	3'UTR
AT1G26850	B9DFI7, B9DFI7-2, F4HPE1, Q56ZN1	AT1G26850		S-adenosyl-L-methionine-dependent methyltransferases superfamily protein	STRINGENT	N.A.	STRINGENT	NO	NO	YES	YES	3'UTR,3'UTR,3'UTR	NO	3'UTR	3'UTR	Stop codon	NO
AT1G26880	A8MR50, Q42351	AT1G26880		Ribosomal protein L34e superfamily protein	STRINGENT	STRINGENT	STRINGENT	YES	YES	YES	YES	3'UTR,3'UTR	NO	3'UTR	3'UTR	Stop codon	NO
AT1G27000	Q9C5M5	AT1G27000		GRIP/coiled-coil protein, putative (DUF1664)	STRINGENT	STRINGENT	STRINGENT	YES	YES	YES	YES	3'UTR	NO	3'UTR	3'UTR	Stop codon	3'UTR
AT1G27090	Q9LFX8	AT1G27090		glycine-rich protein	STRINGENT	STRINGENT	STRINGENT	YES	YES	YES	YES	3'UTR	3'UTR	3'UTR	3'UTR	NO	NO
AT1G27310	Q9FZK4	NTF2A	NTF2A	nuclear transport factor 2A	STRINGENT	STRINGENT	STRINGENT	YES	YES	YES	YES	3'UTR	NO	3'UTR	3'UTR	Stop codon	3'UTR
AT1G27330	Q84K46, Q9FZK2	AT1G27330		Ribosome associated membrane protein RAMP4	STRINGENT	STRINGENT	STRINGENT	YES	NO	YES	YES	3'UTR	NO	NO	3'UTR	NO	3'UTR
AT1G27400	Q93VI3	AT1G27400		Ribosomal protein L22p/L17e family protein	STRINGENT	STRINGENT	STRINGENT	YES	YES	YES	YES	3'UTR	NO	3'UTR	3'UTR	Stop codon	3'UTR
AT1G27435	Q94F28	AT1G27435		hypothetical protein	STRINGENT	STRINGENT	STRINGENT	YES	YES	YES	YES	3'UTR	NO	3'UTR	3'UTR	NO	3'UTR
AT1G27450	F4HSX1, P31166, P31166-2	APT1	APT1, ATAPT1	adenine phosphoribosyl transferase 1	STRINGENT	STRINGENT	STRINGENT	YES	YES	YES	YES	3'UTR,3'UTR,3'UTR,3'UTR	NO	3'UTR	3'UTR	Stop codon	3'UTR
AT1G27530	Q9SXC8	AT1G27530		ubiquitin-fold modifier-conjugating enzyme	STRINGENT	STRINGENT	STRINGENT	YES	YES	YES	YES	3'UTR	NO	3'UTR	3'UTR	Stop codon	3'UTR
AT1G27970	A8MS55, Q8LC75, Q9C7F5	NTF2B	NTF2B	nuclear transport factor 2B	STRINGENT	STRINGENT	STRINGENT	YES	YES	YES	YES	CDS,CDS,3'UTR	3'UTR	3'UTR	3'UTR	NO	3'UTR
AT1G28120	Q8LG98	AT1G28120		ubiquitin thioesterase otubain-like protein	STRINGENT	STRINGENT	STRINGENT	YES	YES	YES	YES	3'UTR	NO	3'UTR	3'UTR	Stop codon	3'UTR
AT1G29070	Q9LP37	AT1G29070	PRPL34	Ribosomal protein L34	STRINGENT	STRINGENT	STRINGENT	YES	YES	YES	YES	3'UTR	NO	3'UTR	3'UTR	Stop codon	NO
AT1G29150	Q9LP45	9	ATS9, RPN6	non-ATPase subunit 9	STRINGENT	STRINGENT	STRINGENT	YES	YES	YES	YES	3'UTR,3'UTR	NO	3'UTR	3'UTR	NO	3'UTR
AT1G29250	Q9LP53	AT1G29250		Alba DNA/RNA-binding protein	STRINGENT	STRINGENT	STRINGENT	YES	YES	YES	YES	3'UTR	NO	3'UTR	3'UTR	Stop codon	3'UTR
AT1G29880	O23627, O23627-2	AT1G29880		glycyl-tRNA synthetase / glycine-tRNA ligase	STRINGENT	STRINGENT	STRINGENT	YES	YES	YES	YES	3'UTR	NO	3'UTR	3'UTR	Stop codon	3'UTR
AT1G29930	P04778	CAB1	AB140, CAB1, CAB140, LHCB1.3	chlorophyll A/B binding protein 1	STRINGENT	STRINGENT	N.A.	NO	YES	NO	NO	3'UTR	NO	3'UTR	5'UTR, 3'UTR, CDS	NO	NO
AT1G29990	Q2HIK4	PFD6	PFD6	prefoldin 6	STRINGENT	STRINGENT	STRINGENT	YES	YES	YES	YES	3'UTR	NO	3'UTR	3'UTR	NO	NO
AT1G30120	Q9C6Z3	PDH-E1 BETA	PDH-E1 BETA	pyruvate dehydrogenase E1 beta	STRINGENT	STRINGENT	STRINGENT	YES	NO	YES	NO	3'UTR	NO	3'UTR	3'UTR	Stop codon	NO
AT1G30230	A8MRC4, P48006	eEF-1Bb1	eEF-1Bb1, EF1Bb	translation elongation factor EF1B/ribosomal protein S6 family protein	STRINGENT	STRINGENT	STRINGENT	YES	YES	YES	YES	3'UTR,CDS,3'UTR,3'UTR	NO	3'UTR, CDS	3'UTR, CDS	Stop codon	NO
AT1G30380	C0Z280, Q9SUI5	PSAK	PSAK	photosystem I subunit K	STRINGENT	STRINGENT	STRINGENT	YES	YES	YES	YES	3'UTR	NO	CDS, 3'UTR	5'UTR, 3'UTR, CDS	NO	NO
AT1G30400	Q9C8G9	ABCC1	ABCC1, ATABCC1, ATMRP1, EST1, MRP1	multidrug resistance-associated protein 1	STRINGENT	STRINGENT	STRINGENT	YES	NO	YES	YES	3'UTR,3'UTR	3'UTR	CDS, 3'UTR	3'UTR	Stop codon	NO
AT1G30580	Q9SA73	AT1G30580	EngD-1	GTP binding protein	STRINGENT	STRINGENT	STRINGENT	YES	YES	YES	YES	3'UTR	NO	3'UTR	3'UTR	Stop codon	3'UTR
AT1G30630	Q9SA78	AT1G30630		Coatomer epsilon subunit	STRINGENT	STRINGENT	STRINGENT	YES	YES	YES	YES	3'UTR	NO	3'UTR	3'UTR	Stop codon	3'UTR
AT1G30880	A0A1P8ANI7, Q9FYH5	AT1G30880		hypothetical protein	STRINGENT	STRINGENT	STRINGENT	YES	YES	YES	YES	3'UTR,3'UTR	NO	3'UTR	3'UTR	Stop codon	3'UTR
AT1G31300	Q93Z82	AT1G31300		TRAM, LAG1 and CLN8 (TLC) lipid-sensing domain containing protein	STRINGENT	STRINGENT	STRINGENT	YES	YES	YES	YES	3'UTR,3'UTR,3'UTR	5'UTR	3'UTR	5'UTR, 3'UTR	Stop codon	3'UTR
AT1G31330	Q9SHE8	PSAF	PSAF	photosystem I subunit F	STRINGENT	STRINGENT	N.A.	NO	YES	NO	NO	3'UTR	NO	3'UTR	3'UTR, 5'UTR, CDS	NO	NO
AT1G31340	Q9SHE7	1	ATRUB1, NEDD8, RUB1	related to ubiquitin 1	STRINGENT	STRINGENT	STRINGENT	YES	YES	YES	YES	3'UTR	NO	3'UTR	3'UTR	NO	NO
AT1G31420	C0LGF4, F4I9D5	FEI1	FEI1	Leucine-rich repeat protein kinase family protein	STRINGENT	STRINGENT	STRINGENT	YES	YES	YES	YES	3'UTR,3'UTR,3'UTR	NO	3'UTR	3'UTR	3' UTR	3'UTR
AT1G31812	P57752	ACBP6	ACBP, ACBP6, AtACBP6	acyl-CoA-binding protein 6	STRINGENT	STRINGENT	STRINGENT	YES	YES	YES	YES	5'UTR,CDS,3'UTR	NO	3'UTR	3'UTR, CDS, 5'UTR	Stop codon	NO
AT1G31910	Q67XB6, Q9C6T1, Q9C6T1-2	AT1G31910		GHMP kinase family protein	STRINGENT	STRINGENT	STRINGENT	YES	YES	YES	YES	3'UTR,3'UTR	3'UTR	3'UTR	3'UTR	Stop codon	NO
AT1G31970	Q9C551	STRS1	RH5, STRS1	DEA(D/H)-box RNA helicase family protein	STRINGENT	STRINGENT	STRINGENT	YES	YES	YES	YES	3'UTR	NO	3'UTR	3'UTR	CDS, Stop codon	3'UTR
AT1G32050	Q9C6X2	SCAMP5	AtSCAMP5, SCAMP5	SCAMP family protein	STRINGENT	STRINGENT	STRINGENT	YES	NO	YES	NO	3'UTR	NO	3'UTR	3'UTR, 5'UTR	3' UTR	NO
AT1G32060	P25697	PRK	PRK	phosphoribulokinase	STRINGENT	STRINGENT	N.A.	YES	NO	NO	NO	3'UTR	NO	3'UTR	3'UTR, 5'UTR, CDS	CDS, 3' UTR	NO
AT1G32080	Q9FVQ4	LrgB	AtLrgB, LrgB, PLGG, PLGG1	membrane protein	STRINGENT	STRINGENT	N.A.	YES	YES	NO	NO	3'UTR	3'UTR	3'UTR	3'UTR, 5'UTR	NO	NO
AT1G32130	F4ICK7, F4ICK8	IWS1	ATIWS1, HNI9, IWS1	Transcription elongation factor (TFIIS) family protein	STRINGENT	STRINGENT	STRINGENT	YES	NO	YES	NO	3'UTR,3'UTR	NO	3'UTR	3'UTR	NO	3'UTR
AT1G32200	C0Z249, Q43307	1	ACT1, ATS1	phospholipid/glycerol acyltransferase family protein	STRINGENT	STRINGENT	N.A.	YES	NO	NO	NO	3'UTR,3'UTR	3'UTR	NO	3'UTR	3' UTR, Stop codon	3'UTR
AT1G32210	A0A178VT31, A0A1P8AMW1, Q39080	ATDAD1	ATDAD1	Defender against death (DAD family) protein	STRINGENT	N.A.	STRINGENT	NO	NO	YES	YES	3'UTR,3'UTR	NO	3'UTR	3'UTR	Stop codon	3'UTR
AT1G32230	F4ICM3, Q8RY59, Q8RY59-2	RCD1	ATP8, AtRCD1, CEO, CEO1, RCD1, RIMB1	WWE protein-protein interaction domain protein family	STRINGENT	STRINGENT	STRINGENT	YES	NO	YES	YES	3'UTR,3'UTR,3'UTR,3'UTR,3'UTR,3'UTR	3'UTR	3'UTR	3'UTR	Stop codon	3'UTR
AT1G32310	A0A178W9X4, Q9C613	SAMBA	SAMBA	valine-tRNA ligase	STRINGENT	STRINGENT	STRINGENT	YES	YES	YES	YES	3'UTR	3'UTR	3'UTR	NO	NO	3'UTR
AT1G32400	Q9C5W7	TOM2A	TOM2A	tobamovirus multiplication 2A	STRINGENT	STRINGENT	STRINGENT	YES	YES	YES	YES	3'UTR,3'UTR,3'UTR	NO	3'UTR	3'UTR	3' UTR	3'UTR
AT1G32440	Q93Z53	PKp3	PKp3	plastidial pyruvate kinase 3	STRINGENT	STRINGENT	STRINGENT	YES	NO	YES	NO	3'UTR	CDS, 3'UTR	3'UTR	3'UTR	NO	3'UTR
AT1G32470	Q9LQL0	AT1G32470		Single hybrid motif superfamily protein	STRINGENT	STRINGENT	N.A.	YES	YES	NO	NO	3'UTR	NO	3'UTR	3'UTR	Stop codon	NO
AT1G32550	F4IE99, Q9C7Y4	FdC2	FdC2	2Fe-2S ferredoxin-like superfamily protein	STRINGENT	STRINGENT	N.A.	YES	NO	NO	NO	3'UTR	NO	3'UTR	3'UTR	Stop codon, coding_intron	3'UTR
AT1G32790	F4IEC7, Q9LPI5	CID11	CID11	CTC-interacting domain 11	STRINGENT	STRINGENT	STRINGENT	YES	YES	YES	YES	3'UTR,CDS,3'UTR,3'UTR	CDS	3'UTR, CDS	3'UTR, CDS	Stop codon	NO
AT1G32990	Q9MAP3	PRPL11	PRPL11	plastid ribosomal protein l11	STRINGENT	STRINGENT	N.A.	YES	NO	NO	NO	3'UTR	3'UTR	3'UTR	3'UTR, CDS	Stop codon	3'UTR
AT1G33120	P49209	AT1G33120		Ribosomal protein L6 family	STRINGENT	STRINGENT	STRINGENT	YES	YES	YES	YES	3'UTR	NO	3'UTR	3'UTR, CDS, 5'UTR	Stop codon	3'UTR
AT1G33140	P49209	PGY2	PGY2	Ribosomal protein L6 family	STRINGENT	STRINGENT	STRINGENT	YES	YES	YES	YES	3'UTR	NO	3'UTR	3'UTR, CDS, 5'UTR	Stop codon	3'UTR
AT1G33810	Q8L9M8	AT1G33810		zinc finger/BTB domain protein	STRINGENT	STRINGENT	N.A.	YES	YES	NO	NO	3'UTR	3'UTR	3'UTR	3'UTR	Stop codon	3'UTR
AT1G33990	Q9FVW3, Q9FVW3-2	MES14	ATMES14, MES14	methyl esterase 14	STRINGENT	STRINGENT	STRINGENT	YES	YES	YES	YES	3'UTR	NO	3'UTR	3'UTR	NO	3'UTR
AT1G34000	Q9FEC1	OHP2	OHP2	one-helix protein 2	STRINGENT	STRINGENT	N.A.	YES	NO	NO	NO	3'UTR	NO	3'UTR	3'UTR, 5'UTR	Stop codon	3'UTR
AT1G34030	P34788	AT1G34030		Ribosomal protein S13/S18 family	STRINGENT	STRINGENT	STRINGENT	YES	YES	YES	YES	3'UTR	NO	3'UTR	3'UTR	Stop codon	NO
AT1G34430	Q9C8P0	EMB3003	EMB3003	2-oxoacid dehydrogenases acyltransferase family protein	STRINGENT	STRINGENT	N.A.	YES	YES	NO	NO	3'UTR	3'UTR	3'UTR	3'UTR	Stop codon	3'UTR
AT1G35160	F4HWQ5, P46077, Q94BW0	GF14 PHI	14-3-3PHI, GF14 PHI, GRF4	GF14 protein phi chain	STRINGENT	STRINGENT	STRINGENT	YES	YES	YES	YES	3'UTR,3'UTR	NO	3'UTR	3'UTR	3' UTR	3'UTR
AT1G35580	F4HZY9, Q9LQF2	CINV1	A/N-InvG, CINV1	cytosolic invertase 1	STRINGENT	STRINGENT	STRINGENT	YES	YES	YES	YES	3'UTR,3'UTR	NO	3'UTR	3'UTR	Stop codon	NO
AT1G35680	P51412	RPL21C	RPL21C	Ribosomal protein L21	STRINGENT	STRINGENT	N.A.	YES	YES	NO	NO	3'UTR	NO	3'UTR	3'UTR, CDS	Stop codon	NO
AT1G36050	F4I1K2, Q9C8W1	AT1G36050		Endoplasmic reticulum vesicle transporter protein	STRINGENT	STRINGENT	STRINGENT	YES	YES	YES	YES	3'UTR	NO	NO	3'UTR	NO	3'UTR
AT1G36160	Q38970	ACC1	ACC1, AT-ACC1, EMB22, GK, GSD1, PAS3, SFR3	acetyl-CoA carboxylase 1	STRINGENT	STRINGENT	STRINGENT	YES	YES	YES	YES	3'UTR,3'UTR	3'UTR	3'UTR	3'UTR	NO	3'UTR
AT1G36320	Q9C8X8	AT1G36320		hypothetical protein	STRINGENT	STRINGENT	STRINGENT	YES	YES	NO	YES	3'UTR	3'UTR	3'UTR	3'UTR	Stop codon	3'UTR
AT1G36980	Q949Z8	AT1G36980		transmembrane 50A-like protein	STRINGENT	STRINGENT	STRINGENT	YES	NO	YES	YES	3'UTR,3'UTR	NO	3'UTR	3'UTR, 5'UTR	Stop codon	3'UTR
AT1G41880	Q9FZH0	AT1G41880		Ribosomal protein L35Ae family protein	STRINGENT	STRINGENT	STRINGENT	YES	YES	YES	YES	3'UTR,3'UTR	NO	3'UTR	3'UTR	NO	NO
AT1G42960	Q9C7S3	AT1G42960		inner membrane localized protein	STRINGENT	STRINGENT	STRINGENT	YES	YES	YES	YES	3'UTR	NO	3'UTR	3'UTR	Stop codon	NO
AT1G42970	P25857	GAPB	GAPB	glyceraldehyde-3-phosphate dehydrogenase B subunit	STRINGENT	STRINGENT	STRINGENT	YES	YES	YES	NO	3'UTR	NO	3'UTR	3'UTR, 5'UTR, CDS	NO	NO
AT1G43130	A0A1P8AQW2, Q9C8C1	LCV2	LCV2	like COV 2	STRINGENT	N.A.	STRINGENT	NO	NO	YES	NO	3'UTR,3'UTR,3'UTR	NO	3'UTR	3'UTR	Stop codon	3'UTR
AT1G43170	A8MQQ1, P17094, Q0WLE7	RP1	ARP1, emb2207, RP1, RPL3A	ribosomal protein 1	STRINGENT	STRINGENT	STRINGENT	YES	YES	YES	YES	3'UTR,3'UTR,3'UTR,3'UTR,3'UTR,3'UTR,3'UTR,3'UTR,3'UTR,3'UTR,3'UTR,3'UTR,3'UTR	3'UTR	3'UTR	3'UTR	NO	NO
AT1G43560	Q8L7S9	ty2	Aty2, ty2	thioredoxin Y2	STRINGENT	STRINGENT	N.A.	YES	YES	NO	NO	3'UTR	NO	3'UTR	3'UTR	Stop codon	3'UTR
AT1G43670	Q9MA79	FBP	AtcFBP, cyfbp, FBP, FINS1	Inositol monophosphatase family protein	STRINGENT	STRINGENT	STRINGENT	YES	YES	YES	NO	3'UTR	NO	3'UTR	3'UTR, 5'UTR	NO	3'UTR
AT1G43890	A0A178W8U4, O23657	RAB18	ATRAB-C1, ATRAB18, ATRABC1, RAB18, RAB18-1, RABC1	RAB GTPASE HOMOLOG B18	STRINGENT	STRINGENT	STRINGENT	YES	YES	YES	YES	3'UTR,3'UTR,3'UTR,3'UTR,3'UTR	NO	3'UTR	3'UTR	NO	3'UTR
AT1G44000	A0A178WIS0, Q94AQ9	AT1G44000	SGRL	STAY-GREEN-like protein	STRINGENT	STRINGENT	N.A.	YES	NO	NO	NO	CDS,3'UTR	NO	3'UTR	3'UTR	Stop codon	3'UTR
AT1G44575	F4IEG8, Q9XF91	NPQ4	CP22, NPQ4, PSBS	Chlorophyll A-B binding family protein	STRINGENT	STRINGENT	STRINGENT	YES	YES	YES	YES	3'UTR,3'UTR,3'UTR	NO	CDS, 3'UTR	3'UTR, CDS	Stop codon	NO
AT1G45474	Q9C639	Lhca5	Lhca5	photosystem I light harvesting complex protein 5	STRINGENT	STRINGENT	N.A.	YES	NO	NO	NO	3'UTR	StopCodon, 3'UTR	CDS, 3'UTR	3'UTR, CDS	Stop codon	3'UTR
AT1G45688	F4HRE0, Q9C636	AT1G45688	CC1	transmembrane protein	STRINGENT	STRINGENT	STRINGENT	YES	NO	YES	YES	3'UTR,3'UTR	CDS	3'UTR	NO	NO	NO
AT1G47128	P43297	RD21A	RD21, RD21A	Granulin repeat cysteine protease family protein	STRINGENT	STRINGENT	STRINGENT	YES	YES	YES	YES	3'UTR	CDS	3'UTR	3'UTR, 5'UTR, CDS	Stop codon	NO
AT1G47260	Q9C6B3	GAMMA CA2	APFI, GAMMA CA2	gamma carbonic anhydrase 2	STRINGENT	STRINGENT	STRINGENT	YES	YES	YES	YES	3'UTR	CDS	3'UTR	3'UTR	Stop codon	3'UTR
AT1G47420	Q9SX77	SDH5	SDH5	succinate dehydrogenase 5	STRINGENT	STRINGENT	STRINGENT	YES	YES	YES	YES	3'UTR	NO	3'UTR	3'UTR	Stop codon	3'UTR
AT1G47490	Q9SX79, Q9SX79-2	RBP47C	ATRBP47C, RBP47C	RNA-binding protein 47C	STRINGENT	STRINGENT	STRINGENT	YES	YES	YES	YES	3'UTR,3'UTR	3'UTR	3'UTR	3'UTR	3' UTR	3'UTR
AT1G47530	A0A1P8AUJ9, Q9SX83	AT1G47530	DTX33	MATE efflux family protein	STRINGENT	STRINGENT	STRINGENT	YES	YES	YES	YES	3'UTR,3'UTR	NO	3'UTR	3'UTR	Stop codon	3'UTR
AT1G47640	Q9SX96	AT1G47640		seven transmembrane domain protein	STRINGENT	STRINGENT	STRINGENT	YES	NO	YES	YES	3'UTR	NO	3'UTR	3'UTR	Stop codon	3'UTR
AT1G47720	Q9SX99	OSB1	OSB1	Primosome PriB/single-strand DNA-binding protein	STRINGENT	STRINGENT	STRINGENT	NO	YES	NO	YES	3'UTR	NO	NO	NO	NO	NO
AT1G47830	Q84WL9	AT1G47830		SNARE-like superfamily protein	STRINGENT	STRINGENT	STRINGENT	YES	YES	YES	YES	3'UTR	3'UTR	3'UTR	3'UTR	Stop codon	3'UTR
AT1G48030	Q9M5K3	mtLPD1	mtLPD1	mitochondrial lipoamide dehydrogenase 1	STRINGENT	STRINGENT	STRINGENT	YES	YES	YES	YES	3'UTR,3'UTR,3'UTR,3'UTR,3'UTR	NO	3'UTR	3'UTR	Stop codon	3'UTR
AT1G48090	A0A178W680, A0A178W845, A0A1P8AMP4, A0A1P8AMP6, A0A1P8AMQ1, A0A1P8AMQ8, F4HWS2, Q8LGH2	AT1G48090		calcium-dependent lipid-binding family protein	STRINGENT	STRINGENT	STRINGENT	YES	NO	YES	NO	3'UTR,3'UTR,3'UTR,3'UTR,3'UTR	3'UTR	NO	3'UTR	3' UTR	3'UTR
AT1G48160	Q943Z6	AT1G48160		signal recognition particle 19 kDa protein, putative / SRP19	STRINGENT	STRINGENT	STRINGENT	YES	NO	YES	YES	3'UTR,3'UTR	NO	NO	3'UTR	Stop codon	3'UTR
AT1G48230	A0A1P8AT28, Q9LNH5	AT1G48230		nodulin MtN21 /EamA-like transporter family protein	STRINGENT	STRINGENT	STRINGENT	YES	YES	YES	YES	3'UTR,3'UTR	NO	3'UTR	3'UTR	Stop codon, 3' UTR	3'UTR
AT1G48350	Q9SX68	EMB3105	EMB3105	Ribosomal L18p/L5e family protein	STRINGENT	STRINGENT	N.A.	YES	YES	NO	NO	3'UTR	NO	3'UTR	3'UTR, CDS	Stop codon	NO
AT1G48410	A0A178WL72, O04379, O04379-2	AGO1	AGO1, AtAGO1, ICU9	Stabilizer of iron transporter SufD / Polynucleotidyl transferase	STRINGENT	STRINGENT	STRINGENT	YES	YES	YES	YES	3'UTR,3'UTR	NO	3'UTR	3'UTR	Stop codon	3'UTR
AT1G48440	Q8LDS7	AT1G48440		B-cell receptor-associated 31-like protein	STRINGENT	STRINGENT	STRINGENT	YES	NO	YES	YES	3'UTR	3'UTR	3'UTR	3'UTR	Stop codon	3'UTR
AT1G48450	F4HYF6, F4HYF8, Q9LP80	AT1G48450		alanine-tRNA ligase, putative (DUF760)	STRINGENT	STRINGENT	STRINGENT	YES	YES	YES	NO	3'UTR,CDS,3'UTR,3'UTR,3'UTR,3'UTR	NO	3'UTR, CDS	3'UTR, CDS	Stop codon	3'UTR
AT1G48600	A0A178WLU9, Q944H0, Q944H0-2	PMEAMT	AtPMEAMT, AtPMT2, PMEAMT	S-adenosyl-L-methionine-dependent methyltransferases superfamily protein	STRINGENT	STRINGENT	STRINGENT	YES	YES	YES	YES	3'UTR,3'UTR	CDS	3'UTR	3'UTR	Stop codon	NO
AT1G48630	Q9C4Z6	RACK1B_AT	RACK1B, RACK1B_AT	receptor for activated C kinase 1B	STRINGENT	STRINGENT	STRINGENT	YES	YES	YES	YES	3'UTR	NO	3'UTR	3'UTR	Stop codon	3'UTR
AT1G48790	Q8VYB5	AMSH1	AMSH1	associated molecule with the SH3 domain of STAM 1	STRINGENT	STRINGENT	STRINGENT	YES	NO	YES	NO	3'UTR	NO	NO	3'UTR	Stop codon	3'UTR
AT1G48830	Q9C514	AT1G48830		Ribosomal protein S7e family protein	STRINGENT	STRINGENT	STRINGENT	YES	YES	YES	YES	3'UTR,3'UTR	NO	3'UTR	3'UTR	Stop codon	3'UTR
AT1G48850	A0A178W8K1, F4I032, F4I033, P57720	EMB1144	EMB1144	chorismate synthase, putative / 5-enolpyruvylshikimate-3-phosphate phospholyase	STRINGENT	STRINGENT	STRINGENT	YES	YES	YES	YES	3'UTR,3'UTR,3'UTR	NO	3'UTR	3'UTR	Stop codon	3'UTR
AT1G48920	Q9FVQ1, Q9M994	NUC-L1	ATNUC-L1, NUC-L1, NUC1, PARL1	nucleolin like 1	STRINGENT	STRINGENT	STRINGENT	YES	YES	YES	YES	3'UTR	3'UTR	3'UTR	3'UTR	NO	NO
AT1G49140	Q9M9B4	AT1G49140		NADH dehydrogenase ubiquinone 1 beta subcomplex subunit 10-B-like protein (Complex I subunit NDUFS6)	STRINGENT	STRINGENT	STRINGENT	YES	YES	YES	YES	3'UTR,3'UTR	NO	3'UTR	3'UTR	NO	3'UTR
AT1G49240	Q96293	ACT8	ACT8, FIZ1	actin 8	STRINGENT	STRINGENT	STRINGENT	YES	YES	YES	YES	3'UTR	3'UTR, CDS	3'UTR	3'UTR	3' UTR	3'UTR
AT1G49300	A0A178W3Y1, Q9XI98	RABG3E	ATRAB7, ATRABG3E, RABG3E	RAB GTPase homolog G3E	STRINGENT	STRINGENT	STRINGENT	YES	YES	YES	YES	3'UTR	3'UTR	3'UTR	3'UTR	coding_intron	3'UTR
AT1G49410	Q9XIA7	TOM6	TOM6	translocase of the outer mitochondrial membrane 6	STRINGENT	STRINGENT	STRINGENT	YES	YES	YES	YES	3'UTR	3'UTR	3'UTR	3'UTR	3' UTR	3'UTR
AT1G49600	A0A178WAQ6, A0A1P8ASD0, F4I3B3	RBP47A	ATRBP47A, RBP47A	RNA-binding protein 47A	STRINGENT	STRINGENT	STRINGENT	YES	YES	YES	YES	3'UTR,3'UTR,3'UTR	NO	3'UTR	3'UTR	3' UTR	3'UTR
AT1G49670	F4I3C3, Q9FX95	NQR	NQR	ARP protein (REF)	STRINGENT	STRINGENT	STRINGENT	YES	NO	YES	YES	3'UTR,3'UTR	3'UTR	3'UTR	3'UTR	3' UTR	3'UTR
AT1G49760	Q9FXA2	8	PAB8, PABP8	poly(A) binding protein 8	STRINGENT	STRINGENT	STRINGENT	YES	YES	YES	YES	3'UTR	3'UTR	3'UTR	3'UTR	NO	3'UTR
AT1G49970	Q9XJ35	CLPR1	CLPR1, NCLPP5, SVR2	CLP protease proteolytic subunit 1	STRINGENT	STRINGENT	STRINGENT	YES	YES	YES	YES	3'UTR	NO	3'UTR	3'UTR	Stop codon	NO
AT1G50010	B9DGT7	TUA2	TUA2	tubulin alpha-2 chain	STRINGENT	STRINGENT	STRINGENT	YES	YES	YES	YES	3'UTR	NO	3'UTR	3'UTR	Stop codon	NO
AT1G50200	A0A178W6W4, F4I4Z2, P36428, P36428-2	ALATS	ACD, ALATS	Alanyl-tRNA synthetase	STRINGENT	STRINGENT	STRINGENT	YES	YES	YES	YES	3'UTR,3'UTR	NO	3'UTR	3'UTR	Stop codon	NO
AT1G50250	Q39102	FTSH1	FTSH1	FTSH protease 1	STRINGENT	STRINGENT	N.A.	YES	NO	NO	NO	3'UTR	NO	3'UTR	3'UTR	Stop codon	NO
AT1G50320	Q8LD49	THX	ATHX, ATX, THX	thioredoxin X	STRINGENT	STRINGENT	N.A.	YES	YES	NO	NO	3'UTR	NO	3'UTR	3'UTR	NO	3'UTR
AT1G50430	A8MS34, Q9LDU6	DWF5	7RED, DWF5, LE, PA, ST7R	Ergosterol biosynthesis ERG4/ERG24 family	STRINGENT	STRINGENT	STRINGENT	YES	NO	YES	YES	3'UTR,3'UTR	3'UTR	3'UTR	3'UTR	Stop codon	3'UTR
AT1G50920	Q9C6I8	AT1G50920	Nog1-1	Nucleolar GTP-binding protein	STRINGENT	STRINGENT	STRINGENT	YES	YES	YES	YES	3'UTR	NO	3'UTR	3'UTR	NO	NO
AT1G51070	F4I7Z3, Q9C682	bHLH115	bHLH115	basic helix-loop-helix (bHLH) DNA-binding superfamily protein	STRINGENT	STRINGENT	STRINGENT	YES	YES	YES	YES	3'UTR,3'UTR	NO	NO	3'UTR	Stop codon	3'UTR
AT1G51160	Q9SYB8	AT1G51160	AtBET5	SNARE-like superfamily protein	STRINGENT	N.A.	STRINGENT	NO	NO	NO	YES	3'UTR,3'UTR,3'UTR	NO	3'UTR	3'UTR	Stop codon	3'UTR
AT1G51200	Q8H0X0	AT1G51200		A20/AN1-like zinc finger family protein	STRINGENT	STRINGENT	STRINGENT	YES	YES	YES	YES	3'UTR,3'UTR,3'UTR,3'UTR	NO	3'UTR	3'UTR, 5'UTR	3' UTR	NO
AT1G51510	F4I9J7	Y14	Y14	RNA-binding (RRM/RBD/RNP motifs) family protein	STRINGENT	STRINGENT	STRINGENT	YES	YES	YES	YES	3'UTR	NO	3'UTR	3'UTR	Stop codon	3'UTR
AT1G51650	Q96253	AT1G51650		ATP synthase epsilon chain	STRINGENT	STRINGENT	STRINGENT	YES	YES	YES	YES	3'UTR	NO	3'UTR	3'UTR	Stop codon	NO
AT1G51690	A0A178W8Q2, A0A178WBC1, A0A1P8AUA0, F4I9M3, Q38821, Q38821-2	B ALPHA	ATB ALPHA, B ALPHA	protein phosphatase 2A 55 kDa regulatory subunit B alpha isoform	STRINGENT	STRINGENT	STRINGENT	YES	YES	YES	YES	3'UTR,3'UTR,3'UTR,3'UTR,3'UTR	3'UTR	3'UTR	3'UTR	3' UTR	3'UTR
AT1G51710	B3H5V4, Q949Y0	UBP6	ATUBP6, UBP6	ubiquitin-specific protease 6	STRINGENT	STRINGENT	STRINGENT	YES	YES	YES	YES	3'UTR,3'UTR	3'UTR	3'UTR	3'UTR	NO	3'UTR
AT1G51730	Q9C8I1	AT1G51730		Ubiquitin-conjugating enzyme family protein	STRINGENT	STRINGENT	STRINGENT	YES	YES	YES	YES	3'UTR	NO	NO	3'UTR	3' UTR	3'UTR
AT1G51980	A8MQE5, Q9ZU25	AT1G51980		Insulinase (Peptidase family M16) protein	STRINGENT	STRINGENT	STRINGENT	YES	YES	YES	YES	3'UTR,3'UTR	3'UTR	3'UTR	3'UTR	Stop codon	3'UTR
AT1G52220	A0A1P8ASY4, Q9M812, Q9M812-2, Q9M812-3	AT1G52220	CURT1C	CURVATURE THYLAKOID protein	STRINGENT	STRINGENT	N.A.	YES	YES	NO	NO	3'UTR,3'UTR,3'UTR,3'UTR	3'UTR	3'UTR	3'UTR	NO	NO
AT1G52300	Q43292	AT1G52300		Zinc-binding ribosomal protein family protein	STRINGENT	STRINGENT	STRINGENT	YES	YES	YES	YES	5'UTR,3'UTR	NO	3'UTR	3'UTR	Stop codon	NO
AT1G52510	F4ICZ4, Q683C5, Q8VZ57	AT1G52510		alpha/beta-Hydrolases superfamily protein	STRINGENT	STRINGENT	N.A.	YES	YES	NO	NO	3'UTR	3'UTR	3'UTR	3'UTR	3' UTR	3'UTR
AT1G52600	Q9SSR2	AT1G52600		Peptidase S24/S26A/S26B/S26C family protein	STRINGENT	N.A.	STRINGENT	NO	NO	NO	YES	3'UTR	3'UTR	3'UTR	NO	Stop codon	3'UTR
AT1G52740	Q9C944	HTA9	H2A.Z, HTA9	histone H2A protein 9	STRINGENT	STRINGENT	STRINGENT	YES	NO	YES	YES	3'UTR	NO	3'UTR	3'UTR	3' UTR	NO
AT1G52870	Q8LF31, Q9C933	AT1G52870		Peroxisomal membrane 22 kDa (Mpv17/PMP22) family protein	STRINGENT	STRINGENT	STRINGENT	YES	NO	YES	NO	3'UTR,3'UTR	3'UTR	3'UTR	3'UTR	3' UTR	3'UTR
AT1G52980	Q9C923, Q9C923-2	AtNug2	AtNug2, Nug2	GTP-binding family protein	STRINGENT	STRINGENT	STRINGENT	YES	NO	YES	YES	3'UTR	NO	3'UTR	3'UTR	Stop codon	NO
AT1G53030	Q94FT1	AT1G53030		Cytochrome C oxidase copper chaperone (COX17)	STRINGENT	STRINGENT	STRINGENT	YES	YES	YES	YES	3'UTR	3'UTR	NO	3'UTR	NO	3'UTR
AT1G53210	Q8L636	AT1G53210	AtNCL, NCL	sodium/calcium exchanger family protein / calcium-binding EF hand family protein	STRINGENT	STRINGENT	STRINGENT	YES	NO	YES	YES	3'UTR	NO	CDS, 3'UTR	3'UTR	Stop codon	NO
AT1G53240	Q9ZP06	mMDH1	mMDH1	Lactate/malate dehydrogenase family protein	STRINGENT	STRINGENT	STRINGENT	YES	YES	YES	YES	3'UTR	NO	3'UTR	3'UTR	3' UTR	NO
AT1G53310	Q9MAH0	PPC1	ATPEPC1, ATPPC1, PEPC1, PPC1	phosphoenolpyruvate carboxylase 1	STRINGENT	STRINGENT	STRINGENT	YES	YES	YES	YES	3'UTR,3'UTR,3'UTR	NO	3'UTR	NO	Stop codon	NO
AT1G53560	Q9LPH1	AT1G53560		Ribosomal protein L18ae family	STRINGENT	STRINGENT	STRINGENT	YES	NO	YES	YES	3'UTR	NO	3'UTR	3'UTR	Stop codon	3'UTR
AT1G53670	Q9C8M2, Q9C8M2-2	MSRB1	ATMSRB1, MSRB1	methionine sulfoxide reductase B 1	STRINGENT	STRINGENT	N.A.	YES	NO	NO	NO	3'UTR,3'UTR	NO	3'UTR	3'UTR	Stop codon	3'UTR
AT1G53750	Q9SSB5	RPT1A	RPT1A	regulatory particle triple-A 1A	STRINGENT	STRINGENT	STRINGENT	YES	NO	YES	YES	CDS,3'UTR	NO	3'UTR	3'UTR	Stop codon	3'UTR
AT1G54030	A0A1P8AW84, Q7XA74	1	ERMO3, GOLD36, MVP1, NUC	GDSL-like Lipase/Acylhydrolase superfamily protein	STRINGENT	N.A.	STRINGENT	NO	NO	YES	YES	3'UTR,3'UTR	3'UTR	NO	NO	CDS, Stop codon	3'UTR
AT1G54080	F4HV67, Q9SYG4	UBP1A	UBP1A	oligouridylate-binding protein 1A	STRINGENT	STRINGENT	STRINGENT	YES	YES	YES	YES	3'UTR,3'UTR	CDS	3'UTR	3'UTR	3' UTR	3'UTR, CDS
AT1G54100	Q9SYG7	ALDH7B4	ALDH7B4	aldehyde dehydrogenase 7B4	STRINGENT	STRINGENT	STRINGENT	YES	NO	YES	YES	3'UTR,3'UTR	3'UTR	3'UTR	3'UTR	NO	3'UTR
AT1G54270	F4HV96, P41377	EIF4A-2	EIF4A-2	eif4a-2	STRINGENT	N.A.	STRINGENT	NO	NO	YES	YES	3'UTR,3'UTR	NO	3'UTR	3'UTR	Stop codon	3'UTR
AT1G54410	Q9SLJ2	AT1G54410	AtHIRD11, HIRD11	dehydrin family protein	STRINGENT	STRINGENT	STRINGENT	YES	YES	NO	YES	3'UTR	NO	NO	5'UTR, CDS, 3'UTR	NO	NO
AT1G54490	A0A1P8AQR8, Q9FQ04	XRN4	AIN1, ATXRN4, EIN5, XRN4	exoribonuclease 4	STRINGENT	STRINGENT	STRINGENT	YES	YES	YES	YES	3'UTR,3'UTR	NO	CDS, 3'UTR	NO	NO	NO
AT1G54520	Q8RWI0	AT1G54520	FLAP1	myelin-associated oligodendrocyte basic protein	STRINGENT	STRINGENT	N.A.	YES	NO	NO	NO	3'UTR	CDS	3'UTR	3'UTR	Stop codon	3'UTR
AT1G54580	P25701	ACP2	ACP2, AtACP2	acyl carrier protein 2	STRINGENT	STRINGENT	STRINGENT	YES	YES	YES	YES	CDS,3'UTR	NO	3'UTR	3'UTR	Stop codon	3'UTR
AT1G54630	F4HWZ6, P25702	ACP3	ACP3, AtACP3	acyl carrier protein 3	STRINGENT	STRINGENT	STRINGENT	YES	YES	YES	YES	3'UTR,3'UTR	NO	3'UTR	3'UTR	Stop codon	3'UTR
AT1G54780	Q9ZVL6	TLP18.3	AtTLP18.3, TLP18.3	thylakoid lumen 18.3 kDa protein	STRINGENT	STRINGENT	N.A.	YES	NO	NO	NO	CDS,3'UTR	NO	CDS, 3'UTR	3'UTR, CDS	Stop codon	NO
AT1G55000	Q9FZ32	AT1G55000		peptidoglycan-binding LysM domain-containing protein	STRINGENT	STRINGENT	N.A.	YES	NO	NO	NO	3'UTR,3'UTR,3'UTR	3'UTR	3'UTR	3'UTR	Stop codon	3'UTR
AT1G55160	B3H4C4, F4HYQ1, Q9C542	AT1G55160		WAS/WASL-interacting family protein	STRINGENT	STRINGENT	STRINGENT	YES	YES	YES	YES	3'UTR,3'UTR,3'UTR	3'UTR	3'UTR	3'UTR	3' UTR	3'UTR
AT1G55480	Q94BS2	ZKT	ZKT	protein containing PDZ domain, a K-box domain, and a TPR region	STRINGENT	STRINGENT	N.A.	YES	NO	NO	NO	3'UTR	NO	3'UTR	3'UTR	NO	3'UTR
AT1G55490	P21240	CPN60B	CPN60B, Cpn60beta1, CPNB1, LEN1	chaperonin 60 beta	STRINGENT	STRINGENT	STRINGENT	YES	YES	YES	YES	3'UTR,3'UTR,3'UTR,3'UTR,3'UTR	NO	3'UTR	3'UTR	Stop codon	NO
AT1G55670	Q9S7N7	PSAG	PSAG	photosystem I subunit G	STRINGENT	STRINGENT	N.A.	NO	YES	NO	NO	3'UTR	NO	3'UTR	3'UTR, 5'UTR, CDS	NO	NO
AT1G55840	A0A178WES8, A8MRG3, Q8W580	AT1G55840		Sec14p-like phosphatidylinositol transfer family protein	STRINGENT	STRINGENT	STRINGENT	YES	NO	YES	NO	3'UTR,3'UTR	NO	3'UTR	NO	NO	3'UTR
AT1G56045	P62120	AT1G56045		Ribosomal protein L41 family	STRINGENT	STRINGENT	STRINGENT	YES	YES	YES	YES	3'UTR	NO	3'UTR	3'UTR	Stop codon	NO
AT1G56070	Q9ASR1, Q9ASR1-2	LOS1	LOS1	Ribosomal protein S5/Elongation factor G/III/V family protein	STRINGENT	STRINGENT	STRINGENT	YES	YES	YES	YES	3'UTR,3'UTR,3'UTR	NO	3'UTR	3'UTR	Stop codon	NO
AT1G56110	Q9SGT7	NOP56	NOP56	NOP56-like pre RNA processing ribonucleoprotein	STRINGENT	STRINGENT	STRINGENT	YES	YES	NO	YES	3'UTR	3'UTR	NO	3'UTR	CDS	3'UTR
AT1G56190	F4I3L1, P50318	AT1G56190	cPGK2, PGK2	Phosphoglycerate kinase family protein	STRINGENT	STRINGENT	STRINGENT	YES	YES	YES	YES	3'UTR,3'UTR	NO	3'UTR	3'UTR	NO	NO
AT1G56200	A8MS46, Q9C7J5	EMB1303	EMB1303	embryo defective 1303	STRINGENT	STRINGENT	STRINGENT	YES	YES	YES	YES	3'UTR,3'UTR	NO	3'UTR	3'UTR	Stop codon	3'UTR
AT1G56280	F4I522	DI19	ATDI19, DI19	drought-induced 19	STRINGENT	STRINGENT	STRINGENT	YES	YES	YES	YES	3'UTR,3'UTR	3'UTR	3'UTR	3'UTR, CDS, 5'UTR	3' UTR	NO
AT1G56330	Q01474	SAR1B	ATSAR1, ATSAR1B, ATSARA1B, SAR1, SAR1B	secretion-associated RAS 1B	STRINGENT	STRINGENT	STRINGENT	YES	YES	YES	YES	3'UTR	NO	3'UTR	3'UTR	Stop codon	3'UTR
AT1G56340	C0Z2C0, F4I529, O04151	CRT1a	AtCRT1a, CRT1, CRT1a	calreticulin 1a	STRINGENT	N.A.	STRINGENT	NO	NO	YES	YES	3'UTR,3'UTR	NO	3'UTR	3'UTR	Stop codon	NO
AT1G56450	Q7DLR9	PBG1	PBG1	20S proteasome beta subunit G1	STRINGENT	STRINGENT	STRINGENT	YES	YES	YES	YES	3'UTR	NO	3'UTR	3'UTR	Stop codon	NO
AT1G56700	A8MSE7, Q9FXC0	AT1G56700		Peptidase C15, pyroglutamyl peptidase I-like protein	STRINGENT	STRINGENT	STRINGENT	YES	NO	YES	YES	3'UTR,3'UTR,3'UTR,3'UTR	NO	3'UTR	3'UTR	NO	NO
AT1G57660	Q9FDZ9	AT1G57660		Translation protein SH3-like family protein	STRINGENT	STRINGENT	STRINGENT	YES	YES	YES	YES	3'UTR	NO	3'UTR	3'UTR, CDS	NO	3'UTR
AT1G57720	Q56WV5, Q9FVT2	AT1G57720		Translation elongation factor EF1B, gamma chain	STRINGENT	STRINGENT	STRINGENT	YES	YES	YES	YES	3'UTR,3'UTR	NO	3'UTR	3'UTR	Stop codon	NO
AT1G57860	Q9FDZ9	AT1G57860		Translation protein SH3-like family protein	STRINGENT	STRINGENT	STRINGENT	YES	YES	YES	YES	3'UTR	NO	3'UTR	3'UTR	NO	3'UTR
AT1G58080	Q9S762	ATP-PRT1	ATATP-PRT1, ATP-PRT1, HISN1A	ATP phosphoribosyl transferase 1	STRINGENT	STRINGENT	N.A.	YES	NO	NO	NO	3'UTR	NO	3'UTR	3'UTR	NO	3'UTR
AT1G59610	Q9LQ55	DL3	ADL3, CF1, DL3, DRP2B	dynamin-like 3	STRINGENT	STRINGENT	STRINGENT	YES	YES	YES	YES	3'UTR	NO	3'UTR	3'UTR	Stop codon	3'UTR
AT1G59830	Q07099, Q07099-2	PP2A-1	PP2A-1	protein phosphatase 2A-2	STRINGENT	STRINGENT	STRINGENT	YES	NO	YES	NO	3'UTR,3'UTR	CDS	3'UTR	3'UTR	NO	NO
AT1G59900	A0A1P8AQS2, C0Z306, P52901	E1 ALPHA	AT-E1 ALPHA, E1 ALPHA	pyruvate dehydrogenase complex E1 alpha subunit	STRINGENT	STRINGENT	STRINGENT	YES	YES	YES	YES	3'UTR	NO	3'UTR	3'UTR	Stop codon	NO
AT1G60710	Q93ZN2	ATB2	ATB2	NAD(P)-linked oxidoreductase superfamily protein	STRINGENT	STRINGENT	STRINGENT	YES	YES	YES	YES	3'UTR	NO	3'UTR	3'UTR	3' UTR	3'UTR
AT1G60780	A0A178WDA8, O22715, Q0WPY1	HAP13	AP1M2, HAP13	Clathrin adaptor complexes medium subunit family protein	STRINGENT	STRINGENT	STRINGENT	YES	NO	YES	YES	3'UTR	3'UTR	3'UTR	3'UTR	Stop codon	3'UTR
AT1G60950	P16972	FED A	ATFD2, FD2, FED A	2Fe-2S ferredoxin-like superfamily protein	STRINGENT	STRINGENT	STRINGENT	YES	NO	YES	YES	3'UTR	3'UTR	3'UTR	5'UTR, 3'UTR, CDS	NO	NO
AT1G61150	A8MQN5, F4HTG9, Q84WK5, Q84WK5-2	AT1G61150		LisH and RanBPM domains containing protein	STRINGENT	N.A.	STRINGENT	NO	NO	YES	NO	3'UTR,3'UTR,3'UTR,3'UTR,3'UTR,3'UTR,3'UTR,3'UTR,3'UTR,3'UTR,3'UTR	3'UTR	3'UTR	3'UTR	3' UTR	3'UTR
AT1G61520	Q9SY97, Q9SY97-2	LHCA3	LHCA3	PSI type III chlorophyll a/b-binding protein	STRINGENT	STRINGENT	STRINGENT	NO	YES	YES	NO	3'UTR,3'UTR	NO	3'UTR	3'UTR, 5'UTR, CDS	NO	NO
AT1G61570	Q9XH48	TIM13	TIM13	translocase of the inner mitochondrial membrane 13	STRINGENT	STRINGENT	STRINGENT	YES	YES	YES	YES	3'UTR	NO	3'UTR	3'UTR	Stop codon	3'UTR
AT1G61620	Q9SY88	AT1G61620	CSU1	phosphoinositide binding protein	STRINGENT	STRINGENT	STRINGENT	YES	NO	YES	YES	3'UTR	NO	3'UTR	3'UTR	Stop codon	NO
AT1G61770	Q8GUN6	AT1G61770		Chaperone DnaJ-domain superfamily protein	STRINGENT	STRINGENT	STRINGENT	YES	YES	YES	YES	3'UTR	3'UTR	3'UTR	3'UTR	Stop codon	3'UTR
AT1G61790	Q9SYB5	AT1G61790	ARTUMES, OST3/6	Oligosaccharyltransferase complex/magnesium transporter family protein	STRINGENT	STRINGENT	STRINGENT	YES	YES	YES	YES	3'UTR	NO	3'UTR	3'UTR	NO	NO
AT1G62740	Q5XEP2	Hop2	Hop2	stress-inducible protein	STRINGENT	STRINGENT	STRINGENT	YES	NO	YES	YES	3'UTR	NO	3'UTR	3'UTR	NO	NO
AT1G62750	Q9SI75	SCO1	ATSCO1, ATSCO1/CPEF-G, SCO1	Translation elongation factor EFG/EF2 protein	STRINGENT	STRINGENT	N.A.	YES	YES	NO	NO	3'UTR	NO	3'UTR	3'UTR	Stop codon	NO
AT1G63290	Q9C8T3	AT1G63290		Aldolase-type TIM barrel family protein	STRINGENT	STRINGENT	STRINGENT	YES	YES	YES	YES	3'UTR	NO	NO	3'UTR	Stop codon	3'UTR
AT1G63660	F4I3P5, Q9CAD1	AT1G63660		GMP synthase (glutamine-hydrolyzing), putative / glutamine amidotransferase	STRINGENT	STRINGENT	STRINGENT	YES	YES	YES	YES	3'UTR,3'UTR	NO	3'UTR	3'UTR	NO	3'UTR
AT1G63770	B3H621, F4I3R0, F4I3R1, F4I3R4, Q8H0S9	AT1G63770		Peptidase M1 family protein	STRINGENT	STRINGENT	STRINGENT	YES	YES	YES	YES	3'UTR,3'UTR,3'UTR,3'UTR	NO	3'UTR	3'UTR	Stop codon	CDS, 3'UTR
AT1G63940	A0A384KW24, F4I576, F4I577, P92947, P92947-2	MDAR6	MDAR6	monodehydroascorbate reductase 6	STRINGENT	STRINGENT	STRINGENT	YES	YES	YES	YES	3'UTR,3'UTR,3'UTR,3'UTR	NO	3'UTR	3'UTR, CDS	Stop codon	3'UTR
AT1G63980	F4I583, Q940M0	AT1G63980		D111/G-patch domain-containing protein	STRINGENT	STRINGENT	STRINGENT	YES	YES	YES	YES	3'UTR,3'UTR	NO	3'UTR	3'UTR	Stop codon	3'UTR
AT1G64040	P48483	TOPP3	TOPP3	type one serine/threonine protein phosphatase 3	STRINGENT	STRINGENT	STRINGENT	YES	YES	YES	YES	3'UTR	3'UTR, StopCodon	3'UTR	3'UTR	3' UTR	3'UTR
AT1G64090	C0Z3C7, F4I596, Q9SH59	RTNLB3	RTN3, RTNLB3	Reticulan like protein B3	STRINGENT	STRINGENT	STRINGENT	YES	YES	YES	YES	3'UTR,3'UTR	NO	3'UTR	3'UTR	Stop codon	NO
AT1G64230	F4I5B8, F4I5C0, Q94F47	UBC28	UBC28	ubiquitin-conjugating enzyme 28	STRINGENT	STRINGENT	STRINGENT	YES	YES	YES	YES	5'UTR,5'UTR,5'UTR,5'UTR,5'UTR,CDS,CDS,CDS,CDS,CDS,3'UTR,3'UTR,3'UTR,3'UTR,3'UTR	NO	3'UTR	3'UTR, CDS, 5'UTR	Stop codon	NO
AT1G64510	A0A1P8AV66, Q8VY91	AT1G64510	PRPS6	Translation elongation factor EF1B/ribosomal protein S6 family protein	STRINGENT	STRINGENT	N.A.	YES	YES	NO	NO	3'UTR,3'UTR	NO	3'UTR	3'UTR	NO	NO
AT1G64520	Q9SGW3	RPN12a	RPN12a	regulatory particle non-ATPase 12A	STRINGENT	STRINGENT	STRINGENT	YES	YES	YES	YES	3'UTR	NO	3'UTR	3'UTR	Stop codon	3'UTR
AT1G64550	Q8H0V6	ABCF3	ABCF3, AtABCF3, AtGCN20, ATGCN3, GCN20, GCN3, SCORD5	general control non-repressible 3	STRINGENT	STRINGENT	STRINGENT	YES	YES	YES	YES	3'UTR	NO	3'UTR	3'UTR	Stop codon	3'UTR
AT1G64650	A8MR14, Q6NLR2	AT1G64650		Major facilitator superfamily protein	STRINGENT	STRINGENT	STRINGENT	YES	NO	YES	NO	3'UTR,3'UTR	NO	3'UTR	5'UTR, 3'UTR	3' UTR	3'UTR
AT1G64680	A0A1P8AS55, Q9SGU7	AT1G64680		beta-carotene isomerase D27	STRINGENT	STRINGENT	N.A.	YES	YES	NO	NO	3'UTR,3'UTR	NO	3'UTR	3'UTR	3' UTR	3'UTR
AT1G64720	Q56X35, Q9XIR9	CP5	CP5	Polyketide cyclase/dehydrase and lipid transport superfamily protein	STRINGENT	STRINGENT	STRINGENT	YES	YES	YES	YES	3'UTR	NO	3'UTR	3'UTR, CDS, 5'UTR	Stop codon	NO
AT1G64750	F4I886, Q9XIR8	DSS1(I)	ATDSS1(I), DSS1(I)	deletion of SUV3 suppressor 1(I)	STRINGENT	STRINGENT	STRINGENT	YES	YES	YES	YES	3'UTR,3'UTR,3'UTR	NO	3'UTR	3'UTR	Stop codon	3'UTR
AT1G64790	A0A1P8AT97, F4I893, F4I893-2	ILA	ILA, NOXY7	ILITYHIA	STRINGENT	STRINGENT	STRINGENT	YES	NO	YES	YES	3'UTR,3'UTR,3'UTR	3'UTR	3'UTR	3'UTR	Stop codon	3'UTR
AT1G64850	Q9XIR0	AT1G64850		Calcium-binding EF hand family protein	STRINGENT	N.A.	STRINGENT	NO	NO	YES	NO	3'UTR	NO	3'UTR, CDS	3'UTR, CDS	Stop codon	3'UTR
AT1G64860	O24629, O24629-2	SIGA	RPOD1, SIG1, SIG2, SIGA, SIGB	sigma factor A	STRINGENT	STRINGENT	N.A.	YES	NO	NO	NO	3'UTR,3'UTR	NO	3'UTR	3'UTR	Stop codon	NO
AT1G65230	Q8L604, Q9S9K3	AT1G65230		transmembrane protein, putative (DUF2358)	STRINGENT	STRINGENT	N.A.	YES	NO	NO	NO	CDS,3'UTR	NO	3'UTR	3'UTR, CDS, 5'UTR	Stop codon	NO
AT1G65260	A0A178W0D3, O80796	PTAC4	PTAC4, VIPP1	plastid transcriptionally active 4	STRINGENT	STRINGENT	STRINGENT	YES	YES	YES	YES	3'UTR,3'UTR	3'UTR	3'UTR	3'UTR, CDS	Stop codon	3'UTR
AT1G65270	O80798	AT1G65270		ER membrane protein complex subunit-like protein	STRINGENT	STRINGENT	STRINGENT	YES	YES	YES	YES	3'UTR,3'UTR,3'UTR	3'UTR, CDS	3'UTR	3'UTR	coding_intron	NO
AT1G65290	O80800	mtACP2	mtACP2	mitochondrial acyl carrier protein 2	STRINGENT	STRINGENT	STRINGENT	YES	YES	YES	YES	3'UTR	CDS	3'UTR	3'UTR	Stop codon	NO
AT1G65720	Q9SHY3	AT1G65720		transmembrane protein	STRINGENT	STRINGENT	STRINGENT	YES	YES	YES	YES	3'UTR	NO	3'UTR	3'UTR	NO	NO
AT1G65820	F4IBK9, F4IBL0, Q94BY2	AT1G65820		microsomal glutathione s-transferase	STRINGENT	STRINGENT	STRINGENT	YES	YES	YES	YES	3'UTR,3'UTR,3'UTR	3'UTR	3'UTR	3'UTR	Stop codon	3'UTR
AT1G65840	Q0WTP2, Q8H191	PAO4	ATPAO4, PAO4	polyamine oxidase 4	STRINGENT	N.A.	STRINGENT	NO	NO	YES	NO	3'UTR	NO	NO	NO	NO	NO
AT1G65930	Q9SRZ6	cICDH	cICDH	cytosolic NADP -dependent isocitrate dehydrogenase	STRINGENT	STRINGENT	STRINGENT	YES	YES	YES	YES	3'UTR	NO	3'UTR	3'UTR, 5'UTR	Stop codon	NO
AT1G65960	Q42472, Q56W28	GAD2	GAD2	glutamate decarboxylase 2	STRINGENT	STRINGENT	N.A.	YES	NO	NO	NO	3'UTR,3'UTR	NO	3'UTR	3'UTR	Stop codon	NO
AT1G65980	F4ID64, Q9XEX2	TPX1	TPX1	thioredoxin-dependent peroxidase 1	STRINGENT	STRINGENT	STRINGENT	YES	YES	YES	YES	3'UTR,3'UTR	NO	3'UTR	3'UTR	Stop codon	NO
AT1G66200	C0Z2C2, F4ID91, F4ID92, Q8LCE1	GSR2	ATGSR2, GLN1;2, GSR2	hypothetical protein	STRINGENT	STRINGENT	STRINGENT	YES	NO	YES	NO	3'UTR,3'UTR	3'UTR	3'UTR	3'UTR, 5'UTR, CDS	NO	NO
AT1G66240	F4ID99, Q94BT9, Q94BT9-2	ATX1	ATATX1, ATX1	homolog of anti-oxidant 1	STRINGENT	STRINGENT	STRINGENT	YES	YES	YES	YES	3'UTR,3'UTR,3'UTR	NO	3'UTR	3'UTR	Stop codon	NO
AT1G66410	A0A1P8ANC4, F4IEU4, P0DH96	CAM4	ACAM-4, CAM4	calmodulin 4	STRINGENT	STRINGENT	STRINGENT	NO	YES	NO	YES	3'UTR,3'UTR,3'UTR,3'UTR,3'UTR,3'UTR,3'UTR	3'UTR	3'UTR	3'UTR	Stop codon	NO
AT1G66580	C0Z3F6, Q93W22	SAG24	RPL10C, SAG24	senescence associated gene 24	STRINGENT	STRINGENT	STRINGENT	YES	YES	YES	YES	3'UTR	3'UTR	3'UTR	3'UTR, CDS	NO	NO
AT1G67090	C0Z396, F4HRR5, P10795	RBCS1A	RBCS1A	ribulose bisphosphate carboxylase small chain 1A	STRINGENT	STRINGENT	STRINGENT	NO	YES	YES	YES	3'UTR,3'UTR	NO	3'UTR	5'UTR, 3'UTR, CDS	NO	NO
AT1G67250	Q94B05	AT1G67250		Proteasome maturation factor UMP1	STRINGENT	STRINGENT	STRINGENT	YES	YES	YES	YES	CDS,3'UTR	NO	3'UTR	3'UTR	NO	3'UTR
AT1G67350	Q9FYF8	AT1G67350		NADH-ubiquinone oxidoreductase	STRINGENT	STRINGENT	STRINGENT	YES	YES	YES	YES	3'UTR,3'UTR	NO	3'UTR	3'UTR	3' UTR	3'UTR
AT1G67430	F4HRW5, P51413	AT1G67430		Ribosomal protein L22p/L17e family protein	STRINGENT	STRINGENT	STRINGENT	YES	YES	YES	YES	3'UTR,3'UTR	NO	CDS, 3'UTR	3'UTR, 5'UTR	Stop codon	NO
AT1G67700	Q8LDL0, Q8LDL0-2, Q8LDL0-3	AT1G67700	HHL1	multidrug resistance protein	STRINGENT	STRINGENT	N.A.	YES	YES	NO	NO	3'UTR,3'UTR,3'UTR,3'UTR,3'UTR	NO	3'UTR	3'UTR	Stop codon	NO
AT1G67730	Q8L9C4	KCR1	ATKCR1, KCR1, YBR159	beta-ketoacyl reductase 1	STRINGENT	STRINGENT	STRINGENT	YES	YES	YES	YES	3'UTR	NO	3'UTR	3'UTR	NO	3'UTR
AT1G67740	O49347, Q8LAL4	PSBY	PSBY, YCF32	photosystem II BY	STRINGENT	STRINGENT	N.A.	NO	YES	NO	NO	3'UTR	NO	3'UTR	5'UTR, 3'UTR, CDS	NO	NO
AT1G67785	Q8VZ65	AT1G67785		hypothetical protein	STRINGENT	STRINGENT	STRINGENT	YES	YES	YES	YES	3'UTR	NO	3'UTR	3'UTR	Stop codon	NO
AT1G68010	A0A1P8ANC0, Q9C9W5, Q9C9W5-2	HPR	ATHPR1, HPR	hydroxypyruvate reductase	STRINGENT	STRINGENT	N.A.	YES	NO	NO	NO	CDS,CDS,3'UTR	3'UTR, CDS	3'UTR	3'UTR, 5'UTR, CDS	Stop codon	NO
AT1G68300	Q9C9G5	AT1G68300		Adenine nucleotide alpha hydrolases-like superfamily protein	STRINGENT	N.A.	STRINGENT	NO	NO	YES	NO	3'UTR	3'UTR	3'UTR	NO	NO	NO
AT1G68660	Q9SX29, Q9SX29-2	AT1G68660	AtClpS1, ClpS1	Ribosomal protein L12/ ATP-dependent Clp protease adaptor protein ClpS family protein	STRINGENT	STRINGENT	N.A.	YES	NO	NO	NO	3'UTR,3'UTR	NO	3'UTR	3'UTR	Stop codon	NO
AT1G68830	Q9S713	7	7	Serine/Threonine kinase domain protein	STRINGENT	STRINGENT	N.A.	YES	NO	NO	NO	3'UTR	NO	3'UTR	3'UTR	Stop codon	3'UTR
AT1G69510	Q9C787	AT1G69510		cAMP-regulated phosphoprotein 19-related protein	STRINGENT	STRINGENT	STRINGENT	YES	YES	YES	YES	5'UTR,5'UTR,5'UTR,5'UTR,5'UTR,3'UTR,3'UTR,3'UTR	NO	3'UTR	3'UTR	Stop codon	3'UTR
AT1G69620	Q9FE65	RPL34	RPL34	ribosomal protein L34	STRINGENT	STRINGENT	STRINGENT	YES	YES	YES	YES	CDS,3'UTR	NO	3'UTR	3'UTR	Stop codon	3'UTR
AT1G69740	Q9SFH9	HEMB1	ALAD1, HEMB1	Aldolase superfamily protein	STRINGENT	STRINGENT	N.A.	YES	YES	NO	NO	3'UTR,3'UTR,3'UTR	CDS	3'UTR	3'UTR, CDS	Stop codon	3'UTR
AT1G70310	O48661	SPDS2	SPDS2	spermidine synthase 2	STRINGENT	STRINGENT	STRINGENT	YES	YES	YES	YES	3'UTR	CDS	3'UTR	3'UTR	NO	3'UTR
AT1G70410	Q94CE4, Q94CE4-2	BCA4	ATBCA4, BCA4, CA4	beta carbonic anhydrase 4	STRINGENT	STRINGENT	STRINGENT	YES	YES	YES	NO	3'UTR,3'UTR,3'UTR	NO	3'UTR	3'UTR	Stop codon	NO
AT1G70490	Q9LQC8	ARFA1D	ARFA1D, ATARFA1D	Ras-related small GTP-binding family protein	STRINGENT	STRINGENT	STRINGENT	YES	YES	YES	YES	3'UTR,3'UTR,3'UTR,3'UTR,3'UTR,3'UTR,3'UTR	NO	3'UTR	3'UTR	Stop codon	NO
AT1G70580	Q9S7E9	AOAT2	AOAT2, GGT2	alanine-2-oxoglutarate aminotransferase 2	STRINGENT	STRINGENT	STRINGENT	YES	NO	YES	NO	3'UTR,3'UTR,3'UTR,3'UTR	NO	3'UTR	3'UTR	Stop codon	3'UTR
AT1G70600	P49637	AT1G70600		Ribosomal protein L18e/L15 superfamily protein	STRINGENT	STRINGENT	STRINGENT	YES	YES	YES	YES	3'UTR	NO	3'UTR	3'UTR, 5'UTR	NO	NO
AT1G70660	F4I6V4, Q9CAB6	MMZ2	MMZ2, UEV1B	MMS ZWEI homologue 2	STRINGENT	STRINGENT	STRINGENT	YES	YES	YES	YES	3'UTR,3'UTR	3'UTR	3'UTR	3'UTR	Stop codon	3'UTR
AT1G70760	Q9CAC5	NdhL	CRR23, NdhL	inorganic carbon transport protein-like protein	STRINGENT	STRINGENT	N.A.	YES	YES	NO	NO	3'UTR	NO	3'UTR	3'UTR	Stop codon	NO
AT1G70770	Q9S791	AT1G70770		transmembrane protein (Protein of unknown function DUF2359, transmembrane)	STRINGENT	STRINGENT	STRINGENT	YES	YES	YES	YES	3'UTR	NO	3'UTR	NO	Stop codon, coding_intron	3'UTR
AT1G71220	A0A178W3V2, A0A1P8AVX3, Q0WL80, Q0WL80-2	EBS1	EBS1, PSL2, UGGT	EMS-MUTAGENIZED BRI1 SUPPRESSOR 1	STRINGENT	STRINGENT	STRINGENT	YES	YES	YES	YES	3'UTR,3'UTR,3'UTR	3'UTR, StopCodon	NO	3'UTR	Stop codon	NO
AT1G71500	Q9C9I7	AT1G71500	LIL8, PSB33	Rieske (2Fe-2S) domain-containing protein	STRINGENT	STRINGENT	N.A.	YES	NO	NO	NO	3'UTR	3'UTR, CDS, StopCodon	3'UTR	3'UTR	Stop codon	NO
AT1G72020	Q9C7G5	AT1G72020		TonB-dependent heme receptor A	STRINGENT	STRINGENT	STRINGENT	YES	YES	YES	YES	3'UTR	NO	3'UTR	3'UTR	Stop codon	NO
AT1G72170	Q8GWC7	AT1G72170		MICOS complex subunit, putative (DUF543)	STRINGENT	STRINGENT	STRINGENT	YES	YES	YES	YES	3'UTR	3'UTR	3'UTR	3'UTR	Stop codon	3'UTR
AT1G72370	B9DG17, Q08682	P40	AP40, P40, RP40, RPSAA	40s ribosomal protein SA	STRINGENT	STRINGENT	STRINGENT	YES	YES	YES	YES	3'UTR,3'UTR	NO	3'UTR	3'UTR	Stop codon	NO
AT1G72550	F4IDD6, Q9SGE9	AT1G72550		tRNA synthetase beta subunit family protein	STRINGENT	STRINGENT	STRINGENT	YES	NO	YES	NO	3'UTR,3'UTR	NO	3'UTR	3'UTR	Stop codon	3'UTR
AT1G72710	Q9CAI5	CKL2	CKL2	casein kinase 1-like protein 2	STRINGENT	STRINGENT	STRINGENT	YES	NO	YES	YES	3'UTR	CDS	3'UTR	3'UTR	3' UTR	3'UTR
AT1G73060	Q8H0W0	LPA3	LPA3	Low PSII Accumulation 3	STRINGENT	STRINGENT	N.A.	YES	YES	NO	NO	3'UTR	3'UTR	3'UTR	3'UTR	Stop codon	3'UTR
AT1G73230	Q9CAT7	AT1G73230		Nascent polypeptide-associated complex NAC	STRINGENT	STRINGENT	STRINGENT	YES	YES	YES	YES	3'UTR	NO	3'UTR	3'UTR	Stop codon	NO
AT1G73430	F4HQ84	AT1G73430	COG3	sec34-like family protein	STRINGENT	STRINGENT	STRINGENT	YES	NO	YES	YES	3'UTR,3'UTR	3'UTR	3'UTR	3'UTR	NO	3'UTR
AT1G73650	A8MQG9, B3H655, B9DFE9, F4HRY1, Q940M8	AT1G73650		3-oxo-5-alpha-steroid 4-dehydrogenase (DUF1295)	STRINGENT	STRINGENT	STRINGENT	YES	YES	YES	YES	3'UTR,3'UTR,3'UTR,3'UTR,3'UTR	NO	3'UTR	3'UTR	NO	3'UTR
AT1G73990	A0A1P8AUG2, Q9C9C0	SPPA	SPPA, SPPA1	signal peptide peptidase	STRINGENT	STRINGENT	STRINGENT	YES	NO	YES	YES	CDS,3'UTR,3'UTR,3'UTR	NO	3'UTR	3'UTR	Stop codon	3'UTR
AT1G74040	A0A1P8AUZ8, A0A1P8AV04, Q9C550	IMS1	IMS1, IPMS2, MAML-3	2-isopropylmalate synthase 1	STRINGENT	STRINGENT	STRINGENT	YES	YES	YES	NO	3'UTR,3'UTR	NO	NO	3'UTR	NO	NO
AT1G74050	Q9C9C5	AT1G74050		Ribosomal protein L6 family protein	STRINGENT	STRINGENT	STRINGENT	YES	YES	YES	YES	3'UTR	NO	3'UTR, CDS	3'UTR, CDS, 5'UTR	Stop codon	NO
AT1G74060	Q9C9C6	AT1G74060		Ribosomal protein L6 family protein	STRINGENT	STRINGENT	STRINGENT	YES	YES	YES	YES	3'UTR	NO	3'UTR	3'UTR	Stop codon	3'UTR
AT1G74230	A0A178WFE3, Q9C909	GR-RBP5	GR-RBP5, ORRM4, RBGA2	glycine-rich RNA-binding protein 5	STRINGENT	STRINGENT	STRINGENT	YES	NO	YES	YES	3'UTR	NO	3'UTR	3'UTR	NO	3'UTR
AT1G74270	Q9C912	AT1G74270		Ribosomal protein L35Ae family protein	STRINGENT	STRINGENT	STRINGENT	YES	YES	YES	YES	3'UTR	NO	3'UTR	3'UTR	NO	3'UTR
AT1G74560	Q9CA59, Q9CA59-3	NRP1	NRP1	NAP1-related protein 1	STRINGENT	STRINGENT	STRINGENT	YES	YES	YES	YES	3'UTR,3'UTR	3'UTR	3'UTR	3'UTR	Stop codon	3'UTR
AT1G74790	Q9SSG3	AT1G74790		catalytics	STRINGENT	STRINGENT	STRINGENT	YES	NO	YES	YES	3'UTR	3'UTR	CDS, 3'UTR	NO	NO	3'UTR
AT1G74880	Q9S829	NdhO	NDH-O, NdhO	NAD(P)H:plastoquinone dehydrogenase complex subunit O	STRINGENT	STRINGENT	N.A.	YES	YES	NO	NO	3'UTR	3'UTR	3'UTR	3'UTR	NO	NO
AT1G74910	F4HXD1, Q9C9P3, Q9SSG7	AT1G74910	KJC1	ADP-glucose pyrophosphorylase family protein	STRINGENT	STRINGENT	STRINGENT	YES	YES	YES	YES	3'UTR,3'UTR,3'UTR	NO	3'UTR	3'UTR	Stop codon	3'UTR
AT1G74920	F4HXD2, Q9S795	ALDH10A8	ALDH10A8	aldehyde dehydrogenase 10A8	STRINGENT	STRINGENT	STRINGENT	YES	NO	YES	YES	3'UTR,3'UTR	NO	3'UTR	3'UTR	Stop codon	3'UTR
AT1G74960	A0A178WG16, Q9C9P4	FAB1	ATKAS2, FAB1, KAS2	fatty acid biosynthesis 1	STRINGENT	STRINGENT	STRINGENT	YES	YES	YES	YES	3'UTR,3'UTR	3'UTR, CDS	3'UTR	3'UTR	NO	3'UTR
AT1G74970	Q9XJ27	RPS9	RPS9, TWN3	ribosomal protein S9	STRINGENT	STRINGENT	STRINGENT	YES	YES	YES	NO	3'UTR	NO	3'UTR	3'UTR	Stop codon	NO
AT1G75220	Q9FRL3	ERDL6	AtERDL6, ERDL6	Major facilitator superfamily protein	STRINGENT	STRINGENT	STRINGENT	YES	YES	YES	YES	3'UTR	3'UTR	NO	3'UTR	Stop codon	3'UTR
AT1G75350	Q9FWS4	emb2184	emb2184	Ribosomal protein L31	STRINGENT	STRINGENT	N.A.	YES	YES	NO	NO	3'UTR	NO	3'UTR	3'UTR, 5'UTR	Stop codon	NO
AT1G75630	F4HZ57, P59229	AVA-P4	AVA-P4	vacuolar H -pumping ATPase 16 kDa proteolipid subunit 4	STRINGENT	STRINGENT	STRINGENT	YES	YES	YES	YES	3'UTR,3'UTR	NO	3'UTR	3'UTR	Stop codon	3'UTR
AT1G75660	Q9FQ03, Q9FQ03-2	XRN3	AtXRN3, XRN3	5'-3' exoribonuclease 3	STRINGENT	STRINGENT	STRINGENT	YES	YES	YES	YES	3'UTR	NO	3'UTR	3'UTR	NO	NO
AT1G75690	Q8GSJ6	LQY1	LQY1	DnaJ/Hsp40 cysteine-rich domain superfamily protein	STRINGENT	STRINGENT	N.A.	YES	YES	NO	NO	3'UTR	StopCodon, 3'UTR	3'UTR	3'UTR	Stop codon	NO
AT1G75950	Q39255	SKP1	ASK1, ATSKP1, SKP1, SKP1A, UIP1	S phase kinase-associated protein 1	STRINGENT	STRINGENT	STRINGENT	YES	YES	YES	YES	3'UTR	NO	3'UTR	3'UTR, 5'UTR	Stop codon	3'UTR
AT1G76010	Q93VA8	AT1G76010		Alba DNA/RNA-binding protein	STRINGENT	STRINGENT	STRINGENT	YES	YES	YES	YES	3'UTR,3'UTR	3'UTR	3'UTR	3'UTR	3' UTR	NO
AT1G76030	P11574	VAB1	AtVAB1, VAB1	ATPase, V1 complex, subunit B protein	STRINGENT	STRINGENT	STRINGENT	YES	NO	YES	YES	3'UTR	NO	3'UTR	3'UTR	Stop codon	NO
AT1G76160	Q9SGR6	sks5	sks5	SKU5 similar 5	STRINGENT	STRINGENT	STRINGENT	NO	YES	YES	YES	3'UTR	CDS, 3'UTR	3'UTR	NO	NO	NO
AT1G76200	Q8LDK3	AT1G76200		NADH dehydrogenase ubiquinone 1 beta subcomplex subunit	STRINGENT	STRINGENT	STRINGENT	YES	YES	YES	YES	3'UTR	NO	3'UTR	3'UTR	Stop codon	3'UTR
AT1G76490	C0Z3D4, P14891, P14891-2	HMG1	AtHMGR1, HMG1, HMGR1, MAD3	hydroxy methylglutaryl CoA reductase 1	STRINGENT	STRINGENT	STRINGENT	YES	YES	YES	YES	3'UTR	3'UTR	3'UTR	3'UTR, CDS	NO	NO
AT1G76860	Q9C6K5	LSM3B	LSM3B	Small nuclear ribonucleoprotein family protein	STRINGENT	STRINGENT	STRINGENT	YES	YES	YES	YES	3'UTR	NO	3'UTR	3'UTR	NO	3'UTR
AT1G77490	A0A1P8APU0, Q42593, Q56WP7	TAPX	TAPX	thylakoidal ascorbate peroxidase	STRINGENT	STRINGENT	N.A.	YES	YES	NO	NO	3'UTR	NO	3'UTR	CDS, 3'UTR	Stop codon	CDS, 3'UTR
AT1G77710	Q9CA23	CCP2	AtCCP2, CCP2	ubiquitin-fold modifier	STRINGENT	STRINGENT	STRINGENT	YES	YES	YES	YES	CDS,3'UTR	NO	3'UTR	3'UTR, CDS	Stop codon	3'UTR
AT1G77930	A0A178WEH4, A0A1P8ASJ9, Q9SH08	AT1G77930	DJC65	Chaperone DnaJ-domain superfamily protein	STRINGENT	STRINGENT	STRINGENT	YES	YES	YES	NO	3'UTR,3'UTR,3'UTR,3'UTR,3'UTR	NO	3'UTR	3'UTR	NO	3'UTR
AT1G77940	Q8VZ19	AT1G77940		Ribosomal protein L7Ae/L30e/S12e/Gadd45 family protein	STRINGENT	STRINGENT	STRINGENT	YES	YES	YES	YES	3'UTR	NO	3'UTR	3'UTR, 5'UTR	Stop codon	NO
AT1G78040	Q8LD45, Q9SGZ6	AT1G78040		Pollen Ole e 1 allergen and extensin family protein	STRINGENT	STRINGENT	STRINGENT	YES	YES	YES	YES	CDS,CDS,CDS,3'UTR,3'UTR,3'UTR	NO	CDS, 3'UTR	3'UTR, CDS, 5'UTR	NO	NO
AT1G78140	Q8LBV4	AT1G78140		S-adenosyl-L-methionine-dependent methyltransferases superfamily protein	STRINGENT	STRINGENT	N.A.	YES	NO	NO	NO	3'UTR	3'UTR	NO	3'UTR	NO	3'UTR
AT1G78380	Q9ZRW8	GSTU19	ATGSTU19, GST8, GSTU19	glutathione S-transferase TAU 19	STRINGENT	STRINGENT	STRINGENT	YES	YES	YES	YES	3'UTR	NO	3'UTR	3'UTR, 5'UTR, CDS	NO	NO
AT1G78630	Q9SYL9	emb1473	emb1473	Ribosomal protein L13 family protein	STRINGENT	STRINGENT	STRINGENT	YES	YES	YES	YES	3'UTR	NO	3'UTR	3'UTR, CDS	Stop codon	NO
AT1G78660	Q9SYL6, Q9SYL6-2	GGH1	ATGGH1, GGH1	gamma-glutamyl hydrolase 1	STRINGENT	STRINGENT	STRINGENT	YES	YES	YES	YES	3'UTR,3'UTR,3'UTR	NO	NO	3'UTR	Stop codon	3'UTR
AT1G78680	F4IBT7, O65355	GGH2	ATGGH2, GGH2	gamma-glutamyl hydrolase 2	STRINGENT	N.A.	STRINGENT	NO	NO	YES	NO	3'UTR,3'UTR	NO	3'UTR	3'UTR	Stop codon	3'UTR
AT1G78870	A0A1P8ARI0, A0A2H1ZEG2, Q94A97, Q94A97-2, Q94A97-3	UBC35	UBC13A, UBC35	ubiquitin-conjugating enzyme 35	STRINGENT	N.A.	STRINGENT	NO	NO	YES	NO	3'UTR,3'UTR,3'UTR,3'UTR	NO	3'UTR	3'UTR	3' UTR	3'UTR
AT1G78900	O23654, Q570K4	VHA-A	VHA-A	vacuolar ATP synthase subunit A	STRINGENT	STRINGENT	STRINGENT	YES	YES	YES	YES	3'UTR,3'UTR	NO	3'UTR	3'UTR	Stop codon	NO
AT1G79010	A0A178WD68, Q42599	AT1G79010		Alpha-helical ferredoxin	STRINGENT	STRINGENT	STRINGENT	YES	YES	YES	YES	3'UTR	NO	3'UTR	3'UTR	Stop codon	NO
AT1G79040	A0A178WGP6, C0Z2Y2, P27202	PSBR	PSBR	photosystem II subunit R	STRINGENT	STRINGENT	N.A.	NO	YES	NO	NO	CDS,3'UTR	NO	CDS, 3'UTR	3'UTR, CDS, 5'UTR	NO	NO
AT1G79075					STRINGENT	STRINGENT	STRINGENT	YES	YES	YES	YES	CDS,CDS	Noncoding	N.A.	N.A.	noncoding_exon	NO
AT1G79230	A0A178WKK0, A8MR47, O64530, O64530-2	MST1	ATMST1, ATRDH1, MST1, ST1, STR1	mercaptopyruvate sulfurtransferase 1	STRINGENT	STRINGENT	STRINGENT	YES	YES	YES	YES	3'UTR,3'UTR,3'UTR	NO	3'UTR	3'UTR	Stop codon	NO
AT1G79390	Q9SAK9	AT1G79390		centrosomal protein	STRINGENT	STRINGENT	STRINGENT	YES	YES	YES	YES	3'UTR	3'UTR	3'UTR	NO	NO	3'UTR
AT1G79530	Q9SAJ6	GAPCP-1	GAPCP-1	glyceraldehyde-3-phosphate dehydrogenase of plastid 1	STRINGENT	STRINGENT	STRINGENT	YES	YES	YES	YES	3'UTR	NO	NO	NO	3' UTR	3'UTR
AT1G79550	Q9SAJ4, Q9SAJ4-2	PGK	PGK, PGK3	phosphoglycerate kinase	STRINGENT	STRINGENT	STRINGENT	YES	YES	YES	YES	3'UTR,3'UTR	NO	3'UTR	3'UTR	Stop codon	NO
AT1G79600	Q9MA15, Q9MA15-2	AT1G79600	ABC1K3	Protein kinase superfamily protein	STRINGENT	STRINGENT	N.A.	YES	NO	NO	NO	3'UTR	3'UTR	3'UTR	3'UTR	Stop codon	3'UTR
AT1G79750	Q9CA83	NADP-ME4	ATNADP-ME4, NADP-ME4	NADP-malic enzyme 4	STRINGENT	STRINGENT	STRINGENT	YES	YES	YES	YES	3'UTR	CDS	3'UTR	3'UTR	Stop codon	3'UTR
AT1G79850	P16180	RPS17	CS17, PDE347, PRPS17, RPS17	ribosomal protein S17	STRINGENT	STRINGENT	N.A.	YES	YES	NO	NO	3'UTR	3'UTR	3'UTR	3'UTR, CDS, 5'UTR	NO	NO
AT1G79990	F4HQE7, Q9CAA0	AT1G79990		coatomer subunit beta-2	STRINGENT	STRINGENT	STRINGENT	YES	NO	YES	YES	3'UTR,3'UTR	CDS, 3'UTR	NO	3'UTR	Stop codon	CDS, 3'UTR
AT1G80070	Q9SSD2	SUS2	EMB14, EMB177, EMB33, PRP8, SUS2	Pre-mRNA-processing-splicing factor	STRINGENT	STRINGENT	STRINGENT	YES	NO	YES	YES	3'UTR	3'UTR	3'UTR	3'UTR	Stop codon	3'UTR
AT1G80230	Q9SSB8	AT1G80230		Rubredoxin-like superfamily protein	STRINGENT	STRINGENT	STRINGENT	YES	NO	YES	YES	3'UTR	NO	3'UTR	3'UTR	Stop codon	3'UTR
AT1G80360	Q9C969	AT1G80360	ISS1, VAS1	Pyridoxal phosphate (PLP)-dependent transferases superfamily protein	STRINGENT	STRINGENT	STRINGENT	YES	NO	YES	YES	3'UTR,3'UTR,3'UTR,3'UTR	NO	3'UTR	3'UTR	NO	3'UTR
AT1G80380	A0A178W1J2, A0A1P8AMB3, A0A1P8AMB5, C0Z2X8, F4HS63, Q944I4, Q944I4-2, Q944I4-3	AT1G80380	GLYK	P-loop containing nucleoside triphosphate hydrolases superfamily protein	STRINGENT	STRINGENT	N.A.	YES	NO	NO	NO	3'UTR,3'UTR,3'UTR,3'UTR,3'UTR,3'UTR,3'UTR	NO	3'UTR	3'UTR	Stop codon	3'UTR
AT1G80600	Q9M8M7	WIN1	TUP5, WIN1	HOPW1-1-interacting 1	STRINGENT	STRINGENT	STRINGENT	YES	YES	YES	YES	3'UTR	NO	3'UTR	3'UTR	NO	3'UTR
AT2G01090	Q9SJV7	AT2G01090		Ubiquinol-cytochrome C reductase hinge protein	STRINGENT	STRINGENT	STRINGENT	YES	NO	YES	YES	3'UTR,3'UTR,3'UTR,3'UTR,3'UTR,3'UTR,3'UTR	3'UTR	3'UTR	3'UTR	Stop codon	3'UTR
AT2G01110	C0Z2T3, Q9SJV5	APG2	APG2, PGA2, TATC, UNE3	Sec-independent periplasmic protein translocase	STRINGENT	STRINGENT	N.A.	YES	NO	NO	NO	3'UTR	NO	3'UTR	3'UTR	Stop codon	3'UTR
AT2G01140	Q9ZU52	PDE345	AtFBA3, FBA3, PDE345	Aldolase superfamily protein	STRINGENT	STRINGENT	STRINGENT	YES	YES	YES	YES	3'UTR	NO	3'UTR	3'UTR	NO	NO
AT2G01250	A8MRH4, P60040	AT2G01250	RPL7B	Ribosomal protein L30/L7 family protein	STRINGENT	STRINGENT	STRINGENT	YES	YES	YES	YES	3'UTR,3'UTR	NO	3'UTR	3'UTR	Stop codon	NO
AT2G01350	A8MRX1, A8MS71, F4INA0, Q56WI8, Q9ZU32	QPT	QPT	quinolinate phoshoribosyltransferase	STRINGENT	N.A.	STRINGENT	NO	NO	YES	YES	3'UTR,3'UTR,3'UTR,3'UTR	NO	NO	3'UTR	Stop codon	3'UTR
AT2G01470	Q39221	STL2P	ATSEC12, STL2P	SEC12P-like 2 protein	STRINGENT	STRINGENT	STRINGENT	YES	NO	YES	YES	3'UTR	3'UTR	NO	3'UTR	Stop codon	3'UTR
AT2G01490	Q9ZVF6	PAHX	PAHX	phytanoyl-CoA dioxygenase (PhyH) family protein	STRINGENT	STRINGENT	STRINGENT	YES	YES	YES	YES	3'UTR	NO	3'UTR	3'UTR	Stop codon	3'UTR
AT2G01690	F4IPA6, Q9ZU97	AT2G01690	VAC1	ARM repeat superfamily protein	STRINGENT	STRINGENT	STRINGENT	YES	NO	YES	NO	3'UTR,3'UTR	3'UTR	3'UTR	NO	Stop codon	3'UTR
AT2G01720	Q9ZUA0	AT2G01720	OST1a	Ribophorin I	STRINGENT	STRINGENT	STRINGENT	YES	NO	YES	YES	3'UTR	NO	3'UTR	3'UTR	Stop codon	3'UTR
AT2G02050	Q9SKC9	AT2G02050		NADH-ubiquinone oxidoreductase B18 subunit	STRINGENT	STRINGENT	STRINGENT	YES	YES	YES	YES	3'UTR	NO	3'UTR	3'UTR	3' UTR	3'UTR
AT2G02390	A0A178VWM4, A0A1P8B2F0, Q9ZVQ3, Q9ZVQ3-2	GSTZ1	ATGSTZ1, AtMAAI, GST18, GSTZ1, MAAI	glutathione S-transferase zeta 1	STRINGENT	N.A.	STRINGENT	NO	NO	YES	YES	3'UTR,3'UTR,3'UTR	NO	3'UTR	3'UTR	Stop codon	3'UTR
AT2G02510	O64725	AT2G02510		NADH dehydrogenase (ubiquinone)s	STRINGENT	STRINGENT	STRINGENT	YES	YES	YES	YES	3'UTR	NO	3'UTR	3'UTR	Stop codon	3'UTR
AT2G02560	Q8L5Y6, Q8L5Y6-2	CAND1	ATCAND1, CAND1, ETA2, HVE, TIP120	cullin-associated and neddylation dissociated	STRINGENT	N.A.	STRINGENT	NO	NO	YES	NO	3'UTR,3'UTR	NO	CDS	3'UTR	Stop codon	3'UTR
AT2G02760	P42745	UBC2	ATUBC2, UBC2	ubiquiting-conjugating enzyme 2	STRINGENT	STRINGENT	STRINGENT	YES	YES	YES	YES	3'UTR,3'UTR,3'UTR,3'UTR	NO	3'UTR	3'UTR	Stop codon	3'UTR
AT2G03120	O81062	SPP	ATSPP, SPP	signal peptide peptidase	STRINGENT	N.A.	STRINGENT	NO	NO	YES	YES	3'UTR	3'UTR	3'UTR	3'UTR	Stop codon	3'UTR
AT2G03680	Q9SJW3	SPR1	SKU6, SPR1	spiral1	STRINGENT	STRINGENT	STRINGENT	YES	NO	YES	YES	3'UTR,3'UTR	NO	3'UTR	3'UTR	NO	3'UTR
AT2G03870	Q9SI54	EMB2816	EMB2816, LSM7	Small nuclear ribonucleoprotein family protein	STRINGENT	STRINGENT	STRINGENT	YES	NO	YES	YES	3'UTR,3'UTR	NO	CDS, 3'UTR	3'UTR	Stop codon	3'UTR
AT2G04030	Q9SIF2, Q9SIF2-2	CR88	AtHsp90.5, AtHsp90C, CR88, EMB1956, Hsp88.1, HSP90.5	Chaperone protein htpG family protein	STRINGENT	STRINGENT	STRINGENT	YES	YES	YES	YES	3'UTR,3'UTR	3'UTR	3'UTR	3'UTR	Stop codon	3'UTR
AT2G04390	P49205	AT2G04390		Ribosomal S17 family protein	STRINGENT	STRINGENT	STRINGENT	YES	YES	YES	YES	3'UTR	NO	3'UTR	3'UTR	Stop codon	NO
AT2G04410	F4IV84	AT2G04410		RPM1-interacting protein 4 (RIN4) family protein	STRINGENT	N.A.	STRINGENT	NO	NO	YES	NO	3'UTR	NO	3'UTR	3'UTR	3' UTR	NO
AT2G04630	Q9SJ96	NRPB6B	NRPB6B, NRPE6B	RNA polymerase Rpb6	STRINGENT	STRINGENT	STRINGENT	YES	YES	YES	YES	3'UTR	NO	3'UTR	3'UTR	Stop codon	3'UTR
AT2G04700	A0A1P8AY16, Q9SJ89	AT2G04700	FTRB, INAP1	ferredoxin thioredoxin reductase catalytic beta chain family protein	STRINGENT	STRINGENT	STRINGENT	YES	YES	YES	YES	3'UTR,3'UTR	NO	3'UTR	3'UTR	Stop codon	3'UTR
AT2G04900	B3H468, Q8W470, Q9SI36	AT2G04900		hypothetical protein	STRINGENT	STRINGENT	STRINGENT	NO	YES	YES	YES	3'UTR	NO	3'UTR	3'UTR	Stop codon	3'UTR
AT2G05070	Q9S7J7	LHCB2.2	LHCB2, LHCB2.2	photosystem II light harvesting complex protein 2.2	STRINGENT	STRINGENT	N.A.	NO	YES	NO	NO	3'UTR	NO	3'UTR	5'UTR, CDS, 3'UTR	NO	NO
AT2G05220	Q9SJ36	AT2G05220		Ribosomal S17 family protein	STRINGENT	STRINGENT	STRINGENT	YES	YES	YES	YES	3'UTR,3'UTR	NO	3'UTR	3'UTR	NO	NO
AT2G05310	A0A1P8AYP6, Q9SJ31	AT2G05310		transmembrane protein	STRINGENT	STRINGENT	N.A.	YES	NO	NO	NO	3'UTR,3'UTR	3'UTR	3'UTR, CDS	3'UTR	Stop codon	NO
AT2G05620	Q9SL05	PGR5	AtPGR5, PGR5	proton gradient regulation 5	STRINGENT	STRINGENT	N.A.	YES	NO	NO	NO	3'UTR,3'UTR	NO	3'UTR	3'UTR	NO	NO
AT2G05710	Q9SIB9	ACO3	ACO3	aconitase 3	STRINGENT	STRINGENT	STRINGENT	YES	NO	YES	YES	3'UTR	3'UTR	3'UTR	3'UTR	3' UTR	NO
AT2G05830	A8MRP9, Q9ZUG4, Q9ZUG4-2	AT2G05830	MTI1	NagB/RpiA/CoA transferase-like superfamily protein	STRINGENT	STRINGENT	STRINGENT	YES	NO	YES	NO	3'UTR,3'UTR,3'UTR,3'UTR	NO	NO	3'UTR	Stop codon	3'UTR
AT2G05840	A0A1P8B073, F4IIA5, O81147	PAA2	PAA2	20S proteasome subunit PAA2	STRINGENT	STRINGENT	STRINGENT	YES	YES	YES	YES	3'UTR,3'UTR,3'UTR	NO	CDS, 3'UTR	3'UTR	3' UTR	3'UTR
AT2G07050	A0A1P8B2H6, P38605	CAS1	CAS1	cycloartenol synthase 1	STRINGENT	STRINGENT	STRINGENT	YES	YES	YES	YES	3'UTR,3'UTR	CDS	3'UTR	3'UTR	Stop codon	3'UTR
AT2G09990	Q9SK22	AT2G09990		Ribosomal protein S5 domain 2-like superfamily protein	STRINGENT	N.A.	STRINGENT	NO	NO	YES	YES	3'UTR	NO	3'UTR	3'UTR, CDS	NO	NO
AT2G11910	Q9SIY2	AT2G11910		hypothetical protein	STRINGENT	STRINGENT	STRINGENT	YES	YES	YES	YES	3'UTR,3'UTR	NO	3'UTR	3'UTR	Stop codon, CDS	3'UTR
AT2G13360	Q56YA5	AGT	AGT, AGT1, SGAT	alanine:glyoxylate aminotransferase	STRINGENT	STRINGENT	STRINGENT	YES	YES	YES	NO	3'UTR,3'UTR,3'UTR	NO	3'UTR	3'UTR, 5'UTR, CDS	NO	NO
AT2G13560	Q9SIU0	NAD-ME1	NAD-ME1	NAD-dependent malic enzyme 1	STRINGENT	STRINGENT	STRINGENT	YES	NO	YES	YES	3'UTR	NO	3'UTR	3'UTR	Stop codon	3'UTR
AT2G14285	Q570S3	AT2G14285		Small nuclear ribonucleoprotein family protein	STRINGENT	STRINGENT	N.A.	YES	NO	NO	NO	3'UTR	NO	3'UTR	3'UTR	NO	3'UTR
AT2G14890	Q3EC03, Q9C5S0	AGP9	AGP9	arabinogalactan protein 9	STRINGENT	STRINGENT	STRINGENT	YES	YES	YES	YES	3'UTR,3'UTR	NO	3'UTR	3'UTR	CDS, 3' UTR	NO
AT2G14910	C0Z2E0, F4IHF0, O82329	AT2G14910		MAR-binding filament-like protein	STRINGENT	STRINGENT	STRINGENT	YES	YES	YES	YES	3'UTR,3'UTR	3'UTR	3'UTR	3'UTR	3' UTR	NO
AT2G15290	Q9SHU7	TIC21	AtTic21, CIA5, PIC1, TIC21	translocon at inner membrane of chloroplasts 21	STRINGENT	STRINGENT	STRINGENT	YES	YES	YES	NO	3'UTR	NO	3'UTR	3'UTR	Stop codon	3'UTR
AT2G16510	P0DH93	AT2G16510		ATPase, F0/V0 complex, subunit C protein	STRINGENT	STRINGENT	STRINGENT	YES	YES	YES	YES	3'UTR	NO	3'UTR	3'UTR	3' UTR	3'UTR
AT2G16950	Q8H0U4, Q8H0U4-2	TRN1	ATTRN1, TRN1	transportin 1	STRINGENT	STRINGENT	STRINGENT	YES	YES	YES	YES	3'UTR,3'UTR	3'UTR	3'UTR	3'UTR	3' UTR	3'UTR
AT2G17190	A0A178VQC8, Q9SII9	AT2G17190	DSK2a	ubiquitin family protein	STRINGENT	STRINGENT	STRINGENT	YES	YES	YES	YES	3'UTR	NO	3'UTR	3'UTR	Stop codon	NO
AT2G17200	A0A178VV70, Q9SII8	DSK2	DSK2, DSK2b	ubiquitin family protein	STRINGENT	STRINGENT	STRINGENT	YES	NO	YES	NO	3'UTR	NO	3'UTR	3'UTR	Stop codon	3'UTR
AT2G17340	Q949P3	AT2G17340		pantothenate kinase	STRINGENT	STRINGENT	STRINGENT	YES	NO	YES	NO	3'UTR	NO	3'UTR	3'UTR	Stop codon	3'UTR
AT2G17360	A0A178VWY7, F4IMI7, Q93VH9	AT2G17360		Ribosomal protein S4 (RPS4A) family protein	STRINGENT	STRINGENT	STRINGENT	YES	YES	YES	YES	3'UTR,3'UTR	NO	3'UTR	3'UTR, CDS	Stop codon	NO
AT2G17380	Q8LEZ8	AP19	AP19	associated protein 19	STRINGENT	STRINGENT	STRINGENT	YES	YES	YES	YES	3'UTR	NO	3'UTR	3'UTR	Stop codon	3'UTR
AT2G17420	A0A1P8AZS7, Q39242	NTRA	ATNTRA, NTR2, NTRA	NADPH-dependent thioredoxin reductase A	STRINGENT	STRINGENT	STRINGENT	YES	YES	YES	YES	3'UTR,3'UTR	CDS	3'UTR	3'UTR	Stop codon	3'UTR
AT2G17560	Q42344, Q42344-2	HMGB4	HMGB4, NFD04, NFD4	high mobility group B4	STRINGENT	STRINGENT	STRINGENT	YES	YES	YES	YES	3'UTR,3'UTR,3'UTR	NO	3'UTR	3'UTR	Stop codon	3'UTR
AT2G17720	Q24JN5	P4H5	P4H5	2-oxoglutarate (2OG) and Fe(II)-dependent oxygenase superfamily protein	STRINGENT	STRINGENT	STRINGENT	YES	NO	YES	YES	3'UTR	NO	NO	NO	NO	3'UTR
AT2G18020	P46286	EMB2296	EMB2296	Ribosomal protein L2 family	STRINGENT	STRINGENT	STRINGENT	YES	YES	YES	YES	3'UTR	NO	3'UTR	3'UTR	NO	NO
AT2G18040	Q9SL42	PIN1AT	PIN1AT	peptidylprolyl cis/trans isomerase, NIMA-interacting 1	STRINGENT	STRINGENT	STRINGENT	YES	YES	YES	YES	3'UTR	NO	3'UTR	3'UTR	3' UTR	3'UTR
AT2G18110	Q9SI20	AT2G18110		Translation elongation factor EF1B/ribosomal protein S6 family protein	STRINGENT	STRINGENT	STRINGENT	YES	YES	YES	YES	3'UTR	3'UTR	3'UTR	3'UTR	NO	3'UTR
AT2G18230	P21216	PPa2	AtPPa2, PPa2	pyrophosphorylase 2	STRINGENT	STRINGENT	STRINGENT	YES	NO	YES	YES	3'UTR	NO	NO	3'UTR	Stop codon	3'UTR
AT2G18280	Q8GVE5	TLP2	AtTLP2, TLP2	tubby like protein 2	STRINGENT	STRINGENT	STRINGENT	YES	NO	YES	YES	3'UTR,3'UTR	NO	3'UTR	3'UTR	NO	3'UTR
AT2G18290	A0A178VVV9, Q9ZPW2	APC10	APC10, AtAPC10, EMB2783	anaphase promoting complex 10	STRINGENT	STRINGENT	STRINGENT	YES	NO	YES	NO	3'UTR	NO	NO	3'UTR	NO	3'UTR
AT2G18710	Q38885	SCY1	SCY1	SECY homolog 1	STRINGENT	STRINGENT	STRINGENT	YES	NO	YES	NO	3'UTR	NO	3'UTR	3'UTR	Stop codon	3'UTR
AT2G18740	A8MRL6, Q9ZV45	AT2G18740	PCP	Small nuclear ribonucleoprotein family protein	STRINGENT	STRINGENT	STRINGENT	YES	YES	YES	YES	3'UTR,3'UTR,3'UTR	NO	3'UTR	3'UTR	3' UTR	3'UTR
AT2G18960	A0A1P8AYX4, P20649	HA1	AHA1, HA1, OST2, PMA	H[ ]-ATPase 1	STRINGENT	STRINGENT	STRINGENT	YES	YES	YES	YES	3'UTR,3'UTR,3'UTR	NO	3'UTR	3'UTR	Stop codon	NO
AT2G19680	O82209	AT2G19680		Mitochondrial ATP synthase subunit G protein	STRINGENT	STRINGENT	STRINGENT	YES	YES	YES	YES	3'UTR,3'UTR	NO	3'UTR	NO	Stop codon	3'UTR
AT2G19730	O82204	AT2G19730		Ribosomal L28e protein family	STRINGENT	STRINGENT	STRINGENT	YES	YES	YES	YES	3'UTR,3'UTR,3'UTR	NO	3'UTR	3'UTR	Stop codon	NO
AT2G19740	Q9SLL7	AT2G19740		Ribosomal protein L31e family protein	STRINGENT	STRINGENT	STRINGENT	YES	YES	YES	YES	3'UTR	NO	3'UTR	3'UTR	Stop codon	NO
AT2G19750	P49689	AT2G19750		Ribosomal protein S30 family protein	STRINGENT	STRINGENT	STRINGENT	YES	YES	YES	YES	3'UTR	NO	3'UTR	3'UTR	Stop codon	3'UTR
AT2G19760	Q42449	PRF1	PFN1, PRF1	profilin 1	STRINGENT	STRINGENT	STRINGENT	YES	NO	YES	YES	3'UTR	NO	3'UTR	3'UTR, 5'UTR	NO	NO
AT2G19790	A0A178VXA6, O82201	AT2G19790	AP4S	SNARE-like superfamily protein	STRINGENT	STRINGENT	STRINGENT	YES	NO	YES	YES	3'UTR	NO	CDS, 3'UTR	3'UTR	Stop codon	3'UTR
AT2G19830	A0A178VNU1, A0A2H1ZE15, O82197	SNF7.2	SNF7.2, VPS32	SNF7 family protein	STRINGENT	STRINGENT	STRINGENT	YES	YES	YES	YES	3'UTR,3'UTR	3'UTR	3'UTR	3'UTR	Stop codon	3'UTR
AT2G19940	A0A1P8B108	AT2G19940		Putative N-acetyl-gamma-glutamyl-phosphate reductase	STRINGENT	STRINGENT	STRINGENT	YES	YES	YES	YES	3'UTR,3'UTR,3'UTR	3'UTR	NO	3'UTR	Stop codon	3'UTR
AT2G20120					STRINGENT	STRINGENT	N.A.	YES	NO	NO	NO	3'UTR,3'UTR	NO	3'UTR	3'UTR	NO	3'UTR
AT2G20230	Q93XY5	AT2G20230		Tetraspanin family protein	STRINGENT	STRINGENT	STRINGENT	YES	NO	YES	YES	3'UTR	NO	3'UTR	3'UTR	Stop codon	3'UTR
AT2G20260	Q8LC58, Q9S714	PSAE-2	PSAE-2	photosystem I subunit E-2	STRINGENT	STRINGENT	N.A.	YES	YES	NO	NO	CDS,3'UTR	3'UTR	3'UTR	3'UTR, 5'UTR, CDS	Stop codon	NO
AT2G20280	Q9SK74	AT2G20280		Zinc finger C-x8-C-x5-C-x3-H type family protein	STRINGENT	STRINGENT	STRINGENT	YES	YES	YES	YES	3'UTR	CDS, 3'UTR	3'UTR	3'UTR	Stop codon	3'UTR
AT2G20360	Q9SK66	AT2G20360		NAD(P)-binding Rossmann-fold superfamily protein	STRINGENT	STRINGENT	STRINGENT	YES	YES	YES	YES	3'UTR	NO	3'UTR	3'UTR	Stop codon	3'UTR
AT2G20420	O82662	AT2G20420		ATP citrate lyase (ACL) family protein	STRINGENT	STRINGENT	STRINGENT	YES	YES	YES	YES	3'UTR	NO	3'UTR	3'UTR	Stop codon	NO
AT2G20450	Q9SIM4	AT2G20450		Ribosomal protein L14	STRINGENT	STRINGENT	STRINGENT	YES	YES	YES	YES	3'UTR	NO	3'UTR	3'UTR	Stop codon	3'UTR
AT2G20530	Q9SIL6	PHB6	ATPHB6, PHB6	prohibitin 6	STRINGENT	STRINGENT	STRINGENT	YES	YES	YES	YES	3'UTR,3'UTR	NO	3'UTR	NO	Stop codon	3'UTR
AT2G20570	A0A1P8B320, F4IVF9, Q9SIV3	GPRI1	ATGLK1, GLK1, GPRI1	GBF's pro-rich region-interacting factor 1	STRINGENT	STRINGENT	N.A.	YES	NO	NO	NO	3'UTR,3'UTR,3'UTR	3'UTR	3'UTR	3'UTR	NO	3'UTR
AT2G20820	Q9FEF9, Q9SKT5	AT2G20820		hypothetical protein	STRINGENT	STRINGENT	STRINGENT	YES	YES	YES	YES	3'UTR,CDS,3'UTR,3'UTR	NO	3'UTR	3'UTR, 5'UTR	Stop codon	3'UTR
AT2G20860	Q9ZWT1	LIP1	LIP1	lipoic acid synthase 1	STRINGENT	STRINGENT	STRINGENT	YES	YES	YES	YES	3'UTR,3'UTR,3'UTR,3'UTR,3'UTR	NO	3'UTR	3'UTR	Stop codon	3'UTR
AT2G20890	Q9SKT0	PSB29	PSB29, THF1	photosystem II reaction center PSB29 protein	STRINGENT	STRINGENT	N.A.	YES	YES	NO	NO	3'UTR	NO	3'UTR	3'UTR, CDS, 5'UTR	CDS, Stop codon	3'UTR
AT2G20920	Q9SKS8	AT2G20920		chaperone (DUF3353)	STRINGENT	STRINGENT	N.A.	YES	NO	NO	NO	3'UTR	NO	3'UTR	3'UTR	Stop codon	3'UTR
AT2G20990	F4IFM6, F4IFM7, Q9SKR2	SYTA	AtSYT1, ATSYTA, NTMC2T1.1, NTMC2TYPE1.1, SYT1, SYTA	synaptotagmin A	STRINGENT	STRINGENT	STRINGENT	YES	YES	YES	YES	3'UTR,3'UTR,3'UTR	NO	3'UTR	3'UTR, CDS	Stop codon	3'UTR
AT2G21045	Q8RUD6	AT2G21045	HAC1	Rhodanese/Cell cycle control phosphatase superfamily protein	STRINGENT	N.A.	STRINGENT	NO	NO	YES	YES	3'UTR	NO	NO	NO	NO	NO
AT2G21160	F4IGI4, P45434	AT2G21160		Translocon-associated protein (TRAP), alpha subunit	STRINGENT	STRINGENT	STRINGENT	YES	YES	YES	YES	3'UTR,3'UTR	NO	3'UTR	3'UTR, CDS	NO	3'UTR
AT2G21170	A8MRE8, Q9SKP6	TIM	PDTPI, TIM	triosephosphate isomerase	STRINGENT	STRINGENT	STRINGENT	YES	YES	YES	YES	3'UTR,3'UTR,3'UTR	NO	3'UTR	3'UTR, 5'UTR	Stop codon, CDS	NO
AT2G21290	Q9SJU8	AT2G21290		30S ribosomal protein S31	STRINGENT	STRINGENT	STRINGENT	YES	YES	YES	YES	3'UTR	NO	3'UTR	3'UTR	NO	3'UTR
AT2G21330	F4IGL5, F4IGL7, Q9SJU4	FBA1	AtFBA1, FBA1	fructose-bisphosphate aldolase 1	STRINGENT	STRINGENT	N.A.	YES	NO	NO	NO	3'UTR,3'UTR,3'UTR	3'UTR	3'UTR	3'UTR, 5'UTR, CDS	3' UTR	NO
AT2G21390	Q9SJT9	AT2G21390		Coatomer, alpha subunit	STRINGENT	STRINGENT	STRINGENT	YES	NO	YES	YES	3'UTR	NO	3'UTR	3'UTR	NO	3'UTR
AT2G21410	Q9SJT7	VHA-A2	VHA-A2	vacuolar proton ATPase A2	STRINGENT	STRINGENT	STRINGENT	YES	NO	YES	YES	3'UTR	NO	3'UTR	3'UTR	Stop codon	3'UTR
AT2G21580	F4IHJ8, Q9SIK2	AT2G21580		Ribosomal protein S25 family protein	STRINGENT	STRINGENT	STRINGENT	YES	YES	YES	YES	3'UTR,3'UTR	NO	3'UTR	3'UTR	NO	3'UTR
AT2G21600	O48671	RER1B	ATRER1B, RER1B	endoplasmatic reticulum retrieval protein 1B	STRINGENT	STRINGENT	STRINGENT	YES	NO	YES	YES	3'UTR	NO	3'UTR	3'UTR	Stop codon	3'UTR
AT2G21870	A0A178VU53, F4III4, Q9SJ12	MGP1	MGP1, PHI1	MALE GAMETOPHYTE DEFECTIVE 1	STRINGENT	STRINGENT	STRINGENT	YES	YES	YES	YES	CDS,3'UTR,3'UTR,3'UTR	NO	3'UTR	3'UTR	3' UTR	NO
AT2G21960	Q9SJ03	AT2G21960		transmembrane protein	STRINGENT	STRINGENT	STRINGENT	YES	YES	YES	NO	3'UTR	NO	CDS, 3'UTR	3'UTR, CDS	Stop codon	3'UTR
AT2G22425	Q944J0	AT2G22425		Microsomal signal peptidase 12 kDa subunit (SPC12)	STRINGENT	N.A.	STRINGENT	NO	NO	YES	YES	3'UTR,3'UTR	NO	3'UTR	3'UTR	NO	NO
AT2G22670	F4IKE6, F4IKE9, Q38826	IAA8	IAA8	indoleacetic acid-induced protein 8	STRINGENT	STRINGENT	STRINGENT	YES	YES	YES	YES	3'UTR,3'UTR,3'UTR,3'UTR,3'UTR	NO	3'UTR	3'UTR	Stop codon	3'UTR
AT2G22990	A8MQW0, A8MR78, F4IKK4, Q3EBW0, Q8RUW5, Q8RUW5-2	SNG1	SCPL8, SNG1	sinapoylglucose 1	STRINGENT	STRINGENT	STRINGENT	NO	YES	YES	NO	3'UTR,3'UTR,3'UTR,3'UTR,3'UTR,3'UTR	3'UTR	3'UTR	3'UTR, CDS	NO	3'UTR
AT2G23070	O64816	AT2G23070	CKA4, cpCK2	Protein kinase superfamily protein	STRINGENT	STRINGENT	STRINGENT	YES	NO	YES	YES	3'UTR	CDS	3'UTR	3'UTR	Stop codon	3'UTR
AT2G23090	O64818	AT2G23090		Uncharacterized protein family SERF	STRINGENT	STRINGENT	STRINGENT	YES	YES	YES	YES	5'UTR,3'UTR	NO	3'UTR	3'UTR, 5'UTR	Stop codon	NO
AT2G23310	F4ILI9, Q9ZWI7	ATRER1C1	ATRER1C1	Rer1 family protein	STRINGENT	STRINGENT	STRINGENT	YES	NO	YES	YES	3'UTR,3'UTR	NO	3'UTR	3'UTR	3' UTR	3'UTR
AT2G23350	O22173, Q56WT6	4	PAB4, PABP4	poly(A) binding protein 4	STRINGENT	STRINGENT	STRINGENT	YES	YES	YES	YES	3'UTR	CDS	3'UTR	3'UTR	Stop codon	3'UTR
AT2G23930	A0A178VSP2, A8MSG1, O82221	SNRNP-G	SNRNP-G	Putative small nuclear ribonucleoprotein G	STRINGENT	STRINGENT	STRINGENT	YES	YES	YES	YES	CDS,CDS,3'UTR,3'UTR	NO	3'UTR	3'UTR	Stop codon	3'UTR
AT2G24020	O82230, O82230-2	AT2G24020	STIC2	Putative BCR, YbaB family COG0718	STRINGENT	STRINGENT	STRINGENT	YES	YES	YES	NO	3'UTR,3'UTR	NO	3'UTR	3'UTR	Stop codon	NO
AT2G24090	Q8VZ55	PRPL35	PRPL35	Ribosomal protein L35	STRINGENT	STRINGENT	STRINGENT	YES	YES	YES	YES	3'UTR	3'UTR	3'UTR	3'UTR, 5'UTR	Stop codon	3'UTR
AT2G24200	F4INR3, P30184, Q56WM8	LAP1	atLAP1, LAP1	Cytosol aminopeptidase family protein	STRINGENT	STRINGENT	STRINGENT	YES	NO	YES	YES	3'UTR,3'UTR,3'UTR	3'UTR	3'UTR	3'UTR	Stop codon	NO
AT2G24420	Q9ZQ26	AT2G24420		DNA repair ATPase-like protein	STRINGENT	STRINGENT	STRINGENT	YES	YES	YES	YES	3'UTR,3'UTR	NO	3'UTR	3'UTR	NO	3'UTR
AT2G24940	Q9SK39	MAPR2	AtMAPR2, MAPR2	membrane-associated progesterone binding protein 2	STRINGENT	STRINGENT	STRINGENT	YES	YES	YES	YES	3'UTR	NO	3'UTR	3'UTR	Stop codon	NO
AT2G25080	P52032	GPX1	ATGPX1, GPX1, GPXL1	glutathione peroxidase 1	STRINGENT	STRINGENT	STRINGENT	YES	NO	YES	NO	3'UTR	3'UTR	3'UTR	3'UTR, CDS, 5'UTR	Stop codon	NO
AT2G25210					STRINGENT	STRINGENT	STRINGENT	NO	YES	NO	YES	3'UTR	NO	3'UTR	3'UTR	Stop codon	NO
AT2G25310	Q84JM6	AT2G25310		ER membrane protein complex subunit-like protein (DUF2012)	STRINGENT	STRINGENT	STRINGENT	YES	YES	YES	YES	3'UTR	NO	3'UTR	3'UTR	Stop codon	3'UTR
AT2G25610	A0A1P8B2H2, Q9SLA2	AT2G25610		ATPase, F0/V0 complex, subunit C protein	STRINGENT	STRINGENT	STRINGENT	YES	NO	YES	YES	3'UTR,3'UTR	NO	3'UTR	3'UTR	NO	NO
AT2G25670	Q8LFB4, Q9SL96	AT2G25670		hypothetical protein	STRINGENT	STRINGENT	STRINGENT	YES	YES	YES	YES	3'UTR,3'UTR	NO	3'UTR	3'UTR	NO	3'UTR
AT2G26080	O80988	GLDP2	AtGLDP2, GLDP2	glycine decarboxylase P-protein 2	STRINGENT	STRINGENT	STRINGENT	YES	NO	YES	YES	3'UTR	NO	3'UTR	3'UTR	Stop codon	NO
AT2G26210	A8MR72, O64849, Q8VZ34	AT2G26210		Ankyrin repeat family protein	STRINGENT	STRINGENT	STRINGENT	NO	YES	YES	YES	3'UTR,3'UTR,3'UTR,3'UTR,3'UTR,3'UTR,3'UTR	NO	3'UTR	3'UTR, CDS, 5'UTR	NO	3'UTR
AT2G26230	O04420	AT2G26230	UOX	uricase / urate oxidase / nodulin 35	STRINGENT	N.A.	STRINGENT	NO	NO	YES	NO	3'UTR	NO	NO	3'UTR	NO	3'UTR
AT2G26240	O64847	AT2G26240		Transmembrane proteins 14C	STRINGENT	STRINGENT	STRINGENT	YES	YES	YES	YES	3'UTR	NO	3'UTR	3'UTR	NO	NO
AT2G26250	Q570B4	KCS10	FDH, KCS10	3-ketoacyl-CoA synthase 10	STRINGENT	STRINGENT	N.A.	YES	NO	NO	NO	3'UTR	NO	NO	3'UTR	NO	NO
AT2G26500	A8MQ99, O48717, Q9SZY6	AT2G26500		cytochrome b6f complex subunit (petM)	STRINGENT	STRINGENT	N.A.	YES	YES	NO	NO	3'UTR,3'UTR,3'UTR	3'UTR	3'UTR	3'UTR, 5'UTR, CDS	NO	NO
AT2G26670	O48782, O48782-2	TED4	ATHO1, GUN2, HO1, HY1, HY6, TED4	Plant heme oxygenase (decyclizing) family protein	STRINGENT	STRINGENT	N.A.	YES	NO	NO	NO	3'UTR,3'UTR	NO	3'UTR	3'UTR	CDS	NO
AT2G26900	Q1EBV7	BASS2	BASS2	Sodium Bile acid symporter family	STRINGENT	STRINGENT	STRINGENT	YES	YES	YES	YES	3'UTR	NO	3'UTR	3'UTR	3' UTR	3'UTR
AT2G26910	O81016	ABCG32	ABCG32, AtABCG32, ATPDR4, PDR4, PEC1	pleiotropic drug resistance 4	STRINGENT	STRINGENT	N.A.	YES	YES	NO	NO	3'UTR	NO	3'UTR	3'UTR	Stop codon	NO
AT2G26990	Q56WM0, Q8W207	FUS12	ATCSN2, COP12, CSN2, FUS12	proteasome family protein	STRINGENT	STRINGENT	STRINGENT	YES	YES	YES	YES	3'UTR	NO	3'UTR	3'UTR	Stop codon	3'UTR
AT2G27020	A0A1P8AX55, O23715	PAG1	PAG1	20S proteasome alpha subunit G1	STRINGENT	STRINGENT	STRINGENT	YES	YES	YES	YES	3'UTR,3'UTR	NO	3'UTR	3'UTR	Stop codon	NO
AT2G27190	Q38924, Q8LBA2	PAP12	ATPAP12, PAP12	purple acid phosphatase 12	STRINGENT	N.A.	STRINGENT	NO	NO	YES	YES	3'UTR	NO	3'UTR	3'UTR	NO	NO
AT2G27290	Q9XIN6	AT2G27290		FAM210B-like protein, putative (DUF1279)	STRINGENT	STRINGENT	N.A.	YES	NO	NO	NO	3'UTR	NO	3'UTR	3'UTR	Stop codon	NO
AT2G27530	P59230	PGY1	PGY1	Ribosomal protein L1p/L10e family	STRINGENT	STRINGENT	STRINGENT	YES	YES	YES	YES	3'UTR,3'UTR	NO	3'UTR	3'UTR, 5'UTR	Stop codon	NO
AT2G27600	Q9ZNT0	SKD1	ATSKD1, SKD1, VPS4	AAA-type ATPase family protein	STRINGENT	STRINGENT	STRINGENT	YES	YES	YES	YES	3'UTR	NO	3'UTR	3'UTR, 5'UTR	Stop codon	3'UTR
AT2G27680	Q9ZUX0	AT2G27680		NAD(P)-linked oxidoreductase superfamily protein	STRINGENT	STRINGENT	N.A.	YES	NO	NO	NO	3'UTR	NO	3'UTR	3'UTR, CDS	Stop codon	3'UTR
AT2G27710	F4IGR3, Q9SLF7	AT2G27710		60S acidic ribosomal protein family	STRINGENT	STRINGENT	STRINGENT	YES	YES	YES	YES	3'UTR,3'UTR,3'UTR,3'UTR	NO	3'UTR	3'UTR, CDS	NO	NO
AT2G27720	A0A1P8B2C7, F4IGR4, F4IGR5, P51407	AT2G27720		60S acidic ribosomal protein family	STRINGENT	STRINGENT	STRINGENT	YES	YES	YES	YES	3'UTR,3'UTR,3'UTR,3'UTR	NO	3'UTR	3'UTR, 5'UTR	Stop codon	NO
AT2G27730	A0A178VUX0, Q9ZUX4	AT2G27730		copper ion binding protein	STRINGENT	STRINGENT	STRINGENT	YES	YES	YES	YES	CDS,CDS,CDS,CDS,3'UTR,3'UTR,3'UTR,3'UTR	NO	3'UTR	3'UTR	Stop codon	NO
AT2G27860	Q9ZUY6	AXS1	AXS1	UDP-D-apiose/UDP-D-xylose synthase 1	STRINGENT	STRINGENT	STRINGENT	YES	YES	YES	YES	3'UTR	3'UTR	3'UTR	3'UTR	3' UTR	3'UTR
AT2G27960	O23249	CKS1	CKS1, CKS1AT	cyclin-dependent kinase-subunit 1	STRINGENT	STRINGENT	STRINGENT	YES	YES	YES	YES	3'UTR	3'UTR	3'UTR	3'UTR	NO	3'UTR
AT2G28000	P21238	CPN60A	CH-CPN60A, CPN60A, Cpn60alpha1, CPNA1, SLP	chaperonin-60alpha	STRINGENT	STRINGENT	STRINGENT	YES	YES	YES	YES	3'UTR	3'UTR, CDS	3'UTR	3'UTR	NO	NO
AT2G28370	Q9SKN3	AT2G28370	CASPL5A2	Uncharacterized protein family (UPF0497)	STRINGENT	STRINGENT	STRINGENT	YES	YES	YES	YES	3'UTR	NO	3'UTR	3'UTR	Stop codon	3'UTR
AT2G28390	Q9SKN1	AT2G28390	MON1	SAND family protein	STRINGENT	STRINGENT	STRINGENT	YES	NO	YES	NO	3'UTR	StopCodon, 3'UTR	3'UTR	3'UTR	NO	3'UTR
AT2G28520	A0A178VYP7, Q8RWZ7	VHA-A1	VHA-A1	vacuolar proton ATPase A1	STRINGENT	N.A.	STRINGENT	NO	NO	YES	YES	3'UTR	NO	NO	3'UTR	Stop codon	3'UTR
AT2G28800	B3H4X4, F4IJM1, Q8LBP4, Q8LBP4-2	ALB3	ALB3	63 kDa inner membrane family protein	STRINGENT	STRINGENT	STRINGENT	YES	YES	YES	NO	3'UTR,3'UTR,3'UTR	3'UTR, CDS, 5'UTR	3'UTR	3'UTR, CDS	Stop codon	NO
AT2G28910	Q84Y18	CXIP4	CXIP4	CAX interacting protein 4	STRINGENT	STRINGENT	STRINGENT	YES	YES	YES	YES	3'UTR,3'UTR,3'UTR	NO	3'UTR	3'UTR	NO	3'UTR
AT2G29400	P30366	TOPP1	PP1-AT, TOPP1	type one protein phosphatase 1	STRINGENT	STRINGENT	STRINGENT	YES	YES	YES	YES	3'UTR	NO	3'UTR	3'UTR	NO	3'UTR
AT2G29530	F4IKQ3, Q9ZW33	TIM10	AtTIM10, TIM10	Tim10/DDP family zinc finger protein	STRINGENT	STRINGENT	STRINGENT	YES	YES	YES	YES	3'UTR,3'UTR,3'UTR	NO	3'UTR	3'UTR	Stop codon	3'UTR
AT2G29650	A0A1P8B2Z7, O82390, O82390-2, O82390-3	PHT4;1	ANTR1, PHT4;1	phosphate transporter 4;1	STRINGENT	STRINGENT	STRINGENT	YES	YES	YES	NO	3'UTR,3'UTR,3'UTR,3'UTR	NO	3'UTR	3'UTR	NO	3'UTR
AT2G29960	Q8LDP4, Q8LDP4-2	5	ATCYP5, CYP19-4, CYP5	cyclophilin 5	STRINGENT	STRINGENT	STRINGENT	YES	YES	YES	YES	3'UTR,3'UTR,3'UTR	3'UTR	3'UTR	3'UTR	Stop codon	NO
AT2G30050	O64740	AT2G30050		transducin family protein / WD-40 repeat family protein	STRINGENT	STRINGENT	STRINGENT	YES	YES	YES	YES	3'UTR	NO	3'UTR	3'UTR	NO	NO
AT2G30110	P93028, Q570K3	UBA1	ATUBA1, MOS5, UBA1	ubiquitin-activating enzyme 1	STRINGENT	STRINGENT	STRINGENT	YES	YES	YES	YES	3'UTR	3'UTR	3'UTR	3'UTR	Stop codon	NO
AT2G30200	F4IMR0, Q8RU07	EMB3147	EMB3147	EMBRYO DEFECTIVE 3147	STRINGENT	STRINGENT	STRINGENT	YES	YES	YES	YES	3'UTR,3'UTR	NO	3'UTR	3'UTR	3' UTR	NO
AT2G30410	O04350	KIS	KIS, TFCA	tubulin folding cofactor A (KIESEL)	STRINGENT	STRINGENT	STRINGENT	YES	YES	YES	YES	3'UTR,3'UTR,3'UTR	NO	3'UTR	5'UTR, 3'UTR	Stop codon	3'UTR
AT2G30440	O04348	TPP	Plsp2B, TPP	thylakoid processing peptide	STRINGENT	STRINGENT	STRINGENT	YES	NO	YES	YES	3'UTR	NO	3'UTR	3'UTR	3' UTR	NO
AT2G30530	O04342	AT2G30530	MadA4	zinc finger CCCH domain protein	STRINGENT	N.A.	STRINGENT	NO	NO	YES	YES	3'UTR	3'UTR	NO	NO	NO	3'UTR
AT2G30570	Q39194, Q944K9	PSBW	PSBW	photosystem II reaction center W	STRINGENT	STRINGENT	N.A.	YES	YES	NO	NO	3'UTR	NO	3'UTR	3'UTR, 5'UTR, CDS	NO	NO
AT2G30950	A0A1P8AXC1, O80860	VAR2	FTSH2, VAR2	FtsH extracellular protease family	STRINGENT	STRINGENT	N.A.	YES	NO	NO	NO	3'UTR	NO	3'UTR	3'UTR, 5'UTR, CDS	Stop codon	NO
AT2G30970	P46643, Q56YR4	ASP1	ASP1	aspartate aminotransferase 1	STRINGENT	STRINGENT	STRINGENT	YES	YES	YES	YES	3'UTR,3'UTR	NO	3'UTR	3'UTR	Stop codon	3'UTR
AT2G30980	Q39010	SKdZeta	ASKdZeta, ATSK2-2, ATSK23, BIL1, SKdZeta	SHAGGY-related protein kinase dZeta	STRINGENT	STRINGENT	STRINGENT	YES	YES	YES	YES	3'UTR	NO	3'UTR	3'UTR	3' UTR	3'UTR
AT2G31350	A0A1P8AZ54, Q9SID3, Q9SID3-2	GLX2-5	GLX2-5	glyoxalase 2-5	STRINGENT	STRINGENT	STRINGENT	YES	YES	YES	YES	3'UTR,3'UTR,3'UTR	NO	3'UTR	3'UTR	NO	3'UTR
AT2G31490	Q9SIQ8	AT2G31490		neuronal acetylcholine receptor subunit alpha-5	STRINGENT	STRINGENT	STRINGENT	YES	YES	YES	YES	3'UTR	3'UTR	3'UTR	3'UTR	Stop codon	3'UTR
AT2G31570	C0Z303, O04922	GPX2	ATGPX2, GPX2, GPXL2	glutathione peroxidase 2	STRINGENT	STRINGENT	STRINGENT	YES	YES	YES	YES	3'UTR	NO	3'UTR	3'UTR	NO	3'UTR
AT2G31610	Q9SIP7	AT2G31610		Ribosomal protein S3 family protein	STRINGENT	STRINGENT	STRINGENT	YES	YES	YES	YES	3'UTR	5'UTR, CDS	3'UTR	3'UTR	Stop codon	NO
AT2G32060	Q9SKZ3	AT2G32060		Ribosomal protein L7Ae/L30e/S12e/Gadd45 family protein	STRINGENT	STRINGENT	STRINGENT	YES	YES	YES	YES	3'UTR,3'UTR,3'UTR	NO	3'UTR	3'UTR	NO	NO
AT2G32090	F4ISS2, Q9SKZ0	AT2G32090	GLXI-like;9	Lactoylglutathione lyase / glyoxalase I family protein	STRINGENT	STRINGENT	STRINGENT	YES	NO	YES	YES	3'UTR,3'UTR	3'UTR	NO	3'UTR	NO	NO
AT2G32170	F4IST2, Q8RWX2	AT2G32170	EXPRS	S-adenosyl-L-methionine-dependent methyltransferases superfamily protein	STRINGENT	STRINGENT	STRINGENT	YES	NO	YES	YES	3'UTR,3'UTR	NO	3'UTR	3'UTR	Stop codon	3'UTR
AT2G32600	O80897	AT2G32600		hydroxyproline-rich glycoprotein family protein	STRINGENT	STRINGENT	STRINGENT	YES	YES	YES	YES	3'UTR	NO	3'UTR	3'UTR	Stop codon	3'UTR
AT2G32720	A0A1P8AX49, O48845	CB5-B	ATCB5-B, B5 #4, CB5-B, CYTB5-D	cytochrome B5 isoform B	STRINGENT	STRINGENT	STRINGENT	YES	YES	YES	YES	3'UTR,3'UTR	3'UTR	3'UTR	NO	NO	3'UTR
AT2G32730	O48844	AT2G32730		26S proteasome regulatory complex, non-ATPase subcomplex, Rpn2/Psmd1 subunit	STRINGENT	STRINGENT	STRINGENT	YES	YES	YES	YES	3'UTR	NO	3'UTR	3'UTR	Stop codon	3'UTR
AT2G32920	O48773	PDIL2-3	ATPDI9, ATPDIL2-3, PDI9, PDIL2-3	PDI-like 2-3	STRINGENT	STRINGENT	STRINGENT	YES	YES	YES	YES	3'UTR	NO	3'UTR	3'UTR	Stop codon	NO
AT2G32950	A0A178VZ22, A0A1P8B2S1, P43254, Q0WV93	1	ATCOP1, COP1, DET340, EMB168, FUS1	Transducin/WD40 repeat-like superfamily protein	STRINGENT	STRINGENT	STRINGENT	YES	NO	YES	NO	3'UTR,3'UTR	3'UTR	3'UTR	3'UTR	Stop codon	3'UTR
AT2G33040	A0A178W0Z6, Q96250	ATP3	ATP3	gamma subunit of Mt ATP synthase	STRINGENT	STRINGENT	STRINGENT	YES	YES	YES	YES	3'UTR	NO	3'UTR	3'UTR	Stop codon	3'UTR
AT2G33120	B9DH97, F4IVQ2, P47192	1	ATVAMP722, SAR1, VAMP722	synaptobrevin-related protein 1	STRINGENT	N.A.	STRINGENT	NO	NO	YES	NO	3'UTR,3'UTR,3'UTR	NO	3'UTR	3'UTR	NO	3'UTR
AT2G33150	Q56WD9	PKT3	KAT2, PED1, PKT3	peroxisomal 3-ketoacyl-CoA thiolase 3	STRINGENT	STRINGENT	STRINGENT	YES	YES	YES	YES	3'UTR	NO	3'UTR	3'UTR	NO	NO
AT2G33210	F4IVR2, Q8L7B5	HSP60-2	HSP60-2	heat shock protein 60-2	STRINGENT	STRINGENT	STRINGENT	YES	YES	YES	YES	3'UTR,3'UTR	NO	3'UTR	3'UTR	Stop codon	NO
AT2G33220	A0A1P8B0W9, O49313	AT2G33220		GRIM-19 protein	STRINGENT	STRINGENT	STRINGENT	YES	YES	YES	YES	3'UTR	NO	3'UTR	3'UTR	Stop codon	NO
AT2G33340	F4IVT2, O22785	MAC3B	MAC3B	MOS4-associated complex 3B	STRINGENT	STRINGENT	STRINGENT	YES	YES	YES	YES	3'UTR,3'UTR,3'UTR	NO	3'UTR	3'UTR	3' UTR	3'UTR
AT2G33370	F4J3P1, O22686, P49690	AT2G33370		Ribosomal protein L14p/L23e family protein	STRINGENT	STRINGENT	STRINGENT	YES	YES	YES	YES	3'UTR,3'UTR	3'UTR	3'UTR	3'UTR	Stop codon	NO
AT2G33450	O22795	PRPL28	PRPL28	Ribosomal L28 family	STRINGENT	STRINGENT	STRINGENT	YES	YES	YES	YES	3'UTR	3'UTR	3'UTR	3'UTR	Stop codon	NO
AT2G33470	O22797	GLTP1	ATGLTP1, GLTP1	glycolipid transfer protein 1	STRINGENT	STRINGENT	STRINGENT	YES	YES	YES	YES	3'UTR,3'UTR	NO	3'UTR	3'UTR	NO	3'UTR
AT2G33630	O22813	AT2G33630		NAD(P)-binding Rossmann-fold superfamily protein	STRINGENT	STRINGENT	STRINGENT	YES	NO	YES	YES	3'UTR	3'UTR	3'UTR	3'UTR	NO	3'UTR
AT2G33800	A0A178VN84, P93014	EMB3113	EMB3113, PRPS5, RPS5, SCA1	Ribosomal protein S5 family protein	STRINGENT	STRINGENT	N.A.	YES	YES	NO	NO	3'UTR	CDS	3'UTR	3'UTR	CDS	NO
AT2G34040	F4IGU7, O22957	AT2G34040		Apoptosis inhibitory protein 5 (API5)	STRINGENT	STRINGENT	STRINGENT	YES	YES	YES	YES	3'UTR,3'UTR	NO	NO	3'UTR	Stop codon	3'UTR
AT2G34160	O22969	AT2G34160		Alba DNA/RNA-binding protein	STRINGENT	STRINGENT	STRINGENT	YES	NO	YES	YES	3'UTR	3'UTR	NO	3'UTR	NO	3'UTR
AT2G34250	O80774	AT2G34250		SecY protein transport family protein	STRINGENT	STRINGENT	STRINGENT	YES	YES	YES	YES	3'UTR,3'UTR,3'UTR	NO	3'UTR	3'UTR	Stop codon	NO
AT2G34310	A0A1P8AXX8, O80780	AT2G34310		hypothetical protein	STRINGENT	STRINGENT	STRINGENT	YES	NO	YES	NO	3'UTR,3'UTR,3'UTR,3'UTR,3'UTR,3'UTR	NO	3'UTR	3'UTR	Stop codon	3'UTR
AT2G34460	Q8H124	AT2G34460		NAD(P)-binding Rossmann-fold superfamily protein	STRINGENT	STRINGENT	STRINGENT	YES	YES	YES	YES	CDS,3'UTR	NO	CDS, 3'UTR	3'UTR, CDS	Stop codon	NO
AT2G34470	F4IHW4, O64700	UREG	PSKF109, UREG	urease accessory protein G	STRINGENT	STRINGENT	STRINGENT	YES	YES	YES	YES	3'UTR,3'UTR	NO	NO	3'UTR	NO	3'UTR
AT2G34480	A0A1P8AY36, P51418	AT2G34480	L18aB	Ribosomal protein L18ae/LX family protein	STRINGENT	STRINGENT	STRINGENT	YES	YES	YES	YES	3'UTR,3'UTR	NO	3'UTR	3'UTR, 5'UTR	Stop codon	NO
AT2G34520	O64695, Q9SMX4	RPS14	RPS14	mitochondrial ribosomal protein S14	STRINGENT	N.A.	STRINGENT	NO	NO	YES	NO	3'UTR	NO	NO	3'UTR	3' UTR	NO
AT2G34560	B9DGC0, O64691	CCP1	AtCCP1, CCP1	P-loop containing nucleoside triphosphate hydrolases superfamily protein	STRINGENT	STRINGENT	STRINGENT	YES	YES	YES	YES	3'UTR,3'UTR	NO	3'UTR	3'UTR	NO	3'UTR
AT2G34690	O64587	ACD11	ACD11	Glycolipid transfer protein (GLTP) family protein	STRINGENT	STRINGENT	STRINGENT	YES	YES	YES	YES	3'UTR	NO	3'UTR	3'UTR	Stop codon	3'UTR
AT2G34720	A0A1P8AYC2, Q8VY64	NF-YA4	NF-YA4	nuclear factor Y, subunit A4	STRINGENT	STRINGENT	STRINGENT	YES	YES	YES	YES	3'UTR,3'UTR,3'UTR	NO	3'UTR	3'UTR	NO	3'UTR
AT2G34860	A0A178W075, O64750	EDA3	EDA3, PSA2	DnaJ/Hsp40 cysteine-rich domain superfamily protein	STRINGENT	STRINGENT	STRINGENT	YES	YES	YES	YES	3'UTR,3'UTR	NO	3'UTR	3'UTR, CDS, 5'UTR	3' UTR	3'UTR
AT2G35050	O64768	AT2G35050		kinase superfamily with octicosapeptide/Phox/Bem1p domain-containing protein	STRINGENT	STRINGENT	STRINGENT	YES	NO	YES	NO	3'UTR,3'UTR	3'UTR	3'UTR	3'UTR	Stop codon	3'UTR
AT2G35370	P25855	GDCH	GDCH	glycine decarboxylase complex H	STRINGENT	STRINGENT	N.A.	YES	YES	NO	NO	3'UTR	NO	3'UTR	3'UTR, 5'UTR, CDS	Stop codon	NO
AT2G35410	O82299	AT2G35410		RNA-binding (RRM/RBD/RNP motifs) family protein	STRINGENT	STRINGENT	N.A.	YES	NO	NO	NO	3'UTR	NO	3'UTR	3'UTR	Stop codon	NO
AT2G35490	O82291	AT2G35490		Plastid-lipid associated protein PAP / fibrillin family protein	STRINGENT	STRINGENT	STRINGENT	YES	YES	YES	NO	3'UTR	NO	3'UTR	3'UTR	Stop codon	3'UTR
AT2G35635	Q8RUC6	UBQ7	RUB2, UBQ7	ubiquitin 7	STRINGENT	STRINGENT	STRINGENT	YES	YES	YES	YES	3'UTR	NO	3'UTR	3'UTR	Stop codon	NO
AT2G35790	Q9ZQQ1	AT2G35790		transmembrane protein	STRINGENT	STRINGENT	STRINGENT	YES	NO	YES	YES	3'UTR	NO	3'UTR	3'UTR	NO	3'UTR
AT2G35795	Q8RV04	AT2G35795		Chaperone DnaJ-domain superfamily protein	STRINGENT	STRINGENT	STRINGENT	YES	NO	YES	YES	3'UTR	NO	3'UTR	3'UTR	NO	3'UTR
AT2G35810	Q8VZP3, Q9SJ69	AT2G35810		ureidoglycolate hydrolase	STRINGENT	STRINGENT	STRINGENT	YES	NO	YES	YES	3'UTR,3'UTR	NO	3'UTR	3'UTR	NO	NO
AT2G35840	Q9SJ66	AT2G35840		Sucrose-6F-phosphate phosphohydrolase family protein	STRINGENT	STRINGENT	STRINGENT	YES	NO	YES	YES	3'UTR,3'UTR,3'UTR	NO	3'UTR	3'UTR	coding_intron	3'UTR
AT2G36060	A0A178VRN9, Q9SJ44, Q9SJ44-2, Q9SJ44-3	MMZ3	MMZ3, UEV1C	MMS ZWEI homologue 3	STRINGENT	STRINGENT	STRINGENT	YES	NO	YES	NO	3'UTR,3'UTR,3'UTR	NO	3'UTR	3'UTR, 5'UTR	Stop codon	3'UTR
AT2G36130	A0A178VS99, Q9SIH1	AT2G36130	Cyclophilin	Cyclophilin-like peptidyl-prolyl cis-trans isomerase family protein	STRINGENT	STRINGENT	STRINGENT	YES	YES	YES	YES	3'UTR	NO	3'UTR	3'UTR	NO	3'UTR
AT2G36160	Q9SIH0	AT2G36160		Ribosomal protein S11 family protein	STRINGENT	STRINGENT	STRINGENT	YES	YES	YES	YES	3'UTR	5'UTR, CDS, StartCodon	3'UTR	3'UTR	Stop codon	3'UTR
AT2G36170	A0A178VD86, B9DHA6	AT2G36170	RPL40A, UBQ2	60S ribosomal protein L40-1	STRINGENT	STRINGENT	STRINGENT	YES	YES	YES	YES	3'UTR	NO	3'UTR	3'UTR	Stop codon	3'UTR
AT2G36250	A0A1P8AXD8, O82533	FTSZ2-1	ATFTSZ2-1, FTSZ2-1	Tubulin/FtsZ family protein	STRINGENT	STRINGENT	STRINGENT	YES	YES	YES	NO	3'UTR,3'UTR,3'UTR,3'UTR	3'UTR	3'UTR	3'UTR	3' UTR	3'UTR
AT2G36530	A0A1P8B1N1, P25696, Q944M3	LOS2	ENO2, LOS2	Enolase	STRINGENT	STRINGENT	STRINGENT	YES	YES	YES	YES	3'UTR,3'UTR	NO	3'UTR	3'UTR	3' UTR	NO
AT2G36580	Q9SJQ0	AT2G36580		Pyruvate kinase family protein	STRINGENT	STRINGENT	STRINGENT	YES	YES	YES	YES	3'UTR	NO	3'UTR	3'UTR	Stop codon	3'UTR
AT2G36620	C0Z2G1, Q42347	RPL24A	RPL24A	ribosomal protein L24	STRINGENT	STRINGENT	STRINGENT	YES	YES	YES	YES	3'UTR	NO	3'UTR	3'UTR	NO	3'UTR
AT2G36835	Q8W455	AT2G36835		hypothetical protein	STRINGENT	STRINGENT	N.A.	YES	NO	NO	NO	3'UTR	3'UTR	3'UTR	3'UTR	Stop codon	3'UTR
AT2G36850	Q9SJM0	GSL8	ATGSL08, ATGSL8, CHOR, ET2, GSL08, GSL8, MAS	glucan synthase-like 8	STRINGENT	STRINGENT	STRINGENT	YES	YES	YES	YES	3'UTR	3'UTR	3'UTR	3'UTR	Stop codon	NO
AT2G36930	Q9SJL4	AT2G36930		zinc finger (C2H2 type) family protein	STRINGENT	N.A.	STRINGENT	NO	NO	YES	YES	3'UTR	3'UTR	3'UTR	3'UTR	Stop codon	3'UTR
AT2G37120	Q42337	AT2G37120		S1FA-like DNA-binding protein	STRINGENT	STRINGENT	STRINGENT	YES	YES	YES	YES	3'UTR	NO	3'UTR	3'UTR	Stop codon	3'UTR
AT2G37190	P50883	AT2G37190	uL11A	Ribosomal protein L11 family protein	STRINGENT	STRINGENT	STRINGENT	NO	YES	YES	YES	3'UTR	3'UTR	3'UTR	3'UTR	NO	NO
AT2G37200	A0A1P8B2T8, Q6NPF8	AT2G37200	CASPL5A1	Uncharacterized protein family (UPF0497)	STRINGENT	STRINGENT	STRINGENT	YES	YES	YES	YES	3'UTR,3'UTR	NO	3'UTR	3'UTR	NO	3'UTR
AT2G37220	Q9ZUU4	AT2G37220		RNA-binding (RRM/RBD/RNP motifs) family protein	STRINGENT	STRINGENT	STRINGENT	YES	YES	YES	YES	3'UTR	CDS	3'UTR	3'UTR, 5'UTR, CDS	3' UTR, CDS	NO
AT2G37270	Q9ZUT9	RPS5B	ATRPS5B, RPS5B	ribosomal protein 5B	STRINGENT	STRINGENT	STRINGENT	YES	YES	YES	YES	3'UTR,3'UTR	NO	3'UTR	3'UTR	Stop codon	3'UTR
AT2G37340	Q8VYA5, Q8VYA5-2, Q8VYA5-3	RS2Z33	AT-RS2Z33, ATRSZ33, RS2Z33, RSZ33	arginine/serine-rich zinc knuckle-containing protein 33	STRINGENT	STRINGENT	STRINGENT	YES	YES	YES	YES	3'UTR,3'UTR,3'UTR	NO	3'UTR	3'UTR, CDS	Stop codon	3'UTR, CDS
AT2G37550	O80925	AGD7	AGD7, ASP1	ARF-GAP domain 7	STRINGENT	N.A.	STRINGENT	NO	NO	YES	NO	3'UTR,3'UTR	3'UTR	3'UTR	3'UTR	NO	3'UTR
AT2G37660	C0Z300, O80934	AT2G37660		NAD(P)-binding Rossmann-fold superfamily protein	STRINGENT	STRINGENT	N.A.	YES	YES	NO	NO	3'UTR	3'UTR	3'UTR	3'UTR, 5'UTR	Stop codon	NO
AT2G37940	Q9SH93	AtIPCS2	AtIPCS2, ERH1	Inositol phosphorylceramide synthase 2	STRINGENT	STRINGENT	STRINGENT	YES	NO	YES	YES	3'UTR,3'UTR,3'UTR	3'UTR	3'UTR	3'UTR	Stop codon	NO
AT2G38040	Q56Z17, Q9LD43	CAC3	CAC3	acetyl Co-enzyme a carboxylase carboxyltransferase alpha subunit	STRINGENT	STRINGENT	STRINGENT	YES	YES	YES	YES	5'UTR,5'UTR,3'UTR,3'UTR	NO	3'UTR	3'UTR	CDS, 3' UTR	3'UTR
AT2G38140	O80439	PSRP4	PSRP4	plastid-specific ribosomal protein 4	STRINGENT	STRINGENT	STRINGENT	YES	YES	YES	YES	3'UTR	NO	3'UTR	3'UTR, CDS	NO	NO
AT2G38270	Q8H7F6	CXIP2	ATGRX2, AtGRXS16, CXIP2	CAX-interacting protein 2	STRINGENT	STRINGENT	N.A.	YES	NO	NO	NO	3'UTR	NO	CDS	CDS, 3'UTR	Stop codon	NO
AT2G38550	Q9ZVH7	AT2G38550		Transmembrane proteins 14C	STRINGENT	N.A.	STRINGENT	NO	NO	YES	YES	3'UTR	NO	3'UTR	3'UTR	Stop codon	NO
AT2G38700	O23722	MVD1	AtMDD1, ATMVD1, MDD1, MVD1	mevalonate diphosphate decarboxylase 1	STRINGENT	STRINGENT	STRINGENT	YES	YES	YES	YES	3'UTR	NO	NO	3'UTR	Stop codon	3'UTR
AT2G38800	Q9SII1	AT2G38800		Plant calmodulin-binding protein-like protein	STRINGENT	N.A.	STRINGENT	NO	NO	YES	YES	3'UTR	CDS	3'UTR	3'UTR	3' UTR	3'UTR
AT2G39390	O80626	AT2G39390		Ribosomal L29 family protein	STRINGENT	STRINGENT	STRINGENT	YES	YES	YES	YES	3'UTR	NO	3'UTR	3'UTR	NO	3'UTR
AT2G39460	Q8LD46	RPL23AA	ATRPL23A, RPL23A, RPL23A1, RPL23AA	ribosomal protein L23AA	STRINGENT	STRINGENT	STRINGENT	YES	YES	YES	YES	3'UTR,3'UTR	NO	3'UTR	3'UTR	NO	NO
AT2G39470	O80634, O80634-2, O80634-3	PnsL1	PnsL1, PPL2	PsbP-like protein 2	STRINGENT	STRINGENT	N.A.	YES	NO	NO	NO	3'UTR,3'UTR,3'UTR	NO	3'UTR	3'UTR	NO	NO
AT2G39730	A0A178VW63, F4IVZ7, P10896, P10896-2	RCA	RCA	rubisco activase	STRINGENT	STRINGENT	N.A.	YES	NO	NO	NO	CDS,3'UTR,3'UTR,3'UTR,3'UTR,3'UTR	NO	3'UTR	3'UTR, 5'UTR, CDS	NO	NO
AT2G39760	A0A1P8AZW8, O22286, O22286-2	BPM3	ATBPM3, BPM3	BTB/POZ/MATH-domains containing protein	STRINGENT	STRINGENT	STRINGENT	YES	YES	YES	YES	3'UTR,3'UTR	3'UTR	NO	3'UTR	Stop codon	3'UTR
AT2G39770	O22287	CYT1	CYT1, EMB101, GMP1, SOZ1, VTC1	Glucose-1-phosphate adenylyltransferase family protein	STRINGENT	N.A.	STRINGENT	NO	NO	YES	NO	3'UTR,3'UTR	NO	3'UTR	3'UTR	NO	NO
AT2G39780	F4IW05, P42814, Q9C5B7	RNS2	RNS2	ribonuclease 2	STRINGENT	STRINGENT	STRINGENT	YES	YES	YES	YES	3'UTR,3'UTR	NO	3'UTR	3'UTR	Stop codon	3'UTR
AT2G39800	B9DFG0, F4IFZ9, P54887	P5CS1	ATP5CS, P5CS1	delta1-pyrroline-5-carboxylate synthase 1	STRINGENT	STRINGENT	STRINGENT	YES	NO	YES	YES	3'UTR,3'UTR,3'UTR,3'UTR,3'UTR,3'UTR	3'UTR	NO	3'UTR	Stop codon	NO
AT2G39990	O04202	EIF2	AteIF3f, EIF2, eIF3F	eukaryotic translation initiation factor 2	STRINGENT	STRINGENT	STRINGENT	YES	YES	YES	YES	3'UTR	CDS	3'UTR	3'UTR	Stop codon	3'UTR
AT2G40060	O04209	CLC2	CLC2	Clathrin light chain protein	STRINGENT	STRINGENT	N.A.	YES	NO	NO	NO	3'UTR	NO	3'UTR	3'UTR	Stop codon	3'UTR
AT2G40205	P62120	AT2G40205		Ribosomal protein L41 family	STRINGENT	STRINGENT	STRINGENT	YES	YES	YES	YES	3'UTR	NO	3'UTR	3'UTR	NO	NO
AT2G40290	A2RVK1, Q9SIZ2	AT2G40290		Eukaryotic translation initiation factor 2 subunit 1	STRINGENT	STRINGENT	STRINGENT	YES	NO	YES	YES	3'UTR,3'UTR,3'UTR	NO	3'UTR	3'UTR	Stop codon	3'UTR
AT2G40490	O22886	HEME2	HEME2	Uroporphyrinogen decarboxylase	STRINGENT	STRINGENT	N.A.	YES	NO	NO	NO	3'UTR	NO	3'UTR	3'UTR	NO	NO
AT2G40510	Q8LPJ7	AT2G40510		Ribosomal protein S26e family protein	STRINGENT	STRINGENT	STRINGENT	YES	YES	YES	YES	3'UTR	NO	3'UTR	3'UTR, 5'UTR	Stop codon	3'UTR
AT2G40590	P49206	AT2G40590		Ribosomal protein S26e family protein	STRINGENT	STRINGENT	STRINGENT	YES	YES	YES	YES	3'UTR	3'UTR	3'UTR	3'UTR	NO	3'UTR
AT2G40730	A0A178VLD7	CTEXP	CTEXP	kinase family with ARM repeat domain-containing protein	STRINGENT	STRINGENT	N.A.	YES	NO	NO	NO	3'UTR	3'UTR	3'UTR	3'UTR	Stop codon	3'UTR
AT2G40765	Q94K78	AT2G40765		transmembrane protein	STRINGENT	STRINGENT	STRINGENT	YES	NO	YES	NO	CDS,3'UTR	NO	3'UTR	3'UTR	3' UTR	3'UTR
AT2G40840	Q8RXD9	DPE2	DPE2	disproportionating enzyme 2	STRINGENT	STRINGENT	STRINGENT	YES	NO	YES	NO	3'UTR	3'UTR	3'UTR	3'UTR	Stop codon	3'UTR
AT2G41220	Q9T0P4	GLU2	GLU2	glutamate synthase 2	STRINGENT	STRINGENT	STRINGENT	YES	NO	YES	YES	3'UTR	3'UTR	NO	3'UTR	3' UTR	NO
AT2G41475	Q67Y15, Q681K2	AT2G41475	ATS3A	Embryo-specific protein 3, (ATS3)	STRINGENT	STRINGENT	STRINGENT	YES	NO	YES	YES	3'UTR	NO	3'UTR	3'UTR	Stop codon	3'UTR
AT2G41680	O22229	NTRC	NTRC	NADPH-dependent thioredoxin reductase C	STRINGENT	STRINGENT	STRINGENT	YES	NO	YES	NO	3'UTR	NO	3'UTR	3'UTR	Stop codon	NO
AT2G41790	O22941	AT2G41790		Insulinase (Peptidase family M16) family protein	STRINGENT	STRINGENT	STRINGENT	YES	NO	YES	NO	3'UTR	NO	3'UTR	CDS, 3'UTR	Stop codon	3'UTR
AT2G41840	P49688	AT2G41840		Ribosomal protein S5 family protein	STRINGENT	STRINGENT	STRINGENT	YES	YES	YES	YES	CDS,3'UTR	NO	3'UTR	3'UTR	Stop codon	3'UTR
AT2G42210	O48528, O48528-2	OEP16-3	ATOEP16-3, OEP16-3	Mitochondrial import inner membrane translocase subunit Tim17/Tim22/Tim23 family protein	STRINGENT	STRINGENT	STRINGENT	YES	YES	YES	YES	3'UTR,3'UTR,3'UTR,3'UTR,3'UTR	NO	3'UTR	3'UTR	Stop codon	NO
AT2G42220	O48529	AT2G42220		Rhodanese/Cell cycle control phosphatase superfamily protein	STRINGENT	STRINGENT	N.A.	YES	YES	NO	NO	3'UTR	3'UTR	3'UTR	3'UTR, 5'UTR	NO	3'UTR
AT2G42310	Q9SLC8	AT2G42310		ESSS subunit of NADH:ubiquinone oxidoreductase (complex I) protein	STRINGENT	STRINGENT	STRINGENT	YES	YES	YES	YES	3'UTR	3'UTR	3'UTR	3'UTR	3' UTR	NO
AT2G42590	F4IP53, F4IP55, Q96299	GRF9	GF14 MU, GRF14, GRF9	general regulatory factor 9	STRINGENT	STRINGENT	STRINGENT	YES	YES	YES	YES	3'UTR,3'UTR,3'UTR	NO	3'UTR	3'UTR	3' UTR	NO
AT2G42600	Q5GM68	PPC2	ATPPC2, PPC2	phosphoenolpyruvate carboxylase 2	STRINGENT	STRINGENT	STRINGENT	YES	NO	YES	NO	3'UTR,3'UTR,3'UTR	NO	3'UTR	3'UTR	Stop codon	NO
AT2G42680	Q9SJI8	MBF1A	ATMBF1A, MBF1A	multiprotein bridging factor 1A	STRINGENT	STRINGENT	STRINGENT	YES	NO	YES	NO	3'UTR	NO	3'UTR	3'UTR	Stop codon	NO
AT2G42810	A0A178VPU7, A0A1P8AY87, Q84XU2, Q84XU2-2	PP5.2	AtPP5, PAPP5, PP5	protein phosphatase 5.2	STRINGENT	STRINGENT	STRINGENT	YES	NO	YES	YES	3'UTR,3'UTR,3'UTR,3'UTR,3'UTR	3'UTR	3'UTR	3'UTR	3' UTR	3'UTR
AT2G42880	A0A178VTU3, A0A1P8B0K7, Q9SJG9	MPK20	ATMPK20, MPK20	MAP kinase 20	STRINGENT	STRINGENT	STRINGENT	YES	NO	YES	NO	3'UTR,3'UTR	NO	3'UTR	3'UTR	NO	NO
AT2G43030	Q9SKX4	AT2G43030	PRPL3	Ribosomal protein L3 family protein	STRINGENT	STRINGENT	N.A.	YES	YES	NO	NO	3'UTR	NO	3'UTR	3'UTR, 5'UTR, CDS	NO	NO
AT2G43090	F4IQ61, Q9ZW85	AT2G43090	IPMI SSU1	Aconitase/3-isopropylmalate dehydratase protein	STRINGENT	STRINGENT	STRINGENT	YES	YES	YES	YES	3'UTR,3'UTR	3'UTR	3'UTR	3'UTR	NO	3'UTR
AT2G43160	A0A178VZ34, Q67YI9, Q67YI9-2	AT2G43160		ENTH/VHS family protein	STRINGENT	STRINGENT	STRINGENT	YES	NO	YES	YES	3'UTR,3'UTR,3'UTR,3'UTR	NO	3'UTR	3'UTR	Stop codon	3'UTR
AT2G43350	A0A178W097, O22850	GPX3	ATGPX3, GPX3, GPXL3	glutathione peroxidase 3	STRINGENT	STRINGENT	STRINGENT	YES	NO	YES	YES	3'UTR,3'UTR	NO	3'UTR	3'UTR	NO	3'UTR
AT2G43460	O22860	AT2G43460		Ribosomal L38e protein family	STRINGENT	STRINGENT	STRINGENT	YES	YES	YES	YES	3'UTR	NO	3'UTR	3'UTR	Stop codon	NO
AT2G43560	A0A1P8B252, O22870	AT2G43560		FKBP-like peptidyl-prolyl cis-trans isomerase family protein	STRINGENT	STRINGENT	N.A.	YES	YES	NO	NO	3'UTR,3'UTR	NO	3'UTR	3'UTR	Stop codon	NO
AT2G43710	F4IS32, O22832	SSI2	AtSSI2, FAB2, LDW1, SSI2	Plant stearoyl-acyl-carrier-protein desaturase family protein	STRINGENT	STRINGENT	STRINGENT	YES	YES	YES	YES	3'UTR,3'UTR	3'UTR	3'UTR	3'UTR	3' UTR	NO
AT2G43750	P47999	OASB	ACS1, ATCS-B, CPACS1, OASB	O-acetylserine (thiol) lyase B	STRINGENT	STRINGENT	STRINGENT	YES	YES	YES	YES	3'UTR,3'UTR	NO	3'UTR	3'UTR	Stop codon	3'UTR
AT2G43780	A0A1P8AZ61, O22825	AT2G43780		cytochrome oxidase assembly protein	STRINGENT	STRINGENT	STRINGENT	YES	NO	YES	YES	3'UTR,3'UTR,3'UTR,3'UTR	NO	NO	NO	NO	3'UTR
AT2G43910	A0A2H1ZE37, F4IT14, Q0WP12, Q0WP12-2, Q0WP12-3	HOL1	ATHOL1, HOL1	HARMLESS TO OZONE LAYER 1	STRINGENT	STRINGENT	STRINGENT	YES	YES	YES	NO	3'UTR,3'UTR,3'UTR	3'UTR	3'UTR	3'UTR, CDS	NO	3'UTR
AT2G43945	F4IT21, Q84W46	AT2G43945		hypothetical protein	STRINGENT	STRINGENT	N.A.	YES	NO	NO	NO	3'UTR	NO	3'UTR	3'UTR	NO	3'UTR
AT2G43970	O80567, O80567-2, O80567-3	LARP6b	AtLARP6b, LARP6b	RNA-binding protein	STRINGENT	STRINGENT	STRINGENT	YES	YES	YES	YES	3'UTR,3'UTR	3'UTR	3'UTR, CDS	3'UTR	Stop codon, CDS	NO
AT2G44050	O80575	COS1	COS1	6,7-dimethyl-8-ribityllumazine synthase / DMRL synthase / lumazine synthase / riboflavin synthase	STRINGENT	STRINGENT	STRINGENT	YES	YES	YES	YES	3'UTR	NO	3'UTR	3'UTR	Stop codon	3'UTR
AT2G44060	O80576, Q8LCW6	AT2G44060	LEA26	Late embryogenesis abundant protein, group 2	STRINGENT	N.A.	STRINGENT	NO	NO	NO	YES	3'UTR,3'UTR	NO	3'UTR	3'UTR	Stop codon	NO
AT2G44100	Q96254, Q96254-2	GDI1	AT-GDI1, ATGDI1, GDI1	guanosine nucleotide diphosphate dissociation inhibitor 1	STRINGENT	STRINGENT	STRINGENT	YES	YES	YES	YES	3'UTR,3'UTR	NO	3'UTR	3'UTR, 5'UTR	Stop codon	NO
AT2G44120	F4IT48, P60039, Q0WM13	AT2G44120		Ribosomal protein L30/L7 family protein	STRINGENT	STRINGENT	STRINGENT	YES	YES	YES	YES	3'UTR,3'UTR	5'UTR	3'UTR	3'UTR	Stop codon	NO
AT2G44160	O80585	MTHFR2	MTHFR2	methylenetetrahydrofolate reductase 2	STRINGENT	STRINGENT	STRINGENT	YES	NO	YES	NO	3'UTR	3'UTR	3'UTR	3'UTR	Stop codon	3'UTR
AT2G44350	A0A178VUU3, P20115, P20115-2	ATCS	ATCS, CSY4	Citrate synthase family protein	STRINGENT	STRINGENT	STRINGENT	YES	YES	YES	YES	3'UTR,3'UTR	NO	3'UTR	3'UTR	3' UTR	3'UTR
AT2G44610	O80501	RAB6A	ATRAB6A, ATRABH1B, RAB6, RAB6A	Ras-related small GTP-binding family protein	STRINGENT	STRINGENT	STRINGENT	YES	YES	YES	YES	3'UTR	NO	3'UTR	3'UTR	3' UTR	3'UTR
AT2G44620	P53665	MTACP-1	MTACP-1, MTACP1	mitochondrial acyl carrier protein 1	STRINGENT	STRINGENT	STRINGENT	YES	YES	YES	YES	3'UTR	NO	3'UTR	3'UTR	Stop codon	3'UTR
AT2G44650	O80504	CHL-CPN10	CHL-CPN10, CPN10	chloroplast chaperonin 10	STRINGENT	STRINGENT	STRINGENT	YES	YES	YES	YES	3'UTR	NO	3'UTR	3'UTR	NO	3'UTR, 5'UTR
AT2G44870	O22164	AT2G44870		replicase polyprotein 1ab protein	STRINGENT	STRINGENT	N.A.	YES	YES	NO	NO	3'UTR	CDS	3'UTR	3'UTR	3' UTR	3'UTR
AT2G44920	O22160, O22160-2	AT2G44920		Tetratricopeptide repeat (TPR)-like superfamily protein	STRINGENT	STRINGENT	N.A.	YES	YES	NO	NO	3'UTR,3'UTR	StopCodon, 3'UTR, CDS	CDS, 3'UTR	3'UTR	3' UTR	3'UTR
AT2G45070	P38389	SEC61 BETA	SEC61 BETA	Preprotein translocase Sec, Sec61-beta subunit protein	STRINGENT	N.A.	STRINGENT	NO	NO	YES	NO	CDS,CDS,CDS,CDS,3'UTR,3'UTR,3'UTR,3'UTR	3'UTR, 5'UTR	3'UTR	3'UTR, CDS	Stop codon	NO
AT2G45140	A0A1P8B1Q1, Q9SHC8	PVA12	PVA12	plant VAP homolog 12	STRINGENT	STRINGENT	N.A.	YES	NO	NO	NO	3'UTR,3'UTR	NO	3'UTR	3'UTR	Stop codon	3'UTR
AT2G45520	O64632	AT2G45520		coiled-coil protein	STRINGENT	STRINGENT	STRINGENT	YES	NO	YES	NO	3'UTR	NO	3'UTR	3'UTR	Stop codon	3'UTR
AT2G45670	Q8S8S2, Q8S8S2-2	AT2G45670	AtLPEAT2, LPEAT2	calcineurin B subunit-like protein	STRINGENT	STRINGENT	STRINGENT	YES	YES	YES	YES	3'UTR,3'UTR	NO	3'UTR	3'UTR	3' UTR, Stop codon	3'UTR
AT2G45790	O80840	PMM	ATPMM, PMM	phosphomannomutase	STRINGENT	STRINGENT	STRINGENT	YES	YES	YES	YES	3'UTR	NO	3'UTR	3'UTR	NO	3'UTR
AT2G45810	Q94BV4	AT2G45810	RH6	DEA(D/H)-box RNA helicase family protein	STRINGENT	STRINGENT	STRINGENT	YES	NO	YES	NO	3'UTR	NO	3'UTR	3'UTR	NO	3'UTR
AT2G45820	O80837	AT2G45820	Rem1.3	Remorin family protein	STRINGENT	STRINGENT	STRINGENT	YES	YES	YES	YES	3'UTR	NO	3'UTR	3'UTR, CDS, 5'UTR	Stop codon, CDS	NO
AT2G45960	A8MRW1, B9DFR9, Q06611	PIP1B	ATHH2, PIP1;2, PIP1B, TMP-A	plasma membrane intrinsic protein 1B	STRINGENT	STRINGENT	STRINGENT	YES	YES	YES	YES	3'UTR,3'UTR,3'UTR	NO	3'UTR	3'UTR, 5'UTR, CDS	Stop codon	NO
AT2G45990	F4IH73, F4IH74, O82790	AT2G45990		ribosomal RNA small subunit methyltransferase G	STRINGENT	STRINGENT	STRINGENT	YES	YES	YES	YES	3'UTR,3'UTR,3'UTR,3'UTR	NO	3'UTR	3'UTR	Stop codon	3'UTR
AT2G46170	B3H7B0, O82352	AT2G46170	RTNLB5	Reticulon family protein	STRINGENT	N.A.	STRINGENT	NO	NO	YES	YES	3'UTR	NO	3'UTR	3'UTR	Stop codon	3'UTR
AT2G46280	F4II65, Q38884	TRIP-1	TIF3I1, TRIP-1, TRIP1	TGF-beta receptor interacting protein 1	STRINGENT	STRINGENT	STRINGENT	YES	YES	YES	YES	3'UTR,3'UTR,3'UTR	NO	3'UTR	3'UTR	Stop codon	3'UTR
AT2G46540	Q9ZPY5	AT2G46540		fiber	STRINGENT	STRINGENT	STRINGENT	YES	NO	YES	YES	3'UTR	NO	3'UTR	3'UTR	Stop codon	3'UTR
AT2G46820	Q8LCA1	PSI-P	CURT1B, PSAP, PSI-P, PTAC8, TMP14	photosystem I P subunit	STRINGENT	STRINGENT	N.A.	YES	YES	NO	NO	3'UTR,3'UTR	NO	3'UTR	3'UTR, 5'UTR, CDS	Stop codon	NO
AT2G47110	P59232	UBQ6	UBI6, UBQ6	ubiquitin 6	STRINGENT	STRINGENT	STRINGENT	YES	YES	YES	YES	3'UTR,3'UTR,3'UTR	NO	3'UTR	3'UTR	NO	NO
AT2G47170	P36397	ARF1A1C	ARF1A1C, BEX1	Ras-related small GTP-binding family protein	STRINGENT	STRINGENT	STRINGENT	YES	YES	YES	YES	3'UTR	NO	3'UTR	3'UTR, 5'UTR	Stop codon	NO
AT2G47210	Q8VZL6	AT2G47210	ATSWC4, SWC4	myb-like transcription factor family protein	STRINGENT	STRINGENT	STRINGENT	YES	YES	YES	YES	3'UTR,3'UTR,3'UTR	NO	NO	3'UTR	Stop codon	3'UTR
AT2G47320	Q94A16, Q94A16-2	AT2G47320		Cyclophilin-like peptidyl-prolyl cis-trans isomerase family protein	STRINGENT	STRINGENT	STRINGENT	YES	NO	YES	YES	3'UTR	NO	3'UTR	3'UTR	NO	3'UTR
AT2G47380	O22912	AT2G47380		Cytochrome c oxidase subunit Vc family protein	STRINGENT	STRINGENT	STRINGENT	YES	YES	YES	YES	3'UTR,3'UTR,5'UTR	NO	3'UTR	3'UTR, 5'UTR	Stop codon	3'UTR
AT2G47400	O22914	CP12-1	CP12, CP12-1	CP12 domain-containing protein 1	STRINGENT	N.A.	STRINGENT	NO	NO	YES	NO	3'UTR	NO	NO	5'UTR, 3'UTR, CDS	NO	NO
AT2G47470	A8MSC5, F4IL52, F4IL53, O22263	UNE5	ATPDI11, ATPDIL2-1, MEE30, PDI11, UNE5	thioredoxin family protein	STRINGENT	STRINGENT	STRINGENT	YES	YES	YES	YES	3'UTR,3'UTR,3'UTR,3'UTR	NO	3'UTR	3'UTR	Stop codon	3'UTR
AT2G47510	P93033	FUM1	FUM1	fumarase 1	STRINGENT	STRINGENT	STRINGENT	YES	YES	YES	YES	3'UTR,3'UTR,3'UTR	NO	3'UTR	3'UTR	Stop codon	3'UTR
AT2G47590	Q8LB72	PHR2	PHR2	photolyase/blue-light receptor 2	STRINGENT	STRINGENT	STRINGENT	YES	YES	YES	NO	3'UTR	NO	3'UTR	3'UTR	3' UTR	3'UTR
AT2G47610	P49692, Q570Q7	AT2G47610		Ribosomal protein L7Ae/L30e/S12e/Gadd45 family protein	STRINGENT	STRINGENT	STRINGENT	YES	YES	YES	YES	3'UTR	NO	3'UTR	3'UTR, CDS	Stop codon	3'UTR
AT2G47690	A0A1P8AX87, B3H4P7, O82238	AT2G47690		NADH-ubiquinone oxidoreductase-like protein	STRINGENT	STRINGENT	STRINGENT	YES	YES	YES	YES	3'UTR,3'UTR,3'UTR	NO	3'UTR	3'UTR	NO	3'UTR
AT2G47710	O82240	AT2G47710		Adenine nucleotide alpha hydrolases-like superfamily protein	STRINGENT	STRINGENT	STRINGENT	YES	YES	YES	YES	3'UTR	3'UTR, 5'UTR	3'UTR	3'UTR	Stop codon	3'UTR
AT2G47940	B3H581, O82261	DEG2	DEG2, DEGP2, EMB3117	DEGP protease 2	STRINGENT	STRINGENT	STRINGENT	YES	YES	YES	YES	3'UTR,3'UTR	3'UTR	3'UTR	3'UTR	3' UTR	NO
AT3G01120	P55217	MTO1	AtCGS1, AtCYS1, CGS, CGS1, MTO1	Pyridoxal phosphate (PLP)-dependent transferases superfamily protein	STRINGENT	STRINGENT	STRINGENT	YES	YES	YES	YES	3'UTR	NO	3'UTR	3'UTR	CDS	3'UTR
AT3G01130	A0A1I9LP52, A0A1I9LP53, A0A1I9LP56, F4J2A7, Q9MAC4	AT3G01130		ATP synthase E chain	STRINGENT	STRINGENT	STRINGENT	YES	YES	YES	YES	CDS,CDS,3'UTR,3'UTR,3'UTR,3'UTR,3'UTR,3'UTR,3'UTR,3'UTR,3'UTR,3'UTR,3'UTR,3'UTR,3'UTR,3'UTR	NO	3'UTR	3'UTR	Stop codon	3'UTR
AT3G01280	Q9SRH5	VDAC1	ATVDAC1, VDAC1	voltage dependent anion channel 1	STRINGENT	STRINGENT	STRINGENT	YES	YES	YES	YES	3'UTR	NO	3'UTR	3'UTR	Stop codon	NO
AT3G01390	O82628	VMA10	AVMA10, VMA10	vacuolar membrane ATPase 10	STRINGENT	STRINGENT	STRINGENT	YES	YES	YES	YES	3'UTR,3'UTR,3'UTR,3'UTR	NO	3'UTR	3'UTR	Stop codon	NO
AT3G01480	Q9SSA5, Q9SSA5-2	38	ATCYP38, CYP38	cyclophilin 38	STRINGENT	STRINGENT	N.A.	YES	YES	NO	NO	3'UTR,3'UTR	NO	3'UTR	3'UTR	NO	NO
AT3G01520	A0A178V9R7, Q8LGG8	AT3G01520		Adenine nucleotide alpha hydrolases-like superfamily protein	STRINGENT	N.A.	STRINGENT	NO	NO	YES	NO	3'UTR	NO	3'UTR	3'UTR	Stop codon	3'UTR
AT3G01540	A0A178V5S3, A0A178V775, Q8H136, Q8H136-2	DRH1	ATDRH1, DRH1, RH14	DEAD box RNA helicase 1	STRINGENT	STRINGENT	STRINGENT	YES	YES	YES	YES	3'UTR,3'UTR,3'UTR,3'UTR,3'UTR,3'UTR,3'UTR	NO	3'UTR	3'UTR	Stop codon	NO
AT3G01690	A0A178VAV8, Q9S7U7	AT3G01690		alpha/beta-Hydrolases superfamily protein	STRINGENT	STRINGENT	STRINGENT	YES	YES	YES	YES	3'UTR	3'UTR	3'UTR	3'UTR	CDS, Stop codon	NO
AT3G01790	A0A1I9LNS9, Q7XA68	AT3G01790		Ribosomal protein L13 family protein	STRINGENT	STRINGENT	STRINGENT	YES	YES	YES	YES	3'UTR,3'UTR,3'UTR	NO	3'UTR	3'UTR	Stop codon	3'UTR
AT3G01850	A0A178VIY9, A0A1I9LND0, Q94K13	AT3G01850		Aldolase-type TIM barrel family protein	STRINGENT	STRINGENT	STRINGENT	YES	NO	YES	YES	3'UTR,3'UTR,3'UTR,3'UTR	3'UTR	3'UTR	3'UTR	3' UTR	3'UTR
AT3G01910	A8MRF8, F4JBZ5, Q9S850	SOX	AT-SO, AtSO, SOX	sulfite oxidase	STRINGENT	STRINGENT	STRINGENT	YES	YES	YES	YES	3'UTR,3'UTR,3'UTR	NO	3'UTR	3'UTR	Stop codon	3'UTR
AT3G02080	Q9SGA6	AT3G02080		Ribosomal protein S19e family protein	STRINGENT	STRINGENT	STRINGENT	YES	YES	YES	YES	3'UTR	NO	3'UTR	3'UTR	Stop codon	NO
AT3G02090	C0Z325, Q42290, Q42290-2, Q56Z94	MPPBETA	MPPBETA	Insulinase (Peptidase family M16) protein	STRINGENT	STRINGENT	STRINGENT	YES	YES	YES	YES	3'UTR,3'UTR	NO	3'UTR	3'UTR	3' UTR	NO
AT3G02200	F4J2B4, Q8W4A0	AT3G02200		Proteasome component (PCI) domain protein	STRINGENT	STRINGENT	STRINGENT	YES	NO	YES	YES	3'UTR,3'UTR	3'UTR	3'UTR	3'UTR	Stop codon	3'UTR
AT3G02350	Q9FWA4	GAUT9	GAUT9	galacturonosyltransferase 9	STRINGENT	STRINGENT	STRINGENT	YES	NO	YES	YES	3'UTR	3'UTR	3'UTR	3'UTR	NO	NO
AT3G02360	Q9FWA3	AT3G02360	PGD2	6-phosphogluconate dehydrogenase family protein	STRINGENT	STRINGENT	STRINGENT	YES	YES	YES	YES	3'UTR,3'UTR	NO	3'UTR	3'UTR	NO	NO
AT3G02470	Q96286	SAMDC	SAMDC	S-adenosylmethionine decarboxylase	STRINGENT	STRINGENT	STRINGENT	YES	NO	YES	NO	3'UTR,3'UTR,3'UTR,3'UTR,3'UTR	5'UTR	3'UTR	3'UTR, 5'UTR, CDS	NO	NO
AT3G02520	Q96300	GRF7	GF14 NU, GRF7	general regulatory factor 7	STRINGENT	N.A.	STRINGENT	NO	NO	YES	YES	3'UTR,3'UTR	3'UTR	3'UTR	3'UTR, 5'UTR	Stop codon	3'UTR
AT3G02560	Q9M885	AT3G02560		Ribosomal protein S7e family protein	STRINGENT	STRINGENT	STRINGENT	YES	YES	YES	YES	3'UTR,3'UTR,3'UTR	NO	3'UTR	3'UTR, CDS	Stop codon	NO
AT3G02720	Q9M8R4	DJ1D	DJ-1d, DJ1D	Class I glutamine amidotransferase-like superfamily protein	STRINGENT	STRINGENT	STRINGENT	YES	YES	YES	YES	3'UTR	NO	3'UTR	3'UTR	Stop codon	3'UTR
AT3G02730	Q9XFH8	TRXF1	ATF1, TRXF1	thioredoxin F-type 1	STRINGENT	STRINGENT	N.A.	YES	YES	NO	NO	3'UTR	NO	3'UTR	3'UTR	Stop codon	NO
AT3G02780	A0A1I9LM15, Q42553	IPP2	IDI2, IPIAT1, IPP2	isopentenyl pyrophosphate:dimethylallyl pyrophosphate isomerase 2	STRINGENT	STRINGENT	STRINGENT	YES	YES	YES	YES	3'UTR,3'UTR	NO	3'UTR, CDS	3'UTR, CDS	Stop codon	3'UTR
AT3G02870	B3H749, F4IYH1, Q9M8S8	VTC4	VTC4	Inositol monophosphatase family protein	STRINGENT	STRINGENT	N.A.	YES	NO	NO	NO	3'UTR,3'UTR,3'UTR	NO	3'UTR	3'UTR	NO	3'UTR
AT3G02900	F4IYH7, Q9M8T2	AT3G02900		Low-density receptor-like protein	STRINGENT	STRINGENT	STRINGENT	YES	YES	YES	YES	3'UTR,3'UTR	3'UTR	3'UTR	3'UTR	Stop codon	3'UTR
AT3G03070	Q9M9M6	AT3G03070		NADH-ubiquinone oxidoreductase-like protein	STRINGENT	STRINGENT	STRINGENT	YES	NO	YES	YES	3'UTR	NO	3'UTR	3'UTR	Stop codon	3'UTR
AT3G03100	F4IZR4, Q9M9M9	AT3G03100		NADH:ubiquinone oxidoreductase, 17.2kDa subunit	STRINGENT	STRINGENT	STRINGENT	YES	YES	YES	YES	3'UTR,3'UTR	3'UTR	3'UTR	3'UTR	Stop codon	NO
AT3G03160	Q9M9N5	AT3G03160		B-cell receptor-associated-like protein	STRINGENT	STRINGENT	STRINGENT	NO	YES	YES	YES	3'UTR	NO	3'UTR	3'UTR	NO	3'UTR
AT3G03250	A0A1I9LT02, A0A1I9LT03, Q9M9P3	UGP1	AtUGP1, UGP, UGP1	UDP-GLUCOSE PYROPHOSPHORYLASE 1	STRINGENT	STRINGENT	STRINGENT	YES	NO	YES	YES	3'UTR,3'UTR,3'UTR	NO	3'UTR	3'UTR	3' UTR	3'UTR
AT3G03380	A0A1I9LPZ9, Q8RY22	DEG7	DEG7, DegP7	DegP protease 7	STRINGENT	STRINGENT	STRINGENT	YES	YES	YES	YES	3'UTR,3'UTR	NO	3'UTR	3'UTR	Stop codon	3'UTR
AT3G03890	Q8LDU1, Q93WM0, Q9SRW6	AT3G03890		FMN binding protein	STRINGENT	STRINGENT	N.A.	YES	NO	NO	NO	3'UTR,3'UTR	NO	3'UTR	3'UTR	Stop codon	3'UTR
AT3G03920	Q8VZT0	AT3G03920		H/ACA ribonucleoprotein complex, subunit Gar1/Naf1 protein	STRINGENT	STRINGENT	STRINGENT	YES	YES	YES	YES	3'UTR	3'UTR	3'UTR	3'UTR	NO	NO
AT3G03960	Q94K05	AT3G03960		TCP-1/cpn60 chaperonin family protein	STRINGENT	STRINGENT	STRINGENT	YES	YES	YES	YES	3'UTR	NO	3'UTR	3'UTR	Stop codon	3'UTR
AT3G04090	Q9M8W5	SIP1A	SIP1;1, SIP1A	small and basic intrinsic protein 1A	STRINGENT	N.A.	STRINGENT	NO	NO	YES	YES	3'UTR	NO	3'UTR	3'UTR	3' UTR	3'UTR
AT3G04120	P25858	GAPC1	GAPC, GAPC-1, GAPC1	glyceraldehyde-3-phosphate dehydrogenase C subunit 1	STRINGENT	STRINGENT	STRINGENT	YES	YES	YES	YES	3'UTR	NO	3'UTR	3'UTR, CDS	3' UTR	NO
AT3G04400	F4J3P1, P49690	emb2171	emb2171	Ribosomal protein L14p/L23e family protein	STRINGENT	STRINGENT	STRINGENT	YES	YES	YES	YES	CDS,CDS,3'UTR,3'UTR	NO	3'UTR	3'UTR, 5'UTR, CDS	Stop codon	NO
AT3G04600	F4J4T3, Q9SR15	AT3G04600		Nucleotidylyl transferase superfamily protein	STRINGENT	STRINGENT	STRINGENT	YES	YES	YES	YES	3'UTR,3'UTR,3'UTR	NO	NO	3'UTR	NO	3'UTR
AT3G04780	Q9SQZ9	AT3G04780		PITH domain protein (DUF1000)	STRINGENT	STRINGENT	STRINGENT	YES	YES	YES	YES	3'UTR	NO	3'UTR	3'UTR	NO	3'UTR
AT3G04830	Q93WC8, Q9CAU9	AT3G04830		Protein prenylyltransferase superfamily protein	STRINGENT	N.A.	STRINGENT	NO	NO	YES	YES	3'UTR,3'UTR	NO	3'UTR	3'UTR	Stop codon	3'UTR
AT3G04840	Q9CAV0	AT3G04840		Ribosomal protein S3Ae	STRINGENT	STRINGENT	STRINGENT	YES	YES	YES	YES	3'UTR	NO	3'UTR	3'UTR	Stop codon	NO
AT3G04870	Q38893	ZDS	PDE181, SPC1, ZDS	zeta-carotene desaturase	STRINGENT	STRINGENT	N.A.	YES	NO	NO	NO	3'UTR,3'UTR	3'UTR	3'UTR	3'UTR	Stop codon	3'UTR
AT3G04920	A0A1I9LMY7, Q9SS17	AT3G04920		Ribosomal protein S24e family protein	STRINGENT	STRINGENT	STRINGENT	YES	YES	YES	YES	3'UTR,3'UTR	NO	3'UTR	3'UTR	Stop codon	3'UTR
AT3G05000	Q9CAW4	AT3G05000		Transport protein particle (TRAPP) component	STRINGENT	STRINGENT	STRINGENT	YES	YES	YES	YES	3'UTR	NO	3'UTR	3'UTR	NO	3'UTR
AT3G05020	P11829	ACP1	ACP, ACP1, AtACP1	acyl carrier protein 1	STRINGENT	N.A.	STRINGENT	NO	NO	NO	YES	3'UTR	NO	3'UTR	3'UTR	NO	NO
AT3G05420	Q9MA55, Q9MA55-2	ACBP4	ACBP4, AtACBP4	acyl-CoA binding protein 4	STRINGENT	STRINGENT	STRINGENT	YES	NO	YES	NO	3'UTR,3'UTR	NO	3'UTR	3'UTR	Stop codon	3'UTR
AT3G05530	Q9SEI2	RPT5A	ATS6A.2, RPT5A	regulatory particle triple-A ATPase 5A	STRINGENT	STRINGENT	STRINGENT	YES	YES	YES	YES	3'UTR	NO	3'UTR	3'UTR	NO	3'UTR
AT3G05545	Q84WW4	AT3G05545		RING/U-box superfamily protein	STRINGENT	STRINGENT	STRINGENT	YES	NO	YES	NO	3'UTR	3'UTR	3'UTR	3'UTR	3' UTR	3'UTR
AT3G05560	Q9M9W1	AT3G05560		Ribosomal L22e protein family	STRINGENT	STRINGENT	STRINGENT	YES	YES	YES	YES	3'UTR,3'UTR,3'UTR	NO	3'UTR	3'UTR	Stop codon	NO
AT3G05590	A0A1I9LT16, P42791	RPL18	RPL18	ribosomal protein L18	STRINGENT	STRINGENT	STRINGENT	YES	YES	YES	YES	CDS,CDS,CDS,3'UTR,3'UTR,3'UTR	NO	3'UTR	3'UTR, 5'UTR, CDS	Stop codon	NO
AT3G06040	Q9M7T1	AT3G06040		Ribosomal protein L12/ ATP-dependent Clp protease adaptor protein ClpS family protein	STRINGENT	STRINGENT	STRINGENT	YES	YES	YES	YES	3'UTR,3'UTR	3'UTR	3'UTR	3'UTR	NO	NO
AT3G06050	A0A1I9LRF4, Q9M7T0	PRXIIF	ATPRXIIF, PRXIIF	peroxiredoxin IIF	STRINGENT	STRINGENT	STRINGENT	YES	NO	YES	YES	3'UTR,3'UTR	NO	3'UTR	3'UTR	Stop codon	NO
AT3G06310	B3H556, Q9SQT4	AT3G06310		Cox19-like CHCH family protein	STRINGENT	STRINGENT	STRINGENT	YES	YES	YES	YES	3'UTR,3'UTR	NO	3'UTR	3'UTR	Stop codon	3'UTR
AT3G06355					STRINGENT	STRINGENT	STRINGENT	YES	YES	N.E.	YES	CDS	NO	N.A.	N.A.	NO	NO
AT3G06483	Q9SBJ1	PDK	ATPDHK, PDK	pyruvate dehydrogenase kinase	STRINGENT	STRINGENT	N.A.	YES	NO	NO	NO	3'UTR	NO	3'UTR	3'UTR	Stop codon	3'UTR
AT3G06510	Q93Y07, Q93Y07-2	SFR2	ATSFR2, SFR2	Glycosyl hydrolase superfamily protein	STRINGENT	STRINGENT	STRINGENT	YES	NO	YES	YES	3'UTR,3'UTR	NO	3'UTR	3'UTR	Stop codon	NO
AT3G06650	Q9C522	ACLB-1	ACLB-1	ATP-citrate lyase B-1	STRINGENT	STRINGENT	STRINGENT	YES	YES	YES	NO	3'UTR,3'UTR	NO	3'UTR	3'UTR	NO	3'UTR
AT3G06700	Q9M7X7	AT3G06700		Ribosomal L29e protein family	STRINGENT	STRINGENT	STRINGENT	YES	YES	YES	YES	3'UTR,3'UTR,3'UTR	NO	3'UTR	3'UTR, CDS	Stop codon	NO
AT3G06860	Q8W4D2, Q9ZPI5	MFP2	ATMFP2, MFP2	multifunctional protein 2	STRINGENT	STRINGENT	STRINGENT	YES	NO	YES	YES	3'UTR	NO	3'UTR	3'UTR	3' UTR	3'UTR
AT3G07100	Q9SFU0	ERMO2	AtSEC24A, ERMO2, SEC24A	Sec23/Sec24 protein transport family protein	STRINGENT	STRINGENT	STRINGENT	YES	NO	YES	YES	3'UTR	3'UTR	3'UTR	3'UTR	3' UTR, CDS	3'UTR
AT3G07110	F4JD96, Q9SFU1	AT3G07110		Ribosomal protein L13 family protein	STRINGENT	STRINGENT	STRINGENT	YES	YES	YES	YES	3'UTR,3'UTR	3'UTR	3'UTR	3'UTR	Stop codon	3'UTR
AT3G07160	A0A178V7F9, Q56Z18, Q8LPI6, Q9SFU6	GSL10	ATGSL10, CALS9, gsl10, GSL10	glucan synthase-like 10	STRINGENT	STRINGENT	STRINGENT	YES	NO	YES	YES	3'UTR,3'UTR,3'UTR	NO	3'UTR, CDS	3'UTR	Stop codon	3'UTR
AT3G07170	A0A1I9LTS5, C0Z2J7, Q9SFU7	AT3G07170		Sterile alpha motif (SAM) domain-containing protein	STRINGENT	N.A.	STRINGENT	NO	NO	YES	YES	3'UTR	5'UTR	3'UTR	3'UTR	Stop codon	3'UTR
AT3G07480	Q9SRR8	AT3G07480		2Fe-2S ferredoxin-like superfamily protein	STRINGENT	STRINGENT	STRINGENT	YES	YES	YES	YES	3'UTR	NO	3'UTR	3'UTR	NO	NO
AT3G07560	Q9SRR0, Q9SRR0-2	PEX13	APM2, PEX13	peroxin 13	STRINGENT	STRINGENT	STRINGENT	YES	YES	YES	YES	3'UTR	StartCodon, 5'UTR	3'UTR	3'UTR	3' UTR	NO
AT3G07568	Q8W482	AT3G07568		fanconi anemia group D2 protein	STRINGENT	STRINGENT	STRINGENT	YES	YES	YES	YES	3'UTR	NO	3'UTR	3'UTR	3' UTR	3'UTR
AT3G07680	Q9S7M9	p24beta2	p24beta2	emp24/gp25L/p24 family/GOLD family protein	STRINGENT	STRINGENT	STRINGENT	YES	YES	YES	YES	3'UTR	3'UTR	3'UTR	3'UTR	Stop codon	3'UTR
AT3G07880	Q9SFC6	SCN1	SCN1	Immunoglobulin E-set superfamily protein	STRINGENT	STRINGENT	STRINGENT	YES	YES	YES	YES	3'UTR	NO	3'UTR	3'UTR	Stop codon	3'UTR
AT3G07910	A0A384KEV7	AT3G07910		reactive oxygen species modulator-like protein	STRINGENT	STRINGENT	STRINGENT	YES	YES	YES	YES	3'UTR	NO	3'UTR	3'UTR	Stop codon	3'UTR
AT3G08510	F4IX90, Q39033	PLC2	ATPLC2, PLC2	phospholipase C 2	STRINGENT	STRINGENT	STRINGENT	YES	YES	YES	YES	3'UTR,3'UTR,3'UTR,3'UTR	NO	3'UTR	3'UTR, 5'UTR	3' UTR	3'UTR
AT3G08520	P62120	AT3G08520		Ribosomal protein L41 family	STRINGENT	STRINGENT	STRINGENT	YES	YES	YES	YES	3'UTR	NO	3'UTR	3'UTR, CDS	NO	NO
AT3G08530	Q0WLB5	AT3G08530	AtCHC2, CHC2	Clathrin, heavy chain	STRINGENT	STRINGENT	STRINGENT	YES	YES	YES	YES	3'UTR	3'UTR	3'UTR	3'UTR	3' UTR	3'UTR
AT3G08580	C0Z2I5, P31167	AAC1	AAC1	ADP/ATP carrier 1	STRINGENT	STRINGENT	STRINGENT	YES	YES	YES	YES	CDS,CDS,3'UTR,3'UTR	NO	3'UTR	3'UTR	Stop codon	NO
AT3G08590	Q9M9K1	iPGAM2	iPGAM2	Phosphoglycerate mutase, 2,3-bisphosphoglycerate-independent	STRINGENT	STRINGENT	STRINGENT	YES	YES	YES	YES	3'UTR,3'UTR	NO	3'UTR	3'UTR	Stop codon	NO
AT3G08610	Q9C9Z5	AT3G08610		NADH dehydrogenase ubiquinone 1 alpha subcomplex subunit	STRINGENT	STRINGENT	STRINGENT	YES	YES	YES	YES	CDS,3'UTR	NO	3'UTR	3'UTR	3' UTR	NO
AT3G08690	A0A178VAX4, P35134	UBC11	ATUBC11, UBC11	ubiquitin-conjugating enzyme 11	STRINGENT	STRINGENT	STRINGENT	YES	NO	YES	NO	3'UTR,3'UTR	NO	3'UTR	3'UTR	Stop codon	3'UTR
AT3G08740	Q8VZW6, Q9C9Y5	AT3G08740		elongation factor P (EF-P) family protein	STRINGENT	STRINGENT	STRINGENT	YES	YES	YES	YES	3'UTR	NO	3'UTR	3'UTR, 5'UTR	Stop codon	NO
AT3G08930	Q9SR93	AT3G08930		LMBR1-like membrane protein	STRINGENT	STRINGENT	STRINGENT	YES	NO	YES	YES	3'UTR	3'UTR	3'UTR	3'UTR	NO	NO
AT3G09200	A8MQR4, Q42112	AT3G09200		Ribosomal protein L10 family protein	STRINGENT	STRINGENT	STRINGENT	YES	YES	YES	YES	CDS,CDS,3'UTR,3'UTR	5'UTR	3'UTR	3'UTR, CDS	Stop codon	NO
AT3G09470	A0A178V887, Q94AA1, Q94AA1-2	AT3G09470	AtUNC93	Major facilitator superfamily protein	STRINGENT	STRINGENT	STRINGENT	YES	YES	YES	YES	CDS	NO	3'UTR	3'UTR	coding_intron	3'UTR
AT3G09500	Q9SF53	AT3G09500		Ribosomal L29 family protein	STRINGENT	STRINGENT	STRINGENT	YES	YES	YES	YES	3'UTR	NO	3'UTR	3'UTR, CDS	Stop codon	NO
AT3G09630	Q2V3X4, Q9SF40	AT3G09630	SAC56	Ribosomal protein L4/L1 family	STRINGENT	STRINGENT	STRINGENT	YES	YES	YES	YES	3'UTR,3'UTR	NO	3'UTR	3'UTR	Stop codon	3'UTR
AT3G09735	Q93VI0	AT3G09735		S1FA-like DNA-binding protein	STRINGENT	STRINGENT	STRINGENT	YES	NO	YES	YES	3'UTR	NO	3'UTR	3'UTR	Stop codon	3'UTR
AT3G09740	Q9SF29	71	ATSYP71, SYP71	syntaxin of plants 71	STRINGENT	STRINGENT	STRINGENT	YES	YES	YES	YES	3'UTR	NO	3'UTR	3'UTR, CDS	3' UTR	3'UTR
AT3G09810	Q8LG77, Q9SF26	IDH-VI	IDH-VI	isocitrate dehydrogenase VI	STRINGENT	STRINGENT	STRINGENT	YES	NO	YES	YES	3'UTR	NO	NO	NO	3' UTR	3'UTR
AT3G09820	Q9SF85, Q9SF85-2	ADK1	ADK1, ATADK1	adenosine kinase 1	STRINGENT	STRINGENT	STRINGENT	YES	YES	YES	YES	3'UTR,3'UTR	NO	3'UTR	3'UTR	NO	3'UTR
AT3G09840	P54609	CDC48	ATCDC48, AtCDC48A, CDC48, CDC48A	cell division cycle 48	STRINGENT	STRINGENT	STRINGENT	YES	YES	YES	YES	3'UTR	NO	3'UTR	3'UTR, 5'UTR	Stop codon	NO
AT3G09860	Q6IDB3	AT3G09860		actin T1-like protein	STRINGENT	STRINGENT	STRINGENT	YES	YES	YES	YES	3'UTR	NO	3'UTR	3'UTR, 5'UTR	Stop codon	NO
AT3G09900	A0A178V885, Q9SF91	RABE1e	ATRAB8E, ATRABE1E, RABE1e	RAB GTPase homolog E1E	STRINGENT	STRINGENT	STRINGENT	YES	YES	YES	YES	3'UTR	3'UTR	3'UTR	3'UTR	3' UTR	3'UTR
AT3G10090	Q9SR73	AT3G10090		Nucleic acid-binding, OB-fold-like protein	STRINGENT	STRINGENT	STRINGENT	YES	NO	YES	YES	3'UTR	NO	3'UTR	3'UTR	NO	3'UTR
AT3G10380	A0A178VA80, A0A1I9LSY6, Q93YU5	SEC8	ATSEC8, SEC8	subunit of exocyst complex 8	STRINGENT	STRINGENT	STRINGENT	YES	NO	YES	YES	3'UTR,3'UTR	NO	3'UTR	3'UTR	NO	3'UTR
AT3G10410	P32826	SCPL49	CPY, SCPL49	SERINE CARBOXYPEPTIDASE-LIKE 49	STRINGENT	STRINGENT	STRINGENT	YES	NO	YES	YES	3'UTR	NO	3'UTR	3'UTR	Stop codon	3'UTR
AT3G10770	A0A178VHE9, F4J4X8, Q9SG83	AT3G10770		Single-stranded nucleic acid binding R3H protein	STRINGENT	STRINGENT	STRINGENT	YES	NO	YES	YES	3'UTR,3'UTR	3'UTR	3'UTR	3'UTR	NO	3'UTR
AT3G10850	O24496	GLY2	GLX2-2, GLY2	Metallo-hydrolase/oxidoreductase superfamily protein	STRINGENT	STRINGENT	STRINGENT	YES	YES	YES	YES	3'UTR	3'UTR	3'UTR	3'UTR	Stop codon	3'UTR
AT3G10860	Q9SG91	AT3G10860		Cytochrome b-c1 complex, subunit 8 protein	STRINGENT	STRINGENT	STRINGENT	YES	YES	YES	YES	3'UTR,3'UTR	NO	3'UTR	3'UTR, 5'UTR	Stop codon	NO
AT3G10920	F4J504, O81235	MSD1	ATMSD1, AtSOD1, MEE33, MSD1	manganese superoxide dismutase 1	STRINGENT	STRINGENT	STRINGENT	YES	NO	YES	YES	3'UTR,3'UTR	NO	3'UTR	3'UTR	Stop codon	NO
AT3G11120	P62120	AT3G11120		Ribosomal protein L41 family	STRINGENT	STRINGENT	STRINGENT	YES	YES	YES	YES	3'UTR	NO	3'UTR	3'UTR, CDS	Stop codon	NO
AT3G11130	Q0WNJ6	AT3G11130	AtCHC1, CHC1	Clathrin, heavy chain	STRINGENT	STRINGENT	STRINGENT	YES	YES	YES	YES	3'UTR	3'UTR	3'UTR	3'UTR	3' UTR	3'UTR
AT3G11170	P46310, Q56ZV3	FAD7	AtFAD7, FAD7, FADD	fatty acid desaturase 7	STRINGENT	STRINGENT	N.A.	YES	NO	NO	NO	3'UTR	NO	3'UTR	3'UTR	Stop codon	NO
AT3G11400	F4J6A1, Q56ZI6, Q9SSJ0	EIF3G1	ATEIF3G1, EIF3G1	eukaryotic translation initiation factor 3G1	STRINGENT	STRINGENT	STRINGENT	YES	NO	YES	YES	3'UTR,3'UTR	NO	3'UTR	3'UTR	NO	NO
AT3G11500	A0A178V663, Q9CAX7	AT3G11500		Small nuclear ribonucleoprotein family protein	STRINGENT	STRINGENT	STRINGENT	YES	YES	YES	YES	3'UTR	NO	3'UTR	3'UTR	Stop codon	NO
AT3G11510	Q9CAX6	AT3G11510		Ribosomal protein S11 family protein	STRINGENT	STRINGENT	STRINGENT	YES	YES	YES	YES	3'UTR	NO	3'UTR	3'UTR	NO	NO
AT3G11630	Q96291	AT3G11630	2CPA	Thioredoxin superfamily protein	STRINGENT	STRINGENT	STRINGENT	YES	YES	YES	YES	3'UTR	3'UTR	3'UTR	3'UTR, CDS	Stop codon	NO
AT3G11710	Q9ZPI1	ATKRS-1	ATKRS-1	lysyl-tRNA synthetase 1	STRINGENT	STRINGENT	STRINGENT	YES	YES	YES	YES	3'UTR	NO	3'UTR	3'UTR	NO	3'UTR
AT3G11730	Q9ZRE2	ATFP8	ATFP8, ATRABD1, RABD1	Ras-related small GTP-binding family protein	STRINGENT	STRINGENT	STRINGENT	YES	NO	YES	YES	3'UTR	NO	3'UTR, CDS	3'UTR	Stop codon	3'UTR
AT3G11780	F4J7G5, Q9SF20	AT3G11780		MD-2-related lipid recognition domain-containing protein / ML domain-containing protein	STRINGENT	N.A.	STRINGENT	NO	NO	YES	NO	3'UTR,3'UTR	NO	3'UTR	3'UTR	Stop codon	3'UTR
AT3G11830	Q9SF16, Q9SF16-2	AT3G11830		TCP-1/cpn60 chaperonin family protein	STRINGENT	STRINGENT	STRINGENT	YES	YES	YES	YES	3'UTR,3'UTR	NO	3'UTR	3'UTR	NO	3'UTR
AT3G11940	P51427	RPS5A	AML1, ATRPS5A, RPS5A	ribosomal protein 5A	STRINGENT	STRINGENT	STRINGENT	YES	YES	YES	YES	5'UTR,3'UTR,3'UTR	NO	3'UTR	3'UTR, 5'UTR, CDS	Stop codon	NO
AT3G11945	F4J8K0, Q1ACB3	HST	ATHST, HST, PDS2	homogentisate prenyltransferase	STRINGENT	STRINGENT	N.A.	YES	NO	NO	NO	3'UTR,3'UTR	3'UTR	3'UTR	3'UTR	NO	3'UTR
AT3G12120	P46313	FAD2	AtFAD2, FAD2	fatty acid desaturase 2	STRINGENT	STRINGENT	STRINGENT	YES	YES	YES	YES	3'UTR,3'UTR,3'UTR	NO	3'UTR	3'UTR, 5'UTR, CDS	NO	NO
AT3G12260	Q9LHI0	AT3G12260		LYR family of Fe/S cluster biogenesis protein	STRINGENT	STRINGENT	STRINGENT	YES	YES	YES	YES	3'UTR	NO	3'UTR	3'UTR	3' UTR, Stop codon	NO
AT3G12290	Q9LHH7	AT3G12290	MTHFD1	Amino acid dehydrogenase family protein	STRINGENT	STRINGENT	STRINGENT	YES	NO	YES	YES	CDS,3'UTR	NO	3'UTR	3'UTR	Stop codon	NO
AT3G12390	Q9LHG9	AT3G12390		Nascent polypeptide-associated complex (NAC), alpha subunit family protein	STRINGENT	STRINGENT	STRINGENT	YES	YES	YES	YES	3'UTR	NO	3'UTR	3'UTR	NO	3'UTR
AT3G12490	A0A178VLG4, A0A2H1ZEH9, Q8H0X6, Q8H0X6-2	CYSB	ATCYS6, ATCYSB, CYSB	cystatin B	STRINGENT	N.A.	STRINGENT	NO	NO	NO	YES	3'UTR	NO	3'UTR	3'UTR	NO	3'UTR
AT3G12587	Q9C7B2, Q9LHK3	AT3G12587		Oligosaccaryltransferase	STRINGENT	STRINGENT	STRINGENT	YES	YES	YES	YES	3'UTR	3'UTR	3'UTR	3'UTR	NO	3'UTR
AT3G12760	Q9LTV9	AT3G12760		defective in cullin neddylation protein	STRINGENT	N.A.	STRINGENT	NO	NO	YES	YES	3'UTR	NO	NO	3'UTR	NO	NO
AT3G12780	Q9LD57	1	1	phosphoglycerate kinase 1	STRINGENT	STRINGENT	N.A.	YES	YES	NO	NO	3'UTR	NO	3'UTR	3'UTR, CDS, 5'UTR	Stop codon	NO
AT3G12800	Q9LTV6	SDRB	DECR, SDRB	short-chain dehydrogenase-reductase B	STRINGENT	STRINGENT	STRINGENT	YES	YES	YES	YES	3'UTR	NO	3'UTR	3'UTR	NO	NO
AT3G12965					STRINGENT	STRINGENT	STRINGENT	YES	YES	YES	YES	CDS	NO	N.A.	N.A.	noncoding_exon	NO
AT3G13040	Q949U2	AT3G13040	gammaMYB2	myb-like HTH transcriptional regulator family protein	STRINGENT	STRINGENT	STRINGENT	YES	NO	YES	NO	3'UTR,3'UTR,3'UTR	NO	3'UTR	3'UTR	Stop codon	3'UTR
AT3G13120	Q9LK61	AT3G13120	PRPS10	Ribosomal protein S10p/S20e family protein	STRINGENT	STRINGENT	N.A.	YES	YES	NO	NO	3'UTR,3'UTR	NO	3'UTR	3'UTR	3' UTR	NO
AT3G13200	Q9LK52	EMB2769	EMB2769	Cwf15 / Cwc15 cell cycle control family protein	STRINGENT	STRINGENT	STRINGENT	YES	NO	YES	YES	CDS,3'UTR	NO	3'UTR	3'UTR	Stop codon	3'UTR
AT3G13300	A0A1I9LRS8, Q9LTT8, Q9LTT8-2	VCS	VCS	Transducin/WD40 repeat-like superfamily protein	STRINGENT	STRINGENT	STRINGENT	YES	YES	YES	YES	3'UTR,3'UTR,3'UTR	NO	3'UTR	3'UTR	Stop codon	3'UTR
AT3G13410	Q93WB8	AT3G13410		2-C-methyl-D-erythritol 4-phosphate cytidylyltransferase	STRINGENT	STRINGENT	STRINGENT	YES	YES	YES	YES	3'UTR	NO	3'UTR	3'UTR	Stop codon	3'UTR
AT3G13460	F4JDC2, F4JDC3, F4JDC5, Q9LJE5	ECT2	ECT2	evolutionarily conserved C-terminal region 2	STRINGENT	STRINGENT	STRINGENT	NO	YES	YES	YES	3'UTR,3'UTR,3'UTR,3'UTR	CDS	3'UTR	3'UTR	3' UTR	NO
AT3G13570	A0A178VHX3, Q9LHP2	SCL30A	At-SCL30A, SCL30A	SC35-like splicing factor 30A	STRINGENT	STRINGENT	STRINGENT	YES	YES	YES	YES	3'UTR	NO	3'UTR	3'UTR	Stop codon	3'UTR
AT3G13580	Q9LHP1	AT3G13580		Ribosomal protein L30/L7 family protein	STRINGENT	STRINGENT	STRINGENT	YES	YES	YES	YES	3'UTR,3'UTR,3'UTR,3'UTR,3'UTR,3'UTR,3'UTR,3'UTR,3'UTR	NO	3'UTR	3'UTR	Stop codon	3'UTR
AT3G13740	A0A1I9LL75, A0A1I9LL76, A0A1I9LL77, A0A1I9LL78, F4JEI2, Q94F12	AT3G13740	RNC4	Ribonuclease III family protein	STRINGENT	STRINGENT	N.A.	YES	YES	NO	NO	3'UTR,3'UTR,3'UTR,3'UTR,3'UTR,3'UTR	NO	3'UTR	3'UTR	NO	3'UTR
AT3G13750	Q0WKW5, Q9SCW1	BGAL1	BGAL1	beta galactosidase 1	STRINGENT	STRINGENT	STRINGENT	YES	YES	YES	YES	3'UTR	NO	3'UTR	3'UTR, 5'UTR	NO	NO
AT3G13870	P93042, P93042-2	3	GOM8, RHD3	Root hair defective 3 GTP-binding protein (RHD3)	STRINGENT	STRINGENT	STRINGENT	YES	NO	YES	NO	3'UTR,3'UTR	3'UTR	3'UTR	3'UTR	3' UTR	3'UTR
AT3G13882	F4JEK7, Q84R26	AT3G13882		Ribosomal protein L34	STRINGENT	STRINGENT	STRINGENT	YES	NO	YES	YES	3'UTR,3'UTR	NO	3'UTR	3'UTR	NO	3'UTR
AT3G13920	A0A1I9LSZ7, A8MRZ7, F4JEL4, F4JEL5, P41376	EIF4A1	EIF4A1, RH4, TIF4A1	eukaryotic translation initiation factor 4A1	STRINGENT	STRINGENT	STRINGENT	YES	YES	YES	YES	3'UTR,3'UTR,3'UTR,3'UTR	NO	3'UTR	3'UTR, CDS	Stop codon	NO
AT3G13930	A0A178VAA8, Q8RWN9	AT3G13930	mtE2-2	Dihydrolipoamide acetyltransferase, long form protein	STRINGENT	STRINGENT	STRINGENT	YES	NO	YES	YES	3'UTR	NO	3'UTR	3'UTR	Stop codon	3'UTR
AT3G14100	Q9LJH8	AT3G14100		RNA-binding (RRM/RBD/RNP motifs) family protein	STRINGENT	STRINGENT	STRINGENT	YES	NO	YES	NO	3'UTR	5'UTR, StartCodon	3'UTR	3'UTR	NO	3'UTR
AT3G14290	Q42134	PAE2	PAE2	20S proteasome alpha subunit E2	STRINGENT	STRINGENT	STRINGENT	YES	YES	YES	YES	3'UTR	NO	3'UTR	3'UTR	Stop codon	3'UTR
AT3G14350	F4JFU5, F4JFU7, Q9LUL4	SRF7	SRF7	STRUBBELIG-receptor family 7	STRINGENT	STRINGENT	STRINGENT	YES	YES	YES	YES	3'UTR,3'UTR,3'UTR	NO	3'UTR	3'UTR	Stop codon	3'UTR
AT3G14415	A0A384L6X3, Q9LRS0	GOX2	GOX2	Aldolase-type TIM barrel family protein	STRINGENT	STRINGENT	STRINGENT	YES	YES	YES	NO	3'UTR,3'UTR,3'UTR	NO	3'UTR	3'UTR, CDS, 5'UTR	Stop codon	NO
AT3G14420	A8MS37, B3H4B8, Q2V3V9, Q9LRR9, Q9LRR9-2	GOX1	GOX1	Aldolase-type TIM barrel family protein	STRINGENT	STRINGENT	N.A.	YES	YES	NO	NO	3'UTR,3'UTR,3'UTR,3'UTR,3'UTR,3'UTR	NO	3'UTR	3'UTR, 5'UTR, CDS	Stop codon	NO
AT3G14595	Q1H563	AT3G14595		Ribosomal protein L18ae family	STRINGENT	STRINGENT	STRINGENT	YES	NO	YES	YES	3'UTR	NO	3'UTR	3'UTR	NO	3'UTR
AT3G14600	Q9LUD4	AT3G14600		Ribosomal protein L18ae/LX family protein	STRINGENT	STRINGENT	STRINGENT	YES	YES	YES	YES	3'UTR	NO	3'UTR	3'UTR	Stop codon	3'UTR
AT3G14930	Q93ZB6, Q93ZB6-2	HEME1	HEME1	Uroporphyrinogen decarboxylase	STRINGENT	STRINGENT	N.A.	YES	YES	NO	NO	3'UTR,3'UTR,3'UTR	3'UTR	3'UTR	3'UTR	3' UTR	NO
AT3G15000	A0A178VHP9, Q9LKA5	RIP1	MORF8, RIP1	cobalt ion binding protein	STRINGENT	STRINGENT	STRINGENT	YES	YES	YES	YES	3'UTR	5'UTR	3'UTR	3'UTR	Stop codon	3'UTR
AT3G15190	Q9ASV6	PRPS20	PRPS20	chloroplast 30S ribosomal protein S20	STRINGENT	STRINGENT	STRINGENT	YES	YES	NO	YES	3'UTR	NO	3'UTR	3'UTR, 5'UTR	Stop codon	NO
AT3G15360	Q9SEU6	TRX-M4	ATHM4, ATM4, TRX-M4	thioredoxin M-type 4	STRINGENT	STRINGENT	STRINGENT	YES	YES	YES	YES	CDS,3'UTR	NO	3'UTR	3'UTR, CDS, 5'UTR	Stop codon	NO
AT3G15580	Q9LRP7	APG8H	APG8H, ATG8I	Ubiquitin-like superfamily protein	STRINGENT	N.A.	STRINGENT	NO	NO	YES	NO	3'UTR	3'UTR	3'UTR	3'UTR	Stop codon	3'UTR
AT3G15640	A8MRD7, Q9LW15	AT3G15640		Rubredoxin-like superfamily protein	STRINGENT	STRINGENT	STRINGENT	YES	YES	YES	YES	3'UTR,3'UTR	NO	3'UTR	3'UTR	3' UTR	3'UTR
AT3G15660	Q8LBK6	GRX4	ATGRX4, GRX4, GRXS15	glutaredoxin 4	STRINGENT	N.A.	STRINGENT	NO	NO	YES	NO	3'UTR,3'UTR	NO	3'UTR	3'UTR	NO	3'UTR
AT3G15730	Q38882, Q84WM2	PLDALPHA1	PLD, PLDALPHA1	phospholipase D alpha 1	STRINGENT	STRINGENT	STRINGENT	YES	YES	YES	YES	3'UTR	3'UTR	3'UTR	3'UTR	3' UTR	NO
AT3G15840	B3H4M0, F4J034, F4J036, F4J037, Q9LVZ5	PIFI	PIFI	post-illumination chlorophyll fluorescence increase	STRINGENT	STRINGENT	N.A.	YES	NO	NO	NO	3'UTR,3'UTR,3'UTR,3'UTR,3'UTR	NO	3'UTR, CDS	3'UTR, CDS	NO	NO
AT3G16080	A0A1I9LRU8, Q8LEM8	AT3G16080		Zinc-binding ribosomal protein family protein	STRINGENT	STRINGENT	STRINGENT	YES	YES	YES	YES	3'UTR,3'UTR	NO	3'UTR	3'UTR	NO	3'UTR
AT3G16100	Q9LW76	RABG3c	ATRAB7D, ATRABG3C, RABG3c	RAB GTPase homolog G3C	STRINGENT	STRINGENT	STRINGENT	YES	NO	YES	NO	3'UTR	3'UTR	3'UTR	3'UTR	NO	3'UTR
AT3G16140	Q9SUI7	PSAH-1	PSAH-1	photosystem I subunit H-1	STRINGENT	STRINGENT	N.A.	YES	NO	NO	NO	3'UTR	NO	3'UTR, CDS	3'UTR, 5'UTR, CDS	Stop codon	NO
AT3G16190	Q93Z51	AT3G16190		Isochorismatase family protein	STRINGENT	N.A.	STRINGENT	NO	NO	YES	NO	3'UTR	NO	NO	3'UTR	NO	3'UTR
AT3G16240	A0A178VJN7, C0Z2I4, Q41951	DELTA-TIP	AQP1, ATTIP2;1, DELTA-TIP, DELTA-TIP1, TIP2;1	delta tonoplast integral protein	STRINGENT	STRINGENT	N.A.	NO	YES	NO	NO	3'UTR	NO	NO	5'UTR, 3'UTR, CDS	NO	NO
AT3G16480	C0Z331, O04308	MPPalpha	MPPalpha	mitochondrial processing peptidase alpha subunit	STRINGENT	N.A.	STRINGENT	NO	NO	YES	NO	3'UTR	NO	3'UTR	3'UTR	Stop codon	3'UTR
AT3G16640	P31265	TCTP	AtTCTP1, TCTP1	translationally controlled tumor protein	STRINGENT	STRINGENT	STRINGENT	YES	YES	YES	YES	5'UTR,CDS,3'UTR	NO	3'UTR	3'UTR, CDS, 5'UTR	Stop codon	NO
AT3G16690	A0A1I9LLQ4, A0A1I9LLQ5, Q9LUR4	SWEET16	AtSWEET16, SWEET16	Nodulin MtN3 family protein	STRINGENT	STRINGENT	STRINGENT	YES	NO	YES	NO	3'UTR,3'UTR,3'UTR	NO	NO	NO	NO	NO
AT3G16770	P42736	EBP	ATEBP, EBP, ERF72, RAP2.3	ethylene-responsive element binding protein	STRINGENT	STRINGENT	STRINGENT	YES	YES	YES	YES	3'UTR	NO	3'UTR	3'UTR	NO	NO
AT3G17020	A0A1I9LPQ2, Q9LSP5	AT3G17020		Adenine nucleotide alpha hydrolases-like superfamily protein	STRINGENT	STRINGENT	STRINGENT	YES	YES	YES	YES	3'UTR,3'UTR	NO	3'UTR	3'UTR	Stop codon	3'UTR
AT3G17210	Q9LUV2	HS1	ATHS1, HS1	heat stable protein 1	STRINGENT	STRINGENT	STRINGENT	YES	YES	NO	YES	3'UTR,3'UTR	NO	3'UTR	3'UTR	NO	3'UTR
AT3G17410	Q9LUT0	AT3G17410	CARK1	Protein kinase superfamily protein	STRINGENT	STRINGENT	STRINGENT	YES	NO	YES	NO	3'UTR,3'UTR	NO	3'UTR	3'UTR	Stop codon	3'UTR
AT3G17780	Q9LSH0	AT3G17780		B-cell receptor-associated-like protein	STRINGENT	N.A.	STRINGENT	NO	NO	YES	YES	3'UTR	3'UTR	3'UTR	NO	Stop codon	3'UTR
AT3G17800	Q9LVJ0, Q9LVJ0-2	AT3G17800		alanine-tRNA ligase, putative (DUF760)	STRINGENT	STRINGENT	N.A.	YES	NO	NO	NO	CDS,CDS,3'UTR,3'UTR	NO	3'UTR	3'UTR, CDS	Stop codon	NO
AT3G18060	Q9LV35	AT3G18060		transducin family protein / WD-40 repeat family protein	STRINGENT	STRINGENT	STRINGENT	YES	NO	YES	YES	3'UTR	CDS	CDS, 3'UTR	3'UTR	3' UTR	3'UTR
AT3G18140	F4J7K1, Q9LV27	LST8-1	LST8-1	Transducin/WD40 repeat-like superfamily protein	STRINGENT	STRINGENT	STRINGENT	YES	YES	YES	YES	3'UTR,3'UTR	3'UTR	3'UTR	3'UTR	Stop codon	3'UTR
AT3G18165	Q949S9	MOS4	MOS4	modifier of snc1,4	STRINGENT	STRINGENT	STRINGENT	YES	NO	YES	YES	3'UTR	3'UTR	3'UTR	3'UTR	3' UTR	3'UTR
AT3G18290	Q8LPQ5	BTS	BTS, EMB2454	zinc finger protein-like protein	STRINGENT	STRINGENT	N.A.	YES	NO	NO	NO	3'UTR	3'UTR	3'UTR	3'UTR	Stop codon	3'UTR
AT3G18410	Q94C12	AT3G18410		NADH dehydrogenase ubiquinone 1 beta subcomplex subunit 10-B-like protein (Complex I subunit NDUFS6)	STRINGENT	STRINGENT	STRINGENT	YES	YES	YES	YES	3'UTR	NO	3'UTR	3'UTR	3' UTR	3'UTR
AT3G18740	Q9LSA3	RLK902		Ribosomal protein L7Ae/L30e/S12e/Gadd45 family protein	STRINGENT	STRINGENT	STRINGENT	YES	YES	YES	YES	3'UTR	3'UTR	3'UTR	3'UTR	NO	NO
AT3G18780	C0Z223, F4J8V9, Q96292	ACT2	ACT2, DER1, ENL2, FIZ2, LSR2	actin 2	STRINGENT	STRINGENT	STRINGENT	YES	NO	YES	NO	3'UTR,3'UTR,3'UTR	NO	3'UTR	3'UTR	NO	3'UTR
AT3G18820	Q9LS94	RAB7B	ATRAB7B, AtRabG1f, ATRABG3F, RAB71, RAB7B, RABG3F	RAB GTPase homolog G3F	STRINGENT	STRINGENT	STRINGENT	YES	YES	YES	YES	3'UTR	NO	3'UTR	3'UTR	Stop codon	3'UTR
AT3G18890	Q8H0U5	Tic62	AtTic62, Tic62	NAD(P)-binding Rossmann-fold superfamily protein	STRINGENT	STRINGENT	N.A.	YES	NO	NO	NO	3'UTR	3'UTR	3'UTR	3'UTR	Stop codon	3'UTR
AT3G19170	F4JA10, Q9LJL3	PREP1	ATPREP1, ATZNMP, PREP1	presequence protease 1	STRINGENT	STRINGENT	STRINGENT	YES	YES	YES	YES	3'UTR,3'UTR	3'UTR	3'UTR	3'UTR, CDS	Stop codon	3'UTR
AT3G19420	Q9LT75	2	ATPEN2, PEN2, PTEN2A	PTEN 2	STRINGENT	STRINGENT	STRINGENT	YES	NO	YES	YES	3'UTR	NO	3'UTR	3'UTR	Stop codon	NO
AT3G19440	A0A1I9LLI4, Q9LT72	AT3G19440		Pseudouridine synthase family protein	STRINGENT	STRINGENT	STRINGENT	YES	NO	YES	YES	CDS,CDS	NO	NO	NO	NO	NO
AT3G19760	Q94A52	EIF4A-III	EIF4A-III, RH2	eukaryotic initiation factor 4A-III	STRINGENT	STRINGENT	STRINGENT	YES	YES	YES	YES	3'UTR	3'UTR, CDS	3'UTR	3'UTR	3' UTR	3'UTR
AT3G19820	Q39085	DWF1	CBB1, DIM, DIM1, DWF1, EVE1	cell elongation protein / DWARF1 / DIMINUTO (DIM)	STRINGENT	STRINGENT	STRINGENT	YES	YES	YES	YES	3'UTR,3'UTR,3'UTR	NO	3'UTR	3'UTR	NO	NO
AT3G19910	A0A1I9LQ74, Q9LT17	AT3G19910		RING/U-box superfamily protein	STRINGENT	STRINGENT	STRINGENT	YES	YES	YES	YES	3'UTR	3'UTR, CDS	3'UTR	3'UTR	Stop codon	3'UTR
AT3G20000	A0A1I9LPN4, Q9LHE5	TOM40	TOM40	translocase of the outer mitochondrial membrane 40	STRINGENT	STRINGENT	STRINGENT	YES	YES	YES	YES	3'UTR,3'UTR	3'UTR	3'UTR	NO	3' UTR	3'UTR
AT3G20290	Q94CF0	EHD1	ATEHD1, EHD1	EPS15 homology domain 1	STRINGENT	STRINGENT	STRINGENT	YES	YES	YES	YES	3'UTR,3'UTR,3'UTR	3'UTR	3'UTR, CDS	3'UTR, CDS, 5'UTR	Stop codon	3'UTR
AT3G20390	A0A178VDU1, A0A1I9LS34, Q94JQ4	AT3G20390	RidA	endoribonuclease L-PSP family protein	STRINGENT	STRINGENT	STRINGENT	YES	YES	YES	YES	3'UTR,3'UTR	3'UTR	3'UTR	3'UTR	Stop codon	NO
AT3G20790	Q8RWP0	AT3G20790		NAD(P)-binding Rossmann-fold superfamily protein	STRINGENT	STRINGENT	STRINGENT	YES	YES	YES	YES	3'UTR	3'UTR	CDS, 3'UTR	3'UTR	Stop codon	3'UTR
AT3G20920	F4IWB6, Q9LIH2	AT3G20920		translocation protein-like protein	STRINGENT	STRINGENT	STRINGENT	YES	NO	YES	YES	3'UTR,3'UTR	NO	3'UTR	NO	Stop codon	3'UTR
AT3G21055	A0A1I9LS90, Q39195	PSBTN	PSBTN	photosystem II subunit T	STRINGENT	STRINGENT	N.A.	YES	NO	NO	NO	3'UTR,3'UTR	NO	3'UTR	3'UTR, CDS, 5'UTR	NO	NO
AT3G21865	Q9LSX7	PEX22	PEX22	peroxin 22	STRINGENT	STRINGENT	STRINGENT	YES	NO	YES	NO	3'UTR	NO	3'UTR	3'UTR	Stop codon	3'UTR
AT3G22110	O81148	PAC1	PAC1	20S proteasome alpha subunit C1	STRINGENT	STRINGENT	STRINGENT	YES	YES	YES	YES	3'UTR	NO	3'UTR	3'UTR, 5'UTR	NO	NO
AT3G22200	Q94CE5, Q94CE5-2	POP2	GABA-T, HER1, POP2	Pyridoxal phosphate (PLP)-dependent transferases superfamily protein	STRINGENT	STRINGENT	STRINGENT	YES	NO	YES	NO	3'UTR,3'UTR,3'UTR	NO	3'UTR	3'UTR	Stop codon	3'UTR
AT3G22230	Q8LCL3	AT3G22230		Ribosomal L27e protein family	STRINGENT	STRINGENT	STRINGENT	YES	YES	YES	YES	3'UTR	3'UTR	3'UTR	3'UTR	NO	NO
AT3G22290	Q94K91, Q9FH30	AT3G22290		Endoplasmic reticulum vesicle transporter protein	STRINGENT	STRINGENT	STRINGENT	YES	YES	YES	YES	3'UTR,3'UTR	NO	3'UTR	3'UTR	NO	3'UTR
AT3G22320	O81098	NRPB5	ATRPABC24.3, NRPB5, NRPD5, RPB5A	Eukaryotic rpb5 RNA polymerase subunit family protein	STRINGENT	STRINGENT	STRINGENT	YES	NO	YES	NO	3'UTR	3'UTR	3'UTR	3'UTR	Stop codon	3'UTR
AT3G22440	Q9LUV4	AT3G22440		FRIGIDA-like protein	STRINGENT	STRINGENT	STRINGENT	YES	NO	YES	NO	3'UTR	NO	3'UTR	3'UTR	CDS, 3' UTR	3'UTR
AT3G22850	Q9LIL3	AT3G22850		aluminum induced protein with YGL and LRDR motifs	STRINGENT	N.A.	STRINGENT	NO	NO	YES	YES	3'UTR	NO	NO	NO	Stop codon	3'UTR
AT3G22890	Q9LIK9	APS1	APS1, ATPS1	ATP sulfurylase 1	STRINGENT	STRINGENT	STRINGENT	YES	NO	YES	YES	3'UTR	3'UTR	3'UTR	3'UTR	Stop codon	NO
AT3G22960	Q9LIK0	PKP-ALPHA	PKP-ALPHA, PKP1	Pyruvate kinase family protein	STRINGENT	STRINGENT	STRINGENT	YES	YES	YES	YES	3'UTR	NO	3'UTR	3'UTR	Stop codon	3'UTR
AT3G23325	Q9LW64	AT3G23325		Splicing factor 3B subunit 5/RDS3 complex subunit 10	STRINGENT	STRINGENT	STRINGENT	YES	NO	YES	YES	3'UTR	NO	3'UTR	NO	NO	3'UTR
AT3G23390	O23290	AT3G23390	RPL36aA	Zinc-binding ribosomal protein family protein	STRINGENT	STRINGENT	STRINGENT	YES	NO	NO	YES	3'UTR	NO	3'UTR	3'UTR	Stop codon	3'UTR
AT3G23490	A0A1I9LTP8, O22683	CYN	CYN	cyanase	STRINGENT	STRINGENT	STRINGENT	YES	YES	YES	YES	3'UTR,3'UTR	NO	3'UTR	3'UTR	NO	3'UTR
AT3G23600	A0A178VG70, A0A178VHY0, F4J447, Q9LUG8	AT3G23600		alpha/beta-Hydrolases superfamily protein	STRINGENT	STRINGENT	STRINGENT	YES	YES	YES	YES	3'UTR,3'UTR	NO	3'UTR	3'UTR	Stop codon	NO
AT3G23640	A0A1I9LTS6, Q93Y12	HGL1	HGL1	heteroglycan glucosidase 1	STRINGENT	STRINGENT	STRINGENT	YES	YES	YES	YES	3'UTR,3'UTR,3'UTR	NO	3'UTR	3'UTR	Stop codon	3'UTR
AT3G23690	Q9LK48	AT3G23690	CIL2	basic helix-loop-helix (bHLH) DNA-binding superfamily protein	STRINGENT	STRINGENT	N.A.	YES	NO	NO	NO	3'UTR	3'UTR	NO	3'UTR	Stop codon	3'UTR
AT3G23700	Q9LK47	AT3G23700	SRRP1	Nucleic acid-binding proteins superfamily	STRINGENT	STRINGENT	N.A.	YES	NO	NO	NO	3'UTR	NO	3'UTR	3'UTR	Stop codon, CDS	3'UTR
AT3G23940	Q9LIR4, Q9LIR4-2	AT3G23940	DHAD	dehydratase family	STRINGENT	STRINGENT	STRINGENT	YES	YES	YES	YES	3'UTR,3'UTR	NO	3'UTR	3'UTR	coding_intron, Stop codon	3'UTR
AT3G24160	Q9ZSJ7	PMP	PMP	putative type 1 membrane protein	STRINGENT	STRINGENT	STRINGENT	YES	YES	YES	YES	CDS,3'UTR	3'UTR, StopCodon	3'UTR	3'UTR, 5'UTR	3' UTR	3'UTR
AT3G24170	P48641	GR1	ATGR1, GR1	glutathione-disulfide reductase	STRINGENT	STRINGENT	STRINGENT	YES	YES	YES	YES	3'UTR,3'UTR,3'UTR	NO	3'UTR	3'UTR	Stop codon	3'UTR
AT3G24190	Q9LRN0	AT3G24190		Protein kinase superfamily protein	STRINGENT	STRINGENT	N.A.	YES	NO	NO	NO	3'UTR	NO	3'UTR	3'UTR	Stop codon	3'UTR
AT3G24430	Q6STH5	HCF101	HCF101	ATP binding protein	STRINGENT	STRINGENT	N.A.	YES	YES	NO	NO	3'UTR	3'UTR	NO	3'UTR	Stop codon	3'UTR
AT3G24550	Q9LV48, Q9LV48-2	PERK1	ATPERK1, PERK1	proline extensin-like receptor kinase 1	STRINGENT	STRINGENT	STRINGENT	YES	NO	YES	NO	3'UTR	3'UTR	3'UTR	3'UTR	CDS, Stop codon	3'UTR
AT3G24830	Q9LRX8	AT3G24830		Ribosomal protein L13 family protein	STRINGENT	STRINGENT	STRINGENT	YES	YES	YES	YES	3'UTR	NO	3'UTR	3'UTR	NO	3'UTR
AT3G25040	Q8VWI1	ERD2B	ERD2B	endoplasmic reticulum retention defective 2B	STRINGENT	STRINGENT	STRINGENT	YES	NO	YES	YES	3'UTR	NO	3'UTR	3'UTR, 5'UTR	Stop codon	3'UTR
AT3G25220	Q38935	FKBP15-1	FKBP15-1	FK506-binding protein 15 kD-1	STRINGENT	N.A.	STRINGENT	NO	NO	YES	YES	3'UTR	NO	3'UTR	3'UTR	Stop codon	3'UTR
AT3G25230	B3H746, Q38931	ROF1	ATFKBP62, FKBP62, ROF1	rotamase FKBP 1	STRINGENT	STRINGENT	STRINGENT	YES	YES	YES	YES	3'UTR,3'UTR	NO	3'UTR	3'UTR	3' UTR	3'UTR
AT3G25520	F4J912, Q56X31, Q8LBI1	ATL5	ATL5, OLI5, PGY3, RPL5A	ribosomal protein L5	STRINGENT	STRINGENT	STRINGENT	YES	YES	YES	YES	3'UTR,3'UTR,3'UTR	NO	3'UTR	3'UTR, CDS	NO	NO
AT3G25530	A0A1I9LPQ6, Q9LSV0, Q9LSV0-2	GLYR1	ATGHBDH, AtGLYR1, GHBDH, GLYR1, GR1	glyoxylate reductase 1	STRINGENT	N.A.	STRINGENT	NO	NO	YES	NO	3'UTR,3'UTR,3'UTR	NO	3'UTR	3'UTR	Stop codon	3'UTR
AT3G25585	A0A1I9LSC4, F4JA27, O82568	AAPT2	AAPT2, ATAAPT2	aminoalcoholphosphotransferase	STRINGENT	N.A.	STRINGENT	NO	NO	YES	NO	3'UTR,3'UTR,3'UTR,3'UTR,3'UTR,3'UTR	NO	NO	NO	NO	NO
AT3G25690	A0A1I9LT48, F4JA42, Q9LI74	CHUP1	AtCHUP1, CHUP1	Hydroxyproline-rich glycoprotein family protein	STRINGENT	STRINGENT	N.A.	YES	NO	NO	NO	3'UTR,3'UTR,3'UTR,3'UTR,3'UTR,3'UTR	NO	CDS, 3'UTR	3'UTR, CDS	NO	3'UTR
AT3G25800	F4JA59, Q38950	PP2AA2	PDF1, PP2AA2, PR 65	protein phosphatase 2A subunit A2	STRINGENT	STRINGENT	STRINGENT	YES	YES	YES	YES	3'UTR,3'UTR,3'UTR	NO	3'UTR	3'UTR	Stop codon	3'UTR
AT3G25920	P25873, Q570N5	RPL15	RPL15	ribosomal protein L15	STRINGENT	STRINGENT	STRINGENT	YES	YES	YES	YES	3'UTR	NO	3'UTR	3'UTR	Stop codon	NO
AT3G26060	A0A1I9LR27, F4JBC9, Q9LU86	PRXQ	ATPRX Q, PRXQ	Thioredoxin superfamily protein	STRINGENT	STRINGENT	N.A.	YES	YES	NO	NO	3'UTR,3'UTR,3'UTR	NO	3'UTR	3'UTR	Stop codon	NO
AT3G26070	Q9LU85	AT3G26070		Plastid-lipid associated protein PAP / fibrillin family protein	STRINGENT	STRINGENT	N.A.	YES	NO	NO	NO	3'UTR	NO	3'UTR	3'UTR	Stop codon	3'UTR
AT3G26430	Q9LIN2	AT3G26430		GDSL-like Lipase/Acylhydrolase superfamily protein	STRINGENT	STRINGENT	STRINGENT	YES	NO	YES	NO	5'UTR	5'UTR	5'UTR	5'UTR	5' UTR	NO
AT3G26570	Q38954, Q38954-2	PHT2;1	ORF02, PHT2;1	phosphate transporter 2;1	STRINGENT	STRINGENT	N.A.	YES	YES	NO	NO	3'UTR,3'UTR	StartCodon, 3'UTR	3'UTR	3'UTR	NO	NO
AT3G26650	P25856, Q570E5	GAPA	GAPA, GAPA-1	glyceraldehyde 3-phosphate dehydrogenase A subunit	STRINGENT	STRINGENT	STRINGENT	YES	YES	YES	NO	CDS,3'UTR	NO	3'UTR	3'UTR, CDS, 5'UTR	NO	NO
AT3G26710	Q9LSE4	CCB1	CCB1	cofactor assembly of complex C	STRINGENT	STRINGENT	N.A.	YES	YES	NO	NO	3'UTR	3'UTR	3'UTR	3'UTR	NO	3'UTR
AT3G27090	Q9LSC7	AT3G27090		DCD (Development and Cell Death) domain protein	STRINGENT	STRINGENT	STRINGENT	YES	YES	YES	YES	3'UTR,3'UTR,3'UTR	NO	3'UTR	3'UTR	3' UTR	3'UTR
AT3G27160	A0A1I9LRJ3, Q9LI88	1	1	Ribosomal protein S21 family protein	STRINGENT	STRINGENT	N.A.	YES	NO	NO	NO	3'UTR	NO	CDS, 3'UTR	3'UTR, 5'UTR, CDS	Stop codon	NO
AT3G27240	Q9LK29	AT3G27240		Cytochrome C1 family	STRINGENT	STRINGENT	STRINGENT	YES	YES	YES	YES	3'UTR	NO	3'UTR	3'UTR	3' UTR	3'UTR
AT3G27380	C0Z371, Q8LBZ7	SDH2-1	SDH2-1	succinate dehydrogenase 2-1	STRINGENT	STRINGENT	STRINGENT	YES	NO	YES	YES	3'UTR,3'UTR	NO	3'UTR	3'UTR	3' UTR	3'UTR
AT3G27430	C0Z2Q3, F4IWI5, O23710, O23710-2	PBB1	PBB1	N-terminal nucleophile aminohydrolases (Ntn hydrolases) superfamily protein	STRINGENT	STRINGENT	STRINGENT	YES	YES	YES	YES	3'UTR,3'UTR,3'UTR	NO	3'UTR	3'UTR	Stop codon	3'UTR
AT3G27530	B0F9L4	GC6	GC6, MAG4	golgin Putative 6	STRINGENT	STRINGENT	STRINGENT	YES	NO	YES	NO	3'UTR	NO	NO	3'UTR	Stop codon	3'UTR
AT3G27740	A8MRD8, Q9LVW7	CARA	CARA, VEN6	carbamoyl phosphate synthetase A	STRINGENT	STRINGENT	STRINGENT	YES	YES	YES	YES	3'UTR,3'UTR	NO	3'UTR	3'UTR	Stop codon	3'UTR
AT3G27770	Q56W65, Q67YW5, Q8W4R6, Q9LVW5	AT3G27770		plant/protein	STRINGENT	STRINGENT	STRINGENT	YES	NO	YES	YES	3'UTR,3'UTR	3'UTR	3'UTR	3'UTR	Stop codon	3'UTR
AT3G27820	Q9LK94	MDAR4	ATMDAR4, MDAR4	monodehydroascorbate reductase 4	STRINGENT	STRINGENT	STRINGENT	YES	NO	YES	NO	3'UTR	NO	3'UTR	3'UTR	Stop codon	NO
AT3G27890	Q9LK88	NQR	NQR	NADPH:quinone oxidoreductase	STRINGENT	N.A.	STRINGENT	NO	NO	YES	NO	3'UTR	NO	3'UTR	3'UTR	Stop codon	3'UTR
AT3G28710	Q9LJI5	AT3G28710		ATPase, V0/A0 complex, subunit C/D	STRINGENT	STRINGENT	STRINGENT	YES	NO	YES	YES	3'UTR	5'UTR, CDS	3'UTR	3'UTR	3' UTR	3'UTR
AT3G28715	F4J0D8, Q9LHA4	AT3G28715		ATPase, V0/A0 complex, subunit C/D	STRINGENT	STRINGENT	STRINGENT	YES	YES	YES	YES	3'UTR,3'UTR	NO	3'UTR	3'UTR	Stop codon	3'UTR
AT3G28730	Q05153, Q05153-2	HMG	ATHMG, HMG, NFD, SSRP1	high mobility group	STRINGENT	STRINGENT	STRINGENT	YES	NO	YES	YES	3'UTR	NO	3'UTR	3'UTR	CDS, Stop codon	3'UTR
AT3G28900	Q9LJW6	AT3G28900		Ribosomal protein L34e superfamily protein	STRINGENT	STRINGENT	STRINGENT	YES	YES	YES	YES	3'UTR	NO	3'UTR	3'UTR	Stop codon	3'UTR
AT3G28940	Q9MBH2	AT3G28940		AIG2-like (avirulence induced gene) family protein	STRINGENT	STRINGENT	STRINGENT	YES	YES	YES	YES	3'UTR	3'UTR	3'UTR	3'UTR	Stop codon	NO
AT3G29320	Q9LIB2	PHS1	PHS1	Glycosyl transferase, family 35	STRINGENT	STRINGENT	STRINGENT	YES	NO	YES	NO	3'UTR	NO	NO	3'UTR	3' UTR	NO
AT3G29350	Q9ZNV8, Q9ZNV8-2	AHP2	AHP2	histidine-containing phosphotransmitter 2	STRINGENT	STRINGENT	STRINGENT	YES	NO	YES	YES	3'UTR	NO	3'UTR	3'UTR	NO	3'UTR
AT3G29360	Q9LIA8	UGD2	UGD2	UDP-glucose 6-dehydrogenase family protein	STRINGENT	N.A.	STRINGENT	NO	NO	YES	YES	3'UTR,3'UTR	NO	3'UTR	3'UTR	NO	NO
AT3G30390	Q9LI61	AT3G30390		Transmembrane amino acid transporter family protein	STRINGENT	STRINGENT	STRINGENT	YES	YES	YES	YES	CDS,CDS,CDS,3'UTR,3'UTR,3'UTR	NO	3'UTR	3'UTR	Stop codon	3'UTR
AT3G32930	Q9LHC4	AT3G32930		6,7-dimethyl-8-ribityllumazine synthase	STRINGENT	STRINGENT	N.A.	YES	NO	NO	NO	3'UTR,3'UTR	NO	3'UTR	3'UTR	Stop codon	3'UTR
AT3G42050	A0A178V9F7, Q9LX65	AT3G42050		vacuolar ATP synthase subunit H family protein	STRINGENT	STRINGENT	STRINGENT	YES	YES	YES	YES	3'UTR	NO	3'UTR	3'UTR	Stop codon	3'UTR
AT3G42150	Q9M2N7	AT3G42150		transmembrane protein	STRINGENT	STRINGENT	STRINGENT	YES	NO	YES	NO	3'UTR,3'UTR,3'UTR	NO	NO	3'UTR	NO	3'UTR
AT3G43300	F4IXW2	ATMIN7	ATMIN7, BEN1, BIG5, MIN7	HOPM interactor 7	STRINGENT	STRINGENT	STRINGENT	YES	YES	YES	YES	3'UTR,3'UTR,3'UTR	NO	3'UTR	3'UTR	Stop codon	3'UTR
AT3G43810	A0A1I9LPJ1, A0A1I9LPJ2, P59220	CAM7	AtCAM7, CAM7, ZBF3	calmodulin 7	STRINGENT	STRINGENT	STRINGENT	YES	YES	YES	YES	CDS,CDS,CDS,CDS,3'UTR,3'UTR,3'UTR	3'UTR	3'UTR	3'UTR	3' UTR	NO
AT3G43980	Q680P8	AT3G43980		Ribosomal protein S14p/S29e family protein	STRINGENT	STRINGENT	STRINGENT	YES	YES	YES	YES	3'UTR	NO	3'UTR	3'UTR	NO	3'UTR
AT3G44010	A0A178VIQ1, Q680P8	AT3G44010		Ribosomal protein S14p/S29e family protein	STRINGENT	STRINGENT	STRINGENT	YES	YES	YES	YES	3'UTR,3'UTR	NO	3'UTR	3'UTR, 5'UTR	Stop codon	3'UTR
AT3G44110	F4J1V2, Q56ZJ7, Q94AW8	J3	ATJ, ATJ3, J3	DNAJ homologue 3	STRINGENT	STRINGENT	STRINGENT	YES	YES	YES	YES	3'UTR,3'UTR	NO	3'UTR	3'UTR	Stop codon	NO
AT3G44280	A0A1I9LLD9, Q9LXM0	AT3G44280		peptidyl-prolyl cis-trans isomerase G	STRINGENT	STRINGENT	STRINGENT	YES	YES	YES	YES	3'UTR,3'UTR	NO	3'UTR	3'UTR	Stop codon	3'UTR
AT3G44340	F4J1Y2, Q9M291	CEF	CEF	hypothetical protein	STRINGENT	STRINGENT	STRINGENT	YES	NO	YES	NO	3'UTR,3'UTR,3'UTR,3'UTR,3'UTR	3'UTR	3'UTR	3'UTR	3' UTR	3'UTR
AT3G44590	Q9LXM8	AT3G44590		60S acidic ribosomal protein family	STRINGENT	STRINGENT	STRINGENT	YES	YES	YES	YES	3'UTR,3'UTR	NO	3'UTR	3'UTR	Stop codon	3'UTR
AT3G44620	F4J355, Q67YE7, Q9M1P2	AT3G44620		protein-tyrosine phosphatase	STRINGENT	STRINGENT	STRINGENT	YES	YES	YES	YES	3'UTR,3'UTR	NO	3'UTR	3'UTR	3' UTR	3'UTR
AT3G44890	P25864	RPL9	RPL9	ribosomal protein L9	STRINGENT	STRINGENT	N.A.	YES	YES	NO	NO	3'UTR	3'UTR	3'UTR	3'UTR	Stop codon	3'UTR
AT3G45030	P49200	AT3G45030		Ribosomal protein S10p/S20e family protein	STRINGENT	STRINGENT	STRINGENT	YES	YES	YES	YES	3'UTR	NO	3'UTR	3'UTR	NO	3'UTR
AT3G45050	B9DG54, Q8GWW5	AT3G45050		transmembrane protein	STRINGENT	STRINGENT	STRINGENT	YES	YES	YES	NO	3'UTR,3'UTR	NO	3'UTR	3'UTR	NO	3'UTR
AT3G45300	Q9SWG0	IVD	ATIVD, IVD, IVDH	isovaleryl-CoA-dehydrogenase	STRINGENT	STRINGENT	STRINGENT	YES	NO	YES	YES	3'UTR	3'UTR	3'UTR	3'UTR	Stop codon	NO
AT3G46000	A0A1I9LRV3, C0Z352, Q39251	ADF2	ADF2	actin depolymerizing factor 2	STRINGENT	N.A.	STRINGENT	NO	NO	YES	NO	3'UTR,3'UTR,3'UTR	NO	3'UTR	3'UTR	Stop codon	NO
AT3G46010	A8MR09, Q39250	ADF1	ADF1, atadf, ATADF1	actin depolymerizing factor 1	STRINGENT	STRINGENT	STRINGENT	YES	YES	YES	YES	3'UTR,3'UTR	NO	3'UTR	3'UTR	Stop codon	NO
AT3G46040	Q9LX88	RPS15AD	RPS15AD	ribosomal protein S15A D	STRINGENT	STRINGENT	STRINGENT	YES	YES	YES	YES	3'UTR	NO	3'UTR	3'UTR	Stop codon	3'UTR
AT3G46060	P28186	RABE1c	ARA-3, ARA3, ATRAB8A, ATRABE1C, RAB8A, RABE1c	RAB GTPase homolog 8A	STRINGENT	STRINGENT	STRINGENT	YES	YES	YES	YES	3'UTR,3'UTR,3'UTR	NO	3'UTR	3'UTR	Stop codon	3'UTR
AT3G46430	A0A384KW84	AT3G46430		ATP synthase	STRINGENT	STRINGENT	STRINGENT	YES	YES	YES	YES	3'UTR	NO	3'UTR	3'UTR	NO	3'UTR
AT3G46560	A0A178VB86, Q9XGX9	TIM9	AtTIM9, emb2474, TIM9	Tim10/DDP family zinc finger protein	STRINGENT	STRINGENT	STRINGENT	YES	YES	YES	YES	3'UTR	NO	3'UTR	3'UTR	Stop codon	3'UTR
AT3G46780	Q9STF2, Q9STF2-2	PTAC16	PTAC16	plastid transcriptionally active 16	STRINGENT	STRINGENT	N.A.	YES	YES	NO	NO	3'UTR	NO	3'UTR	3'UTR, 5'UTR	NO	NO
AT3G47370	Q9STY6	AT3G47370		Ribosomal protein S10p/S20e family protein	STRINGENT	STRINGENT	STRINGENT	YES	YES	YES	YES	3'UTR,3'UTR,3'UTR	3'UTR	3'UTR	3'UTR	NO	3'UTR
AT3G47470	P27521, Q9FPI3	LHCA4	CAB4, LHCA4	light-harvesting chlorophyll-protein complex I subunit A4	STRINGENT	STRINGENT	STRINGENT	YES	YES	YES	YES	3'UTR	NO	3'UTR	3'UTR, 5'UTR, CDS	NO	NO
AT3G47650	Q9SN73	AT3G47650	BDS2	DnaJ/Hsp40 cysteine-rich domain superfamily protein	STRINGENT	STRINGENT	STRINGENT	YES	YES	YES	YES	3'UTR	NO	3'UTR	3'UTR, 5'UTR	Stop codon	NO
AT3G47810	Q9STT2	MAG1	ATVPS29, MAG1, VPS29	Calcineurin-like metallo-phosphoesterase superfamily protein	STRINGENT	STRINGENT	STRINGENT	YES	YES	YES	YES	3'UTR,3'UTR,3'UTR	StopCodon, 3'UTR	3'UTR	3'UTR	Stop codon	3'UTR
AT3G47833	Q9C5E8	SDH7	SDH7, SDH7A	succinate dehydrogenase subunit	STRINGENT	STRINGENT	STRINGENT	YES	YES	YES	YES	3'UTR	NO	3'UTR	3'UTR	Stop codon	3'UTR
AT3G47836	A8MSE4, Q3EAN0	AT3G47836		transmembrane protein	STRINGENT	STRINGENT	STRINGENT	YES	YES	YES	YES	CDS,CDS,3'UTR,3'UTR	NO	3'UTR	3'UTR, CDS	NO	3'UTR
AT3G47890	F4JCR1	AT3G47890		Ubiquitin carboxyl-terminal hydrolase-related protein	STRINGENT	STRINGENT	STRINGENT	YES	NO	YES	NO	5'UTR,5'UTR	NO	NO	NO	Stop codon	NO
AT3G48000	A0A178VKH7, Q9SU63	ALDH2B4	ALDH2, ALDH2A, ALDH2B4	aldehyde dehydrogenase 2B4	STRINGENT	STRINGENT	STRINGENT	YES	NO	YES	YES	3'UTR	NO	3'UTR	3'UTR	Stop codon	NO
AT3G48030	A0A178V9E1, A0A1I9LNQ5, Q7X843, Q7X843-2, Q7X843-3	AT3G48030	AtHIGD1	hypoxia-responsive family protein / zinc finger (C3HC4-type RING finger) family protein	STRINGENT	STRINGENT	STRINGENT	YES	YES	YES	YES	5'UTR	NO	NO	NO	NO	5'UTR
AT3G48110	Q8L785, Q8L785-2	EDD1	EDD, EDD1	glycine-tRNA ligase	STRINGENT	STRINGENT	N.A.	YES	NO	NO	NO	3'UTR	NO	3'UTR	3'UTR, CDS	Stop codon	3'UTR
AT3G48140	Q42338	AT3G48140		B12D protein	STRINGENT	STRINGENT	STRINGENT	YES	YES	YES	YES	3'UTR	3'UTR	3'UTR	3'UTR, 5'UTR	Stop codon	NO
AT3G48560	P17597	CSR1	AHAS, ALS, CSR1, IMR1, TZP5	chlorsulfuron/imidazolinone resistant 1	STRINGENT	STRINGENT	N.A.	YES	NO	NO	NO	3'UTR	CDS, 3'UTR, StopCodon	3'UTR	3'UTR	CDS	NO
AT3G48730	Q42522	GSA2	GSA2, GSAM	glutamate-1-semialdehyde 2,1-aminomutase 2	STRINGENT	STRINGENT	N.A.	YES	YES	NO	NO	3'UTR	NO	3'UTR	3'UTR	Stop codon	NO
AT3G48870	F4JF64, Q9SXJ7	HSP93-III	ATCLPC, ATHSP93-III, ClpC2, HSP93-III	Clp ATPase	STRINGENT	STRINGENT	STRINGENT	YES	YES	YES	YES	3'UTR,3'UTR,3'UTR,3'UTR	NO	3'UTR	3'UTR	Stop codon	3'UTR
AT3G48890	Q9M2Z4	MAPR3	ATMAPR3, ATMP2, MAPR3, MSBP2	membrane-associated progesterone binding protein 3	STRINGENT	STRINGENT	STRINGENT	YES	YES	YES	YES	3'UTR	NO	3'UTR	3'UTR	Stop codon	3'UTR
AT3G48930	P16181	EMB1080	EMB1080	Nucleic acid-binding, OB-fold-like protein	STRINGENT	STRINGENT	STRINGENT	YES	YES	YES	YES	3'UTR	NO	3'UTR	3'UTR, 5'UTR	Stop codon	NO
AT3G49010	A8MQA1, F4IWP7, P41127	BBC1	ATBBC1, BBC1, RSU2	breast basic conserved 1	STRINGENT	STRINGENT	STRINGENT	YES	YES	YES	YES	3'UTR,3'UTR,3'UTR,3'UTR,3'UTR,3'UTR,3'UTR	NO	3'UTR	3'UTR, 5'UTR	Stop codon	NO
AT3G49430	A0A178VIL8, A2RVS6, A2RVS6-2	SR34a	At-SR34a, SR34a, SRp34a	SER/ARG-rich protein 34A	STRINGENT	STRINGENT	STRINGENT	YES	YES	YES	YES	3'UTR,3'UTR,3'UTR,3'UTR,3'UTR,3'UTR	3'UTR	3'UTR	3'UTR	CDS, Stop codon	3'UTR
AT3G49470	A0A1I9LR04, Q94JX9	NACA2	NACA2	nascent polypeptide-associated complex subunit alpha-like protein 2	STRINGENT	STRINGENT	STRINGENT	YES	YES	YES	YES	3'UTR	NO	3'UTR	3'UTR	Stop codon	NO
AT3G49910	P51414	AT3G49910		Translation protein SH3-like family protein	STRINGENT	STRINGENT	STRINGENT	YES	YES	YES	YES	3'UTR	NO	3'UTR	3'UTR, 5'UTR	NO	NO
AT3G50000	Q08466, Q08466-2	CKA2	ATCKA2, CKA2	casein kinase II, alpha chain 2	STRINGENT	STRINGENT	STRINGENT	YES	YES	YES	YES	3'UTR	3'UTR	3'UTR	3'UTR	Stop codon	3'UTR
AT3G50500	F4J0N1, Q39192	SNRK2.2	SNRK2-2, SNRK2.2, SPK-2-2, SRK2D	SNF1-related protein kinase 2.2	STRINGENT	STRINGENT	STRINGENT	YES	YES	YES	YES	3'UTR,3'UTR	NO	3'UTR	3'UTR	NO	3'UTR
AT3G50820	Q9S841	PSBO2	OEC33, PSBO-2, PSBO2	photosystem II subunit O-2	STRINGENT	STRINGENT	N.A.	YES	NO	NO	NO	3'UTR	3'UTR	3'UTR	3'UTR, CDS, 5'UTR	NO	NO
AT3G51140	A0A1I9LRK5, Q94C78	AT3G51140		DnaJ (DUF3353)	STRINGENT	STRINGENT	STRINGENT	YES	YES	YES	YES	3'UTR,3'UTR	3'UTR	3'UTR	3'UTR	Stop codon	3'UTR
AT3G51260	P30186, Q2V3Q0	PAD1	PAD1	20S proteasome alpha subunit PAD1	STRINGENT	STRINGENT	STRINGENT	YES	YES	YES	YES	3'UTR,3'UTR	NO	3'UTR	3'UTR	Stop codon	3'UTR
AT3G51370	Q9SD12, Q9SD12-2	AT3G51370		Protein phosphatase 2C family protein	STRINGENT	STRINGENT	STRINGENT	YES	NO	YES	NO	3'UTR,3'UTR,3'UTR	5'UTR	3'UTR	3'UTR	Stop codon	3'UTR
AT3G51460	Q9C5G5	4	4	Phosphoinositide phosphatase family protein	STRINGENT	STRINGENT	STRINGENT	YES	NO	YES	YES	3'UTR	NO	3'UTR	3'UTR	Stop codon	3'UTR
AT3G51510	Q9SCZ8	AT3G51510		transmembrane protein	STRINGENT	STRINGENT	N.A.	YES	NO	NO	NO	3'UTR	3'UTR	3'UTR	3'UTR	Stop codon	NO
AT3G51610	Q8L776, Q8L914, Q9XFS8	NPU	NPU	ATP-dependent helicase/deoxyribonuclease subunit B	STRINGENT	STRINGENT	STRINGENT	YES	YES	YES	YES	3'UTR	3'UTR	3'UTR	3'UTR	Stop codon	3'UTR
AT3G51730	Q9SCT5	AT3G51730		saposin B domain-containing protein	STRINGENT	N.A.	STRINGENT	NO	NO	YES	NO	3'UTR	NO	3'UTR	3'UTR, 5'UTR	3' UTR	3'UTR
AT3G51800	Q96327, Q96327-2, Q96327-3, Q96327-4	ATG2	ATEBP1, ATG2, EBP1, G2p	metallopeptidase M24 family protein	STRINGENT	STRINGENT	STRINGENT	YES	NO	YES	YES	3'UTR,3'UTR	NO	3'UTR	3'UTR	Stop codon	3'UTR
AT3G51820	Q38833	G4	ATG4, CHLG, G4, PDE325	UbiA prenyltransferase family protein	STRINGENT	STRINGENT	N.A.	YES	YES	NO	NO	3'UTR	NO	3'UTR	3'UTR	Stop codon	3'UTR
AT3G51840	A0A178V7J5, Q56WB3, Q96329	ACX4	ACX4, ATG6, ATSCX	acyl-CoA oxidase 4	STRINGENT	STRINGENT	STRINGENT	YES	YES	YES	YES	3'UTR	3'UTR	3'UTR, CDS	3'UTR	Stop codon	3'UTR
AT3G51880	F4J5M5, O49595, O49595-2	HMGB1	AtHMGB1, HMGB1, NFD1	high mobility group B1	STRINGENT	STRINGENT	STRINGENT	YES	NO	YES	NO	3'UTR,3'UTR,3'UTR,3'UTR,3'UTR	5'UTR	3'UTR	3'UTR	Stop codon	3'UTR
AT3G52090	F4J5R0, Q38859	NRPB11	ATRPB13.6, NRPB11, NRPD11, NRPE11	DNA-directed RNA polymerase, RBP11-like protein	STRINGENT	STRINGENT	STRINGENT	YES	YES	YES	YES	3'UTR,3'UTR	NO	3'UTR	3'UTR	Stop codon	3'UTR
AT3G52140	A0A178VKH1, F4J5R9, F4J5S0, F4J5S1, F4J5S1-2	NOXY38	FMT, FRIENDLY, NOXY38	tetratricopeptide repeat (TPR)-containing protein	STRINGENT	STRINGENT	STRINGENT	YES	NO	YES	YES	3'UTR,3'UTR,3'UTR,3'UTR,3'UTR,3'UTR	3'UTR	3'UTR	3'UTR, 5'UTR	Stop codon	NO
AT3G52150	Q8VYM4	PSRP2	PSRP2	RNA-binding (RRM/RBD/RNP motifs) family protein	STRINGENT	STRINGENT	N.A.	YES	YES	NO	NO	3'UTR	NO	3'UTR	3'UTR, 5'UTR	3' UTR	NO
AT3G52200	A0A178VIR0, F4J5T2, Q0WQF7	LTA3	LTA3, mtE2-1	Dihydrolipoamide acetyltransferase, long form protein	STRINGENT	STRINGENT	STRINGENT	YES	YES	YES	YES	3'UTR,3'UTR	NO	NO	3'UTR	3' UTR	3'UTR
AT3G52300	Q2V3P9, Q9FT52	ATPQ	ATPQ	ATP synthase D chain	STRINGENT	STRINGENT	STRINGENT	YES	YES	YES	YES	3'UTR,3'UTR	NO	3'UTR	3'UTR	Stop codon	NO
AT3G52380	Q39061	CP33	CP33, PDE322	chloroplast RNA-binding protein 33	STRINGENT	STRINGENT	N.A.	YES	YES	NO	NO	3'UTR	NO	3'UTR	3'UTR	NO	NO
AT3G52560	A0A178VKZ7, F4J6Z1, Q9SVD7, Q9SVD7-2, Q9SVD7-3	UEV1D-4	MMZ4, UEV1D, UEV1D-4	ubiquitin E2 variant 1D-4	STRINGENT	STRINGENT	STRINGENT	YES	YES	YES	YES	3'UTR,3'UTR,3'UTR,3'UTR	NO	3'UTR	3'UTR	3' UTR	3'UTR
AT3G52580	A0A178V9V2, P42036	AT3G52580		Ribosomal protein S11 family protein	STRINGENT	STRINGENT	STRINGENT	YES	YES	YES	YES	3'UTR	NO	3'UTR	3'UTR	NO	3'UTR
AT3G52590	B9DHA6	UBQ1	EMB2167, ERD16, HAP4, UBQ1	ubiquitin extension protein 1	STRINGENT	STRINGENT	STRINGENT	YES	YES	YES	YES	CDS,3'UTR	NO	3'UTR	3'UTR	Stop codon	NO
AT3G52640	F4J819, F4J820, Q8GUM5	AT3G52640	NCT	Zn-dependent exopeptidases superfamily protein	STRINGENT	STRINGENT	STRINGENT	YES	YES	YES	YES	3'UTR,3'UTR,3'UTR	NO	NO	NO	Stop codon	3'UTR
AT3G52730	A0A1I9LS87, Q9LXJ2	AT3G52730		ubiquinol-cytochrome C reductase UQCRX/QCR9-like family protein	STRINGENT	STRINGENT	STRINGENT	YES	YES	YES	YES	3'UTR,3'UTR	NO	3'UTR	3'UTR	Stop codon	3'UTR
AT3G52850	A0A178VKB9, P93026	VSR1	ATELP, ATELP1, ATVSR1, BP-80, BP80, BP80-1;1, BP80B, GFS1, VSR1, VSR1;1	vacuolar sorting receptor homolog 1	STRINGENT	STRINGENT	STRINGENT	YES	YES	YES	YES	3'UTR	NO	3'UTR	3'UTR	Stop codon	3'UTR
AT3G52880	F4J849, Q9LFA3	MDAR1	ATMDAR1, MDAR1	monodehydroascorbate reductase 1	STRINGENT	STRINGENT	STRINGENT	YES	YES	YES	YES	3'UTR,3'UTR	NO	3'UTR	3'UTR	Stop codon	NO
AT3G52930	Q9LF98	FBA8	AtFBA8, FBA8	Aldolase superfamily protein	STRINGENT	STRINGENT	STRINGENT	YES	YES	YES	YES	CDS,3'UTR	NO	3'UTR	3'UTR	NO	NO
AT3G52960	Q949U7	AT3G52960	PrxIIE	Thioredoxin superfamily protein	STRINGENT	STRINGENT	N.A.	YES	YES	NO	NO	3'UTR	NO	3'UTR	3'UTR	CDS	NO
AT3G52990	A8MR07, Q94KE3, Q9LF93	AT3G52990		Pyruvate kinase family protein	STRINGENT	STRINGENT	STRINGENT	YES	NO	YES	YES	3'UTR,3'UTR	NO	3'UTR	3'UTR	Stop codon	3'UTR
AT3G53020	A0A178V6R7, P38666	STV1	RPL24, RPL24B, STV1	Ribosomal protein L24e family protein	STRINGENT	STRINGENT	STRINGENT	YES	YES	YES	YES	3'UTR	NO	3'UTR	3'UTR	Stop codon	NO
AT3G53430	Q9LFH5	AT3G53430	uL11B	Ribosomal protein L11 family protein	STRINGENT	STRINGENT	STRINGENT	YES	YES	YES	YES	CDS,3'UTR	NO	3'UTR	3'UTR, 5'UTR	NO	NO
AT3G53460	F4JAF3, Q43349, Q43349-2	CP29	CP29	chloroplast RNA-binding protein 29	STRINGENT	STRINGENT	STRINGENT	YES	YES	YES	YES	3'UTR,3'UTR,3'UTR	NO	3'UTR	3'UTR	3' UTR, CDS	NO
AT3G53500	A0A178V7R7, Q9FYB7, Q9FYB7-2	RS2Z32	At-RS2Z, RS2Z32, RSZ32	RNA-binding (RRM/RBD/RNP motifs) family protein with retrovirus zinc finger-like domain-containing protein	STRINGENT	STRINGENT	STRINGENT	YES	YES	YES	YES	3'UTR,3'UTR,3'UTR	NO	3'UTR	3'UTR	Stop codon	3'UTR
AT3G53580	Q9LFG2	AT3G53580		diaminopimelate epimerase family protein	STRINGENT	STRINGENT	STRINGENT	YES	YES	YES	YES	3'UTR	NO	3'UTR	3'UTR	Stop codon	3'UTR
AT3G53740	Q9M352, Q9M352-2	AT3G53740		Ribosomal protein L36e family protein	STRINGENT	STRINGENT	STRINGENT	YES	YES	YES	YES	3'UTR,3'UTR,3'UTR,3'UTR	NO	3'UTR	3'UTR	Stop codon	NO
AT3G53870	Q9M339	AT3G53870		Ribosomal protein S3 family protein	STRINGENT	STRINGENT	STRINGENT	YES	YES	YES	YES	3'UTR	NO	3'UTR	3'UTR, CDS	Stop codon	NO
AT3G53890	A0A178VHY5, Q9M337	AT3G53890	EVR1, RPS21B	Ribosomal protein S21e	STRINGENT	STRINGENT	STRINGENT	YES	YES	YES	YES	3'UTR,3'UTR	3'UTR	3'UTR	3'UTR	NO	NO
AT3G53990	Q8LC99, Q9M328	AT3G53990	AtUSP	Adenine nucleotide alpha hydrolases-like superfamily protein	STRINGENT	STRINGENT	STRINGENT	YES	YES	YES	YES	3'UTR,3'UTR	NO	3'UTR	3'UTR	NO	3'UTR
AT3G54050	P25851	HCEF1	cfbp1, HCEF1	high cyclic electron flow 1	STRINGENT	STRINGENT	N.A.	YES	NO	NO	NO	3'UTR,3'UTR,3'UTR	NO	3'UTR	3'UTR, 5'UTR	Stop codon	NO
AT3G54110	O81845	PUMP1	ATPUMP1, ATUCP1, PUMP1, UCP, UCP1	plant uncoupling mitochondrial protein 1	STRINGENT	STRINGENT	STRINGENT	YES	NO	YES	YES	3'UTR	NO	3'UTR	3'UTR	Stop codon	3'UTR
AT3G54210	Q9M385	AT3G54210	PRPL17	Ribosomal protein L17 family protein	STRINGENT	STRINGENT	N.A.	YES	YES	NO	NO	3'UTR	NO	3'UTR	3'UTR, 5'UTR	CDS	NO
AT3G54360	Q9M2V1	AT3G54360	NCA1	zinc ion binding protein	STRINGENT	STRINGENT	STRINGENT	YES	YES	YES	YES	3'UTR	3'UTR	3'UTR	3'UTR	Stop codon	3'UTR
AT3G54500	A0A2H1ZEK6, A0A2H1ZEL2, F4JCX9, F4JCX9-2, F4JCX9-3, F4JCX9-4, F4JCX9-5, Q8GZ93	AT3G54500	LNK2	agglutinin-like protein	STRINGENT	STRINGENT	N.A.	YES	NO	NO	NO	3'UTR,3'UTR	NO	3'UTR	3'UTR	3' UTR	3'UTR
AT3G54620	A0A178V7W9, A0A178V994, Q9M1G6, Q9M1G6-2, Q9M1G6-3	BZIP25	ATBZIP25, BZIP25, BZO2H4	basic leucine zipper 25	STRINGENT	N.A.	STRINGENT	NO	NO	YES	NO	3'UTR,3'UTR,3'UTR	NO	3'UTR	3'UTR	Stop codon	NO
AT3G54660	P42770	GR	ATGR2, EMB2360, GR	glutathione reductase	STRINGENT	STRINGENT	STRINGENT	YES	YES	YES	YES	3'UTR	3'UTR	3'UTR	3'UTR	3' UTR	3'UTR
AT3G54830	A0A178V6Y6	AT3G54830		Transmembrane amino acid transporter family protein	STRINGENT	STRINGENT	N.A.	YES	NO	NO	NO	CDS,CDS	NO	NO	NO	NO	NO
AT3G54880	Q9SV37	AT3G54880		zinc finger protein	STRINGENT	STRINGENT	STRINGENT	YES	YES	YES	YES	3'UTR	3'UTR	NO	3'UTR	NO	NO
AT3G54890	A8MS75, F4JE43, F4JE46, Q01667	LHCA1	LHCA1	chlorophyll a-b binding protein 6	STRINGENT	STRINGENT	STRINGENT	YES	YES	YES	YES	3'UTR,3'UTR,3'UTR,3'UTR	NO	3'UTR	3'UTR, 5'UTR, CDS	NO	NO
AT3G55040	Q9M2W2	GSTL2	GSTL2	glutathione transferase lambda 2	STRINGENT	STRINGENT	N.A.	YES	YES	NO	NO	3'UTR	NO	3'UTR	3'UTR	NO	3'UTR
AT3G55170	A0A1I9LSB4, Q9M3D2	AT3G55170		Ribosomal L29 family protein	STRINGENT	STRINGENT	STRINGENT	YES	YES	YES	YES	3'UTR,3'UTR,3'UTR,3'UTR,3'UTR	NO	3'UTR	3'UTR	NO	3'UTR
AT3G55260	A7WM73	HEXO1	ATHEX2, HEXO1	beta-hexosaminidase 1	STRINGENT	N.A.	STRINGENT	NO	NO	YES	NO	3'UTR	NO	3'UTR	3'UTR	Stop codon	3'UTR
AT3G55280	A8MS83, Q9M3C3	RPL23AB	RPL23A2, RPL23AB	ribosomal protein L23AB	STRINGENT	STRINGENT	STRINGENT	YES	YES	YES	YES	3'UTR,3'UTR,3'UTR	NO	3'UTR	3'UTR	NO	3'UTR
AT3G55330	P82538	PPL1	PPL1	PsbP-like protein 1	STRINGENT	STRINGENT	N.A.	YES	NO	NO	NO	3'UTR	3'UTR	3'UTR	3'UTR	Stop codon	3'UTR
AT3G55410	F4IWV2, Q56WF9	AT3G55410		2-oxoglutarate dehydrogenase, E1 component	STRINGENT	STRINGENT	STRINGENT	YES	YES	YES	YES	3'UTR,3'UTR	3'UTR	3'UTR	3'UTR	Stop codon	3'UTR
AT3G55440	P48491	TPI	ATCTIMC, CYTOTPI, TPI	triosephosphate isomerase	STRINGENT	STRINGENT	STRINGENT	YES	YES	YES	YES	3'UTR	NO	3'UTR	3'UTR	Stop codon	NO
AT3G55460	A0A178VM76, Q8L3X8	SCL30	At-SCL30, SCL30	SC35-like splicing factor 30	STRINGENT	STRINGENT	STRINGENT	YES	YES	YES	YES	3'UTR	NO	3'UTR	3'UTR	Stop codon	3'UTR
AT3G55620	Q9M060	eIF6A	eIF6A, emb1624	Translation initiation factor IF6	STRINGENT	STRINGENT	STRINGENT	YES	YES	YES	YES	3'UTR	NO	3'UTR	3'UTR	Stop codon	3'UTR
AT3G55750	P51422	AT3G55750		Ribosomal protein L35Ae family protein	STRINGENT	STRINGENT	STRINGENT	YES	YES	YES	YES	3'UTR	NO	3'UTR	3'UTR	Stop codon	3'UTR
AT3G55770	A0A2H1ZEK8, C0Z362, F4IY33, Q94JX2, Q9M047, Q9M047-2	WLIM2b	WLIM2b	GATA type zinc finger transcription factor family protein	STRINGENT	STRINGENT	STRINGENT	YES	YES	YES	YES	3'UTR,3'UTR,3'UTR,3'UTR,3'UTR,3'UTR,3'UTR,3'UTR,3'UTR,3'UTR,3'UTR,3'UTR,3'UTR	NO	3'UTR	3'UTR	Stop codon	3'UTR
AT3G55800	P46283	SBPASE	SBPASE	sedoheptulose-bisphosphatase	STRINGENT	STRINGENT	N.A.	YES	YES	NO	NO	3'UTR	NO	3'UTR	3'UTR, 5'UTR, CDS	Stop codon	NO
AT3G56010	Q9LY44	AT3G56010		transmembrane protein	STRINGENT	STRINGENT	N.A.	YES	NO	NO	NO	3'UTR	NO	3'UTR	3'UTR	3' UTR	NO
AT3G56020	P62120	AT3G56020		Ribosomal protein L41 family	STRINGENT	STRINGENT	STRINGENT	YES	YES	YES	YES	3'UTR	NO	3'UTR	3'UTR	Stop codon	3'UTR
AT3G56130	A0A1I9LT30, B9DFB7, F4IY75, F4IY77, Q93W03	AT3G56130	BADC1, BLP3	biotin/lipoyl attachment domain-containing protein	STRINGENT	STRINGENT	STRINGENT	YES	YES	YES	YES	3'UTR,3'UTR,3'UTR,3'UTR,3'UTR	NO	3'UTR	3'UTR	3' UTR	NO
AT3G56150	O49160	EIF3C	ATEIF3C-1, ATTIF3C1, EIF3C, EIF3C-1, TIF3C1	eukaryotic translation initiation factor 3C	STRINGENT	STRINGENT	STRINGENT	YES	NO	YES	YES	3'UTR,3'UTR	3'UTR	3'UTR	3'UTR	NO	NO
AT3G56190	F4IZC8, Q9SPE6	ALPHA-SNAP2	ALPHA-SNAP2, ASNAP	alpha-soluble NSF attachment protein 2	STRINGENT	STRINGENT	STRINGENT	YES	YES	YES	YES	3'UTR,3'UTR	NO	3'UTR	3'UTR	3' UTR, Stop codon	3'UTR
AT3G56310	Q8VXZ7, Q8VXZ7-2	AT3G56310	AGAL3	Melibiase family protein	STRINGENT	N.A.	STRINGENT	NO	NO	YES	YES	3'UTR,3'UTR	CDS	CDS, 3'UTR	3'UTR	Stop codon	3'UTR
AT3G56340	Q9LYK9	AT3G56340	RPS26e	Ribosomal protein S26e family protein	STRINGENT	STRINGENT	STRINGENT	YES	YES	YES	YES	3'UTR	NO	3'UTR	3'UTR	Stop codon	3'UTR
AT3G56490	Q8GUN2	HIT3	HINT1, HIT3	HIS triad family protein 3	STRINGENT	STRINGENT	STRINGENT	YES	YES	YES	YES	3'UTR	NO	3'UTR	3'UTR	Stop codon	3'UTR
AT3G56680	Q9LET8	AT3G56680		Single-stranded nucleic acid binding R3H protein	STRINGENT	STRINGENT	STRINGENT	YES	YES	YES	YES	3'UTR	5'UTR	NO	3'UTR	Stop codon	3'UTR
AT3G56800	Q682T9	CAM3	ACAM-3, CAM3	calmodulin 3	STRINGENT	STRINGENT	STRINGENT	YES	YES	YES	YES	3'UTR	NO	3'UTR	3'UTR	Stop codon	NO
AT3G56910	Q9LER7	PSRP5	PSRP5	plastid-specific 50S ribosomal protein 5	STRINGENT	STRINGENT	N.A.	YES	YES	NO	NO	3'UTR	3'UTR	3'UTR	3'UTR, CDS, 5'UTR	NO	NO
AT3G56940	F4J0U9, Q9M591	CRD1	ACSF, CHL27, CRD1	dicarboxylate diiron protein, putative (Crd1)	STRINGENT	STRINGENT	N.A.	YES	NO	NO	NO	3'UTR,3'UTR	StartCodon	3'UTR	3'UTR, CDS	CDS	NO
AT3G57090	Q9M1J1	BIGYIN	BIGYIN, FIS1A	Tetratricopeptide repeat (TPR)-like superfamily protein	STRINGENT	STRINGENT	STRINGENT	YES	NO	YES	YES	3'UTR	3'UTR	3'UTR	3'UTR	NO	3'UTR
AT3G57280	Q93V66	AT3G57280	AtFAX1, FAX1	Transmembrane proteins 14C	STRINGENT	STRINGENT	STRINGENT	YES	NO	YES	YES	3'UTR	NO	3'UTR	3'UTR	Stop codon	3'UTR
AT3G57290	Q9C5Z3	EIF3E	ATEIF3E-1, ATINT6, EIF3E, INT-6, INT6, TIF3E1	eukaryotic translation initiation factor 3E	STRINGENT	STRINGENT	STRINGENT	YES	YES	YES	YES	3'UTR	NO	3'UTR	3'UTR	Stop codon	NO
AT3G57320	A8MQN7, Q9M2L5	AT3G57320		threonine-tRNA ligase 2	STRINGENT	STRINGENT	STRINGENT	YES	NO	YES	YES	3'UTR	3'UTR	NO	NO	NO	3'UTR
AT3G57410	A0A1I9LLV6, A0A1I9LLW3, O81645, Q8RWJ0	VLN3	ATVLN3, VLN3	villin 3	STRINGENT	STRINGENT	STRINGENT	YES	YES	YES	YES	3'UTR,3'UTR,3'UTR,3'UTR,3'UTR,3'UTR,3'UTR,3'UTR,3'UTR	3'UTR	3'UTR	3'UTR	3' UTR, coding_intron	3'UTR
AT3G57610	A0A178VBJ3, A0A178VIV3, Q96529	ADSS	ADSS	adenylosuccinate synthase	STRINGENT	STRINGENT	STRINGENT	YES	NO	YES	NO	3'UTR	NO	3'UTR	3'UTR	Stop codon	NO
AT3G57650	A0A178V7U2, Q8LG50	LPAT2	LPAT2	lysophosphatidyl acyltransferase 2	STRINGENT	STRINGENT	STRINGENT	YES	YES	YES	YES	3'UTR	3'UTR	3'UTR	3'UTR	Stop codon	3'UTR
AT3G57785	Q8L3S7, Q9SVZ3	AT3G57785		ESSS subunit of NADH:ubiquinone oxidoreductase (complex I) protein	STRINGENT	N.A.	STRINGENT	NO	NO	YES	NO	3'UTR	NO	NO	3'UTR	3' UTR	NO
AT3G57870	Q42551	SCE1	AHUS5, ATSCE1, EMB1637, SCE1, SCE1A	sumo conjugation enzyme 1	STRINGENT	STRINGENT	STRINGENT	YES	YES	YES	YES	3'UTR	NO	3'UTR	3'UTR	Stop codon	NO
AT3G57890	F4J4K6, Q940S9	AT3G57890		Tubulin binding cofactor C domain-containing protein	STRINGENT	STRINGENT	STRINGENT	YES	NO	YES	YES	3'UTR,3'UTR,3'UTR	3'UTR	3'UTR	3'UTR	3' UTR	3'UTR
AT3G58140	Q94K73	AT3G58140		phenylalanyl-tRNA synthetase class IIc family protein	STRINGENT	STRINGENT	N.A.	YES	NO	NO	NO	3'UTR	NO	3'UTR	3'UTR	3' UTR, Stop codon	3'UTR
AT3G58460	F4J5V3, Q8LB17, Q8LB17-2	RBL15	ATRBL11, ATRBL15, RBL11, RBL15	RHOMBOID-like protein 15	STRINGENT	STRINGENT	STRINGENT	YES	NO	YES	YES	3'UTR,3'UTR	3'UTR	3'UTR	3'UTR	NO	3'UTR
AT3G58500	P48578	PP2A-4	PP2A-4	protein phosphatase 2A-4	STRINGENT	STRINGENT	STRINGENT	YES	YES	YES	YES	3'UTR	5'UTR	3'UTR	3'UTR	3' UTR	NO
AT3G58560	Q8W0Z9	AT3G58560	AtCCR4a	DNAse I-like superfamily protein	STRINGENT	STRINGENT	STRINGENT	YES	NO	YES	NO	3'UTR	3'UTR	3'UTR	3'UTR	NO	3'UTR
AT3G58580	Q9M2F8	AT3G58580	AtCCR4b	DNAse I-like superfamily protein	STRINGENT	STRINGENT	STRINGENT	YES	YES	YES	YES	3'UTR	NO	3'UTR	NO	Stop codon	3'UTR
AT3G58610	Q05758, Q56WU3	AT3G58610		ketol-acid reductoisomerase	STRINGENT	STRINGENT	STRINGENT	YES	YES	YES	YES	3'UTR,3'UTR,3'UTR,3'UTR,3'UTR	NO	3'UTR	3'UTR, CDS	CDS, Stop codon	NO
AT3G58680	Q9LXT3	MBF1B	ATMBF1B, MBF1B	multiprotein bridging factor 1B	STRINGENT	STRINGENT	STRINGENT	YES	YES	YES	YES	3'UTR	NO	3'UTR	3'UTR, 5'UTR	3' UTR	3'UTR
AT3G58730	Q9XGM1	AT3G58730		vacuolar ATP synthase subunit D (VATD) / V-ATPase D subunit / vacuolar proton pump D subunit (VATPD)	STRINGENT	STRINGENT	STRINGENT	YES	YES	YES	YES	3'UTR	NO	3'UTR	3'UTR	NO	NO
AT3G59020	F4J737, F4J738	AT3G59020		ARM repeat superfamily protein	STRINGENT	STRINGENT	STRINGENT	YES	YES	YES	YES	3'UTR,3'UTR	NO	3'UTR	3'UTR	3' UTR	3'UTR
AT3G59280	A0A178VLX7, A0A1I9LTR7, Q93VV9	TXR1	AtPAM16, MUSE5, PAM16, TXR1	Protein Transporter, Pam16	STRINGENT	N.A.	STRINGENT	NO	NO	YES	NO	3'UTR	NO	3'UTR	NO	Stop codon	3'UTR, CDS
AT3G59540	O22860	AT3G59540		Ribosomal L38e protein family	STRINGENT	STRINGENT	STRINGENT	YES	YES	YES	YES	3'UTR	NO	3'UTR	3'UTR	Stop codon	3'UTR
AT3G59600	A0A178VIS0, Q9M1A8	NRPB8B	NRPB8B, NRPD8B, NRPE8B	RNA polymerase Rpb8	STRINGENT	STRINGENT	STRINGENT	YES	YES	YES	YES	3'UTR	3'UTR	3'UTR	3'UTR	Stop codon	3'UTR
AT3G59780	F4J9G2	AT3G59780		Rhodanese/Cell cycle control phosphatase superfamily protein	STRINGENT	STRINGENT	N.A.	YES	NO	NO	NO	3'UTR	NO	5'UTR, 3'UTR	3'UTR	Stop codon	NO
AT3G59810	Q9M1Z3	LSM6A	LSM6A	Small nuclear ribonucleoprotein family protein	STRINGENT	STRINGENT	STRINGENT	YES	YES	YES	YES	3'UTR,3'UTR,3'UTR	3'UTR	3'UTR	3'UTR	Stop codon	3'UTR
AT3G59920	A0A178VGY2, O24653	GDI2	ATGDI2, GDI2	RAB GDP dissociation inhibitor 2	STRINGENT	STRINGENT	STRINGENT	YES	YES	YES	YES	3'UTR	NO	3'UTR	3'UTR	Stop codon	3'UTR
AT3G59970	F4JAK1, Q9SE60, Q9SE60-2	MTHFR1	MTHFR1	methylenetetrahydrofolate reductase 1	STRINGENT	STRINGENT	STRINGENT	YES	YES	YES	YES	3'UTR,3'UTR,3'UTR	3'UTR	3'UTR	3'UTR	NO	NO
AT3G59990	Q56Y85	MAP2B	MAP2B	methionine aminopeptidase 2B	STRINGENT	STRINGENT	STRINGENT	YES	YES	YES	YES	3'UTR,3'UTR,3'UTR,3'UTR	NO	3'UTR	3'UTR	Stop codon	3'UTR
AT3G60190	A0A178VKQ6, Q9FNX5	DL1E	ADL1E, ADL4, ADLP2, DL1E, DRP1E, EDR3	DYNAMIN-like 1E	STRINGENT	STRINGENT	STRINGENT	YES	NO	YES	YES	3'UTR	NO	3'UTR	3'UTR	NO	3'UTR
AT3G60210	Q9M1C2	AT3G60210		GroES-like family protein	STRINGENT	STRINGENT	STRINGENT	YES	YES	YES	YES	3'UTR	NO	3'UTR	3'UTR	3' UTR	3'UTR
AT3G60245	Q8RXU5	AT3G60245		Zinc-binding ribosomal protein family protein	STRINGENT	STRINGENT	STRINGENT	YES	YES	YES	YES	3'UTR	NO	3'UTR	3'UTR, 5'UTR, CDS	Stop codon	NO
AT3G60300	F4JAP8, Q4TU20, Q8W4A3	AT3G60300		RWD domain-containing protein	STRINGENT	STRINGENT	STRINGENT	YES	NO	YES	YES	CDS,CDS,3'UTR,3'UTR	3'UTR	3'UTR	3'UTR	Stop codon	CDS, 3'UTR
AT3G60600	Q8VZ95, Q8VZ95-2, Q8VZ95-3	VAP27-1	(AT)VAP, VAP, VAP27, VAP27-1	vesicle associated protein	STRINGENT	STRINGENT	STRINGENT	YES	YES	YES	YES	3'UTR,3'UTR,3'UTR	StartCodon, 5'UTR	3'UTR	3'UTR	3' UTR	3'UTR
AT3G60750	F4JBY2, Q8RWV0	AT3G60750	AtTKL1, TKL1	Transketolase	STRINGENT	STRINGENT	STRINGENT	YES	YES	YES	YES	3'UTR	CDS	3'UTR	3'UTR, 5'UTR, CDS	NO	NO
AT3G60770	P59223	AT3G60770		Ribosomal protein S13/S15	STRINGENT	STRINGENT	STRINGENT	YES	YES	YES	YES	3'UTR	NO	3'UTR	3'UTR	Stop codon	3'UTR
AT3G60820	F4JD01, P42742	PBF1	PBF1	N-terminal nucleophile aminohydrolases (Ntn hydrolases) superfamily protein	STRINGENT	STRINGENT	STRINGENT	YES	YES	YES	YES	3'UTR,3'UTR,3'UTR,3'UTR,3'UTR	NO	3'UTR	3'UTR	Stop codon	3'UTR
AT3G61110	Q9M2F1	RS27A	ARS27A, RS27A	ribosomal protein S27	STRINGENT	STRINGENT	STRINGENT	YES	YES	YES	YES	3'UTR	NO	3'UTR	3'UTR, 5'UTR	NO	NO
AT3G61200	Q9M2E4	AT3G61200		Thioesterase superfamily protein	STRINGENT	STRINGENT	STRINGENT	YES	YES	YES	YES	3'UTR	NO	3'UTR	3'UTR	NO	3'UTR
AT3G61240	Q9M2E0	AT3G61240	RH12	DEA(D/H)-box RNA helicase family protein	STRINGENT	STRINGENT	STRINGENT	YES	YES	YES	YES	3'UTR,3'UTR	NO	3'UTR	3'UTR	3' UTR	3'UTR
AT3G61440	A0A1I9LTP2, Q9S757, Q9S757-2, Q9S757-3	CYSC1	ARATH;BSAS3;1, ATCYSC1, CAS-C1, CYSC1	cysteine synthase C1	STRINGENT	STRINGENT	STRINGENT	YES	NO	YES	YES	3'UTR,3'UTR,3'UTR,3'UTR	NO	3'UTR	3'UTR	NO	NO
AT3G61470	Q9SYW8	LHCA2	LHCA2	photosystem I light harvesting complex protein	STRINGENT	STRINGENT	STRINGENT	YES	YES	YES	NO	3'UTR	NO	3'UTR	3'UTR, 5'UTR, CDS	NO	NO
AT3G62030	F4IX26, F4IX28, P34791	ROC4	CYP20-3, ROC4	rotamase CYP 4	STRINGENT	STRINGENT	STRINGENT	YES	YES	YES	YES	3'UTR,3'UTR,3'UTR	NO	3'UTR	3'UTR, CDS, 5'UTR	Stop codon	NO
AT3G62120	A0A1I9LNS4, Q9M1R2	AT3G62120	AtProRS-Cyt, ProRS-Cyt	Class II aaRS and biotin synthetases superfamily protein	STRINGENT	STRINGENT	STRINGENT	YES	YES	YES	YES	3'UTR,3'UTR,3'UTR	CDS	3'UTR	3'UTR	Stop codon	3'UTR
AT3G62250	P59233	UBQ5	UBQ5	ubiquitin 5	STRINGENT	STRINGENT	STRINGENT	YES	YES	YES	YES	3'UTR	NO	3'UTR	3'UTR	NO	NO
AT3G62290	C0Z3J4, Q9M1P5	ARFA1E	ARFA1E, ATARFA1E	ADP-ribosylation factor A1E	STRINGENT	STRINGENT	STRINGENT	YES	YES	YES	YES	5'UTR,5'UTR,5'UTR,3'UTR,3'UTR,3'UTR,CDS,CDS,CDS,3'UTR	NO	3'UTR	3'UTR, CDS	coding_intron	NO
AT3G62360	A0A1I9LSH2, Q56XW4, Q9LZQ4	AT3G62360		Carbohydrate-binding-like fold	STRINGENT	N.A.	STRINGENT	NO	NO	YES	NO	3'UTR,3'UTR	NO	3'UTR	3'UTR	NO	3'UTR
AT3G62400	Q9LZQ0	AT3G62400		cytochrome C oxidase subunit	STRINGENT	STRINGENT	STRINGENT	YES	YES	YES	YES	CDS	NO	CDS, 3'UTR	CDS	Stop codon	NO
AT3G62560	Q8VYP7	AT3G62560		Ras-related small GTP-binding family protein	STRINGENT	STRINGENT	STRINGENT	YES	NO	YES	YES	3'UTR	NO	3'UTR	3'UTR	NO	3'UTR
AT3G62580	A0A384L060	AT3G62580		Late embryogenesis abundant protein (LEA) family protein	STRINGENT	STRINGENT	STRINGENT	YES	NO	YES	YES	3'UTR	NO	3'UTR	NO	Stop codon	NO
AT3G62700	Q9LZJ5	ABCC14	ABCC14, ATMRP10, MRP10	multidrug resistance-associated protein 10	STRINGENT	STRINGENT	STRINGENT	YES	NO	YES	NO	3'UTR	3'UTR	3'UTR	3'UTR	NO	3'UTR
AT3G62790	Q9LZI6	AT3G62790		NADH-ubiquinone oxidoreductase-like protein	STRINGENT	STRINGENT	STRINGENT	YES	YES	YES	YES	3'UTR	NO	3'UTR	3'UTR	Stop codon	3'UTR
AT3G62830	Q94A44, Q9LZI2	AUD1	ATUXS2, AUD1, UXS2	NAD(P)-binding Rossmann-fold superfamily protein	STRINGENT	STRINGENT	STRINGENT	YES	NO	YES	YES	3'UTR,3'UTR	NO	3'UTR	3'UTR	NO	3'UTR
AT3G62840	O22247, Q8L3W7, Q8RUH0, Q94B79	AT3G62840		Small nuclear ribonucleoprotein family protein	STRINGENT	STRINGENT	STRINGENT	YES	YES	YES	YES	3'UTR,3'UTR	NO	3'UTR	3'UTR	NO	3'UTR
AT3G62870	Q9LZH9	AT3G62870		Ribosomal protein L7Ae/L30e/S12e/Gadd45 family protein	STRINGENT	STRINGENT	STRINGENT	YES	YES	YES	YES	3'UTR	NO	3'UTR	3'UTR	Stop codon	3'UTR
AT3G62980	Q570C0	TIR1	AtTIR1, TIR1	F-box/RNI-like superfamily protein	STRINGENT	STRINGENT	STRINGENT	YES	NO	YES	YES	3'UTR	5'UTR	3'UTR	3'UTR	NO	NO
AT3G63140	Q9LYA9	CSP41A	CSP41A	chloroplast stem-loop binding protein of 41 kDa	STRINGENT	STRINGENT	N.A.	YES	NO	NO	NO	3'UTR	NO	3'UTR	3'UTR, CDS	Stop codon, CDS	NO
AT3G63190	Q9M1X0	RRF	AtcpRRF, cpRRF, HFP108, RRF	ribosome recycling factor, chloroplast precursor	STRINGENT	STRINGENT	STRINGENT	YES	YES	YES	YES	3'UTR	3'UTR	3'UTR	3'UTR	3' UTR	3'UTR
AT3G63410	Q9LY74	APG1	APG1, E37, IEP37, VTE3	S-adenosyl-L-methionine-dependent methyltransferases superfamily protein	STRINGENT	STRINGENT	STRINGENT	YES	YES	YES	YES	3'UTR	NO	3'UTR	3'UTR	Stop codon	NO
AT3G63460	F4J109, F4J110, Q8L611	AT3G63460	SEC31B	transducin family protein / WD-40 repeat family protein	STRINGENT	STRINGENT	STRINGENT	YES	YES	YES	YES	3'UTR,3'UTR,3'UTR	NO	3'UTR	3'UTR	Stop codon	3'UTR
AT3G63490	F4J296, Q9LY66	EMB3126	EMB3126, PRPL1	Ribosomal protein L1p/L10e family	STRINGENT	STRINGENT	STRINGENT	YES	YES	YES	YES	3'UTR,3'UTR	NO	3'UTR	3'UTR	3' UTR	NO
AT3G63520	O65572	CCD1	ATCCD1, ATNCED1, CCD1, NCED1	carotenoid cleavage dioxygenase 1	STRINGENT	STRINGENT	STRINGENT	YES	NO	YES	NO	3'UTR	NO	3'UTR	3'UTR, CDS	Stop codon	3'UTR
AT4G00100	P59224	RPS13A	ATRPS13A, PFL2, RPS13, RPS13A	ribosomal protein S13A	STRINGENT	STRINGENT	STRINGENT	YES	YES	YES	YES	3'UTR	NO	3'UTR	3'UTR	Stop codon	NO
AT4G00370	Q8GX78	ANTR2	ANTR2, AtPHT4;4, PHT4;4	Major facilitator superfamily protein	STRINGENT	STRINGENT	STRINGENT	YES	NO	YES	NO	3'UTR	NO	3'UTR	3'UTR	NO	3'UTR
AT4G00570	A0A178UTQ3, Q8L7K9	NAD-ME2	NAD-ME2	NAD-dependent malic enzyme 2	STRINGENT	STRINGENT	STRINGENT	YES	NO	YES	YES	3'UTR	3'UTR, CDS	NO	NO	3' UTR	NO
AT4G00585	A0A178UY65, Q8VZT9	AT4G00585		transmembrane protein	STRINGENT	STRINGENT	STRINGENT	YES	YES	YES	YES	3'UTR	NO	3'UTR	3'UTR	Stop codon	NO
AT4G00720	Q96287	SK32	ASKTHETA, ATSK32, SK32	shaggy-like protein kinase 32	STRINGENT	STRINGENT	STRINGENT	YES	NO	YES	YES	3'UTR	NO	3'UTR	3'UTR	NO	3'UTR
AT4G00740	Q93W95	QUA3	QUA3	S-adenosyl-L-methionine-dependent methyltransferases superfamily protein	STRINGENT	STRINGENT	STRINGENT	YES	YES	YES	YES	3'UTR	3'UTR	3'UTR	3'UTR	3' UTR, Stop codon	3'UTR
AT4G00810	O23095	AT4G00810	RPP1.2, RPP1B	60S acidic ribosomal protein family	STRINGENT	STRINGENT	STRINGENT	YES	YES	YES	YES	3'UTR,3'UTR	NO	3'UTR	3'UTR	NO	NO
AT4G00860	Q38842	ATOZI1	AT0ZI1, ATOZI1	monopolar spindle protein (DUF1138)	STRINGENT	STRINGENT	STRINGENT	YES	YES	YES	YES	3'UTR	NO	3'UTR	3'UTR	3' UTR	NO
AT4G01050	A0A1P8B8J7, Q9M158	TROL	TROL	thylakoid rhodanese-like protein	STRINGENT	STRINGENT	STRINGENT	YES	YES	YES	YES	3'UTR,3'UTR	NO	3'UTR	3'UTR	Stop codon	NO
AT4G01100	A0A1P8B4I5, F4JHS4, O04619	ADNT1	ADNT1	adenine nucleotide transporter 1	STRINGENT	STRINGENT	STRINGENT	YES	YES	YES	YES	3'UTR,3'UTR	3'UTR	3'UTR	3'UTR	3' UTR	3'UTR
AT4G01150	B3H429, O04616	AT4G01150	CURT1A	CURVATURE THYLAKOID 1A-like protein	STRINGENT	STRINGENT	STRINGENT	YES	YES	YES	YES	3'UTR,3'UTR	NO	CDS, 3'UTR	3'UTR, 5'UTR, CDS	NO	NO
AT4G01290	Q56YP1, Q56YR0, Q8H1P8, Q9M141	AT4G01290	CBE1	chorismate synthase	STRINGENT	STRINGENT	STRINGENT	YES	NO	YES	NO	3'UTR,3'UTR	NO	3'UTR	3'UTR	Stop codon	NO
AT4G01310	O04603	AT4G01310	PRPL5	Ribosomal L5P family protein	STRINGENT	STRINGENT	N.A.	YES	YES	NO	NO	3'UTR	NO	3'UTR	3'UTR	Stop codon	NO
AT4G01610	Q94K85, Q94K85-2	AT4G01610	AtcathB3	Cysteine proteinases superfamily protein	STRINGENT	STRINGENT	STRINGENT	YES	NO	YES	NO	3'UTR,3'UTR	3'UTR	3'UTR	3'UTR	NO	3'UTR
AT4G01800	A0A1P8B485, F4JG57, Q9SYI0	AGY1	AGY1, AtcpSecA, SECA1	Albino or Glassy Yellow 1	STRINGENT	STRINGENT	N.A.	YES	NO	NO	NO	3'UTR	NO	3'UTR	3'UTR	Stop codon	3'UTR
AT4G01850	P17562	SAM-2	AtSAM2, MAT2, SAM-2, SAM2	S-adenosylmethionine synthetase 2	STRINGENT	STRINGENT	STRINGENT	YES	YES	YES	YES	3'UTR	NO	3'UTR	3'UTR	NO	NO
AT4G02120	A0A178UVT8, A0A178UX17, A0A1P8B6F8, A0A1P8B6F9, A0A1P8B6G0, A0A1P8B6G6	AT4G02120	CTPS3	CTP synthase family protein	STRINGENT	N.A.	STRINGENT	NO	NO	YES	NO	3'UTR,3'UTR,3'UTR,3'UTR,3'UTR	NO	3'UTR	3'UTR	NO	3'UTR
AT4G02230	P49693	AT4G02230		Ribosomal protein L19e family protein	STRINGENT	STRINGENT	STRINGENT	YES	YES	YES	YES	3'UTR	NO	3'UTR	3'UTR	NO	NO
AT4G02450	A0A178UZE3, F4JHJ0, Q8L7U4, Q8L7U4-2	AT4G02450	p23-1	HSP20-like chaperones superfamily protein	STRINGENT	STRINGENT	STRINGENT	YES	YES	YES	YES	CDS,CDS,3'UTR,3'UTR	NO	3'UTR	3'UTR	Stop codon, CDS	3'UTR
AT4G02480	O81286, Q0WM93	AT4G02480		AAA-type ATPase family protein	STRINGENT	N.A.	STRINGENT	NO	NO	YES	YES	3'UTR	NO	3'UTR	3'UTR	Stop codon	3'UTR
AT4G02530	A0A1P8B5G9, A0A1P8B5H3, O22773	AT4G02530	MPH2	chloroplast thylakoid lumen protein	STRINGENT	STRINGENT	N.A.	YES	YES	NO	NO	3'UTR,3'UTR	NO	3'UTR	3'UTR	NO	NO
AT4G02570	Q94AH6	CUL1	ATCUL1, AXR6, CUL1, ICU13	cullin 1	STRINGENT	STRINGENT	STRINGENT	YES	NO	YES	YES	3'UTR,3'UTR,3'UTR,3'UTR	CDS	3'UTR	3'UTR	Stop codon	3'UTR
AT4G02580	C0Z311, O22769	AT4G02580		NADH-ubiquinone oxidoreductase 24 kDa subunit	STRINGENT	STRINGENT	STRINGENT	YES	YES	YES	YES	3'UTR	NO	3'UTR	3'UTR	Stop codon	3'UTR
AT4G02620	Q9ZQX4	AT4G02620		vacuolar ATPase subunit F family protein	STRINGENT	STRINGENT	STRINGENT	YES	YES	YES	YES	3'UTR	NO	3'UTR	3'UTR	Stop codon	3'UTR
AT4G02790	Q8H1F6	EMB3129	AtRBGA, EMB3129, RBGA	GTP-binding family protein	STRINGENT	STRINGENT	N.A.	YES	NO	NO	NO	3'UTR	NO	3'UTR	3'UTR	3' UTR	3'UTR
AT4G02840	Q9SY09, Q9SY09-2	AT4G02840	SmD1b	Small nuclear ribonucleoprotein family protein	STRINGENT	STRINGENT	STRINGENT	YES	YES	YES	YES	3'UTR,3'UTR	NO	3'UTR	3'UTR	Stop codon	3'UTR
AT4G02920	F4JHX3, Q8RXG5	AT4G02920		hypothetical protein	STRINGENT	STRINGENT	N.A.	YES	NO	NO	NO	3'UTR,3'UTR	3'UTR	3'UTR	3'UTR	Stop codon	NO
AT4G02930	Q9ZT91	AT4G02930		GTP binding Elongation factor Tu family protein	STRINGENT	STRINGENT	STRINGENT	YES	YES	YES	YES	3'UTR	NO	3'UTR	NO	3' UTR	3'UTR
AT4G03080	Q8L7U5	BSL1	BSL1	BRI1 suppressor 1 (BSU1)-like 1	STRINGENT	STRINGENT	STRINGENT	YES	NO	YES	NO	3'UTR	NO	NO	3'UTR	3' UTR	3'UTR
AT4G03260	Q8GUJ5, Q9ZR05	AT4G03260	MASP1	Outer arm dynein light chain 1 protein	STRINGENT	STRINGENT	STRINGENT	YES	NO	YES	NO	3'UTR,3'UTR,3'UTR	5'UTR, 3'UTR	3'UTR	3'UTR	NO	3'UTR
AT4G03280	Q9ZR03, Q9ZR03-2	PETC	PETC, PGR1	photosynthetic electron transfer C	STRINGENT	STRINGENT	STRINGENT	YES	YES	YES	YES	3'UTR,3'UTR	NO	3'UTR	3'UTR, 5'UTR, CDS	NO	NO
AT4G03520	F4JG94, Q9SEU8	ATHM2	ATHM2, TRXm2	Thioredoxin superfamily protein	STRINGENT	STRINGENT	STRINGENT	YES	YES	YES	YES	3'UTR,3'UTR	NO	3'UTR	3'UTR	Stop codon	NO
AT4G03560	Q94KI8	TPC1	ATCCH1, ATTPC1, FOU2, TPC1	two-pore channel 1	STRINGENT	STRINGENT	STRINGENT	YES	NO	YES	YES	3'UTR	CDS	3'UTR	3'UTR	Stop codon	3'UTR
AT4G04020	O81439	FIB	FIB, FIB1a, PGL35	fibrillin	STRINGENT	STRINGENT	N.A.	YES	NO	NO	NO	3'UTR	NO	3'UTR	3'UTR	NO	NO
AT4G04470	Q9ZS51	PMP22	PMP22	Peroxisomal membrane 22 kDa (Mpv17/PMP22) family protein	STRINGENT	STRINGENT	STRINGENT	YES	NO	YES	NO	3'UTR	NO	NO	3'UTR	Stop codon	3'UTR
AT4G04640	Q01908	ATPC1	ATPC1	ATPase, F1 complex, gamma subunit protein	STRINGENT	STRINGENT	STRINGENT	YES	YES	YES	NO	3'UTR	NO	3'UTR	3'UTR, CDS, 5'UTR	NO	NO
AT4G04800	Q9M0Z6	MSRB3	ATMSRB3, MSRB3	methionine sulfoxide reductase B3	STRINGENT	STRINGENT	STRINGENT	YES	YES	YES	YES	3'UTR	NO	NO	3'UTR	Stop codon	3'UTR
AT4G04850	A0A0N9DZS1, Q9M0Z3, Q9M0Z3-2, Q9M0Z3-3	KEA3	ATKEA3, KEA3	K efflux antiporter 3	STRINGENT	STRINGENT	N.A.	YES	NO	NO	NO	3'UTR,3'UTR	3'UTR	CDS, 3'UTR	3'UTR, CDS	NO	3'UTR
AT4G05050	F4JGM3, P0CH33, Q3E7T8, Q3E7T8-2	UBQ11	UBQ11	ubiquitin 11	STRINGENT	STRINGENT	STRINGENT	NO	YES	YES	YES	3'UTR,3'UTR,3'UTR,3'UTR	NO	3'UTR	3'UTR, CDS	NO	NO
AT4G05180	Q41932	PSBQ-2	PSBQ, PSBQ-2, PSII-Q	photosystem II subunit Q-2	STRINGENT	STRINGENT	N.A.	YES	YES	NO	NO	3'UTR,3'UTR	NO	3'UTR	3'UTR, 5'UTR, CDS	Stop codon	NO
AT4G05530	Q9S9W2	IBR1	IBR1, SDRA	indole-3-butyric acid response 1	STRINGENT	STRINGENT	STRINGENT	YES	YES	YES	YES	3'UTR	NO	3'UTR	3'UTR	3' UTR	NO
AT4G08230	F4JFX0, Q8VY68	AT4G08230		glycine-rich protein	STRINGENT	N.A.	STRINGENT	NO	NO	YES	NO	3'UTR,3'UTR,3'UTR	NO	3'UTR	3'UTR	Stop codon	3'UTR
AT4G08280	Q93WH0, Q9SUF2	AT4G08280		Thioredoxin superfamily protein	STRINGENT	STRINGENT	STRINGENT	YES	YES	YES	YES	3'UTR,3'UTR,3'UTR	NO	3'UTR	3'UTR	Stop codon, 3' UTR	3'UTR
AT4G08390	F4JFY4, F4JFY5, Q42592	SAPX	SAPX	stromal ascorbate peroxidase	STRINGENT	STRINGENT	STRINGENT	YES	YES	YES	YES	3'UTR,3'UTR,3'UTR,3'UTR,3'UTR	NO	3'UTR	3'UTR	CDS, 3' UTR	3'UTR
AT4G08520	Q8H1F4	AT4G08520		SNARE-like superfamily protein	STRINGENT	N.A.	STRINGENT	NO	NO	NO	YES	3'UTR	NO	3'UTR	3'UTR	Stop codon	3'UTR
AT4G09000	A0A178UZ53, A0A178V1F3, F4JJ94, P42643	GRF1	GF14 CHI, GRF1	general regulatory factor 1	STRINGENT	STRINGENT	STRINGENT	YES	YES	YES	YES	3'UTR,3'UTR	NO	3'UTR	5'UTR, 3'UTR	3' UTR	NO
AT4G09010	A0A1P8B8W6, A0A1P8B8Y3, P82281	TL29	APX4, TL29	ascorbate peroxidase 4	STRINGENT	STRINGENT	N.A.	YES	YES	NO	NO	CDS,CDS,CDS,3'UTR	NO	3'UTR	3'UTR, CDS	Stop codon	NO
AT4G09320	P39207	NDPK1	ATNDK1, NDK1, NDPK1	nucleoside diphosphate kinase	STRINGENT	STRINGENT	STRINGENT	YES	YES	YES	YES	CDS	NO	CDS	CDS	NO	NO
AT4G09670	Q9SZ83	AT4G09670		Oxidoreductase family protein	STRINGENT	STRINGENT	STRINGENT	YES	YES	YES	NO	3'UTR	3'UTR	3'UTR	3'UTR	Stop codon	3'UTR
AT4G09800	P34788	RPS18C	RPS18C	S18 ribosomal protein	STRINGENT	STRINGENT	STRINGENT	YES	YES	YES	YES	5'UTR,CDS,3'UTR	NO	3'UTR	3'UTR, CDS	Stop codon	NO
AT4G09830	Q9SZ98	AT4G09830		nuclear receptor family 2 group C protein	STRINGENT	STRINGENT	STRINGENT	YES	YES	YES	YES	3'UTR	NO	3'UTR	3'UTR	Stop codon	3'UTR
AT4G10300	Q9SV91	AT4G10300	TRR14	RmlC-like cupins superfamily protein	STRINGENT	STRINGENT	STRINGENT	YES	YES	YES	NO	3'UTR	NO	CDS, 3'UTR	3'UTR, CDS	Stop codon	3'UTR
AT4G10320	F4JLM5	AT4G10320		tRNA synthetase class I (I, L, M and V) family protein	STRINGENT	STRINGENT	STRINGENT	YES	YES	YES	YES	3'UTR	NO	3'UTR	3'UTR	Stop codon	3'UTR
AT4G10340	Q9XF89	LHCB5	LHCB5	light harvesting complex of photosystem II 5	STRINGENT	STRINGENT	STRINGENT	YES	YES	YES	YES	3'UTR	NO	3'UTR	CDS, 3'UTR, 5'UTR	NO	NO
AT4G10450	A0A1P8B5B3, Q9SZX9	AT4G10450		Ribosomal protein L6 family	STRINGENT	N.A.	STRINGENT	NO	NO	NO	YES	3'UTR,3'UTR	NO	3'UTR	3'UTR	NO	3'UTR
AT4G10480	A8MQP6, Q9SZY1	AT4G10480		Nascent polypeptide-associated complex (NAC), alpha subunit family protein	STRINGENT	STRINGENT	STRINGENT	YES	YES	YES	YES	3'UTR,3'UTR	NO	3'UTR	3'UTR	Stop codon	NO
AT4G10610	C0Z2M5, F4JME0, Q9S7N9	CID12	ATRBP37, CID12, RBP37	CTC-interacting domain 12	STRINGENT	STRINGENT	STRINGENT	YES	YES	YES	YES	3'UTR,3'UTR	3'UTR	3'UTR	3'UTR	3' UTR	3'UTR
AT4G11010	O49203	NDPK3	NDPK3	nucleoside diphosphate kinase 3	STRINGENT	STRINGENT	STRINGENT	YES	YES	YES	YES	3'UTR	CDS, 5'UTR	3'UTR	3'UTR, 5'UTR	Stop codon	NO
AT4G11150	A0A178UT42, Q39258	TUF	emb2448, TUF, TUFF, VHA-E1	vacuolar ATP synthase subunit E1	STRINGENT	STRINGENT	STRINGENT	YES	YES	YES	YES	3'UTR	NO	3'UTR	3'UTR	Stop codon	3'UTR
AT4G11175	O82499	AT4G11175		Nucleic acid-binding, OB-fold-like protein	STRINGENT	STRINGENT	STRINGENT	YES	YES	YES	NO	3'UTR	NO	3'UTR	3'UTR	Stop codon	NO
AT4G11260	Q9SUT5	SGT1B	ATSGT1B, EDM1, ETA3, RPR1, SGT1B	phosphatase-like protein	STRINGENT	STRINGENT	STRINGENT	YES	YES	YES	YES	3'UTR	NO	3'UTR	3'UTR	Stop codon	NO
AT4G11420	Q9LD55	EIF3A	ATEIF3A-1, ATTIF3A1, EIF3A, EIF3A-1, TIF3A1	eukaryotic translation initiation factor 3A	STRINGENT	STRINGENT	STRINGENT	YES	YES	YES	YES	3'UTR	3'UTR	3'UTR	3'UTR	Stop codon	NO
AT4G11600	A0A178V0M2, O48646	GPX6	ATGPX6, GPX6, GPXL6, LSC803, PHGPX	glutathione peroxidase 6	STRINGENT	STRINGENT	STRINGENT	YES	YES	YES	YES	3'UTR	3'UTR	3'UTR	3'UTR	Stop codon	3'UTR
AT4G12420	Q9SU40	SKU5	SKU5	Cupredoxin superfamily protein	STRINGENT	STRINGENT	STRINGENT	YES	NO	YES	YES	3'UTR	NO	3'UTR	3'UTR, 5'UTR	NO	NO
AT4G12590	Q9SU27	AT4G12590		ER membrane protein complex subunit-like protein (Protein of unknown function DUF106, transmembrane)	STRINGENT	STRINGENT	STRINGENT	YES	YES	YES	YES	3'UTR	NO	3'UTR	3'UTR	Stop codon	3'UTR
AT4G12600	F4JRD3, Q9SU26	AT4G12600		Ribosomal protein L7Ae/L30e/S12e/Gadd45 family protein	STRINGENT	STRINGENT	STRINGENT	YES	YES	YES	YES	3'UTR,3'UTR	NO	3'UTR	3'UTR	Stop codon	3'UTR
AT4G12650	F4JRE0	AT4G12650	TMN12	Endomembrane protein 70 protein family	STRINGENT	N.A.	STRINGENT	NO	NO	NO	YES	3'UTR	NO	3'UTR	5'UTR	Stop codon	3'UTR
AT4G12790	Q8W4C1	AT4G12790		P-loop containing nucleoside triphosphate hydrolases superfamily protein	STRINGENT	N.A.	STRINGENT	NO	NO	YES	NO	3'UTR,3'UTR,3'UTR,3'UTR,3'UTR,3'UTR	NO	3'UTR	3'UTR, 5'UTR	NO	3'UTR, CDS
AT4G12800	A0A178V7V9, A0A1P8B6D0, Q9SUI4	PSAL	PSAL	photosystem I subunit l	STRINGENT	STRINGENT	N.A.	YES	YES	NO	NO	3'UTR,3'UTR	NO	3'UTR	3'UTR, CDS, 5'UTR	NO	NO
AT4G13170	Q9SVR0	AT4G13170		Ribosomal protein L13 family protein	STRINGENT	STRINGENT	STRINGENT	YES	YES	YES	YES	3'UTR	NO	3'UTR	3'UTR	Stop codon	3'UTR
AT4G13350	Q8W4K6	NIG	NIG	NSP (nuclear shuttle protein)-interacting GTPase	STRINGENT	STRINGENT	STRINGENT	YES	NO	YES	YES	3'UTR,3'UTR	NO	3'UTR	3'UTR	3' UTR	3'UTR
AT4G13430	C0Z3H8, Q94AR8	IIL1	ATLEUC1, IIL1	isopropyl malate isomerase large subunit 1	STRINGENT	STRINGENT	STRINGENT	YES	YES	YES	YES	3'UTR	NO	3'UTR	3'UTR	Stop codon	NO
AT4G13520	Q9T0H2	SMAP1	SMAP1	small acidic protein 1	STRINGENT	STRINGENT	STRINGENT	YES	YES	YES	YES	3'UTR	NO	3'UTR	3'UTR	NO	NO
AT4G13530	Q67ZR8, Q8VXX1	AT4G13530		transmembrane protein	STRINGENT	N.A.	STRINGENT	NO	NO	YES	NO	3'UTR,3'UTR	3'UTR	3'UTR	3'UTR	Stop codon	3'UTR
AT4G13615	Q8GXU7	AT4G13615		Uncharacterized protein family SERF	STRINGENT	STRINGENT	STRINGENT	YES	YES	YES	YES	3'UTR	NO	3'UTR	3'UTR, 5'UTR	Stop codon	NO
AT4G13850	A8MRQ4, A8MSB9, F4JTU2, Q9SVM8	GR-RBP2	ATGRP2, GR-RBP2, GRP2, RBGA5	glycine-rich RNA-binding protein 2	STRINGENT	STRINGENT	STRINGENT	YES	NO	YES	YES	3'UTR,3'UTR,3'UTR,3'UTR	NO	3'UTR	3'UTR, 5'UTR	Stop codon	NO
AT4G13940	A8MQP1, C0Z3F3, F4JTV4, F4JTV5, O23255	HOG1	ATSAHH1, EMB1395, HOG1, MEE58, SAH1, SAHH1	S-adenosyl-L-homocysteine hydrolase	STRINGENT	STRINGENT	STRINGENT	YES	YES	YES	YES	3'UTR,3'UTR,3'UTR,3'UTR	NO	3'UTR, CDS	3'UTR, CDS	NO	NO
AT4G14110	A0A178V157, P43255	9	COP9, CSN8, EMB143, FUS7	COP9 signalosome, subunit CSN8	STRINGENT	STRINGENT	STRINGENT	YES	YES	YES	YES	3'UTR	NO	3'UTR	CDS, 3'UTR	Stop codon	3'UTR
AT4G14160	F4JUM1, F4JUM3, O23275, Q8VXX0	AT4G14160	AtSEC23F	Sec23/Sec24 protein transport family protein	STRINGENT	STRINGENT	STRINGENT	YES	YES	YES	YES	3'UTR,3'UTR,3'UTR	3'UTR	3'UTR	3'UTR	Stop codon, 3' UTR	3'UTR
AT4G14210	Q07356	PDS3	PDE226, PDS, PDS3	phytoene desaturase 3	STRINGENT	STRINGENT	N.A.	YES	YES	NO	NO	3'UTR,3'UTR,3'UTR	CDS	3'UTR	3'UTR	Stop codon	3'UTR
AT4G14320	F4JUQ4, O23290	AT4G14320	API2, RPL36aB	Zinc-binding ribosomal protein family protein	STRINGENT	STRINGENT	STRINGENT	YES	YES	YES	YES	3'UTR	NO	3'UTR	3'UTR, 5'UTR	coding_intron	NO
AT4G14420	A0A178V3W1	AT4G14420		HR-like lesion-inducing protein-like protein	STRINGENT	STRINGENT	STRINGENT	YES	YES	YES	YES	3'UTR	NO	3'UTR	3'UTR	Stop codon	NO
AT4G14615	A0A178V1H1, Q8L9X5	AT4G14615		sporulation-specific protein	STRINGENT	N.A.	STRINGENT	NO	NO	YES	YES	3'UTR	NO	3'UTR	3'UTR	Stop codon	3'UTR
AT4G14710	A0A178UX14, A0A1P8B4X2, B3H6E4, F4JIE0, F4JIE1, Q8W108	ATARD2	ATARD2	RmlC-like cupins superfamily protein	STRINGENT	STRINGENT	STRINGENT	YES	YES	YES	YES	3'UTR,3'UTR,3'UTR,3'UTR,3'UTR	NO	3'UTR	3'UTR	Stop codon	3'UTR
AT4G14716	A0A1P8B4W3, Q8GXE2	ARD1	ARD1, ATARD1, SGB3	acireductone dioxygenase 1	STRINGENT	STRINGENT	STRINGENT	YES	NO	YES	NO	3'UTR,3'UTR	NO	3'UTR	3'UTR	Stop codon	3'UTR
AT4G14800	F4JIF9, O24633	PBD2	PBD2	20S proteasome beta subunit D2	STRINGENT	STRINGENT	STRINGENT	YES	YES	YES	YES	3'UTR,3'UTR	NO	NO	3'UTR	Stop codon	3'UTR
AT4G14880	P47998, Q0WLF5	OASA1	ATCYS-3A, CYTACS1, OASA1, OLD3	O-acetylserine (thiol) lyase (OAS-TL) isoform A1	STRINGENT	STRINGENT	STRINGENT	YES	YES	YES	YES	3'UTR,3'UTR,3'UTR,3'UTR,3'UTR	NO	3'UTR	3'UTR, 5'UTR	NO	3'UTR
AT4G14960	B9DFF8, P29511	TUA6	TUA6	Tubulin/FtsZ family protein	STRINGENT	STRINGENT	STRINGENT	YES	YES	YES	YES	3'UTR,3'UTR	NO	3'UTR	3'UTR	Stop codon	NO
AT4G15000	A8MS28, P51419	AT4G15000		Ribosomal L27e protein family	STRINGENT	STRINGENT	STRINGENT	YES	YES	YES	YES	3'UTR,CDS,3'UTR,3'UTR,3'UTR	NO	CDS, 3'UTR	3'UTR, 5'UTR, CDS	Stop codon	NO
AT4G15470	Q94A20	AT4G15470	AtLFG5, LFG5	Bax inhibitor-1 family protein	STRINGENT	STRINGENT	STRINGENT	YES	NO	YES	YES	CDS,3'UTR	NO	3'UTR	3'UTR, 5'UTR	Stop codon	3'UTR
AT4G15545	Q93W28	AT4G15545		PH-response transcription factor	STRINGENT	STRINGENT	STRINGENT	YES	NO	YES	NO	3'UTR	NO	3'UTR	3'UTR, 5'UTR	Stop codon	NO
AT4G15560	Q38854, Q944G7	CLA1	AtCLA1, CLA, CLA1, DEF, DXPS2, DXS, DXS1	Deoxyxylulose-5-phosphate synthase	STRINGENT	STRINGENT	STRINGENT	YES	YES	YES	NO	3'UTR	3'UTR	3'UTR	3'UTR, CDS	Stop codon	NO
AT4G15802	A0A178UVR1, Q8GW48	HSBP	AtHSBP, HSBP	heat shock factor binding protein	STRINGENT	STRINGENT	STRINGENT	YES	NO	YES	YES	3'UTR	NO	3'UTR	3'UTR	Stop codon	3'UTR
AT4G15930	A0A1P8B7F1, O23442, Q84VW0	AT4G15930		Dynein light chain type 1 family protein	STRINGENT	N.A.	STRINGENT	NO	NO	YES	NO	3'UTR,3'UTR	3'UTR	3'UTR	3'UTR	Stop codon	3'UTR
AT4G16130	O23461	1	ARA1, ATISA1, ISA1	arabinose kinase	STRINGENT	STRINGENT	STRINGENT	YES	NO	YES	NO	3'UTR	NO	NO	3'UTR	NO	NO
AT4G16143	F4JL11, Q8L7D3	IMPA-2	IMPA-2	importin alpha isoform 2	STRINGENT	STRINGENT	STRINGENT	YES	NO	YES	YES	3'UTR,3'UTR	NO	3'UTR	3'UTR	3' UTR	NO
AT4G16155	F4JLP5	AT4G16155		dihydrolipoamide dehydrogenase	STRINGENT	STRINGENT	STRINGENT	YES	YES	YES	YES	3'UTR	NO	3'UTR	3'UTR	Stop codon	3'UTR
AT4G16190	Q9SUL1	AT4G16190		Papain family cysteine protease	STRINGENT	STRINGENT	STRINGENT	NO	YES	YES	YES	3'UTR	NO	3'UTR	3'UTR, CDS	NO	NO
AT4G16360					STRINGENT	N.A.	STRINGENT	NO	NO	YES	NO	3'UTR	3'UTR	NO	NO	NO	NO
AT4G16450	Q84W12	AT4G16450		NADH-ubiquinone oxidoreductase	STRINGENT	STRINGENT	STRINGENT	YES	YES	YES	YES	3'UTR,3'UTR,3'UTR	3'UTR	3'UTR	3'UTR	Stop codon	NO
AT4G16520	A0A1P8B738, Q8VYK7	ATG8F	ATG8F	Ubiquitin-like superfamily protein	STRINGENT	N.A.	STRINGENT	NO	NO	YES	NO	3'UTR,3'UTR,3'UTR	NO	3'UTR	3'UTR, CDS, 5'UTR	NO	3'UTR
AT4G16720	O23515	AT4G16720		Ribosomal protein L23/L15e family protein	STRINGENT	STRINGENT	STRINGENT	YES	YES	YES	YES	3'UTR	NO	3'UTR	3'UTR	Stop codon	NO
AT4G16760	F4JMK8, O65202	ACX1	ACX1, ATACX1	acyl-CoA oxidase 1	STRINGENT	STRINGENT	STRINGENT	YES	YES	YES	YES	3'UTR,3'UTR	NO	3'UTR	3'UTR	Stop codon	3'UTR
AT4G16830	O23523, O23523-2, O23523-3	AT4G16830	AtRGGA	Hyaluronan / mRNA binding family	STRINGENT	STRINGENT	STRINGENT	YES	NO	YES	NO	3'UTR,3'UTR,3'UTR	NO	3'UTR	3'UTR	NO	3'UTR
AT4G17040	Q8LB10	CLPR4	CLPR4, HON5	CLP protease R subunit 4	STRINGENT	STRINGENT	STRINGENT	YES	YES	YES	YES	3'UTR	NO	3'UTR	3'UTR	3' UTR	3'UTR
AT4G17050	A0A178V390, Q8GXV5	UGLYAH	UGLYAH	ureidoglycine aminohydrolase	STRINGENT	STRINGENT	STRINGENT	YES	NO	YES	YES	3'UTR	NO	3'UTR	3'UTR	Stop codon	3'UTR
AT4G17100	F4JNE1	AT4G17100		poly(U)-specific endoribonuclease-B protein	STRINGENT	N.A.	STRINGENT	NO	NO	YES	YES	3'UTR	NO	NO	3'UTR	Stop codon	NO
AT4G17170	P92963	RABB1C	AT-RAB2, ATRAB-B1B, ATRAB2A, ATRABB1C, RAB-B1B, RAB2A, RABB1C	RAB GTPase homolog B1C	STRINGENT	STRINGENT	STRINGENT	YES	YES	YES	YES	3'UTR	NO	3'UTR	3'UTR	Stop codon	NO
AT4G17270	Q9M0M4	AT4G17270		Mo25 family protein	STRINGENT	STRINGENT	STRINGENT	YES	YES	YES	YES	3'UTR	NO	3'UTR	3'UTR	Stop codon	3'UTR
AT4G17300	A0A1P8B3X2, O48593	NS1	ATNS1, NS1, OVA8	Class II aminoacyl-tRNA and biotin synthetases superfamily protein	STRINGENT	STRINGENT	STRINGENT	YES	NO	YES	NO	3'UTR,3'UTR	NO	3'UTR	3'UTR	NO	3'UTR
AT4G17330	A0A1P8B770, F4JP43, Q8LPI8, Q9M0M3	G2484-1	ATG2484-1, G2484-1	G2484-1 protein	STRINGENT	STRINGENT	STRINGENT	YES	NO	YES	NO	3'UTR,3'UTR,3'UTR	NO	3'UTR	3'UTR	3' UTR	3'UTR
AT4G17390	Q8VYF1	AT4G17390		Ribosomal protein L23/L15e family protein	STRINGENT	STRINGENT	STRINGENT	YES	YES	YES	YES	3'UTR	NO	3'UTR	3'UTR	Stop codon	NO
AT4G17530	Q9SEH3	RAB1C	ATRAB1C, ATRABD2C, RAB1C	RAB GTPase homolog 1C	STRINGENT	STRINGENT	STRINGENT	YES	NO	YES	NO	3'UTR	NO	3'UTR	3'UTR, 5'UTR	NO	3'UTR
AT4G17560	Q8W463	AT4G17560		Ribosomal protein L19 family protein	STRINGENT	STRINGENT	STRINGENT	YES	YES	NO	YES	3'UTR	NO	3'UTR	3'UTR, 5'UTR	3' UTR	3'UTR
AT4G18030	Q94EJ6	AT4G18030		S-adenosyl-L-methionine-dependent methyltransferases superfamily protein	STRINGENT	STRINGENT	STRINGENT	YES	YES	YES	YES	3'UTR	3'UTR	3'UTR	3'UTR	NO	3'UTR
AT4G18100	P49211	AT4G18100		Ribosomal protein L32e	STRINGENT	STRINGENT	STRINGENT	YES	YES	YES	YES	3'UTR	NO	3'UTR	3'UTR	Stop codon	NO
AT4G18480	P16127	CHLI1	CH-42, CH42, CHL11, CHLI-1, CHLI1, LOST1	P-loop containing nucleoside triphosphate hydrolases superfamily protein	STRINGENT	STRINGENT	N.A.	YES	NO	NO	NO	3'UTR	NO	3'UTR	3'UTR	CDS	NO
AT4G18730	P42794, P42794-2	RPL16B	RPL16B	ribosomal protein L16B	STRINGENT	STRINGENT	STRINGENT	YES	YES	YES	YES	3'UTR	NO	3'UTR	3'UTR	Stop codon	NO
AT4G18810	F4JRN8, Q8VYA4	AT4G18810		NAD(P)-binding Rossmann-fold superfamily protein	STRINGENT	STRINGENT	STRINGENT	YES	YES	YES	NO	3'UTR	NO	3'UTR	3'UTR	coding_intron	3'UTR
AT4G19006	A0A1P8B6G3, Q8GYA6	AT4G19006		Proteasome component (PCI) domain protein	STRINGENT	STRINGENT	STRINGENT	YES	NO	YES	YES	3'UTR,3'UTR	3'UTR	3'UTR	3'UTR	NO	3'UTR
AT4G19200	Q9M0L8	AT4G19200		proline-rich family protein	STRINGENT	STRINGENT	STRINGENT	YES	YES	YES	YES	3'UTR	NO	3'UTR	3'UTR	Stop codon	NO
AT4G19210	Q8LPJ4	ABCE2	ABCE2, ATRLI2, RLI2	RNAse l inhibitor protein 2	STRINGENT	STRINGENT	STRINGENT	YES	YES	YES	YES	3'UTR	NO	3'UTR	3'UTR	3' UTR	3'UTR
AT4G19350	Q8LAF5	EMB3006	EMB3006	embryo defective 3006	STRINGENT	STRINGENT	STRINGENT	YES	YES	YES	YES	3'UTR	3'UTR	NO	3'UTR	Stop codon	3'UTR
AT4G19410	F4JT64, Q940J8	AT4G19410	AtPAE7, PAE7	Pectinacetylesterase family protein	STRINGENT	STRINGENT	STRINGENT	YES	YES	YES	YES	3'UTR	NO	3'UTR	3'UTR	NO	3'UTR
AT4G20150	O65429, Q94AL6	AT4G20150		excitatory amino acid transporter	STRINGENT	STRINGENT	STRINGENT	YES	YES	YES	YES	3'UTR	NO	3'UTR	3'UTR, 5'UTR	3' UTR	3'UTR
AT4G20260	F4JUT8, F4JUT9, Q96262, Q96262-2	PCAP1	ATPCAP1, MDP25, PCAP1	plasma-membrane associated cation-binding protein 1	STRINGENT	STRINGENT	STRINGENT	YES	YES	YES	YES	3'UTR,3'UTR,3'UTR,3'UTR,3'UTR,3'UTR,3'UTR,3'UTR,3'UTR,3'UTR	NO	3'UTR	3'UTR, 5'UTR, CDS	NO	NO
AT4G20360	P17745	RABE1b	ATRAB8D, ATRABE1B, RABE1b	RAB GTPase homolog E1B	STRINGENT	STRINGENT	N.A.	YES	YES	NO	NO	3'UTR	NO	3'UTR	3'UTR, 5'UTR, CDS	CDS	NO
AT4G20380	A0A178V3Z8, A0A1P8B450, F4JUW0, P94077, P94077-2	LSD1	LSD1	LSD1 zinc finger family protein	STRINGENT	N.A.	STRINGENT	NO	NO	YES	NO	3'UTR,3'UTR,3'UTR,3'UTR,3'UTR,3'UTR,3'UTR,3'UTR,3'UTR	NO	3'UTR	3'UTR	Stop codon	3'UTR
AT4G20410	A0A1P8B661, Q9SPE5	GSNAP	GAMMA-SNAP, GSNAP	gamma-soluble NSF attachment protein	STRINGENT	STRINGENT	STRINGENT	YES	NO	YES	YES	3'UTR,3'UTR	NO	3'UTR	3'UTR	Stop codon	3'UTR
AT4G20850	F4JVN6	TPP2	TPP2	tripeptidyl peptidase ii	STRINGENT	STRINGENT	STRINGENT	YES	YES	YES	YES	3'UTR	3'UTR, CDS	3'UTR	3'UTR	Stop codon	NO
AT4G20980	P56820	AT4G20980		Eukaryotic translation initiation factor 3 subunit 7 (eIF-3)	STRINGENT	STRINGENT	STRINGENT	YES	YES	YES	YES	3'UTR,3'UTR,3'UTR	NO	3'UTR	3'UTR	NO	3'UTR
AT4G21105	A8MSE0, Q944S8	AT4G21105		cytochrome-c oxidase/ electron carrier	STRINGENT	STRINGENT	STRINGENT	YES	YES	YES	YES	CDS,CDS,CDS,3'UTR,3'UTR,3'UTR,3'UTR,CDS,3'UTR,3'UTR,3'UTR	NO	3'UTR	3'UTR, CDS	coding_intron	3'UTR
AT4G21110	O49553	AT4G21110		G10 family protein	STRINGENT	STRINGENT	STRINGENT	YES	YES	YES	YES	3'UTR,3'UTR	NO	3'UTR	3'UTR	Stop codon	3'UTR
AT4G21150	F4JIM7, Q93Z16	HAP6	HAP6, RPN2	ribophorin II (RPN2) family protein	STRINGENT	STRINGENT	STRINGENT	YES	YES	YES	YES	3'UTR,3'UTR,3'UTR	NO	3'UTR	3'UTR	Stop codon	3'UTR
AT4G21210	O49562, O49562-2	RP1	ATRP1, RP1	PPDK regulatory protein	STRINGENT	STRINGENT	N.A.	YES	NO	NO	NO	3'UTR,3'UTR	NO	NO	3'UTR	Stop codon	3'UTR
AT4G21280	A0A178UY46, Q9XFT3, Q9XFT3-2	PSBQA	PSBQ, PSBQ-1, PSBQA	photosystem II subunit QA	STRINGENT	STRINGENT	N.A.	YES	YES	NO	NO	3'UTR,3'UTR	NO	3'UTR	3'UTR, 5'UTR, CDS	NO	NO
AT4G21580	A8MRW5, B9DGL1, O65423	AT4G21580		oxidoreductase, zinc-binding dehydrogenase family protein	STRINGENT	STRINGENT	STRINGENT	YES	YES	YES	YES	3'UTR,3'UTR,3'UTR	NO	3'UTR	3'UTR	NO	3'UTR
AT4G21600	F4JJL3	ENDO5	ENDO5	endonuclease 5	STRINGENT	N.A.	STRINGENT	NO	NO	YES	YES	3'UTR	NO	NO	5'UTR	NO	NO
AT4G21660	A0A1P8B4Y6, F4JJM1, Q8H0V8	AT4G21660		proline-rich spliceosome-associated (PSP) family protein	STRINGENT	STRINGENT	STRINGENT	YES	NO	YES	YES	3'UTR,3'UTR,3'UTR	CDS	3'UTR	3'UTR	Stop codon	3'UTR
AT4G21790	Q9FEG2	TOM1	ATTOM1, TOM1	tobamovirus multiplication 1	STRINGENT	N.A.	STRINGENT	NO	NO	YES	YES	3'UTR	5'UTR	3'UTR	3'UTR	3' UTR	3'UTR
AT4G21810	A0A178UW86, Q8VZ96	DER2.1	DER2.1	DERLIN-2.1	STRINGENT	STRINGENT	STRINGENT	YES	NO	YES	NO	3'UTR	NO	3'UTR	3'UTR	Stop codon	3'UTR
AT4G21860	Q9C5C8, Q9C5C8-2	MSRB2	MSRB2	methionine sulfoxide reductase B 2	STRINGENT	STRINGENT	STRINGENT	YES	YES	YES	YES	3'UTR,3'UTR,3'UTR	NO	3'UTR	3'UTR	Stop codon	NO
AT4G21980	A8MS84, Q8LEM4	APG8A	APG8A, ATG8A	Ubiquitin-like superfamily protein	STRINGENT	STRINGENT	STRINGENT	YES	NO	YES	YES	3'UTR,3'UTR	NO	NO	3'UTR	Stop codon	3'UTR
AT4G22000	O65448	AT4G22000		tyrosine sulfotransferase-like protein	STRINGENT	N.A.	STRINGENT	NO	NO	YES	YES	3'UTR	NO	3'UTR	3'UTR	NO	3'UTR
AT4G22220	O49627	ISU1	ATISU1, ISU1	SufE/NifU family protein	STRINGENT	STRINGENT	STRINGENT	YES	YES	YES	YES	3'UTR	NO	3'UTR	3'UTR	3' UTR	3'UTR
AT4G22260	Q56X52	IM	IM, IM1, PTOX	Alternative oxidase family protein	STRINGENT	STRINGENT	STRINGENT	YES	YES	YES	YES	3'UTR	NO	3'UTR	3'UTR	Stop codon	3'UTR
AT4G22310	O49636	AT4G22310		Uncharacterized protein family (UPF0041)	STRINGENT	STRINGENT	STRINGENT	YES	YES	YES	YES	3'UTR	NO	3'UTR	3'UTR	Stop codon	3'UTR
AT4G22330	Q94IB9	ATCES1	AtACER, ATCES1	Alkaline phytoceramidase (aPHC)	STRINGENT	STRINGENT	STRINGENT	YES	NO	YES	YES	3'UTR	NO	3'UTR	3'UTR	NO	NO
AT4G22670	A0A178UWH0, Q93YR3	HIP1	AtHip1, HIP1, TPR11	HSP70-interacting protein 1	STRINGENT	STRINGENT	STRINGENT	YES	YES	YES	YES	3'UTR	3'UTR	3'UTR	3'UTR, CDS	Stop codon	3'UTR
AT4G22890	A0A2H1ZEN5, Q8H112, Q8H112-2, Q8H112-3	PGR5-LIKE A	PGR5-LIKE A	PGR5-LIKE A	STRINGENT	STRINGENT	N.A.	YES	NO	NO	NO	3'UTR,3'UTR,3'UTR,3'UTR,3'UTR	NO	3'UTR	3'UTR, CDS, 5'UTR	NO	NO
AT4G23100	F4JMS5, P46309	GSH1	ATECS1, AtGSH1, CAD2, GSH1, GSHA, PAD2, RML1	glutamate-cysteine ligase	STRINGENT	STRINGENT	STRINGENT	YES	YES	YES	YES	3'UTR,3'UTR	CDS	3'UTR	3'UTR	coding_intron	3'UTR
AT4G23400	Q8LAA6	PIP1;5	PIP1;5, PIP1D	plasma membrane intrinsic protein 1;5	STRINGENT	N.A.	STRINGENT	NO	NO	YES	NO	3'UTR	NO	3'UTR	3'UTR	NO	NO
AT4G23470	A0A1P8B421, F4JNK5, Q67XV0, Q67YE3, Q681W9, Q8LCK6, Q8W458	AT4G23470		PLAC8 family protein	STRINGENT	STRINGENT	STRINGENT	YES	YES	YES	YES	3'UTR,3'UTR,3'UTR,3'UTR	3'UTR	3'UTR	3'UTR	CDS, Stop codon	3'UTR
AT4G23630	Q9SUR3	BTI1	BTI1, RTN1, RTNLB1	VIRB2-interacting protein 1	STRINGENT	STRINGENT	STRINGENT	YES	YES	YES	YES	3'UTR,3'UTR	NO	3'UTR	3'UTR	Stop codon	NO
AT4G23650	Q42479	CDPK6	AtCDPK6, CDPK6, CPK3	calcium-dependent protein kinase 6	STRINGENT	STRINGENT	STRINGENT	YES	NO	YES	YES	3'UTR	NO	3'UTR	3'UTR	NO	3'UTR
AT4G23710	O82629	VAG2	VAG2, VATG2, VHA-G2	vacuolar ATP synthase subunit G2	STRINGENT	STRINGENT	STRINGENT	YES	NO	YES	YES	3'UTR	NO	3'UTR	3'UTR	Stop codon	3'UTR
AT4G23760	F4JPC0, Q8LFB1	AT4G23760		Cox19-like CHCH family protein	STRINGENT	STRINGENT	STRINGENT	YES	YES	YES	YES	3'UTR	3'UTR	NO	3'UTR	NO	3'UTR
AT4G23850	Q9T0A0	LACS4	LACS4	AMP-dependent synthetase and ligase family protein	STRINGENT	STRINGENT	STRINGENT	YES	NO	YES	YES	3'UTR	NO	3'UTR	3'UTR	Stop codon	3'UTR
AT4G23885	Q2HIQ5	AT4G23885		hypothetical protein	STRINGENT	STRINGENT	STRINGENT	YES	NO	YES	YES	3'UTR	NO	NO	NO	NO	3'UTR
AT4G24190	F4JQ55, Q9STX5	SHD	AtHsp90-7, AtHsp90.7, HSP90.7, SHD	Chaperone protein htpG family protein	STRINGENT	STRINGENT	STRINGENT	YES	YES	YES	YES	3'UTR,3'UTR	NO	3'UTR	3'UTR	Stop codon	NO
AT4G24280	Q9STW6	cpHsc70-1	cpHsc70-1	chloroplast heat shock protein 70-1	STRINGENT	STRINGENT	STRINGENT	YES	YES	YES	YES	3'UTR	3'UTR	3'UTR	3'UTR	CDS, Stop codon	NO
AT4G24520	F4JQY4, Q9SB48	ATR1	AR1, AtCPR1, ATR1	P450 reductase 1	STRINGENT	STRINGENT	STRINGENT	YES	YES	YES	YES	3'UTR,3'UTR	NO	3'UTR	3'UTR	Stop codon	3'UTR
AT4G24550	F4JQY9, F4JQZ0, Q9SB50	AT4G24550	AP4M	Clathrin adaptor complexes medium subunit family protein	STRINGENT	STRINGENT	STRINGENT	YES	YES	YES	YES	3'UTR,3'UTR,3'UTR	NO	3'UTR	3'UTR	3' UTR	3'UTR
AT4G24620	Q8H103, Q8H103-2	PGI1	PGI, PGI1	phosphoglucose isomerase 1	STRINGENT	STRINGENT	STRINGENT	YES	NO	YES	YES	3'UTR,3'UTR	3'UTR	3'UTR	3'UTR	Stop codon	3'UTR
AT4G24750	Q0WWT7	AT4G24750		Rhodanese/Cell cycle control phosphatase superfamily protein	STRINGENT	STRINGENT	STRINGENT	YES	YES	YES	YES	3'UTR	NO	3'UTR	3'UTR	Stop codon	NO
AT4G24770	Q04836, Q04836-2, Q04836-3	RBP31	ATRBP31, ATRBP33, CP31, RBP31	31-kDa RNA binding protein	STRINGENT	STRINGENT	STRINGENT	YES	YES	YES	YES	3'UTR,3'UTR	CDS	3'UTR	3'UTR, CDS, 5'UTR	Stop codon	NO
AT4G24820	Q93Y35	AT4G24820		26S proteasome regulatory subunit Rpn7	STRINGENT	STRINGENT	STRINGENT	YES	YES	YES	YES	3'UTR,3'UTR,3'UTR	NO	3'UTR	3'UTR	3' UTR	3'UTR
AT4G24920	A0A1P8B6L2, P0DI74	AT4G24920		secE/sec61-gamma protein transport protein	STRINGENT	STRINGENT	STRINGENT	YES	YES	YES	YES	3'UTR,3'UTR	NO	3'UTR	3'UTR	Stop codon	3'UTR
AT4G25050	F4JRT7, Q9SW21	ACP4	ACP4, AtACP4	acyl carrier protein 4	STRINGENT	STRINGENT	N.A.	YES	YES	NO	NO	5'UTR,5'UTR,3'UTR,3'UTR	NO	3'UTR	3'UTR, 5'UTR	Stop codon	NO
AT4G25080	A0A1P8B4G1, Q9SW18, Q9SW18-2	CHLM	CHLM	magnesium-protoporphyrin IX methyltransferase	STRINGENT	STRINGENT	STRINGENT	YES	YES	YES	YES	3'UTR,3'UTR,3'UTR,3'UTR	NO	3'UTR	3'UTR, CDS	3' UTR	NO
AT4G25100	A0A178UVJ5, F4JRV2, P21276	FSD1	ATFSD1, FSD1	Fe superoxide dismutase 1	STRINGENT	STRINGENT	STRINGENT	YES	YES	YES	YES	3'UTR,3'UTR,3'UTR,3'UTR,3'UTR	NO	3'UTR	3'UTR, 5'UTR, CDS	Stop codon	NO
AT4G25130	P54150	PMSR4	MSRA4, PMSR4	peptide met sulfoxide reductase 4	STRINGENT	STRINGENT	STRINGENT	YES	YES	YES	YES	3'UTR	NO	3'UTR	3'UTR	Stop codon	3'UTR
AT4G25370	Q93WL3	AT4G25370	ClpT1	Double Clp-N motif protein	STRINGENT	STRINGENT	STRINGENT	YES	YES	YES	YES	3'UTR	NO	3'UTR	3'UTR	Stop codon	NO
AT4G25550	A0A178V2V2, Q8GXS3, Q8GXS3-2	AT4G25550		Cleavage/polyadenylation specificity factor, 25kDa subunit	STRINGENT	STRINGENT	STRINGENT	YES	YES	YES	YES	3'UTR	NO	3'UTR	3'UTR	3' UTR	3'UTR
AT4G25570	A0A178UZ09, Q8L856	ACYB-2	ACYB-2	Cytochrome b561/ferric reductase transmembrane protein family	STRINGENT	STRINGENT	STRINGENT	YES	YES	YES	YES	CDS,CDS,3'UTR,3'UTR	NO	3'UTR	3'UTR, CDS	Stop codon	3'UTR
AT4G25700	A0A178UUB0, Q9SZZ8, Q9SZZ8-2	BETA-OHASE 1	B1, BCH1, BETA-OHASE 1, chy1	beta-hydroxylase 1	STRINGENT	STRINGENT	N.A.	YES	NO	NO	NO	3'UTR,3'UTR	NO	3'UTR	3'UTR	NO	3'UTR
AT4G25740	A0A178UTJ5, F4JTD3, Q9SW09	AT4G25740		RNA binding Plectin/S10 domain-containing protein	STRINGENT	STRINGENT	STRINGENT	YES	YES	YES	YES	3'UTR,3'UTR	NO	3'UTR	3'UTR	NO	NO
AT4G25890	Q9SVZ6	AT4G25890		60S acidic ribosomal protein family	STRINGENT	STRINGENT	STRINGENT	YES	YES	YES	YES	3'UTR	3'UTR	NO	3'UTR	NO	3'UTR
AT4G25900	Q940G5	AT4G25900		Galactose mutarotase-like superfamily protein	STRINGENT	N.A.	STRINGENT	NO	NO	YES	YES	3'UTR	3'UTR	3'UTR	NO	Stop codon	NO
AT4G26110	B3H684, Q9SZI2	NAP1;1	ATNAP1;1, NAP1;1	nucleosome assembly protein1;1	STRINGENT	STRINGENT	STRINGENT	YES	YES	YES	YES	3'UTR,3'UTR	NO	3'UTR	3'UTR	Stop codon	CDS, 3'UTR
AT4G26300	A0A1P8B7W2, A0A1P8B7W5, A0A1P8B7W8, O23247, Q0WRJ6, Q7DLG4	emb1027	emb1027	Arginyl-tRNA synthetase, class Ic	STRINGENT	STRINGENT	STRINGENT	YES	NO	YES	YES	3'UTR	NO	3'UTR	3'UTR	Stop codon	3'UTR
AT4G26410	Q84K90	AT4G26410	RHIP1	chromosome-associated kinesin	STRINGENT	STRINGENT	STRINGENT	YES	YES	YES	YES	3'UTR	NO	3'UTR	3'UTR	Stop codon	3'UTR
AT4G26555	A0A1P8B636, A0A1P8B637, Q944B0	AT4G26555		FKBP-like peptidyl-prolyl cis-trans isomerase family protein	STRINGENT	STRINGENT	N.A.	YES	NO	NO	NO	3'UTR,3'UTR,3'UTR	NO	3'UTR	3'UTR	Stop codon	NO
AT4G26630	A0A178UVU2, Q0WSS7, Q8RWF6, Q9SUA1	AT4G26630	DEK3	DEK domain-containing chromatin associated protein	STRINGENT	STRINGENT	STRINGENT	YES	YES	YES	YES	3'UTR,3'UTR	NO	3'UTR	3'UTR	3' UTR, CDS	3'UTR
AT4G26710	Q9SZ13	AT4G26710		ATPase, V0 complex, subunit E	STRINGENT	STRINGENT	STRINGENT	YES	YES	YES	YES	3'UTR,3'UTR	NO	3'UTR	3'UTR	Stop codon	3'UTR
AT4G26840	P55852	SUMO1	ATSUMO1, SUM1, SUMO 1, SUMO1	small ubiquitin-like modifier 1	STRINGENT	STRINGENT	STRINGENT	YES	YES	YES	YES	3'UTR	NO	3'UTR	3'UTR	3' UTR	3'UTR
AT4G26850	Q8RWE8	VTC2	GGP, VTC2	GDP-L-galactose phosphorylase 1	STRINGENT	STRINGENT	STRINGENT	YES	NO	YES	NO	3'UTR	3'UTR	3'UTR	3'UTR	Stop codon	NO
AT4G26910	Q8H107, Q8H107-2, Q8H107-3	AT4G26910		Dihydrolipoamide succinyltransferase	STRINGENT	STRINGENT	STRINGENT	YES	NO	YES	YES	3'UTR,3'UTR,3'UTR	NO	3'UTR	NO	Stop codon	3'UTR
AT4G26970	Q94A28	ACO2	ACO2	aconitase 2	STRINGENT	STRINGENT	STRINGENT	YES	NO	YES	YES	3'UTR	3'UTR	3'UTR	3'UTR	Stop codon	3'UTR
AT4G27000	Q93W34	ATRBP45C	ATRBP45C	RNA-binding (RRM/RBD/RNP motifs) family protein	STRINGENT	STRINGENT	STRINGENT	YES	YES	YES	YES	3'UTR	NO	3'UTR	3'UTR	Stop codon	3'UTR
AT4G27090	A0A178UVK7, Q9T043	AT4G27090		Ribosomal protein L14	STRINGENT	STRINGENT	STRINGENT	YES	YES	YES	YES	5'UTR,CDS,3'UTR	NO	3'UTR	3'UTR, CDS	Stop codon	NO
AT4G27130	P41568	AT4G27130		Translation initiation factor SUI1 family protein	STRINGENT	STRINGENT	STRINGENT	YES	YES	YES	YES	3'UTR	3'UTR	3'UTR	3'UTR	Stop codon	3'UTR
AT4G27320	Q8L4N1, Q8L4N1-2	PHOS34	ATPHOS34, PHOS34	Adenine nucleotide alpha hydrolases-like superfamily protein	STRINGENT	STRINGENT	STRINGENT	YES	YES	YES	YES	3'UTR,3'UTR	NO	3'UTR	3'UTR	3' UTR	3'UTR
AT4G27500	A0A178UT56, O23144, Q56ZW7	PPI1	PPI1	proton pump interactor 1	STRINGENT	STRINGENT	STRINGENT	YES	YES	YES	YES	CDS,3'UTR	NO	3'UTR	3'UTR	CDS, Stop codon	NO
AT4G27800	P49599, P49599-2, P49599-3	TAP38	PPH1, TAP38	thylakoid-associated phosphatase 38	STRINGENT	STRINGENT	STRINGENT	YES	YES	YES	NO	3'UTR,3'UTR,3'UTR	NO	3'UTR	3'UTR, CDS	Stop codon	3'UTR
AT4G27960	F4JKF3, P35132, P35132-2	UBC9	UBC9	ubiquitin conjugating enzyme 9	STRINGENT	STRINGENT	STRINGENT	YES	YES	YES	YES	3'UTR,3'UTR	NO	3'UTR	3'UTR	NO	NO
AT4G28025	F4JKG2, Q9C5F3, Q9SUD7	AT4G28025		hypothetical protein	STRINGENT	STRINGENT	N.A.	YES	NO	NO	NO	3'UTR,3'UTR	StopCodon, CDS	3'UTR	3'UTR	NO	3'UTR
AT4G28060	Q9SUD3	AT4G28060		Cytochrome c oxidase, subunit Vib family protein	STRINGENT	STRINGENT	STRINGENT	YES	YES	YES	YES	3'UTR	NO	3'UTR	3'UTR	Stop codon	NO
AT4G28540	Q8LPJ1	CKL6	CKL6, PAPK1	casein kinase I-like 6	STRINGENT	STRINGENT	STRINGENT	YES	YES	YES	YES	3'UTR	NO	3'UTR	3'UTR	NO	NO
AT4G28660	A0A178UXI3, F4JM05, Q8W0Y8	PSB28	PSB28	photosystem II reaction center PSB28 protein	STRINGENT	STRINGENT	N.A.	YES	YES	NO	NO	3'UTR,3'UTR	NO	NO	3'UTR	Stop codon	NO
AT4G28750	Q7FY22, Q8H127, Q9S831	PSAE-1	PSAE-1	Photosystem I reaction centre subunit IV / PsaE protein	STRINGENT	STRINGENT	STRINGENT	YES	YES	NO	YES	3'UTR	NO	3'UTR	3'UTR, CDS, 5'UTR	Stop codon	NO
AT4G28770	F4JM26, Q9SVU4	AT4G28770		Tetraspanin family protein	STRINGENT	STRINGENT	STRINGENT	YES	NO	YES	YES	3'UTR,3'UTR	3'UTR	3'UTR	3'UTR	3' UTR	3'UTR
AT4G29010	Q570E1, Q9ZPI6	AIM1	AIM1	Enoyl-CoA hydratase/isomerase family	STRINGENT	STRINGENT	STRINGENT	YES	YES	YES	YES	3'UTR	NO	3'UTR	3'UTR	Stop codon	3'UTR
AT4G29040	Q9SZD4	RPT2a	RPT2a	regulatory particle AAA-ATPase 2A	STRINGENT	STRINGENT	STRINGENT	YES	NO	NO	YES	3'UTR	NO	3'UTR	3'UTR	CDS, Stop codon	3'UTR
AT4G29060	F4JMU5, Q93ZG6, Q9SZD6	emb2726	emb2726	elongation factor Ts family protein	STRINGENT	STRINGENT	STRINGENT	YES	YES	YES	YES	3'UTR,3'UTR	3'UTR, CDS	3'UTR	3'UTR	NO	NO
AT4G29160	Q9SZE4, Q9SZE4-2	SNF7.1	SNF7.1	SNF7 family protein	STRINGENT	STRINGENT	STRINGENT	YES	YES	YES	YES	3'UTR,3'UTR,3'UTR	NO	3'UTR	3'UTR	coding_intron, Stop codon	3'UTR
AT4G29220	A0A178UVZ6, Q9M0F9	PFK1	PFK1	phosphofructokinase 1	STRINGENT	STRINGENT	STRINGENT	YES	NO	YES	NO	3'UTR	3'UTR	3'UTR	3'UTR	3' UTR	3'UTR
AT4G29350	Q42418	PFN2	AtPRF2, PFN2, PRF2, PRO2	profilin 2	STRINGENT	STRINGENT	STRINGENT	YES	YES	YES	YES	3'UTR	NO	3'UTR	3'UTR, 5'UTR	NO	NO
AT4G29390	P49689	AT4G29390		Ribosomal protein S30 family protein	STRINGENT	STRINGENT	STRINGENT	YES	YES	YES	YES	3'UTR	NO	3'UTR	3'UTR	Stop codon	3'UTR
AT4G29410	Q9M0E2	AT4G29410		Ribosomal L28e protein family	STRINGENT	STRINGENT	STRINGENT	YES	YES	YES	YES	3'UTR,3'UTR	3'UTR	3'UTR	3'UTR	Stop codon	3'UTR
AT4G29480	Q9M0D5	AT4G29480		Mitochondrial ATP synthase subunit G protein	STRINGENT	STRINGENT	STRINGENT	YES	YES	YES	YES	3'UTR	NO	3'UTR	3'UTR	Stop codon	3'UTR
AT4G29590	Q94JR4, Q9SU88	AT4G29590		S-adenosyl-L-methionine-dependent methyltransferases superfamily protein	STRINGENT	STRINGENT	N.A.	YES	NO	NO	NO	3'UTR	NO	3'UTR	3'UTR	Stop codon	3'UTR
AT4G29735	F4JNQ9, Q8LCF2	AT4G29735		transmembrane protein	STRINGENT	STRINGENT	STRINGENT	YES	YES	YES	YES	CDS,CDS,3'UTR,3'UTR	NO	3'UTR	3'UTR	Stop codon	3'UTR
AT4G29810	B3H757, C0Z2L0, Q9S7U9, Q9S7U9-2	MKK2	ATMKK2, MK1, MKK2	MAP kinase kinase 2	STRINGENT	STRINGENT	STRINGENT	YES	YES	YES	YES	3'UTR,3'UTR,3'UTR	NO	3'UTR	3'UTR	NO	NO
AT4G29900	Q0WPI8, Q9SZR1	ACA10	ACA10, ATACA10, CIF1	autoinhibited Ca(2 )-ATPase 10	STRINGENT	STRINGENT	STRINGENT	YES	NO	YES	YES	3'UTR	3'UTR	3'UTR	3'UTR	Stop codon	3'UTR
AT4G30010	Q9SZV4	AT4G30010		ATP-dependent RNA helicase	STRINGENT	STRINGENT	STRINGENT	YES	YES	YES	YES	3'UTR	NO	3'UTR	3'UTR	3' UTR	3'UTR
AT4G30190	F4JPJ7, P19456	HA2	AHA2, AtHA2, HA2, PMA2	H[ ]-ATPase 2	STRINGENT	STRINGENT	STRINGENT	YES	YES	YES	YES	3'UTR,3'UTR	NO	3'UTR	NO	NO	NO
AT4G30200	Q9SUM4, Q9SUM4-2, Q9SUM4-3, Q9SUM4-4	VEL1	VEL1, VIL2	vernalization5/VIN3-like protein	STRINGENT	N.A.	STRINGENT	NO	NO	YES	NO	3'UTR,3'UTR,3'UTR,3'UTR	3'UTR, 5'UTR	3'UTR	3'UTR	NO	3'UTR
AT4G30210	A0A1P8B3S1, Q93VX3, Q9SUM3, Q9SUM3-2	ATR2	AR2, ATR2	P450 reductase 2	STRINGENT	STRINGENT	STRINGENT	YES	YES	YES	YES	3'UTR,3'UTR,3'UTR	CDS	3'UTR	3'UTR	Stop codon	NO
AT4G30220	F4JPK5, Q9SUM2	RUXF	RUXF, SMFA	small nuclear ribonucleoprotein F	STRINGENT	STRINGENT	STRINGENT	YES	YES	YES	YES	3'UTR,3'UTR	3'UTR	3'UTR	3'UTR	Stop codon	3'UTR
AT4G30530	Q9M0A7	GGP1	GGP1	Class I glutamine amidotransferase-like superfamily protein	STRINGENT	STRINGENT	STRINGENT	YES	YES	YES	YES	3'UTR	NO	3'UTR	3'UTR	NO	NO
AT4G30600	Q9M0A0	AT4G30600		signal recognition particle receptor alpha subunit family protein	STRINGENT	STRINGENT	STRINGENT	YES	YES	YES	YES	3'UTR,3'UTR	NO	3'UTR	3'UTR	NO	3'UTR
AT4G30620	Q9M098	AT4G30620	STCL	Putative BCR, YbaB family COG0718	STRINGENT	STRINGENT	STRINGENT	YES	YES	YES	YES	3'UTR	NO	3'UTR	3'UTR	NO	3'UTR
AT4G30950	P46312	FAD6	FAD6, FADC, SFD4	fatty acid desaturase 6	STRINGENT	STRINGENT	STRINGENT	YES	YES	YES	YES	3'UTR	NO	3'UTR	3'UTR	Stop codon	3'UTR
AT4G30993	A0A1P8B4D1, A0JQ76, Q8GW42	AT4G30993		Calcineurin-like metallo-phosphoesterase superfamily protein	STRINGENT	STRINGENT	N.A.	YES	NO	NO	NO	3'UTR,3'UTR,3'UTR	3'UTR	3'UTR	3'UTR	3' UTR	3'UTR
AT4G31040	O65546, Q681Z5, Q8RXP7	AT4G31040		CemA-like proton extrusion protein-like protein	STRINGENT	STRINGENT	STRINGENT	YES	YES	YES	YES	3'UTR	NO	3'UTR	3'UTR	3' UTR, Stop codon	NO
AT4G31130	Q9M089	AT4G31130		keratin-associated protein (DUF1218)	STRINGENT	N.A.	STRINGENT	NO	NO	YES	NO	3'UTR	NO	NO	3'UTR	NO	NO
AT4G31180	Q9M084	AT4G31180	IBI1	Class II aminoacyl-tRNA and biotin synthetases superfamily protein	STRINGENT	STRINGENT	STRINGENT	YES	YES	YES	YES	3'UTR,3'UTR	NO	3'UTR	3'UTR	Stop codon	3'UTR
AT4G31300	F4JRY2, Q8LD27	PBA1	PBA1	N-terminal nucleophile aminohydrolases (Ntn hydrolases) superfamily protein	STRINGENT	STRINGENT	STRINGENT	YES	YES	YES	YES	3'UTR,3'UTR,3'UTR	NO	3'UTR	3'UTR	Stop codon	NO
AT4G31310	A0A178UWU9, A2RVS4	AT4G31310		AIG2-like (avirulence induced gene) family protein	STRINGENT	STRINGENT	STRINGENT	YES	NO	YES	NO	3'UTR,3'UTR	3'UTR	3'UTR	3'UTR	Stop codon	3'UTR
AT4G31340	F4JRY9, Q8GUN1	AT4G31340		myosin heavy chain-like protein	STRINGENT	STRINGENT	STRINGENT	YES	YES	YES	YES	3'UTR,3'UTR	NO	3'UTR	3'UTR	3' UTR	3'UTR
AT4G31390	A0A1P8B7P6, Q8RWG1, Q8RWG1-2	ACDO1	ABC1K1, ACDO1, AtACDO1, PGR6	Protein kinase superfamily protein	STRINGENT	STRINGENT	N.A.	YES	NO	NO	NO	3'UTR,3'UTR,3'UTR	NO	3'UTR	3'UTR	NO	3'UTR
AT4G31480	A0A178UXB8, A0A178V6Q4, A0A1P8B4C2, Q9SV21	AT4G31480		Coatomer, beta subunit	STRINGENT	STRINGENT	STRINGENT	YES	YES	YES	YES	3'UTR,3'UTR,3'UTR,3'UTR,3'UTR,3'UTR,3'UTR,3'UTR,3'UTR	NO	3'UTR	3'UTR	NO	3'UTR
AT4G31490	Q9SV20	AT4G31490		Coatomer, beta subunit	STRINGENT	STRINGENT	STRINGENT	YES	NO	YES	YES	3'UTR,3'UTR,3'UTR	3'UTR	CDS, 3'UTR	3'UTR	3' UTR	NO
AT4G31700	A8MS03, O48549	RPS6	AtRPS6, RPS6, RPS6A	ribosomal protein S6	STRINGENT	STRINGENT	STRINGENT	YES	YES	YES	YES	3'UTR,3'UTR	NO	3'UTR	3'UTR	Stop codon	NO
AT4G31780	A0A1P8B6W3, A0A2H1ZEP5, O81770, O81770-2	MGD1	EMB2797, MGD1, MGDA, UGT81A1	monogalactosyl diacylglycerol synthase 1	STRINGENT	STRINGENT	N.A.	YES	NO	NO	NO	3'UTR,3'UTR,3'UTR	NO	3'UTR	CDS, 3'UTR	Stop codon	3'UTR
AT4G31985	A0A178V6D9, P51424	AT4G31985		Ribosomal protein L39 family protein	STRINGENT	STRINGENT	STRINGENT	YES	YES	YES	YES	3'UTR	NO	3'UTR	3'UTR, 5'UTR	Stop codon	NO
AT4G31990	B9DG21, F4JTH0, P46248	ASP5	AAT3, ASP5, ATAAT1	aspartate aminotransferase 5	STRINGENT	STRINGENT	STRINGENT	YES	YES	YES	YES	3'UTR,3'UTR,3'UTR,3'UTR,3'UTR,CDS,3'UTR	NO	3'UTR, CDS	3'UTR, CDS	coding_intron	3'UTR
AT4G32130	Q8VY97	AT4G32130		ER membrane protein complex subunit-like protein (DUF2012)	STRINGENT	STRINGENT	STRINGENT	YES	YES	YES	YES	3'UTR	NO	3'UTR	3'UTR	3' UTR	3'UTR
AT4G32150	O49377	VAMP711	ATVAMP711, VAMP711	vesicle-associated membrane protein 711	STRINGENT	STRINGENT	STRINGENT	YES	YES	YES	YES	3'UTR	CDS, 3'UTR	3'UTR	3'UTR	Stop codon	3'UTR
AT4G32240	O49366, Q8LBW4	AT4G32240		hypothetical protein	STRINGENT	N.A.	STRINGENT	NO	NO	NO	YES	3'UTR	NO	3'UTR	3'UTR	NO	3'UTR
AT4G32260	Q42139	PDE334	PDE334	ATPase, F0 complex, subunit B/B', bacterial/chloroplast	STRINGENT	STRINGENT	N.A.	YES	NO	NO	NO	CDS,3'UTR	CDS	3'UTR	3'UTR, CDS, 5'UTR	NO	NO
AT4G32410	O48946	CESA1	ANY1, AtCESA1, CESA1, RSW1	cellulose synthase 1	STRINGENT	STRINGENT	STRINGENT	YES	YES	YES	YES	CDS,3'UTR	NO	3'UTR	3'UTR	3' UTR	3'UTR
AT4G32470	F4JUC2, Q9SUU5	AT4G32470		Cytochrome bd ubiquinol oxidase, 14kDa subunit	STRINGENT	STRINGENT	STRINGENT	YES	YES	YES	YES	3'UTR,3'UTR	NO	3'UTR	3'UTR	Stop codon	3'UTR
AT4G32530	B3H4N3, Q9SZY7	AT4G32530		ATPase, F0/V0 complex, subunit C protein	STRINGENT	STRINGENT	STRINGENT	YES	YES	YES	YES	3'UTR,3'UTR	NO	3'UTR	3'UTR	Stop codon	NO
AT4G32640	Q9M081	AT4G32640		Sec23/Sec24 protein transport family protein	STRINGENT	N.A.	STRINGENT	NO	NO	YES	NO	3'UTR,3'UTR	3'UTR	3'UTR	3'UTR	NO	3'UTR
AT4G32915	F4JV80	AT4G32915		glutamyl-tRNA(Gln) amidotransferase subunit C	STRINGENT	STRINGENT	STRINGENT	YES	YES	YES	YES	3'UTR	3'UTR	3'UTR	3'UTR	3' UTR	3'UTR
AT4G33010	B3H5Y8, Q94B78	GLDP1	AtGLDP1, GLDP1	glycine decarboxylase P-protein 1	STRINGENT	STRINGENT	STRINGENT	YES	NO	YES	NO	3'UTR,3'UTR	NO	3'UTR	3'UTR, CDS	Stop codon	NO
AT4G33090	Q8VZH2	APM1	APM1, ATAPM1	aminopeptidase M1	STRINGENT	STRINGENT	STRINGENT	YES	NO	YES	YES	3'UTR	NO	3'UTR	3'UTR	Stop codon	3'UTR
AT4G33250	Q8LPR7, Q9SZA3	EIF3K	ATTIF3K1, EIF3K, TIF3K1	eukaryotic translation initiation factor 3K	STRINGENT	STRINGENT	STRINGENT	YES	YES	YES	YES	3'UTR	NO	3'UTR	3'UTR	Stop codon	3'UTR
AT4G33360	A0A178US90, B3H6K6, F4JIW8, Q9SZB3	FLDH	FLDH	NAD(P)-binding Rossmann-fold superfamily protein	STRINGENT	STRINGENT	STRINGENT	YES	NO	YES	YES	3'UTR,3'UTR,3'UTR	3'UTR	NO	NO	Stop codon	NO
AT4G33380	F4JIX3, Q8VZI6, Q9SZB5	AT4G33380		dimethylallyl, adenosine tRNA methylthiotransferase	STRINGENT	STRINGENT	STRINGENT	YES	YES	YES	YES	3'UTR,3'UTR	3'UTR	3'UTR	3'UTR	3' UTR	3'UTR
AT4G33510	F4JIZ3, Q00218	DHS2	AtDAHP2, DAHP2, DHS2	3-deoxy-d-arabino-heptulosonate 7-phosphate synthase	STRINGENT	STRINGENT	STRINGENT	YES	YES	YES	YES	3'UTR,3'UTR	NO	3'UTR	3'UTR	Stop codon	3'UTR
AT4G33580	Q94CE3, Q94CE3-2	BCA5	ATBCA5, BCA5	beta carbonic anhydrase 5	STRINGENT	STRINGENT	STRINGENT	YES	NO	YES	YES	3'UTR,3'UTR	NO	3'UTR	3'UTR	NO	NO
AT4G33625	A0A384KXN1, B3H5F4, Q8GXK1	AT4G33625		vacuole protein	STRINGENT	STRINGENT	N.A.	YES	NO	NO	NO	3'UTR,3'UTR,3'UTR	3'UTR	3'UTR	3'UTR	Stop codon	3'UTR
AT4G33680	Q93ZN9	AGD2	AGD2	Pyridoxal phosphate (PLP)-dependent transferases superfamily protein	STRINGENT	STRINGENT	STRINGENT	YES	YES	YES	YES	3'UTR	NO	3'UTR	3'UTR	Stop codon	3'UTR
AT4G33865	Q680P8	AT4G33865		Ribosomal protein S14p/S29e family protein	STRINGENT	STRINGENT	STRINGENT	YES	YES	YES	YES	5'UTR,CDS,3'UTR	NO	3'UTR	3'UTR, 5'UTR	NO	3'UTR
AT4G34100	F4JKK0, F4JKK0-2, Q8GXC3	CER9	CER9, SUD1	RING/U-box superfamily protein	STRINGENT	STRINGENT	STRINGENT	YES	NO	YES	NO	3'UTR,3'UTR	NO	3'UTR	3'UTR	NO	NO
AT4G34110	P42731, Q56WH9	2	ATPAB2, PAB2, PABP2	poly(A) binding protein 2	STRINGENT	STRINGENT	STRINGENT	YES	YES	YES	YES	5'UTR,3'UTR	NO	3'UTR	3'UTR	Stop codon	NO
AT4G34120	Q9C5D0	LEJ1	CBSX2, CDCP1, LEJ1	Cystathionine beta-synthase (CBS) family protein	STRINGENT	STRINGENT	STRINGENT	YES	YES	YES	NO	3'UTR	NO	3'UTR	3'UTR	NO	NO
AT4G34150	Q945K9	AT4G34150		Calcium-dependent lipid-binding (CaLB domain) family protein	STRINGENT	N.A.	STRINGENT	NO	NO	YES	YES	3'UTR	NO	3'UTR	3'UTR	NO	NO
AT4G34180	Q93V74	AT4G34180	CYCLASE1	Cyclase family protein	STRINGENT	STRINGENT	STRINGENT	YES	YES	YES	YES	3'UTR	NO	3'UTR	3'UTR	Stop codon	3'UTR
AT4G34190	Q9M7I9	SEP1	SEP1	stress enhanced protein 1	STRINGENT	STRINGENT	N.A.	YES	YES	NO	NO	3'UTR	NO	3'UTR, CDS	3'UTR	Stop codon	NO
AT4G34200	O49485, Q56WY7	EDA9	EDA9, PGDH1	D-3-phosphoglycerate dehydrogenase	STRINGENT	STRINGENT	STRINGENT	YES	YES	YES	YES	3'UTR	3'UTR, CDS	3'UTR	NO	NO	NO
AT4G34215	Q8L9J9	AT4G34215		carbohydrate esterase, putative (DUF303)	STRINGENT	STRINGENT	STRINGENT	YES	NO	YES	NO	3'UTR	3'UTR	NO	3'UTR	NO	3'UTR
AT4G34265	A0A1P8B754, Q67Y22, Q8LC44	AT4G34265		hypothetical protein	STRINGENT	STRINGENT	STRINGENT	YES	YES	YES	YES	3'UTR,3'UTR,3'UTR,3'UTR,3'UTR	3'UTR	3'UTR	3'UTR	Stop codon	3'UTR
AT4G34350	Q94B35	HDR	CLB6, HDR, ISPH	4-hydroxy-3-methylbut-2-enyl diphosphate reductase	STRINGENT	STRINGENT	STRINGENT	YES	NO	YES	NO	3'UTR	NO	3'UTR	3'UTR, CDS	Stop codon	3'UTR
AT4G34450	Q0WW26	AT4G34450		coatomer gamma-2 subunit, putative / gamma-2 coat protein, putative / gamma-2 COP	STRINGENT	STRINGENT	STRINGENT	YES	YES	YES	YES	3'UTR	CDS	3'UTR	3'UTR	Stop codon	3'UTR
AT4G34460	A8MR96, F4JLD1, F4JLD2, P49177, Q5PNT1	AGB1	AGB1, ATAGB1, ELK4	GTP binding protein beta 1	STRINGENT	STRINGENT	STRINGENT	YES	YES	YES	NO	3'UTR,3'UTR,3'UTR,3'UTR	NO	3'UTR	3'UTR	NO	NO
AT4G34490	A0A1P8B7W9, O65902	CAP1	ATCAP1, CAP 1, CAP1	cyclase associated protein 1	STRINGENT	STRINGENT	STRINGENT	YES	YES	YES	YES	3'UTR,3'UTR	3'UTR	3'UTR	NO	3' UTR	3'UTR
AT4G34620	O65686	SSR16	SSR16	small subunit ribosomal protein 16	STRINGENT	STRINGENT	STRINGENT	YES	YES	YES	YES	3'UTR	NO	3'UTR	3'UTR, 5'UTR, CDS	Stop codon	NO
AT4G34640	A0A1P8B8L3, P53799	SQS1	ERG9, SQS1	squalene synthase 1	STRINGENT	STRINGENT	STRINGENT	YES	YES	YES	YES	3'UTR,3'UTR	NO	3'UTR	3'UTR	Stop codon	3'UTR
AT4G34670	Q42262	AT4G34670		Ribosomal protein S3Ae	STRINGENT	STRINGENT	STRINGENT	YES	YES	YES	YES	3'UTR	NO	3'UTR	3'UTR	Stop codon	NO
AT4G34700	Q945M1	CIB22	AtCIB22, CIB22	LYR family of Fe/S cluster biogenesis protein	STRINGENT	STRINGENT	STRINGENT	YES	YES	YES	YES	3'UTR	NO	3'UTR	3'UTR	Stop codon, 3' UTR	3'UTR
AT4G34720	A0A1P8B7X4, P0DH93	AVA-P1	ATVHA-C1, AVA-P1, VHA-C1	ATPase, F0/V0 complex, subunit C protein	STRINGENT	STRINGENT	STRINGENT	YES	YES	YES	YES	3'UTR,3'UTR	NO	3'UTR	3'UTR	Stop codon	NO
AT4G35000	Q42564	APX3	APX3	ascorbate peroxidase 3	STRINGENT	STRINGENT	STRINGENT	YES	NO	YES	YES	3'UTR	NO	3'UTR	3'UTR	Stop codon	3'UTR
AT4G35090	A0A1P8B564, F4JM86, P25819	CAT2	CAT2	catalase 2	STRINGENT	STRINGENT	STRINGENT	YES	YES	YES	YES	3'UTR,3'UTR,3'UTR	NO	3'UTR	3'UTR, 5'UTR, CDS	3' UTR	NO
AT4G35100	P93004	PIP3	PIP2;7, PIP3, PIP3A, SIMIP	plasma membrane intrinsic protein 3	STRINGENT	STRINGENT	STRINGENT	NO	YES	NO	YES	3'UTR,3'UTR,3'UTR	3'UTR	3'UTR	3'UTR, 5'UTR, CDS	NO	NO
AT4G35250	O65502	HCF244	HCF244	NAD(P)-binding Rossmann-fold superfamily protein	STRINGENT	STRINGENT	N.A.	YES	YES	NO	NO	3'UTR	NO	3'UTR	3'UTR	Stop codon	NO
AT4G35260	Q8LFC0	IDH1	IDH-I, IDH1	isocitrate dehydrogenase 1	STRINGENT	STRINGENT	STRINGENT	YES	YES	YES	YES	3'UTR	NO	3'UTR	NO	Stop codon	NO
AT4G35360	A0A1P8B493, Q8W4Q1	AT4G35360		pantothenate kinase	STRINGENT	N.A.	STRINGENT	NO	NO	YES	NO	3'UTR,3'UTR,3'UTR	NO	3'UTR	3'UTR	NO	3'UTR
AT4G35450	A0A178V4X8, F4JN13, F4JN17, Q9SAR5	AKR2	AFT, AKR2, AKR2A	ankyrin repeat-containing protein 2	STRINGENT	STRINGENT	STRINGENT	YES	YES	YES	YES	3'UTR,3'UTR,3'UTR,3'UTR,3'UTR	3'UTR	3'UTR	3'UTR	Stop codon	NO
AT4G35490	Q9SVW7	MRPL11	MRPL11	mitochondrial ribosomal protein L11	STRINGENT	STRINGENT	STRINGENT	YES	YES	YES	YES	3'UTR	3'UTR	3'UTR	3'UTR	NO	NO
AT4G35800	P18616	NRPB1	NRPB1, RNA_POL_II_LS, RNA_POL_II_LSRNA_POL_II_LS, RPB1	RNA polymerase II large subunit	STRINGENT	N.A.	STRINGENT	NO	NO	YES	NO	3'UTR	NO	3'UTR	3'UTR	3' UTR, CDS	NO
AT4G35830	B3H5Y0, Q42560	ACO1	ACO1	aconitase 1	STRINGENT	STRINGENT	STRINGENT	YES	NO	YES	YES	3'UTR,3'UTR	NO	3'UTR, CDS	3'UTR, CDS	Stop codon	3'UTR
AT4G36130	Q42064	AT4G36130		Ribosomal protein L2 family	STRINGENT	STRINGENT	STRINGENT	YES	YES	YES	YES	3'UTR	3'UTR	3'UTR	3'UTR	NO	3'UTR
AT4G36195	Q683F9, Q94CC6	AT4G36195		Serine carboxypeptidase S28 family protein	STRINGENT	STRINGENT	STRINGENT	YES	YES	YES	YES	3'UTR,3'UTR,3'UTR	3'UTR, StopCodon, CDS	3'UTR	3'UTR	Stop codon	3'UTR
AT4G36390	Q8H0V1	AT4G36390		Methylthiotransferase	STRINGENT	STRINGENT	N.A.	YES	NO	NO	NO	3'UTR	3'UTR	3'UTR	3'UTR	NO	NO
AT4G36730	P42774, P42774-2	GBF1	AtGBF1, GBF1	G-box binding factor 1	STRINGENT	STRINGENT	STRINGENT	YES	NO	YES	NO	3'UTR,3'UTR	5'UTR, 3'UTR	3'UTR	3'UTR	Stop codon	NO
AT4G36800	Q9SDY5, Q9SDY5-2	RCE1	RCE1	RUB1 conjugating enzyme 1	STRINGENT	STRINGENT	STRINGENT	YES	YES	YES	YES	3'UTR,3'UTR	NO	3'UTR	3'UTR	Stop codon	3'UTR
AT4G37200	O23166	HCF164	HCF164	Thioredoxin superfamily protein	STRINGENT	STRINGENT	N.A.	YES	YES	NO	NO	3'UTR	NO	NO	3'UTR	Stop codon	NO
AT4G37760	Q8VYH2	SQE3	SQE3	squalene epoxidase 3	STRINGENT	STRINGENT	STRINGENT	YES	YES	YES	NO	3'UTR	3'UTR	3'UTR	3'UTR	Stop codon	3'UTR
AT4G37830	A0A1P8B847, F4JSU5, Q9T070	AT4G37830		cytochrome c oxidase-like protein	STRINGENT	STRINGENT	STRINGENT	YES	YES	YES	YES	3'UTR,3'UTR,3'UTR,CDS,3'UTR	NO	3'UTR, CDS	3'UTR, 5'UTR	Stop codon	3'UTR
AT4G37930	Q9SZJ5	SHM1	SHM1, SHMT1, STM	serine transhydroxymethyltransferase 1	STRINGENT	STRINGENT	STRINGENT	YES	YES	YES	NO	3'UTR	NO	3'UTR, CDS	3'UTR, CDS	Stop codon	NO
AT4G38130	A8MSD0, O22446	HD1	ATHD1, ATHDA19, HD1, HDA1, HDA19, RPD3A	histone deacetylase 1	STRINGENT	STRINGENT	STRINGENT	YES	YES	YES	YES	3'UTR,3'UTR	3'UTR	3'UTR	3'UTR	Stop codon	NO
AT4G38510	F4JTQ0, Q9SZN1	VAB2	AtVAB2, VAB2	ATPase, V1 complex, subunit B protein	STRINGENT	STRINGENT	STRINGENT	YES	YES	YES	YES	3'UTR,3'UTR,3'UTR,3'UTR	NO	3'UTR	3'UTR	3' UTR	3'UTR
AT4G38600	B3H700, Q6WWW4	KAK	KAK, UPL3	HECT ubiquitin protein ligase family protein KAK	STRINGENT	STRINGENT	STRINGENT	YES	NO	YES	YES	3'UTR,3'UTR,3'UTR	CDS, 3'UTR	3'UTR	3'UTR	3' UTR, TSS	3'UTR
AT4G38630	P55034, Q56Z34	RPN10	ATMCB1, MBP1, MCB1, RPN10	regulatory particle non-ATPase 10	STRINGENT	STRINGENT	STRINGENT	YES	YES	YES	YES	3'UTR	NO	3'UTR	3'UTR	Stop codon	3'UTR
AT4G38800	Q9T0I8	MTN1	ATMTAN1, ATMTN1, MTAN1, MTN1	methylthioadenosine nucleosidase 1	STRINGENT	STRINGENT	STRINGENT	YES	YES	YES	YES	3'UTR	3'UTR	3'UTR, CDS	3'UTR	Stop codon	3'UTR
AT4G38920	A0A1P8B937, P0DH93	VHA-C3	ATVHA-C3, AVA-P3, VHA-C3	vacuolar-type H[ ]-ATPase C3	STRINGENT	STRINGENT	STRINGENT	YES	YES	YES	YES	3'UTR,3'UTR	NO	3'UTR	3'UTR	3' UTR	3'UTR
AT4G38970	F4JUJ5, Q944G9	FBA2	AtFBA2, FBA2	fructose-bisphosphate aldolase 2	STRINGENT	STRINGENT	N.A.	YES	YES	NO	NO	3'UTR,3'UTR	NO	3'UTR, CDS	3'UTR, CDS, 5'UTR	NO	NO
AT4G39080	Q8W4S4	VHA-A3	VHA-A3	vacuolar proton ATPase A3	STRINGENT	STRINGENT	STRINGENT	YES	YES	YES	YES	3'UTR	CDS, 3'UTR	3'UTR	3'UTR	3' UTR	3'UTR
AT4G39090	P43296	RD19	RD19, RD19A	Papain family cysteine protease	STRINGENT	STRINGENT	STRINGENT	YES	NO	YES	NO	3'UTR	NO	3'UTR	3'UTR, 5'UTR, CDS	NO	NO
AT4G39200	B3H4B6, C0Z3A5, Q9T029	AT4G39200		Ribosomal protein S25 family protein	STRINGENT	STRINGENT	STRINGENT	YES	YES	YES	YES	5'UTR,5'UTR,3'UTR,3'UTR	NO	3'UTR	3'UTR, 5'UTR	Stop codon	NO
AT4G39520	Q9SVA6	AT4G39520	Drg1-1	GTP-binding protein-like protein	STRINGENT	STRINGENT	STRINGENT	YES	YES	YES	YES	3'UTR	CDS	3'UTR	3'UTR	NO	3'UTR
AT4G39710	F4JW56, Q9SCY3	PnsL4	FKBP16-2, PnsL4	FK506-binding protein 16-2	STRINGENT	STRINGENT	N.A.	YES	YES	NO	NO	3'UTR	3'UTR	3'UTR	3'UTR	Stop codon	3'UTR
AT4G40030	A8MRL0, P59169	AT4G40030	H3.3, HTR4	Histone superfamily protein	STRINGENT	STRINGENT	STRINGENT	YES	YES	YES	YES	3'UTR,3'UTR,3'UTR,3'UTR	NO	3'UTR	3'UTR	NO	NO
AT5G01010	C0Z286, C0Z3K8, F4K7W4, F4K7W6, Q8GSG8	AT5G01010		retinal-binding protein	STRINGENT	STRINGENT	STRINGENT	YES	YES	YES	YES	3'UTR,3'UTR,3'UTR,3'UTR,3'UTR,3'UTR,3'UTR	NO	3'UTR	3'UTR	Stop codon	3'UTR
AT5G01020	Q8GXZ3	AT5G01020		Protein kinase superfamily protein	STRINGENT	STRINGENT	STRINGENT	YES	YES	YES	YES	3'UTR	3'UTR	3'UTR	3'UTR	Stop codon	NO
AT5G01350	Q93W37, Q9M037	AT5G01350		UvrABC system C protein	STRINGENT	STRINGENT	STRINGENT	YES	YES	YES	YES	3'UTR	NO	3'UTR	3'UTR	3' UTR	NO
AT5G01530	Q07473	LHCB4.1	LHCB4.1	light harvesting complex photosystem II	STRINGENT	STRINGENT	STRINGENT	YES	YES	YES	YES	3'UTR	NO	3'UTR	3'UTR, 5'UTR, CDS	NO	NO
AT5G01650	A0A1P8B982, F4K9G5, Q9M011	AT5G01650		Tautomerase/MIF superfamily protein	STRINGENT	STRINGENT	N.A.	YES	NO	NO	NO	3'UTR,3'UTR,3'UTR,3'UTR	NO	3'UTR	3'UTR	Stop codon	3'UTR
AT5G01800	Q9LZW6	AT5G01800		saposin B domain-containing protein	STRINGENT	N.A.	STRINGENT	NO	NO	YES	NO	3'UTR	NO	3'UTR	3'UTR	Stop codon	3'UTR
AT5G02120	O81208	OHP	OHP, OHP1, PDE335	one helix protein	STRINGENT	STRINGENT	N.A.	YES	YES	NO	NO	3'UTR	NO	3'UTR	3'UTR, 5'UTR	Stop codon	NO
AT5G02240	Q94EG6	AT5G02240		NAD(P)-binding Rossmann-fold superfamily protein	STRINGENT	STRINGENT	STRINGENT	YES	YES	YES	YES	3'UTR	NO	3'UTR	3'UTR, CDS	Stop codon	3'UTR
AT5G02380	Q38805	MT2B	MT2B	metallothionein 2B	STRINGENT	STRINGENT	N.A.	YES	YES	NO	NO	3'UTR	3'UTR	3'UTR	5'UTR, 3'UTR, CDS	NO	NO
AT5G02450	Q9LZ57	AT5G02450		Ribosomal protein L36e family protein	STRINGENT	STRINGENT	STRINGENT	YES	YES	YES	YES	3'UTR	NO	3'UTR	3'UTR, CDS	Stop codon	NO
AT5G02500	F4KCE5, P22953	HSC70-1	AT-HSC70-1, AtHsp70-1, HSC70, HSC70-1, HSP70-1	heat shock cognate protein 70-1	STRINGENT	STRINGENT	STRINGENT	YES	YES	YES	YES	3'UTR,3'UTR	NO	3'UTR	3'UTR, 5'UTR, CDS	NO	NO
AT5G02502	Q8L986	AT5G02502		Oligosaccaryltransferase	STRINGENT	STRINGENT	STRINGENT	NO	YES	NO	YES	3'UTR	NO	3'UTR	3'UTR	NO	NO
AT5G02610	F4KDR2, Q9LZ41	AT5G02610		Ribosomal L29 family protein	STRINGENT	STRINGENT	STRINGENT	YES	YES	YES	YES	3'UTR,3'UTR	NO	3'UTR	3'UTR	Stop codon	3'UTR
AT5G02790	Q9LZ06	GSTL3	GSTL3	Glutathione S-transferase family protein	STRINGENT	STRINGENT	STRINGENT	YES	YES	YES	YES	3'UTR	NO	3'UTR	3'UTR	Stop codon	3'UTR
AT5G02840	A0A1P8BFY6, A0A1P8BFZ8, Q6R0G4, Q6R0G4-2	LCL1	LCL1, RVE4	LHY/CCA1-like 1	STRINGENT	STRINGENT	STRINGENT	YES	NO	YES	NO	3'UTR,3'UTR	3'UTR	3'UTR	3'UTR	NO	3'UTR
AT5G02870	F4KDU5, P49691, Q9ASS3	AT5G02870	RPL4	Ribosomal protein L4/L1 family	STRINGENT	STRINGENT	STRINGENT	YES	YES	YES	YES	3'UTR,3'UTR	NO	3'UTR	3'UTR	Stop codon	NO
AT5G02960	P49201	AT5G02960		Ribosomal protein S12/S23 family protein	STRINGENT	STRINGENT	STRINGENT	YES	YES	YES	YES	CDS,3'UTR	NO	3'UTR	3'UTR	NO	NO
AT5G03290	Q945K7	IDH-V	IDH-V	isocitrate dehydrogenase V	STRINGENT	STRINGENT	STRINGENT	YES	YES	YES	YES	3'UTR	3'UTR	NO	NO	NO	NO
AT5G03345	A0A2H1ZE54, Q2HIM5, Q2HIM5-2	AT5G03345	PRCE2	membrane magnesium transporter-like protein	STRINGENT	STRINGENT	STRINGENT	YES	NO	YES	YES	3'UTR,3'UTR	NO	3'UTR	3'UTR	Stop codon	3'UTR
AT5G03455	A0A178UK97, A0A1P8BFF8, Q8GY31	CDC25	ACR2, ARATH;CDC25, AtACR2, CDC25	Rhodanese/Cell cycle control phosphatase superfamily protein	STRINGENT	STRINGENT	STRINGENT	YES	YES	YES	YES	CDS,3'UTR,3'UTR,3'UTR	3'UTR	3'UTR	3'UTR	Stop codon	3'UTR
AT5G03460	Q9LZE0	AT5G03460		transmembrane protein	STRINGENT	STRINGENT	STRINGENT	YES	YES	YES	YES	3'UTR	NO	NO	3'UTR	Stop codon	3'UTR
AT5G03520	Q9LZD4, Q9LZD4-2	RAB8C	ATRAB-E1D, ATRAB8C, ATRABE1D, RAB-E1D, RAB8C	RAB GTPase homolog 8C	STRINGENT	STRINGENT	STRINGENT	YES	YES	YES	YES	3'UTR,3'UTR	NO	3'UTR	3'UTR	3' UTR	3'UTR
AT5G03540	B3H609, F4KGM7, Q9LZD3	EXO70A1	ATEXO70A1, EXO70A1	exocyst subunit exo70 family protein A1	STRINGENT	STRINGENT	STRINGENT	YES	NO	YES	NO	3'UTR,3'UTR,3'UTR	3'UTR	NO	3'UTR	NO	3'UTR
AT5G03650	Q9LZS3	SBE2.2	SBE2.2	starch branching enzyme 2.2	STRINGENT	STRINGENT	N.A.	YES	NO	NO	NO	3'UTR	3'UTR	3'UTR	3'UTR, CDS	Stop codon	3'UTR
AT5G03660	A0A1P8BDB2, F4KGP6, Q940P0	AT5G03660		transcriptional activator (DUF662)	STRINGENT	STRINGENT	STRINGENT	YES	YES	YES	YES	3'UTR,3'UTR,3'UTR	NO	NO	3'UTR	3' UTR	3'UTR
AT5G03850	Q9SR73	AT5G03850		Nucleic acid-binding, OB-fold-like protein	STRINGENT	STRINGENT	STRINGENT	YES	YES	YES	YES	3'UTR	NO	3'UTR	3'UTR	Stop codon	NO
AT5G03880	Q940I2	AT5G03880		Thioredoxin family protein	STRINGENT	STRINGENT	N.A.	YES	YES	NO	NO	3'UTR	3'UTR	3'UTR	3'UTR, CDS	Stop codon	3'UTR
AT5G03940	P37107	CPSRP54	54CP, CPSRP54, FFC, SRP54CP	chloroplast signal recognition particle 54 kDa subunit	STRINGENT	STRINGENT	N.A.	YES	YES	NO	NO	3'UTR	3'UTR	3'UTR	3'UTR	Stop codon	3'UTR
AT5G04140	Q0WW25, Q9ZNZ7, Q9ZNZ7-2	GLU1	FD-GOGAT, GLS1, GLU1, GLUS	glutamate synthase 1	STRINGENT	STRINGENT	N.A.	YES	YES	NO	NO	3'UTR,3'UTR	NO	3'UTR	3'UTR, 5'UTR	CDS, Stop codon	NO
AT5G04170	Q9FYE4	AT5G04170		Calcium-binding EF-hand family protein	STRINGENT	N.A.	STRINGENT	NO	NO	YES	NO	3'UTR	NO	3'UTR	3'UTR	NO	NO
AT5G04430	A0A178U8S9, A0A178U997, Q9LZ82, Q9LZ82-2	BTR1L	BTR1, BTR1L, BTR1S	binding to TOMV RNA 1L (long form)	STRINGENT	STRINGENT	STRINGENT	YES	YES	YES	YES	3'UTR,3'UTR	NO	3'UTR	3'UTR	3' UTR	3'UTR
AT5G04590	Q9LZ66	SIR	SIR	sulfite reductase	STRINGENT	STRINGENT	STRINGENT	YES	YES	YES	YES	3'UTR	NO	3'UTR	3'UTR	Stop codon	NO
AT5G04600	Q9LZ65	AT5G04600		RNA-binding (RRM/RBD/RNP motifs) family protein	STRINGENT	STRINGENT	STRINGENT	YES	YES	YES	YES	3'UTR	NO	3'UTR	3'UTR	Stop codon	NO
AT5G04740	F4JXP5, Q9LZ23	ACR12	ACR12	ACT domain-containing protein	STRINGENT	N.A.	STRINGENT	NO	NO	YES	YES	3'UTR,3'UTR	NO	3'UTR, CDS	3'UTR	Stop codon	3'UTR
AT5G04750	F4JXP8, Q84W11	AT5G04750		F1F0-ATPase inhibitor protein	STRINGENT	STRINGENT	STRINGENT	YES	YES	YES	YES	3'UTR,3'UTR	NO	3'UTR	3'UTR	Stop codon	CDS, 3'UTR
AT5G04800	Q9LZ17	AT5G04800		Ribosomal S17 family protein	STRINGENT	STRINGENT	STRINGENT	YES	YES	YES	YES	3'UTR,3'UTR,3'UTR,3'UTR	NO	3'UTR	3'UTR	NO	NO
AT5G04830	Q9FMC7	AT5G04830		Nuclear transport factor 2 (NTF2) family protein	STRINGENT	N.A.	STRINGENT	NO	NO	YES	NO	3'UTR,3'UTR	3'UTR	3'UTR	3'UTR	NO	NO
AT5G05010	Q93Y22	AT5G05010		clathrin adaptor complexes medium subunit family protein	STRINGENT	STRINGENT	STRINGENT	YES	YES	YES	YES	3'UTR,3'UTR	NO	3'UTR	3'UTR	Stop codon	3'UTR
AT5G05060	Q9FF68	AT5G05060		Cystatin/monellin superfamily protein	STRINGENT	STRINGENT	STRINGENT	YES	YES	YES	YES	3'UTR	NO	3'UTR	3'UTR	3' UTR	3'UTR
AT5G05170	Q941L0	CEV1	ATCESA3, ATH-B, CESA3, CEV1, ELI1, IXR1, MRE1	Cellulose synthase family protein	STRINGENT	STRINGENT	STRINGENT	YES	NO	YES	NO	3'UTR	NO	3'UTR, CDS	3'UTR	NO	NO
AT5G05200	Q9ASX5	AT5G05200		Protein kinase superfamily protein	STRINGENT	STRINGENT	STRINGENT	YES	NO	YES	NO	3'UTR	3'UTR	3'UTR	3'UTR	Stop codon	3'UTR
AT5G05370	Q9FLB7	AT5G05370		Cytochrome b-c1 complex, subunit 8 protein	STRINGENT	STRINGENT	STRINGENT	YES	YES	YES	YES	3'UTR	NO	3'UTR	3'UTR	Stop codon	3'UTR
AT5G05690	A8MRD1, F4K0T0, Q42569	CPD	CBB3, CPD, CYP90, CYP90A, CYP90A1, DWF3	Cytochrome P450 superfamily protein	STRINGENT	STRINGENT	STRINGENT	YES	YES	YES	YES	3'UTR,3'UTR,3'UTR	NO	3'UTR	3'UTR	3' UTR	NO
AT5G05780	F4K0U3, O24412	RPN8A	AE3, ATHMOV34, RPN8A	RP non-ATPase subunit 8A	STRINGENT	STRINGENT	STRINGENT	YES	NO	YES	YES	3'UTR,3'UTR	NO	3'UTR	3'UTR	3' UTR	3'UTR
AT5G06060	Q9LHT0	AT5G06060		NAD(P)-binding Rossmann-fold superfamily protein	STRINGENT	N.A.	STRINGENT	NO	NO	YES	YES	3'UTR	NO	3'UTR	3'UTR	NO	3'UTR
AT5G06220	A0A1P8B9X6, F4K2D7, F4K2D8	AT5G06220		LETM1-like protein	STRINGENT	STRINGENT	STRINGENT	YES	NO	YES	NO	3'UTR,3'UTR	NO	3'UTR	3'UTR	3' UTR	3'UTR
AT5G06290	A0A1P8BD74, Q9C5R8	2-Cys Prx B	2-Cys Prx B, 2CPB	2-cysteine peroxiredoxin B	STRINGENT	STRINGENT	N.A.	YES	YES	NO	NO	3'UTR,3'UTR	NO	3'UTR	3'UTR	CDS, Stop codon	NO
AT5G06340	Q9FNH4	NUDX27	ATNUDX27, NUDX27	nudix hydrolase homolog 27	STRINGENT	STRINGENT	STRINGENT	YES	YES	YES	YES	3'UTR	NO	CDS, 3'UTR	3'UTR, CDS	NO	3'UTR
AT5G06360	Q9FNH2	AT5G06360		Ribosomal protein S8e family protein	STRINGENT	N.A.	STRINGENT	NO	NO	YES	YES	3'UTR	3'UTR	3'UTR	3'UTR	Stop codon	NO
AT5G06600	F4K3X1, Q9FPT1, Q9FPT1-2	UBP12	AtUBP12, UBP12	ubiquitin-specific protease 12	STRINGENT	STRINGENT	STRINGENT	YES	NO	YES	YES	3'UTR,3'UTR	3'UTR	3'UTR	3'UTR	3' UTR	3'UTR
AT5G07020	Q9FL44	AT5G07020	MPH1	proline-rich family protein	STRINGENT	STRINGENT	N.A.	YES	YES	NO	NO	3'UTR	3'UTR	3'UTR	3'UTR	Stop codon	NO
AT5G07090	C0Z342, F4K5C7, P49204	AT5G07090		Ribosomal protein S4 (RPS4A) family protein	STRINGENT	STRINGENT	STRINGENT	YES	YES	YES	YES	3'UTR,3'UTR,3'UTR	3'UTR	3'UTR	3'UTR, 5'UTR	NO	NO
AT5G07350	Q8VZG7, Q8VZG7-2	Tudor1	AtTudor1, TSN1, Tudor1	TUDOR-SN protein 1	STRINGENT	STRINGENT	STRINGENT	YES	YES	YES	YES	3'UTR	NO	3'UTR, CDS	3'UTR, CDS	coding_intron	3'UTR, CDS
AT5G07370	Q9LY23	IPK2a	ATIPK2A, IMPK, IPK2a	inositol polyphosphate kinase 2 alpha	STRINGENT	STRINGENT	STRINGENT	YES	NO	YES	NO	3'UTR,3'UTR,3'UTR,3'UTR	3'UTR	3'UTR	3'UTR	NO	3'UTR
AT5G07470	Q9LY14	PMSR3	ATMSRA3, PMSR3	peptidemethionine sulfoxide reductase 3	STRINGENT	STRINGENT	STRINGENT	YES	YES	YES	YES	3'UTR	NO	3'UTR	3'UTR	Stop codon	3'UTR
AT5G07960	Q9SD88	AT5G07960		asterix-like protein	STRINGENT	STRINGENT	STRINGENT	YES	YES	YES	YES	3'UTR	3'UTR	3'UTR	3'UTR	Stop codon	3'UTR
AT5G08040	Q9SD80	TOM5	TOM5	mitochondrial import receptor subunit TOM5-like protein	STRINGENT	STRINGENT	STRINGENT	YES	YES	YES	YES	3'UTR	NO	3'UTR	3'UTR	NO	3'UTR
AT5G08060	Q9SD78	AT5G08060		furry	STRINGENT	STRINGENT	STRINGENT	YES	YES	YES	YES	3'UTR	NO	3'UTR	3'UTR	3' UTR	NO
AT5G08160	F4K9L9, O04265	PK3	ATPK3, PK3	serine/threonine protein kinase 3	STRINGENT	STRINGENT	STRINGENT	YES	YES	YES	YES	3'UTR,3'UTR	NO	3'UTR	3'UTR	NO	3'UTR
AT5G08280	Q43316, Q56ZT3	HEMC	HEMC, RUG1	hydroxymethylbilane synthase	STRINGENT	STRINGENT	N.A.	YES	YES	NO	NO	3'UTR	3'UTR	3'UTR	3'UTR	Stop codon	NO
AT5G08290	A0A1P8BDD3, Q9FE62	YLS8	YLS8	mRNA splicing factor, thioredoxin-like U5 snRNP	STRINGENT	STRINGENT	N.A.	YES	NO	NO	NO	3'UTR,3'UTR	3'UTR	3'UTR	3'UTR	Stop codon	NO
AT5G08300	P68209	AT5G08300		Succinyl-CoA ligase, alpha subunit	STRINGENT	STRINGENT	STRINGENT	YES	YES	YES	YES	3'UTR	NO	3'UTR	3'UTR	Stop codon	NO
AT5G08450	A0A178U9U2, A0A178ULB6, Q8RWV9	AT5G08450	HDC1, RXT3-like	zinc finger CCCH domain protein	STRINGENT	STRINGENT	STRINGENT	YES	NO	YES	NO	3'UTR,3'UTR,3'UTR	NO	3'UTR	3'UTR, CDS	Stop codon, CDS	3'UTR
AT5G08530	Q9FNN5	CI51	CI51, NDUFV1	51 kDa subunit of complex I	STRINGENT	STRINGENT	STRINGENT	YES	YES	YES	YES	3'UTR	NO	3'UTR	3'UTR	3' UTR	3'UTR
AT5G08590	A0A1P8BD58, P43292	SNRK2.1	ASK2, SNRK2-1, SNRK2.1, SRK2G	SNF1-related protein kinase 2.1	STRINGENT	STRINGENT	STRINGENT	YES	YES	YES	YES	3'UTR,3'UTR	NO	3'UTR	3'UTR	Stop codon	3'UTR
AT5G08650	A0A1P8B9J8, Q9FNM5	AT5G08650		Small GTP-binding protein	STRINGENT	STRINGENT	N.A.	YES	NO	NO	NO	3'UTR,3'UTR	NO	3'UTR	3'UTR	Stop codon	3'UTR
AT5G08670					STRINGENT	STRINGENT	STRINGENT	YES	YES	YES	YES	3'UTR	NO	3'UTR	3'UTR	Stop codon	3'UTR
AT5G08680	Q9C5A9	AT5G08680		ATP synthase alpha/beta family protein	STRINGENT	STRINGENT	STRINGENT	YES	YES	YES	YES	3'UTR	NO	3'UTR	3'UTR	3' UTR	NO
AT5G08690	P83484	AT5G08690		ATP synthase alpha/beta family protein	STRINGENT	STRINGENT	STRINGENT	YES	YES	YES	YES	3'UTR	3'UTR	3'UTR	3'UTR	3' UTR	NO
AT5G09225	Q8GYQ7	AT5G09225		transmembrane protein	STRINGENT	STRINGENT	STRINGENT	YES	YES	YES	YES	3'UTR	NO	3'UTR	3'UTR	Stop codon	3'UTR
AT5G09510	A0A178UCF5, A8MQ96, Q9FY64	AT5G09510		Ribosomal protein S19 family protein	STRINGENT	STRINGENT	STRINGENT	YES	YES	YES	YES	3'UTR,3'UTR	NO	3'UTR	3'UTR	Stop codon	NO
AT5G09650	Q9LXC9	PPa6	AtPPa6, PPa6	pyrophosphorylase 6	STRINGENT	STRINGENT	STRINGENT	YES	YES	YES	YES	3'UTR	CDS	3'UTR	3'UTR	Stop codon	NO
AT5G09660	A0A1P8BBQ0, A8MRP1, B3H560, F4KDZ4, Q9ZP05	PMDH2	PMDH2	peroxisomal NAD-malate dehydrogenase 2	STRINGENT	STRINGENT	N.A.	YES	YES	NO	NO	3'UTR,3'UTR,3'UTR,3'UTR,3'UTR	NO	3'UTR	3'UTR, CDS, 5'UTR	Stop codon	NO
AT5G09770	Q8LD39	AT5G09770		Ribosomal protein L17 family protein	STRINGENT	STRINGENT	STRINGENT	YES	YES	YES	YES	3'UTR	3'UTR	NO	3'UTR	NO	3'UTR
AT5G09810	P53492	ACT7	ACT7, AtACT7	actin 7	STRINGENT	STRINGENT	STRINGENT	YES	YES	YES	YES	3'UTR	NO	3'UTR	3'UTR, 5'UTR	Stop codon	NO
AT5G09830	Q9FIC3	AT5G09830	BolA2, BolA3	BolA-like family protein	STRINGENT	STRINGENT	STRINGENT	YES	NO	YES	NO	3'UTR	NO	3'UTR	3'UTR	NO	3'UTR
AT5G09900	B3H6B0, F4KFD7, Q9FIB6	EMB2107	EMB2107, MSA, RPN5A	26S proteasome regulatory subunit, putative (RPN5)	STRINGENT	STRINGENT	STRINGENT	YES	YES	YES	YES	3'UTR,3'UTR,3'UTR	CDS	3'UTR	3'UTR, CDS	Stop codon	3'UTR
AT5G10360	F4KGU2, P51430	EMB3010	EMB3010, RPS6B	Ribosomal protein S6e	STRINGENT	STRINGENT	STRINGENT	YES	YES	YES	YES	3'UTR,3'UTR	NO	3'UTR	3'UTR	Stop codon	NO
AT5G10450	F4KGV2, F4KGV5, P48349, P48349-2	GRF6	14-3-3lambda, AFT1, GRF6	G-box regulating factor 6	STRINGENT	STRINGENT	STRINGENT	YES	YES	YES	YES	3'UTR,3'UTR,3'UTR,3'UTR	NO	3'UTR	3'UTR, 5'UTR, CDS	Stop codon	NO
AT5G10470	Q9LX99, Q9LX99-2	KAC1	KAC1, KCA1	kinesin like protein for actin based chloroplast movement 1	STRINGENT	STRINGENT	STRINGENT	YES	NO	YES	NO	3'UTR	3'UTR	3'UTR	3'UTR	Stop codon	NO
AT5G10480	F4KGW0, Q8VZB2, Q8VZB2-2	PAS2	PAS2, PEP	Protein-tyrosine phosphatase-like, PTPLA	STRINGENT	STRINGENT	STRINGENT	YES	YES	YES	YES	3'UTR,3'UTR,3'UTR	NO	3'UTR	3'UTR	Stop codon	3'UTR
AT5G10780	A8MQD8, Q93VE6	AT5G10780		ER membrane protein complex subunit-like protein	STRINGENT	STRINGENT	STRINGENT	YES	YES	YES	YES	3'UTR,3'UTR	NO	3'UTR	3'UTR	Stop codon	3'UTR
AT5G10860	Q9LEV3	CBSX3	CBSX3	Cystathionine beta-synthase (CBS) family protein	STRINGENT	N.A.	STRINGENT	NO	NO	YES	NO	3'UTR	NO	3'UTR	3'UTR	3' UTR	3'UTR
AT5G10980	P59169	AT5G10980	H3.3, HTR8	Histone superfamily protein	STRINGENT	STRINGENT	STRINGENT	YES	YES	YES	NO	3'UTR	NO	3'UTR	3'UTR	NO	NO
AT5G11170	A0A178UI50, C0Z397, F4JWF3, Q9LFN6	UAP56a	UAP56a	DEAD/DEAH box RNA helicase family protein	STRINGENT	STRINGENT	STRINGENT	YES	YES	YES	YES	3'UTR,3'UTR	3'UTR	3'UTR	3'UTR	3' UTR	3'UTR
AT5G11200	F4JWF6, F4JWF7, Q9LFN6	UAP56b	UAP56b	DEAD/DEAH box RNA helicase family protein	STRINGENT	STRINGENT	STRINGENT	YES	YES	YES	YES	3'UTR,3'UTR,3'UTR	CDS	3'UTR	3'UTR	3' UTR	3'UTR
AT5G11500	F4JXW2, Q9LYE1	AT5G11500		coiled-coil protein	STRINGENT	STRINGENT	STRINGENT	YES	YES	YES	YES	CDS,CDS,3'UTR	3'UTR	3'UTR	3'UTR, CDS	Stop codon	3'UTR
AT5G11520	P46644	ASP3	ASP3, YLS4	aspartate aminotransferase 3	STRINGENT	STRINGENT	STRINGENT	YES	YES	YES	YES	3'UTR	3'UTR, StopCodon	3'UTR	3'UTR	Stop codon	NO
AT5G11560	F4JXW9	AT5G11560		catalytics	STRINGENT	STRINGENT	STRINGENT	YES	YES	YES	YES	3'UTR	NO	3'UTR	3'UTR	Stop codon	3'UTR
AT5G11710	Q8VY07	AT5G11710		ENTH/VHS family protein	STRINGENT	STRINGENT	STRINGENT	YES	YES	YES	YES	3'UTR,3'UTR,3'UTR	3'UTR	3'UTR	3'UTR	3' UTR	3'UTR
AT5G11770	Q42577	AT5G11770		NADH-ubiquinone oxidoreductase 20 kDa subunit	STRINGENT	STRINGENT	STRINGENT	YES	YES	YES	YES	3'UTR	NO	3'UTR	3'UTR	Stop codon, CDS	3'UTR
AT5G11900	Q8VZK2	AT5G11900		Translation initiation factor SUI1 family protein	STRINGENT	N.A.	STRINGENT	NO	NO	YES	NO	3'UTR	NO	3'UTR	3'UTR	Stop codon	3'UTR
AT5G11960	Q8RWH8	AT5G11960		magnesium transporter, putative (DUF803)	STRINGENT	STRINGENT	STRINGENT	YES	NO	YES	YES	3'UTR	3'UTR	3'UTR	3'UTR	Stop codon	3'UTR
AT5G12140	Q945Q1	CYS1	ATCYS1, CYS1	cystatin-1	STRINGENT	STRINGENT	STRINGENT	YES	YES	YES	YES	3'UTR	NO	3'UTR	3'UTR	3' UTR	3'UTR
AT5G12150	B3H5D4, Q9FMP8	AT5G12150	PHGAP1	Rho GTPase activation protein (RhoGAP) with PH domain-containing protein	STRINGENT	STRINGENT	STRINGENT	YES	NO	YES	NO	3'UTR,3'UTR	NO	3'UTR	3'UTR	Stop codon	NO
AT5G12200	Q94K57, Q9FMP3	PYD2	PYD2	pyrimidine 2	STRINGENT	STRINGENT	STRINGENT	YES	NO	YES	YES	3'UTR	NO	3'UTR	3'UTR	NO	3'UTR
AT5G12240	F4K0V9, Q6NQD2	AT5G12240		octanoyltransferase	STRINGENT	N.A.	STRINGENT	NO	NO	YES	YES	3'UTR,3'UTR	3'UTR, StopCodon	3'UTR	3'UTR	Stop codon	3'UTR
AT5G12310	A0A178UC13, A0A178UJP4, Q94CL1	AT5G12310		RING/U-box superfamily protein	STRINGENT	STRINGENT	STRINGENT	YES	NO	YES	NO	3'UTR	NO	3'UTR	3'UTR	Stop codon	3'UTR
AT5G12370	F4K0X7, X5JA13	SEC10	SEC10	exocyst complex component sec10	STRINGENT	N.A.	STRINGENT	NO	NO	YES	NO	3'UTR,3'UTR,3'UTR	3'UTR	3'UTR	3'UTR	Stop codon	3'UTR
AT5G12470	Q94CJ5	AT5G12470	RER4	UvrABC system C protein, putative (DUF3411)	STRINGENT	STRINGENT	STRINGENT	YES	YES	YES	YES	3'UTR	NO	3'UTR	3'UTR	Stop codon	3'UTR
AT5G12860	B3H4S6, Q9LXV3	DiT1	DiT1	dicarboxylate transporter 1	STRINGENT	STRINGENT	STRINGENT	YES	YES	YES	YES	3'UTR,3'UTR,3'UTR	NO	3'UTR	3'UTR	Stop codon, CDS	NO
AT5G13000	F4K116, Q9LXT9	GSL12	ATGSL12, CALS3, gsl12, GSL12	glucan synthase-like 12	STRINGENT	STRINGENT	STRINGENT	YES	YES	YES	YES	3'UTR,3'UTR	3'UTR	3'UTR, CDS	3'UTR	NO	3'UTR
AT5G13120	Q9ASS6, Q9ASS6-2	Pnsl5	ATCYP20-2, CYP20-2, Pnsl5	cyclophilin 20-2	STRINGENT	STRINGENT	STRINGENT	YES	YES	YES	YES	3'UTR,3'UTR	3'UTR	3'UTR	3'UTR	Stop codon	3'UTR
AT5G13240	A0A1P8BBF5, A0A1P8BBF6, Q8RXT1	AT5G13240	1	transcription regulator	STRINGENT	STRINGENT	STRINGENT	YES	NO	YES	NO	3'UTR,3'UTR,3'UTR	NO	3'UTR	3'UTR	3' UTR	3'UTR
AT5G13280	Q9LYU8	AK-LYS1	AK, AK-LYS1, AK1	aspartate kinase 1	STRINGENT	STRINGENT	STRINGENT	YES	NO	YES	YES	3'UTR	3'UTR	3'UTR	NO	Stop codon	3'UTR
AT5G13420	Q9LYR4	TRA2	TRA2	Aldolase-type TIM barrel family protein	STRINGENT	N.A.	STRINGENT	NO	NO	YES	YES	3'UTR	3'UTR	3'UTR	NO	CDS	NO
AT5G13430	Q94JS0	AT5G13430		Ubiquinol-cytochrome C reductase iron-sulfur subunit	STRINGENT	STRINGENT	STRINGENT	YES	YES	YES	YES	3'UTR	NO	3'UTR	3'UTR	Stop codon	3'UTR
AT5G13440	Q9LYR2	AT5G13440		Ubiquinol-cytochrome C reductase iron-sulfur subunit	STRINGENT	STRINGENT	STRINGENT	YES	YES	YES	YES	3'UTR	NO	3'UTR	3'UTR	Stop codon	3'UTR
AT5G13450	B9DGP8, Q96251	ATP5	ATP5	delta subunit of Mt ATP synthase	STRINGENT	STRINGENT	STRINGENT	YES	YES	YES	YES	3'UTR,3'UTR	CDS, 3'UTR, StopCodon	3'UTR, 5'UTR	3'UTR	Stop codon	NO
AT5G13500	Q9FY51	AT5G13500	HPAT3	Hyp O-arabinosyltransferase-like protein	STRINGENT	N.A.	STRINGENT	NO	NO	YES	YES	3'UTR,3'UTR,3'UTR	NO	3'UTR	NO	NO	NO
AT5G13510	Q9FY50	EMB3136	EMB3136	Ribosomal protein L10 family protein	STRINGENT	STRINGENT	N.A.	YES	NO	NO	NO	3'UTR	NO	3'UTR	3'UTR	NO	NO
AT5G13630	A8MR05, Q9FNB0	GUN5	ABAR, CCH, CCH1, CHLH, GUN5	magnesium-chelatase subunit chlH, chloroplast, putative / Mg-protoporphyrin IX chelatase, putative (CHLH)	STRINGENT	STRINGENT	STRINGENT	YES	YES	YES	NO	3'UTR,3'UTR	3'UTR	3'UTR	3'UTR, CDS	Stop codon	NO
AT5G13640	A0A1P8BD92, A0A1P8BD95, Q9FNA9	PDAT	ATPDAT, PDAT, PDAT1	phospholipid:diacylglycerol acyltransferase	STRINGENT	STRINGENT	STRINGENT	YES	NO	YES	NO	3'UTR,3'UTR,3'UTR	NO	3'UTR	3'UTR	3' UTR	NO
AT5G13710	Q9LM02	SMT1	CPH, SMT1	sterol methyltransferase 1	STRINGENT	STRINGENT	STRINGENT	YES	NO	YES	YES	3'UTR,3'UTR	NO	3'UTR	3'UTR, 5'UTR	Stop codon	NO
AT5G13780	Q9FKI4	AT5G13780	NAA10	Acyl-CoA N-acyltransferases (NAT) superfamily protein	STRINGENT	STRINGENT	STRINGENT	YES	YES	YES	YES	3'UTR	NO	3'UTR	3'UTR	Stop codon	3'UTR
AT5G13850	Q6ICZ8	NACA3	NACA3	nascent polypeptide-associated complex subunit alpha-like protein 3	STRINGENT	STRINGENT	STRINGENT	YES	YES	YES	YES	3'UTR	NO	3'UTR	3'UTR	NO	3'UTR
AT5G14030	A0A1P8BF69, Q94BY3	AT5G14030		translocon-associated protein beta (TRAPB) family protein	STRINGENT	STRINGENT	STRINGENT	YES	NO	YES	YES	3'UTR,3'UTR	NO	3'UTR	3'UTR	coding_intron	3'UTR
AT5G14040	Q9FMU6	PHT3;1	MPT3, PHT3;1	phosphate transporter 3;1	STRINGENT	STRINGENT	STRINGENT	YES	YES	YES	YES	3'UTR	NO	3'UTR	3'UTR, 5'UTR	3' UTR, CDS	3'UTR
AT5G14260	A0A1P8BDE0, Q8VZB5	AT5G14260		Rubisco methyltransferase family protein	STRINGENT	STRINGENT	N.A.	YES	YES	NO	NO	3'UTR,3'UTR,3'UTR	3'UTR	3'UTR	3'UTR	3' UTR	3'UTR
AT5G14320	B3H631, P42732	EMB3137	EMB3137	Ribosomal protein S13/S18 family	STRINGENT	STRINGENT	STRINGENT	YES	YES	YES	NO	3'UTR,3'UTR	NO	3'UTR	3'UTR, CDS, 5'UTR	NO	NO
AT5G14640	Q8VZD5	SK13	ATSK13, SK13	shaggy-like kinase 13	STRINGENT	STRINGENT	STRINGENT	YES	NO	YES	YES	3'UTR,3'UTR	CDS	3'UTR	3'UTR	NO	3'UTR
AT5G14680	Q9LYJ2	AT5G14680		Adenine nucleotide alpha hydrolases-like superfamily protein	STRINGENT	STRINGENT	STRINGENT	YES	NO	YES	YES	3'UTR	3'UTR	3'UTR	3'UTR	Stop codon	3'UTR
AT5G14910	Q93VK7	AT5G14910		Heavy metal transport/detoxification superfamily protein	STRINGENT	STRINGENT	N.A.	YES	YES	NO	NO	3'UTR,3'UTR	3'UTR	3'UTR	3'UTR	Stop codon	3'UTR
AT5G15090	Q9SMX3	VDAC3	AtVDAC-3, ATVDAC3, VDAC3	voltage dependent anion channel 3	STRINGENT	STRINGENT	STRINGENT	YES	YES	YES	YES	3'UTR,3'UTR,3'UTR	NO	3'UTR	3'UTR	Stop codon	NO
AT5G15200	B3H7J6, Q9LXG1	AT5G15200		Ribosomal protein S4	STRINGENT	STRINGENT	STRINGENT	YES	YES	YES	YES	5'UTR,5'UTR,CDS,3'UTR	NO	3'UTR	3'UTR, CDS	Stop codon	NO
AT5G15320	A8MQH0, Q8GXE7	AT5G15320		ATP synthase E chain	STRINGENT	STRINGENT	STRINGENT	YES	YES	YES	YES	3'UTR,3'UTR	NO	3'UTR	3'UTR	3' UTR	3'UTR
AT5G15350	Q39131	ENODL17	AtENODL17, ENODL17	early nodulin-like protein 17	STRINGENT	N.A.	STRINGENT	NO	NO	NO	YES	3'UTR	NO	3'UTR	3'UTR, 5'UTR	NO	NO
AT5G15650	Q9LFW1	RGP2	ATRGP2, MUR5, RGP2	reversibly glycosylated polypeptide 2	STRINGENT	STRINGENT	STRINGENT	YES	YES	YES	YES	3'UTR	NO	3'UTR	3'UTR	NO	3'UTR
AT5G16050	P42645	GRF5	GF14 UPSILON, GRF5	general regulatory factor 5	STRINGENT	STRINGENT	STRINGENT	YES	YES	YES	YES	3'UTR,3'UTR	NO	3'UTR	3'UTR	Stop codon	NO
AT5G16070	Q8L7N0	AT5G16070		TCP-1/cpn60 chaperonin family protein	STRINGENT	STRINGENT	STRINGENT	YES	NO	YES	YES	3'UTR	3'UTR	NO	3'UTR	NO	3'UTR
AT5G16130	Q8LD03	AT5G16130		Ribosomal protein S7e family protein	STRINGENT	STRINGENT	STRINGENT	YES	YES	YES	YES	3'UTR	NO	3'UTR	3'UTR	Stop codon	NO
AT5G16150	Q56ZZ7	PGLCT	GLT1, PGLCT	plastidic GLC translocator	STRINGENT	STRINGENT	STRINGENT	YES	NO	YES	NO	3'UTR,3'UTR,3'UTR	NO	3'UTR	3'UTR	Stop codon	NO
AT5G16440	A0A178ULI3, Q38929, Q38929-2	IPP1	IPP1	isopentenyl diphosphate isomerase 1	STRINGENT	STRINGENT	STRINGENT	YES	YES	YES	YES	3'UTR	3'UTR	3'UTR	3'UTR	Stop codon	3'UTR
AT5G16470	Q9FFD8	AT5G16470	MBS2	zinc finger (C2H2 type) family protein	STRINGENT	STRINGENT	STRINGENT	NO	YES	YES	YES	3'UTR,3'UTR	3'UTR	3'UTR	3'UTR	NO	NO
AT5G16620	A0A178UCV7, A0A178UD08, Q9FMD5	TIC40	ATTIC40, PDE120, TIC40	hydroxyproline-rich glycoprotein family protein	STRINGENT	STRINGENT	STRINGENT	YES	YES	YES	YES	3'UTR	NO	3'UTR	3'UTR	Stop codon	3'UTR
AT5G16650	A0A1P8BDW0, Q9FMD2	AT5G16650		Chaperone DnaJ-domain superfamily protein	STRINGENT	STRINGENT	STRINGENT	YES	YES	YES	NO	3'UTR,3'UTR	3'UTR	NO	3'UTR	NO	3'UTR
AT5G16660	A8MS48, Q8H0X5, Q9C5U9, Q9LFF0	AT5G16660		Low-density receptor-like protein	STRINGENT	STRINGENT	STRINGENT	YES	YES	YES	NO	3'UTR,3'UTR	NO	3'UTR	3'UTR	NO	NO
AT5G16710	Q8LE52	DHAR3	DHAR3	dehydroascorbate reductase 1	STRINGENT	STRINGENT	STRINGENT	YES	YES	YES	YES	3'UTR	NO	3'UTR	3'UTR	Stop codon	3'UTR
AT5G16840	Q9LFD5, Q9LFD5-2, Q9LFD5-3, Q9LFD5-4	BPA1	BPA1	binding partner of acd11 1	STRINGENT	STRINGENT	STRINGENT	YES	NO	YES	NO	3'UTR,3'UTR,3'UTR	5'UTR	3'UTR	3'UTR	NO	3'UTR
AT5G16880	F4KFJ2, Q9LFL3	AT5G16880		Target of Myb protein 1	STRINGENT	N.A.	STRINGENT	NO	NO	YES	NO	3'UTR,3'UTR,3'UTR,3'UTR	NO	3'UTR	3'UTR	Stop codon	3'UTR
AT5G17020	Q9SMV6, Q9SMV6-2	XPO1A	ATCRM1, ATXPO1, HIT2, XPO1, XPO1A	exportin 1A	STRINGENT	STRINGENT	STRINGENT	YES	YES	YES	YES	3'UTR,3'UTR	NO	3'UTR	3'UTR	3' UTR	3'UTR
AT5G17170	A8MSF2, Q9FFJ2	ENH1	ENH1	rubredoxin family protein	STRINGENT	STRINGENT	N.A.	YES	NO	NO	NO	3'UTR,3'UTR	NO	3'UTR	3'UTR	Stop codon	3'UTR
AT5G17310	A0A1P8BC93, A0A1P8BC98, F4KGY8, P57751	UGP2	AtUGP2, UGP2	UDP-glucose pyrophosphorylase 2	STRINGENT	STRINGENT	STRINGENT	YES	YES	YES	YES	3'UTR,3'UTR,3'UTR,3'UTR,3'UTR,3'UTR	NO	NO	3'UTR	NO	NO
AT5G17330	A0A178UK63, Q42521	GAD	AtGAD1, GAD, GAD1	glutamate decarboxylase	STRINGENT	N.A.	STRINGENT	NO	NO	YES	YES	3'UTR	3'UTR	NO	5'UTR	NO	NO
AT5G17560	A0A1P8BBD0, A0A1P8BBE1, Q9LF68	AT5G17560	BolA4	BolA-like family protein	STRINGENT	STRINGENT	STRINGENT	YES	YES	YES	YES	CDS,3'UTR,3'UTR	NO	3'UTR	3'UTR	Stop codon, 3' UTR	3'UTR
AT5G17610	Q67Y04	AT5G17610		hypothetical protein	STRINGENT	STRINGENT	STRINGENT	YES	NO	YES	YES	3'UTR	NO	3'UTR	NO	NO	3'UTR
AT5G17710	Q94K56, Q9XQC7	EMB1241	EMB1241	Co-chaperone GrpE family protein	STRINGENT	STRINGENT	STRINGENT	YES	YES	YES	YES	3'UTR,3'UTR	NO	3'UTR	3'UTR	Stop codon	3'UTR
AT5G17770	Q9ZNT1	CBR	ATCBR, CBR, CBR1	NADH:cytochrome B5 reductase 1	STRINGENT	STRINGENT	STRINGENT	YES	YES	YES	YES	3'UTR	NO	3'UTR	3'UTR	Stop codon	3'UTR
AT5G17870	A0A1P8BCP6, Q9FKP0	PSRP6	PSRP6	plastid-specific 50S ribosomal protein 6	STRINGENT	STRINGENT	STRINGENT	NO	YES	YES	YES	3'UTR,3'UTR	NO	CDS, 3'UTR	3'UTR, 5'UTR, CDS	NO	NO
AT5G17920	O50008	ATMS1	ATCIMS, ATMETS, ATMS1	Cobalamin-independent synthase family protein	STRINGENT	STRINGENT	STRINGENT	YES	YES	YES	YES	3'UTR,3'UTR	NO	3'UTR	3'UTR	Stop codon	NO
AT5G18110	Q9FK59	NCBP	NCBP	Putative cap-binding protein	STRINGENT	STRINGENT	STRINGENT	YES	YES	YES	YES	3'UTR	NO	3'UTR	3'UTR	3' UTR, Stop codon	3'UTR
AT5G18380	A8MRX2, F4JWM1, Q42340	AT5G18380		Ribosomal protein S5 domain 2-like superfamily protein	STRINGENT	STRINGENT	STRINGENT	YES	YES	YES	YES	3'UTR,CDS,3'UTR,CDS	NO	3'UTR, CDS	CDS, 3'UTR	NO	NO
AT5G18650	Q8VZK0	AT5G18650	MIEL1	CHY-type/CTCHY-type/RING-type Zinc finger protein	STRINGENT	N.A.	STRINGENT	NO	NO	YES	NO	3'UTR	NO	3'UTR	3'UTR	3' UTR	3'UTR
AT5G18800	Q8LGE7	AT5G18800		Cox19-like CHCH family protein	STRINGENT	STRINGENT	STRINGENT	YES	YES	YES	YES	3'UTR,3'UTR	NO	3'UTR	3'UTR	Stop codon	3'UTR
AT5G19010	Q8W4J2	MPK16	MPK16	mitogen-activated protein kinase 16	STRINGENT	STRINGENT	STRINGENT	YES	NO	YES	YES	3'UTR	3'UTR	3'UTR	3'UTR	3' UTR	3'UTR
AT5G19220	P55229	APL1	ADG2, APL1	ADP glucose pyrophosphorylase large subunit 1	STRINGENT	STRINGENT	STRINGENT	YES	YES	YES	NO	3'UTR	NO	3'UTR	3'UTR, CDS	Stop codon	NO
AT5G19510	Q9SCX3	AT5G19510		Translation elongation factor EF1B/ribosomal protein S6 family protein	STRINGENT	STRINGENT	STRINGENT	YES	YES	YES	YES	CDS,3'UTR	NO	3'UTR	3'UTR, CDS	Stop codon	NO
AT5G19550	P46645, Q8L7N7	ASP2	AAT2, ASP2	aspartate aminotransferase 2	STRINGENT	STRINGENT	STRINGENT	YES	NO	YES	YES	3'UTR	NO	3'UTR	3'UTR	Stop codon	3'UTR
AT5G19590	Q8GUJ9	AT5G19590		DUF538 family protein (Protein of unknown function, DUF538)	STRINGENT	STRINGENT	STRINGENT	YES	NO	YES	NO	3'UTR,3'UTR	NO	3'UTR	3'UTR	3' UTR, CDS	3'UTR
AT5G19690	A0A1P8BFQ7, Q93ZY3	STT3A	STT3A	staurosporin and temperature sensitive 3-like A	STRINGENT	STRINGENT	STRINGENT	YES	YES	YES	YES	3'UTR,3'UTR	NO	3'UTR	3'UTR	Stop codon	3'UTR
AT5G19760	Q9C5M0	AT5G19760		Mitochondrial substrate carrier family protein	STRINGENT	STRINGENT	STRINGENT	YES	YES	YES	YES	3'UTR	NO	3'UTR	3'UTR	Stop codon	NO
AT5G19770	Q56WH1	TUA3	TUA3	tubulin alpha-3	STRINGENT	STRINGENT	STRINGENT	YES	NO	YES	YES	3'UTR	NO	3'UTR	3'UTR	Stop codon	NO
AT5G19780	Q56WH1	TUA5	TUA5	tubulin alpha-5	STRINGENT	STRINGENT	STRINGENT	YES	YES	YES	YES	3'UTR	NO	3'UTR	3'UTR, 5'UTR	3' UTR	3'UTR
AT5G19855	A0A1P8BCG6, Q8L9X2	RbcX2	AtRbcX2, RbcX2	Chaperonin-like RbcX protein	STRINGENT	STRINGENT	N.A.	YES	NO	NO	NO	3'UTR,3'UTR	3'UTR	3'UTR	3'UTR	3' UTR	3'UTR
AT5G19940	F4K2P2, Q941D3	AT5G19940		Plastid-lipid associated protein PAP / fibrillin family protein	STRINGENT	STRINGENT	N.A.	YES	NO	NO	NO	3'UTR,3'UTR	3'UTR	3'UTR	3'UTR, CDS, 5'UTR	NO	NO
AT5G19990	A0A1P8BCJ5, Q9C5U3	RPT6A	ATSUG1, RPT6A	regulatory particle triple-A ATPase 6A	STRINGENT	STRINGENT	STRINGENT	YES	YES	YES	YES	3'UTR,3'UTR,3'UTR	NO	3'UTR	3'UTR	Stop codon	NO
AT5G20020	P41917	RAN2	RAN2	RAS-related GTP-binding nuclear protein 2	STRINGENT	STRINGENT	STRINGENT	YES	YES	YES	YES	3'UTR	3'UTR	3'UTR	3'UTR	Stop codon	NO
AT5G20060	Q8L9X1	AT5G20060		alpha/beta-Hydrolases superfamily protein	STRINGENT	STRINGENT	STRINGENT	YES	NO	YES	YES	3'UTR,3'UTR,3'UTR,3'UTR	CDS	3'UTR	3'UTR	Stop codon	3'UTR
AT5G20070	Q94A82	NUDX19	ATNUDT19, ATNUDX19, NUDX19	nudix hydrolase homolog 19	STRINGENT	STRINGENT	STRINGENT	YES	YES	YES	YES	3'UTR	NO	NO	NO	Stop codon	3'UTR
AT5G20080	P83291	AT5G20080		FAD/NAD(P)-binding oxidoreductase	STRINGENT	STRINGENT	STRINGENT	YES	YES	YES	YES	3'UTR	NO	3'UTR	3'UTR	3' UTR	3'UTR
AT5G20090	B3H6E6, Q949R9	AT5G20090	AtMPC1, MPC1	Uncharacterized protein family (UPF0041)	STRINGENT	N.A.	STRINGENT	NO	NO	YES	YES	3'UTR,3'UTR,3'UTR,3'UTR	NO	3'UTR	3'UTR	Stop codon	3'UTR
AT5G20160	F4K455, F4K456, Q94AF6	AT5G20160		Ribosomal protein L7Ae/L30e/S12e/Gadd45 family protein	STRINGENT	STRINGENT	STRINGENT	YES	YES	YES	YES	3'UTR,3'UTR	NO	3'UTR	3'UTR	NO	3'UTR
AT5G20165	A8MSB3, F4K459, Q6IDB1	AT5G20165		kish-A-like protein	STRINGENT	N.A.	STRINGENT	NO	NO	YES	YES	3'UTR,3'UTR,3'UTR,3'UTR	NO	3'UTR	3'UTR	3' UTR	3'UTR
AT5G20180	Q8W464	AT5G20180		Ribosomal protein L36	STRINGENT	STRINGENT	STRINGENT	YES	NO	YES	YES	3'UTR,3'UTR,3'UTR,3'UTR	NO	3'UTR	3'UTR	NO	NO
AT5G20280	Q94BT0	SPS1F	ATSPS1F, SPS1F, SPSA1	sucrose phosphate synthase 1F	STRINGENT	STRINGENT	STRINGENT	YES	YES	YES	YES	3'UTR	3'UTR	3'UTR	3'UTR	Stop codon	3'UTR
AT5G20290	Q93VG5	AT5G20290		Ribosomal protein S8e family protein	STRINGENT	STRINGENT	STRINGENT	YES	YES	YES	YES	3'UTR	NO	3'UTR	3'UTR, CDS, 5'UTR	Stop codon	NO
AT5G20500	Q8LFQ6	AT5G20500		Glutaredoxin family protein	STRINGENT	STRINGENT	STRINGENT	YES	YES	YES	YES	3'UTR	3'UTR	3'UTR	3'UTR	Stop codon	NO
AT5G20520	Q8RXP6	WAV2	WAV2	alpha/beta-Hydrolases superfamily protein	STRINGENT	STRINGENT	STRINGENT	YES	YES	YES	YES	3'UTR	3'UTR	3'UTR	3'UTR	3' UTR	3'UTR
AT5G20570	F4K5K0, F4K5K1, Q940X7	RBX1	ATRBX1, HRT1, RBX1, ROC1	RING-box 1	STRINGENT	N.A.	STRINGENT	NO	NO	NO	YES	3'UTR,3'UTR,3'UTR	NO	3'UTR	3'UTR	Stop codon	3'UTR
AT5G20720	O65282	CPN20	ATCPN21, CHCPN10, CPN10, CPN20, CPN21	chaperonin 20	STRINGENT	STRINGENT	STRINGENT	YES	YES	YES	YES	3'UTR,3'UTR,3'UTR	NO	3'UTR	3'UTR, CDS, 5'UTR	Stop codon	NO
AT5G20890	Q940P8	AT5G20890		TCP-1/cpn60 chaperonin family protein	STRINGENT	STRINGENT	STRINGENT	YES	YES	YES	YES	3'UTR	NO	3'UTR	3'UTR	Stop codon	3'UTR
AT5G20900	Q9C5K8	JAZ12	JAZ12, TIFY3B	jasmonate-zim-domain protein 12	STRINGENT	STRINGENT	N.A.	YES	NO	NO	NO	3'UTR	3'UTR	3'UTR	3'UTR	3' UTR	3'UTR
AT5G20920	Q41969, Q41969-2	EIF2 BETA	eIF-2bs, EIF2 BETA, EMB1401	eukaryotic translation initiation factor 2 beta subunit	STRINGENT	STRINGENT	STRINGENT	YES	YES	YES	YES	3'UTR,3'UTR,3'UTR	NO	3'UTR	3'UTR	Stop codon	3'UTR
AT5G21090	Q9FPJ5	AT5G21090		Leucine-rich repeat (LRR) family protein	STRINGENT	STRINGENT	STRINGENT	YES	YES	YES	YES	3'UTR	NO	3'UTR	3'UTR	3' UTR	NO
AT5G21274	Q03509	CAM6	ACAM-6, CAM6	calmodulin 6	STRINGENT	STRINGENT	STRINGENT	YES	YES	YES	YES	3'UTR	NO	3'UTR	3'UTR	Stop codon	3'UTR
AT5G21326	Q84VQ3	CIPK26	CIPK26	Ca2 regulated serine-threonine protein kinase family protein	STRINGENT	STRINGENT	N.A.	YES	NO	NO	NO	3'UTR	NO	3'UTR	3'UTR	Stop codon	3'UTR
AT5G21430	Q84VQ4, Q84VQ4-2	NdhU	CRRL, NdhU	Chaperone DnaJ-domain superfamily protein	STRINGENT	STRINGENT	N.A.	YES	YES	NO	NO	3'UTR,3'UTR	3'UTR	3'UTR	3'UTR	NO	NO
AT5G22000	A0A1P8BEK7, Q9ZT42, Q9ZT42-2	RHF2A	RHF2A	RING-H2 group F2A	STRINGENT	N.A.	STRINGENT	NO	NO	YES	YES	3'UTR,3'UTR,3'UTR,3'UTR	3'UTR	3'UTR	3'UTR	3' UTR	3'UTR
AT5G22080	F4K8E9, Q9C580	AT5G22080		Chaperone DnaJ-domain superfamily protein	STRINGENT	N.A.	STRINGENT	NO	NO	YES	YES	3'UTR,3'UTR	NO	3'UTR	3'UTR	Stop codon, CDS	3'UTR
AT5G22280	B3H5W3, F4K8H6, Q9FMS3	AT5G22280		peptidyl-prolyl cis-trans isomerase G	STRINGENT	STRINGENT	STRINGENT	YES	YES	YES	YES	3'UTR,3'UTR,3'UTR	NO	3'UTR	3'UTR	NO	3'UTR
AT5G22340	F4K9U7, Q84TE7	AT5G22340		NF-kappa-B inhibitor-like protein	STRINGENT	STRINGENT	STRINGENT	YES	YES	YES	YES	3'UTR,3'UTR	3'UTR	3'UTR	3'UTR	3' UTR	3'UTR
AT5G22360	Q9FMR5	VAMP714	ATVAMP714, VAMP714	vesicle-associated membrane protein 714	STRINGENT	STRINGENT	STRINGENT	YES	NO	YES	YES	3'UTR	NO	3'UTR	3'UTR	NO	3'UTR
AT5G22440	P59231	AT5G22440		Ribosomal protein L1p/L10e family	STRINGENT	STRINGENT	STRINGENT	YES	YES	YES	YES	3'UTR,3'UTR	NO	3'UTR	3'UTR	NO	3'UTR
AT5G22640	A0A1P8BBB7, F4K9Z1, Q8LPR8	emb1211	emb1211, TIC100	MORN (Membrane Occupation and Recognition Nexus) repeat-containing protein	STRINGENT	STRINGENT	STRINGENT	YES	YES	YES	NO	3'UTR,3'UTR,3'UTR	NO	3'UTR	3'UTR	CDS, Stop codon	3'UTR
AT5G22650	Q56WH4, Q56WH4-2	HD2B	ATHD2, ATHD2B, HD2, HD2B, HDA4, HDT02, HDT2	histone deacetylase 2B	STRINGENT	STRINGENT	STRINGENT	YES	NO	YES	YES	3'UTR,3'UTR	5'UTR	3'UTR	3'UTR	Stop codon	NO
AT5G23040	Q9FN50	1	CDF1, CPP1	cell growth defect factor-like protein (DUF3353)	STRINGENT	STRINGENT	N.A.	YES	YES	NO	NO	3'UTR,3'UTR	NO	3'UTR	3'UTR, CDS	Stop codon	3'UTR
AT5G23060	A0A1P8BCX7, Q9FN48	CaS	CaS	calcium sensing receptor	STRINGENT	STRINGENT	N.A.	NO	YES	NO	NO	3'UTR,3'UTR	CDS	3'UTR	3'UTR	NO	NO
AT5G23120	A0A1P8BG37, O82660	HCF136	HCF136	photosystem II stability/assembly factor, chloroplast (HCF136)	STRINGENT	STRINGENT	N.A.	YES	NO	NO	NO	3'UTR,3'UTR	NO	3'UTR	3'UTR, CDS	Stop codon	NO
AT5G23290	P57742	PFD5	PFD5	prefoldin 5	STRINGENT	STRINGENT	STRINGENT	YES	YES	YES	YES	3'UTR	NO	3'UTR	3'UTR	NO	3'UTR
AT5G23535	Q9LT09	AT5G23535		KOW domain-containing protein	STRINGENT	STRINGENT	STRINGENT	YES	YES	YES	YES	3'UTR,3'UTR	NO	NO	3'UTR	NO	3'UTR
AT5G23540	A8MR12, Q9LT08	AT5G23540		Mov34/MPN/PAD-1 family protein	STRINGENT	STRINGENT	STRINGENT	YES	YES	YES	YES	3'UTR,3'UTR	NO	3'UTR	3'UTR	Stop codon	3'UTR
AT5G23740	P42733	RPS11-BETA	RPS11-BETA	ribosomal protein S11-beta	STRINGENT	STRINGENT	STRINGENT	YES	YES	YES	YES	3'UTR	5'UTR	3'UTR	3'UTR	Stop codon	NO
AT5G23820	Q9FF98	AT5G23820	ML3	MD-2-related lipid recognition domain-containing protein	STRINGENT	STRINGENT	STRINGENT	YES	NO	YES	YES	3'UTR	NO	NO	NO	NO	NO
AT5G23900	Q9FF90	AT5G23900		Ribosomal protein L13e family protein	STRINGENT	STRINGENT	STRINGENT	YES	YES	YES	YES	3'UTR	NO	3'UTR	3'UTR	Stop codon	NO
AT5G24650	Q9FLT9	AT5G24650	HP30-2, Tric2	Mitochondrial import inner membrane translocase subunit Tim17/Tim22/Tim23 family protein	STRINGENT	STRINGENT	STRINGENT	YES	YES	YES	YES	3'UTR	NO	3'UTR	3'UTR	Stop codon	3'UTR
AT5G24690	Q93W02, Q9FIR6	AT5G24690		plant/protein, putative (DUF3411)	STRINGENT	STRINGENT	STRINGENT	YES	YES	YES	YES	3'UTR	CDS	3'UTR	3'UTR	NO	3'UTR
AT5G25100	F4KIM7, Q9C5N2	AT5G25100	TMN9	Endomembrane protein 70 protein family	STRINGENT	STRINGENT	STRINGENT	YES	YES	YES	YES	3'UTR,3'UTR	NO	3'UTR	3'UTR	NO	NO
AT5G25270	F4JWQ4	AT5G25270		Ubiquitin-like superfamily protein	STRINGENT	STRINGENT	STRINGENT	YES	NO	YES	NO	3'UTR	NO	NO	3'UTR	coding_intron	NO
AT5G25360	A0A1P8BAD1, Q84JY4	AT5G25360		hypothetical protein	STRINGENT	STRINGENT	STRINGENT	YES	NO	YES	YES	3'UTR,3'UTR,3'UTR	NO	3'UTR	3'UTR	NO	3'UTR
AT5G25940	Q8LD96, Q9XGZ3	AT5G25940		early nodulin-like protein	STRINGENT	STRINGENT	STRINGENT	YES	YES	YES	YES	3'UTR	3'UTR	3'UTR	3'UTR	NO	3'UTR
AT5G26360	Q84WV1	AT5G26360		TCP-1/cpn60 chaperonin family protein	STRINGENT	STRINGENT	STRINGENT	YES	YES	YES	YES	3'UTR	3'UTR	3'UTR	3'UTR	Stop codon	3'UTR
AT5G26667	A0A178UDQ9, O04905, O04905-2	PYR6	PYR6	P-loop containing nucleoside triphosphate hydrolases superfamily protein	STRINGENT	STRINGENT	STRINGENT	YES	YES	YES	YES	3'UTR,3'UTR,3'UTR	3'UTR	3'UTR	3'UTR	NO	3'UTR
AT5G26742	A0A178URN6, F4K180, Q8L7S8, Q8L7S8-2	emb1138	AtRH3, emb1138, RH3	DEAD box RNA helicase (RH3)	STRINGENT	STRINGENT	STRINGENT	YES	YES	YES	YES	3'UTR,3'UTR,3'UTR	3'UTR	3'UTR	3'UTR	NO	NO
AT5G26780	Q94C74, Q94C74-2	SHM2	SHM2	serine hydroxymethyltransferase 2	STRINGENT	STRINGENT	STRINGENT	YES	NO	YES	YES	3'UTR,3'UTR,3'UTR,3'UTR	3'UTR	3'UTR	3'UTR	3' UTR	3'UTR
AT5G26800					STRINGENT	STRINGENT	STRINGENT	YES	YES	YES	YES	3'UTR	3'UTR	3'UTR	3'UTR	NO	NO
AT5G26830	O04630, O04630-2	AT5G26830		Threonyl-tRNA synthetase	STRINGENT	STRINGENT	STRINGENT	YES	YES	YES	YES	3'UTR	3'UTR	3'UTR	3'UTR, CDS	Stop codon	3'UTR
AT5G27380	P46416	GSH2	AtGSH2, GSH2, GSHB	glutathione synthetase 2	STRINGENT	STRINGENT	STRINGENT	YES	YES	YES	YES	3'UTR	NO	3'UTR	3'UTR	Stop codon	3'UTR
AT5G27430	Q53YF3	AT5G27430		Signal peptidase subunit	STRINGENT	STRINGENT	STRINGENT	YES	YES	YES	YES	3'UTR	NO	3'UTR	3'UTR	coding_intron, Stop codon	3'UTR
AT5G27470	Q39230	AT5G27470		seryl-tRNA synthetase / serine-tRNA ligase	STRINGENT	STRINGENT	STRINGENT	YES	YES	YES	YES	3'UTR	NO	3'UTR	3'UTR	Stop codon	3'UTR
AT5G27640	F4K4D5, Q56ZP3, Q9C5Z1	TIF3B1	ATEIF3B-1, ATTIF3B1, EIF3B, EIF3B-1, TIF3B1	translation initiation factor 3B1	STRINGENT	STRINGENT	STRINGENT	YES	YES	YES	YES	3'UTR,3'UTR,3'UTR	3'UTR	3'UTR	3'UTR	Stop codon	3'UTR
AT5G27700	Q3E902	AT5G27700	EVR1L1, RPS21C	Ribosomal protein S21e	STRINGENT	STRINGENT	STRINGENT	YES	YES	YES	YES	3'UTR	NO	3'UTR	3'UTR, CDS	Stop codon	NO
AT5G27720	F4K4E3	emb1644	emb1644, LSM4	Small nuclear ribonucleoprotein family protein	STRINGENT	STRINGENT	STRINGENT	YES	NO	YES	YES	3'UTR	3'UTR	3'UTR	3'UTR	NO	NO
AT5G27760	A0A1P8BCY5, Q8LG60	AT5G27760	AtHIGD2	Hypoxia-responsive family protein	STRINGENT	STRINGENT	STRINGENT	YES	NO	YES	YES	3'UTR,3'UTR	3'UTR	3'UTR	3'UTR	NO	3'UTR
AT5G27770	Q9FE58	AT5G27770		Ribosomal L22e protein family	STRINGENT	STRINGENT	STRINGENT	YES	YES	YES	YES	3'UTR	NO	3'UTR	3'UTR	Stop codon	NO
AT5G27850	A0A1P8BGQ0, Q940B0	AT5G27850	RPL18C	Ribosomal protein L18e/L15 superfamily protein	STRINGENT	STRINGENT	STRINGENT	YES	YES	YES	YES	3'UTR,3'UTR	NO	3'UTR	3'UTR	Stop codon	NO
AT5G28050	A0A1P8BAA4, F4K5T6, Q94BU8	AT5G28050	GSDA	Cytidine/deoxycytidylate deaminase family protein	STRINGENT	STRINGENT	STRINGENT	YES	YES	YES	YES	3'UTR,3'UTR,3'UTR	NO	NO	3'UTR	NO	3'UTR
AT5G28060	A0A178US36, Q8LC83	AT5G28060	RPS24B	Ribosomal protein S24e family protein	STRINGENT	STRINGENT	STRINGENT	YES	YES	YES	YES	5'UTR,3'UTR	3'UTR	3'UTR	3'UTR	Stop codon	3'UTR
AT5G28750	Q9LKU2	AT5G28750		Bacterial sec-independent translocation protein mttA/Hcf106	STRINGENT	STRINGENT	N.A.	YES	YES	NO	NO	3'UTR	NO	3'UTR	3'UTR	Stop codon	3'UTR
AT5G30510	C0Z2U7, Q93VC7	RPS1	ARRPS1, PRPS1, RPS1	ribosomal protein S1	STRINGENT	STRINGENT	STRINGENT	YES	YES	YES	YES	3'UTR	NO	3'UTR	3'UTR, 5'UTR	Stop codon	3'UTR
AT5G33320	Q8RXN3	CUE1	ARAPPT, CUE1, NOX1, PPT	Glucose-6-phosphate/phosphate translocator-like protein	STRINGENT	STRINGENT	STRINGENT	YES	YES	YES	YES	3'UTR	NO	CDS, 3'UTR	3'UTR	Stop codon	3'UTR
AT5G34850	Q949Y3	PAP26	ATPAP26, PAP26	purple acid phosphatase 26	STRINGENT	STRINGENT	STRINGENT	YES	YES	YES	YES	3'UTR	NO	3'UTR	3'UTR	3' UTR, Stop codon	3'UTR
AT5G35100	A0A1P8B9P2, O65220, O65220-2	AT5G35100		Cyclophilin-like peptidyl-prolyl cis-trans isomerase family protein	STRINGENT	STRINGENT	N.A.	YES	NO	NO	NO	3'UTR,3'UTR,3'UTR	NO	NO	3'UTR, CDS	CDS	NO
AT5G35170	F4JYC0, Q56YE6, Q8VYL1	AT5G35170		adenylate kinase family protein	STRINGENT	STRINGENT	N.A.	YES	YES	NO	NO	3'UTR,3'UTR	NO	3'UTR	3'UTR	Stop codon	NO
AT5G35180	A0A1P8BH65, B3H5W6, B3H745, F4JYC1, Q8W553	AT5G35180		ENHANCED DISEASE RESISTANCE protein (DUF1336)	STRINGENT	STRINGENT	STRINGENT	YES	NO	YES	NO	3'UTR,3'UTR,3'UTR,3'UTR	3'UTR	3'UTR	5'UTR, CDS, 3'UTR	Stop codon	3'UTR
AT5G35360	F4JYE0, F4JYE1, O04983	CAC2	CAC2	acetyl Co-enzyme a carboxylase biotin carboxylase subunit	STRINGENT	STRINGENT	STRINGENT	YES	YES	YES	YES	3'UTR,3'UTR,3'UTR,3'UTR,3'UTR	3'UTR	3'UTR	3'UTR	Stop codon	3'UTR
AT5G35530	Q9FJA6	AT5G35530		Ribosomal protein S3 family protein	STRINGENT	STRINGENT	STRINGENT	YES	YES	YES	YES	3'UTR	NO	3'UTR	3'UTR, 5'UTR	Stop codon	3'UTR
AT5G35590	O81146	PAA1	PAA1	proteasome alpha subunit A1	STRINGENT	STRINGENT	STRINGENT	YES	YES	YES	YES	3'UTR	NO	3'UTR	3'UTR	Stop codon	NO
AT5G35620	O04663, O04663-2	LSP1	EIF(ISO)4E, EIF4E2, eIFiso4E, LSP, LSP1	Eukaryotic initiation factor 4E protein	STRINGENT	STRINGENT	STRINGENT	YES	NO	YES	YES	3'UTR,3'UTR,3'UTR,3'UTR,3'UTR	NO	3'UTR	3'UTR	Stop codon	3'UTR
AT5G35630	Q43127, Q56ZK3	GS2	ATGSL1, GLN2, GS2	glutamine synthetase 2	STRINGENT	STRINGENT	STRINGENT	YES	YES	YES	YES	3'UTR,3'UTR,3'UTR	NO	3'UTR	3'UTR, 5'UTR, CDS	Stop codon	NO
AT5G35970	F4K1G7, Q9FGC2	AT5G35970		P-loop containing nucleoside triphosphate hydrolases superfamily protein	STRINGENT	STRINGENT	STRINGENT	YES	YES	YES	YES	3'UTR	3'UTR	3'UTR	3'UTR	Stop codon	NO
AT5G35980	A0A1P8BH92, Q8RWH3, Q9FGC0	YAK1	YAK1	YAK1-like protein 1	STRINGENT	STRINGENT	STRINGENT	YES	YES	YES	YES	3'UTR,3'UTR	NO	3'UTR	3'UTR	Stop codon	3'UTR
AT5G36160	Q9LVY1	AT5G36160	AtTAT2, TAT2	Tyrosine transaminase family protein	STRINGENT	STRINGENT	STRINGENT	YES	NO	YES	YES	3'UTR	3'UTR	3'UTR	3'UTR	Stop codon	3'UTR
AT5G36230	A0A1P8BB34, Q93ZC2	AT5G36230		ARM repeat superfamily protein	STRINGENT	STRINGENT	STRINGENT	YES	YES	YES	YES	3'UTR,3'UTR	NO	3'UTR	3'UTR	Stop codon	3'UTR
AT5G36290	Q93Y38	AT5G36290		Uncharacterized protein family (UPF0016)	STRINGENT	STRINGENT	STRINGENT	YES	NO	YES	YES	3'UTR,3'UTR	StopCodon, 3'UTR	3'UTR	3'UTR	NO	3'UTR
AT5G36880	A0A1P8BCV2, B9DGD6, B9DGD6-2	ACS	ACS	acetyl-CoA synthetase	STRINGENT	STRINGENT	STRINGENT	YES	YES	YES	YES	3'UTR,3'UTR,3'UTR,3'UTR,3'UTR,3'UTR	NO	3'UTR	3'UTR	Stop codon	3'UTR
AT5G37360	Q93Z11, Q9FHS9	AT5G37360		LOW protein: ammonium transporter 1-like protein	STRINGENT	STRINGENT	N.A.	YES	YES	NO	NO	3'UTR	NO	3'UTR	3'UTR	Stop codon	3'UTR
AT5G37510	B9DFQ9, Q9FGI6	EMB1467	CI76, EMB1467	NADH-ubiquinone dehydrogenase	STRINGENT	STRINGENT	STRINGENT	YES	YES	YES	YES	3'UTR,3'UTR,CDS,3'UTR,3'UTR	NO	3'UTR, CDS	3'UTR	Stop codon	3'UTR
AT5G37780	A0A1P8BAP4, F4K8M2, F4K8M3, P0DH96	CAM1	ACAM-1, CAM1, TCH1	calmodulin 1	STRINGENT	STRINGENT	STRINGENT	YES	YES	YES	YES	3'UTR,3'UTR,3'UTR,3'UTR	NO	3'UTR	3'UTR, CDS	Stop codon	NO
AT5G38410	B3H5S2, F4KA76, P10798	RBCS3B	RBCS3B	Ribulose bisphosphate carboxylase (small chain) family protein	STRINGENT	STRINGENT	N.A.	YES	YES	NO	NO	CDS,CDS,CDS,3'UTR,3'UTR,3'UTR	NO	3'UTR	5'UTR, 3'UTR, CDS	NO	NO
AT5G38470	A8MR76, Q84L30, Q84L30-2	RAD23D	RAD23D	Rad23 UV excision repair protein family	STRINGENT	STRINGENT	STRINGENT	YES	YES	YES	YES	CDS,3'UTR,3'UTR,3'UTR	NO	CDS, 3'UTR	3'UTR	Stop codon	3'UTR
AT5G38480	P42644, P42644-2	GRF3	GRF3, RCI1	general regulatory factor 3	STRINGENT	STRINGENT	STRINGENT	YES	NO	YES	YES	3'UTR,3'UTR,3'UTR	3'UTR	3'UTR	3'UTR	Stop codon	3'UTR
AT5G38660	A0A219HZL6, Q2HIR7	APE1	APE1	acclimation of photosynthesis to environment	STRINGENT	STRINGENT	STRINGENT	YES	YES	NO	YES	CDS,3'UTR	NO	3'UTR	3'UTR, CDS	Stop codon, coding_intron	3'UTR
AT5G38830	B3LFA4	AT5G38830		Cysteinyl-tRNA synthetase, class Ia family protein	STRINGENT	STRINGENT	STRINGENT	YES	NO	YES	NO	3'UTR	NO	NO	3'UTR	NO	3'UTR
AT5G39510	Q9SEL6	SGR4	ATVTI11, ATVTI1A, ITT3, SGR4, VTI11, VTI1A, ZIG, ZIG1	Vesicle transport v-SNARE family protein	STRINGENT	STRINGENT	STRINGENT	YES	NO	YES	NO	3'UTR	StopCodon, 3'UTR	3'UTR	3'UTR, 5'UTR	Stop codon	3'UTR
AT5G39570	A0A2H1ZE89, Q8L7C5	AT5G39570	PLDrp1	transmembrane protein	STRINGENT	STRINGENT	STRINGENT	YES	YES	YES	YES	CDS,CDS,3'UTR,3'UTR	NO	CDS, 3'UTR	3'UTR, 5'UTR, CDS	3' UTR	NO
AT5G39590	C0Z332, Q9FKA3	AT5G39590		TLD-domain containing nucleolar protein	STRINGENT	STRINGENT	STRINGENT	YES	NO	YES	NO	3'UTR	NO	3'UTR	3'UTR	Stop codon	3'UTR
AT5G39730	Q9FIX1	AT5G39730		AIG2-like (avirulence induced gene) family protein	STRINGENT	N.A.	STRINGENT	NO	NO	NO	YES	3'UTR	NO	3'UTR	3'UTR	NO	3'UTR
AT5G39740	P49227	RPL5B	OLI7, RPL5B	ribosomal protein L5 B	STRINGENT	STRINGENT	STRINGENT	YES	YES	YES	YES	CDS,CDS,3'UTR,3'UTR	NO	3'UTR	3'UTR	Stop codon	NO
AT5G39950	Q38879	TRX2	ATH2, ATTRX2, ATTRXH2, TRX2, TRXH2	thioredoxin 2	STRINGENT	STRINGENT	STRINGENT	YES	YES	YES	YES	3'UTR	NO	3'UTR	3'UTR	Stop codon	3'UTR
AT5G40370	B3H604, Q9FNE2	GRXC2	AtGRXC2, GRX370, GRXC2	Glutaredoxin family protein	STRINGENT	STRINGENT	STRINGENT	YES	YES	YES	YES	CDS,CDS,3'UTR,3'UTR	NO	3'UTR	3'UTR, 5'UTR	Stop codon	NO
AT5G40670	P57758	AT5G40670		PQ-loop repeat family protein / transmembrane family protein	STRINGENT	N.A.	STRINGENT	NO	NO	YES	NO	3'UTR	NO	NO	3'UTR	Stop codon	3'UTR
AT5G40770	O04331	PHB3	ATPHB3, EER3, PHB3	prohibitin 3	STRINGENT	STRINGENT	STRINGENT	YES	YES	YES	YES	3'UTR	NO	3'UTR	3'UTR	NO	3'UTR
AT5G40810	Q9FKS5, Q9FKS5-2	AT5G40810		Cytochrome C1 family	STRINGENT	STRINGENT	STRINGENT	YES	YES	YES	YES	CDS,CDS,3'UTR,3'UTR	5'UTR	3'UTR	3'UTR	Stop codon	3'UTR
AT5G40950	Q9FLN4	RPL27	RPL27	ribosomal protein large subunit 27	STRINGENT	STRINGENT	STRINGENT	YES	YES	YES	YES	3'UTR	CDS, StartCodon	3'UTR	3'UTR, 5'UTR	Stop codon	NO
AT5G41010	Q9FLM8	NRPB12	NRPB12, NRPD12, NRPE12	DNA directed RNA polymerase, 7 kDa subunit	STRINGENT	STRINGENT	STRINGENT	YES	YES	YES	YES	3'UTR	NO	3'UTR	3'UTR	NO	NO
AT5G41520	A8MRV0, Q9FFS8	RPS10B	RPS10B	RNA binding Plectin/S10 domain-containing protein	STRINGENT	STRINGENT	STRINGENT	YES	YES	YES	YES	CDS,CDS,3'UTR,3'UTR	NO	3'UTR	3'UTR	NO	NO
AT5G41685	Q9ASY8	AT5G41685		Mitochondrial outer membrane translocase complex, subunit Tom7	STRINGENT	N.A.	STRINGENT	NO	NO	YES	NO	3'UTR	NO	3'UTR	3'UTR, 5'UTR	NO	NO
AT5G41700	B9DFD0, P35131, P35131-2, P35131-3	UBC8	ATUBC8, UBC8	ubiquitin conjugating enzyme 8	STRINGENT	STRINGENT	STRINGENT	YES	YES	YES	YES	3'UTR,3'UTR,3'UTR,3'UTR,3'UTR	NO	3'UTR	3'UTR, 5'UTR	Stop codon	NO
AT5G41950	Q9FHY8	AT5G41950	HLB1	Tetratricopeptide repeat (TPR)-like superfamily protein	STRINGENT	STRINGENT	STRINGENT	YES	NO	YES	YES	3'UTR	3'UTR	3'UTR	3'UTR	Stop codon	3'UTR
AT5G42070	Q8RWR9	AT5G42070		hypothetical protein	STRINGENT	STRINGENT	N.A.	YES	NO	NO	NO	3'UTR	NO	3'UTR	3'UTR	Stop codon	3'UTR
AT5G42080	F4K015, P42697, P42697-2	DL1	ADL1, ADL1A, AG68, DL1, DRP1A, RSW9	dynamin-like protein	STRINGENT	STRINGENT	STRINGENT	YES	YES	YES	YES	3'UTR,3'UTR,3'UTR,3'UTR,3'UTR	3'UTR	3'UTR	3'UTR	Stop codon	3'UTR
AT5G42190	Q9FHW7	AT5G42190	ASK2, SKP1B	E3 ubiquitin ligase SCF complex subunit SKP1/ASK1 family protein	STRINGENT	STRINGENT	STRINGENT	YES	YES	YES	YES	3'UTR	NO	3'UTR	3'UTR	NO	3'UTR
AT5G42270	C0Z226, Q9FH02	VAR1	FTSH5, VAR1	FtsH extracellular protease family	STRINGENT	STRINGENT	N.A.	YES	NO	NO	NO	3'UTR	CDS	CDS, 3'UTR	3'UTR, CDS	NO	NO
AT5G42300	Q9FGZ9	UBL5	UBL5	ubiquitin-like protein 5	STRINGENT	STRINGENT	STRINGENT	YES	YES	YES	YES	3'UTR	NO	3'UTR	3'UTR	Stop codon	3'UTR
AT5G42390	A0A1P8BEG1, Q9FIH8	SPP	SPP	Insulinase (Peptidase family M16) family protein	STRINGENT	STRINGENT	STRINGENT	YES	YES	YES	YES	3'UTR	3'UTR	3'UTR	3'UTR	3' UTR	3'UTR
AT5G42740	A0A1P8BG38, P34795	AT5G42740		Sugar isomerase (SIS) family protein	STRINGENT	STRINGENT	STRINGENT	YES	NO	YES	YES	3'UTR,3'UTR,3'UTR	NO	NO	3'UTR	Stop codon	3'UTR
AT5G42790	P34066	PAF1	ARS5, ATPSM30, PAF1	proteasome alpha subunit F1	STRINGENT	STRINGENT	STRINGENT	YES	YES	YES	YES	3'UTR	NO	3'UTR	3'UTR	Stop codon	NO
AT5G42890	Q9FMN0	SCP2	ATSCP2, SCP2	sterol carrier protein 2	STRINGENT	STRINGENT	STRINGENT	YES	YES	YES	YES	3'UTR	NO	3'UTR	3'UTR	NO	3'UTR
AT5G42980	Q42403	TRX3	ATH3, ATTRX3, ATTRXH3, TRX3, TRXH3	thioredoxin 3	STRINGENT	STRINGENT	STRINGENT	YES	NO	YES	YES	3'UTR	NO	3'UTR	3'UTR, 5'UTR, CDS	Stop codon	NO
AT5G42990	A0A178UKG2, Q9FMM0	UBC18	UBC18	ubiquitin-conjugating enzyme 18	STRINGENT	N.A.	STRINGENT	NO	NO	YES	YES	3'UTR	NO	3'UTR	3'UTR	Stop codon	3'UTR
AT5G43320	A0A1P8BBL3, Q9LSX4	ckl8	CK1.8, ckl8	casein kinase I-like 8	STRINGENT	STRINGENT	STRINGENT	YES	NO	YES	YES	3'UTR,3'UTR	3'UTR	3'UTR	3'UTR	Stop codon	3'UTR
AT5G43460	Q9LSW5	AT5G43460		HR-like lesion-inducing protein-like protein	STRINGENT	STRINGENT	STRINGENT	YES	YES	YES	YES	3'UTR,3'UTR	NO	CDS, 3'UTR	3'UTR	Stop codon	3'UTR
AT5G43780	Q9S7D8	APS4	APS4, ATPS4	Pseudouridine synthase/archaeosine transglycosylase-like family protein	STRINGENT	STRINGENT	STRINGENT	YES	NO	YES	YES	3'UTR	NO	3'UTR	3'UTR	Stop codon	3'UTR
AT5G43830	Q9FG81	AT5G43830		aluminum induced protein with YGL and LRDR motifs	STRINGENT	STRINGENT	STRINGENT	YES	YES	YES	YES	3'UTR	NO	3'UTR	3'UTR	Stop codon	NO
AT5G43940	F4K7D6, Q96533	HOT5	ADH2, ATGSNOR1, GSNOR, HOT5, PAR2	GroES-like zinc-binding dehydrogenase family protein	STRINGENT	STRINGENT	STRINGENT	YES	YES	YES	YES	3'UTR,3'UTR	NO	CDS, 3'UTR	3'UTR, CDS	Stop codon	NO
AT5G43970	Q9FNC9	TOM22-V	ATTOM22-V, TOM22-V, TOM9-2	translocase of outer membrane 22-V	STRINGENT	STRINGENT	STRINGENT	YES	YES	YES	YES	3'UTR	NO	3'UTR	3'UTR	NO	NO
AT5G44020	Q9FNC4	AT5G44020		HAD superfamily, subfamily IIIB acid phosphatase	STRINGENT	N.A.	STRINGENT	NO	NO	YES	NO	3'UTR	NO	NO	3'UTR, CDS	NO	NO
AT5G44340	P24636	TUB4	TUB4	tubulin beta chain 4	STRINGENT	STRINGENT	STRINGENT	YES	YES	YES	YES	3'UTR	NO	3'UTR	3'UTR	Stop codon	NO
AT5G45170	A0A1P8BBQ8, Q6NMA9, Q9FKE8	AT5G45170		Haloacid dehalogenase-like hydrolase (HAD) superfamily protein	STRINGENT	STRINGENT	STRINGENT	YES	YES	YES	NO	3'UTR,3'UTR	NO	3'UTR	3'UTR	NO	3'UTR
AT5G45390	Q94B60	CLPP4	CLPP4, NCLPP4	CLP protease P4	STRINGENT	STRINGENT	STRINGENT	YES	YES	YES	YES	3'UTR	NO	3'UTR	3'UTR	CDS, 3' UTR	3'UTR
AT5G45410	Q9FHJ5	AT5G45410	AtNHR2A	zinc finger B-box protein	STRINGENT	N.A.	STRINGENT	NO	NO	YES	YES	3'UTR,3'UTR,3'UTR,3'UTR,3'UTR	NO	3'UTR, CDS	3'UTR	Stop codon	3'UTR
AT5G45430	F4KD80, Q8H0X4	AT5G45430		Protein kinase superfamily protein	STRINGENT	STRINGENT	STRINGENT	YES	YES	YES	YES	3'UTR	CDS	3'UTR	3'UTR	NO	NO
AT5G45550	Q9FHI1	MOB1-like	MOB1-like, MOB1A	Mob1/phocein family protein	STRINGENT	STRINGENT	STRINGENT	YES	NO	YES	NO	3'UTR	NO	3'UTR	3'UTR	NO	3'UTR
AT5G45620	F4KEK8, Q8RWF0	AT5G45620		Proteasome component (PCI) domain protein	STRINGENT	STRINGENT	STRINGENT	YES	YES	YES	YES	3'UTR,3'UTR	NO	3'UTR	3'UTR	Stop codon	3'UTR
AT5G45680	Q9SCY2	FKBP13	ATFKBP13, FKBP13	FK506-binding protein 13	STRINGENT	STRINGENT	N.A.	YES	NO	NO	NO	3'UTR	3'UTR	3'UTR	3'UTR	NO	3'UTR
AT5G45775	P42794, P42794-2	AT5G45775		Ribosomal L5P family protein	STRINGENT	STRINGENT	STRINGENT	YES	YES	YES	YES	3'UTR,3'UTR	NO	3'UTR	3'UTR	NO	NO
AT5G46020	Q9FNM0	AT5G46020	MUSE7	28 kDa heat/acid-stable phosphoprotein-like protein	STRINGENT	STRINGENT	STRINGENT	YES	YES	YES	YES	3'UTR	CDS	3'UTR	3'UTR	Stop codon	3'UTR
AT5G46030	Q8LEF3	AT5G46030		transcription elongation factor-like protein	STRINGENT	STRINGENT	STRINGENT	YES	YES	YES	YES	3'UTR,3'UTR,3'UTR	NO	3'UTR	3'UTR	NO	3'UTR
AT5G46110	A0A219HYB6, A0A219HZH3, A0A219I0W9, Q9ZSR7	APE2	APE2, TPT	Glucose-6-phosphate/phosphate translocator-like protein	STRINGENT	STRINGENT	N.A.	YES	YES	NO	NO	3'UTR,3'UTR,3'UTR,3'UTR	3'UTR	3'UTR	3'UTR, CDS, 5'UTR	NO	NO
AT5G46210	Q8LGH4	CUL4	ATCUL4, CUL4	cullin4	STRINGENT	N.A.	STRINGENT	NO	NO	YES	NO	3'UTR	NO	3'UTR	3'UTR, CDS	Stop codon	3'UTR
AT5G46250	Q94A38, Q94A38-2, Q94A38-3	LARP6a	AtLARP6a, LARP6a	RNA-binding protein	STRINGENT	STRINGENT	STRINGENT	YES	YES	YES	YES	3'UTR,3'UTR,3'UTR	3'UTR	3'UTR	3'UTR	Stop codon	3'UTR
AT5G46290	F4KHF4, P52410, P52410-2	KASI	KAS1, KASI	3-ketoacyl-acyl carrier protein synthase I	STRINGENT	STRINGENT	STRINGENT	YES	YES	YES	YES	3'UTR,3'UTR,3'UTR	NO	3'UTR	3'UTR	3' UTR	3'UTR
AT5G46430	Q9FHG2	AT5G46430		Ribosomal protein L32e	STRINGENT	STRINGENT	STRINGENT	YES	YES	YES	YES	3'UTR,3'UTR	3'UTR	3'UTR	3'UTR	Stop codon	NO
AT5G46630	F4KHJ7, O23140	AT5G46630	AP2M	Clathrin adaptor complexes medium subunit family protein	STRINGENT	STRINGENT	STRINGENT	YES	YES	YES	YES	3'UTR,3'UTR	NO	3'UTR	3'UTR	NO	3'UTR
AT5G46800	Q93XM7	BOU	BOU	Mitochondrial substrate carrier family protein	STRINGENT	STRINGENT	STRINGENT	YES	NO	YES	NO	3'UTR,3'UTR,3'UTR	NO	3'UTR	3'UTR	Stop codon	NO
AT5G47030	Q96252	AT5G47030		ATPase, F1 complex, delta/epsilon subunit	STRINGENT	STRINGENT	STRINGENT	YES	YES	YES	YES	3'UTR	NO	3'UTR	3'UTR	Stop codon	NO
AT5G47110	Q6NKS4	LIL3:2	LIL3:2	Chlorophyll A-B binding family protein	STRINGENT	STRINGENT	N.A.	YES	NO	NO	NO	3'UTR	NO	3'UTR	3'UTR, 5'UTR	NO	NO
AT5G47120	Q9LD45	BI1	ATBI-1, ATBI1, BI-1, BI1	BAX inhibitor 1	STRINGENT	STRINGENT	STRINGENT	YES	YES	YES	YES	3'UTR	NO	3'UTR	3'UTR	Stop codon	NO
AT5G47190	Q8RXX5	AT5G47190	PRPL19	Ribosomal protein L19 family protein	STRINGENT	STRINGENT	N.A.	YES	YES	NO	NO	3'UTR	CDS	3'UTR	3'UTR	Stop codon	3'UTR
AT5G47200	Q9FPJ4	RAB1A	ATRAB1A, ATRABD2B, RAB1A	RAB GTPase homolog 1A	STRINGENT	STRINGENT	STRINGENT	YES	YES	YES	YES	3'UTR	NO	3'UTR	3'UTR	NO	3'UTR
AT5G47210	Q9LVT8, Q9LVT8-2, Q9LVT8-3	AT5G47210		Hyaluronan / mRNA binding family	STRINGENT	STRINGENT	STRINGENT	YES	YES	YES	YES	3'UTR,3'UTR,3'UTR	NO	3'UTR, CDS	3'UTR, CDS	Stop codon	3'UTR
AT5G47310	Q9LVS8	AT5G47310		PPPDE putative thiol peptidase family protein	STRINGENT	STRINGENT	STRINGENT	YES	YES	YES	YES	3'UTR	3'UTR	3'UTR	3'UTR	Stop codon	3'UTR
AT5G47435	Q93YQ3	AT5G47435		formyltetrahydrofolate deformylase	STRINGENT	STRINGENT	STRINGENT	YES	YES	YES	YES	CDS,CDS,3'UTR,3'UTR,3'UTR	NO	CDS	3'UTR, CDS	Stop codon	3'UTR
AT5G47540	Q9FGK3	AT5G47540		Mo25 family protein	STRINGENT	N.A.	STRINGENT	NO	NO	YES	YES	3'UTR	NO	NO	3'UTR	Stop codon	3'UTR
AT5G47570	Q9FGK0	AT5G47570		NADH dehydrogenase ubiquinone 1 beta subcomplex subunit	STRINGENT	STRINGENT	STRINGENT	YES	YES	YES	YES	3'UTR	NO	3'UTR	3'UTR	Stop codon	3'UTR
AT5G47700	Q8LEQ0	AT5G47700	RPP1.3, RPP1C	60S acidic ribosomal protein family	STRINGENT	STRINGENT	STRINGENT	YES	YES	YES	YES	3'UTR,3'UTR	NO	3'UTR	3'UTR	NO	NO
AT5G47770	Q09152, Q09152-2	FPS1	FPS1	farnesyl diphosphate synthase 1	STRINGENT	STRINGENT	STRINGENT	YES	NO	YES	YES	3'UTR	NO	3'UTR	3'UTR	Stop codon	3'UTR
AT5G47840	A0A1P8B9K9, Q9FIJ7	AMK2	AMK2	adenosine monophosphate kinase	STRINGENT	STRINGENT	STRINGENT	YES	YES	YES	NO	3'UTR,3'UTR	3'UTR	3'UTR	3'UTR	3' UTR	3'UTR
AT5G47870	Q9FIJ4	RAD52-2	ODB2, RAD52-2, RAD52-2B	cobalt ion-binding protein	STRINGENT	STRINGENT	STRINGENT	YES	YES	YES	NO	3'UTR	NO	NO	3'UTR	NO	3'UTR
AT5G47890	Q9FIJ2	AT5G47890		NADH-ubiquinone oxidoreductase B8 subunit	STRINGENT	STRINGENT	STRINGENT	YES	YES	YES	YES	3'UTR	NO	3'UTR	3'UTR	Stop codon	3'UTR
AT5G47930	Q8L953	AT5G47930		Zinc-binding ribosomal protein family protein	STRINGENT	STRINGENT	STRINGENT	YES	YES	YES	YES	3'UTR	NO	3'UTR	3'UTR	Stop codon	3'UTR
AT5G48220	A8MS79, F4K083, Q9LUB2	AT5G48220		Aldolase-type TIM barrel family protein	STRINGENT	STRINGENT	N.A.	YES	NO	NO	NO	3'UTR,3'UTR,3'UTR	3'UTR	NO	3'UTR	Stop codon	3'UTR, CDS
AT5G48230	Q8S4Y1, Q8S4Y1-2	ACAT2	AACT2, ACAT2, EMB1276	acetoacetyl-CoA thiolase 2	STRINGENT	STRINGENT	STRINGENT	YES	YES	YES	YES	3'UTR,3'UTR	NO	3'UTR	3'UTR	3' UTR	3'UTR
AT5G48300	P55228, Q56ZT4, Q56ZU5	ADG1	ADG1, APS1	ADP glucose pyrophosphorylase 1	STRINGENT	STRINGENT	STRINGENT	YES	YES	YES	YES	3'UTR	3'UTR	CDS, 3'UTR	3'UTR	Stop codon	NO
AT5G48335	Q6AWV7	AT5G48335		hypothetical protein	STRINGENT	STRINGENT	STRINGENT	YES	YES	YES	YES	3'UTR	NO	3'UTR	3'UTR	NO	3'UTR
AT5G48580	Q38936	FKBP15-2	FKBP15-2	FK506- and rapamycin-binding protein 15 kD-2	STRINGENT	STRINGENT	STRINGENT	YES	YES	YES	YES	3'UTR	3'UTR	3'UTR	3'UTR	Stop codon	3'UTR
AT5G48760	Q9FKC0	AT5G48760		Ribosomal protein L13 family protein	STRINGENT	STRINGENT	STRINGENT	YES	YES	YES	YES	3'UTR,3'UTR	3'UTR	3'UTR	3'UTR	Stop codon	3'UTR
AT5G48810	Q9ZWT2	CB5-D	ATB5-B, ATCB5-D, B5 #3, CB5-D, CYTB5-B	cytochrome B5 isoform D	STRINGENT	STRINGENT	STRINGENT	YES	YES	YES	YES	3'UTR	5'UTR, CDS	3'UTR	3'UTR	Stop codon	NO
AT5G48870	Q9FKB0	SAD1	AtLSM5, AtSAD1, LSM5, SAD1	Small nuclear ribonucleoprotein family protein	STRINGENT	STRINGENT	STRINGENT	NO	YES	YES	NO	3'UTR	NO	NO	3'UTR	Stop codon	3'UTR
AT5G49510	P57741	PFD3	PFD3	prefoldin 3	STRINGENT	STRINGENT	STRINGENT	YES	YES	YES	YES	3'UTR	NO	3'UTR	3'UTR	coding_intron	3'UTR
AT5G49540	A0A178UH14, Q9AST5	AT5G49540		Rab5-interacting family protein	STRINGENT	STRINGENT	STRINGENT	YES	YES	YES	YES	3'UTR,3'UTR	NO	3'UTR	3'UTR	NO	3'UTR
AT5G49720	Q38890	GH9A1	ATGH9A1, DEC, GH9A1, IRX2, KOR, KOR1, RSW2, TSD1	glycosyl hydrolase 9A1	STRINGENT	STRINGENT	STRINGENT	YES	NO	YES	YES	3'UTR	NO	3'UTR	3'UTR	Stop codon	NO
AT5G49910	Q9LTX9, Q9LTX9-2	cpHsc70-2	cpHsc70-2, HSC70-7	chloroplast heat shock protein 70-2	STRINGENT	STRINGENT	N.A.	YES	NO	NO	NO	3'UTR	3'UTR, CDS	3'UTR	3'UTR	Stop codon	NO
AT5G50460	P0DI74	AT5G50460		secE/sec61-gamma protein transport protein	STRINGENT	STRINGENT	STRINGENT	YES	YES	YES	YES	3'UTR	NO	3'UTR	3'UTR	3' UTR	NO
AT5G50810	A0A178UF55, Q9XGY4	TIM8	TIM8	translocase inner membrane subunit 8	STRINGENT	STRINGENT	STRINGENT	YES	YES	YES	YES	3'UTR	NO	3'UTR, CDS	NO	NO	3'UTR
AT5G50850	Q38799	MAB1	MAB1	Transketolase family protein	STRINGENT	STRINGENT	STRINGENT	YES	YES	YES	YES	3'UTR	NO	3'UTR	3'UTR	Stop codon	3'UTR
AT5G50870	F4KAG5, Q9FI61	UBC27	UBC27	ubiquitin-conjugating enzyme 27	STRINGENT	STRINGENT	STRINGENT	YES	YES	YES	YES	3'UTR,3'UTR	NO	3'UTR	3'UTR	NO	3'UTR
AT5G50920	Q56ZN9, Q9FI56	CLPC1	ATHSP93-V, CLPC, CLPC1, DCA1, HSP93-V	CLPC homologue 1	STRINGENT	STRINGENT	STRINGENT	YES	YES	YES	NO	3'UTR	3'UTR	3'UTR	3'UTR, CDS	Stop codon	NO
AT5G51020	Q9FI46	CRL	CAA33, CRL	crumpled leaf	STRINGENT	STRINGENT	N.A.	YES	NO	NO	NO	3'UTR	NO	3'UTR, CDS	3'UTR, CDS	3' UTR, Stop codon	3'UTR
AT5G51040	A0A1P8BCI7, B9DGI7, F4KBT8, Q9FI44	SDHAF2	SDHAF2	succinate dehydrogenase assembly factor	STRINGENT	STRINGENT	STRINGENT	YES	NO	YES	YES	3'UTR,3'UTR,3'UTR,3'UTR	3'UTR	3'UTR	3'UTR	Stop codon	3'UTR
AT5G51070	P42762	ERD1	CLPD, ERD1, SAG15	Clp ATPase	STRINGENT	STRINGENT	N.A.	YES	NO	NO	NO	3'UTR	NO	3'UTR	3'UTR, CDS	Stop codon	3'UTR
AT5G51110	F4KBV0, Q9LU63	AT5G51110	ATP1, RAF2, SDIRIP1	Transcriptional coactivator/pterin dehydratase	STRINGENT	STRINGENT	STRINGENT	YES	YES	YES	YES	3'UTR,3'UTR	5'UTR	3'UTR	3'UTR, 5'UTR	Stop codon	NO
AT5G51400	P94032, Q9FGN2	AT5G51400		PLAC8 family protein	STRINGENT	STRINGENT	STRINGENT	YES	YES	YES	YES	3'UTR	3'UTR	3'UTR	3'UTR	NO	3'UTR
AT5G51570	Q9FHM7	AT5G51570		SPFH/Band 7/PHB domain-containing membrane-associated protein family	STRINGENT	STRINGENT	STRINGENT	YES	YES	YES	YES	3'UTR	3'UTR	NO	NO	NO	NO
AT5G52040	A0A178UPU3, A0A178UT35, A0A1P8BAJ3, P92966, P92966-2, P92966-3, P92966-4, P92966-5	RS41	At-RS41, ATRSP41, RS41	RNA-binding (RRM/RBD/RNP motifs) family protein	STRINGENT	STRINGENT	STRINGENT	YES	YES	YES	YES	3'UTR,3'UTR,3'UTR,3'UTR,3'UTR,3'UTR,3'UTR	NO	3'UTR	3'UTR	NO	3'UTR
AT5G52240	F4KG44, Q9XFM6	MSBP1	AtMAPR5, ATMP1, MSBP1	membrane steroid binding protein 1	STRINGENT	STRINGENT	STRINGENT	YES	NO	YES	YES	CDS,3'UTR,3'UTR,3'UTR	NO	3'UTR, CDS	3'UTR, CDS	Stop codon	NO
AT5G52440	Q9XH75	HCF106	HCF106	Bacterial sec-independent translocation protein mttA/Hcf106	STRINGENT	STRINGENT	STRINGENT	YES	YES	YES	YES	3'UTR	3'UTR	3'UTR	3'UTR	Stop codon	3'UTR
AT5G52470	Q9FEF8, Q9FEF8-2	FIB1	ATFBR1, ATFIB1, FBR1, FIB1, SKIP7	fibrillarin 1	STRINGENT	STRINGENT	STRINGENT	YES	YES	YES	YES	3'UTR,3'UTR	NO	3'UTR	3'UTR	Stop codon	3'UTR
AT5G52520	Q9FYR6	OVA6	AtProRS-Org, OVA6, ProRS-Org, PRORS1	Class II aaRS and biotin synthetases superfamily protein	STRINGENT	STRINGENT	STRINGENT	YES	NO	YES	NO	3'UTR	NO	3'UTR	3'UTR	3' UTR	3'UTR
AT5G52650	B9DH50, Q9LTF2	AT5G52650		RNA binding Plectin/S10 domain-containing protein	STRINGENT	STRINGENT	STRINGENT	YES	YES	YES	YES	3'UTR	5'UTR	3'UTR	3'UTR	NO	3'UTR
AT5G52840	A0A1P8BD41, Q9FLX7	AT5G52840		NADH-ubiquinone oxidoreductase-like protein	STRINGENT	STRINGENT	STRINGENT	YES	YES	YES	YES	3'UTR	NO	3'UTR	3'UTR	Stop codon	3'UTR
AT5G52920	Q9FLW9	PKP-BETA1	PKP-BETA1, PKP1, PKP2	plastidic pyruvate kinase beta subunit 1	STRINGENT	STRINGENT	STRINGENT	YES	YES	YES	YES	3'UTR	NO	3'UTR	3'UTR	Stop codon	3'UTR
AT5G52960	Q9LVV6	AT5G52960		tRNA dimethylallyltransferase	STRINGENT	STRINGENT	N.A.	YES	NO	NO	NO	3'UTR	NO	CDS, 3'UTR	3'UTR	NO	3'UTR
AT5G53140	Q94AT1	AT5G53140		Protein phosphatase 2C family protein	STRINGENT	STRINGENT	STRINGENT	YES	YES	YES	YES	3'UTR,3'UTR	3'UTR	3'UTR	3'UTR	3' UTR	NO
AT5G53170	Q9FGM0	FTSH11	FTSH11	FTSH protease 11	STRINGENT	N.A.	STRINGENT	NO	NO	YES	NO	3'UTR	NO	3'UTR	NO	NO	NO
AT5G53300	F4KJ37, P35133	UBC10	AtUBC10, UBC10	ubiquitin-conjugating enzyme 10	STRINGENT	STRINGENT	STRINGENT	YES	YES	YES	YES	5'UTR,5'UTR,5'UTR,5'UTR,5'UTR,5'UTR,5'UTR,CDS,CDS,CDS,CDS,3'UTR,3'UTR,3'UTR	NO	3'UTR	3'UTR, CDS, 5'UTR	Stop codon	NO
AT5G53310	A0A1P8BDH1, Q9ASY2, Q9FK11	AT5G53310		myosin heavy chain-like protein	STRINGENT	STRINGENT	STRINGENT	YES	YES	YES	YES	5'UTR,5'UTR,3'UTR	NO	3'UTR	3'UTR	NO	3'UTR
AT5G53350	Q9FK07	CLPX	CLPX	CLP protease regulatory subunit X	STRINGENT	N.A.	STRINGENT	NO	NO	YES	NO	3'UTR	3'UTR	3'UTR	3'UTR	Stop codon	3'UTR
AT5G53460	Q9LV03	GLT1	GLT1	NADH-dependent glutamate synthase 1	STRINGENT	STRINGENT	STRINGENT	YES	NO	YES	YES	3'UTR	3'UTR	3'UTR	3'UTR	NO	NO
AT5G53560	Q42342	CB5-E	ATB5-A, ATCB5-E, B5 #2, CB5-E	cytochrome B5 isoform E	STRINGENT	STRINGENT	STRINGENT	YES	YES	YES	YES	3'UTR	NO	CDS, 3'UTR	3'UTR	Stop codon	NO
AT5G53580	Q56Y42	PLR1	AtPLR1, PLR1	NAD(P)-linked oxidoreductase superfamily protein	STRINGENT	STRINGENT	N.A.	YES	NO	NO	NO	3'UTR	3'UTR	3'UTR	3'UTR	NO	3'UTR
AT5G53650	Q9FJB9	AT5G53650		ABC transporter A family protein	STRINGENT	STRINGENT	STRINGENT	YES	YES	YES	YES	3'UTR	NO	3'UTR	3'UTR	Stop codon	NO
AT5G53860	F4JYQ7, F4JYQ8, F4JYR0, F4JYR1, Q56ZP8, Q93W26	emb2737	ANU7, EMB2737, EMB64	embryo defective 2737	STRINGENT	STRINGENT	STRINGENT	YES	NO	YES	YES	3'UTR,3'UTR,3'UTR,3'UTR,3'UTR	NO	3'UTR	3'UTR	Stop codon	3'UTR
AT5G54160	Q9FK25	OMT1	AtCOMT, ATOMT1, COMT1, OMT1, OMT3	O-methyltransferase 1	STRINGENT	STRINGENT	STRINGENT	YES	NO	YES	NO	3'UTR	NO	3'UTR	3'UTR	Stop codon	NO
AT5G54290	F4K0A8, Q9M5P3	CcdA	CcdA	cytochrome c biogenesis protein family	STRINGENT	STRINGENT	N.A.	YES	NO	NO	NO	3'UTR,3'UTR	StopCodon	3'UTR	3'UTR, CDS	NO	3'UTR
AT5G54310	Q9FL69	AGD5	AGD5, AtAGD5, NEV	ARF-GAP domain 5	STRINGENT	STRINGENT	STRINGENT	YES	YES	YES	YES	3'UTR	NO	3'UTR	3'UTR	NO	3'UTR
AT5G54430	A0A1P8BH73, A0A1P8BH78, Q8VYN9	PHOS32	ATPHOS32, PHOS32	Adenine nucleotide alpha hydrolases-like superfamily protein	STRINGENT	STRINGENT	STRINGENT	YES	YES	YES	YES	3'UTR,3'UTR,3'UTR,3'UTR	NO	3'UTR	3'UTR	3' UTR	3'UTR
AT5G54580	Q9FIU6	AT5G54580	ORRM2	RNA-binding (RRM/RBD/RNP motifs) family protein	STRINGENT	STRINGENT	STRINGENT	YES	YES	YES	YES	3'UTR	NO	3'UTR	3'UTR	NO	3'UTR
AT5G54600	F4K1S8, P92959	RPL24	RPL24, SVR8	Translation protein SH3-like family protein	STRINGENT	STRINGENT	STRINGENT	YES	YES	YES	YES	3'UTR,3'UTR	NO	3'UTR	3'UTR, 5'UTR, CDS	Stop codon	NO
AT5G54680	Q9FH37	3	bHLH105, ILR3	basic helix-loop-helix (bHLH) DNA-binding superfamily protein	STRINGENT	STRINGENT	STRINGENT	YES	NO	YES	YES	3'UTR	NO	3'UTR	3'UTR	NO	NO
AT5G54750	F4K1U5, Q9FFV2	AT5G54750		Transport protein particle (TRAPP) component	STRINGENT	STRINGENT	STRINGENT	YES	NO	YES	YES	3'UTR,3'UTR	NO	3'UTR	3'UTR	NO	NO
AT5G54760	Q9FFV1	AT5G54760		Translation initiation factor SUI1 family protein	STRINGENT	STRINGENT	STRINGENT	YES	YES	YES	YES	3'UTR,3'UTR,3'UTR,3'UTR	NO	3'UTR	3'UTR	NO	NO
AT5G54770	Q38814, Q38814-2	THI1	THI1, THI4, TZ	thiazole biosynthetic enzyme, chloroplast (ARA6) (THI1) (THI4)	STRINGENT	STRINGENT	N.A.	YES	YES	NO	NO	3'UTR	NO	3'UTR	3'UTR, 5'UTR, CDS	NO	NO
AT5G54800	Q9M5A9	GPT1	ATGPT1, GPT1	glucose 6-phosphate/phosphate translocator 1	STRINGENT	N.A.	STRINGENT	NO	NO	YES	NO	3'UTR	3'UTR	NO	3'UTR	3' UTR	3'UTR
AT5G54810	P14671, Q56YC7	TSB1	ATTSB1, TRP2, TRPB, TSB1	tryptophan synthase beta-subunit 1	STRINGENT	STRINGENT	STRINGENT	YES	YES	YES	YES	3'UTR	NO	3'UTR	3'UTR	NO	3'UTR
AT5G54870	A0A178UJ08, A0A1P8BB73, Q9FFU3	AT5G54870		inositol-1,4,5-trisphosphate 5-phosphatase	STRINGENT	STRINGENT	STRINGENT	YES	NO	YES	NO	3'UTR,3'UTR	NO	3'UTR	3'UTR	NO	3'UTR
AT5G54900	Q9FPJ8	RBP45A	ATRBP45A, RBP45A	RNA-binding protein 45A	STRINGENT	STRINGENT	STRINGENT	YES	YES	YES	YES	3'UTR	3'UTR	3'UTR	3'UTR	NO	3'UTR
AT5G55070	Q9FLQ4	AT5G55070		Dihydrolipoamide succinyltransferase	STRINGENT	STRINGENT	STRINGENT	YES	YES	YES	YES	3'UTR	3'UTR	3'UTR	3'UTR	Stop codon	3'UTR
AT5G55160	F4K3D6, Q9FLP6	SUMO2	ATSUMO2, SUM2, SUMO 2, SUMO2	small ubiquitin-like modifier 2	STRINGENT	STRINGENT	STRINGENT	YES	YES	YES	YES	3'UTR,3'UTR	3'UTR	3'UTR	3'UTR	Stop codon	NO
AT5G55190	Q8H156	RAN3	ATRAN3, RAN3	RAN GTPase 3	STRINGENT	STRINGENT	STRINGENT	YES	YES	YES	YES	3'UTR	NO	3'UTR	3'UTR	Stop codon	3'UTR
AT5G55220	Q8S9L5	AT5G55220		trigger factor type chaperone family protein	STRINGENT	STRINGENT	N.A.	YES	YES	NO	NO	3'UTR	3'UTR	3'UTR	3'UTR	Stop codon	NO
AT5G55290	Q9FLN5	AT5G55290		ATPase, V0 complex, subunit E	STRINGENT	STRINGENT	STRINGENT	YES	YES	YES	YES	3'UTR,3'UTR,3'UTR	NO	3'UTR	3'UTR	Stop codon	3'UTR
AT5G55610	F4K4X9, Q9FM77	AT5G55610		isopentenyl-diphosphate delta-isomerase	STRINGENT	STRINGENT	STRINGENT	YES	NO	YES	NO	3'UTR,3'UTR	NO	NO	NO	NO	3'UTR
AT5G55850	F4K692, O22633, O22633-2	NOI	NOI	RPM1-interacting protein 4 (RIN4) family protein	STRINGENT	N.A.	STRINGENT	NO	NO	YES	YES	3'UTR,CDS,CDS,3'UTR,3'UTR,3'UTR	NO	3'UTR	3'UTR, CDS	3' UTR	NO
AT5G56010	P51818	HSP81-3	AtHsp90-3, AtHsp90.3, HSP81-3, Hsp81.3	heat shock protein 81-3	STRINGENT	STRINGENT	STRINGENT	YES	NO	YES	YES	3'UTR	NO	3'UTR	NO	NO	NO
AT5G56030	F4K6B6, P55737	HSP81-2	AtHsp90.2, ERD8, HSP81-2, HSP81.2, HSP90.2	heat shock protein 81-2	STRINGENT	STRINGENT	STRINGENT	YES	YES	YES	YES	3'UTR	NO	3'UTR	3'UTR	NO	NO
AT5G56150	A0A2H1ZE82, Q9FKT3	UBC30	UBC30	ubiquitin-conjugating enzyme 30	STRINGENT	STRINGENT	STRINGENT	YES	YES	YES	YES	3'UTR,3'UTR	NO	3'UTR	3'UTR	Stop codon	3'UTR
AT5G56170	Q9FKT1	LLG1	LLG1	LORELEI-LIKE-GPI-ANCHORED PROTEIN 1	STRINGENT	STRINGENT	STRINGENT	YES	NO	YES	NO	3'UTR	NO	3'UTR	3'UTR	Stop codon	NO
AT5G56350	Q9FM97	AT5G56350		Pyruvate kinase family protein	STRINGENT	STRINGENT	STRINGENT	YES	NO	YES	YES	3'UTR	NO	3'UTR	NO	3' UTR	3'UTR
AT5G56360	Q94AF1, Q9FM96	PSL4	PSL4	calmodulin-binding protein	STRINGENT	STRINGENT	STRINGENT	YES	NO	YES	YES	3'UTR	NO	NO	NO	3' UTR	3'UTR
AT5G56670	P49689	AT5G56670		Ribosomal protein S30 family protein	STRINGENT	STRINGENT	STRINGENT	YES	YES	YES	YES	3'UTR	3'UTR	3'UTR	3'UTR, 5'UTR	Stop codon	3'UTR
AT5G56710	A8MR49, P51420	AT5G56710		Ribosomal protein L31e family protein	STRINGENT	STRINGENT	STRINGENT	YES	YES	YES	YES	CDS,CDS,3'UTR,3'UTR	NO	3'UTR	3'UTR	NO	NO
AT5G57040	Q9LTR8	AT5G57040	GLXI-like;11	Lactoylglutathione lyase / glyoxalase I family protein	STRINGENT	STRINGENT	STRINGENT	YES	YES	YES	NO	CDS,3'UTR	NO	3'UTR	3'UTR, CDS	Stop codon	NO
AT5G57290	B3H4N7, F4KAM0, Q9LVC9	AT5G57290	AtP3B, P3B	60S acidic ribosomal protein family	STRINGENT	STRINGENT	STRINGENT	YES	YES	YES	YES	3'UTR,3'UTR,3'UTR	NO	3'UTR	3'UTR	NO	3'UTR
AT5G57330	Q9LVC5	AT5G57330		Galactose mutarotase-like superfamily protein	STRINGENT	STRINGENT	STRINGENT	YES	NO	YES	YES	3'UTR	NO	3'UTR	3'UTR	3' UTR	3'UTR
AT5G57655	F4KC24, Q9FKK7	AT5G57655		xylose isomerase family protein	STRINGENT	STRINGENT	STRINGENT	YES	NO	YES	YES	3'UTR,3'UTR	NO	3'UTR	3'UTR, 5'UTR	Stop codon	3'UTR
AT5G57815	Q945L0	AT5G57815		Cytochrome c oxidase, subunit Vib family protein	STRINGENT	STRINGENT	STRINGENT	YES	YES	YES	YES	3'UTR	3'UTR	3'UTR	3'UTR	NO	3'UTR
AT5G57870	Q93VJ7, Q93ZT6, Q93ZT6-2	eIFiso4G1	eIFiso4G1	MIF4G domain-containing protein / MA3 domain-containing protein	STRINGENT	STRINGENT	STRINGENT	YES	YES	YES	YES	3'UTR,3'UTR	NO	3'UTR	3'UTR	Stop codon	3'UTR
AT5G58030	Q9FGU1	AT5G58030		Transport protein particle (TRAPP) component	STRINGENT	STRINGENT	STRINGENT	YES	NO	NO	YES	3'UTR	3'UTR	3'UTR	3'UTR	Stop codon	3'UTR
AT5G58060	F4KDI1, Q9ZRD6	YKT61	ATGP1, ATYKT61, YKT61	SNARE-like superfamily protein	STRINGENT	N.A.	STRINGENT	NO	NO	YES	NO	3'UTR,3'UTR	NO	3'UTR	3'UTR	Stop codon	3'UTR
AT5G58100	A0A178URL8, F4KDI6	AT5G58100		transmembrane protein	STRINGENT	STRINGENT	STRINGENT	YES	NO	YES	YES	3'UTR,3'UTR	NO	3'UTR	3'UTR	Stop codon	3'UTR
AT5G58110	Q9FGT3	AT5G58110		chaperone binding / ATPase activator	STRINGENT	STRINGENT	STRINGENT	YES	YES	YES	YES	3'UTR	3'UTR, StopCodon	3'UTR	3'UTR	NO	3'UTR
AT5G58140	A8MS49, F4KDJ3, P93025, P93025-2	PHOT2	AtPHOT2, NPL1, PHOT2	phototropin 2	STRINGENT	STRINGENT	N.A.	YES	NO	NO	NO	3'UTR,3'UTR,3'UTR	NO	CDS, 3'UTR	3'UTR	Stop codon	NO
AT5G58290	Q9SEI4	RPT3	RPT3	regulatory particle triple-A ATPase 3	STRINGENT	STRINGENT	STRINGENT	YES	YES	YES	YES	3'UTR	NO	3'UTR	3'UTR, CDS	Stop codon	NO
AT5G58330	A0A178UKK6, C0Z2A4, Q8H1E2, Q8H1E2-2	AT5G58330	NADP-MDH	lactate/malate dehydrogenase family protein	STRINGENT	STRINGENT	STRINGENT	YES	YES	YES	YES	3'UTR,3'UTR,3'UTR	3'UTR	3'UTR	3'UTR	NO	3'UTR
AT5G58375	Q7XA76	AT5G58375		Methyltransferase-related protein	STRINGENT	STRINGENT	STRINGENT	YES	YES	YES	YES	3'UTR	NO	NO	3'UTR	Stop codon	NO
AT5G58420	Q8VYK6	AT5G58420		Ribosomal protein S4 (RPS4A) family protein	STRINGENT	STRINGENT	STRINGENT	YES	YES	YES	YES	3'UTR	NO	3'UTR	3'UTR	Stop codon	3'UTR
AT5G58710	Q9SP02	ROC7	ROC7	rotamase CYP 7	STRINGENT	STRINGENT	STRINGENT	YES	YES	YES	YES	3'UTR	NO	3'UTR	3'UTR	Stop codon	3'UTR
AT5G58740	Q8VXX3, Q9LUY7	AT5G58740		HSP20-like chaperones superfamily protein	STRINGENT	STRINGENT	STRINGENT	YES	YES	YES	YES	3'UTR	NO	3'UTR	3'UTR	Stop codon	3'UTR
AT5G59140	Q9FIG0	AT5G59140		BTB/POZ domain-containing protein	STRINGENT	STRINGENT	STRINGENT	YES	YES	YES	YES	3'UTR	3'UTR	NO	3'UTR	NO	3'UTR
AT5G59160	P48482	TOPP2	PPO, TOPP2	type one serine/threonine protein phosphatase 2	STRINGENT	STRINGENT	STRINGENT	YES	NO	YES	YES	3'UTR,3'UTR,3'UTR	CDS, 3'UTR	3'UTR	3'UTR	3' UTR	3'UTR
AT5G59420	Q93Y40	ORP3C	ORP3C	OSBP(oxysterol binding protein)-related protein 3C	STRINGENT	STRINGENT	STRINGENT	YES	NO	YES	YES	3'UTR	NO	3'UTR	NO	NO	NO
AT5G59613	A0A384KW84	AT5G59613		ATP synthase	STRINGENT	STRINGENT	STRINGENT	YES	YES	YES	YES	3'UTR,3'UTR	NO	3'UTR	3'UTR, 5'UTR	Stop codon	3'UTR
AT5G59840	Q9FJF1	AT5G59840	AtRabE1b	Ras-related small GTP-binding family protein	STRINGENT	STRINGENT	STRINGENT	YES	YES	YES	YES	3'UTR	3'UTR	3'UTR	3'UTR	NO	3'UTR
AT5G59850	P42798	AT5G59850		Ribosomal protein S8 family protein	STRINGENT	STRINGENT	STRINGENT	NO	YES	YES	YES	3'UTR	NO	3'UTR	3'UTR	NO	NO
AT5G59880	F4JXD5, Q9ZSK4	ADF3	ADF3	actin depolymerizing factor 3	STRINGENT	STRINGENT	STRINGENT	YES	YES	YES	YES	3'UTR,3'UTR	3'UTR	3'UTR	3'UTR	Stop codon	NO
AT5G59890	Q9ZSK3, Q9ZSK3-2	ADF4	ADF4, ATADF4	actin depolymerizing factor 4	STRINGENT	STRINGENT	STRINGENT	YES	YES	YES	YES	3'UTR,3'UTR,3'UTR	NO	3'UTR	3'UTR	Stop codon	NO
AT5G59950	A0A178U8W3, B3H4K4, F4JXE3, F4JXE5, Q8L773	AT5G59950	ALY1	RNA-binding (RRM/RBD/RNP motifs) family protein	STRINGENT	STRINGENT	STRINGENT	NO	YES	YES	YES	3'UTR,3'UTR,3'UTR,3'UTR,3'UTR	StartCodon	3'UTR	3'UTR	Stop codon	3'UTR
AT5G60160	Q9LST0	AT5G60160	DAP1	Zn-dependent exopeptidases superfamily protein	STRINGENT	STRINGENT	STRINGENT	YES	NO	YES	YES	3'UTR	3'UTR	3'UTR	3'UTR	Stop codon	3'UTR
AT5G60360	A8MQZ1, F4JYX9, Q8H166	ALP	AALP, ALP, SAG2	aleurain-like protease	STRINGENT	STRINGENT	STRINGENT	YES	YES	YES	YES	3'UTR,3'UTR,3'UTR	CDS	3'UTR	3'UTR, 5'UTR, CDS	Stop codon	NO
AT5G60390	P0DH99	AT5G60390	EF1alpha	GTP binding Elongation factor Tu family protein	STRINGENT	STRINGENT	STRINGENT	YES	YES	YES	YES	CDS,CDS,CDS,3'UTR,3'UTR,3'UTR	5'UTR, CDS	3'UTR	3'UTR, CDS	Stop codon	NO
AT5G60600	B3H725, F4K0E8, F4K0E8-2	HDS	CLB4, CSB3, GCPE, HDS, ISPG	4-hydroxy-3-methylbut-2-enyl diphosphate synthase	STRINGENT	STRINGENT	N.A.	YES	NO	NO	NO	3'UTR,3'UTR,3'UTR,3'UTR,3'UTR	NO	3'UTR	3'UTR	Stop codon	NO
AT5G60640	F4K0F5, F4K0F7, Q9FF55	PDIL1-4	ATPDI2, ATPDIL1-4, PDI2, PDIL1-4	PDI-like 1-4	STRINGENT	STRINGENT	STRINGENT	YES	NO	YES	YES	3'UTR,3'UTR,3'UTR	3'UTR	3'UTR	3'UTR	Stop codon	NO
AT5G60790	Q9FJH6	ABCF1	ABCF1, ATGCN1, GCN1	ABC transporter family protein	STRINGENT	STRINGENT	STRINGENT	YES	YES	YES	YES	3'UTR	3'UTR	3'UTR	3'UTR	NO	NO
AT5G60920	A0A1P8BCB5, Q94KT8	COB	COB	COBRA-like extracellular glycosyl-phosphatidyl inositol-anchored protein family	STRINGENT	STRINGENT	STRINGENT	YES	NO	YES	YES	CDS,CDS,3'UTR,3'UTR	NO	3'UTR	3'UTR, 5'UTR	Stop codon	3'UTR
AT5G60980	Q9FME2, Q9FME2-2	AT5G60980	NTF2	Nuclear transport factor 2 (NTF2) family protein with RNA binding (RRM-RBD-RNP motifs) domain-containing protein	STRINGENT	N.A.	STRINGENT	NO	NO	YES	YES	3'UTR,3'UTR,3'UTR,3'UTR	NO	3'UTR	3'UTR	NO	NO
AT5G61130	A0A178UP42, Q9FNQ2	PDCB1	AtPDCB1, PDCB1	plasmodesmata callose-binding protein 1	STRINGENT	STRINGENT	STRINGENT	YES	YES	YES	YES	3'UTR	5'UTR	3'UTR	3'UTR	NO	NO
AT5G61170	Q9FNP8	AT5G61170		Ribosomal protein S19e family protein	STRINGENT	STRINGENT	STRINGENT	YES	YES	YES	YES	3'UTR	NO	3'UTR	3'UTR	Stop codon	3'UTR
AT5G61410	Q9SAU2	RPE	EMB2728, RPE	D-ribulose-5-phosphate-3-epimerase	STRINGENT	STRINGENT	STRINGENT	YES	YES	YES	YES	3'UTR,3'UTR	5'UTR, StartCodon	3'UTR	3'UTR, CDS	3' UTR	3'UTR
AT5G61670	Q9FKF4	AT5G61670	AtOR	orange protein	STRINGENT	STRINGENT	N.A.	YES	NO	NO	NO	3'UTR,3'UTR,3'UTR	NO	3'UTR	3'UTR	Stop codon	3'UTR
AT5G61790	P29402	1	ATCNX1, CNX1	calnexin 1	STRINGENT	STRINGENT	STRINGENT	YES	NO	YES	NO	3'UTR	NO	3'UTR	3'UTR, 5'UTR	3' UTR	NO
AT5G61970	Q9FH46	AT5G61970		signal recognition particle-related / SRP-like protein	STRINGENT	STRINGENT	STRINGENT	YES	YES	YES	YES	3'UTR	3'UTR	3'UTR	3'UTR	Stop codon	3'UTR
AT5G62190	Q39189	PRH75	AtRH7, PRH75	DEAD box RNA helicase (PRH75)	STRINGENT	STRINGENT	STRINGENT	YES	YES	YES	YES	3'UTR	NO	3'UTR	3'UTR	Stop codon	3'UTR
AT5G62300	P49200, Q8H189	AT5G62300		Ribosomal protein S10p/S20e family protein	STRINGENT	STRINGENT	STRINGENT	YES	YES	YES	YES	3'UTR,3'UTR	NO	3'UTR	3'UTR	Stop codon	3'UTR
AT5G62575	A0A178UED7, Q3E870, Q3E870-2	SDH7	SDH7, SDH7B	succinate dehydrogenase subunit	STRINGENT	STRINGENT	STRINGENT	YES	NO	YES	YES	3'UTR,3'UTR	NO	NO	NO	NO	3'UTR
AT5G62690	Q9ASR0	TUB2	TUB2	tubulin beta chain 2	STRINGENT	STRINGENT	STRINGENT	YES	YES	YES	YES	3'UTR	NO	3'UTR	3'UTR, CDS	Stop codon	NO
AT5G62700	Q9ASR0	TUB3	TUB3	tubulin beta chain 3	STRINGENT	STRINGENT	STRINGENT	YES	YES	YES	YES	3'UTR	NO	3'UTR	3'UTR	Stop codon	3'UTR
AT5G62790	F4K7T6, Q9XFS9	DXR	DXR, PDE129	1-deoxy-D-xylulose 5-phosphate reductoisomerase	STRINGENT	STRINGENT	N.A.	YES	NO	NO	NO	3'UTR,3'UTR	NO	3'UTR	3'UTR	Stop codon	NO
AT5G62810	Q9FXT6	PEX14	AtPED2, ATPEX14, PED2, PEX14	peroxin 14	STRINGENT	STRINGENT	STRINGENT	YES	NO	YES	NO	3'UTR	NO	CDS, 3'UTR	3'UTR	Stop codon	3'UTR
AT5G62890	B9DF96, Q27GI3, Q27GI3-2	AT5G62890		Xanthine/uracil permease family protein	STRINGENT	STRINGENT	STRINGENT	YES	NO	YES	YES	3'UTR,3'UTR,3'UTR	NO	NO	3'UTR	Stop codon	3'UTR
AT5G63030	Q8L8T2	GRXC1	GRXC1	Thioredoxin superfamily protein	STRINGENT	N.A.	STRINGENT	NO	NO	YES	YES	3'UTR	NO	3'UTR	3'UTR	Stop codon	3'UTR
AT5G63310	O64903	NDPK2	ATNDPK2, NDPK IA, NDPK IA IA, NDPK1A, NDPK2	nucleoside diphosphate kinase 2	STRINGENT	STRINGENT	STRINGENT	YES	YES	YES	YES	3'UTR	NO	3'UTR	3'UTR	Stop codon	3'UTR
AT5G63400	F4KAP2, O82514	ADK1	ADK1	adenylate kinase 1	STRINGENT	STRINGENT	STRINGENT	YES	YES	YES	YES	3'UTR,3'UTR	NO	3'UTR	3'UTR	Stop codon	3'UTR
AT5G63510	F4KAQ8, Q9FMV1	GAMMA CAL1	GAMMA CAL1	gamma carbonic anhydrase like 1	STRINGENT	STRINGENT	STRINGENT	YES	YES	YES	YES	3'UTR,3'UTR	NO	3'UTR	3'UTR	Stop codon	3'UTR
AT5G63670	F4KAT2, Q94C60	SPT42	SPT4-2, SPT42	SPT4 homolog 2	STRINGENT	STRINGENT	STRINGENT	YES	YES	YES	YES	3'UTR,3'UTR,3'UTR	NO	3'UTR	3'UTR	3' UTR	3'UTR
AT5G63860	Q9FN03	UVR8	AtUVR8, UVR8	Regulator of chromosome condensation (RCC1) family protein	STRINGENT	STRINGENT	STRINGENT	YES	YES	YES	YES	3'UTR	NO	3'UTR	3'UTR	3' UTR	3'UTR
AT5G64130	A8MS32, F4KC91, Q93Z49, Q9FMI6	AT5G64130		cAMP-regulated phosphoprotein 19-related protein	STRINGENT	STRINGENT	STRINGENT	YES	YES	YES	YES	5'UTR,5'UTR,5'UTR,3'UTR,3'UTR,3'UTR	NO	3'UTR	3'UTR, 5'UTR	Stop codon	3'UTR
AT5G64140	P34789	RPS28	RPS28	ribosomal protein S28	STRINGENT	STRINGENT	STRINGENT	YES	YES	YES	YES	3'UTR	NO	3'UTR	3'UTR	NO	3'UTR
AT5G64170	A8MQN2, A8MQN2-2	AT5G64170	LNK1	dentin sialophosphoprotein-like protein	STRINGENT	STRINGENT	STRINGENT	YES	YES	YES	NO	3'UTR,3'UTR,3'UTR,3'UTR,3'UTR	3'UTR	3'UTR	3'UTR	NO	3'UTR
AT5G64350	Q8LGG0	FKBP12	ATFKBP12, FKBP12, FKP12	FK506-binding protein 12	STRINGENT	STRINGENT	STRINGENT	YES	YES	YES	YES	CDS,3'UTR	NO	3'UTR	3'UTR, 5'UTR	Stop codon	NO
AT5G64400	A0A1P8BDN9, F4KDN4, Q9FME9	AT5G64400	At12Cys-1	CHCH domain protein	STRINGENT	STRINGENT	STRINGENT	YES	YES	YES	YES	3'UTR,3'UTR,3'UTR	NO	3'UTR	3'UTR, 5'UTR	Stop codon	NO
AT5G64460	A8MSE9, F4KDP8, Q9FGF0	AT5G64460		Phosphoglycerate mutase family protein	STRINGENT	STRINGENT	STRINGENT	YES	YES	YES	NO	3'UTR,3'UTR,3'UTR,3'UTR,3'UTR,3'UTR,3'UTR,3'UTR,3'UTR,3'UTR,3'UTR	NO	3'UTR	3'UTR	Stop codon	3'UTR
AT5G64740	Q94JQ6	CESA6	CESA6, E112, IXR2, PRC1	cellulose synthase 6	STRINGENT	STRINGENT	STRINGENT	YES	NO	YES	NO	3'UTR	NO	3'UTR	3'UTR	Stop codon	NO
AT5G64940	Q93Y08	ATH13	abc1k8, ATATH13, ATH13, ATOSA1, OSA1	ABC2 homolog 13	STRINGENT	STRINGENT	STRINGENT	YES	YES	YES	NO	3'UTR,3'UTR	CDS	3'UTR	3'UTR	CDS, 3' UTR	3'UTR
AT5G64960	A0A178UIR6, F4KGG0, Q56W49, Q8W4P1	CDKC2	CDKC2, CDKC;2	cyclin dependent kinase group C2	STRINGENT	STRINGENT	STRINGENT	YES	YES	YES	YES	3'UTR,3'UTR	NO	3'UTR	3'UTR	Stop codon	3'UTR
AT5G65010	Q9LV77, Q9LV77-2	ASN2	ASN2	asparagine synthetase 2	STRINGENT	STRINGENT	STRINGENT	YES	YES	YES	YES	3'UTR,3'UTR	NO	3'UTR	3'UTR, 5'UTR	NO	NO
AT5G65220	Q9FJP3	AT5G65220	PRPL29	Ribosomal L29 family protein	STRINGENT	STRINGENT	STRINGENT	YES	YES	YES	YES	3'UTR	3'UTR	3'UTR	3'UTR, 5'UTR, CDS	Stop codon	NO
AT5G65260	Q9FJN9	AT5G65260		RNA-binding (RRM/RBD/RNP motifs) family protein	STRINGENT	STRINGENT	STRINGENT	YES	YES	YES	YES	3'UTR	NO	3'UTR	3'UTR	Stop codon	3'UTR
AT5G65430	F4KHY7, P48348, P48348-2	GRF8	14-3-3KAPPA, AtMIN10, GF14 KAPPA, GRF8	general regulatory factor 8	STRINGENT	STRINGENT	STRINGENT	YES	YES	YES	YES	3'UTR,3'UTR,3'UTR	CDS	3'UTR	3'UTR	Stop codon	NO
AT5G65620	A0A178UB21, A0A1R7T3A4, Q94AM1	AT5G65620	OOP, TOP1	Zincin-like metalloproteases family protein	STRINGENT	STRINGENT	STRINGENT	YES	YES	YES	YES	3'UTR	NO	3'UTR	3'UTR	CDS, Stop codon	NO
AT5G65670	F4JXI3, Q38827	IAA9	IAA9	indole-3-acetic acid inducible 9	STRINGENT	STRINGENT	STRINGENT	YES	NO	YES	YES	3'UTR,3'UTR	3'UTR	3'UTR	3'UTR	NO	3'UTR
AT5G65810	Q0WPN7	CGR3	CGR3	transmembrane protein	STRINGENT	STRINGENT	STRINGENT	YES	NO	YES	NO	3'UTR	3'UTR	NO	NO	NO	3'UTR
AT5G66120	Q8VYV7, Q8VYV7-2	AT5G66120		3-dehydroquinate synthase	STRINGENT	STRINGENT	STRINGENT	YES	YES	YES	NO	3'UTR,3'UTR	NO	3'UTR	3'UTR	Stop codon	3'UTR
AT5G66140	O24616	PAD2	PAD2	proteasome alpha subunit D2	STRINGENT	STRINGENT	STRINGENT	YES	YES	YES	YES	3'UTR	NO	3'UTR	3'UTR	Stop codon	3'UTR
AT5G66190	F4JZ46, Q9FKW6	FNR1	ATLFNR1, FNR1, LFNR1	ferredoxin-NADP[ ]-oxidoreductase 1	STRINGENT	STRINGENT	STRINGENT	YES	YES	YES	NO	3'UTR,3'UTR	NO	3'UTR	3'UTR, 5'UTR, CDS	Stop codon	NO
AT5G66510	Q94AU7, Q94AU7-2	GAMMA CA3	GAMMA CA3	gamma carbonic anhydrase 3	STRINGENT	STRINGENT	STRINGENT	YES	YES	YES	YES	3'UTR,3'UTR	NO	3'UTR	3'UTR	Stop codon	3'UTR
AT5G66570	P23321	PSBO1	MSP-1, OE33, OEE1, OEE33, PSBO-1, PSBO1	PS II oxygen-evolving complex 1	STRINGENT	STRINGENT	N.A.	YES	YES	NO	NO	3'UTR	NO	3'UTR	3'UTR, 5'UTR, CDS	NO	NO
AT5G66680	Q944K2	DGL1	DGL1	dolichyl-diphosphooligosaccharide-protein glycosyltransferase 48kDa subunit family protein	STRINGENT	STRINGENT	STRINGENT	YES	YES	YES	YES	3'UTR	3'UTR	3'UTR	3'UTR	Stop codon	3'UTR
AT5G66760	O82663	SDH1-1	SDH1-1	succinate dehydrogenase 1-1	STRINGENT	STRINGENT	STRINGENT	YES	YES	YES	YES	3'UTR	NO	NO	3'UTR	Stop codon	NO
AT5G66860	A0A178ULV1	AT5G66860		Ribosomal protein L25/Gln-tRNA synthetase, anti-codon-binding domain-containing protein	STRINGENT	STRINGENT	STRINGENT	YES	YES	YES	YES	3'UTR	NO	3'UTR	3'UTR	Stop codon	3'UTR
AT5G67030	Q9FGC7, Q9FGC7-2	ABA1	ABA1, ATABA1, ATZEP, IBS3, LOS6, NPQ2, ZEP	zeaxanthin epoxidase (ZEP) (ABA1)	STRINGENT	STRINGENT	N.A.	YES	NO	NO	NO	3'UTR,3'UTR	3'UTR	3'UTR, CDS	3'UTR, CDS	Stop codon	3'UTR
AT5G67220	Q9FH91	AT5G67220		FMN-linked oxidoreductases superfamily protein	STRINGENT	STRINGENT	STRINGENT	YES	YES	YES	YES	3'UTR	NO	3'UTR	3'UTR	NO	3'UTR
AT5G67500	A0A2H1ZE94, F4K3R8, Q9FJX3	VDAC2	ATVDAC2, VDAC2	voltage dependent anion channel 2	STRINGENT	STRINGENT	STRINGENT	YES	YES	YES	YES	3'UTR,3'UTR	NO	CDS, 3'UTR	3'UTR	Stop codon	NO
AT5G67590	Q9FJW4	FRO1	FRO1, NDUFS4	NADH-ubiquinone oxidoreductase-like protein	STRINGENT	STRINGENT	STRINGENT	YES	YES	YES	YES	3'UTR	3'UTR	3'UTR	3'UTR	NO	3'UTR
AT1G01020	A0A178WKY9, A0A1P8ARY9, A0A1P8AS22, F4HQG4, Q5MK24, Q5MK24-2	ARV1	ARV1	ARV1 family protein	PERMISSIVE	Non-Target	PERMISSIVE	NO	NO	YES	NO	NO	NO	NO	CDS, 3'UTR	NO	3'UTR
AT1G01080	A0A1P8APK3, F4HQH8, Q8W592	AT1G01080		RNA-binding (RRM/RBD/RNP motifs) family protein	PERMISSIVE	PERMISSIVE	Non-Target	YES	YES	NO	NO	NO	NO	3'UTR	3'UTR	NO	3'UTR
AT1G01210	Q9LNK0	AT1G01210		DNA-directed RNA polymerase, subunit M, archaeal	PERMISSIVE	Non-Target	PERMISSIVE	NO	NO	YES	NO	NO	NO	NO	NO	NO	3'UTR
AT1G01320	A0A1P8AR50, F4HS98, F4HS99	AT1G01320	REC1	Tetratricopeptide repeat (TPR)-like superfamily protein	PERMISSIVE	PERMISSIVE	Non-Target	YES	NO	NO	NO	NO	3'UTR	3'UTR	3'UTR	3' UTR	3'UTR
AT1G01370	A0A178W8H5, A0A178W975, Q8RVQ9	HTR12	CENH3, HTR12	Histone superfamily protein	PERMISSIVE	PERMISSIVE	PERMISSIVE	YES	NO	YES	YES	NO	3'UTR	NO	NO	NO	NO
AT1G01440	Q6NQ63	AT1G01440		hypothetical protein (DUF3133)	PERMISSIVE	PERMISSIVE	PERMISSIVE	YES	NO	YES	NO	NO	NO	NO	NO	NO	NO
AT1G01510	O23702	AN	AN, DOQ	NAD(P)-binding Rossmann-fold superfamily protein	PERMISSIVE	PERMISSIVE	PERMISSIVE	YES	YES	YES	YES	NO	3'UTR	3'UTR	NO	Stop codon	NO
[truncated: 25,671 more rows]
