# Supplementary material for: The YTHDF proteins ECT2 and ECT3 bind largely overlapping target sets and influence target mRNA abundance, not alternative polyadenylation
Source: eLife journal article supplement (doi:10.7554/elife.72377), 2021-09-30
Supplement: supp [file elife-72377-supp-v1.zip › elife_poa_e72377_Supplementary_file_4.xlsx]

## Sheet: Info
Supplementary File 4
Poly(A) site selection
This supplementary table contains information on poly(A)-containing reads from Smart-seq2 libraries of ECT2-mCherry expressing cells (FACS-sorted protoplasts from roots) Protoplast-suspensions were prepared from roots of 5-day-old seedlings of the following genotypes: - ect2-1 ECT2-mCherry (seedlings of 3 independent lines used as biological replicates) - te234 ECT2W464A-mCherry (seedlings of 3 i…
"All genes with PACs" contains all genes with identified poly(A) clusters (PACs) combining all samples, that is ect2-1 ECT2-mCherry (3 replicates) and te234 ECT2W464A-mCherry (3 replicates)
Gene ID(s)	AGI(s) (annotated according to Araport11)
Gene name(s)	Gene name (according to Araport11)
ECT2/3 target status	ECT2/ECT3 target status in roots as defined in Supplemental Fig. 17F and Supplemental Dataset 5. "Permissive" refers to targets in the permissive but not in the stringent set, while "Stringent" refers to targets present in both sets.. "NA" (non-applicable) refers to genes not belonging to any of the three target groups, but that still possess at least one identified poly(A) cluster. Of note, thes…
Chromosome	Chromosome
Strand	DNA strand in which the gene(s) is encoded
Number of PACs	Number of poly(A) clusters associated to that gene(s) (combining all samples)
PAC range(s)	Chromosomal coordinate-ranges of all the poly(A) clusters associated to that gene(s), separated by commas
PAC consensus site(s)	Chromosomal coordinate of the consensus/most-used poly(A) site in each Poly(A) cluster (considering all samples), in the same order as the PAC range(s) column and separated by commas
Poly(A) peak differs	Yes/No indicates whteher the dominant poly(A) site is different (= not exactly the same) between ect2-1 ECT2-mCherry and te234 ECT2W464A-mCherry samples
Dominant poly(A) peak in ect2-1 ECT2-mCherry	Poly(A) site with more reads in ect2-1 ECT2-mCherry samples
Dominant poly(A) peak in te234 ECT2W464A-mCherry	Poly(A) site with more reads in te234 ECT2W464A-mCherry samples
"Genes>1 PAC" provides additional information on dominant poly(A) clusters and most common Poly(A) sites between genotypes
Gene ID	AGI (annotated according to Araport11)
Gene name	Gene name (according to Araport11)
ECT2/3 target status	ECT2/ECT3 target status in roots as defined in Supplemental Fig. 17F and Supplemental Dataset 5 as indicated above.
Chromosome	Chromosome
Strand	DNA strand in which the gene(s) is encoded
Dominant PAC differs	Yes/No indicates whteher the dominant poly(A) cluster (the one with more reads) is different between ect2-1 ECT2-mCherry and te234 ECT2W464A-mCherry samples
Dominant PAC in ect2-1 ECT2-mCherry	Poly(A) cluster with more reads in ect2-1 ECT2-mCherry samples
Dominant PAC in te234 ECT2W464A-mCherry	Poly(A) cluster with more reads in te234 ECT2W464A-mCherry samples
Poly(A) peak differs	Yes/No indicates whteher the dominant poly(A) site is different (= not identical) between ect2-1 ECT2-mCherry and te234 ECT2W464A-mCherry samples
Dominant poly(A) peak in ect2-1 ECT2-mCherry	Poly(A) site with more reads in ect2-1 ECT2-mCherry samples
Dominant poly(A) peak in te234 ECT2W464A-mCherry	Poly(A) site with more reads in te234 ECT2W464A-mCherry samples

## Sheet: All genes with PACs
Gene ID(s)	Gene name(s)	ECT2/3 target status	Chromosome	Strand	Number of PACs	PAC range(s)	PAC consensus site(s)	Poly(A) peak differs	Dominant poly(A) peak in ect2-1 ECT2-mCherry	Dominant poly(A) peak in te234 ECT2W464A-mCherry
AT1G01010	ANAC001|NAC001	non-targets	chr1	+	1	5803-5966	5975	No	5895	5895
AT1G01020	ARV1	permissive	chr1	-	2	6789-6925, 7108-7110	6905, 7108	No	6811	6811
AT1G01050	AtPPa1|PPa1	stringent	chr1	-	1	31060-31255	31293	No	31206	31206
AT1G01060	LHY|LHY1	stringent	chr1	-	1	33741-33786	33785	NA	NA	33741
AT1G01070	UMAMIT28	non-targets	chr1	-	1	38727-38809	38820	Yes	38808	38791
AT1G01090	PDH-E1 ALPHA	stringent	chr1	-	1	47422-47559	47488	Yes	47486	47484
AT1G01100		stringent	chr1	-	1	49963-50178	50186	Yes	50116	50114
AT1G01110	IQD18	non-targets	chr1	+	1	54539-54749	54746	Yes	54703	54684
AT1G01120	KCS1	non-targets	chr1	-	1	57235-57345	57341	Yes	57283	57284
AT1G01130		non-targets	chr1	-	1	63173-63223	63222	NA	63173	NA
AT1G01140	CIPK9|PKS6|SnRK3.12	non-targets	chr1	-	4	64015-64198, 64297-64328, 64898-64906, 67321-67323	64274, 64298, 64906, 67321	Yes	64298	64166
AT1G01160	GIF2	non-targets	chr1	+	1	74029-74105	74059	Yes	74045	74043
AT1G01180		non-targets	chr1	+	1	76643-76736	76735	Yes	76647	76735
AT1G01200	ATRAB-A3|ATRABA3|RABA3	non-targets	chr1	-	1	86483-86587	86586	NA	86483	NA
AT1G01210		permissive	chr1	+	2	89613-89762, 90592-90611	89822, 90593	Yes	89761	89743
AT1G01220	AtFKGP|FKGP	non-targets	chr1	+	1	95650-95661	95660	No	95660	95660
AT1G01225		non-targets	chr1	+	1	97396-97414	97413	NA	97413	NA
AT1G01230		non-targets	chr1	+	1	99193-99241	99276	No	99238	99238
AT1G01240		non-targets	chr1	+	1	101746-101947	101860	Yes	101817	101839
AT1G01260	JAM2	non-targets	chr1	+	2	109314-109349, 111537-111602	109348, 111663	Yes	111599	111601
AT1G01290	CNX3	non-targets	chr1	+	1	116105-116355	116354	NA	116354	NA
AT1G01300		non-targets	chr1	+	1	118570-118771	118774	Yes	118604	118756
AT1G01340	ACBK1|ATCNGC10|CNGC10	non-targets	chr1	-	1	132304-132326	132320	NA	NA	132320
AT1G01350		non-targets	chr1	+	1	138079-138236	138191	No	138136	138136
AT1G01360	PYL9|RCAR1	non-targets	chr1	+	1	143115-143295	143237	No	143176	143176
AT1G01370	CENH3|HTR12	permissive	chr1	+	1	145606-145653	145652	NA	145652	NA
AT1G01380	ETC1	non-targets	chr1	+	1	147905-147937	147936	NA	NA	147936
AT1G01430	TBL25	non-targets	chr1	-	1	156728-156865	156760	Yes	156728	156805
AT1G01440		permissive	chr1	-	1	159631-159752	159724	Yes	159641	159631
AT1G01448		NA	chr1	+	1	166242-166312	166311	NA	NA	NA
AT1G01470	LEA14|LSR3	non-targets	chr1	-	1	171960-172246	172398	No	172189	172189
AT1G01480	ACS2|AT-ACC2	non-targets	chr1	+	1	178277-178449	178448	NA	NA	178448
AT1G01490		non-targets	chr1	-	1	180055-180246	180223	Yes	180161	180119
AT1G01500		non-targets	chr1	+	1	186859-186949	186947	Yes	186945	186947
AT1G01510	AN|DOQ	permissive	chr1	+	2	188930-188931, 190014-190176	188930, 190171	Yes	190156	190033
AT1G01540		stringent	chr1	+	1	198531-198731	198770	Yes	198683	198714
AT1G01550	BPS1	NA	chr1	+	1	201670-201757	201801	NA	NA	NA
AT1G01610	ATGPAT4|GPAT4	NA	chr1	-	1	221763-221765	221764	NA	NA	NA
AT1G01620	PIP1;3|PIP1C|TMP-B	NA	chr1	-	1	225687-225906	226041	NA	NA	NA
AT1G01630		stringent	chr1	+	1	230765-230914	230908	Yes	230834	230840
AT1G01640		non-targets	chr1	-	1	230970-231030	231072	No	230970	230970
AT1G01650	ATSPPL4|SPPL4	permissive	chr1	-	1	232823-233033	233205	Yes	232925	233014
AT1G01660		NA	chr1	-	1	239936-239978	239977	NA	NA	NA
AT1G01710		non-targets	chr1	+	1	266172-266260	266248	Yes	266214	266233
AT1G01715		non-targets	chr1	+	1	267691-267869	267869	Yes	267771	267868
AT1G01720	ANAC002|ATAF1	non-targets	chr1	+	1	269742-269938	269891	No	269818	269818
AT1G01730		non-targets	chr1	+	1	271965-272089	272055	Yes	272002	272020
AT1G01750	ADF11	non-targets	chr1	+	1	276221-276362	276335	Yes	276259	276309
AT1G01780	PLIM2b	non-targets	chr1	+	1	284175-284308	284267	Yes	284265	284196
AT1G01790	ATKEA1|KEA1	non-targets	chr1	+	1	291032-291185	291184	Yes	291184	291049
AT1G01800		stringent	chr1	+	1	294963-295085	295065	No	295014	295014
AT1G01810		non-targets	chr1	+	1	295868-295870	295869	Yes	295868	295869
AT1G01820	PEX11C	stringent	chr1	-	1	295985-296065	296013	No	296002	296002
AT1G01830		non-targets	chr1	-	1	298530-298630	298681	Yes	298601	298624
AT1G01840		non-targets	chr1	+	1	304178-304197	304196	No	304196	304196
AT1G01860	PFC1	non-targets	chr1	-	1	304112-304149	304164	Yes	304129	304112
AT1G01900	ATSBT1.1|SBTI1.1	non-targets	chr1	+	1	313070-313146	313129	No	313129	313129
AT1G01910		stringent	chr1	-	1	313219-313328	313295	Yes	313259	313264
AT1G01920		permissive	chr1	+	1	319584-319682	319721	Yes	319655	319656
AT1G01930		non-targets	chr1	-	1	319834-319901	319947	Yes	319834	319838
AT1G01940		permissive	chr1	+	1	324825-324930	325003	No	324914	324914
AT1G01950	ARK2|AtKINUb	permissive	chr1	+	1	330458-330523	330522	Yes	330507	330510
AT1G01960	EDA10	permissive	chr1	-	1	330540-330658	330586	No	330586	330586
AT1G01990		non-targets	chr1	-	2	342823-342956, 343225-343267	342955, 343266	Yes	343234	343266
AT1G02000	GAE2	non-targets	chr1	+	1	347474-347608	347608	Yes	347524	347591
AT1G02090	ATCSN7|COP15|CSN7|FUS5	permissive	chr1	-	2	387246-387366, 387872-388038	387397, 388083	No	387327	387327
AT1G02100	SBI1	permissive	chr1	+	1	392742-392874	392956	Yes	392826	392873
AT1G02120	VAD1	stringent	chr1	+	1	399858-399944	399965	Yes	399940	399918
AT1G02130	ARA-5|ARA5|ATRAB1B|ATRABD2A|RA-5|RABD2A	permissive	chr1	-	1	399985-400129	400100	Yes	400043	400042
AT1G02140	HAP1|MAGO|MEE63	stringent	chr1	-	1	403120-403300	403331	Yes	403211	403242
AT1G02145	ALG12|EBS4	non-targets	chr1	+	1	408608-408691	408737	Yes	408690	408657
AT1G02150		non-targets	chr1	+	1	410569-410659	410578	Yes	410578	410569
AT1G02160		non-targets	chr1	+	1	411505-411637	411600	Yes	411585	411525
AT1G02170	ATMC1|AtMCP1b|ATMCPB1|LOL3|MC1|MCP1b	permissive	chr1	+	1	413501-413616	413596	Yes	413551	413553
AT1G02205	CER1|CER22	non-targets	chr1	+	1	422360-422416	422463	Yes	422412	422415
AT1G02220	ANAC003|NAC003	non-targets	chr1	-	1	428682-428775	428769	Yes	428763	428714
AT1G02230	ANAC004|NAC004	non-targets	chr1	-	1	434892-435047	435120	Yes	435026	435028
AT1G02260		non-targets	chr1	-	1	440458-440654	440653	Yes	440458	440604
AT1G02270		non-targets	chr1	-	1	443138-443248	443202	Yes	443176	443174
AT1G02280	ATTOC33|PPI1|TOC33	stringent	chr1	-	1	448468-448521	448521	Yes	448472	448468
AT1G02305		stringent	chr1	+	1	458033-458209	458066	No	458055	458055
AT1G02330		non-targets	chr1	-	1	461986-462105	462114	Yes	462078	462082
AT1G02335	GL22|PDGLP2	non-targets	chr1	-	1	463838-463988	463975	Yes	463857	463900
AT1G02340	FBI1|HFR1|REP1|RSF1	non-targets	chr1	-	2	465628-465783, 467218-467219	465769, 467218	Yes	465769	465723
AT1G02360		non-targets	chr1	-	1	471956-472021	471991	No	471989	471989
AT1G02380		non-targets	chr1	+	1	478970-478973	478970	No	478970	478970
AT1G02390	ATGPAT2|GPAT2	non-targets	chr1	+	1	483320-483350	483349	NA	NA	483349
AT1G02400	ATGA2OX4|ATGA2OX6|DTA1|GA2OX6	non-targets	chr1	+	2	487415-487515, 489487-489651	487543, 489545	No	489539	489539
AT1G02410		permissive	chr1	+	1	492845-492988	492998	No	492925	492925
AT1G02430	ARFD1B|ATARFD1B	non-targets	chr1	-	1	495022-495137	495146	Yes	495080	495050
AT1G02440	ARFD1A|ATARFD1A	non-targets	chr1	-	1	496433-496514	496513	NA	496433	NA
AT1G02460		non-targets	chr1	-	1	504458-504679	504646	Yes	504458	504466
AT1G02500	AtSAM1|MAT1|METK1|SAM-1|SAM1	stringent	chr1	+	1	520302-520520	520389	No	520349	520349
AT1G02520	ABCB11|MDR8|PGP11	non-targets	chr1	+	1	528867-529054	528943	Yes	528896	528919
AT1G02560	CLPP5|NCLPP1|NCLPP5	stringent	chr1	+	1	539952-540132	539989	Yes	539987	539967
AT1G02570		non-targets	chr1	+	1	542236-542273	542236	No	542236	542236
AT1G02575		non-targets	chr1	+	1	544003-544037	544005	Yes	544025	544003
AT1G02610		non-targets	chr1	-	1	553016-553113	553132	Yes	553066	553058
AT1G02640	ATBXL2|BXL2	non-targets	chr1	+	1	567643-567833	567885	Yes	567767	567766
AT1G02660		non-targets	chr1	-	1	571965-572030	572043	Yes	571967	571965
AT1G02680	TAF13	non-targets	chr1	+	1	582043-582358	582459	Yes	582357	582286
AT1G02690	IMPA-6	permissive	chr1	+	1	587218-587219	587218	NA	NA	587218
AT1G02700		NA	chr1	+	1	589287-589381	589380	NA	NA	NA
AT1G02705		non-targets	chr1	+	1	590126-590251	590129	Yes	590126	590129
AT1G02720	GATL5	non-targets	chr1	+	2	593257-593316, 594199-594266	593315, 594279	Yes	594224	594265
AT1G02750		non-targets	chr1	+	1	604225-604366	604345	No	604285	604285
AT1G02780	emb2386	stringent	chr1	-	1	607806-607984	608004	Yes	607909	607912
AT1G02810		non-targets	chr1	+	1	620429-620509	620508	Yes	620508	620481
AT1G02816		non-targets	chr1	+	2	622265-622475, 622833-622888	622344, 622887	Yes	622308	622301
AT1G02840	At-SR34|ATSRP34|SR1|SR34|SRP34	permissive	chr1	+	1	629731-629813	629845	No	629809	629809
AT1G02850	BGLU11	non-targets	chr1	+	1	633181-633298	633297	Yes	633183	633297
AT1G02860	BAH1|NLA	non-targets	chr1	+	1	637169-637262	637305	No	637259	637259
AT1G02870		non-targets	chr1	-	1	637252-637323	637297	Yes	637292	637296
AT1G02880	TPK1	permissive	chr1	-	1	642782-642941	643008	No	642895	642895
AT1G02890		non-targets	chr1	-	2	645069-645215, 645771-645776	645114, 645775	Yes	645101	645099
AT1G02900	ATRALF1|RALF1|RALFL1	non-targets	chr1	-	1	653704-653828	653796	Yes	653746	653771
AT1G02910	LPA1	non-targets	chr1	-	1	655510-655625	655570	Yes	655570	655569
AT1G02930	ATGST1|ATGSTF3|ATGSTF6|ERD11|GST1|GSTF6	non-targets	chr1	-	1	661169-661210	661190	No	661183	661183
AT1G02960		non-targets	chr1	-	1	666869-666978	666877	No	666870	666870
AT1G02980	ATCUL2|CUL2	NA	chr1	+	1	681303-681463	681324	NA	NA	NA
AT1G02990		non-targets	chr1	-	1	681368-681500	681499	NA	681368	NA
AT1G03000	PEX6	non-targets	chr1	-	1	687802-687908	687907	NA	687802	NA
AT1G03010		non-targets	chr1	+	1	696309-696377	696376	NA	NA	696376
AT1G03030		non-targets	chr1	+	1	703790-703833	703856	Yes	703826	703825
AT1G03040		non-targets	chr1	-	1	703889-703930	703920	No	703905	703905
AT1G03060	SPI	non-targets	chr1	-	1	712459-712532	712469	No	712469	712469
AT1G03070	AtLFG4|LFG4	non-targets	chr1	+	1	731463-731565	731567	Yes	731564	731480
AT1G03080	NET1D	permissive	chr1	-	1	731599-731730	731781	No	731703	731703
AT1G03090	MCCA	permissive	chr1	+	1	743891-744235	743945	Yes	743937	743935
AT1G03110	AtTRM82|TRM82	non-targets	chr1	+	1	751908-751983	751908	NA	751908	NA
AT1G03130	PSAD-2	non-targets	chr1	-	1	753416-753494	753493	No	753416	753416
AT1G03140		non-targets	chr1	-	1	754247-754433	754400	No	754376	754376
AT1G03150		NA	chr1	+	1	758511-758693	758637	NA	NA	NA
AT1G03180		non-targets	chr1	+	1	775197-775367	775455	Yes	775366	775327
AT1G03190	ATXPD|UVH6	non-targets	chr1	+	1	780010-780029	780023	Yes	780010	780028
AT1G03210		non-targets	chr1	+	1	784306-784366	784395	No	784351	784351
AT1G03220		non-targets	chr1	+	1	788511-788765	788599	No	788555	788555
AT1G03230		non-targets	chr1	+	1	791472-791673	791636	Yes	791532	791592
AT1G03250		permissive	chr1	-	1	793311-793402	793409	Yes	793351	793317
AT1G03260		permissive	chr1	-	1	795369-795597	795661	Yes	795549	795565
AT1G03280		non-targets	chr1	+	1	806932-807033	807053	Yes	807028	807013
AT1G03290		non-targets	chr1	+	1	810750-810883	810937	Yes	810879	810850
AT1G03330	LSM2	stringent	chr1	-	1	817976-818041	818057	Yes	818013	818006
AT1G03350		non-targets	chr1	-	1	822542-822719	822723	Yes	822664	822637
AT1G03360	ATRRP4|RRP4	permissive	chr1	+	1	826363-826408	826407	NA	826407	NA
AT1G03365		non-targets	chr1	+	3	827999-828000, 828454-828455, 830265-830351	827999, 828454, 830293	Yes	830293	827999
AT1G03370		non-targets	chr1	+	1	835284-835412	835408	Yes	835360	835366
AT1G03380	ATATG18G|ATG18G	non-targets	chr1	+	1	840842-840932	840897	Yes	840897	840844
AT1G03410	2A6	non-targets	chr1	-	1	844472-844588	844636	Yes	844475	844472
AT1G03430	AHP5	non-targets	chr1	+	1	849331-849491	849502	Yes	849490	849362
AT1G03440		non-targets	chr1	+	1	853993-854134	853993	NA	NA	853993
AT1G03445	BSU1	NA	chr1	-	1	854422-854475	854474	NA	NA	NA
AT1G03457	AtBRN2|BRN2	non-targets	chr1	-	1	860654-860853	860781	Yes	860776	860772
AT1G03470	NET3A	non-targets	chr1	-	1	865927-865928	865927	NA	NA	865927
AT1G03475	ATCPO-I|HEMF1|LIN2	non-targets	chr1	-	1	869000-869147	869085	No	869052	869052
AT1G03506|AT1G04197		NA	chr1	-	1	875510-875517	875516	NA	NA	NA
AT1G03520		non-targets	chr1	-	1	877857-877889	877885	Yes	877874	877872
AT1G03550	AtSCAMP4|SCAMP4	non-targets	chr1	-	1	885567-885677	885722	Yes	885571	885622
AT1G03560		non-targets	chr1	-	1	890159-890161	890160	NA	890159	NA
AT1G03590		non-targets	chr1	-	1	894235-894335	894299	No	894272	894272
AT1G03600	PSB27	NA	chr1	+	1	899631-899653	899652	NA	NA	NA
AT1G03610		non-targets	chr1	+	2	901326-901327, 902894-903034	901326, 902896	Yes	902894	902916
AT1G03680	ATHM1|ATM1|THM1|TRX-M1	NA	chr1	-	1	916873-916876	916876	NA	NA	NA
AT1G03687		permissive	chr1	+	1	920550-920555	920555	No	920553	920553
AT1G03730		non-targets	chr1	-	1	930802-930880	930862	Yes	930833	930832
AT1G03740		permissive	chr1	+	3	933653-933654, 935915-935925, 936943-937067	933653, 935924, 937060	Yes	937042	936982
AT1G03746		NA	chr1	-	2	937195-937204, 937381-937439	937203, 937389	NA	NA	NA
AT1G03760		non-targets	chr1	-	1	941063-941101	941119	Yes	941063	941086
AT1G03770	ATRING1B|RING1B	non-targets	chr1	+	1	947510-947700	947655	Yes	947627	947650
AT1G03790	AtTZF4|SOM|TZF4	NA	chr1	+	1	955985-956176	956201	NA	NA	NA
AT1G03820		non-targets	chr1	-	1	959836-959894	959893	Yes	959836	959844
AT1G03840	MGP	non-targets	chr1	-	1	967470-967564	967529	Yes	967504	967470
AT1G03850	ATGRXS13|GRXS13	non-targets	chr1	-	4	975800-975976, 976097-976185, 976878-976879, 977052-977176	976024, 976097, 976878, 977205	Yes	977075	977135
AT1G03860	ATPHB2|PHB2	stringent	chr1	-	1	979310-979416	979472	No	979400	979400
AT1G03870	FLA9	non-targets	chr1	-	1	982348-982574	982647	No	982511	982511
AT1G03900	ABCI18|ATNAP4|NAP4	stringent	chr1	+	1	993055-993190	993157	No	993111	993111
AT1G03905	ABCI19	non-targets	chr1	+	1	995737-995840	995851	Yes	995824	995798
AT1G03910	CTN	permissive	chr1	+	1	1000354-1000505	1000515	No	1000435	1000435
AT1G03920		non-targets	chr1	+	1	1004305-1004396	1004313	Yes	1004382	1004308
AT1G03930	ADK1|CKL9ALPHA|CKL9BETA	non-targets	chr1	+	1	1008260-1008379	1008304	No	1008283	1008283
AT1G03950	VPS2.3	permissive	chr1	-	2	1011149-1011238, 1012647-1012655	1011321, 1012649	No	1011235	1011235
AT1G03970	GBF4	non-targets	chr1	+	1	1019163-1019309	1019234	Yes	1019229	1019210
AT1G04000		non-targets	chr1	-	1	1028039-1028167	1028148	Yes	1028148	1028050
AT1G04020	ATBARD1|BARD1|ROW1	non-targets	chr1	+	1	1040124-1040234	1040233	NA	NA	1040233
AT1G04040		permissive	chr1	-	1	1042109-1042427	1042489	No	1042365	1042365
AT1G04070	ATTOM22-I|TOM22-I	non-targets	chr1	-	1	1050498-1050699	1050814	Yes	1050498	1050568
AT1G04080	PRP39	stringent	chr1	+	1	1056673-1056802	1056787	Yes	1056681	1056782
AT1G04100	IAA10	non-targets	chr1	+	1	1061173-1061210	1061233	Yes	1061200	1061209
AT1G04120	ABCC5|ATABCC5|ATMRP5|MRP5	permissive	chr1	-	1	1064433-1064618	1064579	Yes	1064543	1064579
AT1G04130	AtTPR2|TPR2	non-targets	chr1	+	1	1075462-1075520	1075519	Yes	1075509	1075519
AT1G04140		permissive	chr1	-	1	1075482-1075621	1075546	No	1075544	1075544
AT1G04160	ATXIB|XI-8|XI-B|XIB	permissive	chr1	+	2	1090150-1090157, 1096325-1096502	1090156, 1096634	Yes	1096462	1096501
AT1G04170	EIF2 GAMMA	stringent	chr1	+	1	1099800-1100078	1099985	No	1099894	1099894
AT1G04180	YUC9	non-targets	chr1	+	1	1106176-1106287	1106311	No	1106244	1106244
AT1G04183		NA	chr1	+	1	847763-847766	847765	NA	NA	NA
AT1G04190	TPR3	permissive	chr1	-	1	1106285-1106500	1106529	Yes	1106443	1106447
AT1G04200		permissive	chr1	+	1	1113969-1114133	1114105	No	1114039	1114039
AT1G04210		non-targets	chr1	+	1	1119668-1119725	1119737	Yes	1119689	1119718
AT1G04230		non-targets	chr1	+	1	1128044-1128163	1128073	No	1128070	1128070
AT1G04240	IAA3|SHY2	non-targets	chr1	-	1	1128188-1128263	1128239	Yes	1128239	1128188
AT1G04250	AXR3|IAA17	stringent	chr1	+	3	1136714-1136788, 1137907-1137921, 1138520-1138689	1136749, 1137924, 1138613	No	1138567	1138567
AT1G04260	MPI7|MPIP7|PRA1.D	non-targets	chr1	-	1	1140470-1140653	1140697	No	1140634	1140634
AT1G04270	RPS15	stringent	chr1	-	1	1141603-1141712	1141729	No	1141671	1141671
AT1G04280		non-targets	chr1	-	1	1143530-1143578	1143546	No	1143538	1143538
AT1G04290		permissive	chr1	-	1	1147505-1147613	1147630	No	1147568	1147568
AT1G04295		NA	chr1	+	1	1148425-1148495	1148494	NA	NA	NA
AT1G04300		permissive	chr1	-	2	1148561-1148717, 1150965-1150970	1148755, 1150965	Yes	1148586	1148658
AT1G04310	ERS2	non-targets	chr1	-	1	1154828-1154901	1154913	Yes	1154828	1154843
AT1G04340		permissive	chr1	-	1	1162957-1163182	1163369	Yes	1162996	1162957
AT1G04353		NA	chr1	+	1	1513859-1513860	1513859	NA	NA	NA
AT1G04367		NA	chr1	-	1	1524945-1525120	1524945	NA	NA	NA
AT1G04390		non-targets	chr1	-	1	1179345-1179491	1179472	Yes	1179345	1179384
AT1G04400	AT-PHH1|ATCRY2|CRY2|FHA|PHH1	permissive	chr1	-	1	1185463-1185618	1185577	No	1185559	1185559
AT1G04410	c-NAD-MDH1	stringent	chr1	-	1	1188964-1189242	1189387	No	1189186	1189186
AT1G04420		stringent	chr1	+	1	1193878-1193897	1193897	Yes	1193896	1193884
AT1G04430		stringent	chr1	+	1	1201394-1201541	1201445	No	1201427	1201427
AT1G04440	CKL13	non-targets	chr1	+	1	1205763-1205975	1205834	No	1205802	1205802
AT1G04445		non-targets	chr1	+	1	1208030-1208059	1208057	No	1208057	1208057
AT1G04480		stringent	chr1	+	1	1217352-1217486	1217412	No	1217394	1217394
AT1G04490		non-targets	chr1	-	1	1217792-1218003	1218156	Yes	1217795	1217792
AT1G04510	MAC3A	stringent	chr1	+	1	1230718-1230822	1230843	Yes	1230802	1230803
AT1G04517|AT1G06860		NA	chr1	-	1	2107309-2107321	2107311	NA	NA	NA
AT1G04523		NA	chr1	-	1	2107790-2107791	2107790	NA	NA	NA
AT1G04527|AT1G06880		NA	chr1	-	1	2111059-2111061	2111060	NA	NA	NA
AT1G04530	TPR4	stringent	chr1	-	1	1234176-1234296	1234245	Yes	1234211	1234231
AT1G04550	BDL|IAA12	non-targets	chr1	+	1	1242099-1242138	1242115	Yes	1242115	1242109
AT1G04555		non-targets	chr1	+	2	1243286-1243304, 1243997-1244151	1243299, 1244171	No	1243299	1243299
AT1G04590		non-targets	chr1	-	1	1258576-1258684	1258781	Yes	1258580	1258679
AT1G04610	YUC3	non-targets	chr1	+	3	1280245-1280253, 1281312-1281352, 1281538-1281616	1280252, 1281373, 1281677	Yes	1281341	1281351
AT1G04630	MEE4	permissive	chr1	-	1	1289672-1289807	1289768	No	1289734	1289734
AT1G04640	LIP2	non-targets	chr1	+	1	1293299-1293377	1293376	Yes	1293376	1293350
AT1G04647		NA	chr1	+	1	2621634-2621641	2621640	NA	NA	NA
AT1G04680		non-targets	chr1	-	2	1303527-1303727, 1307492-1307640	1303817, 1307686	Yes	1303667	1303678
AT1G04690	KAB1|KV-BETA1	permissive	chr1	+	1	1315609-1315777	1315799	Yes	1315687	1315728
AT1G04700		non-targets	chr1	+	2	1319353-1319366, 1320851-1320955	1319365, 1320898	Yes	1320918	1320890
AT1G04703		NA	chr1	+	1	3084196-3084250	3084249	NA	NA	NA
AT1G04710	KAT1|PKT4	permissive	chr1	+	1	1324752-1324781	1324783	Yes	1324780	1324755
AT1G04733		NA	chr1	-	1	3180475-3180543	3180582	NA	NA	NA
AT1G04750	AT VAMP7B|ATVAMP721|VAMP721|VAMP7B	stringent	chr1	-	1	1331540-1331716	1331679	No	1331625	1331625
AT1G04753		NA	chr1	-	1	3247732-3247871	3247898	NA	NA	NA
AT1G04770		non-targets	chr1	-	1	1336309-1336466	1336518	No	1336414	1336414
AT1G04780		non-targets	chr1	-	2	1340543-1340715, 1340822-1340832	1340728, 1340830	Yes	1340645	1340647
AT1G04790		permissive	chr1	+	1	1348358-1348459	1348450	Yes	1348450	1348452
AT1G04810		permissive	chr1	+	1	1355352-1355446	1355401	Yes	1355397	1355365
AT1G04820	TOR2|TUA4	stringent	chr1	-	1	1355997-1356312	1356345	Yes	1356252	1356230
AT1G04830		non-targets	chr1	-	1	1358897-1359028	1359055	Yes	1358959	1358998
AT1G04850		stringent	chr1	-	1	1365104-1365204	1365136	No	1365120	1365120
AT1G04860	ATUBP2|UBP2	permissive	chr1	-	1	1369051-1369195	1369230	Yes	1369121	1369172
AT1G04870	ATPRMT10|PRMT10	permissive	chr1	-	1	1373256-1373362	1373313	Yes	1373313	1373334
AT1G04910		permissive	chr1	-	1	1387801-1387894	1387936	Yes	1387859	1387890
AT1G04930		non-targets	chr1	-	1	1396289-1396311	1396309	Yes	1396291	1396292
AT1G04940	atTIC20|AtTic20-I|TIC20|Tic20-I	stringent	chr1	+	1	1400722-1400795	1400765	Yes	1400765	1400722
AT1G04950	ATTAF6|EMB2781|TAF6|TAFII59	permissive	chr1	-	1	1403089-1403190	1403199	Yes	1403187	1403156
AT1G04960		non-targets	chr1	-	1	1407781-1407898	1407862	No	1407826	1407826
AT1G04970		non-targets	chr1	+	1	1413578-1413626	1413653	No	1413621	1413621
AT1G04980	ATPDI10|ATPDIL2-2|PDI10|PDIL2-2	permissive	chr1	-	1	1413646-1413777	1413853	Yes	1413722	1413719
AT1G04985		stringent	chr1	-	1	1416291-1416417	1416361	No	1416342	1416342
AT1G04990		non-targets	chr1	-	1	1419026-1419172	1419152	Yes	1419100	1419089
AT1G05000	AtPFA-DSP1|PFA-DSP1	permissive	chr1	+	2	1428530-1428547, 1428620-1428879	1428530, 1428934	Yes	1428781	1428530
AT1G05010	ACO4|EAT1|EFE	non-targets	chr1	-	1	1431248-1431318	1431260	Yes	1431253	1431260
AT1G05030		non-targets	chr1	-	1	1438049-1438220	1438294	Yes	1438049	1438104
AT1G05055	ATGTF2H2|GTF2H2	permissive	chr1	-	1	1448718-1448792	1448840	Yes	1448779	1448718
AT1G05060		non-targets	chr1	-	1	1451040-1451081	1451088	Yes	1451057	1451056
AT1G05070		non-targets	chr1	-	1	1457014-1457138	1457124	Yes	1457042	1457044
AT1G05090		non-targets	chr1	+	1	1465718-1465812	1465855	Yes	1465798	1465797
AT1G05100	MAPKKK18	non-targets	chr1	+	1	1470783-1470952	1470902	Yes	1470881	1470819
AT1G05120		permissive	chr1	-	1	1471264-1471460	1471492	Yes	1471412	1471264
AT1G05140		non-targets	chr1	+	1	1484040-1484050	1484049	NA	1484049	NA
AT1G05143		NA	chr1	-	1	5178992-5179096	5179095	NA	NA	NA
AT1G05150		non-targets	chr1	-	1	1484049-1484149	1484100	Yes	1484066	1484100
AT1G05160	ATKAO1|CYP88A3|KAO1	non-targets	chr1	-	1	1487407-1487423	1487422	NA	1487407	NA
AT1G05163|AT1G15405		NA	chr1	-	1	5297863-5297948	5297956	NA	NA	NA
AT1G05170		non-targets	chr1	-	1	1491003-1491161	1491250	Yes	1491111	1491147
AT1G05180	AXR1	stringent	chr1	-	1	1498204-1498290	1498226	Yes	1498225	1498206
AT1G05183		NA	chr1	+	1	5403957-5403984	5403957	NA	NA	NA
AT1G05190	emb2394	stringent	chr1	-	1	1502346-1502441	1502489	Yes	1502346	1502364
AT1G05200	ATGLR3.4|GLR3.4|GLUR3	non-targets	chr1	+	1	1509117-1509152	1509148	No	1509148	1509148
AT1G05205		permissive	chr1	-	1	1509098-1509240	1509312	No	1509207	1509207
AT1G05210		permissive	chr1	+	1	1511627-1511683	1511736	Yes	1511681	1511682
AT1G05220		non-targets	chr1	+	1	1512659-1512881	1512966	Yes	1512837	1512880
AT1G05240		NA	chr1	+	1	1522591-1522722	1522720	NA	NA	NA
AT1G05250	AtPRX1|PRX2	non-targets	chr1	-	1	1525648-1525802	1525777	No	1525713	1525713
AT1G05260	RCI3|RCI3A	non-targets	chr1	+	2	1530692-1530696, 1531366-1531439	1530695, 1531477	No	1531433	1531433
AT1G05267|AT1G05273		NA	chr1	+	1	5758579-5758586	5758581	NA	NA	NA
AT1G05270		non-targets	chr1	-	1	1531638-1531722	1531642	No	1531640	1531640
AT1G05280		permissive	chr1	-	2	1534917-1534947, 1535418-1535478	1534946, 1535477	Yes	1534946	1535418
AT1G05300	ZIP5	non-targets	chr1	-	1	1544960-1545113	1545112	Yes	1544960	1544962
AT1G05320		non-targets	chr1	+	1	1557692-1557845	1557780	Yes	1557745	1557732
AT1G05340		non-targets	chr1	-	1	1558774-1558955	1558984	No	1558884	1558884
AT1G05350		permissive	chr1	-	1	1560625-1560787	1560828	Yes	1560702	1560752
AT1G05360	KMS2	permissive	chr1	+	1	1567420-1567538	1567548	Yes	1567460	1567509
AT1G05380		non-targets	chr1	+	1	1582605-1582611	1582610	No	1582608	1582608
AT1G05410		non-targets	chr1	-	1	1585428-1585431	1585430	NA	NA	1585428
AT1G05420	ATOFP12|OFP12	non-targets	chr1	+	1	1590866-1591014	1590960	Yes	1590960	1591006
AT1G05430		non-targets	chr1	-	1	1594054-1594122	1594069	Yes	1594060	1594064
AT1G05490	chr31	NA	chr1	-	1	1618600-1618641	1618640	NA	NA	NA
AT1G05500	ATSYTE|NTMC2T2.1|NTMC2TYPE2.1|SYT5|SYTE	permissive	chr1	+	1	1629135-1629302	1629283	No	1629223	1629223
AT1G05510		NA	chr1	+	1	1629880-1629891	1629892	NA	NA	NA
AT1G05520		permissive	chr1	-	1	1630729-1630932	1631017	Yes	1630867	1630781
AT1G05530	UGT2|UGT75B2	non-targets	chr1	-	1	1636212-1636298	1636322	No	1636273	1636273
AT1G05560	UGT1|UGT75B1	non-targets	chr1	-	2	1645267-1645380, 1645456-1645606	1645351, 1645594	Yes	1645519	1645573
AT1G05570	ATGSL06|ATGSL6|CALS1|GSL06|GSL6	permissive	chr1	-	1	1647587-1647773	1647752	No	1647752	1647752
AT1G05575		non-targets	chr1	-	1	1661515-1661732	1661695	Yes	1661690	1661695
AT1G05590	ATHEX3|HEXO2	non-targets	chr1	+	1	1671868-1671881	1671873	Yes	1671873	1671871
AT1G05620	NSH2|URH2	permissive	chr1	+	1	1681648-1681712	1681760	No	1681704	1681704
AT1G05630	5PTASE13|AT5PTASE13	non-targets	chr1	+	1	1687402-1687436	1687426	No	1687423	1687423
AT1G05650		non-targets	chr1	-	2	1690118-1690182, 1691431-1691634	1690125, 1691750	No	1690122	1690122
AT1G05660		non-targets	chr1	-	2	1694073-1694188, 1695378-1695541	1694196, 1695427	No	1694142	1694142
AT1G05670		non-targets	chr1	-	1	1697541-1697626	1697625	NA	1697541	NA
AT1G05675		non-targets	chr1	-	1	1701100-1701188	1701187	NA	NA	1701100
AT1G05680	UGT74E2	non-targets	chr1	-	1	1703057-1703149	1703132	No	1703098	1703098
AT1G05690	BT3	non-targets	chr1	+	1	1709273-1709326	1709325	NA	NA	1709325
AT1G05710		non-targets	chr1	+	1	1717177-1717270	1717285	No	1717269	1717269
AT1G05720		permissive	chr1	-	1	1717375-1717508	1717532	Yes	1717484	1717472
AT1G05730		non-targets	chr1	+	1	1720329-1720383	1720382	NA	NA	1720382
AT1G05780		non-targets	chr1	+	1	1728354-1728419	1728447	No	1728403	1728403
AT1G05785		non-targets	chr1	+	1	1732563-1732678	1732624	No	1732601	1732601
AT1G05790		permissive	chr1	+	1	1737466-1737505	1737504	Yes	1737503	1737468
AT1G05805		non-targets	chr1	+	2	1747258-1747259, 1747553-1747716	1747258, 1747765	No	1747691	1747691
AT1G05810	ARA|ARA-1|ATRAB11D|ATRABA5E|RABA5E	permissive	chr1	+	1	1749422-1749577	1749566	No	1749508	1749508
AT1G05820	ATSPPL5|SPPL5	non-targets	chr1	+	1	1753970-1754029	1754029	Yes	1753996	1754022
AT1G05830	ATX2|SDG30	non-targets	chr1	+	2	1757255-1757259, 1761711-1761817	1757258, 1761826	Yes	1757258	1761816
AT1G05840		permissive	chr1	-	1	1762728-1762814	1762806	Yes	1762771	1762728
AT1G05850	ATCTL1|CTL1|ELP|ELP1|ERH2|HOT2|POM1	stringent	chr1	-	1	1766544-1766663	1766658	No	1766602	1766602
AT1G05853		NA	chr1	-	1	8524899-8524998	8524899	NA	NA	NA
AT1G05860		non-targets	chr1	+	2	1771114-1771149, 1771294-1771312	1771148, 1771325	Yes	1771310	1771311
AT1G05870		non-targets	chr1	-	2	1771403-1771523, 1772213-1772259	1771551, 1772236	Yes	1772215	1772236
AT1G05890	ARI5|ATARI5	permissive	chr1	+	2	1781856-1781874, 1784450-1784543	1781860, 1784532	No	1781859	1781859
AT1G05900	ATNTH2|NTH2	non-targets	chr1	+	1	1789665-1789676	1789666	Yes	1789670	1789666
AT1G05907|AT1G05913|AT1G05917		NA	chr1	-	1	8756225-8756409	8756383	NA	NA	NA
AT1G05910		permissive	chr1	+	1	1796647-1796730	1796729	Yes	1796658	1796729
AT1G05940	CAT9	non-targets	chr1	-	1	1801168-1801223	1801178	No	1801177	1801177
AT1G05960		permissive	chr1	-	1	1807901-1808018	1808019	No	1807965	1807965
AT1G05970		non-targets	chr1	-	1	1816053-1816130	1816129	Yes	1816063	1816053
AT1G05993|AT1G05997|AT1G26235		NA	chr1	-	1	9076228-9076312	9076318	NA	NA	NA
AT1G06000		non-targets	chr1	-	1	1820282-1820385	1820388	No	1820335	1820335
AT1G06002		NA	chr1	+	1	1821848-1821923	1821921	NA	NA	NA
AT1G06010		permissive	chr1	+	1	1823909-1824055	1823950	Yes	1823945	1823930
AT1G06040	BBX24|STO	NA	chr1	-	1	1828340-1828574	1828599	NA	NA	NA
AT1G06050		non-targets	chr1	-	1	1830451-1830575	1830575	Yes	1830451	1830523
AT1G06060		permissive	chr1	+	1	1834799-1834892	1834887	Yes	1834860	1834833
AT1G06070		non-targets	chr1	-	1	1834865-1834986	1835094	Yes	1834865	1834867
AT1G06090		non-targets	chr1	+	1	1849607-1849716	1849776	No	1849692	1849692
AT1G06110	SKIP16	permissive	chr1	-	1	1853055-1853138	1853207	No	1853132	1853132
AT1G06113		NA	chr1	+	1	9794739-9794817	9794806	NA	NA	NA
AT1G06120		non-targets	chr1	+	1	1857598-1857771	1857815	Yes	1857717	1857696
AT1G06130	GLX2-4	permissive	chr1	-	1	1857758-1857850	1857832	Yes	1857767	1857766
AT1G06150	EMB1444	permissive	chr1	-	1	1868989-1868990	1868989	NA	NA	1868989
AT1G06180	ATMYB13|ATMYBLFGN|MYB13	non-targets	chr1	+	1	1891094-1891160	1891185	No	1891157	1891157
AT1G06190	RHON1	non-targets	chr1	-	1	1892258-1892339	1892283	Yes	1892272	1892258
AT1G06197		NA	chr1	-	1	10127566-10127571	10127570	NA	NA	NA
AT1G06200		permissive	chr1	-	2	1894249-1894436, 1896632-1896687	1894478, 1896687	Yes	1894399	1894401
AT1G06210		permissive	chr1	+	1	1899104-1899215	1899293	No	1899205	1899205
AT1G06220	CLO|GFA1|MEE5	permissive	chr1	+	1	1904731-1904888	1904817	Yes	1904753	1904796
AT1G06230	GTE4	permissive	chr1	+	2	1909414-1909421, 1910800-1910874	1909420, 1910860	Yes	1910849	1910852
AT1G06233|AT1G06237|AT1G06243|AT1G06247		NA	chr1	+	1	10300441-10300810	10300708	NA	NA	NA
AT1G06240		non-targets	chr1	+	1	1913105-1913299	1913160	NA	NA	1913160
AT1G06263|AT1G06267|AT1G06273		NA	chr1	+	1	10309040-10309087	10309086	NA	NA	NA
AT1G06290	ACX3|ATACX3	permissive	chr1	+	1	1926153-1926304	1926269	Yes	1926215	1926211
AT1G06320		non-targets	chr1	+	1	1931561-1931593	1931592	NA	1931592	NA
AT1G06330		non-targets	chr1	-	1	1931517-1931587	1931586	NA	1931517	NA
AT1G06380		non-targets	chr1	+	1	1946045-1946076	1946075	NA	1946075	NA
AT1G06390	ATGSK1|ATSK2-3|ATSK22|BIL2|GSK1|SK22	NA	chr1	+	1	1950697-1950816	1950749	NA	NA	NA
AT1G06400	ARA-2|ARA2|ATRAB11E|ATRABA1A	stringent	chr1	-	1	1950822-1950943	1950993	Yes	1950917	1950906
AT1G06410	ATTPS7|ATTPSA|TPS7	stringent	chr1	+	1	1958626-1958812	1958779	No	1958713	1958713
AT1G06430	FTSH8	stringent	chr1	-	1	1960060-1960108	1960128	Yes	1960060	1960081
AT1G06450		non-targets	chr1	+	1	1967199-1967246	1967251	Yes	1967245	1967221
AT1G06460	ACD31.2|ACD32.1	non-targets	chr1	-	1	1967091-1967097	1967096	NA	NA	1967091
AT1G06463		NA	chr1	-	1	11435784-11435789	11435788	NA	NA	NA
AT1G06467		NA	chr1	-	1	11436072-11436191	11436072	NA	NA	NA
AT1G06470		permissive	chr1	+	1	1973656-1973790	1973808	Yes	1973766	1973755
AT1G06475		non-targets	chr1	-	1	1973765-1973838	1973835	Yes	1973798	1973835
AT1G06515		NA	chr1	-	1	1990596-1990737	1990691	NA	NA	NA
AT1G06530	PMD2	non-targets	chr1	+	1	2002678-2002761	2002694	No	2002691	2002691
AT1G06537		NA	chr1	-	1	11672178-11672229	11672239	NA	NA	NA
AT1G06547|AT1G32385		NA	chr1	+	1	11685100-11685153	11685185	NA	NA	NA
AT1G06550		permissive	chr1	-	1	2003621-2003727	2003767	Yes	2003695	2003694
AT1G06553		NA	chr1	+	2	11685360-11685377, 11685437-11685473	11685376, 11685462	NA	NA	NA
AT1G06570	HPD|HPPD|PDS1	non-targets	chr1	-	1	2011882-2011960	2011893	No	2011891	2011891
AT1G06590		permissive	chr1	-	1	2016303-2016320	2016319	Yes	2016303	2016312
AT1G06620		non-targets	chr1	+	2	2026250-2026294, 2027189-2027377	2026291, 2027318	Yes	2027241	2027282
AT1G06630		non-targets	chr1	+	1	2029552-2029618	2029592	Yes	2029588	2029590
AT1G06640		permissive	chr1	+	1	2033892-2034068	2033995	Yes	2033953	2033935
AT1G06645		non-targets	chr1	+	1	2035677-2035794	2035793	NA	NA	2035793
AT1G06667		NA	chr1	+	1	12084000-12084061	12084102	NA	NA	NA
AT1G06670	NIH	non-targets	chr1	+	1	2047495-2047612	2047611	NA	NA	2047611
AT1G06673|AT1G33370		NA	chr1	-	1	12097180-12097189	12097188	NA	NA	NA
AT1G06680	OE23|OEE2|PSBP-1|PSII-P	stringent	chr1	+	1	2049271-2049387	2049441	Yes	2049366	2049364
AT1G06690		permissive	chr1	-	1	2049614-2049625	2049624	Yes	2049614	2049616
AT1G06700		stringent	chr1	-	2	2052375-2052560, 2052597-2052616	2052542, 2052598	Yes	2052483	2052482
AT1G06730		non-targets	chr1	+	1	2070307-2070446	2070448	Yes	2070325	2070444
AT1G06760		non-targets	chr1	-	1	2076414-2076619	2076511	No	2076507	2076507
AT1G06773		NA	chr1	-	1	12602744-12602765	12602764	NA	NA	NA
AT1G06780	GAUT6	non-targets	chr1	+	1	2086960-2087134	2087175	No	2087131	2087131
AT1G06800	PLA-I{gamma}1	non-targets	chr1	-	2	2089401-2089454, 2089986-2090006	2089402, 2090005	No	2089402	2089402
AT1G06820	CCR2|CRTISO	permissive	chr1	-	1	2092949-2092978	2092984	Yes	2092969	2092949
AT1G06840		non-targets	chr1	-	1	2097568-2097725	2097739	Yes	2097631	2097624
AT1G06850	AtbZIP52|bZIP52	non-targets	chr1	+	1	2106662-2106863	2106791	No	2106748	2106748
AT1G06870	Plsp2A	non-targets	chr1	+	1	2110871-2111149	2111021	Yes	2110975	2110947
AT1G06890		permissive	chr1	-	2	2111334-2111500, 2111564-2111701	2111385, 2111762	No	2111670	2111670
AT1G06900		permissive	chr1	-	1	2114947-2115011	2114991	Yes	2114947	2114991
AT1G06923		non-targets	chr1	+	1	2127494-2127596	2127609	Yes	2127567	2127568
AT1G06930		non-targets	chr1	+	1	2129785-2129847	2129846	Yes	2129846	2129824
AT1G06950	ATTIC110|TIC110	stringent	chr1	-	1	2130137-2130221	2130159	No	2130159	2130159
AT1G06960		non-targets	chr1	+	1	2137687-2137728	2137715	Yes	2137715	2137711
AT1G06963		NA	chr1	+	1	13502457-13502475	13502473	NA	NA	NA
AT1G07000	ATEXO70B2|EXO70B2	non-targets	chr1	-	1	2150188-2150267	2150214	No	2150190	2150190
AT1G07020		non-targets	chr1	-	1	2155100-2155281	2155303	No	2155216	2155216
AT1G07030		permissive	chr1	-	1	2158408-2158465	2158427	No	2158419	2158419
AT1G07040		non-targets	chr1	-	1	2160938-2161106	2161178	No	2161100	2161100
AT1G07070		permissive	chr1	+	1	2169795-2169965	2169846	Yes	2169815	2169833
AT1G07080		stringent	chr1	+	1	2171988-2172194	2172064	No	2172027	2172027
AT1G07090	LSH6	non-targets	chr1	-	3	2173932-2174143, 2174812-2174813, 2174856-2174857	2174142, 2174812, 2174856	Yes	2174812	2173932
AT1G07110	ATF2KP|F2KP|FKFBP	stringent	chr1	-	1	2178103-2178181	2178186	No	2178150	2178150
AT1G07128		NA	chr1	-	1	2187643-2187773	2187760	NA	NA	NA
AT1G07130	ATSTN1|STN1	non-targets	chr1	+	1	2188630-2188767	2188766	Yes	2188732	2188766
AT1G07135		non-targets	chr1	-	1	2189921-2190026	2189965	No	2189939	2189939
AT1G07140	SIRANBP	stringent	chr1	-	1	2191728-2192062	2192206	No	2192011	2192011
AT1G07143		NA	chr1	+	1	16132044-16132110	16132074	NA	NA	NA
AT1G07150	MAPKKK13	non-targets	chr1	-	1	2194361-2194486	2194458	No	2194428	2194428
AT1G07160		NA	chr1	-	2	2197841-2197854, 2197957-2198018	2197853, 2198017	NA	NA	NA
AT1G07170		permissive	chr1	+	1	2201094-2201270	2201181	Yes	2201158	2201135
AT1G07175		non-targets	chr1	+	2	2202834-2203004, 2203270-2203399	2203032, 2203398	Yes	2202892	2202988
AT1G07200	SMXL6	non-targets	chr1	-	1	2208622-2208886	2208791	Yes	2208732	2208729
AT1G07210		permissive	chr1	+	1	2216901-2216986	2217040	No	2216976	2216976
AT1G07220		non-targets	chr1	-	1	2217003-2217041	2217040	NA	NA	2217040
AT1G07230	NPC1	non-targets	chr1	-	1	2220250-2220480	2220378	Yes	2220378	2220251
AT1G07240	UGT71C5	non-targets	chr1	+	1	2225372-2225675	2225492	No	2225447	2225447
AT1G07250	UGT71C4	non-targets	chr1	+	1	2227493-2227610	2227570	No	2227564	2227564
AT1G07260	UGT71C3	non-targets	chr1	-	1	2227590-2227659	2227601	Yes	2227594	2227601
AT1G07300		non-targets	chr1	-	1	2245626-2245729	2245728	Yes	2245653	2245728
AT1G07310		non-targets	chr1	-	1	2247490-2247597	2247558	No	2247525	2247525
AT1G07350	SR45a	permissive	chr1	-	1	2257367-2257585	2257537	Yes	2257426	2257529
AT1G07360	MAC5A	non-targets	chr1	-	1	2260314-2260452	2260488	Yes	2260391	2260388
AT1G07370	ATPCNA1|PCNA1	non-targets	chr1	+	1	2264530-2264573	2264537	No	2264534	2264534
AT1G07380		non-targets	chr1	-	1	2264657-2264683	2264658	No	2264658	2264658
AT1G07400		non-targets	chr1	+	1	2275700-2275941	2275825	No	2275765	2275765
AT1G07407		NA	chr1	-	1	17498943-17498944	17498943	NA	NA	NA
AT1G07410	ATRAB-A2B|ATRABA2B|RAB-A2B|RABA2b	non-targets	chr1	+	1	2277324-2277404	2277422	Yes	2277392	2277395
AT1G07420	ATSMO1|SMO2-1	permissive	chr1	+	1	2280230-2280441	2280330	Yes	2280285	2280298
AT1G07470		permissive	chr1	+	1	2294514-2294605	2294646	No	2294587	2294587
AT1G07480		non-targets	chr1	-	1	2296392-2296550	2296503	No	2296474	2296474
AT1G07500		non-targets	chr1	-	1	2304544-2304579	2304578	Yes	2304568	2304544
AT1G07510	ftsh10	non-targets	chr1	+	1	2309495-2309548	2309564	No	2309541	2309541
AT1G07530	ATGRAS2|GRAS2|SCL14	non-targets	chr1	-	1	2313450-2313615	2313582	No	2313581	2313581
AT1G07570	APK1|APK1A	non-targets	chr1	-	1	2331136-2331235	2331138	Yes	2331138	2331136
AT1G07590		stringent	chr1	-	1	2336311-2336590	2336708	No	2336536	2336536
AT1G07600	ATMT-2|ATMT-Q|ATMT1|LSR4|MT-Q|MT1|MT1A	NA	chr1	-	1	2338522-2338723	2338769	NA	NA	NA
AT1G07610	MT1C	non-targets	chr1	+	1	2342027-2342149	2342118	No	2342074	2342074
AT1G07630	PLL5	non-targets	chr1	+	1	2351543-2351704	2351578	Yes	2351562	2351691
AT1G07640	OBP2|URP3	non-targets	chr1	-	1	2354339-2354393	2354367	No	2354353	2354353
AT1G07650		non-targets	chr1	-	1	2359714-2359736	2359714	NA	NA	2359714
AT1G07660		non-targets	chr1	+	1	2369700-2369734	2369736	No	2369733	2369733
AT1G07670	ATECA4|ECA4	non-targets	chr1	-	1	2370022-2370215	2370335	Yes	2370176	2370192
AT1G07690		non-targets	chr1	+	1	2379187-2379197	2379196	NA	NA	2379196
AT1G07700		stringent	chr1	+	1	2381265-2381361	2381265	Yes	2381353	2381265
AT1G07705	NOT2a	non-targets	chr1	+	1	2386070-2386071	2386070	No	2386070	2386070
AT1G07728		NA	chr1	+	1	2397254-2397381	2397432	NA	NA	NA
AT1G07740		non-targets	chr1	-	1	2397396-2397470	2397469	No	2397396	2397396
AT1G07745	ATRAD51D|RAD51D|SSN1	non-targets	chr1	-	1	2400656-2400657	2400656	No	2400656	2400656
AT1G07750		permissive	chr1	-	1	2403969-2404159	2404209	No	2404099	2404099
AT1G07770	RPS15A	stringent	chr1	-	1	2408202-2408301	2408323	Yes	2408263	2408264
AT1G07780	PAI1|TRP6	non-targets	chr1	-	1	2410120-2410181	2410120	No	2410120	2410120
AT1G07790	HTB1	non-targets	chr1	+	1	2413634-2413759	2413664	Yes	2413657	2413659
AT1G07795		non-targets	chr1	+	1	2414813-2414918	2414894	Yes	2414872	2414879
AT1G07810	ACA3|ATECA1|ECA1	permissive	chr1	+	1	2420685-2420853	2420799	No	2420753	2420753
AT1G07820		non-targets	chr1	-	1	2421054-2421276	2421221	No	2421218	2421218
AT1G07830		permissive	chr1	+	1	2423597-2423644	2423649	Yes	2423643	2423604
AT1G07840		permissive	chr1	+	1	2426568-2426675	2426591	Yes	2426573	2426674
AT1G07870		non-targets	chr1	-	1	2429678-2429743	2429760	Yes	2429698	2429697
AT1G07890	APX1|ATAPX01|ATAPX1|CS1|MEE6	stringent	chr1	+	1	2439587-2439854	2439714	Yes	2439650	2439651
AT1G07897|AT1G53542|AT1G07903		non-targets	chr1	+	1	19981695-19981951	19982023	NA	NA	NA
AT1G07902		non-targets	chr1	+	2	2444903-2444921, 2445121-2445264	2444920, 2445263	Yes	2445126	2445263
AT1G07910	AtRLG1|ATRNL|RNL	permissive	chr1	+	1	2454556-2454654	2454653	NA	2454653	NA
AT1G07920		stringent	chr1	+	1	2457213-2457396	2457300	No	2457257	2457257
AT1G07930		stringent	chr1	+	1	2460654-2460805	2460731	No	2460693	2460693
AT1G07940		stringent	chr1	-	1	2462899-2463131	2463246	No	2463087	2463087
AT1G07950	MED22B	non-targets	chr1	-	1	2465721-2465845	2465920	No	2465823	2465823
AT1G07960	ATPDIL5-1|PDIL5-1	permissive	chr1	+	1	2469045-2469244	2469175	Yes	2469151	2469089
AT1G07980	NF-YC10	permissive	chr1	-	1	2473186-2473339	2473403	Yes	2473252	2473248
AT1G07985		non-targets	chr1	+	1	2475989-2476201	2476174	Yes	2476018	2476147
AT1G07990		non-targets	chr1	+	1	2483016-2483194	2483224	Yes	2483121	2483193
AT1G08000	GATA10	non-targets	chr1	-	1	2483238-2483242	2483241	NA	2483238	NA
AT1G08010	GATA11	non-targets	chr1	-	1	2485855-2486008	2485954	No	2485925	2485925
AT1G08030	AQC1|TPST	non-targets	chr1	-	1	2489394-2489584	2489534	Yes	2489534	2489418
AT1G08040		permissive	chr1	-	1	2495345-2495370	2495352	Yes	2495348	2495349
AT1G08050		non-targets	chr1	-	1	2498798-2498926	2498990	No	2498901	2498901
AT1G08060	MOM|MOM1	non-targets	chr1	-	1	2501661-2501776	2501775	Yes	2501661	2501775
AT1G08103|AT1G08107|AT1G08113|AT1G08117		NA	chr1	-	1	21052345-21052491	21052351	NA	NA	NA
AT1G08110		stringent	chr1	+	1	2537825-2537934	2537962	Yes	2537878	2537929
AT1G08125		permissive	chr1	-	1	2539586-2539643	2539645	Yes	2539642	2539640
AT1G08130	ATLIG1|LIG1	permissive	chr1	-	1	2542708-2542779	2542769	Yes	2542748	2542769
AT1G08160		non-targets	chr1	-	1	2559409-2559557	2559571	Yes	2559409	2559497
AT1G08180		non-targets	chr1	-	1	2564541-2564628	2564627	Yes	2564563	2564541
AT1G08190	ATVAM2|ATVPS41|VAM2|VPS41|ZIP2	permissive	chr1	+	1	2573326-2573515	2573438	No	2573388	2573388
AT1G08200	AXS2	stringent	chr1	-	1	2573830-2574046	2574154	No	2574000	2574000
AT1G08210		permissive	chr1	-	1	2577020-2577052	2577049	Yes	2577037	2577036
AT1G08213		NA	chr1	+	1	21616822-21616856	21616855	NA	NA	NA
AT1G08220		permissive	chr1	-	1	2581046-2581055	2581054	NA	2581046	NA
AT1G08230		non-targets	chr1	-	2	2583599-2583830, 2586002-2586147	2583853, 2586188	Yes	2586083	2586125
AT1G08250	ADT6|AtADT6	non-targets	chr1	-	1	2588852-2588972	2588971	Yes	2588852	2588878
AT1G08280		non-targets	chr1	+	1	2609769-2609853	2609876	Yes	2609842	2609852
AT1G08283		NA	chr1	-	1	22076495-22076624	22076586	NA	NA	NA
AT1G08315		non-targets	chr1	-	1	2620305-2620465	2620376	No	2620341	2620341
AT1G08320	bZIP21|TGA9	non-targets	chr1	-	1	2621741-2621977	2622053	No	2621971	2621971
AT1G08340		non-targets	chr1	+	1	2632763-2632845	2632845	Yes	2632819	2632816
AT1G08347|AT1G60820		NA	chr1	-	1	22394546-22394602	22394548	NA	NA	NA
AT1G08350		permissive	chr1	-	1	2632849-2632872	2632849	No	2632849	2632849
AT1G08360		stringent	chr1	+	1	2637816-2637956	2637929	Yes	2637850	2637898
AT1G08370	ATDCP1|DCP1	permissive	chr1	+	1	2640509-2640554	2640580	Yes	2640553	2640543
AT1G08380	PSAO	NA	chr1	-	1	2640812-2640946	2640966	NA	NA	NA
AT1G08390		permissive	chr1	+	1	2643235-2643281	2643271	NA	2643271	NA
AT1G08420	BSL2	non-targets	chr1	+	1	2656986-2657220	2657080	No	2657062	2657062
AT1G08450	AtCRT3|CRT3|EBS2|PSL1	non-targets	chr1	-	1	2667822-2667884	2667931	Yes	2667829	2667880
AT1G08460	ATHDA8|HDA08|HDA8	permissive	chr1	+	1	2674554-2674752	2674660	No	2674611	2674611
AT1G08470	SSL3	non-targets	chr1	-	1	2682098-2682159	2682174	No	2682126	2682126
AT1G08480	SDH6	stringent	chr1	+	1	2685546-2685741	2685633	No	2685597	2685597
AT1G08490	ATCPNIFS|ATNFS2|ATSUFS|CPNIFS|SUFS	stringent	chr1	-	1	2685687-2685736	2685687	No	2685687	2685687
AT1G08500	AtENODL18|ENODL18	non-targets	chr1	+	1	2689946-2690295	2690131	No	2690044	2690044
AT1G08510	FATB	non-targets	chr1	-	1	2690971-2691252	2691314	Yes	2691201	2691192
AT1G08520	ALB-1V|ALB1|CHLD|PDE166|V157	stringent	chr1	+	1	2700911-2700934	2700942	Yes	2700931	2700933
AT1G08530		non-targets	chr1	+	1	2703063-2703156	2703155	No	2703155	2703155
AT1G08540	ABC1|ATSIG1|ATSIG2|SIG1|SIG2|SIGA|SIGB	non-targets	chr1	+	1	2706774-2706830	2706810	Yes	2706779	2706810
AT1G08570	ACHT4	non-targets	chr1	+	1	2714667-2714844	2714796	No	2714733	2714733
AT1G08580		permissive	chr1	-	2	2715079-2715222, 2715471-2715513	2715125, 2715495	Yes	2715477	2715146
AT1G08590		non-targets	chr1	+	1	2722155-2722349	2722197	Yes	2722196	2722185
AT1G08620	PKDM7D	permissive	chr1	+	2	2738530-2738532, 2743693-2743874	2738531, 2743991	Yes	2743873	2743853
AT1G08640	CJD1	NA	chr1	-	1	2748409-2748455	2748454	NA	NA	NA
AT1G08643		NA	chr1	+	1	23701286-23701406	23701317	NA	NA	NA
AT1G08650	ATPPCK1|PPCK1	non-targets	chr1	+	1	2753645-2753797	2753747	Yes	2753696	2753702
AT1G08660	MGP2	non-targets	chr1	-	1	2756929-2757091	2757081	Yes	2757040	2757039
AT1G08670		non-targets	chr1	-	1	2760332-2760363	2760378	No	2760362	2760362
AT1G08700	PS1	non-targets	chr1	-	1	2769722-2769858	2769890	Yes	2769777	2769722
AT1G08710		non-targets	chr1	+	1	2773450-2773484	2773453	No	2773452	2773452
AT1G08720	ATEDR1|EDR1	non-targets	chr1	+	1	2779220-2779337	2779314	Yes	2779285	2779265
AT1G08750		non-targets	chr1	+	1	2804479-2804594	2804527	No	2804507	2804507
AT1G08760		non-targets	chr1	+	2	2805326-2805359, 2808530-2808622	2805358, 2808664	Yes	2808600	2808598
AT1G08770	PRA1.E	non-targets	chr1	+	1	2809701-2809760	2809758	No	2809743	2809743
AT1G08780	AIP3|PFD4	permissive	chr1	-	1	2809773-2809856	2809846	Yes	2809820	2809794
AT1G08800		non-targets	chr1	-	2	2813024-2813104, 2814798-2814871	2813083, 2814872	No	2813062	2813062
AT1G08810	AtMYB60|MYB60	non-targets	chr1	-	1	2819067-2819211	2819210	NA	NA	2819067
AT1G08820	VAP27-2	non-targets	chr1	-	1	2821325-2821594	2821593	Yes	2821548	2821592
AT1G08830	CSD1	stringent	chr1	+	1	2829203-2829372	2829307	No	2829255	2829255
AT1G08845		non-targets	chr1	+	1	2841011-2841099	2841098	NA	NA	2841098
AT1G08880	G-H2AX|GAMMA-H2AX|H2AXA|HTA5	non-targets	chr1	-	1	2846908-2847025	2847054	No	2846988	2846988
AT1G08890		non-targets	chr1	+	1	2852146-2852301	2852292	Yes	2852240	2852224
AT1G08910		non-targets	chr1	+	1	2860978-2861152	2861314	No	2861151	2861151
AT1G08920	ESL1	non-targets	chr1	+	1	2870544-2870680	2870634	No	2870589	2870589
AT1G08930	ERD6	permissive	chr1	+	1	2877100-2877212	2877227	No	2877168	2877168
AT1G08937		NA	chr1	+	1	25262689-25262705	25262704	NA	NA	NA
AT1G08940		non-targets	chr1	+	1	2879119-2879230	2879167	Yes	2879167	2879163
AT1G08970	HAP5C|NF-YC9	permissive	chr1	+	2	2883959-2884024, 2884224-2884351	2884041, 2884254	No	2884246	2884246
AT1G08973		NA	chr1	-	1	25596538-25596582	25596581	NA	NA	NA
AT1G08980	AMI1|ATAMI1|ATTOC64-I|TOC64-I	permissive	chr1	+	1	2886607-2886618	2886617	NA	NA	2886617
AT1G08990	GUX5|PGSIP5	non-targets	chr1	+	1	2890863-2890979	2890908	No	2890906	2890906
AT1G09010		permissive	chr1	-	1	2895174-2895206	2895178	No	2895177	2895177
AT1G09020	ATSNF4|SNF4	stringent	chr1	-	1	2899898-2899982	2899943	Yes	2899914	2899927
AT1G09027		NA	chr1	-	1	25926947-25926967	25926968	NA	NA	NA
AT1G09060		non-targets	chr1	-	1	2921090-2921109	2921102	Yes	2921102	2921090
AT1G09070	(AT)SRC2|AtSRC2|SRC2	non-targets	chr1	+	1	2928849-2929073	2928939	No	2928895	2928895
AT1G09083		NA	chr1	+	1	26190425-26190437	26190441	NA	NA	NA
AT1G09090	ATRBOHB|ATRBOHB-BETA|RBOHB	non-targets	chr1	+	1	2936577-2936618	2936601	No	2936601	2936601
AT1G09130		stringent	chr1	-	1	2939526-2939683	2939720	Yes	2939628	2939618
AT1G09140	At-SR30|ATSRP30|ATSRP30.1|ATSRP30.2|SR30	permissive	chr1	-	1	2942525-2942674	2942688	No	2942613	2942613
AT1G09150		stringent	chr1	+	1	2949056-2949172	2949137	No	2949109	2949109
AT1G09160		permissive	chr1	-	1	2952793-2952981	2953042	Yes	2952872	2952965
AT1G09170		non-targets	chr1	-	1	2956251-2956321	2956383	Yes	2956257	2956320
AT1G09176		non-targets	chr1	+	1	2964680-2964696	2964695	NA	NA	2964695
AT1G09195		non-targets	chr1	-	1	2967939-2968030	2968031	Yes	2967940	2967939
AT1G09200	H3.1	non-targets	chr1	-	1	2971538-2971672	2971678	Yes	2971631	2971627
AT1G09210	AtCRT1b|CRT1b	stringent	chr1	-	3	2972555-2972621, 2972660-2972772, 2972911-2973078	2972620, 2972771, 2973052	No	2973033	2973033
AT1G09230		non-targets	chr1	-	1	2979486-2979534	2979517	Yes	2979518	2979497
AT1G09250	AIF4	non-targets	chr1	+	1	2990226-2990393	2990338	Yes	2990291	2990287
AT1G09270	IMPA-4	permissive	chr1	+	1	2998068-2998223	2998217	No	2998144	2998144
AT1G09290		permissive	chr1	-	1	3001496-3001529	3001547	Yes	3001528	3001516
AT1G09300		permissive	chr1	+	1	3008209-3008356	3008365	Yes	3008355	3008229
AT1G09320		non-targets	chr1	-	1	3009943-3010028	3010027	NA	3009943	NA
AT1G09330	ECH	stringent	chr1	-	1	3012743-3012858	3012835	Yes	3012822	3012761
AT1G09390		non-targets	chr1	+	1	3033525-3033598	3033591	Yes	3033537	3033584
AT1G09430	ACLA-3	stringent	chr1	+	1	3045196-3045325	3045237	No	3045218	3045218
AT1G09460		non-targets	chr1	+	1	3055235-3055388	3055430	Yes	3055280	3055387
AT1G09467		NA	chr1	-	2	27984653-27984798, 27984903-27985019	27984813, 27985001	NA	NA	NA
AT1G09480		non-targets	chr1	+	1	3060716-3060807	3060754	Yes	3060733	3060753
AT1G09490		non-targets	chr1	+	1	3065882-3065961	3065948	Yes	3065948	3065887
AT1G09520		non-targets	chr1	-	1	3070872-3071070	3071049	Yes	3070939	3071049
AT1G09530	PAP3|PIF3|POC1	non-targets	chr1	+	1	3079434-3079463	3079462	NA	NA	3079462
AT1G09533|AT1G75163|AT1G75166		NA	chr1	+	1	28212356-28212716	28212451	NA	NA	NA
AT1G09540	ATMYB61|MYB61	non-targets	chr1	+	1	3087769-3088027	3087973	No	3087871	3087871
AT1G09560	GLP5|PDGLP1	non-targets	chr1	+	1	3094744-3094908	3094899	No	3094822	3094822
AT1G09570	FHY2|FRE1|HY8|PHYA	stringent	chr1	-	2	3095210-3095366, 3100145-3100153	3095357, 3100152	Yes	3095255	3095317
AT1G09575		non-targets	chr1	-	1	3101596-3101674	3101729	Yes	3101643	3101664
AT1G09580		permissive	chr1	+	1	3106218-3106294	3106352	No	3106288	3106288
AT1G09590		stringent	chr1	+	1	3107696-3107813	3107802	No	3107751	3107751
AT1G09620		permissive	chr1	-	1	3112795-3112893	3112890	Yes	3112795	3112853
AT1G09630	ATRAB-A2A|ATRAB11C|ATRABA2A|RAB-A2A|RAB11c	non-targets	chr1	-	1	3118157-3118251	3118242	No	3118219	3118219
AT1G09640		stringent	chr1	+	1	3122349-3122708	3122450	No	3122423	3122423
AT1G09645		permissive	chr1	+	1	3124452-3124819	3124646	Yes	3124574	3124587
AT1G09660		permissive	chr1	-	1	3127770-3127841	3127793	Yes	3127780	3127770
at1g09687		NA	chr1	+	1	28889568-28889612	28889602	NA	NA	NA
AT1G09690		stringent	chr1	-	1	3136168-3136321	3136329	No	3136267	3136267
AT1G09700	DRB1|HYL1	non-targets	chr1	-	1	3137815-3137834	3137833	NA	NA	3137815
AT1G09710		non-targets	chr1	+	1	3144365-3144370	3144369	Yes	3144369	3144365
AT1G09730		non-targets	chr1	-	1	3147611-3147796	3147945	No	3147790	3147790
AT1G09740		stringent	chr1	+	1	3156197-3156322	3156341	Yes	3156278	3156272
AT1G09750		non-targets	chr1	+	1	3159112-3159145	3159121	Yes	3159117	3159119
AT1G09760	U2A'	stringent	chr1	-	1	3159112-3159213	3159144	No	3159143	3159143
AT1G09770	ATCDC5|ATMYBCDC5|CDC5	permissive	chr1	+	2	3162972-3162989, 3165231-3165326	3162987, 3165359	Yes	3165322	3165280
AT1G09780	iPGAM1	stringent	chr1	-	1	3165369-3165420	3165373	No	3165371	3165371
AT1G09787		NA	chr1	+	1	29422340-29422358	29422357	NA	NA	NA
AT1G09794		non-targets	chr1	+	1	3173418-3173501	3173565	No	3173492	3173492
AT1G09795	ATATP-PRT2|ATP-PRT2|HISN1B	non-targets	chr1	+	1	3176824-3176898	3176910	Yes	3176867	3176868
AT1G09797		NA	chr1	+	1	29428250-29428252	29428250	NA	NA	NA
AT1G09812		non-targets	chr1	+	1	3188690-3188822	3188821	Yes	3188821	3188706
AT1G09815	POLD4	non-targets	chr1	+	1	3190190-3190289	3190268	No	3190241	3190241
AT1G09830	PUR2	permissive	chr1	-	1	3192654-3192733	3192706	Yes	3192654	3192682
AT1G09840	AtHIR1|ATSK41|HIR1|SK41	permissive	chr1	-	1	3195828-3195932	3195963	Yes	3195872	3195930
AT1G09850	XBCP3	permissive	chr1	+	1	3204030-3204148	3204127	Yes	3204065	3204122
AT1G09870		permissive	chr1	+	1	3208573-3208748	3208591	No	3208590	3208590
AT1G09910		non-targets	chr1	-	1	3224153-3224220	3224219	NA	NA	3224153
AT1G09913		NA	chr1	+	1	29998382-29998644	29998464	NA	NA	NA
AT1G09920		NA	chr1	-	1	3224631-3224739	3224689	NA	NA	NA
AT1G09932		non-targets	chr1	-	2	3230464-3230494, 3230500-3230577	3230493, 3230500	Yes	3230500	3230464
AT1G09940	HEMA2	non-targets	chr1	-	1	3236932-3237050	3237017	Yes	3236994	3236995
AT1G09950	RAS1	non-targets	chr1	-	1	3240465-3240712	3240731	No	3240625	3240625
AT1G09960	ATSUC4|ATSUT4|SUC4|SUT4	non-targets	chr1	+	1	3247169-3247241	3247224	No	3247197	3247197
AT1G09970	LRR XI-23|RLK7	non-targets	chr1	+	1	3255594-3255790	3255675	No	3255642	3255642
AT1G09980		non-targets	chr1	-	1	3256167-3256393	3256430	Yes	3256298	3256167
AT1G09995		non-targets	chr1	-	2	3262241-3262314, 3262477-3262478	3262313, 3262477	Yes	3262264	3262241
AT1G10020		non-targets	chr1	-	1	3269532-3269717	3269748	Yes	3269615	3269532
AT1G10030	ERG28	permissive	chr1	+	1	3275777-3275954	3275835	No	3275816	3275816
AT1G10050		non-targets	chr1	+	1	3283474-3283648	3283643	Yes	3283615	3283516
AT1G10090		non-targets	chr1	-	1	3290186-3290373	3290404	Yes	3290265	3290326
AT1G10095		non-targets	chr1	-	1	3297250-3297292	3297291	NA	3297250	NA
AT1G10120		non-targets	chr1	-	1	3304039-3304111	3304041	No	3304041	3304041
AT1G10130	ATECA3|ECA3	permissive	chr1	+	1	3322146-3322330	3322247	Yes	3322212	3322184
AT1G10140		non-targets	chr1	-	1	3322536-3322928	3323115	No	3322857	3322857
AT1G10150		non-targets	chr1	+	1	3327542-3327640	3327645	No	3327602	3327602
AT1G10170	ATNFXL1|NFXL1	non-targets	chr1	-	1	3333504-3333689	3333700	No	3333602	3333602
AT1G10180		permissive	chr1	-	1	3338295-3338384	3338306	Yes	3338306	3338312
AT1G10200	WLIM1	NA	chr1	-	1	3346247-3346473	3346430	NA	NA	NA
AT1G10210	ATMPK1|MPK1	non-targets	chr1	+	1	3350997-3351184	3351120	Yes	3351077	3351054
AT1G10230	ASK18|SK18	non-targets	chr1	+	1	3356251-3356422	3356458	Yes	3356325	3356421
AT1G10270	GRP23	non-targets	chr1	+	1	3366473-3366497	3366496	Yes	3366496	3366495
AT1G10280		non-targets	chr1	-	1	3366492-3366550	3366549	NA	NA	3366492
AT1G10290	ADL6|DRP2A	permissive	chr1	+	1	3377283-3377468	3377350	Yes	3377290	3377350
AT1G10310		permissive	chr1	-	1	3381486-3381615	3381705	Yes	3381602	3381511
AT1G10320		non-targets	chr1	-	1	3384064-3384163	3384162	Yes	3384065	3384064
AT1G10350		non-targets	chr1	-	1	3393073-3393456	3393478	No	3393425	3393425
AT1G10360	ATGSTU18|GST29|GSTU18	non-targets	chr1	-	1	3395549-3395600	3395612	Yes	3395573	3395574
AT1G10370	ATGSTU17|ERD9|GST30|GST30B|GSTU17	non-targets	chr1	-	1	3397004-3397131	3397145	No	3397084	3397084
AT1G10380		non-targets	chr1	+	1	3402220-3402386	3402274	Yes	3402257	3402256
AT1G10390		non-targets	chr1	-	1	3407023-3407051	3407061	No	3407023	3407023
AT1G10410		permissive	chr1	-	2	3416555-3416797, 3419573-3419594	3416740, 3419573	No	3416699	3416699
AT1G10430	PP2A-2	permissive	chr1	-	1	3428474-3428556	3428517	Yes	3428499	3428477
AT1G10450	SNL6	non-targets	chr1	+	1	3438330-3438334	3438333	Yes	3438332	3438333
AT1G10470	ARR4|ATRR1|IBC7|MEE7	non-targets	chr1	-	1	3442370-3442526	3442580	Yes	3442500	3442501
AT1G10480	ZFP5	non-targets	chr1	+	1	3450515-3450753	3450601	Yes	3450587	3450543
AT1G10500	ATCPISCA|CPISCA	NA	chr1	-	1	3459958-3460068	3460005	NA	NA	NA
AT1G10510	emb2004	permissive	chr1	+	1	3465705-3465746	3465746	No	3465745	3465745
AT1G10522	PRIN2	permissive	chr1	+	1	3469756-3469849	3469872	No	3469838	3469838
AT1G10530		non-targets	chr1	-	1	3471359-3471528	3471535	Yes	3471376	3471455
AT1G10560	ATPUB18|PUB18	non-targets	chr1	+	1	3486895-3486958	3486956	No	3486956	3486956
AT1G10570	OTS2|ULP1C	non-targets	chr1	+	1	3491164-3491303	3491321	Yes	3491292	3491214
AT1G10580		permissive	chr1	-	1	3491242-3491344	3491361	No	3491280	3491280
AT1G10590		stringent	chr1	-	1	3501960-3502129	3502275	Yes	3502115	3502120
AT1G10600	AMSH2	permissive	chr1	+	1	3505490-3505548	3505547	No	3505547	3505547
AT1G10630	ARFA1F|ATARFA1F	stringent	chr1	-	1	3512762-3513033	3513100	No	3512940	3512940
AT1G10650		non-targets	chr1	-	1	3523864-3524082	3524095	Yes	3524037	3524017
AT1G10660		non-targets	chr1	+	1	3535072-3535129	3535176	No	3535127	3535127
AT1G10670	ACLA-1	stringent	chr1	+	1	3538202-3538367	3538327	No	3538269	3538269
AT1G10682		NA	chr1	-	1	3544893-3545051	3545069	NA	NA	NA
AT1G10690		non-targets	chr1	-	1	3549891-3550027	3550039	Yes	3549960	3549970
AT1G10700	PRS3	non-targets	chr1	+	1	3556470-3556546	3556544	Yes	3556539	3556475
AT1G10720		non-targets	chr1	+	1	3564622-3564754	3564714	Yes	3564681	3564713
AT1G10730	AP1M1	non-targets	chr1	+	1	3567964-3568042	3568089	Yes	3568041	3568012
AT1G10740		non-targets	chr1	-	1	3568166-3568251	3568170	No	3568169	3568169
AT1G10760	GWD|GWD1|SEX1|SOP|SOP1	permissive	chr1	-	1	3581027-3581111	3581110	Yes	3581066	3581027
AT1G10810		non-targets	chr1	+	1	3600817-3600888	3600926	No	3600876	3600876
AT1G10820		non-targets	chr1	-	1	3600877-3601018	3600891	Yes	3601003	3600877
AT1G10830	Z-ISO|Z-ISO1.1|Z-ISO1.2	permissive	chr1	-	1	3605576-3605651	3605674	Yes	3605610	3605589
AT1G10840	TIF3H1	stringent	chr1	-	1	3607630-3607754	3607762	No	3607696	3607696
AT1G10850		non-targets	chr1	+	1	3614506-3614539	3614538	NA	3614538	NA
AT1G10865		stringent	chr1	-	1	3614511-3614597	3614589	Yes	3614512	3614517
AT1G10870	AGD4	permissive	chr1	-	1	3616581-3616685	3616640	Yes	3616593	3616591
AT1G10890		non-targets	chr1	+	2	3628346-3628349, 3630689-3630769	3628348, 3630818	No	3630754	3630754
AT1G10900		permissive	chr1	-	1	3632227-3632311	3632343	Yes	3632280	3632262
AT1G10930	ATRECQ4A|ATSGS1|RECQ4A	non-targets	chr1	-	1	3647918-3647919	3647918	NA	3647918	NA
AT1G10940	ASK1|SNRK2-4|SNRK2.4|SRK2A	non-targets	chr1	-	1	3655741-3655888	3655853	Yes	3655798	3655797
AT1G10950	AtTMN1|EMP12|TMN1	stringent	chr1	+	1	3663823-3664062	3663853	No	3663851	3663851
AT1G10960	ATFD1|FD1	non-targets	chr1	+	1	3664971-3665086	3665084	No	3665039	3665039
AT1G10990		non-targets	chr1	-	1	3670283-3670316	3670320	Yes	3670283	3670285
AT1G11000	ATMLO4|MLO4	non-targets	chr1	-	1	3671758-3671889	3671840	Yes	3671839	3671797
AT1G11020		non-targets	chr1	+	1	3678457-3678543	3678545	Yes	3678511	3678542
AT1G11050		non-targets	chr1	+	1	3684159-3684230	3684229	NA	3684229	NA
AT1G11060		non-targets	chr1	+	1	3689827-3689887	3689843	Yes	3689843	3689830
AT1G11100		non-targets	chr1	-	1	3703688-3703780	3703693	Yes	3703688	3703691
AT1G11120		non-targets	chr1	+	1	3717592-3717705	3717704	Yes	3717704	3717592
AT1G11160		non-targets	chr1	+	1	3739721-3739726	3739725	NA	3739725	NA
AT1G11170		non-targets	chr1	+	1	3744668-3744674	3744673	Yes	3744673	3744669
AT1G11180	AtSCAMP2|SCAMP2	non-targets	chr1	+	1	3748480-3748539	3748538	NA	3748538	NA
AT1G11185		NA	chr1	+	1	3749917-3750117	3750036	NA	NA	NA
AT1G11190	BFN1|ENDO1	non-targets	chr1	-	2	3750066-3750154, 3752044-3752045	3750163, 3752044	No	3750145	3750145
AT1G11200		permissive	chr1	+	1	3755588-3755695	3755680	Yes	3755637	3755657
AT1G11210		non-targets	chr1	-	1	3755705-3755774	3755773	NA	3755705	NA
AT1G11240		permissive	chr1	-	1	3766742-3766797	3766777	Yes	3766753	3766765
AT1G11260	ATSTP1|STP1	non-targets	chr1	+	2	3777692-3777696, 3780218-3780345	3777695, 3780322	No	3780270	3780270
AT1G11280		non-targets	chr1	-	1	3787367-3787375	3787374	NA	3787367	NA
AT1G11310	ATMLO2|MLO2|PMR2	permissive	chr1	-	1	3800740-3800853	3800796	No	3800769	3800769
AT1G11320		non-targets	chr1	+	1	3808873-3808875	3808874	NA	3808874	NA
AT1G11360		non-targets	chr1	-	1	3821417-3821580	3821591	No	3821493	3821493
AT1G11380		non-targets	chr1	+	1	3834163-3834418	3834389	Yes	3834362	3834211
AT1G11390		permissive	chr1	-	1	3834429-3834528	3834447	Yes	3834441	3834443
AT1G11400	PYM	permissive	chr1	+	1	3840134-3840267	3840260	No	3840201	3840201
AT1G11410		non-targets	chr1	+	1	3844432-3844433	3844432	No	3844432	3844432
AT1G11430	MORF9	stringent	chr1	+	1	3849093-3849149	3849094	Yes	3849093	3849095
AT1G11440		non-targets	chr1	+	1	3850661-3850714	3850713	Yes	3850661	3850713
AT1G11450	UMAMIT27	non-targets	chr1	+	1	3855349-3855438	3855434	Yes	3855349	3855437
AT1G11475	NRPB10|NRPD10|NRPE10	stringent	chr1	+	1	3863943-3864034	3864033	Yes	3864033	3863970
AT1G11480		permissive	chr1	-	1	3864045-3864257	3864322	No	3864170	3864170
AT1G11530	ATCXXS1|CXXS1	non-targets	chr1	+	1	3875424-3875491	3875490	Yes	3875490	3875466
AT1G11540		non-targets	chr1	-	1	3875366-3875471	3875470	No	3875400	3875400
AT1G11545	XTH8	non-targets	chr1	-	2	3878499-3878642, 3879322-3879356	3878641, 3879360	No	3878596	3878596
AT1G11580	ATPMEPCRA|PMEPCRA	permissive	chr1	+	1	3890725-3890857	3890801	No	3890763	3890763
AT1G11592		NA	chr1	-	1	3895161-3895354	3895356	NA	NA	NA
AT1G11630		non-targets	chr1	-	1	3912901-3912925	3912901	Yes	3912921	3912901
AT1G11650	ATRBP45B|RBP45B	stringent	chr1	+	1	3918090-3918229	3918191	No	3918142	3918142
AT1G11660		permissive	chr1	+	1	3924468-3924571	3924499	No	3924486	3924486
AT1G11670		permissive	chr1	-	1	3928068-3928237	3928165	Yes	3928161	3928162
AT1G11680	CYP51|CYP51A2|CYP51G1|EMB1738	permissive	chr1	+	1	3940690-3940788	3940763	Yes	3940732	3940736
AT1G11700		non-targets	chr1	+	1	3946462-3946755	3946754	Yes	3946467	3946754
AT1G11740		non-targets	chr1	-	1	3963041-3963291	3963364	Yes	3963146	3963176
AT1G11750	CLPP6|NCLPP1|NCLPP6	non-targets	chr1	+	1	3969649-3969741	3969780	Yes	3969727	3969705
AT1G11760	MED32	non-targets	chr1	-	1	3971991-3972141	3972156	No	3972074	3972074
AT1G11780		non-targets	chr1	-	1	3977348-3977426	3977425	NA	3977348	NA
AT1G11790	ADT1|AtADT1	permissive	chr1	+	1	3985151-3985217	3985263	No	3985214	3985214
AT1G11800		non-targets	chr1	-	1	3985252-3985387	3985386	Yes	3985252	3985374
AT1G11840	ATGLX1|GLX1	stringent	chr1	+	2	3995670-3995703, 3997703-3997875	3995702, 3997803	Yes	3997723	3997783
AT1G11860		stringent	chr1	+	1	4003334-4003489	4003400	Yes	4003390	4003377
AT1G11880		non-targets	chr1	-	2	4007648-4007650, 4007651-4007656	4007649, 4007655	Yes	4007648	4007651
AT1G11890	ATSEC22|SEC22	stringent	chr1	+	1	4013025-4013161	4013052	Yes	4013047	4013039
AT1G11905		non-targets	chr1	+	1	4016431-4016554	4016510	Yes	4016494	4016484
AT1G11910	APA1|ATAPA1	stringent	chr1	-	1	4016688-4016923	4016957	No	4016873	4016873
AT1G11930		permissive	chr1	+	1	4030481-4030540	4030529	Yes	4030538	4030481
AT1G11940		non-targets	chr1	-	1	4031616-4031621	4031620	NA	NA	4031620
AT1G11960		non-targets	chr1	-	1	4039634-4039753	4039778	Yes	4039711	4039710
AT1G12000		stringent	chr1	-	1	4049813-4050048	4050164	No	4049990	4049990
AT1G12010		non-targets	chr1	+	1	4057766-4057869	4057846	Yes	4057846	4057853
AT1G12013|AT1G12015	SNOR111,	NA	chr1	+	1	4058413-4058579	4058578	NA	NA	NA
AT1G12020		non-targets	chr1	-	1	4062461-4062624	4062573	Yes	4062482	4062573
AT1G12040	LRX1	non-targets	chr1	+	1	4072516-4072699	4072740	No	4072680	4072680
AT1G12050	AtFAH|FAH|SSCD1	permissive	chr1	+	1	4076112-4076161	4076166	Yes	4076130	4076159
AT1G12060	ATBAG5|BAG5	non-targets	chr1	+	1	4077113-4077222	4077151	NA	NA	4077151
AT1G12080		non-targets	chr1	+	1	4084974-4085209	4085055	No	4085022	4085022
AT1G12090	ELP	non-targets	chr1	-	1	4089755-4089937	4090010	No	4089890	4089890
AT1G12110	ATNRT1|B-1|CHL1|CHL1-1|NRT1|NRT1.1	non-targets	chr1	+	2	4106773-4106810, 4109454-4109906	4106787, 4109611	No	4109537	4109537
AT1G12120		permissive	chr1	-	1	4114642-4114844	4114872	Yes	4114790	4114770
AT1G12140	FMO GS-OX5	non-targets	chr1	+	1	4123457-4123544	4123626	No	4123543	4123543
AT1G12160		permissive	chr1	+	1	4128203-4128345	4128356	Yes	4128250	4128344
AT1G12200	FMO	permissive	chr1	+	1	4139977-4140049	4140048	NA	NA	4140048
AT1G12210	RFL1	non-targets	chr1	+	1	4140617-4140736	4140696	Yes	4140693	4140651
AT1G12230		stringent	chr1	+	1	4150874-4151064	4150926	Yes	4150894	4150920
AT1G12240	ATBETAFRUCT4|AtFRUCT4|AtVI2|FRUCT4|VAC-INV|VI2	permissive	chr1	+	1	4157531-4157649	4157635	No	4157608	4157608
AT1G12244		non-targets	chr1	+	1	4158984-4158987	4158986	NA	4158986	NA
AT1G12260	ANAC007|EMB2749|NAC007|VND4	non-targets	chr1	-	1	4162778-4162954	4162805	Yes	4162817	4162778
AT1G12270	Hop1	stringent	chr1	+	1	4174727-4174777	4174784	Yes	4174776	4174736
AT1G12310		stringent	chr1	-	1	4187064-4187346	4187524	No	4187316	4187316
AT1G12320		non-targets	chr1	+	1	4190303-4190342	4190341	NA	4190341	NA
AT1G12340		NA	chr1	+	1	4198081-4198337	4198411	NA	NA	NA
AT1G12350	ATCOAB|COAB	non-targets	chr1	+	1	4200738-4200855	4200765	Yes	4200746	4200801
AT1G12360	KEU|SEC11	stringent	chr1	+	1	4206282-4206420	4206310	No	4206307	4206307
AT1G12370	PHR1|UVR2	non-targets	chr1	-	1	4206414-4206421	4206414	No	4206414	4206414
AT1G12380		non-targets	chr1	-	1	4214287-4214288	4214287	NA	NA	4214287
AT1G12390		permissive	chr1	+	1	4221666-4221792	4221851	No	4221773	4221773
AT1G12400		permissive	chr1	+	1	4222782-4222897	4222829	No	4222827	4222827
AT1G12410	CLP2|CLPR2|EMB3146|NCLPP2	stringent	chr1	+	1	4225013-4225177	4225145	Yes	4225137	4225041
AT1G12420	ACR8	non-targets	chr1	-	1	4226242-4226460	4226444	Yes	4226376	4226361
AT1G12440		non-targets	chr1	-	1	4241546-4241658	4241635	No	4241610	4241610
AT1G12450		non-targets	chr1	+	1	4245951-4246020	4246019	Yes	4245991	4245990
AT1G12470		stringent	chr1	+	1	4257324-4257448	4257406	No	4257381	4257381
AT1G12500		non-targets	chr1	-	1	4263149-4263328	4263326	No	4263265	4263265
AT1G12520	ATCCS|CCS	permissive	chr1	-	1	4267062-4267231	4267228	No	4267159	4267159
AT1G12530	MOS9	non-targets	chr1	-	1	4268984-4269048	4269023	Yes	4269014	4268986
AT1G12550	HPR3	non-targets	chr1	+	1	4275930-4275985	4275982	No	4275978	4275978
AT1G12560	ATEXP7|ATEXPA7|ATHEXP ALPHA 1.26|EXP7|EXPA7	non-targets	chr1	+	1	4277840-4277998	4277930	No	4277885	4277885
AT1G12580	PEPKR1	non-targets	chr1	+	1	4285760-4285860	4285896	No	4285830	4285830
AT1G12610	DDF1	non-targets	chr1	-	1	4289886-4290016	4289931	Yes	4289931	4289914
AT1G12630		NA	chr1	+	1	4299610-4299747	4299746	NA	NA	NA
AT1G12640	AtLPLAT1|LPCAT1|LPLAT1	permissive	chr1	-	1	4303242-4303443	4303444	Yes	4303340	4303311
AT1G12650		permissive	chr1	+	2	4307321-4307327, 4307822-4308012	4307326, 4308057	Yes	4307844	4308011
AT1G12680	PEPKR2	non-targets	chr1	-	1	4319899-4319933	4319948	Yes	4319910	4319926
AT1G12710	AtPP2-A12|PP2-A12	non-targets	chr1	-	1	4326745-4326817	4326868	Yes	4326745	4326799
AT1G12730		non-targets	chr1	+	1	4337843-4337846	4337843	Yes	4337843	4337844
AT1G12740	CYP87A2	non-targets	chr1	+	1	4344689-4344889	4344946	Yes	4344832	4344888
AT1G12750	ATRBL6|RBL6	non-targets	chr1	-	2	4344940-4345013, 4347951-4348065	4345012, 4348064	Yes	4344940	4347951
AT1G12760		stringent	chr1	+	1	4350700-4350933	4350770	Yes	4350754	4350729
AT1G12770	EMB1586|ISE1	non-targets	chr1	+	1	4353603-4353674	4353675	Yes	4353636	4353673
AT1G12780	ATUGE1|UGE1	non-targets	chr1	-	1	4355923-4356002	4355973	No	4355969	4355969
AT1G12790		non-targets	chr1	-	1	4359227-4359296	4359295	NA	4359227	NA
AT1G12810		non-targets	chr1	+	1	4368726-4368829	4368860	Yes	4368805	4368803
AT1G12820	AFB3	non-targets	chr1	-	1	4368793-4368813	4368811	No	4368811	4368811
AT1G12830		NA	chr1	-	1	4374245-4374300	4374252	NA	NA	NA
AT1G12840	ATVHA-C|DET3	stringent	chr1	+	1	4378436-4378556	4378480	No	4378459	4378459
AT1G12845		non-targets	chr1	-	1	4378852-4378958	4378942	No	4378886	4378886
AT1G12880	atnudt12|NUDT12	non-targets	chr1	+	1	4391130-4391151	4391150	No	4391150	4391150
AT1G12910	ATAN11|LWD1	non-targets	chr1	-	1	4394883-4394987	4395042	Yes	4394969	4394967
AT1G12920	ERF1-2	stringent	chr1	-	1	4396339-4396384	4396380	No	4396360	4396360
AT1G12930		permissive	chr1	-	1	4398338-4398436	4398435	Yes	4398338	4398392
AT1G12950	RSH2	non-targets	chr1	+	1	4422552-4422681	4422724	Yes	4422639	4422637
AT1G12970	PIRL3	permissive	chr1	+	1	4425709-4425912	4425915	Yes	4425809	4425911
AT1G12990		non-targets	chr1	+	1	4435977-4436079	4436099	Yes	4436069	4436029
AT1G13000		non-targets	chr1	-	1	4436112-4436284	4436225	Yes	4436112	4436216
AT1G13020	EIF4B2	non-targets	chr1	-	1	4440537-4440650	4440627	Yes	4440574	4440586
AT1G13060	PBE1	stringent	chr1	+	1	4454768-4454856	4454839	No	4454819	4454819
AT1G13090	CYP71B28	non-targets	chr1	+	1	4463467-4463520	4463519	NA	4463519	NA
AT1G13100	CYP71B29	non-targets	chr1	+	1	4465630-4465643	4465642	NA	4465642	NA
AT1G13110	CYP71B7	non-targets	chr1	+	1	4468941-4468982	4468990	No	4468973	4468973
AT1G13120	AtGLE1|GLE1	non-targets	chr1	-	1	4469160-4469315	4469312	Yes	4469229	4469231
AT1G13160		permissive	chr1	+	1	4488498-4488619	4488620	Yes	4488576	4488618
AT1G13170	ORP1D	non-targets	chr1	-	1	4488626-4488695	4488656	Yes	4488649	4488651
AT1G13180	ARP3|ATARP3|DIS1	non-targets	chr1	+	1	4498327-4498471	4498475	Yes	4498435	4498438
AT1G13190		non-targets	chr1	+	2	4499304-4499377, 4501485-4501568	4499398, 4501574	No	4501549	4501549
AT1G13195		non-targets	chr1	-	1	4501510-4501690	4501730	No	4501656	4501656
AT1G13210	ACA.l	non-targets	chr1	-	1	4508973-4509083	4509039	No	4509014	4509014
AT1G13245	DVL4|RTFL17	non-targets	chr1	-	1	4525466-4525566	4525512	Yes	4525496	4525486
AT1G13250	GATL3	non-targets	chr1	-	1	4528624-4528684	4528683	NA	NA	4528624
AT1G13260	EDF4|RAV1	non-targets	chr1	+	1	4543545-4543785	4543625	No	4543597	4543597
AT1G13280	AOC4	non-targets	chr1	+	1	4548647-4548927	4548664	Yes	4548664	4548648
AT1G13300	HRS1	non-targets	chr1	+	2	4557234-4557236, 4558627-4558788	4557235, 4558710	No	4558707	4558707
AT1G13320	PP2AA3	permissive	chr1	-	1	4563419-4563576	4563644	Yes	4563524	4563541
AT1G13330	AHP2	non-targets	chr1	+	1	4570567-4570590	4570589	NA	NA	4570589
AT1G13340		non-targets	chr1	-	1	4569416-4569496	4569452	Yes	4569446	4569449
AT1G13350		non-targets	chr1	-	2	4572337-4572475, 4575165-4575232	4572542, 4575231	Yes	4572337	4572405
AT1G13360		non-targets	chr1	-	1	4576870-4577031	4577071	Yes	4576966	4576982
AT1G13380		non-targets	chr1	-	1	4588950-4589129	4589176	Yes	4589070	4589092
AT1G13390		non-targets	chr1	-	2	4592323-4592525, 4593824-4593839	4592568, 4593838	Yes	4592435	4592496
AT1G13420	ATST4B|ST4B	non-targets	chr1	+	1	4605972-4606129	4606115	No	4606051	4606051
AT1G13430	ATST4C|ST4C	non-targets	chr1	+	1	4607662-4607852	4607826	No	4607745	4607745
AT1G13440	GAPC-2|GAPC2	stringent	chr1	-	1	4608135-4608305	4608354	No	4608249	4608249
AT1G13450	GT-1	permissive	chr1	-	1	4612729-4612846	4612785	No	4612756	4612756
AT1G13460		non-targets	chr1	+	1	4618236-4618347	4618352	Yes	4618307	4618306
AT1G13560	AAPT1|ATAAPT1	stringent	chr1	-	1	4638487-4638699	4638660	Yes	4638660	4638618
AT1G13570		non-targets	chr1	-	1	4642295-4642426	4642425	Yes	4642345	4642346
AT1G13580	LAG13|LOH3	permissive	chr1	-	1	4644556-4644791	4644829	Yes	4644711	4644676
AT1G13590	ATPSK1|PSK1	permissive	chr1	+	2	4648672-4648815, 4648900-4649064	4648796, 4648961	No	4648739	4648739
AT1G13600	AtbZIP58|bZIP58	non-targets	chr1	-	1	4650649-4650720	4650719	NA	4650649	NA
AT1G13640		permissive	chr1	-	1	4677005-4677135	4677155	Yes	4677026	4677134
AT1G13670		non-targets	chr1	+	1	4688904-4689265	4689042	Yes	4688981	4688971
AT1G13690	ATE1	permissive	chr1	+	1	4694312-4694482	4694390	Yes	4694352	4694448
AT1G13730		permissive	chr1	+	1	4712500-4712610	4712609	Yes	4712599	4712609
AT1G13740	AFP2	non-targets	chr1	+	1	4715349-4715368	4715367	Yes	4715364	4715367
AT1G13750		non-targets	chr1	-	1	4715326-4715415	4715394	Yes	4715394	4715342
AT1G13770	RUS3	non-targets	chr1	+	1	4724493-4724510	4724509	NA	NA	4724509
AT1G13780		non-targets	chr1	+	1	4726473-4726476	4726475	NA	4726475	NA
AT1G13810		permissive	chr1	+	1	4735368-4735390	4735389	Yes	4735368	4735389
AT1G13870	AtKTI12|DRL1	non-targets	chr1	-	1	4747151-4747338	4747390	Yes	4747261	4747283
AT1G13880		non-targets	chr1	+	1	4751146-4751241	4751271	No	4751210	4751210
AT1G13900	PAP2	non-targets	chr1	-	1	4753095-4753221	4753278	Yes	4753129	4753143
AT1G13930		non-targets	chr1	+	1	4761670-4761846	4761762	No	4761716	4761716
AT1G13950	ATELF5A-1|EIF-5A|EIF5A|ELF5A-1	non-targets	chr1	+	1	4774773-4774926	4774831	No	4774808	4774808
AT1G13960	WRKY4	non-targets	chr1	+	1	4779200-4779426	4779393	Yes	4779277	4779374
AT1G13970		non-targets	chr1	-	1	4779479-4779583	4779581	Yes	4779529	4779530
AT1G13980	EMB30|GN|VAN7	permissive	chr1	+	1	4794473-4794654	4794566	Yes	4794549	4794519
AT1G13990		non-targets	chr1	+	1	4796527-4796638	4796659	Yes	4796593	4796594
AT1G14010		permissive	chr1	-	1	4800198-4800301	4800348	Yes	4800227	4800278
AT1G14020		permissive	chr1	+	1	4805275-4805421	4805359	Yes	4805326	4805344
AT1G14040		permissive	chr1	+	1	4814652-4814876	4814917	Yes	4814757	4814819
AT1G14060		non-targets	chr1	-	1	4817082-4817196	4817227	Yes	4817082	4817132
AT1G14080	ATFUT6|FUT6	non-targets	chr1	+	1	4824312-4824518	4824524	Yes	4824439	4824411
AT1G14130		non-targets	chr1	-	1	4835811-4835987	4835910	Yes	4835907	4835910
AT1G14140	UCP3	non-targets	chr1	-	1	4837846-4838057	4838106	Yes	4838009	4838023
AT1G14170		non-targets	chr1	-	2	4843180-4843310, 4845422-4845481	4843284, 4845480	No	4843234	4843234
AT1G14200		non-targets	chr1	-	1	4854221-4854431	4854543	Yes	4854346	4854383
AT1G14210		non-targets	chr1	-	1	4856560-4856853	4856939	No	4856783	4856783
AT1G14220		non-targets	chr1	-	1	4858446-4858580	4858468	No	4858447	4858447
AT1G14230		non-targets	chr1	+	2	4861385-4861400, 4864005-4864142	4861399, 4864083	Yes	4864041	4864065
AT1G14240		non-targets	chr1	+	1	4867963-4868003	4867992	No	4867982	4867982
AT1G14280	PKS2	non-targets	chr1	+	1	4878991-4879177	4879056	Yes	4879055	4879056
AT1G14290	SBH2	non-targets	chr1	-	1	4880010-4880139	4880173	Yes	4880059	4880129
AT1G14300		permissive	chr1	-	1	4882335-4882372	4882371	NA	NA	4882335
AT1G14310		non-targets	chr1	+	1	4886744-4886791	4886825	No	4886787	4886787
AT1G14320	RPL10|RPL10A|SAC52	stringent	chr1	+	1	4889540-4889661	4889615	No	4889580	4889580
AT1G14330		non-targets	chr1	-	1	4889942-4890165	4890189	No	4890140	4890140
AT1G14340		permissive	chr1	+	1	4898897-4899099	4899040	Yes	4898997	4899000
AT1G14345		non-targets	chr1	+	1	4899840-4900016	4900015	Yes	4900015	4899842
AT1G14360	ATUTR3|UTR3	non-targets	chr1	-	1	4911116-4911227	4911190	Yes	4911179	4911134
AT1G14380	IQD28	non-targets	chr1	-	1	4918008-4918116	4918138	Yes	4918063	4918051
AT1G14390		non-targets	chr1	+	1	4926913-4926941	4926940	Yes	4926940	4926913
AT1G14400	ATUBC1|UBC1	stringent	chr1	-	1	4926982-4927168	4927264	No	4927132	4927132
AT1G14410	ATWHY1|PTAC1|WHY1	non-targets	chr1	-	1	4929105-4929130	4929129	NA	4929105	NA
AT1G14450		stringent	chr1	-	1	4946182-4946320	4946348	Yes	4946282	4946281
AT1G14460		non-targets	chr1	-	1	4948746-4948761	4948749	Yes	4948747	4948746
AT1G14480		non-targets	chr1	+	1	4957978-4958008	4958007	No	4958007	4958007
AT1G14510	AL7|AtAL7	non-targets	chr1	-	1	4961781-4961969	4961962	Yes	4961893	4961924
AT1G14530	THH1	non-targets	chr1	-	1	4971032-4971208	4971161	No	4971158	4971158
AT1G14540	PER4	non-targets	chr1	-	1	4974034-4974138	4974201	Yes	4974043	4974034
AT1G14560	CoAc1	permissive	chr1	+	1	4983237-4983322	4983247	No	4983247	4983247
AT1G14570	AtPUX7|PUX7	permissive	chr1	+	1	4987305-4987406	4987388	No	4987348	4987348
AT1G14580		non-targets	chr1	+	1	4992639-4992732	4992786	No	4992731	4992731
AT1G14590		non-targets	chr1	-	1	4998807-4998867	4998869	Yes	4998811	4998807
AT1G14610	TWN2|VALRS	stringent	chr1	-	2	5008195-5008343, 5008782-5008783	5008363, 5008782	No	5008315	5008315
AT1G14620	DECOY	permissive	chr1	-	1	5014745-5014830	5014831	Yes	5014756	5014754
AT1G14650		permissive	chr1	+	1	5030765-5030778	5030783	No	5030776	5030776
AT1G14670		permissive	chr1	+	1	5040446-5040573	5040557	No	5040505	5040505
AT1G14685	ATBPC2|BBR/BPC2|BPC2	non-targets	chr1	+	2	5044031-5044353, 5045604-5045610	5044164, 5045609	Yes	5044227	5044075
AT1G14690	MAP65-7	non-targets	chr1	-	1	5051747-5051888	5051943	Yes	5051763	5051846
AT1G14700	ATPAP3|PAP3	non-targets	chr1	+	1	5061055-5061135	5061134	NA	NA	5061134
AT1G14710		permissive	chr1	-	1	5061863-5062056	5062118	Yes	5061965	5061991
AT1G14720	ATXTH28|EXGT-A2|XTH28|XTR2	non-targets	chr1	-	1	5066639-5066696	5066696	Yes	5066639	5066643
AT1G14730		non-targets	chr1	+	1	5074698-5074787	5074734	Yes	5074776	5074734
AT1G14740	TTA1	permissive	chr1	-	1	5075172-5075311	5075364	Yes	5075289	5075236
AT1G14750	SDS	non-targets	chr1	-	1	5079407-5079435	5079434	NA	5079407	NA
AT1G14770		non-targets	chr1	-	1	5086625-5086628	5086627	NA	5086625	NA
AT1G14780		non-targets	chr1	+	1	5093960-5094122	5094121	NA	5094121	NA
AT1G14810		permissive	chr1	-	1	5102479-5102569	5102564	Yes	5102503	5102492
AT1G14820		permissive	chr1	-	1	5105106-5105143	5105135	Yes	5105126	5105117
AT1G14830	ADL1C|ADL5|DL1C|DRP1C	stringent	chr1	-	1	5107353-5107537	5107524	No	5107470	5107470
AT1G14850	NUP155	permissive	chr1	-	1	5116540-5116767	5116699	Yes	5116574	5116571
AT1G14860	atnudt18|NUDT18	non-targets	chr1	+	1	5126078-5126249	5126184	No	5126141	5126141
AT1G14870	AtPCR2|PCR2	non-targets	chr1	-	1	5128269-5128507	5128575	Yes	5128431	5128490
AT1G14890		non-targets	chr1	+	1	5137835-5137961	5137985	Yes	5137895	5137934
AT1G14900	HMGA	non-targets	chr1	-	1	5138331-5138486	5138507	No	5138419	5138419
AT1G14920	GAI|RGA2	non-targets	chr1	+	2	5149341-5149346, 5151144-5151336	5149341, 5151284	Yes	5151284	5151159
AT1G14960		non-targets	chr1	-	1	5159188-5159203	5159203	No	5159198	5159198
AT1G14970		non-targets	chr1	-	1	5161655-5161695	5161694	NA	5161655	NA
AT1G14980	CPN10	stringent	chr1	-	1	5165553-5165799	5165935	No	5165744	5165744
AT1G14990		non-targets	chr1	-	1	5167100-5167213	5167181	Yes	5167151	5167182
AT1G15000	scpl50	non-targets	chr1	+	1	5170011-5170153	5170207	Yes	5170078	5170152
AT1G15010		non-targets	chr1	+	1	5171694-5171862	5171823	Yes	5171741	5171778
AT1G15020	ATQSOX1|QSO2|QSOX1	permissive	chr1	-	1	5172907-5173162	5173303	Yes	5173132	5173135
AT1G15030		non-targets	chr1	+	1	5178977-5179035	5179034	NA	5179034	NA
AT1G15040	GAT|GAT1_2.1	non-targets	chr1	-	1	5179882-5179970	5179903	No	5179895	5179895
AT1G15060		non-targets	chr1	-	1	5183535-5183724	5183716	Yes	5183610	5183654
AT1G15100	RHA2A	non-targets	chr1	-	1	5193375-5193513	5193473	No	5193425	5193425
AT1G15110	PSS1	non-targets	chr1	+	1	5202046-5202214	5202113	No	5202080	5202080
AT1G15120		stringent	chr1	+	1	5204046-5204217	5204175	No	5204111	5204111
AT1G15130		permissive	chr1	-	1	5205983-5206100	5206179	Yes	5206095	5206074
AT1G15140		NA	chr1	-	1	5210094-5210290	5210340	NA	NA	NA
AT1G15170		permissive	chr1	+	1	5222912-5222994	5222994	Yes	5222993	5222914
AT1G15180		non-targets	chr1	+	1	5226646-5226730	5226714	No	5226690	5226690
AT1G15200		non-targets	chr1	-	1	5228328-5228401	5228380	Yes	5228333	5228353
AT1G15210	ABCG35|ATPDR7|PDR7	non-targets	chr1	-	1	5231332-5231497	5231496	No	5231416	5231416
AT1G15215	DTF1|SHH1	non-targets	chr1	+	1	5240009-5240074	5240073	NA	NA	5240073
AT1G15220	ATCCMH|CCMH	non-targets	chr1	-	1	5240048-5240199	5240183	Yes	5240048	5240165
AT1G15230		non-targets	chr1	-	2	5242100-5242351, 5242485-5242535	5242460, 5242534	Yes	5242504	5242527
AT1G15240		non-targets	chr1	+	2	5245206-5245209, 5248662-5248693	5245207, 5248694	No	5245207	5245207
AT1G15250		permissive	chr1	-	1	5248664-5248690	5248664	No	5248664	5248664
AT1G15270		stringent	chr1	-	1	5250546-5250747	5250739	No	5250660	5250660
AT1G15280		non-targets	chr1	+	1	5256649-5256777	5256797	Yes	5256723	5256755
AT1G15310	ATHSRP54A|SRP54-1	permissive	chr1	-	1	5268954-5269040	5269039	NA	5268954	NA
AT1G15340	MBD10	NA	chr1	-	1	5275689-5275747	5275695	NA	NA	NA
AT1G15350		non-targets	chr1	-	1	5278066-5278325	5278514	No	5278290	5278290
AT1G15370		permissive	chr1	+	1	5288500-5288643	5288579	Yes	5288576	5288504
AT1G15380	GLYI4	non-targets	chr1	+	1	5292346-5292471	5292470	Yes	5292466	5292470
AT1G15385		non-targets	chr1	-	1	5292720-5292914	5292939	Yes	5292748	5292722
AT1G15400		permissive	chr1	-	2	5295745-5295797, 5296122-5296315	5295759, 5296409	No	5296273	5296273
AT1G15410		non-targets	chr1	+	1	5300800-5300924	5300934	Yes	5300923	5300905
AT1G15415		non-targets	chr1	-	1	5300742-5300779	5300778	NA	NA	5300742
AT1G15420		non-targets	chr1	-	1	5301557-5301671	5301694	Yes	5301557	5301653
AT1G15430		non-targets	chr1	+	1	5305897-5306103	5306078	Yes	5305985	5306013
AT1G15470		non-targets	chr1	+	1	5317778-5317893	5317902	No	5317859	5317859
AT1G15490		non-targets	chr1	-	1	5320614-5320681	5320681	Yes	5320614	5320615
AT1G15500	ATNTT2	stringent	chr1	+	1	5328785-5328878	5328941	No	5328867	5328867
AT1G15520	ABCG40|ATABCG40|ATPDR12|PDR12	NA	chr1	-	1	5331858-5331934	5331878	NA	NA	NA
AT1G15530		non-targets	chr1	-	1	5339675-5339827	5339784	No	5339769	5339769
AT1G15550	ATGA3OX1|GA3OX1|GA4	non-targets	chr1	-	1	5344439-5344504	5344546	Yes	5344440	5344483
AT1G15570	CYCA2;3	permissive	chr1	+	1	5365490-5365549	5365548	NA	5365548	NA
AT1G15580	ATAUX2-27|AUX2-27|IAA5	NA	chr1	-	1	5365616-5365636	5365635	NA	NA	NA
AT1G15625		non-targets	chr1	+	1	5375783-5375837	5375861	Yes	5375832	5375836
AT1G15640		non-targets	chr1	+	1	5380054-5380141	5380192	Yes	5380138	5380136
AT1G15660	CENP-C	permissive	chr1	+	1	5385253-5385320	5385319	Yes	5385319	5385296
AT1G15670	KMD2	non-targets	chr1	+	1	5391309-5391556	5391436	No	5391378	5391378
AT1G15690	AtAVP1|ATAVP3|AtVHP1;1|AVP-3|AVP1|FUGU5|VHP1	stringent	chr1	+	1	5402333-5402613	5402382	No	5402358	5402358
AT1G15700	ATPC2	non-targets	chr1	-	1	5402556-5402566	5402565	Yes	5402563	5402556
AT1G15710		non-targets	chr1	+	1	5405644-5405868	5405798	No	5405740	5405740
AT1G15720	TRFL5	non-targets	chr1	+	1	5407496-5407516	5407505	Yes	5407505	5407497
AT1G15730		non-targets	chr1	-	1	5407405-5407445	5407444	NA	5407405	NA
AT1G15740		NA	chr1	+	1	5414820-5414864	5414858	NA	NA	NA
AT1G15750	TPL|WSIP1	stringent	chr1	-	1	5414781-5414973	5415053	No	5414932	5414932
AT1G15780	NRB4	non-targets	chr1	-	1	5430182-5430258	5430242	Yes	5430221	5430242
AT1G15800		non-targets	chr1	-	2	5440944-5441151, 5441233-5441240	5441079, 5441239	Yes	5441082	5441079
AT1G15810		permissive	chr1	+	1	5446492-5446580	5446548	No	5446548	5446548
AT1G15820	CP24|LHCB6	NA	chr1	-	1	5446473-5446639	5446597	NA	NA	NA
AT1G15860		permissive	chr1	+	1	5456875-5457024	5456951	No	5456928	5456928
AT1G15880	atgos11|GOS11	stringent	chr1	-	1	5458398-5458622	5458709	Yes	5458586	5458520
AT1G15910	FDM1|IDNL1|IDP1	non-targets	chr1	+	1	5466817-5466818	5466817	NA	5466817	NA
AT1G15920		non-targets	chr1	+	2	5470847-5470862, 5471023-5471076	5470861, 5471075	Yes	5470861	5471075
AT1G15930		stringent	chr1	+	1	5472860-5473054	5472930	No	5472904	5472904
AT1G15940		non-targets	chr1	+	2	5476662-5476664, 5477852-5477857	5476663, 5477856	No	5477856	5477856
AT1G15950	ATCCR1|CCR1|IRX4	stringent	chr1	+	1	5482081-5482203	5482174	No	5482143	5482143
AT1G15970		non-targets	chr1	-	1	5486163-5486429	5486580	Yes	5486323	5486273
AT1G16000		permissive	chr1	+	1	5495277-5495362	5495347	No	5495322	5495322
AT1G16020		permissive	chr1	+	2	5500727-5500730, 5501205-5501367	5500729, 5501356	Yes	5501326	5501240
AT1G16030	Hsp70b	non-targets	chr1	-	1	5502158-5502257	5502230	No	5502205	5502205
AT1G16040		non-targets	chr1	+	1	5506590-5506640	5506644	Yes	5506600	5506639
AT1G16060	ADAP|WRI3	non-targets	chr1	+	1	5511730-5511737	5511739	Yes	5511736	5511734
AT1G16170		permissive	chr1	-	2	5538670-5538799, 5539328-5539429	5538748, 5539353	Yes	5538743	5538719
AT1G16180		stringent	chr1	+	1	5542771-5543000	5542893	No	5542833	5542833
AT1G16190	RAD23A	permissive	chr1	+	1	5546021-5546128	5546102	Yes	5546086	5546102
AT1G16210		permissive	chr1	-	1	5546084-5546210	5546242	No	5546167	5546167
AT1G16240	ATSYP51|SYP51	stringent	chr1	-	1	5554842-5555084	5555038	No	5555017	5555017
AT1G16250		non-targets	chr1	+	1	5558864-5558939	5558892	Yes	5558878	5558879
AT1G16270		non-targets	chr1	+	1	5568341-5568412	5568467	Yes	5568406	5568411
AT1G16280	AtRH36|RH36|SWA3	non-targets	chr1	-	1	5568299-5568313	5568299	NA	NA	5568299
AT1G16300	GAPCP-2	permissive	chr1	+	1	5577511-5577625	5577661	No	5577600	5577600
AT1G16310		non-targets	chr1	+	1	5580666-5580719	5580718	NA	NA	5580718
AT1G16320		non-targets	chr1	+	1	5582005-5582144	5582203	No	5582110	5582110
AT1G16340	ATKDSA2|ATKSDA	permissive	chr1	-	1	5587734-5587812	5587789	Yes	5587752	5587734
AT1G16350		permissive	chr1	+	1	5592983-5593111	5593137	Yes	5593072	5593049
AT1G16360		NA	chr1	-	2	5593300-5593397, 5593410-5593418	5593396, 5593417	NA	NA	NA
AT1G16370	ATOCT6|OCT6	non-targets	chr1	+	1	5598400-5598522	5598491	Yes	5598460	5598457
AT1G16390	ATOCT3|OCT3	non-targets	chr1	+	1	5604509-5604599	5604648	Yes	5604597	5604598
AT1G16430		non-targets	chr1	+	1	5615492-5615511	5615514	No	5615508	5615508
AT1G16440	RSH3	non-targets	chr1	+	2	5616095-5616151, 5617730-5617781	5616150, 5617826	No	5617780	5617780
AT1G16460	ATMST2|ATRDH2|MST2|RDH2|ST2|STR2	stringent	chr1	-	1	5619640-5619698	5619699	Yes	5619663	5619664
AT1G16470	PAB1	permissive	chr1	+	1	5625532-5625682	5625655	No	5625601	5625601
AT1G16510	SAUR41	non-targets	chr1	-	1	5644647-5644700	5644654	Yes	5644652	5644654
AT1G16520		permissive	chr1	+	1	5651143-5651326	5651381	Yes	5651325	5651245
AT1G16540	ABA3|ACI2|ATABA3|AtLOS5|LOS5|SIR3	non-targets	chr1	+	1	5665398-5665484	5665504	No	5665481	5665481
AT1G16560		permissive	chr1	+	1	5670546-5670716	5670638	No	5670597	5670597
AT1G16590	ATREV7|REV7	non-targets	chr1	+	1	5675117-5675153	5675152	Yes	5675123	5675152
AT1G16610	AtSR45|RNPS1|SR45	stringent	chr1	-	1	5675642-5675711	5675693	Yes	5675669	5675668
AT1G16635|AT1G05247		NA	chr1	-	1	5686037-5686110	5686109	NA	NA	NA
AT1G16650		permissive	chr1	+	1	5691238-5691249	5691248	NA	NA	5691248
AT1G16670		non-targets	chr1	+	1	5699704-5699847	5699796	Yes	5699768	5699781
AT1G16680		non-targets	chr1	+	2	5702677-5702687, 5705837-5705864	5702686, 5705863	Yes	5705861	5702686
AT1G16700		stringent	chr1	+	1	5711828-5712030	5711940	No	5711889	5711889
AT1G16710	HAC12	non-targets	chr1	+	1	5722232-5722467	5722428	Yes	5722331	5722466
AT1G16720	HCF173	stringent	chr1	+	1	5726377-5726482	5726481	Yes	5726391	5726481
AT1G16740		permissive	chr1	+	1	5729039-5729128	5729117	No	5729078	5729078
AT1G16780	AtVHP2;2|VHP2;2	permissive	chr1	-	1	5739280-5739302	5739301	No	5739280	5739280
AT1G16790		non-targets	chr1	+	1	5745174-5745214	5745213	Yes	5745206	5745213
AT1G16810		stringent	chr1	+	1	5756788-5756896	5756894	Yes	5756851	5756837
AT1G16825		non-targets	chr1	+	1	5760409-5760479	5760478	Yes	5760478	5760454
AT1G16840		non-targets	chr1	-	1	5762647-5762771	5762770	No	5762719	5762719
AT1G16850		non-targets	chr1	-	1	5764773-5764934	5764854	Yes	5764853	5764807
AT1G16860		permissive	chr1	+	1	5770474-5770654	5770500	No	5770497	5770497
AT1G16870		permissive	chr1	-	1	5770737-5770762	5770782	Yes	5770739	5770760
AT1G16890	AtUBC36|UBC13B|UBC36	stringent	chr1	-	1	5776203-5776398	5776462	No	5776365	5776365
AT1G16900	EBS3	permissive	chr1	-	2	5779019-5779020, 5779021-5779111	5779019, 5779041	Yes	5779019	5779041
AT1G16905		non-targets	chr1	-	1	5782417-5782457	5782454	NA	5782454	NA
AT1G16916		non-targets	chr1	-	1	5786571-5786654	5786658	Yes	5786598	5786571
AT1G16920	ATRABA1B|BEX5|RAB11|RABA1b	stringent	chr1	-	1	5787323-5787374	5787351	No	5787347	5787347
AT1G16930		non-targets	chr1	+	1	5791700-5791822	5791758	No	5791739	5791739
AT1G16970	ATKU70|KU70	permissive	chr1	-	1	5800877-5800985	5800956	Yes	5800962	5800914
AT1G17050	AtSPS2|SPS2	NA	chr1	+	1	5831283-5831372	5831410	NA	NA	NA
AT1G17060	CHI2|CYP72C1|SHK1|SOB7	non-targets	chr1	-	1	5831966-5832175	5832232	No	5832102	5832102
AT1G17080		stringent	chr1	-	1	5840188-5840341	5840381	Yes	5840280	5840289
AT1G17090		non-targets	chr1	-	1	5842177-5842344	5842321	No	5842217	5842217
AT1G17110	UBP15	non-targets	chr1	-	1	5845597-5845735	5845836	Yes	5845699	5845703
AT1G17120	CAT8	permissive	chr1	+	1	5853856-5853964	5854045	No	5853953	5853953
AT1G17130		NA	chr1	+	2	5855777-5855780, 5856555-5856714	5855779, 5856621	NA	NA	NA
AT1G17145		non-targets	chr1	-	1	5860182-5860210	5860197	Yes	5860182	5860190
AT1G17147		non-targets	chr1	-	1	5863399-5863486	5863476	No	5863441	5863441
AT1G17160		non-targets	chr1	+	1	5869256-5869423	5869277	No	5869270	5869270
AT1G17170	ATGSTU24|GST|GSTU24	non-targets	chr1	+	1	5870764-5870895	5870915	No	5870840	5870840
AT1G17180	ATGSTU25|GSTU25	non-targets	chr1	+	1	5873027-5873232	5873133	No	5873084	5873084
AT1G17190	ATGSTU26|GSTU26	non-targets	chr1	+	1	5876445-5876763	5876531	No	5876490	5876490
AT1G17210	ATILP1|ILP1	permissive	chr1	-	1	5880039-5880233	5880368	Yes	5880064	5880061
AT1G17220	FUG1	stringent	chr1	+	1	5890368-5890466	5890523	Yes	5890463	5890465
AT1G17255		NA	chr1	+	1	5903616-5903741	5903740	NA	NA	NA
AT1G17270		non-targets	chr1	-	2	5908841-5908893, 5909223-5909345	5908892, 5909344	Yes	5909223	5908841
AT1G17280	UBC34	NA	chr1	-	1	5916822-5916951	5916914	NA	NA	NA
AT1G17285		non-targets	chr1	+	1	5921208-5921478	5921547	Yes	5921413	5921408
AT1G17290	AlaAT1	stringent	chr1	+	1	5926257-5926446	5926325	No	5926291	5926291
AT1G17300		non-targets	chr1	+	1	5927615-5927756	5927842	No	5927737	5927737
AT1G17310		non-targets	chr1	-	1	5927789-5927878	5927877	Yes	5927861	5927789
AT1G17340		non-targets	chr1	+	1	5938650-5938792	5938723	No	5938691	5938691
AT1G17350		non-targets	chr1	+	1	5944390-5944594	5944480	No	5944444	5944444
AT1G17360		non-targets	chr1	+	1	5951486-5951562	5951608	No	5951547	5951547
AT1G17370	UBP1B	stringent	chr1	-	1	5951577-5951693	5951682	Yes	5951636	5951630
AT1G17380	JAZ5|TIFY11A	non-targets	chr1	-	1	5955445-5955539	5955521	NA	NA	5955521
AT1G17410		non-targets	chr1	-	1	5968424-5968546	5968620	Yes	5968435	5968443
AT1G17420	ATLOX3|LOX3	non-targets	chr1	+	2	5979173-5979176, 5981353-5981489	5979175, 5981553	No	5981477	5981477
AT1G17430		non-targets	chr1	+	1	5983937-5984009	5984001	Yes	5983964	5983979
AT1G17440	CKH1|EER4|TAF12B	permissive	chr1	-	1	5983986-5984137	5983986	Yes	5983986	5984029
AT1G17450		non-targets	chr1	-	1	5988426-5988485	5988484	NA	5988426	NA
AT1G17455	ELF4-L4	permissive	chr1	+	1	5998417-5998559	5998509	No	5998473	5998473
AT1G17470	ATDRG|ATDRG1|DRG1	stringent	chr1	+	1	6006285-6006373	6006391	Yes	6006369	6006329
AT1G17490		non-targets	chr1	+	1	6009218-6009315	6009279	No	6009273	6009273
AT1G17500		non-targets	chr1	+	1	6023497-6023625	6023519	Yes	6023497	6023522
AT1G17510		non-targets	chr1	-	1	6023555-6023600	6023599	No	6023581	6023581
AT1G17520		non-targets	chr1	-	1	6024638-6024798	6024801	Yes	6024638	6024649
AT1G17530	ATTIM23-1|TIM23-1	permissive	chr1	+	1	6028411-6028695	6028477	Yes	6028451	6028449
AT1G17550	AtHAB2|HAB2	non-targets	chr1	+	1	6037223-6037310	6037296	No	6037280	6037280
AT1G17620		non-targets	chr1	+	1	6063218-6063428	6063313	No	6063267	6063267
AT1G17650	GLYR2|GR2	non-targets	chr1	-	1	6069471-6069501	6069522	Yes	6069500	6069471
AT1G17665		non-targets	chr1	-	1	6072240-6072298	6072297	Yes	6072253	6072240
AT1G17690	NOF1	non-targets	chr1	-	1	6082719-6082785	6082784	Yes	6082759	6082784
AT1G17720	ATB BETA	permissive	chr1	-	1	6093297-6093459	6093431	Yes	6093431	6093299
AT1G17730	CHMP1B|VPS46.1	non-targets	chr1	+	1	6100277-6100408	6100327	No	6100305	6100305
AT1G17745	PGDH	non-targets	chr1	+	4	6101833-6102019, 6102521-6102541, 6102830-6102845, 6105155-6105429	6101835, 6102540, 6102844, 6105197	No	6105176	6105176
AT1G17750	AtPEPR2|PEPR2	non-targets	chr1	+	1	6110075-6110132	6110131	Yes	6110131	6110125
AT1G17760	ATCSTF77|CSTF77	permissive	chr1	-	1	6110055-6110131	6110130	Yes	6110106	6110055
AT1G17780		non-targets	chr1	+	1	6125230-6125274	6125269	Yes	6125268	6125260
AT1G17790		non-targets	chr1	-	1	6125337-6125370	6125358	Yes	6125337	6125353
AT1G17860		non-targets	chr1	+	1	6149957-6150049	6150060	No	6150015	6150015
AT1G17880	ATBTF3|BTF3	stringent	chr1	-	1	6152264-6152475	6152454	No	6152430	6152430
AT1G17890	GER2	permissive	chr1	-	1	6154230-6154334	6154276	No	6154266	6154266
AT1G17940		non-targets	chr1	-	1	6169337-6169363	6169347	No	6169343	6169343
AT1G17970		non-targets	chr1	+	1	6187313-6187416	6187452	Yes	6187394	6187389
AT1G17980	PAPS1	non-targets	chr1	-	1	6187509-6187572	6187577	Yes	6187571	6187520
AT1G18030		non-targets	chr1	+	1	6206803-6206834	6206855	Yes	6206833	6206827
AT1G18040	AT;CDCKD;3|CAK2AT|CDKD1;3	permissive	chr1	-	1	6206864-6206897	6206899	Yes	6206867	6206864
AT1G18070		stringent	chr1	-	1	6213724-6213839	6213808	No	6213775	6213775
AT1G18080	ATARCA|RACK1A|RACK1A_AT	stringent	chr1	+	1	6223994-6224229	6224030	No	6224026	6224026
AT1G18100	E12A11|MFT	non-targets	chr1	-	1	6229058-6229132	6229131	NA	6229058	NA
AT1G18140	ATLAC1|LAC1	non-targets	chr1	-	1	6238842-6238915	6238940	Yes	6238843	6238869
AT1G18150	ATMPK8|MPK8	non-targets	chr1	-	1	6244298-6244471	6244418	No	6244401	6244401
AT1G18160		non-targets	chr1	+	1	6253967-6254082	6254136	Yes	6254056	6254047
AT1G18180		non-targets	chr1	+	1	6257861-6257952	6257873	Yes	6257873	6257888
AT1G18210		permissive	chr1	-	1	6267934-6268132	6268208	No	6268073	6268073
AT1G18260	EBS5|HRD3A	NA	chr1	-	1	6278786-6278875	6278894	NA	NA	NA
AT1G18270		permissive	chr1	-	2	6283355-6283483, 6290248-6290250	6283539, 6290248	No	6283473	6283473
AT1G18290		non-targets	chr1	+	1	6298092-6298354	6298367	Yes	6298353	6298107
AT1G18300	atnudt4|NUDT4	non-targets	chr1	+	1	6300983-6301099	6301140	Yes	6301082	6301064
AT1G18330	EPR1|RVE7	non-targets	chr1	-	1	6305866-6306012	6306043	Yes	6305994	6305965
AT1G18335		non-targets	chr1	-	1	6308933-6308979	6308983	Yes	6308972	6308933
AT1G18340		non-targets	chr1	-	1	6311481-6311520	6311518	Yes	6311506	6311505
AT1G18360		non-targets	chr1	-	1	6316746-6316806	6316841	Yes	6316746	6316757
AT1G18390		non-targets	chr1	+	2	6326614-6326625, 6330005-6330082	6326624, 6330081	Yes	6330081	6326624
AT1G18420|AT1G18430		non-targets	chr1	+	1	6345756-6345913	6345909	NA	NA	NA
AT1G18440		non-targets	chr1	+	1	6347756-6347903	6347906	Yes	6347882	6347850
AT1G18450	ARP4|ATARP4	permissive	chr1	+	1	6351881-6352005	6351992	Yes	6351957	6351970
AT1G18460		non-targets	chr1	+	1	6356031-6356132	6356101	No	6356079	6356079
AT1G18470		non-targets	chr1	-	2	6356106-6356204, 6359038-6359041	6356206, 6359040	Yes	6356156	6356132
AT1G18480	AtSLP2|SLP2	non-targets	chr1	+	1	6362980-6363012	6363027	No	6363006	6363006
AT1G18490		non-targets	chr1	+	1	6368711-6368755	6368726	Yes	6368714	6368737
AT1G18500	IPMS1|MAML-4	permissive	chr1	+	2	6369601-6369603, 6373003-6373080	6369602, 6373061	Yes	6373038	6373041
AT1G18540		stringent	chr1	-	1	6377254-6377396	6377408	No	6377331	6377331
AT1G18570	AtMYB51|BW51A|BW51B|HIG1|MYB51	non-targets	chr1	+	1	6391247-6391367	6391374	Yes	6391286	6391346
AT1G18580	GAUT11	non-targets	chr1	+	1	6398136-6398231	6398230	Yes	6398230	6398204
AT1G18600	AtPARL|ATRBL12|PARL|RBL12	permissive	chr1	+	1	6402701-6402806	6402890	Yes	6402799	6402805
AT1G18610		non-targets	chr1	+	1	6409235-6409338	6409397	No	6409337	6409337
AT1G18620	TRM3	non-targets	chr1	+	1	6414306-6414435	6414352	No	6414350	6414350
AT1G18640	PSP|PSP1	permissive	chr1	-	1	6416337-6416453	6416483	No	6416410	6416410
AT1G18660		NA	chr1	+	1	6425767-6425883	6425940	NA	NA	NA
AT1G18680		non-targets	chr1	-	1	6431973-6432008	6431998	Yes	6431979	6431973
AT1G18690	XXT4	non-targets	chr1	+	1	6436918-6436932	6436919	No	6436919	6436919
AT1G18700		permissive	chr1	+	1	6443158-6443291	6443186	Yes	6443186	6443169
AT1G18720		stringent	chr1	-	1	6457753-6457907	6457958	No	6457876	6457876
AT1G18740		non-targets	chr1	+	1	6465417-6465550	6465570	Yes	6465525	6465474
AT1G18745|AT1G05417|AT1G05423		NA	chr1	-	3	6465790-6465834, 6465923-6466095, 6466302-6466327	6465796, 6466093, 6466326	NA	NA	NA
AT1G18773		non-targets	chr1	+	1	6475885-6475914	6475913	Yes	6475913	6475908
AT1G18800	NRP2	permissive	chr1	-	1	6481102-6481266	6481388	Yes	6481102	6481135
AT1G18835	MIF3	non-targets	chr1	-	1	6495839-6495920	6495919	NA	NA	6495839
AT1G18840	IQD30	permissive	chr1	-	1	6500802-6500852	6500855	Yes	6500850	6500808
AT1G18850		permissive	chr1	-	1	6504805-6504809	6504808	Yes	6504807	6504805
AT1G18860	ATWRKY61|WRKY61	non-targets	chr1	+	2	6509918-6509939, 6511305-6511400	6509938, 6511485	Yes	6511399	6511397
AT1G18880	NRT1.9	non-targets	chr1	+	1	6523300-6523384	6523373	Yes	6523367	6523305
AT1G18890	ATCDPK1|AtCPK10|CDPK1|CPK10	non-targets	chr1	-	1	6523257-6523330	6523288	No	6523279	6523279
AT1G18910		permissive	chr1	-	1	6532523-6532585	6532563	Yes	6532560	6532563
AT1G18940		non-targets	chr1	+	1	6545700-6545829	6545828	Yes	6545828	6545755
AT1G18950		non-targets	chr1	+	1	6551955-6552058	6552116	Yes	6552057	6552028
AT1G18980		non-targets	chr1	-	1	6557109-6557285	6557317	No	6557227	6557227
AT1G19000		stringent	chr1	-	1	6560757-6560844	6560827	No	6560799	6560799
AT1G19010		non-targets	chr1	+	1	6567515-6567618	6567523	Yes	6567523	6567515
AT1G19020		non-targets	chr1	+	1	6568486-6568687	6568655	No	6568575	6568575
AT1G19080	PSF3|TTN10	non-targets	chr1	+	1	6586407-6586530	6586529	Yes	6586529	6586481
AT1G19100	AtMORC6|DMS11|MORC6	non-targets	chr1	+	1	6601352-6601370	6601352	NA	NA	6601352
AT1G19110		non-targets	chr1	+	1	6605839-6605987	6605969	No	6605907	6605907
AT1G19115		NA	chr1	+	1	6607885-6607891	6607890	NA	NA	NA
AT1G19130		permissive	chr1	-	1	6609283-6609399	6609362	No	6609324	6609324
AT1G19140		permissive	chr1	-	1	6610742-6610886	6610799	No	6610783	6610783
AT1G19170		non-targets	chr1	+	1	6618927-6619038	6619037	Yes	6619037	6618955
AT1G19180	AtJAZ1|JAZ1|TIFY10A	non-targets	chr1	+	1	6623435-6623683	6623453	No	6623445	6623445
AT1G19190		non-targets	chr1	+	1	6624906-6624989	6625044	No	6624976	6624976
AT1G19200		non-targets	chr1	-	1	6624884-6625076	6625055	No	6624908	6624908
AT1G19210		non-targets	chr1	-	1	6626793-6626874	6626873	No	6626793	6626793
AT1G19220	ARF11|ARF19|IAA22	non-targets	chr1	-	2	6628064-6628228, 6629966-6629997	6628302, 6629966	Yes	6628095	6628064
AT1G19230		non-targets	chr1	+	1	6649300-6649375	6649394	No	6649371	6649371
AT1G19240		permissive	chr1	-	1	6649377-6649432	6649427	No	6649377	6649377
AT1G19270	DA1	non-targets	chr1	+	1	6665976-6666038	6666084	Yes	6666024	6666037
AT1G19310		non-targets	chr1	-	1	6676271-6676315	6676278	No	6676275	6676275
AT1G19350	BES1|BZR2	non-targets	chr1	+	1	6690329-6690411	6690471	Yes	6690410	6690404
AT1G19360	RRA3	permissive	chr1	-	1	6690376-6690536	6690599	Yes	6690496	6690502
AT1G19370		non-targets	chr1	-	1	6692753-6692821	6692859	No	6692806	6692806
AT1G19373		NA	chr1	+	1	6697254-6697300	6697299	NA	NA	NA
AT1G19376		NA	chr1	+	1	6697527-6697542	6697541	NA	NA	NA
AT1G19380		non-targets	chr1	+	1	6698744-6698892	6698918	Yes	6698816	6698891
AT1G19396		non-targets	chr1	+	2	6710392-6710446, 6711773-6711789	6710420, 6711793	Yes	6711786	6710392
AT1G19400		non-targets	chr1	-	1	6711971-6712103	6712117	No	6712056	6712056
AT1G19430		permissive	chr1	-	1	6724384-6724578	6724576	Yes	6724576	6724574
AT1G19440	KCS4	non-targets	chr1	+	2	6729086-6729092, 6730793-6730965	6729091, 6730964	No	6730888	6730888
AT1G19450		permissive	chr1	-	1	6731391-6731548	6731522	No	6731474	6731474
AT1G19480		non-targets	chr1	+	1	6746379-6746553	6746552	Yes	6746552	6746449
AT1G19485		non-targets	chr1	+	1	6751496-6751576	6751575	Yes	6751575	6751572
AT1G19490		non-targets	chr1	-	1	6751554-6751779	6751778	NA	NA	6751554
AT1G19520	NFD5	non-targets	chr1	+	1	6762732-6762860	6762779	Yes	6762776	6762748
AT1G19540		non-targets	chr1	+	1	6767318-6767425	6767424	Yes	6767424	6767321
AT1G19570	ATDHAR1|DHAR1|DHAR5	non-targets	chr1	-	1	6773301-6773398	6773354	No	6773332	6773332
AT1G19580	GAMMA CA1	permissive	chr1	+	1	6777308-6777707	6777437	Yes	6777428	6777324
AT1G19600		permissive	chr1	+	1	6781030-6781133	6781106	Yes	6781071	6781065
AT1G19650		non-targets	chr1	-	1	6796268-6796291	6796290	Yes	6796268	6796279
AT1G19660	AtBBD2|BBD2	stringent	chr1	-	1	6800006-6800009	6800006	Yes	6800007	6800006
AT1G19680		permissive	chr1	+	1	6807804-6807860	6807845	Yes	6807844	6807845
AT1G19690		non-targets	chr1	-	1	6807720-6807763	6807743	No	6807723	6807723
AT1G19700	BEL10|BLH10	non-targets	chr1	-	1	6809691-6809804	6809772	No	6809743	6809743
AT1G19710		non-targets	chr1	+	2	6816713-6816851, 6816902-6816926	6816850, 6816925	Yes	6816925	6816850
AT1G19730	ATH4|ATTRX4	non-targets	chr1	-	1	6822843-6823058	6823067	Yes	6822926	6822925
AT1G19740		non-targets	chr1	+	1	6825397-6825689	6825868	Yes	6825688	6825578
AT1G19770	ATPUP14|PUP14	non-targets	chr1	+	1	6833845-6833948	6833861	Yes	6833861	6833847
AT1G19800	ABCI14|TGD1	non-targets	chr1	+	1	6848033-6848104	6848139	No	6848099	6848099
AT1G19835		non-targets	chr1	-	1	6855939-6856125	6856041	No	6855990	6855990
AT1G19840		non-targets	chr1	-	1	6872220-6872408	6872462	Yes	6872266	6872401
AT1G19860		non-targets	chr1	-	1	6891376-6891445	6891444	NA	6891376	NA
AT1G19870	iqd32	permissive	chr1	-	1	6895013-6895193	6895158	Yes	6895084	6895031
AT1G19880		permissive	chr1	-	1	6900328-6900489	6900451	Yes	6900439	6900440
AT1G19900		non-targets	chr1	-	1	6906897-6906942	6906915	Yes	6906903	6906910
AT1G19910	ATVHA-C2|AVA-2PE|AVA-P2	stringent	chr1	+	1	6914436-6914631	6914639	No	6914539	6914539
AT1G19920	APS2|ASA1	stringent	chr1	-	1	6914606-6914733	6914679	Yes	6914627	6914646
AT1G19940	AtGH9B5|GH9B5	non-targets	chr1	-	1	6918204-6918229	6918228	NA	NA	6918204
AT1G19960		non-targets	chr1	+	1	6928461-6928468	6928467	NA	6928467	NA
AT1G19968		NA	chr1	+	2	6930792-6930795, 6930797-6931042	6930794, 6930866	NA	NA	NA
AT1G19970		non-targets	chr1	-	1	6930971-6931084	6931083	Yes	6931011	6930971
AT1G19980		non-targets	chr1	+	1	6934872-6935002	6935030	No	6935001	6935001
AT1G20010	TUB5	stringent	chr1	-	1	6937736-6937930	6937942	Yes	6937879	6937825
AT1G20015		NA	chr1	+	1	6941204-6941355	6941354	NA	NA	NA
AT1G20030		non-targets	chr1	+	1	6947124-6947163	6947162	Yes	6947134	6947162
AT1G20050	HYD1|MAD4	permissive	chr1	+	1	6950258-6950464	6950315	No	6950294	6950294
AT1G20070		non-targets	chr1	-	1	6957879-6958067	6958141	No	6958024	6958024
AT1G20090	ARAC4|ATRAC4|ATROP2|ROP2	stringent	chr1	+	1	6968860-6968961	6969001	No	6968932	6968932
AT1G20100		non-targets	chr1	-	1	6969144-6969237	6969178	Yes	6969173	6969174
AT1G20110		stringent	chr1	+	1	6974714-6974848	6974767	Yes	6974744	6974741
AT1G20140	ASK4|SK4	non-targets	chr1	+	1	6987205-6987322	6987308	No	6987266	6987266
AT1G20160	ATSBT5.2	non-targets	chr1	-	1	6990720-6990819	6990818	NA	6990720	NA
AT1G20190	ATEXP11|ATEXPA11|ATHEXP ALPHA 1.14|EXP11|EXPA11	non-targets	chr1	-	1	6998288-6998611	6998688	No	6998488	6998488
AT1G20200	EMB2719|HAP15	stringent	chr1	-	1	7000986-7001270	7001252	Yes	7001200	7001222
AT1G20220		stringent	chr1	-	1	7004829-7004954	7004976	Yes	7004917	7004829
AT1G20225		NA	chr1	-	1	7007771-7007850	7007881	NA	NA	NA
AT1G20260	AtVAB3|VAB3	stringent	chr1	+	1	7020480-7020632	7020635	Yes	7020557	7020563
AT1G20270		non-targets	chr1	-	1	7020691-7020765	7020809	Yes	7020751	7020706
AT1G20290		NA	chr1	-	1	7028019-7028034	7028033	NA	NA	NA
AT1G20300		non-targets	chr1	+	1	7031429-7031485	7031469	Yes	7031468	7031469
AT1G20310		non-targets	chr1	+	1	7033170-7033271	7033268	Yes	7033203	7033264
AT1G20330	CVP1|FRL1|SMT2	non-targets	chr1	-	1	7038591-7038886	7038974	Yes	7038814	7038845
AT1G20340	DRT112|PETE2	NA	chr1	-	1	7042521-7042667	7042667	NA	NA	NA
AT1G20370		non-targets	chr1	-	1	7051590-7051627	7051626	Yes	7051590	7051610
AT1G20380		non-targets	chr1	+	1	7065152-7065193	7065207	Yes	7065191	7065192
AT1G20410		permissive	chr1	-	1	7078879-7078937	7078955	No	7078879	7078879
AT1G20430		permissive	chr1	-	1	7083167-7083320	7083316	No	7083273	7083273
AT1G20440	AtCOR47|COR47|RD17	non-targets	chr1	-	1	7084193-7084605	7084831	No	7084550	7084550
AT1G20450	ERD10|LTI29|LTI45	non-targets	chr1	-	1	7087833-7088113	7088209	No	7088067	7088067
AT1G20460		non-targets	chr1	+	1	7093308-7093444	7093525	No	7093422	7093422
AT1G20480		non-targets	chr1	-	1	7094796-7094840	7094839	NA	7094796	NA
AT1G20490		non-targets	chr1	-	1	7097220-7097278	7097294	Yes	7097246	7097229
AT1G20510	OPCL1	non-targets	chr1	-	1	7103368-7103539	7103560	Yes	7103459	7103475
AT1G20540		non-targets	chr1	+	1	7115320-7115417	7115398	Yes	7115360	7115361
AT1G20550		non-targets	chr1	-	2	7115240-7115295, 7115380-7115394	7115240, 7115393	Yes	7115393	7115240
AT1G20560	AAE1	permissive	chr1	-	1	7119651-7119849	7119854	Yes	7119755	7119673
AT1G20575	DPMS1	permissive	chr1	-	1	7126731-7126843	7126817	Yes	7126771	7126773
AT1G20580		permissive	chr1	+	1	7130547-7130790	7130599	Yes	7130576	7130577
AT1G20600		NA	chr1	+	1	7134324-7134450	7134374	NA	NA	NA
AT1G20620	ATCAT3|CAT3|SEN2	stringent	chr1	+	1	7146406-7146426	7146433	Yes	7146425	7146415
AT1G20630	CAT1	permissive	chr1	+	1	7149764-7149871	7149806	Yes	7149778	7149796
AT1G20640		permissive	chr1	+	1	7158201-7158285	7158283	Yes	7158282	7158214
AT1G20650	ASG5	non-targets	chr1	-	1	7158214-7158352	7158322	Yes	7158214	7158243
AT1G20670		non-targets	chr1	-	3	7164060-7164272, 7167170-7167195, 7167810-7167846	7164322, 7167194, 7167827	Yes	7164263	7164126
AT1G20693	HMG BETA 1|HMGB2|NFD02|NFD2	stringent	chr1	+	1	7178683-7178914	7178770	No	7178727	7178727
AT1G20696	HMGB3|NFD03|NFD3	NA	chr1	+	1	7181380-7181561	7181477	NA	NA	NA
AT1G20760		non-targets	chr1	+	1	7214936-7215042	7215015	No	7214988	7214988
AT1G20780	ATPUB44|PUB44|SAUL1	non-targets	chr1	+	1	7220721-7220862	7220792	No	7220765	7220765
AT1G20810		NA	chr1	+	1	7233515-7233567	7233590	NA	NA	NA
AT1G20816		non-targets	chr1	+	1	7235050-7235082	7235081	NA	7235081	NA
AT1G20823		non-targets	chr1	+	1	7239572-7239772	7239646	No	7239616	7239616
AT1G20830	MCD1	non-targets	chr1	+	1	7244850-7244853	7244852	Yes	7244850	7244852
AT1G20840	AtTMT1|TMT1	permissive	chr1	-	1	7244879-7245037	7244990	No	7244938	7244938
AT1G20850	XCP2	non-targets	chr1	+	1	7253606-7253741	7253736	No	7253672	7253672
AT1G20880		non-targets	chr1	-	1	7262072-7262209	7262131	Yes	7262072	7262086
AT1G20890		non-targets	chr1	-	1	7265813-7265991	7265920	No	7265821	7265821
AT1G20900	AHL27|ESC|ORE7	non-targets	chr1	+	1	7274053-7274233	7274093	Yes	7274073	7274075
AT1G20920	RCF1	non-targets	chr1	+	1	7289777-7289892	7289893	Yes	7289817	7289891
AT1G20950		stringent	chr1	-	1	7297252-7297331	7297299	No	7297296	7297296
AT1G20960	emb1507	stringent	chr1	-	1	7301647-7301835	7301857	Yes	7301773	7301750
AT1G20970		non-targets	chr1	+	2	7317827-7317849, 7319445-7319565	7317846, 7319562	Yes	7319527	7319509
AT1G20980	ATSPL14|FBR6|SPL14|SPL1R2	permissive	chr1	+	1	7329251-7329394	7329357	Yes	7329349	7329355
AT1G21000		non-targets	chr1	+	1	7339372-7339454	7339483	No	7339433	7339433
AT1G21010		non-targets	chr1	+	1	7346911-7347186	7347207	No	7347120	7347120
AT1G21050		non-targets	chr1	+	1	7367677-7367700	7367686	NA	7367686	NA
AT1G21065		stringent	chr1	+	1	7375676-7375789	7375760	No	7375745	7375745
AT1G21070		non-targets	chr1	-	1	7375874-7376045	7375963	No	7375963	7375963
AT1G21080		non-targets	chr1	-	1	7378586-7378672	7378596	No	7378591	7378591
AT1G21090		non-targets	chr1	+	2	7386221-7386237, 7386377-7386407	7386236, 7386406	Yes	7386406	7386236
AT1G21100	IGMT1	non-targets	chr1	-	1	7386792-7386839	7386838	NA	7386792	NA
AT1G21120	IGMT2	non-targets	chr1	-	1	7395226-7395263	7395263	Yes	7395227	7395226
AT1G21140		non-targets	chr1	+	1	7405250-7405377	7405327	Yes	7405330	7405252
AT1G21160		non-targets	chr1	-	1	7407978-7408053	7408052	NA	7407978	NA
AT1G21170	SEC5B	permissive	chr1	+	1	7419564-7419656	7419590	No	7419587	7419587
AT1G21190	LSM3A	permissive	chr1	-	1	7419661-7419819	7419884	Yes	7419796	7419663
AT1G21200		non-targets	chr1	+	1	7423215-7423218	7423217	NA	7423217	NA
AT1G21280		non-targets	chr1	-	1	7447543-7447591	7447590	NA	7447543	NA
AT1G21310	ATEXT3|EXT3|RSH	non-targets	chr1	-	2	7453227-7453344, 7454333-7454418	7453271, 7454400	No	7453250	7453250
AT1G21340		non-targets	chr1	+	1	7476999-7477179	7477075	Yes	7477075	7477066
AT1G21360	GLTP2	non-targets	chr1	+	1	7483285-7483504	7483446	Yes	7483437	7483350
AT1G21380		permissive	chr1	-	1	7485595-7485716	7485685	Yes	7485637	7485664
AT1G21390	emb2170	non-targets	chr1	-	1	7489073-7489159	7489126	Yes	7489081	7489079
AT1G21410	SKP2A	non-targets	chr1	+	1	7499525-7499578	7499577	NA	NA	7499577
AT1G21440		non-targets	chr1	-	1	7502165-7502240	7502239	NA	NA	7502165
AT1G21450	SCL1	non-targets	chr1	+	1	7511634-7511786	7511738	Yes	7511675	7511718
AT1G21480		non-targets	chr1	-	1	7518944-7519060	7519035	Yes	7518989	7518959
AT1G21510		NA	chr1	-	1	7531368-7531433	7531432	NA	NA	NA
AT1G21520		non-targets	chr1	-	1	7534133-7534334	7534427	Yes	7534333	7534247
AT1G21528		NA	chr1	-	1	7542613-7542732	7542783	NA	NA	NA
AT1G21580		non-targets	chr1	-	1	7557185-7557317	7557316	Yes	7557244	7557185
AT1G21590		non-targets	chr1	-	1	7566215-7566304	7566355	Yes	7566215	7566229
AT1G21600	PTAC6	non-targets	chr1	-	1	7571141-7571162	7571161	NA	NA	7571141
AT1G21610		permissive	chr1	+	1	7578854-7578961	7578935	Yes	7578881	7578923
AT1G21630		stringent	chr1	+	1	7588037-7588173	7588237	Yes	7588156	7588147
AT1G21640	ATNADK2|NADK2	stringent	chr1	+	1	7592808-7592918	7592837	Yes	7592808	7592838
AT1G21651		non-targets	chr1	-	1	7600817-7600946	7600883	Yes	7600883	7600824
AT1G21660		stringent	chr1	+	1	7609014-7609219	7609088	No	7609059	7609059
AT1G21670		non-targets	chr1	+	1	7612539-7612699	7612586	No	7612563	7612563
AT1G21680		non-targets	chr1	+	1	7615220-7615448	7615312	No	7615272	7615272
AT1G21690	EMB1968|RFC4	permissive	chr1	+	1	7618497-7618612	7618582	Yes	7618518	7618566
AT1G21700	ATSWI3C|CHB4|SWI3C	permissive	chr1	-	1	7619828-7620101	7620020	Yes	7619991	7619985
AT1G21710	ATOGG1|OGG1	permissive	chr1	+	1	7626076-7626149	7626116	No	7626103	7626103
AT1G21720	PBC1	stringent	chr1	+	1	7628164-7628264	7628247	No	7628224	7628224
AT1G21730		non-targets	chr1	+	2	7634585-7634588, 7636517-7636702	7634587, 7636596	Yes	7636567	7636593
AT1G21750	ATPDI5|ATPDIL1-1|PDI5|PDIL1-1	permissive	chr1	+	1	7648711-7648857	7648839	No	7648776	7648776
AT1G21760	ATFBP7|FBP7	permissive	chr1	+	1	7651764-7651829	7651856	Yes	7651812	7651810
AT1G21770		stringent	chr1	-	1	7651619-7651682	7651677	Yes	7651650	7651647
AT1G21780		non-targets	chr1	+	1	7654004-7654017	7654023	Yes	7654013	7654014
AT1G21790		non-targets	chr1	+	1	7655854-7655995	7655908	No	7655884	7655884
AT1G21830		non-targets	chr1	-	1	7661057-7661307	7661359	Yes	7661269	7661234
AT1G21880	LYM1|LYP2	permissive	chr1	+	2	7680667-7680684, 7682587-7682643	7680692, 7682667	Yes	7682642	7682635
AT1G21900	p24delta5	permissive	chr1	-	1	7690800-7690964	7690998	Yes	7690894	7690898
AT1G21910	DREB26	non-targets	chr1	+	2	7697495-7697598, 7697742-7697780	7697523, 7697779	No	7697518	7697518
AT1G21920		non-targets	chr1	-	1	7704224-7704337	7704337	No	7704295	7704295
AT1G21930		stringent	chr1	+	1	7714378-7714442	7714475	Yes	7714430	7714424
AT1G21980	ATPIP5K1|ATPIPK1|PIP5K1	non-targets	chr1	+	1	7738529-7738680	7738800	Yes	7738671	7738670
AT1G22020	SHM6	non-targets	chr1	+	2	7757334-7757539, 7757735-7757769	7757539, 7757768	Yes	7757538	7757336
AT1G22040		non-targets	chr1	+	1	7770043-7770171	7770170	Yes	7770170	7770155
AT1G22050	MUB6	permissive	chr1	+	1	7773116-7773171	7773151	Yes	7773121	7773151
AT1G22070	TGA3	permissive	chr1	+	1	7792040-7792213	7792145	Yes	7792112	7792094
AT1G22110		NA	chr1	-	2	7801374-7801426, 7801428-7801497	7801425, 7801496	NA	NA	NA
AT1G22140		non-targets	chr1	-	1	7814698-7814940	7814903	Yes	7814711	7814768
AT1G22170		permissive	chr1	+	1	7828221-7828371	7828391	No	7828317	7828317
AT1G22180		permissive	chr1	-	2	7828295-7828373, 7829945-7830047	7828309, 7830046	No	7828295	7828295
AT1G22190	RAP2.4	non-targets	chr1	+	2	7837128-7837172, 7837211-7837348	7837148, 7837329	Yes	7837279	7837148
AT1G22200		non-targets	chr1	-	1	7837597-7837700	7837644	No	7837620	7837620
AT1G22220	AUF2	non-targets	chr1	+	1	7847712-7847804	7847781	No	7847772	7847772
AT1G22230		non-targets	chr1	+	1	7851055-7851247	7851139	No	7851120	7851120
AT1G22270		permissive	chr1	+	1	7866014-7866141	7866160	Yes	7866098	7866080
AT1G22280	PAPP2C	non-targets	chr1	+	1	7875771-7876009	7875893	Yes	7875834	7875833
AT1G22300	14-3-3EPSILON|GF14 EPSILON|GRF10	stringent	chr1	-	1	7878722-7878926	7879013	No	7878879	7878879
AT1G22310	ATMBD8|MBD8	non-targets	chr1	-	1	7881540-7881564	7881586	No	7881563	7881563
AT1G22330		non-targets	chr1	+	1	7889385-7889559	7889510	No	7889449	7889449
AT1G22360	AtUGT85A2|UGT85A2	non-targets	chr1	-	2	7894732-7894983, 7896595-7896739	7895079, 7896811	No	7894906	7894906
AT1G22400	ATUGT85A1|UGT85A1	non-targets	chr1	-	2	7903656-7903799, 7905608-7905745	7903799, 7905850	Yes	7903698	7903775
AT1G22403		NA	chr1	-	1	7908564-7908581	7908580	NA	NA	NA
AT1G22410		stringent	chr1	+	1	7914868-7915019	7914972	No	7914926	7914926
AT1G22440		non-targets	chr1	+	1	7924847-7925015	7924990	Yes	7924850	7924990
AT1G22450	ATCOX6B2|COX6B	stringent	chr1	+	1	7927059-7927343	7927124	No	7927092	7927092
AT1G22460		non-targets	chr1	-	1	7927386-7927389	7927388	NA	7927386	NA
AT1G22470		non-targets	chr1	-	1	7932623-7932912	7932995	Yes	7932868	7932867
AT1G22500	AtATL15|ATL15	non-targets	chr1	+	1	7950820-7950902	7950958	No	7950892	7950892
AT1G22520		stringent	chr1	-	1	7952966-7953116	7953110	Yes	7953065	7953064
AT1G22530	PATL2	non-targets	chr1	-	1	7955470-7955618	7955660	No	7955570	7955570
AT1G22540		non-targets	chr1	+	1	7966329-7966524	7966592	Yes	7966456	7966523
AT1G22550		non-targets	chr1	-	1	7966497-7966595	7966596	Yes	7966532	7966497
AT1G22610		non-targets	chr1	+	1	7997677-7997819	7997826	No	7997753	7997753
AT1G22620	ATSAC1	non-targets	chr1	-	1	7997675-7997696	7997684	Yes	7997691	7997681
AT1G22640	ATMYB3|MYB3	non-targets	chr1	+	1	8007304-8007638	8007403	Yes	8007388	8007338
AT1G22650	A/N-InvD	non-targets	chr1	-	1	8013353-8013441	8013413	Yes	8013353	8013354
AT1G22700		non-targets	chr1	-	1	8028129-8028200	8028199	Yes	8028129	8028172
AT1G22710	ATSUC2|SUC2|SUT1	non-targets	chr1	-	1	8030600-8030749	8030826	Yes	8030723	8030726
AT1G22730		permissive	chr1	+	1	8048847-8049006	8049061	Yes	8048982	8049002
AT1G22740	ATRABG3B|RAB7|RAB75|RABG3B	non-targets	chr1	+	1	8050624-8050796	8050741	Yes	8050703	8050702
AT1G22750		stringent	chr1	+	1	8052826-8052952	8052935	Yes	8052903	8052862
AT1G22770	FB|GI	permissive	chr1	+	1	8067614-8067744	8067784	Yes	8067670	8067733
AT1G22780	PFL|PFL1|RPS18A	stringent	chr1	+	1	8069240-8069332	8069335	No	8069293	8069293
AT1G22790		permissive	chr1	+	1	8071367-8071572	8071493	Yes	8071437	8071438
AT1G22800		permissive	chr1	+	1	8074249-8074324	8074299	Yes	8074272	8074293
AT1G22840	ATCYTC-A|CYTC-1	stringent	chr1	+	1	8080430-8080604	8080510	No	8080473	8080473
AT1G22860		non-targets	chr1	+	1	8089238-8089274	8089271	No	8089264	8089264
AT1G22870		non-targets	chr1	+	1	8094433-8094453	8094433	NA	NA	8094433
AT1G22882		non-targets	chr1	+	1	8101217-8101370	8101291	No	8101288	8101288
AT1G22885		non-targets	chr1	+	1	8102297-8102351	8102350	Yes	8102297	8102350
AT1G22910		permissive	chr1	+	2	8106356-8106411, 8108055-8108275	8106410, 8108151	Yes	8108125	8108126
AT1G22920	AJH1|CSN5A	permissive	chr1	-	1	8109673-8109737	8109713	Yes	8109706	8109713
AT1G22930		permissive	chr1	+	1	8122029-8122146	8122159	No	8122120	8122120
AT1G22940	TH-1|TH1|THIE	non-targets	chr1	+	1	8125047-8125078	8125077	NA	NA	8125077
AT1G22950		non-targets	chr1	-	1	8125027-8125094	8125155	Yes	8125092	8125093
AT1G22960		non-targets	chr1	-	1	8127435-8127470	8127469	NA	NA	8127435
AT1G22970		non-targets	chr1	-	1	8130705-8130717	8130716	No	8130705	8130705
AT1G22985	CRF7	non-targets	chr1	-	1	8135128-8135277	8135296	No	8135216	8135216
AT1G23020	ATFRO3|FRO3	non-targets	chr1	-	2	8150068-8150171, 8153455-8153475	8150205, 8153455	Yes	8150134	8150156
AT1G23030		non-targets	chr1	+	1	8159034-8159121	8159107	Yes	8159082	8159080
AT1G23040		non-targets	chr1	+	1	8165600-8165792	8165882	No	8165754	8165754
AT1G23050		non-targets	chr1	+	1	8169208-8169259	8169264	Yes	8169242	8169246
AT1G23060	MDP40	non-targets	chr1	-	2	8170686-8170822, 8171616-8171624	8170826, 8171616	Yes	8170771	8170746
AT1G23080	ATPIN7|PIN7	non-targets	chr1	-	2	8180400-8180495, 8180590-8180626	8180507, 8180625	Yes	8180590	8180603
AT1G23100		permissive	chr1	+	1	8196450-8196480	8196489	Yes	8196469	8196470
AT1G23140		non-targets	chr1	-	1	8202182-8202265	8202296	Yes	8202258	8202226
AT1G23170		permissive	chr1	+	1	8215749-8215897	8215884	Yes	8215771	8215884
AT1G23180		non-targets	chr1	+	1	8219617-8219743	8219742	NA	8219742	NA
AT1G23190	PGM3	stringent	chr1	+	1	8224351-8224498	8224452	No	8224402	8224402
AT1G23205		non-targets	chr1	-	1	8233976-8234107	8234225	Yes	8233978	8233996
AT1G23220		permissive	chr1	+	2	8244300-8244318, 8244321-8244342	8244317, 8244341	Yes	8244317	8244341
AT1G23230		permissive	chr1	+	1	8251887-8251999	8252061	Yes	8251951	8251997
AT1G23260	MMZ1|UEV1A	stringent	chr1	-	1	8256820-8257103	8257087	Yes	8257029	8257051
AT1G23280		permissive	chr1	-	1	8260641-8260766	8260780	Yes	8260709	8260641
AT1G23290	RPL27A|RPL27AB	stringent	chr1	+	1	8263519-8263674	8263571	Yes	8263552	8263548
AT1G23310	AOAT1|GGAT1|GGT1	stringent	chr1	-	1	8268507-8268651	8268653	Yes	8268507	8268529
AT1G23330		non-targets	chr1	-	1	8279614-8279712	8279749	Yes	8279667	8279614
AT1G23340		non-targets	chr1	-	1	8286374-8286375	8286374	NA	8286374	NA
AT1G23360	MENG	non-targets	chr1	-	1	8295209-8295245	8295244	NA	8295209	NA
AT1G23380	KNAT6|KNAT6L|KNAT6S	non-targets	chr1	-	1	8297163-8297294	8297290	Yes	8297289	8297290
AT1G23390		non-targets	chr1	-	2	8309112-8309152, 8309322-8309349	8309151, 8309348	Yes	8309322	8309112
AT1G23400	ATCAF2|CAF2	non-targets	chr1	-	1	8312000-8312119	8312118	NA	8312000	NA
AT1G23410		permissive	chr1	+	1	8315505-8315625	8315656	Yes	8315624	8315559
AT1G23440		permissive	chr1	+	2	8323366-8323377, 8324147-8324425	8323376, 8324294	No	8324233	8324233
AT1G23450		NA	chr1	+	1	8324723-8324772	8324771	NA	NA	NA
AT1G23460		non-targets	chr1	+	1	8329711-8329834	8329796	Yes	8329717	8329793
AT1G23480	ATCSLA03|ATCSLA3|CSLA03|CSLA3	non-targets	chr1	+	1	8336246-8336428	8336390	Yes	8336390	8336252
AT1G23490	ARF1|ATARF|ATARF1|ATARFA1A	stringent	chr1	+	1	8338533-8338828	8338740	Yes	8338602	8338579
AT1G23530		non-targets	chr1	+	1	8346577-8346650	8346647	No	8346647	8346647
AT1G23550	SRO2	non-targets	chr1	+	1	8352781-8352799	8352781	NA	NA	8352781
AT1G23560		non-targets	chr1	-	1	8352649-8352784	8352783	Yes	8352649	8352703
AT1G23710		non-targets	chr1	+	1	8386362-8386492	8386578	No	8386491	8386491
AT1G23720		non-targets	chr1	+	1	8391485-8391630	8391629	No	8391558	8391558
AT1G23750		permissive	chr1	+	1	8401387-8401556	8401491	Yes	8401424	8401464
AT1G23760	JP630|PG3	non-targets	chr1	+	1	8404158-8404323	8404358	Yes	8404223	8404322
AT1G23780		non-targets	chr1	-	1	8406664-8406823	8406822	Yes	8406708	8406790
AT1G23800	ALDH2B|ALDH2B7	permissive	chr1	-	1	8412009-8412137	8412051	No	8412051	8412051
AT1G23820	SPDS1	permissive	chr1	+	1	8422843-8422993	8422895	Yes	8422895	8422858
AT1G23850		non-targets	chr1	-	1	8425780-8425799	8425789	Yes	8425788	8425780
AT1G23860	At-RSZ21|RSZ21|RSZP21|SRZ-21|SRZ21	permissive	chr1	-	2	8427316-8427320, 8427716-8427909	8427319, 8428045	Yes	8427716	8427820
AT1G23870	ATTPS9|TPS9	non-targets	chr1	+	1	8435731-8435935	8435795	No	8435777	8435777
AT1G23880		non-targets	chr1	+	1	8438761-8438836	8438865	No	8438813	8438813
AT1G23900	GAMMA-ADAPTIN 1|Gamma-ADR	permissive	chr1	+	2	8447474-8447526, 8447741-8447759	8447554, 8447758	No	8447518	8447518
AT1G23950		non-targets	chr1	-	1	8469522-8469614	8469557	No	8469550	8469550
AT1G23960		NA	chr1	-	1	8478393-8478485	8478496	NA	NA	NA
AT1G23970		non-targets	chr1	-	1	8482001-8482073	8482041	No	8482016	8482016
AT1G23980		non-targets	chr1	-	1	8484652-8484675	8484674	NA	8484652	NA
AT1G24030		non-targets	chr1	+	1	8505259-8505535	8505744	Yes	8505534	8505471
AT1G24050		stringent	chr1	+	1	8508732-8508865	8508877	Yes	8508853	8508767
AT1G24100	UGT74B1	non-targets	chr1	-	1	8525376-8525456	8525440	Yes	8525437	8525433
AT1G24120	ARL1	non-targets	chr1	-	1	8529044-8529179	8529225	No	8529141	8529141
AT1G24130		non-targets	chr1	-	1	8534014-8534217	8534269	Yes	8534014	8534141
AT1G24150	ATFH4|FH4	non-targets	chr1	+	1	8552006-8552019	8552018	NA	NA	8552018
AT1G24160		non-targets	chr1	-	1	8553419-8553486	8553485	NA	NA	8553419
AT1G24170	GATL8|LGT9	non-targets	chr1	-	1	8557208-8557305	8557218	No	8557216	8557216
AT1G24180	IAR4	stringent	chr1	-	1	8560412-8560626	8560739	No	8560578	8560578
AT1G24190	ATSIN3|SIN3|SNL3	non-targets	chr1	-	2	8563509-8563560, 8567398-8567401	8563542, 8567400	Yes	8563542	8563532
AT1G24240		permissive	chr1	+	1	8588074-8588176	8588153	Yes	8588074	8588174
AT1G24267		permissive	chr1	-	1	8604031-8604139	8604155	Yes	8604101	8604120
AT1G24280	G6PD3	non-targets	chr1	+	1	8612526-8612582	8612625	No	8612578	8612578
AT1G24300		non-targets	chr1	-	2	8614367-8614398, 8619518-8619562	8614369, 8619561	No	8614369	8614369
AT1G24320		non-targets	chr1	-	1	8626302-8626327	8626330	Yes	8626326	8626302
AT1G24350		NA	chr1	-	1	8638856-8638938	8638915	NA	NA	NA
AT1G24360		stringent	chr1	+	1	8643413-8643485	8643505	No	8643459	8643459
AT1G24440		non-targets	chr1	+	1	8663882-8663980	8664020	No	8663963	8663963
AT1G24450	NFD2	non-targets	chr1	+	1	8665222-8665248	8665247	NA	8665247	NA
AT1G24460	TNO1	permissive	chr1	+	2	8667165-8667177, 8672537-8672739	8667168, 8672733	Yes	8667168	8672698
AT1G24490	ALB4|ARTEMIS	non-targets	chr1	+	1	8685232-8685277	8685309	No	8685273	8685273
AT1G24510		stringent	chr1	-	1	8685231-8685397	8685456	No	8685359	8685359
AT1G24530		non-targets	chr1	+	1	8694613-8694746	8694791	Yes	8694728	8694745
AT1G24560		non-targets	chr1	+	3	8704665-8704668, 8705329-8705342, 8705786-8705858	8704667, 8705329, 8705899	No	8705843	8705843
AT1G24600		non-targets	chr1	+	1	8720650-8720793	8720746	Yes	8720693	8720722
AT1G24610		permissive	chr1	-	1	8720750-8720822	8720794	Yes	8720759	8720771
AT1G24620		non-targets	chr1	-	1	8723610-8723715	8723714	Yes	8723703	8723610
AT1G24625	ZFP7	non-targets	chr1	-	1	8725837-8725945	8725922	Yes	8725900	8725883
AT1G24706	AtTHO2|EMB2793|THO2	non-targets	chr1	+	2	8754435-8754470, 8755393-8755575	8754469, 8755718	Yes	8755574	8755572
AT1G24735		non-targets	chr1	+	1	8759503-8759609	8759563	Yes	8759568	8759563
AT1G24764	ATMAP70-2|MAP70-2	non-targets	chr1	-	2	8759535-8759544, 8762175-8762283	8759535, 8762180	Yes	8762180	8762175
AT1G24793	AtLpxC1|LpxC1	non-targets	chr1	+	1	8769337-8769470	8769486	Yes	8769447	8769377
AT1G24800		NA	chr1	+	1	8771129-8771327	8771325	NA	NA	NA
AT1G24807		NA	chr1	-	1	8771407-8771805	8771684	NA	NA	NA
AT1G24880	AtLpxC2|LpxC2	non-targets	chr1	+	3	8775914-8776137, 8776395-8776539, 8777972-8778068	8776041, 8776544, 8778106	No	8776041	8776041
AT1G24881		non-targets	chr1	+	1	8785508-8785706	8785704	No	8785625	8785625
AT1G24909		NA	chr1	-	1	8785786-8786184	8786063	NA	NA	NA
AT1G25054	AtLpxC3|LpxC3	non-targets	chr1	+	1	8806245-8806378	8806394	Yes	8806355	8806285
AT1G25055		non-targets	chr1	+	1	8808037-8808235	8808233	No	8808154	8808154
AT1G25083		NA	chr1	-	1	8808315-8808713	8808592	NA	NA	NA
AT1G25098		NA	chr1	+	3	8813235-8813445, 8814183-8814497, 8814878-8814974	8813482, 8814341, 8815012	NA	NA	NA
AT1G25145	AtLpxC4|LpxC4	non-targets	chr1	+	1	8820623-8820756	8820772	Yes	8820733	8820663
AT1G25150		non-targets	chr1	+	1	8822415-8822613	8822611	No	8822532	8822532
AT1G25155		NA	chr1	-	1	8822693-8823091	8822970	NA	NA	NA
AT1G25175		NA	chr1	+	3	8827613-8827823, 8828561-8828875, 8829256-8829352	8827860, 8828719, 8829390	NA	NA	NA
AT1G25210	AtLpxC5|LpxC5	NA	chr1	+	1	8835001-8835134	8835150	NA	NA	NA
AT1G25211		non-targets	chr1	+	1	8836831-8836966	8836931	Yes	8836910	8836855
AT1G25220	ASB1|TRP4|WEI7	non-targets	chr1	-	1	8837201-8837312	8837281	Yes	8837256	8837201
AT1G25230		non-targets	chr1	-	2	8840255-8840469, 8841043-8841111	8840575, 8841110	No	8840416	8840416
AT1G25260		stringent	chr1	-	1	8853920-8854060	8853976	No	8853958	8853958
AT1G25275		non-targets	chr1	+	1	8861247-8861526	8861395	No	8861324	8861324
AT1G25280	AtTLP10|TLP10	stringent	chr1	+	1	8866726-8866830	8866781	No	8866770	8866770
AT1G25290	ATRBL10|ATRBL7|AtRBL8|RBL10|RBL8	non-targets	chr1	+	1	8869096-8869129	8869128	Yes	8869128	8869097
AT1G25320		non-targets	chr1	+	1	8880252-8880359	8880355	No	8880309	8880309
AT1G25350	OVA9	permissive	chr1	-	1	8889025-8889153	8889163	Yes	8889107	8889134
AT1G25370		non-targets	chr1	-	1	8897672-8897774	8897787	Yes	8897755	8897672
AT1G25375		non-targets	chr1	-	1	8900125-8900143	8900142	NA	NA	8900125
AT1G25380	ATNDT2|NDT2	permissive	chr1	+	1	8905950-8906016	8906020	Yes	8905969	8906001
AT1G25400		non-targets	chr1	-	1	8911129-8911255	8911238	Yes	8911159	8911220
AT1G25420		permissive	chr1	+	1	8918161-8918271	8918269	Yes	8918231	8918199
AT1G25450	CER60|KCS5	non-targets	chr1	-	1	8938427-8938551	8938499	Yes	8938477	8938474
AT1G25470	CRF12	non-targets	chr1	-	3	8944573-8944614, 8944616-8944637, 8944709-8944745	8944613, 8944636, 8944744	Yes	8944573	8944616
AT1G25480		permissive	chr1	+	1	8951001-8951087	8951086	Yes	8951086	8951058
AT1G25490	ATB BETA BETA|EER1|RCN1|REGA	permissive	chr1	+	1	8955000-8955120	8955071	No	8955051	8955051
AT1G25500		non-targets	chr1	-	1	8955217-8955278	8955242	Yes	8955223	8955217
AT1G25520		stringent	chr1	+	1	8964408-8964562	8964520	Yes	8964464	8964474
AT1G25530		permissive	chr1	-	2	8964609-8964682, 8966424-8966459	8964699, 8966458	Yes	8964678	8964636
AT1G25540	MED25|PFT1	permissive	chr1	-	1	8969152-8969195	8969157	No	8969155	8969155
AT1G25550		non-targets	chr1	+	1	8978023-8978108	8978138	No	8978092	8978092
AT1G25560	EDF1|TEM1	non-targets	chr1	-	1	8981557-8981783	8981820	No	8981677	8981677
AT1G25570		non-targets	chr1	-	1	8991786-8991932	8991837	No	8991826	8991826
AT1G25580	ANAC008|SOG1	permissive	chr1	-	2	8996766-8996839, 8999794-8999870	8996767, 8999869	No	8996767	8996767
AT1G25682		non-targets	chr1	-	1	9002258-9002467	9002390	Yes	9002389	9002344
AT1G26100		non-targets	chr1	-	1	9022471-9022629	9022710	Yes	9022603	9022471
AT1G26110	DCP5	stringent	chr1	-	1	9024342-9024420	9024345	No	9024344	9024344
AT1G26120	ICME-LIKE1	permissive	chr1	-	1	9028340-9028468	9028492	Yes	9028407	9028382
AT1G26160		non-targets	chr1	-	1	9044437-9044597	9044593	Yes	9044558	9044448
AT1G26170		permissive	chr1	-	1	9047326-9047396	9047421	Yes	9047356	9047382
AT1G26180		non-targets	chr1	+	1	9056838-9056918	9056931	Yes	9056917	9056862
AT1G26190		permissive	chr1	-	1	9057090-9057127	9057126	NA	NA	9057090
AT1G26210	ATSOFL1|SOFL1	non-targets	chr1	+	1	9068205-9068224	9068205	NA	NA	9068205
AT1G26218		NA	chr1	-	1	9071745-9071775	9071774	NA	NA	NA
AT1G26270		non-targets	chr1	-	1	9089456-9089582	9089582	No	9089523	9089523
AT1G26300		non-targets	chr1	-	1	9095767-9095928	9096029	Yes	9095899	9095835
AT1G26340	ATCB5-A|B5 #6|CB5-A	non-targets	chr1	+	1	9114879-9114976	9115031	Yes	9114971	9114968
AT1G26440	ATUPS5|UPS5	non-targets	chr1	-	2	9143956-9144019, 9144991-9144994	9144041, 9144993	Yes	9143956	9143978
AT1G26450		non-targets	chr1	-	2	9148563-9148801, 9149341-9149343	9148759, 9149342	No	9148715	9148715
AT1G26460		permissive	chr1	+	2	9154565-9154593, 9154643-9154759	9154570, 9154762	No	9154737	9154737
AT1G26470	SNS1	permissive	chr1	+	1	9156156-9156358	9156299	Yes	9156245	9156246
AT1G26550		stringent	chr1	+	1	9172850-9173007	9172925	Yes	9172922	9172872
AT1G26580		non-targets	chr1	+	1	9187419-9187505	9187545	No	9187504	9187504
AT1G26620		non-targets	chr1	-	1	9195539-9195606	9195637	Yes	9195539	9195589
AT1G26630	ATELF5A-2|ELF5A-2|FBR12	stringent	chr1	+	1	9207242-9207421	9207343	No	9207293	9207293
AT1G26640		permissive	chr1	-	1	9207410-9207502	9207480	Yes	9207412	9207413
AT1G26650		non-targets	chr1	+	1	9211444-9211553	9211581	Yes	9211540	9211541
AT1G26660		permissive	chr1	+	1	9213949-9213961	9213949	Yes	9213949	9213951
AT1G26665		permissive	chr1	+	1	9215492-9215594	9215601	No	9215550	9215550
AT1G26670	ATVTI12|VTI12|VTI1B	stringent	chr1	+	1	9217898-9218040	9217988	Yes	9217937	9217949
AT1G26690		non-targets	chr1	-	1	9224083-9224199	9224159	No	9224151	9224151
AT1G26700	ATMLO14|MLO14	non-targets	chr1	+	1	9232324-9232379	9232378	Yes	9232378	9232376
AT1G26720		NA	chr1	-	1	9234006-9234008	9234007	NA	NA	NA
AT1G26730		non-targets	chr1	+	1	9244755-9244773	9244772	Yes	9244772	9244770
AT1G26740		permissive	chr1	-	1	9244975-9245092	9245198	Yes	9244983	9244975
AT1G26750		permissive	chr1	+	1	9248147-9248305	9248262	No	9248219	9248219
AT1G26800		non-targets	chr1	-	1	9285456-9285554	9285498	Yes	9285483	9285490
AT1G26820	RNS3	non-targets	chr1	-	1	9292513-9292658	9292653	Yes	9292616	9292617
AT1G26830	ATCUL3|ATCUL3A|CUL3|CUL3A	non-targets	chr1	+	1	9298504-9298543	9298556	Yes	9298537	9298535
AT1G26840	ATORC6|ORC6	non-targets	chr1	+	1	9300696-9300770	9300770	Yes	9300769	9300697
AT1G26850		stringent	chr1	-	1	9300835-9301008	9300996	No	9300934	9300934
AT1G26880		stringent	chr1	-	1	9315351-9315504	9315393	No	9315382	9315382
AT1G26900		non-targets	chr1	-	1	9319556-9319609	9319608	No	9319578	9319578
AT1G26910	RPL10B	permissive	chr1	+	1	9322953-9323002	9323009	Yes	9322971	9322993
AT1G26920		non-targets	chr1	+	1	9330212-9330485	9330453	Yes	9330340	9330341
AT1G26930		non-targets	chr1	-	1	9336014-9336209	9336237	Yes	9336170	9336175
AT1G26940		permissive	chr1	+	1	9345115-9345408	9345152	Yes	9345144	9345146
AT1G26945	KDR|PRE6	non-targets	chr1	+	1	9352697-9352788	9352843	Yes	9352787	9352760
AT1G26960	AtHB23|HB23	non-targets	chr1	+	1	9357306-9357474	9357591	No	9357452	9357452
AT1G26970		non-targets	chr1	+	2	9359778-9359802, 9361768-9361857	9359821, 9361856	Yes	9359800	9359801
AT1G27000		stringent	chr1	+	1	9376617-9376800	9376724	Yes	9376677	9376680
AT1G27030		non-targets	chr1	+	1	9383863-9383989	9384015	Yes	9383983	9383895
AT1G27090		stringent	chr1	-	1	9403818-9403928	9403880	Yes	9403839	9403907
AT1G27100		non-targets	chr1	-	1	9407219-9407358	9407363	Yes	9407316	9407271
AT1G27120		non-targets	chr1	+	1	9424038-9424068	9424066	Yes	9424066	9424064
AT1G27130	ATGSTU13|GST12|GSTU13	permissive	chr1	+	1	9426683-9426957	9426837	No	9426765	9426765
AT1G27140	ATGSTU14|GST13|GSTU14	non-targets	chr1	+	1	9428761-9428861	9428856	Yes	9428817	9428816
AT1G27150		permissive	chr1	+	1	9432125-9432310	9432149	No	9432141	9432141
AT1G27190		non-targets	chr1	-	1	9446652-9446697	9446662	Yes	9446661	9446662
AT1G27200		non-targets	chr1	-	1	9449224-9449660	9449558	No	9449551	9449551
AT1G27210		non-targets	chr1	-	2	9455300-9455460, 9457931-9457952	9455516, 9457962	Yes	9457947	9455307
AT1G27290		non-targets	chr1	+	1	9482818-9482994	9482970	No	9482900	9482900
AT1G27310	NTF2A	stringent	chr1	-	1	9484291-9484439	9484434	No	9484368	9484368
AT1G27320	AHK3|HK3	permissive	chr1	+	1	9492515-9492574	9492571	Yes	9492521	9492565
AT1G27330		stringent	chr1	+	2	9494009-9494142, 9494388-9494442	9494086, 9494441	No	9494052	9494052
AT1G27340	LCR	permissive	chr1	+	1	9497987-9498083	9498063	No	9498026	9498026
AT1G27350		NA	chr1	-	1	9498061-9498197	9498258	NA	NA	NA
AT1G27360	SPL11	non-targets	chr1	+	1	9503805-9503812	9503811	Yes	9503805	9503811
AT1G27380	RIC2	non-targets	chr1	-	1	9508529-9508833	9508850	Yes	9508763	9508760
AT1G27385		non-targets	chr1	-	1	9510934-9511044	9511064	Yes	9510955	9511020
AT1G27390	TOM20-2	permissive	chr1	-	1	9513088-9513255	9513229	No	9513163	9513163
AT1G27400		stringent	chr1	+	1	9516792-9516997	9516886	No	9516846	9516846
AT1G27420		non-targets	chr1	+	1	9520669-9520746	9520721	Yes	9520720	9520702
AT1G27430		non-targets	chr1	-	1	9520886-9520940	9520927	Yes	9520910	9520891
AT1G27435		stringent	chr1	-	1	9527474-9527800	9527945	Yes	9527722	9527724
AT1G27440	ATGUT1|GUT2|IRX10	non-targets	chr1	-	1	9528968-9529069	9529090	Yes	9529056	9529048
AT1G27450	APT1|ATAPT1	stringent	chr1	+	1	9533945-9534113	9534081	Yes	9534018	9534016
AT1G27460	NPGR1	non-targets	chr1	+	1	9537464-9537567	9537564	Yes	9537558	9537566
AT1G27470		permissive	chr1	-	1	9540101-9540127	9540126	Yes	9540126	9540102
AT1G27500	KLCR3	non-targets	chr1	-	1	9551450-9551576	9551632	Yes	9551457	9551450
AT1G27510	EX2	permissive	chr1	-	1	9554681-9554847	9554898	Yes	9554745	9554693
AT1G27520		non-targets	chr1	+	1	9562302-9562334	9562307	Yes	9562327	9562302
AT1G27530		stringent	chr1	-	1	9562532-9562654	9562695	Yes	9562644	9562614
AT1G27540		non-targets	chr1	-	1	9566331-9566405	9566390	Yes	9566331	9566390
AT1G27600	I9H|IRX9-L	non-targets	chr1	-	1	9603512-9603591	9603552	Yes	9603551	9603552
AT1G27620		non-targets	chr1	+	1	9610486-9610568	9610516	Yes	9610486	9610546
AT1G27630	CYCT1;3	non-targets	chr1	+	1	9614226-9614329	9614325	No	9614292	9614292
AT1G27650	ATU2AF35A	permissive	chr1	+	1	9616276-9616396	9616383	No	9616331	9616331
AT1G27660		non-targets	chr1	+	1	9625958-9626038	9626028	Yes	9625975	9626017
AT1G27670		non-targets	chr1	-	1	9627534-9627592	9627598	Yes	9627565	9627534
AT1G27680	APL2	non-targets	chr1	+	1	9634553-9634575	9634574	Yes	9634574	9634568
AT1G27690		non-targets	chr1	+	1	9638509-9638557	9638556	Yes	9638556	9638528
AT1G27695		NA	chr1	+	1	9640073-9640181	9640151	NA	NA	NA
AT1G27700		non-targets	chr1	-	1	9640135-9640246	9640267	Yes	9640219	9640242
AT1G27730	STZ|ZAT10	non-targets	chr1	-	1	9648034-9648227	9648213	No	9648154	9648154
AT1G27740	RSL4	non-targets	chr1	+	1	9655943-9656081	9656165	Yes	9656080	9656079
AT1G27750		non-targets	chr1	+	1	9661904-9662067	9661957	Yes	9661957	9661958
AT1G27760	ATSAT32|SAT32	permissive	chr1	+	1	9671448-9671673	9671553	No	9671502	9671502
AT1G27770	ACA1|PEA1	permissive	chr1	-	1	9671634-9671718	9671710	Yes	9671635	9671636
AT1G27840	ATCSA-1	permissive	chr1	-	1	9692999-9693223	9693285	Yes	9693141	9693172
AT1G27850		non-targets	chr1	+	1	9703915-9703998	9704015	Yes	9703995	9703937
AT1G27900		permissive	chr1	-	1	9715352-9715491	9715566	Yes	9715352	9715428
AT1G27910	ATPUB45|PUB45	non-targets	chr1	-	1	9720733-9720847	9720788	No	9720736	9720736
AT1G27920	MAP65-8	non-targets	chr1	+	1	9729985-9730099	9729985	NA	9729985	NA
AT1G27930		non-targets	chr1	-	1	9731245-9731437	9731511	Yes	9731389	9731323
AT1G27950	LTPG1	NA	chr1	+	1	9742112-9742163	9742185	NA	NA	NA
AT1G27960	ECT9	non-targets	chr1	-	1	9742193-9742229	9742193	No	9742193	9742193
AT1G27970	NTF2B	stringent	chr1	+	1	9747951-9748182	9748045	No	9747999	9747999
AT1G27980	ATDPL1|DPL1	non-targets	chr1	+	1	9752737-9752750	9752746	Yes	9752741	9752742
AT1G28050	BBX13	permissive	chr1	-	1	9775521-9775627	9775637	No	9775582	9775582
AT1G28060		non-targets	chr1	+	2	9780501-9780508, 9782596-9782716	9780507, 9782596	Yes	9782596	9782619
AT1G28070		non-targets	chr1	+	1	9783915-9784062	9784040	Yes	9784020	9784006
AT1G28090		permissive	chr1	+	2	9796360-9796373, 9798911-9799030	9796372, 9799029	Yes	9799029	9796372
AT1G28110	SCPL45	permissive	chr1	-	2	9803713-9803744, 9803896-9803998	9803759, 9804017	Yes	9803941	9803997
AT1G28120		stringent	chr1	-	1	9812923-9813008	9813031	Yes	9812964	9812956
AT1G28130	GH3.17	non-targets	chr1	+	2	9825999-9826000, 9827948-9828070	9825999, 9828075	Yes	9828066	9828041
AT1G28150		NA	chr1	-	1	9834882-9835015	9835115	NA	NA	NA
AT1G28170	SOT7	NA	chr1	+	1	9842399-9842451	9842450	NA	NA	NA
AT1G28190		non-targets	chr1	-	1	9846827-9846944	9846901	NA	NA	9846901
AT1G28200	FIP1	permissive	chr1	-	2	9849867-9849875, 9850116-9850260	9849874, 9850299	Yes	9850223	9850222
AT1G28230	ATPUP1|PUP1	non-targets	chr1	-	1	9862049-9862087	9862105	Yes	9862086	9862053
AT1G28240		non-targets	chr1	-	1	9868158-9868380	9868369	No	9868335	9868335
AT1G28250		NA	chr1	+	1	9875469-9875621	9875527	NA	NA	NA
AT1G28280		non-targets	chr1	-	2	9885269-9885391, 9886365-9886565	9885390, 9886634	Yes	9886514	9886489
AT1G28290	AGP31	permissive	chr1	-	1	9889073-9889166	9889183	No	9889134	9889134
AT1G28320	DEG15	non-targets	chr1	-	1	9920477-9920584	9920619	Yes	9920477	9920479
AT1G28330	AtDRM1|DRM1|DYL1	non-targets	chr1	-	1	9933803-9933979	9933988	No	9933923	9933923
AT1G28340	AtRLP4|RLP4	permissive	chr1	+	1	9943502-9943574	9943565	No	9943543	9943543
AT1G28350		permissive	chr1	+	1	9949749-9949820	9949846	Yes	9949800	9949795
AT1G28360	ATERF12|ERF12	non-targets	chr1	+	1	9952705-9952738	9952737	NA	NA	9952737
AT1G28370	ATERF11|ERF11	non-targets	chr1	-	1	9956067-9956290	9956289	Yes	9956101	9956067
AT1G28380	NSL1	non-targets	chr1	+	1	9966213-9966364	9966397	Yes	9966307	9966316
AT1G28390		non-targets	chr1	-	1	9966595-9966695	9966668	Yes	9966597	9966627
AT1G28395		permissive	chr1	-	1	9969347-9969558	9969574	Yes	9969347	9969436
AT1G28400		non-targets	chr1	-	1	9972450-9972635	9972618	No	9972610	9972610
AT1G28410		permissive	chr1	-	1	9976158-9976369	9976181	Yes	9976181	9976243
AT1G28440	HSL1	non-targets	chr1	+	1	10000345-10000449	10000543	No	10000446	10000446
AT1G28470	ANAC010|NAC010|SND3	non-targets	chr1	+	2	10012093-10012109, 10012167-10012198	10012108, 10012197	Yes	10012108	10012197
AT1G28480	GRX480|roxy19	non-targets	chr1	-	1	10013405-10013557	10013544	No	10013495	10013495
AT1G28490	ATSYP61|OSM1|SYP61	permissive	chr1	+	1	10017919-10018056	10018029	Yes	10017973	10017977
AT1G28500		NA	chr1	+	1	10020562-10020615	10020614	NA	NA	NA
AT1G28510		permissive	chr1	+	1	10026211-10026306	10026265	No	10026244	10026244
AT1G28520	ATVOZ1|VOZ1	non-targets	chr1	+	1	10031877-10031967	10031964	No	10031964	10031964
AT1G28560	SRD2	non-targets	chr1	-	1	10038030-10038065	10038091	Yes	10038035	10038030
AT1G28580		permissive	chr1	-	1	10044369-10044479	10044448	No	10044448	10044448
AT1G28660		non-targets	chr1	-	1	10071735-10071739	10071738	NA	10071735	NA
AT1G28670	ARAB-1	non-targets	chr1	-	1	10074496-10074551	10074550	NA	10074496	NA
AT1G28680		permissive	chr1	+	1	10079873-10080198	10079968	Yes	10079937	10079912
AT1G28710		non-targets	chr1	-	1	10086658-10086692	10086691	NA	NA	10086658
AT1G28760		non-targets	chr1	+	1	10104782-10104792	10104782	Yes	10104791	10104782
AT1G28815		non-targets	chr1	+	1	10096268-10096395	10096326	Yes	10096304	10096323
AT1G28960	ATNUDT15|ATNUDX15|NUDX15	permissive	chr1	-	1	10109498-10109623	10109703	Yes	10109585	10109622
AT1G29020		non-targets	chr1	-	1	10120330-10120466	10120346	NA	10120346	NA
AT1G29025		non-targets	chr1	-	2	10124097-10124404, 10124492-10124522	10124451, 10124510	No	10124346	10124346
AT1G29030		non-targets	chr1	-	1	10128934-10128950	10128949	NA	10128934	NA
AT1G29040		non-targets	chr1	+	1	10135278-10135364	10135419	No	10135355	10135355
AT1G29050	TBL38	non-targets	chr1	-	1	10136094-10136300	10136328	No	10136231	10136231
AT1G29060		permissive	chr1	+	1	10149599-10149727	10149683	Yes	10149683	10149602
AT1G29070		stringent	chr1	+	1	10151238-10151514	10151369	Yes	10151311	10151302
AT1G29071	SNOR105	NA	chr1	-	1	10151531-10151703	10151676	NA	NA	NA
AT1G29120		non-targets	chr1	+	1	10178373-10178514	10178536	Yes	10178513	10178419
AT1G29150	ATS9|RPN6	stringent	chr1	+	1	10182611-10182808	10182788	No	10182701	10182701
AT1G29160		non-targets	chr1	-	1	10183417-10183653	10183824	Yes	10183619	10183512
AT1G29195		non-targets	chr1	-	1	10202354-10202605	10202729	Yes	10202537	10202545
AT1G29220		permissive	chr1	-	1	10210453-10210557	10210555	Yes	10210514	10210512
AT1G29230	ATCIPK18|ATWL1|CIPK18|SnRK3.20|WL1	NA	chr1	+	1	10216472-10216507	10216506	NA	NA	NA
AT1G29250		stringent	chr1	-	1	10223210-10223355	10223329	No	10223270	10223270
AT1G29260	ATPEX7|PEX7	non-targets	chr1	+	1	10225975-10226083	10226084	No	10226035	10226035
AT1G29280	ATWRKY65|WRKY65	non-targets	chr1	+	1	10237583-10237990	10237694	No	10237622	10237622
AT1G29300	UNE1	non-targets	chr1	-	1	10247713-10247836	10247738	No	10247733	10247733
AT1G29310		permissive	chr1	+	1	10254595-10254752	10254750	No	10254689	10254689
AT1G29330	AERD2|ATERD2|ERD2	permissive	chr1	-	1	10258215-10258385	10258371	No	10258351	10258351
AT1G29340	ATPUB17|PUB17	non-targets	chr1	+	1	10266710-10266972	10266722	Yes	10266722	10266726
AT1G29350		permissive	chr1	-	2	10268445-10268629, 10272381-10272382	10268673, 10272381	No	10268570	10268570
AT1G29357		NA	chr1	-	1	10274008-10274078	10274084	NA	NA	NA
AT1G29370		permissive	chr1	-	2	10277763-10277926, 10281790-10281797	10277991, 10281794	No	10277889	10277889
AT1G29390	COR314-TM2|COR413IM2	permissive	chr1	-	1	10286222-10286349	10286354	Yes	10286289	10286288
AT1G29400	AML5|ML5	non-targets	chr1	-	1	10289949-10290092	10290066	No	10290039	10290039
AT1G29410	PAI3	non-targets	chr1	-	1	10297875-10297923	10297922	NA	NA	10297875
AT1G29418		non-targets	chr1	+	1	10301272-10301315	10301325	No	10301301	10301301
AT1G29470		NA	chr1	-	1	10310212-10310319	10310251	NA	NA	NA
AT1G29520		non-targets	chr1	+	1	10324675-10324746	10324745	NA	NA	10324745
AT1G29550		non-targets	chr1	+	1	10332160-10332340	10332296	Yes	10332296	10332327
AT1G29630		non-targets	chr1	+	1	10353730-10353733	10353732	Yes	10353732	10353731
AT1G29640		non-targets	chr1	-	1	10355619-10355777	10355779	No	10355701	10355701
AT1G29690	CAD1	permissive	chr1	-	1	10379010-10379133	10379132	Yes	10379054	10379090
AT1G29700		non-targets	chr1	-	1	10385028-10385129	10385128	NA	NA	10385028
AT1G29760		non-targets	chr1	+	1	10424179-10424439	10424297	Yes	10424248	10424250
AT1G29785		NA	chr1	-	1	10428507-10428544	10428511	NA	NA	NA
AT1G29790		permissive	chr1	+	1	10431896-10432034	10431973	Yes	10431973	10431975
AT1G29800		non-targets	chr1	+	1	10435329-10435381	10435339	Yes	10435334	10435336
AT1G29810		non-targets	chr1	-	1	10435283-10435412	10435298	Yes	10435288	10435400
AT1G29820		permissive	chr1	+	1	10440714-10440798	10440714	No	10440714	10440714
AT1G29840		non-targets	chr1	-	1	10445610-10445709	10445761	Yes	10445610	10445617
AT1G29850		NA	chr1	+	1	10449760-10449967	10449863	NA	NA	NA
AT1G29880		stringent	chr1	-	1	10459477-10459573	10459539	No	10459508	10459508
AT1G29890	RWA4	non-targets	chr1	+	1	10467221-10467389	10467383	No	10467307	10467307
AT1G29900	CARB|VEN3	permissive	chr1	+	1	10472048-10472238	10472274	Yes	10472085	10472237
AT1G29930	AB140|CAB1|CAB140|LHCB1.3	NA	chr1	+	1	10478994-10479089	10479003	NA	NA	NA
AT1G29950		non-targets	chr1	+	1	10494471-10494552	10494555	Yes	10494528	10494531
AT1G29960		non-targets	chr1	+	1	10496130-10496162	10496161	NA	10496161	NA
AT1G29970	RPL18AA	permissive	chr1	-	2	10498185-10498363, 10499663-10499780	10498328, 10499782	Yes	10499681	10499723
AT1G29980		non-targets	chr1	-	1	10503279-10503305	10503304	NA	NA	10503279
AT1G29990	PFD6	stringent	chr1	+	1	10508996-10509159	10509088	No	10509044	10509044
AT1G30000	MNS3	non-targets	chr1	-	1	10509150-10509288	10509239	Yes	10509219	10509217
AT1G30040	ATGA2OX2|GA2OX2	non-targets	chr1	+	1	10539650-10539847	10539846	NA	NA	10539846
AT1G30070		non-targets	chr1	-	1	10546446-10546706	10546700	Yes	10546593	10546659
AT1G30080		non-targets	chr1	-	2	10550899-10551053, 10551611-10551653	10551055, 10551652	No	10550946	10550946
AT1G30090		non-targets	chr1	-	1	10559425-10559593	10559621	Yes	10559562	10559523
AT1G30110	ATNUDX25|NUDX25	non-targets	chr1	+	1	10583996-10584106	10584121	Yes	10584067	10584096
AT1G30120	PDH-E1 BETA	stringent	chr1	-	1	10584091-10584223	10584224	No	10584162	10584162
AT1G30130		non-targets	chr1	+	3	10589595-10590022, 10590078-10590099, 10590354-10590426	10589611, 10590098, 10590425	No	10589610	10589610
AT1G30135	JAZ8|TIFY5A	NA	chr1	+	1	10597165-10597416	10597263	NA	NA	NA
AT1G30140		non-targets	chr1	+	1	10599738-10599739	10599738	NA	10599738	NA
AT1G30200		permissive	chr1	+	1	10627043-10627136	10627117	Yes	10627098	10627082
AT1G30230	eEF-1Bb1|EF1Bb	stringent	chr1	+	1	10640617-10640939	10640699	No	10640674	10640674
AT1G30260		non-targets	chr1	+	1	10651516-10651633	10651632	NA	10651632	NA
AT1G30270	ATCIPK23|CIPK23|LKS1|PKS17|SnRK3.23	non-targets	chr1	+	1	10658712-10658983	10658801	Yes	10658768	10658767
AT1G30280		non-targets	chr1	-	1	10662635-10662695	10662686	Yes	10662635	10662646
AT1G30290		non-targets	chr1	-	1	10670235-10670242	10670241	NA	10670235	NA
AT1G30300		non-targets	chr1	+	1	10675330-10675481	10675518	Yes	10675371	10675480
AT1G30320		non-targets	chr1	+	2	10680581-10680583, 10682921-10683282	10680581, 10683033	No	10682981	10682981
AT1G30330	ARF6	non-targets	chr1	-	1	10685894-10685915	10685897	Yes	10685896	10685897
AT1G30360	ERD4	non-targets	chr1	+	2	10716684-10716690, 10718915-10719010	10716692, 10718999	No	10718976	10718976
AT1G30380	PSAK	stringent	chr1	+	1	10723080-10723139	10723171	Yes	10723138	10723118
AT1G30400	ABCC1|ATABCC1|ATMRP1|EST1|MRP1	stringent	chr1	+	1	10737800-10738110	10737937	Yes	10737844	10737846
AT1G30410	ABCC12|ATMRP13|MRP13	non-targets	chr1	+	1	10747512-10747515	10747514	No	10747514	10747514
AT1G30440		non-targets	chr1	+	1	10762346-10762507	10762386	Yes	10762354	10762385
AT1G30450	ATCCC1|CCC1|HAP5	permissive	chr1	+	2	10769225-10769331, 10769387-10769628	10769225, 10769560	Yes	10769492	10769495
AT1G30460	ATCPSF30|CPSF30	permissive	chr1	-	2	10771261-10771346, 10774285-10774308	10771345, 10774307	Yes	10774303	10771261
AT1G30470		non-targets	chr1	+	1	10786542-10786711	10786710	No	10786645	10786645
AT1G30475		non-targets	chr1	-	1	10788225-10788351	10788368	Yes	10788251	10788225
AT1G30480	DRT111	permissive	chr1	+	1	10792528-10792688	10792745	Yes	10792687	10792596
AT1G30490	ATHB9|PHV	permissive	chr1	-	1	10796136-10796230	10796270	Yes	10796140	10796136
AT1G30510	ATRFNR2|RFNR2	non-targets	chr1	-	1	10806940-10807087	10806991	No	10806985	10806985
AT1G30540		non-targets	chr1	-	1	10816630-10816849	10816941	No	10816774	10816774
AT1G30545		non-targets	chr1	-	1	10819514-10819631	10819630	NA	10819514	NA
AT1G30550		permissive	chr1	-	1	10822162-10822170	10822169	Yes	10822162	10822168
AT1G30570	HERK2	non-targets	chr1	+	1	10831606-10831644	10831623	Yes	10831611	10831623
AT1G30580		stringent	chr1	-	1	10831656-10831787	10831785	No	10831726	10831726
AT1G30620	HSR8|MUR4|UXE1	non-targets	chr1	+	1	10858171-10858265	10858289	Yes	10858235	10858236
AT1G30630		stringent	chr1	-	1	10858259-10858425	10858410	No	10858348	10858348
AT1G30640		non-targets	chr1	+	2	10860938-10860950, 10864831-10865075	10860949, 10865061	Yes	10864970	10864976
AT1G30650	AR411|ATWRKY14|WRKY14	non-targets	chr1	+	1	10871122-10871280	10871363	Yes	10871250	10871247
AT1G30680		permissive	chr1	+	1	10886483-10886495	10886494	Yes	10886493	10886494
AT1G30690		non-targets	chr1	+	1	10890176-10890347	10890265	Yes	10890228	10890229
AT1G30700		non-targets	chr1	+	2	10893445-10893481, 10894455-10894735	10893480, 10894550	Yes	10894477	10894534
AT1G30720		non-targets	chr1	+	1	10899849-10899967	10899921	Yes	10899921	10899959
AT1G30730		non-targets	chr1	+	1	10902479-10902756	10902547	No	10902545	10902545
AT1G30750		non-targets	chr1	-	1	10904710-10904938	10905001	No	10904904	10904904
AT1G30810	JMJ18	non-targets	chr1	-	1	10937894-10937905	10937894	NA	10937894	NA
AT1G30820		permissive	chr1	-	1	10944914-10945102	10945257	Yes	10944936	10944914
AT1G30825	ARPC2A|DIS2	non-targets	chr1	+	1	10963093-10963251	10963331	Yes	10963177	10963250
AT1G30845		non-targets	chr1	+	1	10980600-10980695	10980686	Yes	10980686	10980617
AT1G30850	RSH4	non-targets	chr1	+	1	10986094-10986276	10986275	Yes	10986169	10986275
AT1G30870		non-targets	chr1	+	1	10992975-10993099	10993053	No	10993022	10993022
AT1G30880		stringent	chr1	-	1	10993148-10993260	10993252	Yes	10993216	10993214
AT1G30890		non-targets	chr1	+	1	10996068-10996231	10996178	No	10996132	10996132
AT1G30900	BP80-3;3|VSR3;3|VSR6	non-targets	chr1	+	1	11000636-11000842	11000766	No	11000715	11000715
AT1G30910		non-targets	chr1	+	1	11002823-11002995	11003007	Yes	11002928	11002947
AT1G30970	SUF4	non-targets	chr1	-	1	11040288-11040393	11040317	No	11040303	11040303
AT1G30990		non-targets	chr1	+	1	11053178-11053275	11053230	No	11053205	11053205
AT1G31010	OSB4	non-targets	chr1	-	1	11054751-11054754	11054753	No	11054751	11054751
AT1G31020	ATO2|TO2	non-targets	chr1	+	1	11058828-11058965	11058961	No	11058904	11058904
AT1G31050		non-targets	chr1	-	2	11075414-11075563, 11078706-11078790	11075478, 11078778	Yes	11075476	11075414
AT1G31070	GlcNAc1pUT1	non-targets	chr1	+	1	11088490-11088591	11088615	No	11088557	11088557
AT1G31120	KUP10	non-targets	chr1	-	1	11104260-11104351	11104428	No	11104260	11104260
AT1G31130		permissive	chr1	-	1	11114699-11114836	11114793	No	11114761	11114761
AT1G31160	HINT 2	permissive	chr1	-	1	11122655-11122729	11122677	Yes	11122678	11122657
AT1G31170	ATSRX|SRX	NA	chr1	+	1	11134324-11134414	11134440	NA	NA	NA
AT1G31175		non-targets	chr1	+	1	11142589-11142717	11142716	Yes	11142716	11142592
AT1G31180	ATIMD3|IMD3|IPMDH1	permissive	chr1	-	1	11142729-11142766	11142729	Yes	11142729	11142734
AT1G31220		non-targets	chr1	+	1	11158640-11158670	11158671	Yes	11158666	11158669
AT1G31230	AK-HSDH|AK-HSDH I	non-targets	chr1	-	1	11158609-11158625	11158616	Yes	11158616	11158617
AT1G31258		permissive	chr1	+	1	11171901-11172027	11172098	Yes	11172010	11172011
AT1G31280	AGO2|AtAGO2	non-targets	chr1	+	1	11185312-11185396	11185443	Yes	11185391	11185395
AT1G31300		stringent	chr1	+	1	11196136-11196312	11196210	Yes	11196196	11196152
AT1G31330	PSAF	NA	chr1	-	1	11214809-11214927	11214948	NA	NA	NA
AT1G31340	ATRUB1|NEDD8|RUB1	stringent	chr1	-	1	11217848-11217956	11217958	No	11217910	11217910
AT1G31350	KUF1	non-targets	chr1	-	1	11221306-11221408	11221374	No	11221341	11221341
AT1G31360	ATRECQ2|MED34|RECQL2	non-targets	chr1	+	1	11237515-11237545	11237544	Yes	11237532	11237544
AT1G31410		non-targets	chr1	-	1	11246893-11247009	11247008	Yes	11246956	11246893
AT1G31420	FEI1	stringent	chr1	+	1	11253816-11253883	11253896	No	11253873	11253873
AT1G31440		non-targets	chr1	-	1	11255846-11255945	11255854	Yes	11255852	11255849
AT1G31470	NFD4	non-targets	chr1	-	1	11262830-11262881	11262923	Yes	11262835	11262830
AT1G31480	SGR2	non-targets	chr1	+	1	11271698-11271703	11271703	Yes	11271700	11271702
AT1G31500		non-targets	chr1	-	1	11273601-11273753	11273782	Yes	11273601	11273681
AT1G31600	AtTRM9|TRM9	non-targets	chr1	-	2	11313106-11313149, 11313198-11313199	11313148, 11313198	Yes	11313106	11313198
AT1G31660	atENP1|ENP1	non-targets	chr1	-	1	11330958-11330996	11330960	Yes	11330958	11330960
AT1G31710		permissive	chr1	+	1	11355441-11355486	11355441	NA	11355441	NA
AT1G31720		non-targets	chr1	+	1	11356947-11357166	11357165	NA	NA	11357165
AT1G31730		permissive	chr1	+	1	11364237-11364288	11364260	No	11364252	11364252
AT1G31750		NA	chr1	-	1	11370539-11370681	11370682	NA	NA	NA
AT1G31770	ABCG14	non-targets	chr1	-	1	11374804-11374989	11375016	No	11374982	11374982
AT1G31772		NA	chr1	+	2	11379655-11379659, 11379832-11380033	11379658, 11379910	NA	NA	NA
AT1G31780		permissive	chr1	+	1	11394682-11394849	11394758	No	11394721	11394721
AT1G31810	AFH14	non-targets	chr1	-	1	11399605-11399694	11399693	Yes	11399610	11399605
AT1G31812	ACBP|ACBP6	stringent	chr1	-	1	11410661-11411029	11411306	No	11410985	11410985
AT1G31817	NFD3	permissive	chr1	-	1	11414717-11414820	11414804	Yes	11414761	11414760
AT1G31830	PUT2	non-targets	chr1	-	1	11418591-11418746	11418755	No	11418624	11418624
AT1G31835		non-targets	chr1	-	1	11423022-11423094	11423093	Yes	11423022	11423068
AT1G31850		permissive	chr1	+	1	11433558-11433772	11433736	Yes	11433654	11433692
AT1G31860	AT-IE|HISN2	non-targets	chr1	-	1	11434106-11434146	11434113	Yes	11434108	11434110
AT1G31870		non-targets	chr1	+	1	11440014-11440208	11440176	No	11440108	11440108
AT1G31885	NIP3;1	non-targets	chr1	+	1	11452040-11452133	11452132	Yes	11452132	11452043
AT1G31910		stringent	chr1	+	2	11458316-11458412, 11461764-11461833	11458448, 11461823	No	11461817	11461817
AT1G31930	XLG3	non-targets	chr1	+	1	11469064-11469188	11469288	No	11469187	11469187
AT1G31935		NA	chr1	+	2	11469792-11469793, 11469864-11469993	11469792, 11469906	NA	NA	NA
AT1G31940		non-targets	chr1	-	1	11469986-11470128	11470124	Yes	11470011	11470057
AT1G31950		non-targets	chr1	+	1	11478236-11478410	11478486	Yes	11478369	11478367
AT1G32050	AtSCAMP5|SCAMP5	stringent	chr1	+	1	11531185-11531318	11531247	No	11531222	11531222
AT1G32060	PRK	NA	chr1	+	1	11534607-11534647	11534646	NA	NA	NA
AT1G32070	ATNSI|NSI	non-targets	chr1	-	1	11534589-11534760	11534821	Yes	11534683	11534589
AT1G32090		non-targets	chr1	-	1	11539928-11540118	11540118	Yes	11540068	11540056
AT1G32100	ATPRR1|PRR1	non-targets	chr1	-	1	11546286-11546435	11546423	No	11546366	11546366
AT1G32127		non-targets	chr1	+	1	11558642-11558802	11558741	No	11558700	11558700
AT1G32130	ATIWS1|HNI9|IWS1	stringent	chr1	-	1	11558795-11558935	11558956	No	11558877	11558877
AT1G32150	AtbZIP68|bZIP68	non-targets	chr1	+	1	11568508-11568634	11568529	Yes	11568529	11568511
AT1G32160		non-targets	chr1	+	1	11570331-11570386	11570385	Yes	11570385	11570353
AT1G32190		non-targets	chr1	-	1	11592954-11592976	11592959	Yes	11592959	11592954
AT1G32200	ACT1|ATS1	NA	chr1	-	1	11601792-11601793	11601792	NA	NA	NA
AT1G32210	ATDAD1	stringent	chr1	-	1	11605701-11605942	11606013	Yes	11605858	11605857
AT1G32220		non-targets	chr1	+	1	11609711-11609730	11609729	NA	NA	11609729
AT1G32230	ATP8|AtRCD1|CEO|CEO1|RCD1	stringent	chr1	+	4	11613066-11613184, 11616109-11616220, 11617295-11617324, 11617570-11617802	11613119, 11616214, 11617343, 11617750	No	11616176	11616176
AT1G32240	KAN2	non-targets	chr1	-	1	11625674-11625775	11625774	NA	11625674	NA
AT1G32260		non-targets	chr1	-	1	11640570-11640594	11640596	Yes	11640581	11640589
AT1G32310	SAMBA	stringent	chr1	+	1	11654712-11654913	11654755	Yes	11654728	11654745
AT1G32330	ATHSFA1D|HSFA1D	permissive	chr1	-	1	11656923-11657086	11657012	Yes	11657005	11656989
AT1G32340	NHL8	non-targets	chr1	-	1	11663070-11663349	11663290	Yes	11663070	11663290
AT1G32360		non-targets	chr1	+	2	11673248-11673259, 11675279-11675368	11673258, 11675342	Yes	11675335	11675338
AT1G32370	TOM2B|TTM1	non-targets	chr1	+	2	11677720-11677775, 11678358-11678571	11677774, 11678401	Yes	11678394	11678395
AT1G32380	PRS2	permissive	chr1	+	1	11684403-11684495	11684505	Yes	11684416	11684494
AT1G32400	TOM2A	stringent	chr1	-	1	11689103-11689186	11689113	No	11689108	11689108
AT1G32410		permissive	chr1	+	1	11695500-11695565	11695598	Yes	11695553	11695551
AT1G32440	PKp3	stringent	chr1	+	1	11715073-11715174	11715110	No	11715107	11715107
AT1G32450	NRT1.5	permissive	chr1	-	2	11715230-11715261, 11719810-11719811	11715230, 11719810	Yes	11719810	11715230
AT1G32460		NA	chr1	+	1	11739234-11739345	11739307	NA	NA	NA
AT1G32490	EMB2733|ESP3	permissive	chr1	-	2	11742052-11742221, 11747363-11747370	11742220, 11747363	Yes	11747363	11742052
AT1G32500	ABCI7|ATNAP6|NAP6	non-targets	chr1	-	1	11749767-11749930	11749893	Yes	11749871	11749822
AT1G32520		non-targets	chr1	-	1	11758201-11758391	11758390	Yes	11758264	11758201
AT1G32530		non-targets	chr1	-	2	11759346-11759536, 11759938-11759939	11759534, 11759938	Yes	11759465	11759467
AT1G32550	FdC2	NA	chr1	-	1	11771765-11771794	11771772	NA	NA	NA
AT1G32560	AtLEA4-1|LEA4-1	NA	chr1	+	1	11775157-11775306	11775198	NA	NA	NA
AT1G32580		permissive	chr1	+	1	11785540-11785664	11785629	No	11785611	11785611
AT1G32640	ATMYC2|JAI1|JIN1|MYC2|RD22BP1|ZBF1	non-targets	chr1	-	1	11798787-11798880	11798836	Yes	11798815	11798814
AT1G32690		non-targets	chr1	-	1	11820856-11820959	11820911	Yes	11820871	11820864
AT1G32700		non-targets	chr1	+	1	11829721-11829858	11829779	Yes	11829753	11829758
AT1G32730		non-targets	chr1	+	1	11843170-11843356	11843435	Yes	11843256	11843355
AT1G32750	GTD1|HAC13|HAF01|HAF1|TAF1	non-targets	chr1	-	1	11846131-11846179	11846178	NA	NA	11846131
AT1G32760		non-targets	chr1	+	1	11859366-11859393	11859396	Yes	11859382	11859392
AT1G32790	CID11	stringent	chr1	-	1	11874787-11875015	11875063	No	11874933	11874933
AT1G32810		permissive	chr1	+	2	11885634-11885639, 11885959-11886047	11885638, 11886006	Yes	11885959	11886046
AT1G32860		non-targets	chr1	-	1	11907067-11907142	11907181	No	11907067	11907067
AT1G32870	ANAC013|ANAC13|NAC13	non-targets	chr1	+	1	11913831-11913999	11914001	Yes	11913998	11913885
AT1G32920		non-targets	chr1	+	1	11929240-11929430	11929302	No	11929275	11929275
AT1G32928		non-targets	chr1	+	1	11931662-11931873	11931720	Yes	11931695	11931701
AT1G32930	AtGALT31A|GALT31A	non-targets	chr1	-	1	11931837-11931885	11931856	Yes	11931844	11931846
AT1G32940	ATSBT3.5|SBT3.5	non-targets	chr1	+	1	11940895-11940961	11940960	Yes	11940960	11940932
AT1G32950		non-targets	chr1	+	1	11944689-11944822	11944821	NA	NA	11944821
AT1G32990	PRPL11	NA	chr1	+	1	11957247-11957389	11957302	NA	NA	NA
AT1G33040	NACA5	NA	chr1	+	1	11967772-11967862	11967842	NA	NA	NA
AT1G33050		permissive	chr1	-	1	11967810-11967880	11967869	Yes	11967837	11967859
AT1G33055		non-targets	chr1	-	1	11972181-11972241	11972240	Yes	11972218	11972181
AT1G33090		non-targets	chr1	+	1	11996622-11996663	11996662	NA	NA	11996662
AT1G33110		permissive	chr1	+	2	12005415-12005512, 12008715-12008872	12005483, 12008741	Yes	12008729	12008730
AT1G33120		stringent	chr1	+	1	12012320-12012535	12012407	No	12012365	12012365
AT1G33140	PGY2	stringent	chr1	+	1	12024627-12024956	12024771	Yes	12024697	12024708
AT1G33230		permissive	chr1	+	1	12049960-12050182	12050113	Yes	12050041	12050039
AT1G33240	AT-GTL1|ATGTL1|GTL1	non-targets	chr1	-	2	12051460-12051571, 12051795-12051809	12051475, 12051795	No	12051471	12051471
AT1G33250		permissive	chr1	-	1	12057223-12057392	12057302	Yes	12057249	12057278
AT1G33265		permissive	chr1	+	1	12067958-12068088	12068072	Yes	12068072	12068009
AT1G33270		non-targets	chr1	-	1	12068070-12068192	12068189	Yes	12068083	12068070
AT1G33290		permissive	chr1	+	1	12076091-12076106	12076105	NA	NA	12076105
AT1G33330		permissive	chr1	+	1	12086451-12086521	12086569	Yes	12086514	12086513
AT1G33360		permissive	chr1	+	1	12095963-12096054	12096084	No	12096024	12096024
AT1G33410	ATNUP160|NUP160|SAR1	permissive	chr1	-	1	12109573-12109621	12109620	Yes	12109573	12109589
AT1G33470		permissive	chr1	+	1	12147093-12147210	12147250	No	12147173	12147173
AT1G33480		non-targets	chr1	-	1	12148512-12148652	12148712	Yes	12148622	12148512
AT1G33490		permissive	chr1	-	1	12150673-12150777	12150695	No	12150689	12150689
AT1G33520	MOS2	non-targets	chr1	-	1	12157121-12157187	12157186	Yes	12157155	12157186
AT1G33590		non-targets	chr1	+	1	12179279-12179506	12179508	No	12179394	12179394
AT1G33600		non-targets	chr1	+	2	12182288-12182306, 12182345-12182363	12182305, 12182362	Yes	12182362	12182305
AT1G33610		non-targets	chr1	+	1	12190418-12190460	12190459	NA	12190459	NA
AT1G33612		non-targets	chr1	+	1	12192778-12192878	12192778	No	12192778	12192778
AT1G33680		permissive	chr1	+	1	12208562-12208586	12208607	No	12208585	12208585
AT1G33700		non-targets	chr1	-	1	12208651-12208708	12208698	Yes	12208679	12208673
AT1G33750		non-targets	chr1	+	1	12236461-12236577	12236576	Yes	12236576	12236464
AT1G33780		non-targets	chr1	-	1	12244583-12244680	12244737	No	12244661	12244661
AT1G33800	AtGXMT1|GXM1|GXMT1	non-targets	chr1	+	1	12262604-12262740	12262676	Yes	12262716	12262610
AT1G33810		NA	chr1	+	1	12266764-12266945	12266776	NA	NA	NA
AT1G33980	ATUPF3|UPF3	non-targets	chr1	+	1	12354948-12355076	12354987	Yes	12354982	12354953
AT1G33990	ATMES14|MES14	stringent	chr1	+	1	12358001-12358017	12358006	No	12358006	12358006
AT1G34000	OHP2	NA	chr1	-	1	12357925-12358032	12358031	NA	NA	NA
AT1G34010		permissive	chr1	-	1	12359503-12359615	12359597	Yes	12359548	12359503
AT1G34020		permissive	chr1	+	1	12369094-12369194	12369258	No	12369192	12369192
AT1G34030		stringent	chr1	-	1	12370002-12370149	12370193	No	12370127	12370127
AT1G34040		non-targets	chr1	+	1	12376215-12376290	12376289	Yes	12376289	12376215
AT1G34065	SAMC2	non-targets	chr1	-	1	12398439-12398580	12398579	NA	12398439	NA
AT1G34120	AT5P1|AT5PTASE1|ATIP5PI|IP5PI	non-targets	chr1	+	1	12429608-12429739	12429749	Yes	12429691	12429689
AT1G34130	STT3B	permissive	chr1	+	1	12433093-12433199	12433163	Yes	12433127	12433162
AT1G34150		permissive	chr1	+	1	12439435-12439516	12439501	Yes	12439499	12439450
AT1G34190	anac017|NAC017	non-targets	chr1	+	1	12454050-12454093	12454108	Yes	12454081	12454085
AT1G34200		non-targets	chr1	+	1	12457368-12457434	12457433	Yes	12457389	12457433
AT1G34260	FAB1D	non-targets	chr1	+	2	12491369-12491383, 12492152-12492184	12491369, 12492188	No	12492170	12492170
AT1G34270		permissive	chr1	-	1	12492394-12492446	12492461	Yes	12492394	12492396
AT1G34300		non-targets	chr1	+	1	12506019-12506140	12506055	No	12506046	12506046
AT1G34320		non-targets	chr1	+	1	12524325-12524382	12524400	No	12524366	12524366
AT1G34350		permissive	chr1	+	1	12536016-12536172	12536168	No	12536107	12536107
AT1G34360		non-targets	chr1	+	1	12546152-12546273	12546294	Yes	12546196	12546272
AT1G34370	AtSTOP1|STOP1	non-targets	chr1	+	1	12552574-12552719	12552635	No	12552612	12552612
AT1G34418		NA	chr1	+	1	12582687-12582783	12582733	NA	NA	NA
AT1G34430	EMB3003	NA	chr1	-	1	12587742-12587901	12588019	NA	NA	NA
AT1G34470		permissive	chr1	+	1	12606951-12606993	12606992	Yes	12606992	12606973
AT1G34550	EMB2756	permissive	chr1	-	1	12646676-12646762	12646685	Yes	12646686	12646676
AT1G34570		non-targets	chr1	-	1	12655006-12655040	12655045	Yes	12655017	12655006
AT1G34630		permissive	chr1	+	1	12687584-12687656	12687705	Yes	12687651	12687639
AT1G34750		non-targets	chr1	-	2	12736001-12736138, 12736202-12736208	12736105, 12736207	Yes	12736070	12736068
AT1G34760	GF14 OMICRON|GRF11|RHS5	non-targets	chr1	-	1	12743815-12743876	12743900	Yes	12743815	12743841
AT1G34780	APRL4|ATAPRL4	non-targets	chr1	-	1	12748571-12748683	12748604	No	12748598	12748598
AT1G35160	14-3-3PHI|GF14 PHI|GRF4	stringent	chr1	+	1	12868716-12868868	12868840	No	12868780	12868780
AT1G35190		non-targets	chr1	+	1	12892768-12892919	12892943	Yes	12892875	12892870
AT1G35210		non-targets	chr1	-	1	12896605-12896711	12896655	NA	NA	12896655
AT1G35220		permissive	chr1	+	1	12914773-12914864	12914789	Yes	12914781	12914788
AT1G35260	MLP165	non-targets	chr1	-	1	12936762-12936962	12936934	No	12936859	12936859
AT1G35320		non-targets	chr1	-	3	12959154-12959180, 12959590-12959594, 12960199-12960276	12959179, 12959593, 12960205	NA	12960199	NA
AT1G35340		non-targets	chr1	+	1	12979861-12979945	12979923	Yes	12979944	12979861
AT1G35430		non-targets	chr1	-	1	13030537-13030592	13030566	No	13030552	13030552
AT1G35460	FBH1	NA	chr1	+	1	13042096-13042141	13042105	NA	NA	NA
AT1G35470	RanBPM	non-targets	chr1	-	1	13051413-13051501	13051582	Yes	13051413	13051416
AT1G35510		non-targets	chr1	+	1	13074821-13074962	13074885	Yes	13074821	13074885
AT1G35580	A/N-InvG|CINV1	stringent	chr1	-	1	13122212-13122329	13122318	No	13122273	13122273
AT1G35620	ATPDI8|ATPDIL5-2|PDI8|PDIL5-2	non-targets	chr1	+	1	13158409-13158559	13158438	No	13158433	13158433
AT1G35660		non-targets	chr1	+	1	13197917-13197990	13198005	No	13197989	13197989
AT1G35670	ATCDPK2|ATCPK11|CDPK2|CPK11	permissive	chr1	+	1	13208162-13208302	13208305	No	13208250	13208250
AT1G35680	RPL21C	NA	chr1	+	1	13210355-13210415	13210434	NA	NA	NA
AT1G35720	ANN1|ANNAT1|AtANN1|ATOXY5|OXY5	permissive	chr1	+	1	13227105-13227311	13227213	No	13227160	13227160
AT1G35780		permissive	chr1	-	1	13277431-13277617	13277532	Yes	13277432	13277609
AT1G35910	TPPD	non-targets	chr1	-	1	13363003-13363052	13363060	Yes	13363028	13363034
AT1G36050		stringent	chr1	+	1	13453160-13453277	13453301	Yes	13453239	13453222
AT1G36060		non-targets	chr1	-	1	13454496-13454594	13454591	Yes	13454580	13454562
AT1G36070		non-targets	chr1	-	1	13466989-13467030	13467029	Yes	13466989	13467009
AT1G36160	ACC1|AT-ACC1|EMB22|GK|GSD1|PAS3|SFR3	stringent	chr1	+	1	13543894-13544012	13543944	No	13543930	13543930
AT1G36180	ACC2	non-targets	chr1	+	1	13558529-13558724	13558529	Yes	13558572	13558529
AT1G36280		non-targets	chr1	+	1	13642996-13643117	13643143	Yes	13643116	13643056
AT1G36310		permissive	chr1	+	1	13671009-13671156	13671153	No	13671119	13671119
AT1G36320		stringent	chr1	+	1	13674046-13674121	13674047	Yes	13674047	13674052
AT1G36370	SHM7	non-targets	chr1	-	1	13696041-13696139	13696061	No	13696051	13696051
AT1G36380		non-targets	chr1	+	1	13701535-13701636	13701715	No	13701629	13701629
AT1G36390		non-targets	chr1	-	1	13701605-13701699	13701725	Yes	13701671	13701605
AT1G36730		non-targets	chr1	-	1	13898249-13898490	13898649	No	13898449	13898449
AT1G36980		stringent	chr1	+	1	14026879-14026965	14026933	No	14026912	14026912
AT1G36990		non-targets	chr1	-	2	14027291-14027298, 14028128-14028130	14027296, 14028129	Yes	14027296	14027295
AT1G37130	ATNR2|B29|CHL3|NIA2|NIA2-1|NR|NR2	non-targets	chr1	+	1	14161763-14161936	14161916	No	14161847	14161847
AT1G38065		non-targets	chr1	-	1	14289447-14289655	14289740	Yes	14289584	14289601
AT1G38131		non-targets	chr1	-	1	14292933-14293141	14293226	Yes	14293070	14293087
AT1G41830	SKS6	non-targets	chr1	-	2	15603555-15603716, 15607011-15607118	15603675, 15607087	No	15603615	15603615
AT1G41880		stringent	chr1	-	1	15651025-15651187	15651255	No	15651141	15651141
AT1G42440		permissive	chr1	-	1	15895285-15895322	15895333	No	15895309	15895309
AT1G42470		non-targets	chr1	+	1	15935226-15935297	15935296	Yes	15935274	15935296
AT1G42480		permissive	chr1	+	1	15938810-15938974	15938898	Yes	15938858	15938862
AT1G42540	ATGLR3.3|GLR3.3	permissive	chr1	+	1	15976745-15976778	15976801	Yes	15976775	15976773
AT1G42960		stringent	chr1	+	1	16127183-16127331	16127236	No	16127210	16127210
AT1G42990	ATBZIP60|BZIP60	non-targets	chr1	-	2	16135754-16135958, 16136752-16136837	16135930, 16136836	Yes	16135885	16135883
AT1G43000		NA	chr1	+	1	16141820-16141863	16141862	NA	NA	NA
AT1G43020		non-targets	chr1	+	1	16157783-16158114	16158028	Yes	16157948	16157912
AT1G43040		non-targets	chr1	+	1	16184738-16184860	16184895	No	16184859	16184859
AT1G43130	LCV2	stringent	chr1	-	1	16228152-16228581	16228692	No	16228536	16228536
AT1G43160	RAP2.6	non-targets	chr1	+	1	16264685-16265020	16264750	No	16264722	16264722
AT1G43170	ARP1|emb2207|RP1|RPL3A	stringent	chr1	+	1	16268733-16268893	16268826	No	16268781	16268781
AT1G43190	PTB3	permissive	chr1	-	1	16275111-16275286	16275280	No	16275196	16275196
AT1G43560	Aty2|ty2	NA	chr1	-	1	16398096-16398261	16398212	NA	NA	NA
AT1G43580		permissive	chr1	-	1	16410509-16410560	16410557	Yes	16410544	16410539
AT1G43620	TT15|UGT80B1	permissive	chr1	-	1	16425345-16425484	16425464	No	16425431	16425431
AT1G43650	UMAMIT22	non-targets	chr1	-	1	16443641-16443767	16443728	Yes	16443684	16443708
AT1G43670	AtcFBP|FBP|FINS1	stringent	chr1	+	1	16470441-16470520	16470551	Yes	16470498	16470496
AT1G43690		permissive	chr1	+	1	16482750-16482926	16482830	Yes	16482799	16482797
AT1G43700	SUE3|VIP1	non-targets	chr1	+	1	16486132-16486244	16486341	Yes	16486236	16486240
AT1G43710	ATSDC1|EMB1075|SDC1	permissive	chr1	-	1	16486307-16486435	16486526	Yes	16486422	16486412
AT1G43790	TED6	non-targets	chr1	+	1	16576355-16576628	16576469	No	16576414	16576414
AT1G43850	SEU	non-targets	chr1	+	1	16621803-16621920	16621986	No	16621914	16621914
AT1G43860		permissive	chr1	-	1	16622058-16622142	16622211	Yes	16622112	16622126
AT1G43890	ATRAB-C1|ATRAB18|ATRABC1|RAB18|RAB18-1|RABC1	stringent	chr1	+	1	16648500-16648759	16648633	Yes	16648616	16648522
AT1G43910		non-targets	chr1	-	1	16655808-16655947	16655934	No	16655898	16655898
AT1G44000		NA	chr1	-	1	16708068-16708094	16708068	NA	NA	NA
AT1G44100	AAP5	non-targets	chr1	-	1	16764403-16764548	16764540	Yes	16764404	16764534
AT1G44170	ALDH3H1|ALDH4	non-targets	chr1	-	1	16796395-16796487	16796441	No	16796418	16796418
AT1G44318	hemb2	non-targets	chr1	+	1	16834059-16834081	16834080	NA	16834080	NA
AT1G44350	ILL6	non-targets	chr1	-	3	16834430-16834676, 16835571-16835580, 16837346-16837519	16834782, 16835579, 16837518	Yes	16834570	16834627
AT1G44446	ATCAO|CAO|CH1	NA	chr1	-	1	16848316-16848385	16848405	NA	NA	NA
AT1G44575	CP22|NPQ4|PSBS	stringent	chr1	+	1	16873276-16873359	16873357	Yes	16873320	16873337
AT1G44608		non-targets	chr1	-	1	16875073-16875202	16875157	No	16875122	16875122
AT1G44750	ATPUP11|PUP11	non-targets	chr1	+	1	16895282-16895436	16895334	Yes	16895372	16895300
AT1G44760		non-targets	chr1	-	1	16896742-16896790	16896789	Yes	16896745	16896742
AT1G44770		NA	chr1	-	1	16907538-16907672	16907658	NA	NA	NA
AT1G44790		permissive	chr1	-	1	16912168-16912247	16912238	Yes	16912238	16912168
AT1G44800	SIAR1|UMAMIT18	non-targets	chr1	-	2	16914006-16914173, 16916429-16916433	16914164, 16916429	No	16914115	16914115
AT1G44810		non-targets	chr1	+	1	16924714-16924797	16924799	Yes	16924754	16924796
[truncated: 10,554 more rows]

## Sheet: Genes with >1 PAC
Gene ID	Gene name	ECT2/3 target status	Chromosome	Strand	Dominant PAC differs	Dominant PAC ect2-1 ECT2-mCherry	Dominant PAC te234 ECT2W464A-mCherry	Poly(A) peak differs	Poly(A) peak ect2-1 ECT2-mCherry	Poly(A) peak te234 ECT2W464A-mCherry
AT1G01020	ARV1	permissive	chr1	-	No	6811-6812	6811-6812	No	6811	6811
AT1G01140	CIPK9|PKS6|SnRK3.12	non-targets	chr1	-	Yes	64298-64299	64166-64167	Yes	64298	64166
AT1G01210		permissive	chr1	+	No	89761-89762	89743-89744	Yes	89761	89743
AT1G01260	JAM2	non-targets	chr1	+	No	111599-111600	111601-111602	Yes	111599	111601
AT1G01510	AN|DOQ	permissive	chr1	+	No	190156-190157	190033-190034	Yes	190156	190033
AT1G01990		non-targets	chr1	-	No	343234-343235	343266-343267	Yes	343234	343266
AT1G02090	ATCSN7|COP15|CSN7|FUS5	permissive	chr1	-	No	387327-387328	387327-387328	No	387327	387327
AT1G02340	FBI1|HFR1|REP1|RSF1	non-targets	chr1	-	No	465769-465770	465723-465724	Yes	465769	465723
AT1G02400	ATGA2OX4|ATGA2OX6|DTA1|GA2OX6	non-targets	chr1	+	No	489539-489540	489539-489540	No	489539	489539
AT1G02720	GATL5	non-targets	chr1	+	No	594224-594225	594265-594266	Yes	594224	594265
AT1G02816		non-targets	chr1	+	No	622308-622309	622301-622302	Yes	622308	622301
AT1G02890		non-targets	chr1	-	No	645101-645102	645099-645100	Yes	645101	645099
AT1G03365		non-targets	chr1	+	Yes	830293-830294	827999-828000	Yes	830293	827999
AT1G03610		non-targets	chr1	+	No	902894-902895	902916-902917	Yes	902894	902916
AT1G03740		permissive	chr1	+	No	937042-937043	936982-936983	Yes	937042	936982
AT1G03850	ATGRXS13|GRXS13	non-targets	chr1	-	No	977075-977076	977135-977136	Yes	977075	977135
AT1G03950	VPS2.3	permissive	chr1	-	No	1011235-1011236	1011235-1011236	No	1011235	1011235
AT1G04160	ATXIB|XI-8|XI-B|XIB	permissive	chr1	+	No	1096462-1096463	1096501-1096502	Yes	1096462	1096501
AT1G04250	AXR3|IAA17	stringent	chr1	+	No	1138567-1138568	1138567-1138568	No	1138567	1138567
AT1G04300		permissive	chr1	-	No	1148586-1148587	1148658-1148659	Yes	1148586	1148658
AT1G04555		non-targets	chr1	+	No	1243299-1243300	1243299-1243300	No	1243299	1243299
AT1G04610	YUC3	non-targets	chr1	+	No	1281341-1281342	1281351-1281352	Yes	1281341	1281351
AT1G04680		non-targets	chr1	-	No	1303667-1303668	1303678-1303679	Yes	1303667	1303678
AT1G04700		non-targets	chr1	+	No	1320918-1320919	1320890-1320891	Yes	1320918	1320890
AT1G04780		non-targets	chr1	-	No	1340645-1340646	1340647-1340648	Yes	1340645	1340647
AT1G05000	AtPFA-DSP1|PFA-DSP1	permissive	chr1	+	Yes	1428781-1428782	1428530-1428531	Yes	1428781	1428530
AT1G05260	RCI3|RCI3A	non-targets	chr1	+	No	1531433-1531434	1531433-1531434	No	1531433	1531433
AT1G05280		permissive	chr1	-	Yes	1534946-1534947	1535418-1535419	Yes	1534946	1535418
AT1G05560	UGT1|UGT75B1	non-targets	chr1	-	No	1645519-1645520	1645573-1645574	Yes	1645519	1645573
AT1G05650		non-targets	chr1	-	No	1690122-1690123	1690122-1690123	No	1690122	1690122
AT1G05660		non-targets	chr1	-	No	1694142-1694143	1694142-1694143	No	1694142	1694142
AT1G05805		non-targets	chr1	+	No	1747691-1747692	1747691-1747692	No	1747691	1747691
AT1G05830	ATX2|SDG30	non-targets	chr1	+	Yes	1757258-1757259	1761816-1761817	Yes	1757258	1761816
AT1G05860		non-targets	chr1	+	No	1771310-1771311	1771311-1771312	Yes	1771310	1771311
AT1G05870		non-targets	chr1	-	No	1772215-1772216	1772236-1772237	Yes	1772215	1772236
AT1G05890	ARI5|ATARI5	permissive	chr1	+	No	1781859-1781860	1781859-1781860	No	1781859	1781859
AT1G06200		permissive	chr1	-	No	1894399-1894400	1894401-1894402	Yes	1894399	1894401
AT1G06230	GTE4	permissive	chr1	+	No	1910849-1910850	1910852-1910853	Yes	1910849	1910852
AT1G06620		non-targets	chr1	+	No	2027241-2027242	2027282-2027283	Yes	2027241	2027282
AT1G06700		stringent	chr1	-	No	2052483-2052484	2052482-2052483	Yes	2052483	2052482
AT1G06800	PLA-I{gamma}1	non-targets	chr1	-	No	2089402-2089403	2089402-2089403	No	2089402	2089402
AT1G06890		permissive	chr1	-	No	2111670-2111671	2111670-2111671	No	2111670	2111670
AT1G07090	LSH6	non-targets	chr1	-	Yes	2174812-2174813	2173932-2173933	Yes	2174812	2173932
AT1G07175		non-targets	chr1	+	No	2202892-2202893	2202988-2202989	Yes	2202892	2202988
AT1G07902		non-targets	chr1	+	No	2445126-2445127	2445263-2445264	Yes	2445126	2445263
AT1G08230		non-targets	chr1	-	No	2586083-2586084	2586125-2586126	Yes	2586083	2586125
AT1G08580		permissive	chr1	-	Yes	2715477-2715478	2715146-2715147	Yes	2715477	2715146
AT1G08620	PKDM7D	permissive	chr1	+	No	2743873-2743874	2743853-2743854	Yes	2743873	2743853
AT1G08760		non-targets	chr1	+	No	2808600-2808601	2808598-2808599	Yes	2808600	2808598
AT1G08800		non-targets	chr1	-	No	2813062-2813063	2813062-2813063	No	2813062	2813062
AT1G08970	HAP5C|NF-YC9	permissive	chr1	+	No	2884246-2884247	2884246-2884247	No	2884246	2884246
AT1G09210	AtCRT1b|CRT1b	stringent	chr1	-	No	2973033-2973034	2973033-2973034	No	2973033	2973033
AT1G09570	FHY2|FRE1|HY8|PHYA	stringent	chr1	-	No	3095255-3095256	3095317-3095318	Yes	3095255	3095317
AT1G09770	ATCDC5|ATMYBCDC5|CDC5	permissive	chr1	+	No	3165322-3165323	3165280-3165281	Yes	3165322	3165280
AT1G09932		non-targets	chr1	-	Yes	3230500-3230501	3230464-3230465	Yes	3230500	3230464
AT1G09995		non-targets	chr1	-	No	3262264-3262265	3262241-3262242	Yes	3262264	3262241
AT1G10410		permissive	chr1	-	No	3416699-3416700	3416699-3416700	No	3416699	3416699
AT1G10890		non-targets	chr1	+	No	3630754-3630755	3630754-3630755	No	3630754	3630754
AT1G11190	BFN1|ENDO1	non-targets	chr1	-	No	3750145-3750146	3750145-3750146	No	3750145	3750145
AT1G11260	ATSTP1|STP1	non-targets	chr1	+	No	3780270-3780271	3780270-3780271	No	3780270	3780270
AT1G11545	XTH8	non-targets	chr1	-	No	3878596-3878597	3878596-3878597	No	3878596	3878596
AT1G11840	ATGLX1|GLX1	stringent	chr1	+	No	3997723-3997724	3997783-3997784	Yes	3997723	3997783
AT1G11880		non-targets	chr1	-	Yes	4007648-4007649	4007651-4007652	Yes	4007648	4007651
AT1G12110	ATNRT1|B-1|CHL1|CHL1-1|NRT1|NRT1.1	non-targets	chr1	+	No	4109537-4109538	4109537-4109538	No	4109537	4109537
AT1G12650		permissive	chr1	+	No	4307844-4307845	4308011-4308012	Yes	4307844	4308011
AT1G12750	ATRBL6|RBL6	non-targets	chr1	-	Yes	4344940-4344941	4347951-4347952	Yes	4344940	4347951
AT1G13190		non-targets	chr1	+	No	4501549-4501550	4501549-4501550	No	4501549	4501549
AT1G13300	HRS1	non-targets	chr1	+	No	4558707-4558708	4558707-4558708	No	4558707	4558707
AT1G13350		non-targets	chr1	-	No	4572337-4572338	4572405-4572406	Yes	4572337	4572405
AT1G13390		non-targets	chr1	-	No	4592435-4592436	4592496-4592497	Yes	4592435	4592496
AT1G13590	ATPSK1|PSK1	permissive	chr1	+	No	4648739-4648740	4648739-4648740	No	4648739	4648739
AT1G14170		non-targets	chr1	-	No	4843234-4843235	4843234-4843235	No	4843234	4843234
AT1G14230		non-targets	chr1	+	No	4864041-4864042	4864065-4864066	Yes	4864041	4864065
AT1G14610	TWN2|VALRS	stringent	chr1	-	No	5008315-5008316	5008315-5008316	No	5008315	5008315
AT1G14685	ATBPC2|BBR/BPC2|BPC2	non-targets	chr1	+	No	5044227-5044228	5044075-5044076	Yes	5044227	5044075
AT1G14920	GAI|RGA2	non-targets	chr1	+	No	5151284-5151285	5151159-5151160	Yes	5151284	5151159
AT1G15230		non-targets	chr1	-	No	5242504-5242505	5242527-5242528	Yes	5242504	5242527
AT1G15240		non-targets	chr1	+	No	5245207-5245208	5245207-5245208	No	5245207	5245207
AT1G15400		permissive	chr1	-	No	5296273-5296274	5296273-5296274	No	5296273	5296273
AT1G15800		non-targets	chr1	-	No	5441082-5441083	5441079-5441080	Yes	5441082	5441079
AT1G15920		non-targets	chr1	+	Yes	5470861-5470862	5471075-5471076	Yes	5470861	5471075
AT1G15940		non-targets	chr1	+	No	5477856-5477857	5477856-5477857	No	5477856	5477856
AT1G16020		permissive	chr1	+	No	5501326-5501327	5501240-5501241	Yes	5501326	5501240
AT1G16170		permissive	chr1	-	No	5538743-5538744	5538719-5538720	Yes	5538743	5538719
AT1G16440	RSH3	non-targets	chr1	+	No	5617780-5617781	5617780-5617781	No	5617780	5617780
AT1G16680		non-targets	chr1	+	Yes	5705861-5705862	5702686-5702687	Yes	5705861	5702686
AT1G16900	EBS3	permissive	chr1	-	Yes	5779019-5779020	5779041-5779042	Yes	5779019	5779041
AT1G17270		non-targets	chr1	-	Yes	5909223-5909224	5908841-5908842	Yes	5909223	5908841
AT1G17420	ATLOX3|LOX3	non-targets	chr1	+	No	5981477-5981478	5981477-5981478	No	5981477	5981477
AT1G17745	PGDH	non-targets	chr1	+	No	6105176-6105177	6105176-6105177	No	6105176	6105176
AT1G18270		permissive	chr1	-	No	6283473-6283474	6283473-6283474	No	6283473	6283473
AT1G18390		non-targets	chr1	+	Yes	6330081-6330082	6326624-6326625	Yes	6330081	6326624
AT1G18470		non-targets	chr1	-	No	6356156-6356157	6356132-6356133	Yes	6356156	6356132
AT1G18500	IPMS1|MAML-4	permissive	chr1	+	No	6373038-6373039	6373041-6373042	Yes	6373038	6373041
AT1G18860	ATWRKY61|WRKY61	non-targets	chr1	+	No	6511399-6511400	6511397-6511398	Yes	6511399	6511397
AT1G19220	ARF11|ARF19|IAA22	non-targets	chr1	-	No	6628095-6628096	6628064-6628065	Yes	6628095	6628064
AT1G19396		non-targets	chr1	+	NA	6711786-6711787	6710392-6710393	Yes	6711786	6710392
AT1G19440	KCS4	non-targets	chr1	+	No	6730888-6730889	6730888-6730889	No	6730888	6730888
AT1G19710		non-targets	chr1	+	Yes	6816925-6816926	6816850-6816851	Yes	6816925	6816850
AT1G20550		non-targets	chr1	-	Yes	7115393-7115394	7115240-7115241	Yes	7115393	7115240
AT1G20670		non-targets	chr1	-	No	7164263-7164264	7164126-7164127	Yes	7164263	7164126
AT1G20970		non-targets	chr1	+	No	7319527-7319528	7319509-7319510	Yes	7319527	7319509
AT1G21090		non-targets	chr1	+	Yes	7386406-7386407	7386236-7386237	Yes	7386406	7386236
AT1G21310	ATEXT3|EXT3|RSH	non-targets	chr1	-	No	7453250-7453251	7453250-7453251	No	7453250	7453250
AT1G21730		non-targets	chr1	+	No	7636567-7636568	7636593-7636594	Yes	7636567	7636593
AT1G21880	LYM1|LYP2	permissive	chr1	+	No	7682642-7682643	7682635-7682636	Yes	7682642	7682635
AT1G21910	DREB26	non-targets	chr1	+	No	7697518-7697519	7697518-7697519	No	7697518	7697518
AT1G22020	SHM6	non-targets	chr1	+	No	7757538-7757539	7757336-7757337	Yes	7757538	7757336
AT1G22180		permissive	chr1	-	No	7828295-7828296	7828295-7828296	No	7828295	7828295
AT1G22190	RAP2.4	non-targets	chr1	+	Yes	7837279-7837280	7837148-7837149	Yes	7837279	7837148
AT1G22360	AtUGT85A2|UGT85A2	non-targets	chr1	-	No	7894906-7894907	7894906-7894907	No	7894906	7894906
AT1G22400	ATUGT85A1|UGT85A1	non-targets	chr1	-	No	7903698-7903699	7903775-7903776	Yes	7903698	7903775
AT1G22910		permissive	chr1	+	No	8108125-8108126	8108126-8108127	Yes	8108125	8108126
AT1G23020	ATFRO3|FRO3	non-targets	chr1	-	No	8150134-8150135	8150156-8150157	Yes	8150134	8150156
AT1G23060	MDP40	non-targets	chr1	-	No	8170771-8170772	8170746-8170747	Yes	8170771	8170746
AT1G23080	ATPIN7|PIN7	non-targets	chr1	-	No	8180590-8180591	8180603-8180604	Yes	8180590	8180603
AT1G23220		permissive	chr1	+	Yes	8244317-8244318	8244341-8244342	Yes	8244317	8244341
AT1G23390		non-targets	chr1	-	Yes	8309322-8309323	8309112-8309113	Yes	8309322	8309112
AT1G23440		permissive	chr1	+	No	8324233-8324234	8324233-8324234	No	8324233	8324233
AT1G23860	At-RSZ21|RSZ21|RSZP21|SRZ-21|SRZ21	permissive	chr1	-	No	8427716-8427717	8427820-8427821	Yes	8427716	8427820
AT1G23900	GAMMA-ADAPTIN 1|Gamma-ADR	permissive	chr1	+	No	8447518-8447519	8447518-8447519	No	8447518	8447518
AT1G24190	ATSIN3|SIN3|SNL3	non-targets	chr1	-	No	8563542-8563543	8563532-8563533	Yes	8563542	8563532
AT1G24300		non-targets	chr1	-	No	8614369-8614370	8614369-8614370	No	8614369	8614369
AT1G24460	TNO1	permissive	chr1	+	Yes	8667168-8667169	8672698-8672699	Yes	8667168	8672698
AT1G24560		non-targets	chr1	+	No	8705843-8705844	8705843-8705844	No	8705843	8705843
AT1G24706	AtTHO2|EMB2793|THO2	non-targets	chr1	+	No	8755574-8755575	8755572-8755573	Yes	8755574	8755572
AT1G24764	ATMAP70-2|MAP70-2	non-targets	chr1	-	No	8762180-8762181	8762175-8762176	Yes	8762180	8762175
AT1G24880	AtLpxC2|LpxC2	non-targets	chr1	+	No	8776041-8776042	8776041-8776042	No	8776041	8776041
AT1G25230		non-targets	chr1	-	No	8840416-8840417	8840416-8840417	No	8840416	8840416
AT1G25470	CRF12	non-targets	chr1	-	Yes	8944573-8944574	8944616-8944617	Yes	8944573	8944616
AT1G25530		permissive	chr1	-	No	8964678-8964679	8964636-8964637	Yes	8964678	8964636
AT1G25580	ANAC008|SOG1	permissive	chr1	-	No	8996767-8996768	8996767-8996768	No	8996767	8996767
AT1G26440	ATUPS5|UPS5	non-targets	chr1	-	No	9143956-9143957	9143978-9143979	Yes	9143956	9143978
AT1G26450		non-targets	chr1	-	No	9148715-9148716	9148715-9148716	No	9148715	9148715
AT1G26460		permissive	chr1	+	No	9154737-9154738	9154737-9154738	No	9154737	9154737
AT1G26970		non-targets	chr1	+	No	9359800-9359801	9359801-9359802	Yes	9359800	9359801
AT1G27210		non-targets	chr1	-	Yes	9457947-9457948	9455307-9455308	Yes	9457947	9455307
AT1G27330		stringent	chr1	+	No	9494052-9494053	9494052-9494053	No	9494052	9494052
AT1G28060		non-targets	chr1	+	No	9782596-9782597	9782619-9782620	Yes	9782596	9782619
AT1G28090		permissive	chr1	+	Yes	9799029-9799030	9796372-9796373	Yes	9799029	9796372
AT1G28110	SCPL45	permissive	chr1	-	No	9803941-9803942	9803997-9803998	Yes	9803941	9803997
AT1G28130	GH3.17	non-targets	chr1	+	No	9828066-9828067	9828041-9828042	Yes	9828066	9828041
AT1G28200	FIP1	permissive	chr1	-	No	9850223-9850224	9850222-9850223	Yes	9850223	9850222
AT1G28280		non-targets	chr1	-	No	9886514-9886515	9886489-9886490	Yes	9886514	9886489
AT1G28470	ANAC010|NAC010|SND3	non-targets	chr1	+	Yes	10012108-10012109	10012197-10012198	Yes	10012108	10012197
AT1G29025		non-targets	chr1	-	No	10124346-10124347	10124346-10124347	No	10124346	10124346
AT1G29350		permissive	chr1	-	No	10268570-10268571	10268570-10268571	No	10268570	10268570
AT1G29370		permissive	chr1	-	No	10277889-10277890	10277889-10277890	No	10277889	10277889
AT1G29970	RPL18AA	permissive	chr1	-	NA	10499681-10499682	10499723-10499724	Yes	10499681	10499723
AT1G30080		non-targets	chr1	-	No	10550946-10550947	10550946-10550947	No	10550946	10550946
AT1G30130		non-targets	chr1	+	No	10589610-10589611	10589610-10589611	No	10589610	10589610
AT1G30320		non-targets	chr1	+	No	10682981-10682982	10682981-10682982	No	10682981	10682981
AT1G30360	ERD4	non-targets	chr1	+	No	10718976-10718977	10718976-10718977	No	10718976	10718976
AT1G30450	ATCCC1|CCC1|HAP5	permissive	chr1	+	No	10769492-10769493	10769495-10769496	Yes	10769492	10769495
AT1G30460	ATCPSF30|CPSF30	permissive	chr1	-	Yes	10774303-10774304	10771261-10771262	Yes	10774303	10771261
AT1G30640		non-targets	chr1	+	No	10864970-10864971	10864976-10864977	Yes	10864970	10864976
AT1G30700		non-targets	chr1	+	No	10894477-10894478	10894534-10894535	Yes	10894477	10894534
AT1G31050		non-targets	chr1	-	No	11075476-11075477	11075414-11075415	Yes	11075476	11075414
AT1G31600	AtTRM9|TRM9	non-targets	chr1	-	Yes	11313106-11313107	11313198-11313199	Yes	11313106	11313198
AT1G31910		stringent	chr1	+	No	11461817-11461818	11461817-11461818	No	11461817	11461817
AT1G32230	ATP8|AtRCD1|CEO|CEO1|RCD1	stringent	chr1	+	No	11616176-11616177	11616176-11616177	No	11616176	11616176
AT1G32360		non-targets	chr1	+	No	11675335-11675336	11675338-11675339	Yes	11675335	11675338
AT1G32370	TOM2B|TTM1	non-targets	chr1	+	No	11678394-11678395	11678395-11678396	Yes	11678394	11678395
AT1G32450	NRT1.5	permissive	chr1	-	Yes	11719810-11719811	11715230-11715231	Yes	11719810	11715230
AT1G32490	EMB2733|ESP3	permissive	chr1	-	Yes	11747363-11747364	11742052-11742053	Yes	11747363	11742052
AT1G32530		non-targets	chr1	-	No	11759465-11759466	11759467-11759468	Yes	11759465	11759467
AT1G32810		permissive	chr1	+	No	11885959-11885960	11886046-11886047	Yes	11885959	11886046
AT1G33110		permissive	chr1	+	No	12008729-12008730	12008730-12008731	Yes	12008729	12008730
AT1G33240	AT-GTL1|ATGTL1|GTL1	non-targets	chr1	-	No	12051471-12051472	12051471-12051472	No	12051471	12051471
AT1G33600		non-targets	chr1	+	Yes	12182362-12182363	12182305-12182306	Yes	12182362	12182305
AT1G34260	FAB1D	non-targets	chr1	+	No	12492170-12492171	12492170-12492171	No	12492170	12492170
AT1G34750		non-targets	chr1	-	No	12736070-12736071	12736068-12736069	Yes	12736070	12736068
AT1G35320		non-targets	chr1	-	Yes	12960199-12960200	NA	NA	12960199	NA
AT1G36990		non-targets	chr1	-	No	14027296-14027297	14027295-14027296	Yes	14027296	14027295
AT1G41830	SKS6	non-targets	chr1	-	No	15603615-15603616	15603615-15603616	No	15603615	15603615
AT1G42990	ATBZIP60|BZIP60	non-targets	chr1	-	No	16135885-16135886	16135883-16135884	Yes	16135885	16135883
AT1G44350	ILL6	non-targets	chr1	-	No	16834570-16834571	16834627-16834628	Yes	16834570	16834627
AT1G44800	SIAR1|UMAMIT18	non-targets	chr1	-	No	16914115-16914116	16914115-16914116	No	16914115	16914115
AT1G45145	ATH5|ATTRX5|LIV1|TRX-h5|TRX5	non-targets	chr1	-	No	17075138-17075139	17075138-17075139	No	17075138	17075138
AT1G45249	ABF2|AREB1|AtABF2|ATAREB1	permissive	chr1	-	No	17165225-17165226	17165157-17165158	Yes	17165225	17165157
AT1G46768	RAP2.1	non-targets	chr1	-	No	17265763-17265764	17265747-17265748	Yes	17265763	17265747
AT1G47128	RD21|RD21A	stringent	chr1	-	No	17282907-17282908	17282917-17282918	Yes	17282907	17282917
AT1G47570		non-targets	chr1	+	No	17483418-17483419	17483430-17483431	Yes	17483418	17483430
AT1G48090		stringent	chr1	-	No	17732037-17732038	17732039-17732040	Yes	17732037	17732039
AT1G48170		permissive	chr1	+	No	17789763-17789764	17789767-17789768	Yes	17789763	17789767
AT1G48420	ACD1|ATACD1|AtDCD|D-CDES|DCD	permissive	chr1	-	No	17896615-17896616	17896613-17896614	Yes	17896615	17896613
AT1G48970		non-targets	chr1	-	No	18113590-18113591	18113617-18113618	Yes	18113590	18113617
AT1G49160	WNK7	non-targets	chr1	-	No	18179262-18179263	18179297-18179298	Yes	18179262	18179297
AT1G49310		non-targets	chr1	-	No	18237875-18237876	18237875-18237876	No	18237875	18237875
AT1G49840		non-targets	chr1	+	No	18454427-18454428	18454302-18454303	Yes	18454427	18454302
AT1G49980		non-targets	chr1	+	Yes	18513169-18513170	18513270-18513271	Yes	18513169	18513270
AT1G50200	ACD|ALATS	stringent	chr1	-	No	18591261-18591262	18591261-18591262	No	18591261	18591261
AT1G50410		non-targets	chr1	+	No	18677541-18677542	18677554-18677555	Yes	18677541	18677554
AT1G50420	SCL-3|SCL3	non-targets	chr1	-	No	18677920-18677921	18677922-18677923	Yes	18677920	18677922
AT1G50460	ATHKL1|HKL1	non-targets	chr1	+	No	18697705-18697706	18697543-18697544	Yes	18697705	18697543
AT1G50620		non-targets	chr1	+	No	18748426-18748427	18748411-18748412	Yes	18748426	18748411
AT1G50730		permissive	chr1	+	No	18802361-18802362	18802371-18802372	Yes	18802361	18802371
AT1G51200		stringent	chr1	+	No	18986544-18986545	18986544-18986545	No	18986544	18986544
AT1G51510	Y14	stringent	chr1	-	No	19102809-19102810	19102809-19102810	No	19102809	19102809
AT1G51560		non-targets	chr1	-	Yes	19119718-19119719	19119637-19119638	Yes	19119718	19119637
AT1G51760	IAR3|JR3	permissive	chr1	+	No	19201553-19201554	19201577-19201578	Yes	19201553	19201577
AT1G51850		non-targets	chr1	-	No	19252843-19252844	19252824-19252825	Yes	19252843	19252824
AT1G51965	ABO5	non-targets	chr1	-	Yes	19311864-19311865	19312001-19312002	Yes	19311864	19312001
AT1G51980		stringent	chr1	-	No	19323427-19323428	19323427-19323428	No	19323427	19323427
AT1G52330		non-targets	chr1	+	No	19489800-19489801	19489800-19489801	No	19489800	19489800
AT1G52360		permissive	chr1	+	No	19506161-19506162	19506161-19506162	No	19506161	19506161
AT1G52825		non-targets	chr1	-	No	19670484-19670485	19670489-19670490	Yes	19670484	19670489
AT1G53165	ATMAP4K ALPHA1	permissive	chr1	+	No	19819564-19819565	19819562-19819563	Yes	19819564	19819562
AT1G53430		non-targets	chr1	+	No	19941053-19941054	19941085-19941086	Yes	19941053	19941085
AT1G53470	MSL4	non-targets	chr1	+	No	19961785-19961786	19961785-19961786	No	19961785	19961785
AT1G53480	ATMRD1|MRD1	non-targets	chr1	-	No	NA	19963110-19963111	NA	NA	19963110
AT1G53560		stringent	chr1	-	No	19984771-19984772	19984771-19984772	No	19984771	19984771
AT1G53780		permissive	chr1	-	No	20074049-20074050	20073997-20073998	Yes	20074049	20073997
AT1G55205		permissive	chr1	+	Yes	20596014-20596015	20595879-20595880	Yes	20596014	20595879
AT1G55210		non-targets	chr1	-	No	20597866-20597867	20597866-20597867	No	20597866	20597866
AT1G55270		non-targets	chr1	-	Yes	20617954-20617955	20618005-20618006	Yes	20617954	20618005
AT1G56000		permissive	chr1	+	No	20946750-20946751	20946760-20946761	Yes	20946750	20946760
AT1G56290		non-targets	chr1	+	No	21076847-21076848	21076859-21076860	Yes	21076847	21076859
AT1G56300		non-targets	chr1	-	No	21078831-21078832	21078831-21078832	No	21078831	21078831
AT1G56600	AtGolS2|GolS2	non-targets	chr1	+	No	21209580-21209581	21209580-21209581	No	21209580	21209580
AT1G56700		stringent	chr1	+	No	21257749-21257750	21257749-21257750	No	21257749	21257749
AT1G57860		stringent	chr1	-	No	21429917-21429918	21429917-21429918	No	21429917	21429917
AT1G58190	AtRLP9|RLP9	non-targets	chr1	+	Yes	21548080-21548081	21541960-21541961	Yes	21548080	21541960
AT1G58270	ZW9	non-targets	chr1	-	No	21612288-21612289	21612293-21612294	Yes	21612288	21612293
AT1G58290	AtHEMA1|HEMA1	permissive	chr1	-	No	21623735-21623736	21623730-21623731	Yes	21623735	21623730
AT1G58520	RXW8	non-targets	chr1	+	No	21738502-21738503	21738504-21738505	Yes	21738502	21738504
AT1G59610	ADL3|CF1|DL3|DRP2B	stringent	chr1	+	No	21901005-21901006	21901005-21901006	No	21901005	21901005
AT1G59760	AtMTR4|MTR4	permissive	chr1	-	No	21984428-21984429	21984427-21984428	Yes	21984428	21984427
AT1G59890	SNL5	permissive	chr1	+	Yes	22051060-22051061	22045847-22045848	Yes	22051060	22045847
AT1G60440	ATCOAA|ATPANK1|PANK1	permissive	chr1	-	No	22266442-22266443	22266510-22266511	Yes	22266442	22266510
AT1G60670		non-targets	chr1	+	No	22347667-22347668	22347574-22347575	Yes	22347667	22347574
AT1G60710	ATB2	stringent	chr1	-	No	22354813-22354814	22354813-22354814	No	22354813	22354813
AT1G60790	TBL2	non-targets	chr1	-	No	22380037-22380038	22379994-22379995	Yes	22380037	22379994
AT1G60940	SNRK2-10|SNRK2.10|SRK2B	non-targets	chr1	-	No	22439138-22439139	22439141-22439142	Yes	22439138	22439141
AT1G61010	CPSF73-I	non-targets	chr1	-	No	22474765-22474766	22474717-22474718	Yes	22474765	22474717
AT1G61790	OST3/6	stringent	chr1	+	No	22815599-22815600	22815597-22815598	Yes	22815599	22815597
AT1G61820	BGLU46	non-targets	chr1	+	No	22838646-22838647	22838516-22838517	Yes	22838646	22838516
AT1G61890		non-targets	chr1	-	No	22867772-22867773	22867772-22867773	No	22867772	22867772
AT1G62330		non-targets	chr1	+	Yes	23047427-23047428	23050159-23050160	Yes	23047427	23050159
AT1G62430	ATCDS1|CDS1	non-targets	chr1	-	No	23105959-23105960	23105939-23105940	Yes	23105959	23105939
AT1G62570	FMO GS-OX4	non-targets	chr1	+	No	23171996-23171997	23171996-23171997	No	23171996	23171996
AT1G62660		permissive	chr1	+	No	23203701-23203702	23203635-23203636	Yes	23203701	23203635
AT1G62810	CuAO1	permissive	chr1	-	No	23258133-23258134	23258083-23258084	Yes	23258133	23258083
AT1G62880		non-targets	chr1	+	No	23293572-23293573	23293625-23293626	Yes	23293572	23293625
AT1G63160	EMB2811|RFC2	non-targets	chr1	-	Yes	23421874-23421875	23421856-23421857	Yes	23421874	23421856
AT1G63300		non-targets	chr1	+	No	23485073-23485074	23485073-23485074	No	23485073	23485073
AT1G63440	HMA5	non-targets	chr1	+	No	23531233-23531234	23531233-23531234	No	23531233	23531233
AT1G63450	RHS8|XUT1	non-targets	chr1	+	No	23534591-23534592	23534591-23534592	No	23534591	23534591
AT1G63700	EMB71|MAPKKK4|YDA	permissive	chr1	-	Yes	23625168-23625169	23624670-23624671	Yes	23625168	23624670
AT1G63855		non-targets	chr1	-	Yes	23699371-23699372	23699995-23699996	Yes	23699371	23699995
AT1G64060	ATRBOH F|ATRBOHF|RBOH F|RBOHAP108|RBOHF	non-targets	chr1	+	No	23776930-23776931	23776930-23776931	No	23776930	23776930
AT1G64380		non-targets	chr1	-	Yes	23890952-23890953	23890636-23890637	Yes	23890952	23890636
AT1G65270		stringent	chr1	+	No	24244971-24244972	24244967-24244968	Yes	24244971	24244967
AT1G65295		non-targets	chr1	+	No	24252349-24252350	24252440-24252441	Yes	24252349	24252440
AT1G65440	GTB1	permissive	chr1	-	Yes	24313138-24313139	24306717-24306718	Yes	24313138	24306717
AT1G65540	AtLETM2|LETM2	permissive	chr1	-	No	24362240-24362241	24362253-24362254	Yes	24362240	24362253
AT1G65660	SMP1	permissive	chr1	-	No	24418113-24418114	24418149-24418150	Yes	24418113	24418149
AT1G66080		non-targets	chr1	-	No	24600253-24600254	24600216-24600217	Yes	24600253	24600216
AT1G66470	AtRHD6|RHD6	non-targets	chr1	+	No	24797009-24797010	24797011-24797012	Yes	24797009	24797011
AT1G66500		non-targets	chr1	-	Yes	24811149-24811150	24812233-24812234	Yes	24811149	24812233
AT1G66510		permissive	chr1	+	No	24816111-24816112	24816112-24816113	Yes	24816111	24816112
AT1G66880		non-targets	chr1	+	No	24955665-24955666	24955565-24955566	Yes	24955665	24955565
AT1G66890		non-targets	chr1	+	Yes	24958112-24958113	24958352-24958353	Yes	24958112	24958352
AT1G67050		non-targets	chr1	-	No	25028648-25028649	25028627-25028628	Yes	25028648	25028627
AT1G67325		permissive	chr1	-	No	25209544-25209545	25209527-25209528	Yes	25209544	25209527
AT1G67630	EMB2814|POLA2	non-targets	chr1	-	Yes	25344390-25344391	25344289-25344290	Yes	25344390	25344289
AT1G67690		non-targets	chr1	+	No	NA	25370786-25370787	NA	NA	25370786
AT1G67785		stringent	chr1	-	No	25415895-25415896	25415895-25415896	No	25415895	25415895
AT1G68020	ATTPS6|TPS6	non-targets	chr1	+	Yes	25500369-25500370	25496962-25496963	Yes	25500369	25496962
AT1G68060	ATMAP70-1|MAP70-1	permissive	chr1	-	Yes	25513091-25513092	25511192-25511193	Yes	25513091	25511192
AT1G68410		non-targets	chr1	-	No	25649998-25649999	25649998-25649999	No	25649998	25649998
AT1G68490		non-targets	chr1	+	No	25695457-25695458	25695457-25695458	No	25695457	25695457
AT1G68710		non-targets	chr1	-	No	NA	25793015-25793016	NA	NA	25793015
AT1G68810		non-targets	chr1	+	No	25863078-25863079	25863078-25863079	No	25863078	25863078
AT1G69080		non-targets	chr1	-	No	25971951-25971952	25971951-25971952	No	25971951	25971951
AT1G69410	ATELF5A-3|ELF5A-3	non-targets	chr1	+	No	26090281-26090282	26090281-26090282	No	26090281	26090281
AT1G69580		non-targets	chr1	+	No	26173685-26173686	26173655-26173656	Yes	26173685	26173655
AT1G69587		permissive	chr1	-	No	26176173-26176174	26176195-26176196	Yes	26176173	26176195
AT1G69750	ATCOX19-2|COX19-2	permissive	chr1	+	No	26237561-26237562	26237571-26237572	Yes	26237561	26237571
AT1G69850	AIT1|ATNRT1:2|NRT1.2|NRT1:2|NTL1	permissive	chr1	-	No	26296750-26296751	26296739-26296740	Yes	26296750	26296739
AT1G69980		permissive	chr1	-	No	26356331-26356332	26356274-26356275	Yes	26356331	26356274
AT1G70000		non-targets	chr1	-	Yes	26363548-26363549	26363197-26363198	Yes	26363548	26363197
AT1G70230	AXY4|TBL27	non-targets	chr1	+	No	26451894-26451895	26451977-26451978	Yes	26451894	26451977
AT1G70320	UPL2	permissive	chr1	-	No	26488524-26488525	26488523-26488524	Yes	26488524	26488523
AT1G70640		non-targets	chr1	+	Yes	NA	26637183-26637184	NA	NA	26637183
AT1G70700	JAZ9|TIFY7	non-targets	chr1	+	No	26657051-26657052	26657051-26657052	No	26657051	26657051
AT1G70710	ATGH9B1|CEL1|GH9B1	non-targets	chr1	-	No	26659175-26659176	26659169-26659170	Yes	26659175	26659169
AT1G70750		non-targets	chr1	-	No	26679928-26679929	26679926-26679927	Yes	26679928	26679926
AT1G70940	ATPIN3|PIN3	non-targets	chr1	+	No	26746319-26746320	26746409-26746410	Yes	26746319	26746409
AT1G70950		non-targets	chr1	+	No	26755389-26755390	26755389-26755390	No	26755389	26755389
AT1G71040	LPR2	non-targets	chr1	-	No	26797007-26797008	26797051-26797052	Yes	26797007	26797051
AT1G71360		non-targets	chr1	-	No	26892014-26892015	26892103-26892104	Yes	26892014	26892103
AT1G71410		permissive	chr1	-	No	26912750-26912751	26912770-26912771	Yes	26912750	26912770
AT1G71695		non-targets	chr1	+	No	26966673-26966674	26966673-26966674	No	26966673	26966673
AT1G71710		non-targets	chr1	-	No	26973567-26973568	26973567-26973568	No	26973567	26973567
AT1G71800	CSTF64	permissive	chr1	+	No	27002341-27002342	27002341-27002342	No	27002341	27002341
AT1G71960	ABCG25|ATABCG25	non-targets	chr1	-	No	27082394-27082395	27082394-27082395	No	27082394	27082394
AT1G72416		non-targets	chr1	-	No	27258853-27258854	27258864-27258865	Yes	27258853	27258864
AT1G72490		non-targets	chr1	-	No	27288866-27288867	27288907-27288908	Yes	27288866	27288907
AT1G72510		non-targets	chr1	+	No	27304584-27304585	27304584-27304585	No	27304584	27304584
AT1G72830	ATHAP2C|HAP2C|NF-YA3	non-targets	chr1	-	Yes	27405445-27405446	27405186-27405187	Yes	27405445	27405186
AT1G72850		non-targets	chr1	+	Yes	27415540-27415541	27415473-27415474	Yes	27415540	27415473
AT1G73490		non-targets	chr1	-	No	27633265-27633266	27633265-27633266	No	27633265	27633265
AT1G73860		non-targets	chr1	-	No	27770992-27770993	27770972-27770973	Yes	27770992	27770972
AT1G73920		permissive	chr1	+	No	27794855-27794856	27794873-27794874	Yes	27794855	27794873
AT1G74080	ATMYB122|MYB122	non-targets	chr1	+	No	27857578-27857579	27857625-27857626	Yes	27857578	27857625
AT1G74250		non-targets	chr1	+	No	27922629-27922630	27922632-27922633	Yes	27922629	27922632
AT1G74700	NUZ|TRZ1	non-targets	chr1	+	No	28067256-28067257	28067444-28067445	Yes	28067256	28067444
AT1G74840		non-targets	chr1	-	No	28115908-28115909	28115908-28115909	No	28115908	28115908
AT1G74950	JAZ2|TIFY10B	non-targets	chr1	-	No	28148580-28148581	28148580-28148581	No	28148580	28148580
AT1G75390	AtbZIP44|bZIP44	non-targets	chr1	+	No	28292999-28293000	28293007-28293008	Yes	28292999	28293007
AT1G75410	BLH3	non-targets	chr1	-	No	28299797-28299798	28299924-28299925	Yes	28299797	28299924
AT1G75980		non-targets	chr1	-	No	28522686-28522687	28522749-28522750	Yes	28522686	28522749
AT1G76010		stringent	chr1	-	No	28528282-28528283	28528257-28528258	Yes	28528282	28528257
AT1G76065		non-targets	chr1	-	Yes	28544739-28544740	28544220-28544221	Yes	28544739	28544220
AT1G76500	AHL29|SOB3	non-targets	chr1	+	Yes	28706757-28706758	28706582-28706583	Yes	28706757	28706582
AT1G76520		permissive	chr1	+	No	28717415-28717416	28717490-28717491	Yes	28717415	28717490
AT1G76880		permissive	chr1	+	No	28868122-28868123	28868123-28868124	Yes	28868122	28868123
AT1G76890	AT-GT2|GT2	non-targets	chr1	-	No	28873063-28873064	28873058-28873059	Yes	28873063	28873058
AT1G76990	ACR3	permissive	chr1	+	No	28935407-28935408	28935448-28935449	Yes	28935407	28935448
AT1G77080	AGL27|FLM|MAF1	non-targets	chr1	+	No	28960074-28960075	28960096-28960097	Yes	28960074	28960096
AT1G77470	EMB2810|RFC3|RFC5	permissive	chr1	-	Yes	29112022-29112023	29111960-29111961	Yes	29112022	29111960
AT1G77690	LAX3	non-targets	chr1	-	Yes	29201058-29201059	29200918-29200919	Yes	29201058	29200918
AT1G77770		non-targets	chr1	-	No	29246187-29246188	29246212-29246213	Yes	29246187	29246212
AT1G78020		non-targets	chr1	+	No	29339756-29339757	29339756-29339757	No	29339756	29339756
AT1G78070		non-targets	chr1	+	No	29358563-29358564	29358565-29358566	Yes	29358563	29358565
AT1G78210		non-targets	chr1	-	No	29422747-29422748	29422747-29422748	No	29422747	29422747
AT1G78420		non-targets	chr1	+	Yes	29507666-29507667	29507377-29507378	Yes	29507666	29507377
AT1G78670	ATGGH3|GGH3	non-targets	chr1	+	No	29593465-29593466	29593498-29593499	Yes	29593465	29593498
AT1G78790		non-targets	chr1	-	No	29623526-29623527	29623526-29623527	No	29623526	29623526
AT1G79000	ATHAC1|ATHPCAT2|HAC1|PCAT2	permissive	chr1	-	No	29716349-29716350	29716352-29716353	Yes	29716349	29716352
AT1G79430	APL|WDY	non-targets	chr1	-	Yes	29877265-29877266	29877302-29877303	Yes	29877265	29877302
AT1G79500	AtkdsA1	permissive	chr1	+	Yes	29906512-29906513	29906290-29906291	Yes	29906512	29906290
AT1G79990		stringent	chr1	+	No	30092229-30092230	30092229-30092230	No	30092229	30092229
AT1G80420	ATXRCC1|XRCC1	non-targets	chr1	-	No	30235220-30235221	30235207-30235208	Yes	30235220	30235207
AT1G80640		non-targets	chr1	+	No	30314471-30314472	30314428-30314429	Yes	30314471	30314428
AT1G80790	FDM5	non-targets	chr1	+	No	30361172-30361173	30361172-30361173	No	30361172	30361172
AT1G80840	ATWRKY40|WRKY40	non-targets	chr1	+	No	30385495-30385496	30385495-30385496	No	30385495	30385495
AT1G80950		permissive	chr1	-	No	30412543-30412544	30412539-30412540	Yes	30412543	30412539
AT2G01490	PAHX	stringent	chr2	+	No	223406-223407	223401-223402	Yes	223406	223401
AT2G01680		non-targets	chr2	+	No	308934-308935	308934-308935	No	308934	308934
AT2G01910	ATMAP65-6|MAP65-6	non-targets	chr2	+	No	420566-420567	420566-420567	No	420566	420566
AT2G01930	ATBPC1|BBR|BPC1	non-targets	chr2	-	Yes	428543-428544	NA	NA	428543	NA
AT2G02390	ATGSTZ1|AtMAAI|GST18|GSTZ1|MAAI	stringent	chr2	+	No	631093-631094	631093-631094	No	631093	631093
AT2G02690		non-targets	chr2	+	No	750079-750080	750079-750080	No	750079	750079
AT2G02820	AtMYB88|MYB88	non-targets	chr2	-	Yes	804172-804173	803858-803859	Yes	804172	803858
AT2G02870		permissive	chr2	+	No	840128-840129	840128-840129	No	840128	840128
AT2G03070	MED8	permissive	chr2	+	No	909313-909314	909310-909311	Yes	909313	909310
AT2G03150	emb1579	permissive	chr2	+	No	959211-959212	959153-959154	Yes	959211	959153
AT2G03340	WRKY3	non-targets	chr2	-	No	1014355-1014356	1014356-1014357	Yes	1014355	1014356
AT2G03440	ATNRP1|NRP1	non-targets	chr2	-	No	1039244-1039245	1039213-1039214	Yes	1039244	1039213
AT2G03810		non-targets	chr2	+	No	1164573-1164574	1164572-1164573	Yes	1164573	1164572
AT2G04620		non-targets	chr2	-	No	1610328-1610329	1610329-1610330	Yes	1610328	1610329
AT2G04880	ATWRKY1|WRKY1|ZAP1	non-targets	chr2	+	No	1720531-1720532	1720531-1720532	No	1720531	1720531
AT2G05160		non-targets	chr2	-	No	1858546-1858547	1858546-1858547	No	1858546	1858546
AT2G06025		non-targets	chr2	+	No	2352108-2352109	2352108-2352109	No	2352108	2352108
AT2G06990	HEN2	permissive	chr2	+	Yes	2901099-2901100	2901077-2901078	Yes	2901099	2901077
AT2G13790	ATSERK4|BAK7|BKK1|SERK4	non-targets	chr2	+	Yes	5743626-5743627	5746758-5746759	Yes	5743626	5746758
AT2G14120	DRP3B	permissive	chr2	-	No	5954023-5954024	5954028-5954029	Yes	5954023	5954028
AT2G15300		non-targets	chr2	+	No	6652101-6652102	6652138-6652139	Yes	6652101	6652138
AT2G15480	UGT73B5	non-targets	chr2	+	NA	6763499-6763500	6763499-6763500	No	6763499	6763499
AT2G15580		non-targets	chr2	+	Yes	6798833-6798834	6798337-6798338	Yes	6798833	6798337
AT2G15890	MEE14	non-targets	chr2	-	No	6921020-6921021	6921020-6921021	No	6921020	6921020
AT2G16365		non-targets	chr2	+	No	7076590-7076591	7076592-7076593	Yes	7076590	7076592
AT2G16500	ADC1|ARGDC|ARGDC1|SPE1	non-targets	chr2	-	No	7150633-7150634	7150633-7150634	No	7150633	7150633
AT2G16660		non-targets	chr2	-	No	7218729-7218730	7218734-7218735	Yes	7218729	7218734
AT2G16710		non-targets	chr2	+	No	7250115-7250116	7250128-7250129	Yes	7250115	7250128
AT2G16860		permissive	chr2	-	No	7303918-7303919	7303919-7303920	Yes	7303918	7303919
AT2G16980		non-targets	chr2	+	No	7381099-7381100	7381098-7381099	Yes	7381099	7381098
AT2G17700	STY8	non-targets	chr2	-	No	7685411-7685412	7685336-7685337	Yes	7685411	7685336
AT2G18860		non-targets	chr2	+	No	8165947-8165948	8165855-8165856	Yes	8165947	8165855
AT2G18876		non-targets	chr2	+	Yes	8170979-8170980	8172485-8172486	Yes	8170979	8172485
AT2G18980		non-targets	chr2	-	No	8233304-8233305	8233304-8233305	No	8233304	8233304
AT2G19060		non-targets	chr2	+	No	8259943-8259944	8259977-8259978	Yes	8259943	8259977
AT2G19110	ATHMA4|HMA4	non-targets	chr2	+	No	8286444-8286445	8286423-8286424	Yes	8286444	8286423
AT2G19800	MIOX2	non-targets	chr2	-	No	8530907-8530908	8530907-8530908	No	8530907	8530907
AT2G20320		non-targets	chr2	+	No	8772648-8772649	8772650-8772651	Yes	8772648	8772650
AT2G20410		non-targets	chr2	+	Yes	8802283-8802284	8804369-8804370	Yes	8802283	8804369
AT2G20725		permissive	chr2	-	Yes	8934021-8934022	8933838-8933839	Yes	8934021	8933838
AT2G20830		permissive	chr2	-	No	8969887-8969888	8969858-8969859	Yes	8969887	8969858
AT2G21070	FIO1	non-targets	chr2	+	Yes	9043631-9043632	9043322-9043323	Yes	9043631	9043322
AT2G21340		non-targets	chr2	+	No	9136458-9136459	9136473-9136474	Yes	9136458	9136473
AT2G21380		non-targets	chr2	+	No	9149271-9149272	9149271-9149272	No	9149271	9149271
AT2G21385		non-targets	chr2	+	Yes	9151867-9151868	9150756-9150757	Yes	9151867	9150756
AT2G21410	VHA-A2	stringent	chr2	+	No	9168451-9168452	9168451-9168452	No	9168451	9168451
AT2G21550		non-targets	chr2	+	Yes	9228699-9228700	9230268-9230269	Yes	9228699	9230268
AT2G21560		non-targets	chr2	-	No	9230195-9230196	9230225-9230226	Yes	9230195	9230225
AT2G22270		non-targets	chr2	+	No	9465441-9465442	9465512-9465513	Yes	9465441	9465512
AT2G22475	GEM	permissive	chr2	+	No	9544987-9544988	9545005-9545006	Yes	9544987	9545005
AT2G22500	ATPUMP5|DIC1|UCP5	non-targets	chr2	-	No	9563297-9563298	9563336-9563337	Yes	9563297	9563336
AT2G22620		non-targets	chr2	-	No	9604781-9604782	9604770-9604771	Yes	9604781	9604770
AT2G22780	PMDH1	permissive	chr2	-	No	9689725-9689726	9689725-9689726	No	9689725	9689725
AT2G22910	NAGS1	non-targets	chr2	+	No	9752862-9752863	9752862-9752863	No	9752862	9752862
AT2G23380	CLF|ICU1|SDG1|SET1	permissive	chr2	+	No	9960376-9960377	9960358-9960359	Yes	9960376	9960358
AT2G24040		non-targets	chr2	+	No	10224621-10224622	10224621-10224622	No	10224621	10224621
AT2G24490	ATRPA2|ATRPA32A|ROR1|RPA2|RPA32A	non-targets	chr2	-	No	10398408-10398409	10398408-10398409	No	10398408	10398408
AT2G24550		non-targets	chr2	-	No	10427897-10427898	10427910-10427911	Yes	10427897	10427910
AT2G24830		non-targets	chr2	-	Yes	10576811-10576812	10577140-10577141	Yes	10576811	10577140
AT2G25320		non-targets	chr2	-	No	10781626-10781627	10781624-10781625	Yes	10781626	10781624
AT2G25590		non-targets	chr2	+	No	NA	10892804-10892805	NA	NA	10892804
AT2G25605		non-targets	chr2	+	Yes	10901046-10901047	10900988-10900989	Yes	10901046	10900988
AT2G25670		stringent	chr2	-	Yes	10928812-10928813	10929299-10929300	Yes	10928812	10929299
AT2G26100		permissive	chr2	-	No	11115904-11115905	11115893-11115894	Yes	11115904	11115893
AT2G26350	ATPEX10|PEX10	non-targets	chr2	-	No	11217440-11217441	11217443-11217444	Yes	11217440	11217443
AT2G26510	PDE135	permissive	chr2	+	No	11277608-11277609	11277608-11277609	No	11277608	11277608
AT2G26590	RPN13	permissive	chr2	-	No	11311025-11311026	11311025-11311026	No	11311025	11311025
AT2G26600		non-targets	chr2	+	No	11318441-11318442	11318441-11318442	No	11318441	11318441
AT2G26690		non-targets	chr2	-	No	11347246-11347247	11347243-11347244	Yes	11347246	11347243
AT2G26710	BAS1|CYP72B1|CYP734A1	non-targets	chr2	+	No	11383599-11383600	11383710-11383711	Yes	11383599	11383710
AT2G26730		permissive	chr2	+	No	11388593-11388594	11388593-11388594	No	11388593	11388593
AT2G26770	SCAB1	non-targets	chr2	-	No	11404067-11404068	11404065-11404066	Yes	11404067	11404065
AT2G27170	SMC3|TTN7	non-targets	chr2	-	No	11609086-11609087	11609090-11609091	Yes	11609086	11609090
AT2G27230	LHW	permissive	chr2	+	No	11654151-11654152	11654131-11654132	Yes	11654151	11654131
AT2G27360		non-targets	chr2	+	No	11708064-11708065	11708064-11708065	No	11708064	11708064
AT2G27430		non-targets	chr2	-	No	11729756-11729757	11729686-11729687	Yes	11729756	11729686
AT2G27500		non-targets	chr2	-	No	11752219-11752220	11752219-11752220	No	11752219	11752219
AT2G27770		non-targets	chr2	-	Yes	11832653-11832654	11832921-11832922	Yes	11832653	11832921
AT2G27930		non-targets	chr2	+	No	11893709-11893710	11893631-11893632	Yes	11893709	11893631
AT2G28720		non-targets	chr2	+	No	12327621-12327622	12327665-12327666	Yes	12327621	12327665
AT2G28890	PLL4	permissive	chr2	-	No	12405594-12405595	12405617-12405618	Yes	12405594	12405617
AT2G28900	ATOEP16-1|ATOEP16-L|OEP16|OEP16-1	permissive	chr2	-	Yes	12414274-12414275	12414300-12414301	Yes	12414274	12414300
AT2G29070		non-targets	chr2	+	No	12489578-12489579	12489573-12489574	Yes	12489578	12489573
AT2G29440	ATGSTU6|GST24|GSTU6	non-targets	chr2	-	No	12620062-12620063	12620062-12620063	No	12620062	12620062
AT2G29490	ATGSTU1|GST19|GSTU1	non-targets	chr2	-	No	12631441-12631442	12631505-12631506	Yes	12631441	12631505
AT2G29670		non-targets	chr2	-	No	12682189-12682190	12682143-12682144	Yes	12682189	12682143
AT2G29980	AtFAD3|FAD3	permissive	chr2	-	No	12781626-12781627	12781626-12781627	No	12781626	12781626
AT2G29995		non-targets	chr2	-	No	12796890-12796891	12796903-12796904	Yes	12796890	12796903
AT2G30020		non-targets	chr2	+	No	12816107-12816108	12816107-12816108	No	12816107	12816107
AT2G30120		non-targets	chr2	-	No	12860540-12860541	12860542-12860543	Yes	12860540	12860542
AT2G30130	ASL5|LBD12|PCK1	non-targets	chr2	+	No	12869957-12869958	12869957-12869958	No	12869957	12869957
AT2G30230		non-targets	chr2	+	No	12897911-12897912	12897917-12897918	Yes	12897911	12897917
AT2G30460		permissive	chr2	-	No	12976131-12976132	12976093-12976094	Yes	12976131	12976093
AT2G30550		non-targets	chr2	+	No	13017092-13017093	13017092-13017093	No	13017092	13017092
AT2G30800	ATVT-1|HVT1	non-targets	chr2	-	No	13120311-13120312	13120350-13120351	Yes	13120311	13120350
AT2G31141		non-targets	chr2	-	Yes	13271861-13271862	13271855-13271856	Yes	13271861	13271855
AT2G31390		permissive	chr2	-	No	13383424-13383425	13383424-13383425	No	13383424	13383424
AT2G31600		non-targets	chr2	-	No	13448183-13448184	13448183-13448184	No	13448183	13448183
AT2G31750	UGT74D1	non-targets	chr2	+	No	13499998-13499999	13499998-13499999	No	13499998	13499998
AT2G31900	ATMYO5|ATXIF|XIF	non-targets	chr2	-	No	13560415-13560416	13560415-13560416	No	13560415	13560415
AT2G32240		non-targets	chr2	-	No	13684348-13684349	13684348-13684349	No	13684348	13684348
AT2G32320		non-targets	chr2	+	No	13731760-13731761	13731753-13731754	Yes	13731760	13731753
AT2G33435		non-targets	chr2	+	Yes	14173490-14173491	14167992-14167993	Yes	14173490	14167992
AT2G33730		permissive	chr2	-	No	14265489-14265490	14265489-14265490	No	14265489	14265489
AT2G34140		non-targets	chr2	-	No	14414009-14414010	14413980-14413981	Yes	14414009	14413980
AT2G34450		non-targets	chr2	-	No	14526640-14526641	NA	NA	14526640	NA
AT2G34680	AIR9	permissive	chr2	-	No	14616775-14616776	14616768-14616769	Yes	14616775	14616768
AT2G34730		non-targets	chr2	+	Yes	14655617-14655618	14657620-14657621	Yes	14655617	14657620
AT2G35060	KUP11	non-targets	chr2	-	No	14775070-14775071	14775070-14775071	No	14775070	14775070
AT2G35190	ATNPSN11|NPSN11|NSPN11	non-targets	chr2	+	No	14833319-14833320	14833319-14833320	No	14833319	14833319
AT2G35470		non-targets	chr2	-	No	14908934-14908935	14908879-14908880	Yes	14908934	14908879
AT2G35620	FEI2	permissive	chr2	-	No	14960959-14960960	14960960-14960961	Yes	14960959	14960960
AT2G35630	GEM1|MOR1	permissive	chr2	+	Yes	14980604-14980605	14971226-14971227	Yes	14980604	14971226
AT2G35635	RUB2|UBQ7	stringent	chr2	+	No	14982068-14982069	14982050-14982051	Yes	14982068	14982050
AT2G35736		permissive	chr2	-	Yes	15022944-15022945	15022478-15022479	Yes	15022944	15022478
AT2G35840		stringent	chr2	+	No	15056004-15056005	15055968-15055969	Yes	15056004	15055968
AT2G35940	BLH1|EDA29	non-targets	chr2	-	No	15088862-15088863	15088895-15088896	Yes	15088862	15088895
AT2G36080	ABS2|NGAL1	non-targets	chr2	-	No	15148381-15148382	15148361-15148362	Yes	15148381	15148361
AT2G36320		non-targets	chr2	+	No	15230119-15230120	15230119-15230120	No	15230119	15230119
AT2G36480		non-targets	chr2	-	No	15302649-15302650	15302804-15302805	Yes	15302649	15302804
AT2G36740	ATSWC2|SWC2	permissive	chr2	-	No	15406695-15406696	15406689-15406690	Yes	15406695	15406689
AT2G36880	MAT3	permissive	chr2	-	No	15479380-15479381	15479404-15479405	Yes	15479380	15479404
AT2G36890	ATMYB38|BIT1|MYB38|RAX2	non-targets	chr2	+	No	15487343-15487344	15487306-15487307	Yes	15487343	15487306
AT2G36900	ATMEMB11|MEMB11	permissive	chr2	-	No	15491451-15491452	15491451-15491452	No	15491451	15491451
AT2G36950		non-targets	chr2	+	No	15516905-15516906	15517001-15517002	Yes	15516905	15517001
AT2G37080	RIP2	permissive	chr2	-	No	15581442-15581443	NA	NA	15581442	NA
AT2G37130		non-targets	chr2	-	No	15598101-15598102	15598101-15598102	No	15598101	15598101
AT2G37250	ADK|ATPADK1	permissive	chr2	+	No	15643595-15643596	15643571-15643572	Yes	15643595	15643571
AT2G37940	AtIPCS2|ERH1	stringent	chr2	+	No	15879595-15879596	15879593-15879594	Yes	15879595	15879593
AT2G38090		non-targets	chr2	+	No	15946955-15946956	15946979-15946980	Yes	15946955	15946979
AT2G38400	AGT3	non-targets	chr2	+	No	16086157-16086158	16086157-16086158	No	16086157	16086157
AT2G38580		non-targets	chr2	+	No	16142602-16142603	16142603-16142604	Yes	16142602	16142603
AT2G38650	GAUT7|LGT7	permissive	chr2	-	No	16161482-16161483	16161483-16161484	Yes	16161482	16161483
AT2G38750	ANNAT4	non-targets	chr2	-	No	16196376-16196377	16196445-16196446	Yes	16196376	16196445
AT2G38870		non-targets	chr2	-	No	16236395-16236396	16236395-16236396	No	16236395	16236395
AT2G38940	ATPT2|PHT1;4	non-targets	chr2	+	No	16260227-16260228	16260224-16260225	Yes	16260227	16260224
AT2G39010	PIP2;6|PIP2E	non-targets	chr2	+	Yes	16293994-16293995	16293822-16293823	Yes	16293994	16293822
AT2G39340	AtSAC3A|SAC3A	non-targets	chr2	+	No	16430107-16430108	16430106-16430107	Yes	16430107	16430106
AT2G39410		non-targets	chr2	+	No	16458352-16458353	16458352-16458353	No	16458352	16458352
AT2G39500		non-targets	chr2	+	No	16489578-16489579	16489525-16489526	Yes	16489578	16489525
AT2G39570	ACR9	permissive	chr2	+	Yes	16510173-16510174	16509946-16509947	Yes	16510173	16509946
AT2G39580		non-targets	chr2	+	No	16517165-16517166	16517170-16517171	Yes	16517165	16517170
AT2G39705	DVL11|RTFL8	non-targets	chr2	+	No	16557576-16557577	16557576-16557577	No	16557576	16557576
AT2G39800	ATP5CS|P5CS1	stringent	chr2	-	No	16598204-16598205	16598204-16598205	No	16598204	16598204
AT2G40360		permissive	chr2	-	No	16852985-16852986	16853002-16853003	Yes	16852985	16853002
AT2G40400		non-targets	chr2	+	No	16872720-16872721	16872720-16872721	No	16872720	16872720
AT2G40410	AtCaN2|CAN2	non-targets	chr2	+	No	16875395-16875396	16875395-16875396	No	16875395	16875395
AT2G41060		non-targets	chr2	+	Yes	17129532-17129533	17129109-17129110	Yes	17129532	17129109
AT2G41300	SSL1	non-targets	chr2	-	Yes	17214182-17214183	17214164-17214165	Yes	17214182	17214164
AT2G41310	ARR8|ATRR3|RR3	permissive	chr2	+	No	17224814-17224815	17224814-17224815	No	17224814	17224814
AT2G41350	AtAUG1|AUG1|EMB2819	non-targets	chr2	+	No	17233572-17233573	17233569-17233570	Yes	17233572	17233569
AT2G41630	AtTFIIB1|TFIIB|TFIIB1	permissive	chr2	-	No	17355331-17355332	17355331-17355332	No	17355331	17355331
AT2G41750		non-targets	chr2	-	Yes	17421644-17421645	17421631-17421632	Yes	17421644	17421631
AT2G41760		permissive	chr2	+	Yes	17424328-17424329	17424432-17424433	Yes	17424328	17424432
AT2G41880	AGK1|GK-1	non-targets	chr2	+	No	17477256-17477257	17477264-17477265	Yes	17477256	17477264
AT2G41945		permissive	chr2	-	Yes	17508855-17508856	17510895-17510896	Yes	17508855	17510895
AT2G41960		non-targets	chr2	-	No	17514125-17514126	17514127-17514128	Yes	17514125	17514127
AT2G42280	FBH4	non-targets	chr2	-	No	17611218-17611219	17611249-17611250	Yes	17611218	17611249
AT2G42880	ATMPK20|MPK20	stringent	chr2	-	No	17840474-17840475	17840474-17840475	No	17840474	17840474
AT2G43060	AtIBH1|IBH1	non-targets	chr2	+	Yes	17910080-17910081	17909363-17909364	Yes	17910080	17909363
AT2G43320		non-targets	chr2	-	No	17996652-17996653	17996652-17996653	No	17996652	17996652
AT2G43410	FPA	non-targets	chr2	-	Yes	18025269-18025270	18030645-18030646	Yes	18025269	18030645
AT2G43490		permissive	chr2	-	No	18054411-18054412	18054423-18054424	Yes	18054411	18054423
AT2G43590		non-targets	chr2	-	No	18081429-18081430	18081431-18081432	Yes	18081429	18081431
AT2G43640		permissive	chr2	-	No	18097498-18097499	18097498-18097499	No	18097498	18097498
AT2G43910	ATHOL1|HOL1	stringent	chr2	-	No	18184517-18184518	18184517-18184518	No	18184517	18184517
AT2G45290		permissive	chr2	+	No	18675751-18675752	18675779-18675780	Yes	18675751	18675779
AT2G45400	BEN1	non-targets	chr2	-	No	18703830-18703831	18703830-18703831	No	18703830	18703830
AT2G45540		permissive	chr2	-	No	18757490-18757491	18757493-18757494	Yes	18757490	18757493
AT2G45820		stringent	chr2	-	No	18862969-18862970	18862969-18862970	No	18862969	18862969
AT2G45920		non-targets	chr2	+	No	18901201-18901202	18901201-18901202	No	18901201	18901201
AT2G46020	ATBRM|BRM|CHA2|CHR2	permissive	chr2	+	No	18931936-18931937	18931966-18931967	Yes	18931936	18931966
AT2G46150		non-targets	chr2	+	No	18962363-18962364	18962363-18962364	No	18962363	18962363
AT2G46180	GC4	non-targets	chr2	-	No	18967287-18967288	18967328-18967329	Yes	18967287	18967328
AT2G46240	ATBAG6|BAG6	non-targets	chr2	+	No	18989927-18989928	18989927-18989928	No	18989927	18989927
AT2G46260	LRB1	permissive	chr2	+	No	18998635-18998636	18998602-18998603	Yes	18998635	18998602
AT2G46270	GBF3	non-targets	chr2	+	No	19003403-19003404	19003407-19003408	Yes	19003403	19003407
AT2G46330	AGP16|ATAGP16	non-targets	chr2	-	No	19018507-19018508	19018507-19018508	No	19018507	19018507
AT2G46340	SPA1	non-targets	chr2	-	No	19022172-19022173	19022172-19022173	No	19022172	19022172
AT2G46400	ATWRKY46|WRKY46	non-targets	chr2	-	Yes	19043589-19043590	19043413-19043414	Yes	19043589	19043413
AT2G46590	DAG2	non-targets	chr2	+	No	19135309-19135310	19135309-19135310	No	19135309	19135309
AT2G46630		non-targets	chr2	+	Yes	NA	19146780-19146781	NA	NA	19146780
AT2G47140	AtSDR5|SDR5	non-targets	chr2	-	No	19350738-19350739	19350738-19350739	No	19350738	19350738
AT2G47240	CER8|LACS1	non-targets	chr2	+	No	19392726-19392727	19392726-19392727	No	19392726	19392726
AT2G47460	ATMYB12|MYB12|PFG1	non-targets	chr2	+	No	19479465-19479466	19479516-19479517	Yes	19479465	19479516
AT2G47490	ATNDT1|NDT1	permissive	chr2	+	No	19489595-19489596	19489591-19489592	Yes	19489595	19489591
AT2G47500		permissive	chr2	+	No	19498159-19498160	19498159-19498160	No	19498159	19498159
AT2G47510	FUM1	stringent	chr2	+	No	19502221-19502222	19502241-19502242	Yes	19502221	19502241
AT2G47890		non-targets	chr2	+	No	19609635-19609636	19609562-19609563	Yes	19609635	19609562
AT3G42950		non-targets	chr3	+	No	15018094-15018095	15018091-15018092	Yes	15018094	15018091
AT3G43270		non-targets	chr3	-	No	15222260-15222261	15222269-15222270	Yes	15222260	15222269
AT3G43810	AtCAM7|CAM7	stringent	chr3	-	No	15664398-15664399	15664484-15664485	Yes	15664398	15664484
AT3G44430		non-targets	chr3	+	Yes	16069195-16069196	16069660-16069661	Yes	16069195	16069660
AT3G44610		non-targets	chr3	-	No	NA	16188194-16188195	NA	NA	16188194
AT3G45190		permissive	chr3	-	No	16541671-16541672	16541672-16541673	Yes	16541671	16541672
AT3G46010	ADF1|atadf|ATADF1	stringent	chr3	-	No	16909405-16909406	16909405-16909406	No	16909405	16909405
AT3G46200	aTNUDT9|NUDT9	non-targets	chr3	+	No	16971274-16971275	16971230-16971231	Yes	16971274	16971230
AT3G46640	LUX|PCL1	non-targets	chr3	+	Yes	17185184-17185185	17184463-17184464	Yes	17185184	17184463
AT3G46930		non-targets	chr3	+	Yes	17288291-17288292	17287555-17287556	Yes	17288291	17287555
AT3G47680		non-targets	chr3	-	No	17577342-17577343	17577348-17577349	Yes	17577342	17577348
AT3G47860	CHL	non-targets	chr3	-	Yes	17656689-17656690	17656713-17656714	Yes	17656689	17656713
AT3G47910		permissive	chr3	-	No	17674410-17674411	17674410-17674411	No	17674410	17674410
AT3G47980		non-targets	chr3	+	No	17712800-17712801	17712801-17712802	Yes	17712800	17712801
AT3G48240		non-targets	chr3	+	No	17868472-17868473	17868479-17868480	Yes	17868472	17868479
AT3G48780	ATSPT1|SPT1	permissive	chr3	+	No	18092464-18092465	18092421-18092422	Yes	18092464	18092421
AT3G49060		non-targets	chr3	-	No	18187143-18187144	18187226-18187227	Yes	18187143	18187226
AT3G49220		non-targets	chr3	+	No	18253816-18253817	18253757-18253758	Yes	18253816	18253757
AT3G49350		non-targets	chr3	-	No	18297410-18297411	18297380-18297381	Yes	18297410	18297380
AT3G49390	CID10	permissive	chr3	-	No	18314598-18314599	18314591-18314592	Yes	18314598	18314591
AT3G49780	ATPSK3 (FORMER SYMBOL)|ATPSK4|PSK4	non-targets	chr3	+	Yes	18466628-18466629	18466380-18466381	Yes	18466628	18466380
AT3G50130		non-targets	chr3	-	No	18588945-18588946	18588977-18588978	Yes	18588945	18588977
AT3G50140		non-targets	chr3	-	Yes	18592336-18592337	18593031-18593032	Yes	18592336	18593031
AT3G50190		non-targets	chr3	-	Yes	18609247-18609248	18609113-18609114	Yes	18609247	18609113
AT3G50340		non-targets	chr3	-	No	18666555-18666556	18666555-18666556	No	18666555	18666555
AT3G50410	OBP1	non-targets	chr3	+	Yes	18710910-18710911	18710858-18710859	Yes	18710910	18710858
AT3G50900		non-targets	chr3	+	No	18918709-18918710	18918674-18918675	Yes	18918709	18918674
AT3G51120		non-targets	chr3	-	No	18985893-18985894	18985894-18985895	Yes	18985893	18985894
AT3G51140		stringent	chr3	+	No	18999686-18999687	18999673-18999674	Yes	18999686	18999673
AT3G51150		non-targets	chr3	+	Yes	19006595-19006596	19006670-19006671	Yes	19006595	19006670
AT3G51650		permissive	chr3	+	No	19162527-19162528	19162508-19162509	Yes	19162527	19162508
AT3G51910	AT-HSFA7A|HSFA7A	non-targets	chr3	+	No	19266828-19266829	19266828-19266829	No	19266828	19266828
AT3G51950		non-targets	chr3	-	No	19280572-19280573	19280572-19280573	No	19280572	19280572
AT3G52250		non-targets	chr3	+	No	19383380-19383381	19383380-19383381	No	19383380	19383380
AT3G52370	FLA15	non-targets	chr3	+	No	19419734-19419735	19419831-19419832	Yes	19419734	19419831
AT3G52560	MMZ4|UEV1D|UEV1D-4	stringent	chr3	-	No	19494377-19494378	19494455-19494456	Yes	19494377	19494455
AT3G52590	EMB2167|ERD16|HAP4|UBQ1	stringent	chr3	+	No	19506811-19506812	19506814-19506815	Yes	19506811	19506814
AT3G52750	FTSZ2-2	non-targets	chr3	-	Yes	19549550-19549551	19549660-19549661	Yes	19549550	19549660
AT3G52890	KIPK	non-targets	chr3	+	No	19610179-19610180	19610179-19610180	No	19610179	19610179
AT3G52930	AtFBA8|FBA8	stringent	chr3	-	No	19627132-19627133	19627132-19627133	No	19627132	19627132
AT3G53350	MIDD1|RIP3|RIP4	non-targets	chr3	-	No	19780035-19780036	19780014-19780015	Yes	19780035	19780014
AT3G53390		non-targets	chr3	+	Yes	19796596-19796597	19796779-19796780	Yes	19796596	19796779
AT3G54670	ATSMC1|SMC1|TTN8	non-targets	chr3	+	Yes	20243957-20243958	20241221-20241222	Yes	20243957	20241221
AT3G54770	ARP1	non-targets	chr3	-	No	20273720-20273721	20273720-20273721	No	20273720	20273720
AT3G55030	PGPS2	permissive	chr3	+	No	20398652-20398653	20398650-20398651	Yes	20398652	20398650
AT3G55430		non-targets	chr3	-	No	20549677-20549678	20549677-20549678	No	20549677	20549677
AT3G55470		non-targets	chr3	+	No	20566285-20566286	20566328-20566329	Yes	20566285	20566328
AT3G55950	ATCRR3|CCR3	non-targets	chr3	-	Yes	20753789-20753790	20753640-20753641	Yes	20753789	20753640
AT3G56110	PRA1.B1	non-targets	chr3	-	No	20821957-20821958	20821957-20821958	No	20821957	20821957
AT3G56150	ATEIF3C-1|ATTIF3C1|EIF3C|EIF3C-1|TIF3C1	stringent	chr3	-	No	20833576-20833577	20833576-20833577	No	20833576	20833576
AT3G56210		permissive	chr3	-	No	20852502-20852503	20852502-20852503	No	20852502	20852502
AT3G56230		non-targets	chr3	-	No	20860777-20860778	20860784-20860785	Yes	20860777	20860784
AT3G56310		stringent	chr3	+	No	20885870-20885871	20885870-20885871	No	20885870	20885870
AT3G56400	ATWRKY70|WRKY70	non-targets	chr3	-	No	20908932-20908933	20908932-20908933	No	20908932	20908932
AT3G56510		permissive	chr3	-	No	20944115-20944116	20944110-20944111	Yes	20944115	20944110
AT3G56860	UBA2A	permissive	chr3	-	No	21050157-21050158	21050143-21050144	Yes	21050157	21050143
AT3G56990	EDA7	permissive	chr3	-	No	21088259-21088260	21088259-21088260	No	21088259	21088259
AT3G57060		non-targets	chr3	-	No	21114824-21114825	21114856-21114857	Yes	21114824	21114856
AT3G57062		permissive	chr3	+	No	21121875-21121876	21121876-21121877	Yes	21121875	21121876
AT3G57080	NRPE5|RPB5B	non-targets	chr3	+	No	21127616-21127617	21127625-21127626	Yes	21127616	21127625
AT3G57200		non-targets	chr3	+	Yes	21172301-21172302	21172372-21172373	Yes	21172301	21172372
AT3G57230	AGL16	non-targets	chr3	+	No	21180903-21180904	21180860-21180861	Yes	21180903	21180860
AT3G57300	ATINO80|INO80	permissive	chr3	+	No	21207833-21207834	21207889-21207890	Yes	21207833	21207889
AT3G57410	ATVLN3|VLN3	stringent	chr3	-	No	21243161-21243162	21243161-21243162	No	21243161	21243161
AT3G57630		non-targets	chr3	-	No	21339335-21339336	21339335-21339336	No	21339335	21339335
AT3G58610		stringent	chr3	+	No	21674796-21674797	21674796-21674797	No	21674796	21674796
AT3G59710		non-targets	chr3	-	No	22054888-22054889	22054748-22054749	Yes	22054888	22054748
AT3G59770	AtSAC9|SAC9	permissive	chr3	-	No	22079080-22079081	22079079-22079080	Yes	22079080	22079079
AT3G60360	EDA14|UTP11	non-targets	chr3	-	No	22312289-22312290	22312308-22312309	Yes	22312289	22312308
AT3G60510		non-targets	chr3	-	Yes	22356968-22356969	22356951-22356952	Yes	22356968	22356951
AT3G60830	ARP7|ATARP7	permissive	chr3	+	No	22476122-22476123	22476133-22476134	Yes	22476122	22476133
AT3G60860		permissive	chr3	+	No	22491722-22491723	22491627-22491628	Yes	22491722	22491627
AT3G61570	GC3|GDAP1	permissive	chr3	-	No	22779440-22779441	22779443-22779444	Yes	22779440	22779443
AT3G61760	ADL1B|DL1B	non-targets	chr3	-	Yes	22860327-22860328	22860356-22860357	Yes	22860327	22860356
AT3G61898		non-targets	chr3	+	No	22922903-22922904	22922903-22922904	No	22922903	22922903
AT3G62700	ABCC14|ATMRP10|MRP10	stringent	chr3	-	No	23190266-23190267	23190266-23190267	No	23190266	23190266
AT3G62980	AtTIR1|TIR1	stringent	chr3	-	No	23273120-23273121	23273192-23273193	Yes	23273120	23273192
AT3G63080	ATGPX5|GPX5|MEE42	non-targets	chr3	+	No	23311366-23311367	23311369-23311370	Yes	23311366	23311369
AT3G63210	MARD1	non-targets	chr3	-	No	23353640-23353641	23353740-23353741	Yes	23353640	23353740
AT3G63380		non-targets	chr3	-	No	23406585-23406586	23406506-23406507	Yes	23406585	23406506
AT3G63420	AGG1|ATAGG1|GG1	non-targets	chr3	+	No	23418627-23418628	23418638-23418639	Yes	23418627	23418638
AT3G63460		stringent	chr3	-	No	23430796-23430797	23430796-23430797	No	23430796	23430796
AT3G63470	scpl40	non-targets	chr3	+	No	23441008-23441009	23440975-23440976	Yes	23441008	23440975
AT4G00585		stringent	chr4	-	No	250962-250963	250962-250963	No	250962	250962
AT4G00660	ATRH8|RH8	permissive	chr4	+	No	278196-278197	278196-278197	No	278196	278196
AT4G00730	AHDP|ANL2	non-targets	chr4	-	Yes	299296-299297	304386-304387	Yes	299296	304386
AT4G00740	QUA3	stringent	chr4	-	No	307406-307407	307434-307435	Yes	307406	307434
AT4G01330		non-targets	chr4	+	No	552978-552979	552977-552978	Yes	552978	552977
AT4G01670		non-targets	chr4	-	No	711192-711193	711192-711193	No	711192	711192
AT4G01710	ARPC5|CRK	non-targets	chr4	+	No	736602-736603	736602-736603	No	736602	736602
AT4G01720	AtWRKY47|WRKY47	non-targets	chr4	+	No	748570-748571	748557-748558	Yes	748570	748557
AT4G01840	ATKCO5|ATTPK5|KCO5|TPK5	non-targets	chr4	+	Yes	795132-795133	793719-793720	Yes	795132	793719
AT4G01850	AtSAM2|MAT2|SAM-2|SAM2	stringent	chr4	-	No	796182-796183	796182-796183	No	796182	796182
AT4G02715		permissive	chr4	-	No	1200891-1200892	1200891-1200892	No	1200891	1200891
AT4G02860		non-targets	chr4	-	No	1268646-1268647	1268706-1268707	Yes	1268646	1268706
AT4G02890	UBQ14	non-targets	chr4	-	No	1278574-1278575	1278574-1278575	No	1278574	1278574
AT4G02940		permissive	chr4	+	No	1310924-1310925	1310924-1310925	No	1310924	1310924
AT4G03020		permissive	chr4	-	No	1331394-1331395	1331394-1331395	No	1331394	1331394
AT4G03260		stringent	chr4	+	No	1431634-1431635	1431665-1431666	Yes	1431634	1431665
AT4G03390	SRF3	non-targets	chr4	-	No	1490464-1490465	1490464-1490465	No	1490464	1490464
AT4G03500		non-targets	chr4	+	Yes	1553698-1553699	1556665-1556666	Yes	1553698	1556665
AT4G03510	ATRMA1|RMA1	non-targets	chr4	-	No	1557818-1557819	1557767-1557768	Yes	1557818	1557767
AT4G04840	ATMSRB6|MSRB6	non-targets	chr4	+	No	2451576-2451577	2451553-2451554	Yes	2451576	2451553
AT4G04880		non-targets	chr4	-	Yes	2464893-2464894	2464898-2464899	Yes	2464893	2464898
AT4G04925		non-targets	chr4	+	Yes	2506956-2506957	2506896-2506897	Yes	2506956	2506896
AT4G05150		non-targets	chr4	+	No	2662892-2662893	2662892-2662893	No	2662892	2662892
AT4G05450	ATMFDX1|MFDX1	non-targets	chr4	+	Yes	2758844-2758845	2760885-2760886	Yes	2758844	2760885
AT4G06701		permissive	chr4	-	No	3939578-3939579	3939596-3939597	Yes	3939578	3939596
AT4G06746	DEAR5|RAP2.9	non-targets	chr4	-	No	4073980-4073981	4073980-4073981	No	4073980	4073980
AT4G08170		permissive	chr4	-	Yes	5163351-5163352	5163533-5163534	Yes	5163351	5163533
AT4G08240		permissive	chr4	+	No	5196767-5196768	5196767-5196768	No	5196767	5196767
AT4G08280		stringent	chr4	+	No	5232190-5232191	5232194-5232195	Yes	5232190	5232194
AT4G08520		stringent	chr4	+	No	5420501-5420502	5420501-5420502	No	5420501	5420501
AT4G08700	ATPUP13	non-targets	chr4	-	No	5565859-5565860	NA	NA	5565859	NA
AT4G08980	FBW2	non-targets	chr4	+	No	5760249-5760250	5760251-5760252	Yes	5760249	5760251
AT4G10070		non-targets	chr4	-	Yes	6295411-6295412	6299165-6299166	Yes	6295411	6299165
AT4G10390		non-targets	chr4	-	Yes	6441638-6441639	6441784-6441785	Yes	6441638	6441784
AT4G10810		non-targets	chr4	-	No	6645779-6645780	6645831-6645832	Yes	6645779	6645831
AT4G10890		non-targets	chr4	+	Yes	6693135-6693136	6693797-6693798	Yes	6693135	6693797
AT4G10960	UGE5	non-targets	chr4	-	No	6715883-6715884	6715883-6715884	No	6715883	6715883
AT4G11020		non-targets	chr4	-	No	NA	6735462-6735463	NA	NA	6735462
AT4G11380		permissive	chr4	+	No	6925660-6925661	6925661-6925662	Yes	6925660	6925661
AT4G11830	PLDGAMMA2	non-targets	chr4	-	No	7120217-7120218	7120232-7120233	Yes	7120217	7120232
AT4G12000		non-targets	chr4	-	No	7193323-7193324	7193323-7193324	No	7193323	7193323
AT4G12070		non-targets	chr4	+	No	7234472-7234473	7234393-7234394	Yes	7234472	7234393
AT4G12400	Hop3	non-targets	chr4	-	No	7338705-7338706	7338674-7338675	Yes	7338705	7338674
AT4G12610	ATRAP74|RAP74	permissive	chr4	+	No	7457633-7457634	7457630-7457631	Yes	7457633	7457630
AT4G12640		non-targets	chr4	+	No	7467861-7467862	7467861-7467862	No	7467861	7467861
AT4G12880	AtENODL19|ENODL19	permissive	chr4	-	No	7544387-7544388	7544388-7544389	Yes	7544387	7544388
AT4G12990		non-targets	chr4	-	No	7594442-7594443	7594403-7594404	Yes	7594442	7594403
AT4G13670	PTAC5	non-targets	chr4	+	Yes	7950907-7950908	7950550-7950551	Yes	7950907	7950550
AT4G13830	J20	non-targets	chr4	+	No	8012752-8012753	8012752-8012753	No	8012752	8012752
AT4G13970		non-targets	chr4	-	Yes	8073682-8073683	8070161-8070162	Yes	8073682	8070161
AT4G14147	ARPC4	non-targets	chr4	-	Yes	8155057-8155058	8153892-8153893	Yes	8155057	8153892
AT4G14300		permissive	chr4	+	Yes	8233010-8233011	8233687-8233688	Yes	8233010	8233687
AT4G14360		non-targets	chr4	-	No	8267682-8267683	8267717-8267718	Yes	8267682	8267717
AT4G14550	IAA14|SLR	non-targets	chr4	-	No	8348409-8348410	8348409-8348410	No	8348409	8348409
AT4G14760	NET1B	non-targets	chr4	+	No	8481203-8481204	8481191-8481192	Yes	8481203	8481191
AT4G14950	KMS1	permissive	chr4	+	No	8548043-8548044	8548020-8548021	Yes	8548043	8548020
AT4G15340	04C11|ATPEN1|PEN1	non-targets	chr4	-	No	8759418-8759419	8759359-8759360	Yes	8759418	8759359
AT4G15920	AtSWEET17|SWEET17	non-targets	chr4	-	No	9030529-9030530	9030594-9030595	Yes	9030529	9030594
AT4G16144	AMSH3	non-targets	chr4	-	No	9137852-9137853	9137869-9137870	Yes	9137852	9137869
AT4G16280	FCA	non-targets	chr4	-	No	9206679-9206680	9206694-9206695	Yes	9206679	9206694
AT4G16400		non-targets	chr4	+	No	9261034-9261035	9261039-9261040	Yes	9261034	9261039
AT4G16535		non-targets	chr4	+	No	9315876-9315877	9315879-9315880	Yes	9315876	9315879
AT4G16660		permissive	chr4	+	No	9381464-9381465	9381464-9381465	No	9381464	9381464
AT4G17140		permissive	chr4	-	No	9613330-9613331	9613393-9613394	Yes	9613330	9613393
AT4G17230	SCL13	non-targets	chr4	-	No	9660985-9660986	9660985-9660986	No	9660985	9660985
AT4G17410		non-targets	chr4	+	No	9716357-9716358	9716442-9716443	Yes	9716357	9716442
AT4G17570	GATA26	non-targets	chr4	-	No	9783885-9783886	9783883-9783884	Yes	9783885	9783883
AT4G18020	APRR2|PRR2	non-targets	chr4	-	No	10003333-10003334	10003202-10003203	Yes	10003333	10003202
AT4G18140	SSP4b	non-targets	chr4	-	No	10047014-10047015	10047020-10047021	Yes	10047014	10047020
AT4G18530		non-targets	chr4	+	No	10220479-10220480	10220479-10220480	No	10220479	10220479
AT4G18700	ATWL4|CIPK12|PKS8|SnRK3.9|WL4	non-targets	chr4	-	No	10288802-10288803	10288801-10288802	Yes	10288802	10288801
AT4G18760	AtRLP51|RLP51|SNC2	non-targets	chr4	-	No	10307857-10307858	10307857-10307858	No	10307857	10307857
AT4G19030	AT-NLM1|ATNLM1|NIP1;1|NLM1	non-targets	chr4	-	No	10421533-10421534	10421533-10421534	No	10421533	10421533
AT4G19110		permissive	chr4	-	No	10454529-10454530	10454528-10454529	Yes	10454529	10454528
AT4G19120	ERD3	permissive	chr4	-	Yes	10460675-10460676	10460353-10460354	Yes	10460675	10460353
AT4G19160		non-targets	chr4	+	No	10480119-10480120	10480119-10480120	No	10480119	10480119
AT4G19200		stringent	chr4	+	No	10500668-10500669	10500668-10500669	No	10500668	10500668
AT4G19410		stringent	chr4	-	NA	10582080-10582081	10582080-10582081	No	10582080	10582080
AT4G19490	ATVPS54|VPS54	permissive	chr4	+	No	10623500-10623501	10623485-10623486	Yes	10623500	10623485
AT4G19600	CYCT1;4	non-targets	chr4	+	Yes	10676676-10676677	10676861-10676862	Yes	10676676	10676861
AT4G19670		permissive	chr4	-	No	10699205-10699206	10699205-10699206	No	10699205	10699205
AT4G20210	TPS08	non-targets	chr4	-	No	10913439-10913440	10913520-10913521	Yes	10913439	10913520
AT4G20300		non-targets	chr4	+	No	10959161-10959162	10959161-10959162	No	10959161	10959161
AT4G20400	JMJ14|PKDM7B	permissive	chr4	+	No	11013805-11013806	11013805-11013806	No	11013805	11013805
AT4G20830		non-targets	chr4	+	No	11157307-11157308	11157307-11157308	No	11157307	11157307
AT4G20880		non-targets	chr4	-	No	11179144-11179145	11179089-11179090	Yes	11179144	11179089
AT4G21700		non-targets	chr4	+	Yes	11532970-11532971	11532992-11532993	Yes	11532970	11532992
AT4G21860	MSRB2	stringent	chr4	-	No	11600099-11600100	11600099-11600100	No	11600099	11600099
AT4G22010	sks4	permissive	chr4	+	No	11666714-11666715	11666710-11666711	Yes	11666714	11666710
AT4G22160		permissive	chr4	+	No	11734025-11734026	11734011-11734012	Yes	11734025	11734011
AT4G22530		non-targets	chr4	-	No	11859133-11859134	11859133-11859134	No	11859133	11859133
AT4G22610		non-targets	chr4	-	No	11902104-11902105	11902104-11902105	No	11902104	11902104
AT4G23050		non-targets	chr4	+	Yes	12083865-12083866	12084139-12084140	Yes	12083865	12084139
AT4G23270	CRK19	non-targets	chr4	+	No	12173924-12173925	12173937-12173938	Yes	12173924	12173937
AT4G23530		non-targets	chr4	+	Yes	12280560-12280561	12280857-12280858	Yes	12280560	12280857
AT4G23680		non-targets	chr4	-	Yes	12336223-12336224	12336185-12336186	Yes	12336223	12336185
AT4G23700	ATCHX17|CHX17	non-targets	chr4	-	No	12342395-12342396	12342420-12342421	Yes	12342395	12342420
AT4G23895		non-targets	chr4	+	NA	12424245-12424246	12426443-12426444	Yes	12424245	12426443
AT4G24080	ALL1	non-targets	chr4	+	Yes	12512471-12512472	12512448-12512449	Yes	12512471	12512448
AT4G24340		non-targets	chr4	+	No	12609251-12609252	12609251-12609252	No	12609251	12609251
AT4G24580	REN1	non-targets	chr4	-	No	12688649-12688650	12688546-12688547	Yes	12688649	12688546
AT4G24680	MOS1	non-targets	chr4	+	No	12740052-12740053	12740107-12740108	Yes	12740052	12740107
AT4G24920		stringent	chr4	-	No	12819564-12819565	12819564-12819565	No	12819564	12819564
AT4G25230	RIN2	non-targets	chr4	+	No	12929153-12929154	12929153-12929154	No	12929153	12929153
AT4G25434	ATNUDT10|NUDT10	non-targets	chr4	-	No	13003728-13003729	13003721-13003722	Yes	13003728	13003721
AT4G25550		stringent	chr4	+	No	13051158-13051159	13051099-13051100	Yes	13051158	13051099
AT4G25710		permissive	chr4	-	No	13098142-13098143	13098142-13098143	No	13098142	13098142
AT4G26630		stringent	chr4	-	No	13430527-13430528	13430527-13430528	No	13430527	13430527
AT4G26965		permissive	chr4	+	No	13542394-13542395	13542389-13542390	Yes	13542394	13542389
AT4G27120		non-targets	chr4	-	No	13602045-13602046	13602045-13602046	No	13602045	13602045
AT4G27320	ATPHOS34|PHOS34	stringent	chr4	-	No	13678502-13678503	13678482-13678483	Yes	13678502	13678482
AT4G27380		permissive	chr4	+	No	13703149-13703150	13703149-13703150	No	13703149	13703149
AT4G27410	ANAC072|RD26	non-targets	chr4	-	No	13707692-13707693	13707692-13707693	No	13707692	13707692
AT4G27430	CIP7	non-targets	chr4	+	No	13723010-13723011	13723029-13723030	Yes	13723010	13723029
AT4G27590		non-targets	chr4	+	Yes	13772042-13772043	13771855-13771856	Yes	13772042	13771855
AT4G27652		non-targets	chr4	+	No	13810353-13810354	13810353-13810354	No	13810353	13810353
AT4G27860	MEB1	non-targets	chr4	+	No	13876346-13876347	13876346-13876347	No	13876346	13876346
AT4G28220	NDB1	permissive	chr4	+	No	13995786-13995787	13995795-13995796	Yes	13995786	13995795
AT4G28290		non-targets	chr4	-	No	14011855-14011856	14011843-14011844	Yes	14011855	14011843
AT4G28550		non-targets	chr4	+	No	14113728-14113729	14113749-14113750	Yes	14113728	14113749
AT4G28860	ckl4	permissive	chr4	+	No	14249492-14249493	14249492-14249493	No	14249492	14249492
AT4G28880	ckl3	permissive	chr4	+	No	14254478-14254479	14254397-14254398	Yes	14254478	14254397
AT4G28980	CAK1AT|CDKF;1	non-targets	chr4	+	No	14290701-14290702	14290699-14290700	Yes	14290701	14290699
AT4G29010	AIM1	stringent	chr4	-	No	14297063-14297064	14297125-14297126	Yes	14297063	14297125
AT4G29070		non-targets	chr4	+	No	14323255-14323256	14323295-14323296	Yes	14323255	14323295
AT4G29490		permissive	chr4	+	No	14491517-14491518	14491432-14491433	Yes	14491517	14491432
AT4G29930		non-targets	chr4	+	No	14647585-14647586	14647626-14647627	Yes	14647585	14647626
AT4G30240		non-targets	chr4	-	No	14807942-14807943	14807972-14807973	Yes	14807942	14807972
AT4G30350	SMXL2	non-targets	chr4	+	No	14847991-14847992	14847991-14847992	No	14847991	14847991
AT4G30410		non-targets	chr4	-	No	14871108-14871109	14871108-14871109	No	14871108	14871108
AT4G30470		non-targets	chr4	+	No	14896641-14896642	14896641-14896642	No	14896641	14896641
AT4G30530	GGP1	stringent	chr4	+	No	14922453-14922454	14922453-14922454	No	14922453	14922453
AT4G30620		stringent	chr4	-	Yes	14948562-14948563	14948592-14948593	Yes	14948562	14948592
AT4G30790		non-targets	chr4	-	Yes	14998529-14998530	14993097-14993098	Yes	14998529	14993097
AT4G31100		non-targets	chr4	+	No	15126581-15126582	15126513-15126514	Yes	15126581	15126513
AT4G31580	At-RSZ22|AtRSZ22|RSZ22|RSZP22|SRZ-22|SRZ22	permissive	chr4	+	No	15308341-15308342	15308341-15308342	No	15308341	15308341
AT4G31750	WIN2	permissive	chr4	-	No	15364432-15364433	15364432-15364433	No	15364432	15364432
AT4G32150	ATVAMP711|VAMP711	stringent	chr4	-	No	15526128-15526129	15526218-15526219	Yes	15526128	15526218
AT4G32440		non-targets	chr4	+	No	15658889-15658890	15658917-15658918	Yes	15658889	15658917
AT4G32560		non-targets	chr4	+	No	15716255-15716256	15716255-15716256	No	15716255	15716255
AT4G32590		non-targets	chr4	+	No	15722867-15722868	15722867-15722868	No	15722867	15722867
AT4G32780		non-targets	chr4	+	Yes	15811874-15811875	15811899-15811900	Yes	15811874	15811899
AT4G32850	nPAP|PAP(IV)	non-targets	chr4	+	No	15854876-15854877	15854793-15854794	Yes	15854876	15854793
AT4G32880	ATHB-8|ATHB8|HB-8	non-targets	chr4	-	No	15863457-15863458	15863454-15863455	Yes	15863457	15863454
AT4G32920		non-targets	chr4	-	No	15887797-15887798	15887820-15887821	Yes	15887797	15887820
AT4G33300	ADR1-L1	non-targets	chr4	-	No	16055985-16055986	16055985-16055986	No	16055985	16055985
AT4G33920	APD5	non-targets	chr4	+	No	16262977-16262978	16262880-16262881	Yes	16262977	16262880
AT4G34135	UGT73B2	non-targets	chr4	-	No	16345367-16345368	16345367-16345368	No	16345367	16345367
AT4G34140		non-targets	chr4	+	Yes	16354300-16354301	16352187-16352188	Yes	16354300	16352187
AT4G34215		stringent	chr4	-	No	16379625-16379626	16379625-16379626	No	16379625	16379625
AT4G34410	RRTF1	non-targets	chr4	+	No	16453001-16453002	16452958-16452959	Yes	16453001	16452958
AT4G34430	ATSWI3D|CHB3	non-targets	chr4	+	No	16465341-16465342	16465341-16465342	No	16465341	16465341
AT4G34450		stringent	chr4	+	No	16476974-16476975	16476974-16476975	No	16476974	16476974
AT4G35390	AGF1	non-targets	chr4	+	Yes	16829544-16829545	16830709-16830710	Yes	16829544	16830709
AT4G35780	STY17	non-targets	chr4	-	No	16946520-16946521	16946520-16946521	No	16946520	16946520
AT4G35790	ATPLDDELTA|PLDDELTA	permissive	chr4	-	No	16955633-16955634	16955633-16955634	No	16955633	16955633
AT4G35800	NRPB1|RNA_POL_II_LS|RNA_POL_II_LSRNA_POL_II_LS|RPB1	stringent	chr4	-	No	16960677-16960678	16960663-16960664	Yes	16960677	16960663
AT4G35860	ATGB2|ATRAB2C|ATRABB1B|GB2	permissive	chr4	-	No	16986893-16986894	16986893-16986894	No	16986893	16986893
AT4G36890	IRX14	non-targets	chr4	-	No	17379260-17379261	17379243-17379244	Yes	17379260	17379243
AT4G36980		non-targets	chr4	-	No	17433642-17433643	17433666-17433667	Yes	17433642	17433666
AT4G37070	AtPLAIVA|PLA IVA|PLP1	non-targets	chr4	-	No	17464802-17464803	17464802-17464803	No	17464802	17464802
AT4G37470	KAI2	non-targets	chr4	-	No	17616854-17616855	17616854-17616855	No	17616854	17616854
AT4G37730	AtbZIP7|bZIP7	non-targets	chr4	+	Yes	17725025-17725026	17724722-17724723	Yes	17725025	17724722
AT4G37850		non-targets	chr4	-	Yes	17796158-17796159	17796023-17796024	Yes	17796158	17796023
AT4G37940	AGL21	non-targets	chr4	-	No	17835324-17835325	17835324-17835325	No	17835324	17835324
AT4G38240	CGL|CGL1|GNTI	non-targets	chr4	-	No	17931569-17931570	17931674-17931675	Yes	17931569	17931674
AT4G38270	GAUT3	non-targets	chr4	+	No	17941554-17941555	17941554-17941555	No	17941554	17941554
AT4G38730		non-targets	chr4	-	No	18080292-18080293	18080312-18080313	Yes	18080292	18080312
AT4G38810		non-targets	chr4	-	No	18115282-18115283	18115358-18115359	Yes	18115282	18115358
AT4G38860		non-targets	chr4	+	Yes	18131146-18131147	18130934-18130935	Yes	18131146	18130934
AT4G39030	EDS5|SCORD3|SID1	non-targets	chr4	+	No	18189075-18189076	18189075-18189076	No	18189075	18189075
AT4G39160		non-targets	chr4	+	No	18239894-18239895	18239841-18239842	Yes	18239894	18239841
AT4G39170		permissive	chr4	+	No	18243801-18243802	18243806-18243807	Yes	18243801	18243806
AT4G39300		permissive	chr4	+	No	18287994-18287995	18287994-18287995	No	18287994	18287994
AT4G39840		non-targets	chr4	+	No	18486810-18486811	18486810-18486811	No	18486810	18486810
AT4G39920	POR|TFC C	non-targets	chr4	+	Yes	18517300-18517301	18517107-18517108	Yes	18517300	18517107
AT5G01040	LAC8	non-targets	chr5	-	No	13189-13190	13189-13190	No	13189	13189
AT5G01200		non-targets	chr5	+	No	78406-78407	78406-78407	No	78406	78406
AT5G01800		stringent	chr5	+	No	308841-308842	308841-308842	No	308841	308841
AT5G01820	ATCIPK14|ATSR1|CIPK14|PKS24|SnRK3.15|SR1	non-targets	chr5	-	Yes	313395-313396	313216-313217	Yes	313395	313216
AT5G01840	ATOFP1|OFP1	non-targets	chr5	+	Yes	325465-325466	325357-325358	Yes	325465	325357
AT5G01990		non-targets	chr5	-	No	377201-377202	377200-377201	Yes	377201	377200
AT5G02060		non-targets	chr5	+	Yes	405797-405798	405820-405821	Yes	405797	405820
AT5G02170		non-targets	chr5	+	No	430661-430662	430692-430693	Yes	430661	430692
AT5G02230		non-targets	chr5	+	No	450652-450653	450652-450653	No	450652	450652
AT5G02260	ATEXP9|ATEXPA9|ATHEXP ALPHA 1.10|EXP9|EXPA9	non-targets	chr5	+	No	465252-465253	465252-465253	No	465252	465252
AT5G02310	PRT6	permissive	chr5	+	No	482908-482909	482773-482774	Yes	482908	482773
AT5G02600	NAKR1|NPCC6	non-targets	chr5	-	No	585559-585560	585585-585586	Yes	585559	585585
AT5G03050		permissive	chr5	-	Yes	715032-715033	NA	NA	715032	NA
AT5G03110		non-targets	chr5	+	Yes	731469-731470	730812-730813	Yes	731469	730812
AT5G03150	JKD	non-targets	chr5	+	Yes	745641-745642	749012-749013	Yes	745641	749012
AT5G03170	ATFLA11|FLA11	non-targets	chr5	-	Yes	752779-752780	752723-752724	Yes	752779	752723
AT5G03560		non-targets	chr5	-	No	900462-900463	900462-900463	No	900462	900462
AT5G03610		non-targets	chr5	+	No	918471-918472	918471-918472	No	918471	918471
AT5G03720	AT-HSFA3|HSFA3	non-targets	chr5	-	No	973079-973080	973000-973001	Yes	973079	973000
AT5G04090		non-targets	chr5	-	No	1105403-1105404	1105421-1105422	Yes	1105403	1105421
AT5G04740	ACR12	stringent	chr5	-	No	1368554-1368555	1368554-1368555	No	1368554	1368554
AT5G05600		non-targets	chr5	+	No	1674708-1674709	1674708-1674709	No	1674708	1674708
AT5G05610	AL1	non-targets	chr5	-	No	1677025-1677026	1676985-1676986	Yes	1677025	1676985
AT5G05660	ATNFXL2|EBI|NFXL2	permissive	chr5	-	No	1690860-1690861	1690858-1690859	Yes	1690860	1690858
AT5G06120		non-targets	chr5	+	No	1852986-1852987	1852986-1852987	No	1852986	1852986
AT5G06265		non-targets	chr5	+	No	1908350-1908351	1908350-1908351	No	1908350	1908350
AT5G06280		non-targets	chr5	-	No	1918275-1918276	1918279-1918280	Yes	1918275	1918279
AT5G06300	LOG7	non-targets	chr5	-	No	1921743-1921744	1921743-1921744	No	1921743	1921743
AT5G06530	ABCG22|AtABCG22	non-targets	chr5	-	Yes	1989810-1989811	1993761-1993762	Yes	1989810	1993761
AT5G06640	EXT10	non-targets	chr5	-	No	2039710-2039711	2039712-2039713	Yes	2039710	2039712
AT5G06700	TBR	permissive	chr5	+	Yes	2063735-2063736	2066034-2066035	Yes	2063735	2066034
AT5G06730		non-targets	chr5	-	Yes	2079921-2079922	2079979-2079980	Yes	2079921	2079979
AT5G06839	bZIP65|TGA10	non-targets	chr5	+	No	2126453-2126454	2126453-2126454	No	2126453	2126453
AT5G07030		non-targets	chr5	-	No	2183426-2183427	2183426-2183427	No	2183426	2183426
AT5G07740		non-targets	chr5	-	No	2458625-2458626	2458629-2458630	Yes	2458625	2458629
AT5G07820		non-targets	chr5	-	No	2498749-2498750	2498748-2498749	Yes	2498749	2498748
AT5G07890		non-targets	chr5	-	No	2517267-2517268	2517406-2517407	Yes	2517267	2517406
AT5G08130	BIM1	non-targets	chr5	-	No	2606232-2606233	2606224-2606225	Yes	2606232	2606224
AT5G08330	AtTCP11|TCP11	non-targets	chr5	+	No	2681637-2681638	2681638-2681639	Yes	2681637	2681638
AT5G08430		non-targets	chr5	+	No	2720317-2720318	2720306-2720307	Yes	2720317	2720306
AT5G08470	EMB2817|PEX1	permissive	chr5	+	Yes	2742957-2742958	2738449-2738450	Yes	2742957	2738449
AT5G08630		non-targets	chr5	-	No	2798239-2798240	2798255-2798256	Yes	2798239	2798255
AT5G09220	AAP2	non-targets	chr5	+	No	2869031-2869032	2869031-2869032	No	2869031	2869031
AT5G09450		non-targets	chr5	+	No	2943591-2943592	2943591-2943592	No	2943591	2943591
AT5G09850		permissive	chr5	-	No	3063252-3063253	3063250-3063251	Yes	3063252	3063250
AT5G09980	PROPEP4	non-targets	chr5	+	No	3123904-3123905	3123844-3123845	Yes	3123904	3123844
AT5G10130		permissive	chr5	-	No	3171398-3171399	3171398-3171399	No	3171398	3171398
AT5G10280	ATMYB64|ATMYB92|MYB92	non-targets	chr5	+	No	3234209-3234210	3234209-3234210	No	3234209	3234209
AT5G10350		permissive	chr5	-	No	3255409-3255410	3255433-3255434	Yes	3255409	3255433
AT5G10450	14-3-3lambda|AFT1|GRF6	stringent	chr5	-	No	3284229-3284230	3284229-3284230	No	3284229	3284229
AT5G11430		non-targets	chr5	+	Yes	3650808-3650809	3649192-3649193	Yes	3650808	3649192
AT5G11440	CID5|IPD1	non-targets	chr5	-	No	3652765-3652766	3652766-3652767	Yes	3652765	3652766
AT5G11500		stringent	chr5	+	No	3679203-3679204	3679172-3679173	Yes	3679203	3679172
AT5G11650		non-targets	chr5	+	Yes	3747134-3747135	3746959-3746960	Yes	3747134	3746959
AT5G11700		permissive	chr5	-	No	3762521-3762522	3762519-3762520	Yes	3762521	3762519
AT5G11790	NDL2	non-targets	chr5	+	No	3802774-3802775	3802791-3802792	Yes	3802774	3802791
AT5G12050		non-targets	chr5	+	Yes	3891467-3891468	3890290-3890291	Yes	3891467	3890290
AT5G12130	ATTERC|PDE149	non-targets	chr5	+	Yes	3922356-3922357	3922485-3922486	Yes	3922356	3922485
AT5G12170	CLT3	non-targets	chr5	+	No	3935076-3935077	3935076-3935077	No	3935076	3935076
AT5G12230	MED19A	non-targets	chr5	-	No	3953161-3953162	3953161-3953162	No	3953161	3953161
AT5G12330	LRP1	non-targets	chr5	-	No	3987510-3987511	3987512-3987513	Yes	3987510	3987512
AT5G12430	TPR16	permissive	chr5	-	No	4028021-4028022	4027982-4027983	Yes	4028021	4027982
AT5G12890		non-targets	chr5	-	Yes	4069581-4069582	4069534-4069535	Yes	4069581	4069534
AT5G13190	AtGILP|GILP	non-targets	chr5	-	No	4204850-4204851	4204815-4204816	Yes	4204850	4204815
AT5G13440		stringent	chr5	-	No	4308222-4308223	4308186-4308187	Yes	4308222	4308186
AT5G13460	IQD11	non-targets	chr5	+	No	4318374-4318375	4318379-4318380	Yes	4318374	4318379
AT5G13740	ZIF1	non-targets	chr5	+	No	4436653-4436654	4436572-4436573	Yes	4436653	4436572
AT5G14080		non-targets	chr5	-	Yes	4543106-4543107	4543084-4543085	Yes	4543106	4543084
AT5G14120		non-targets	chr5	+	No	4558703-4558704	4558703-4558704	No	4558703	4558703
AT5G14550		non-targets	chr5	-	No	4691156-4691157	4691185-4691186	Yes	4691156	4691185
AT5G14680		stringent	chr5	-	No	4731308-4731309	4731308-4731309	No	4731308	4731308
AT5G14690		non-targets	chr5	-	No	4733798-4733799	4733798-4733799	No	4733798	4733798
AT5G14730		non-targets	chr5	+	No	4757156-4757157	4757155-4757156	Yes	4757156	4757155
AT5G15150	ATHB-3|ATHB3|HAT7|HB-3	non-targets	chr5	-	No	4913703-4913704	4913703-4913704	No	4913703	4913703
AT5G15180		non-targets	chr5	+	No	4932364-4932365	4932364-4932365	No	4932364	4932364
AT5G15230	GASA4	permissive	chr5	+	No	4946200-4946201	4946200-4946201	No	4946200	4946200
AT5G15270		permissive	chr5	+	Yes	4961534-4961535	4962127-4962128	Yes	4961534	4962127
AT5G15400		non-targets	chr5	-	No	4997569-4997570	4997542-4997543	Yes	4997569	4997542
AT5G15460	MUB2	permissive	chr5	-	Yes	5018729-5018730	5019150-5019151	Yes	5018729	5019150
AT5G15730	AtCRLK2|CRLK2	permissive	chr5	+	Yes	5131701-5131702	5133226-5133227	Yes	5131701	5133226
AT5G16210		permissive	chr5	-	No	5290917-5290918	5290917-5290918	No	5290917	5290917
AT5G16490	RIC4	non-targets	chr5	-	No	5384362-5384363	5384362-5384363	No	5384362	5384362
AT5G16600	AtMYB43|MYB43	non-targets	chr5	+	No	5440355-5440356	5440355-5440356	No	5440355	5440355
AT5G16630	ATRAD4|RAD4	non-targets	chr5	+	No	5459615-5459616	5459617-5459618	Yes	5459615	5459617
AT5G16680		non-targets	chr5	-	No	5467354-5467355	5467354-5467355	No	5467354	5467354
AT5G16780	DOT2|MDF	permissive	chr5	-	No	5517544-5517545	5517549-5517550	Yes	5517544	5517549
AT5G16910	ATCSLD2|CSLD2	permissive	chr5	+	No	5565536-5565537	5565536-5565537	No	5565536	5565536
AT5G17020	ATCRM1|ATXPO1|HIT2|XPO1|XPO1A	stringent	chr5	+	No	5602897-5602898	5602929-5602930	Yes	5602897	5602929
AT5G17330	GAD|GAD1	stringent	chr5	+	No	5715055-5715056	5715055-5715056	No	5715055	5715055
AT5G17650		non-targets	chr5	-	No	5816737-5816738	5816823-5816824	Yes	5816737	5816823
AT5G17810	WOX12	non-targets	chr5	-	No	5880463-5880464	5880478-5880479	Yes	5880463	5880478
AT5G18120	APRL7|ATAPRL7	non-targets	chr5	+	No	5993885-5993886	5993936-5993937	Yes	5993885	5993936
AT5G18270	ANAC087	non-targets	chr5	-	No	6040959-6040960	6041044-6041045	Yes	6040959	6041044
AT5G18420		permissive	chr5	-	No	6105522-6105523	6105482-6105483	Yes	6105522	6105482
AT5G19070		non-targets	chr5	+	No	6377591-6377592	6377591-6377592	No	6377591	6377591
AT5G19110		non-targets	chr5	-	No	6411610-6411611	6411610-6411611	No	6411610	6411610
AT5G19140	AILP1|ATAILP1	non-targets	chr5	+	No	6426024-6426025	6426024-6426025	No	6426024	6426024
AT5G19230		non-targets	chr5	+	No	6468479-6468480	6468421-6468422	Yes	6468479	6468421
AT5G19380	CLT1	non-targets	chr5	-	No	6526812-6526813	6526812-6526813	No	6526812	6526812
AT5G19390		non-targets	chr5	+	No	6538388-6538389	6538388-6538389	No	6538388	6538388
AT5G19480		non-targets	chr5	+	Yes	6573573-6573574	6572584-6572585	Yes	6573573	6572584
AT5G19900		non-targets	chr5	-	No	6728159-6728160	6728159-6728160	No	6728159	6728159
AT5G19980	GONST4	non-targets	chr5	-	No	6749711-6749712	6749727-6749728	Yes	6749711	6749727
AT5G20200		permissive	chr5	+	Yes	6820517-6820518	6821658-6821659	Yes	6820517	6821658
AT5G20810		non-targets	chr5	+	No	7043902-7043903	7043902-7043903	No	7043902	7043902
AT5G20840		non-targets	chr5	-	No	7061254-7061255	7061254-7061255	No	7061254	7061254
AT5G21105		non-targets	chr5	+	No	7177813-7177814	7177799-7177800	Yes	7177813	7177799
AT5G21160	AtLARP1a|LARP1a	permissive	chr5	-	No	7198730-7198731	7198718-7198719	Yes	7198730	7198718
AT5G22000	RHF2A	stringent	chr5	+	No	7280120-7280121	7280153-7280154	Yes	7280120	7280153
AT5G22090		non-targets	chr5	-	No	7314633-7314634	7314597-7314598	Yes	7314633	7314597
AT5G22630	ADT5	non-targets	chr5	+	Yes	7526156-7526157	7524626-7524627	Yes	7526156	7524626
AT5G22780		permissive	chr5	-	No	7589829-7589830	7589829-7589830	No	7589829	7589829
AT5G22950	VPS24.1	non-targets	chr5	+	No	7682883-7682884	7682886-7682887	Yes	7682883	7682886
AT5G23090	NF-YB13	permissive	chr5	+	No	7750540-7750541	7750387-7750388	Yes	7750540	7750387
AT5G23100		non-targets	chr5	+	Yes	7753720-7753721	7754811-7754812	Yes	7753720	7754811
AT5G23450	ATLCBK1|LCBK1	permissive	chr5	-	No	7904774-7904775	7904756-7904757	Yes	7904774	7904756
AT5G23580	ATCDPK9|ATCPK12|CDPK9|CPK12	non-targets	chr5	-	Yes	7950347-7950348	7950192-7950193	Yes	7950347	7950192
AT5G23630	MIA|PDR2	permissive	chr5	-	No	7960542-7960543	7960551-7960552	Yes	7960542	7960551
AT5G23660	AtSWEET12|MTN3|SWEET12	non-targets	chr5	-	Yes	7973837-7973838	7971657-7971658	Yes	7973837	7971657
AT5G23760		non-targets	chr5	-	No	8013110-8013111	8013110-8013111	No	8013110	8013110
AT5G24090	ATCHIA|CHIA	non-targets	chr5	-	No	8143650-8143651	8143650-8143651	No	8143650	8143650
AT5G24140	SQP2	non-targets	chr5	-	No	8164345-8164346	8164346-8164347	Yes	8164345	8164346
AT5G24270	ATSOS3|CBL4|SOS3	non-targets	chr5	-	Yes	8242961-8242962	8238620-8238621	Yes	8242961	8238620
AT5G24352		permissive	chr5	+	No	8311809-8311810	8311809-8311810	No	8311809	8311809
AT5G24520	ATTTG1|TTG|TTG1|URM23	non-targets	chr5	-	No	8370673-8370674	8370686-8370687	Yes	8370673	8370686
AT5G24530	DMR6	non-targets	chr5	+	No	8383352-8383353	8383353-8383354	Yes	8383352	8383353
AT5G24620		non-targets	chr5	+	No	8432387-8432388	8432387-8432388	No	8432387	8432387
AT5G25060	RRC1	permissive	chr5	-	No	8634006-8634007	8633990-8633991	Yes	8634006	8633990
AT5G25080		permissive	chr5	+	No	8647056-8647057	8647056-8647057	No	8647056	8647056
AT5G25220	KNAT3	non-targets	chr5	+	No	8736160-8736161	8736160-8736161	No	8736160	8736160
AT5G25270		stringent	chr5	-	No	8757544-8757545	8757543-8757544	Yes	8757544	8757543
AT5G25280		non-targets	chr5	+	No	8774792-8774793	8774792-8774793	No	8774792	8774792
AT5G25440		non-targets	chr5	-	No	8854838-8854839	8854838-8854839	No	8854838	8854838
AT5G25460	DGR2	permissive	chr5	+	No	8865653-8865654	8865651-8865652	Yes	8865653	8865651
AT5G25890	IAA28|IAR2	non-targets	chr5	+	No	9034804-9034805	9034804-9034805	No	9034804	9034804
AT5G25940		stringent	chr5	-	No	9054133-9054134	9054133-9054134	No	9054133	9054133
AT5G26600		non-targets	chr5	+	No	9379519-9379520	9379519-9379520	No	9379519	9379519
AT5G26610		non-targets	chr5	+	No	9377099-9377100	9377099-9377100	No	9377099	9377099
AT5G26667	PYR6	stringent	chr5	+	No	9278566-9278567	9278566-9278567	No	9278566	9278566
AT5G27470		stringent	chr5	+	No	9697278-9697279	9697292-9697293	Yes	9697278	9697292
AT5G27610	ALY1|ATALY1	non-targets	chr5	+	Yes	9769924-9769925	9764944-9764945	Yes	9769924	9764944
AT5G27860		non-targets	chr5	-	No	9874840-9874841	9874830-9874831	Yes	9874840	9874830
AT5G27930		non-targets	chr5	-	No	9958118-9958119	9958118-9958119	No	9958118	9958118
AT5G27950		non-targets	chr5	+	No	9988007-9988008	9987872-9987873	Yes	9988007	9987872
AT5G28540	BIP1	permissive	chr5	-	No	10540523-10540524	10540593-10540594	Yes	10540523	10540593
AT5G33290	XGD1	non-targets	chr5	+	Yes	12558754-12558755	12562013-12562014	Yes	12558754	12562013
AT5G35330	ATMBD2|MBD02|MBD2	permissive	chr5	-	No	13523499-13523500	13523469-13523470	Yes	13523499	13523469
AT5G35460		non-targets	chr5	+	No	13674731-13674732	13674731-13674732	No	13674731	13674731
AT5G35910		permissive	chr5	-	No	14029606-14029607	14029679-14029680	Yes	14029606	14029679
AT5G36180	scpl1	non-targets	chr5	+	No	14242110-14242111	14242143-14242144	Yes	14242110	14242143
AT5G37660	PDLP7	non-targets	chr5	+	No	14961588-14961589	14961571-14961572	Yes	14961588	14961571
AT5G37790		permissive	chr5	-	No	15008222-15008223	15008141-15008142	Yes	15008222	15008141
AT5G38460		non-targets	chr5	-	Yes	15398277-15398278	15398408-15398409	Yes	15398277	15398408
AT5G38630	ACYB-1|CYB-1	permissive	chr5	+	No	15467644-15467645	15467657-15467658	Yes	15467644	15467657
AT5G38660	APE1	stringent	chr5	-	NA	15470966-15470967	15470966-15470967	No	15470966	15470966
AT5G38690		permissive	chr5	-	No	15481633-15481634	15481633-15481634	No	15481633	15481633
AT5G38720		non-targets	chr5	-	Yes	15509669-15509670	15509928-15509929	Yes	15509669	15509928
AT5G39380		non-targets	chr5	-	Yes	15758836-15758837	15761535-15761536	Yes	15758836	15761535
AT5G39660	CDF2	non-targets	chr5	+	No	15881022-15881023	15881022-15881023	No	15881022	15881022
AT5G40100		non-targets	chr5	+	No	16047531-16047532	16047463-16047464	Yes	16047531	16047463
AT5G40190		non-targets	chr5	-	No	16069182-16069183	16069179-16069180	Yes	16069182	16069179
AT5G40270		non-targets	chr5	-	No	16093218-16093219	16093218-16093219	No	16093218	16093218
AT5G40300		permissive	chr5	+	No	16112894-16112895	16113069-16113070	Yes	16112894	16113069
AT5G40340		non-targets	chr5	-	Yes	16133297-16133298	16131364-16131365	Yes	16133297	16131364
AT5G40450		non-targets	chr5	-	No	16184652-16184653	16184659-16184660	Yes	16184652	16184659
AT5G40470		non-targets	chr5	-	No	16208072-16208073	16208074-16208075	Yes	16208072	16208074
AT5G40530		permissive	chr5	+	No	16236249-16236250	16236275-16236276	Yes	16236249	16236275
AT5G40540		non-targets	chr5	+	No	16239589-16239590	16239589-16239590	No	16239589	16239589
AT5G40610	GPDHp	non-targets	chr5	-	No	16264921-16264922	16264921-16264922	No	16264921	16264921
AT5G40630		non-targets	chr5	-	No	16271118-16271119	16271118-16271119	No	16271118	16271118
AT5G40780	LHT1	non-targets	chr5	+	No	16327268-16327269	16327268-16327269	No	16327268	16327268
AT5G40870	ATUK/UPRT1|UK/UPRT1|UKL1	permissive	chr5	+	Yes	16378638-16378639	16378534-16378535	Yes	16378638	16378534
AT5G41360	ATXPB2|XPB2	non-targets	chr5	+	Yes	16544577-16544578	16549279-16549280	Yes	16544577	16549279
AT5G41370	ATXPB1|XPB1	permissive	chr5	+	Yes	16555886-16555887	16555993-16555994	Yes	16555886	16555993
AT5G41400		non-targets	chr5	-	No	16569377-16569378	16569377-16569378	No	16569377	16569377
AT5G41590		non-targets	chr5	-	Yes	16632171-16632172	16633495-16633496	Yes	16632171	16633495
AT5G41760		permissive	chr5	+	No	16709420-16709421	16709420-16709421	No	16709420	16709420
AT5G41790	CIP1	non-targets	chr5	+	Yes	16728274-16728275	16732773-16732774	Yes	16728274	16732773
AT5G41940		permissive	chr5	+	No	16785545-16785546	16785545-16785546	No	16785545	16785545
AT5G42250		non-targets	chr5	+	No	16897621-16897622	16897617-16897618	Yes	16897621	16897617
AT5G42300	UBL5	stringent	chr5	-	No	16912474-16912475	16912474-16912475	No	16912474	16912474
AT5G42390	SPP	stringent	chr5	+	No	16952996-16952997	16952996-16952997	No	16952996	16952996
AT5G42650	AOS|CYP74A|DDE2	non-targets	chr5	-	No	17097649-17097650	17097649-17097650	No	17097649	17097649
AT5G42740		stringent	chr5	+	No	17140819-17140820	17140819-17140820	No	17140819	17140819
AT5G42930		non-targets	chr5	-	No	17210553-17210554	17210566-17210567	Yes	17210553	17210566
AT5G42990	UBC18	stringent	chr5	-	No	17244047-17244048	17244048-17244049	Yes	17244047	17244048
AT5G43180		non-targets	chr5	-	No	17336335-17336336	17336384-17336385	Yes	17336335	17336384
AT5G43380	TOPP6	non-targets	chr5	-	No	17420047-17420048	17420047-17420048	No	17420047	17420047
AT5G43560		non-targets	chr5	+	No	17505684-17505685	17505686-17505687	Yes	17505684	17505686
AT5G43620		non-targets	chr5	+	Yes	17524001-17524002	17522951-17522952	Yes	17524001	17522951
AT5G43810	AGO10|PNH|ZLL	non-targets	chr5	+	No	17616888-17616889	17616750-17616751	Yes	17616888	17616750
AT5G44020		stringent	chr5	+	No	17714253-17714254	17714253-17714254	No	17714253	17714253
AT5G44160	AtIDD8|IDD8|NUC	non-targets	chr5	+	No	17775634-17775635	17775647-17775648	Yes	17775634	17775647
AT5G44240	ALA2	non-targets	chr5	+	No	17823702-17823703	17823699-17823700	Yes	17823702	17823699
AT5G44290		non-targets	chr5	-	No	17840457-17840458	17840427-17840428	Yes	17840457	17840427
AT5G44450		permissive	chr5	-	Yes	17914043-17914044	17914092-17914093	Yes	17914043	17914092
AT5G45030		non-targets	chr5	+	No	18175528-18175529	18175548-18175549	Yes	18175528	18175548
AT5G45280		non-targets	chr5	+	No	18349608-18349609	18349602-18349603	Yes	18349608	18349602
AT5G45580		non-targets	chr5	-	No	18480908-18480909	18480969-18480970	Yes	18480908	18480969
AT5G45920		non-targets	chr5	+	No	18624914-18624915	18624954-18624955	Yes	18624914	18624954
AT5G46150		permissive	chr5	-	Yes	18707645-18707646	18708498-18708499	Yes	18707645	18708498
AT5G46210	ATCUL4|CUL4	stringent	chr5	-	No	18731447-18731448	18731447-18731448	No	18731447	18731447
AT5G46410	SSP4	non-targets	chr5	+	No	18828481-18828482	18828512-18828513	Yes	18828481	18828512
AT5G46420		permissive	chr5	+	No	18832952-18832953	18832929-18832930	Yes	18832952	18832929
AT5G46560		non-targets	chr5	+	Yes	18890282-18890283	18890438-18890439	Yes	18890282	18890438
AT5G46760	MYC3	non-targets	chr5	+	No	18976336-18976337	18976335-18976336	Yes	18976336	18976335
AT5G47030		stringent	chr5	+	No	19092298-19092299	19092298-19092299	No	19092298	19092298
AT5G47050		non-targets	chr5	+	Yes	19107917-19107918	19108154-19108155	Yes	19107917	19108154
AT5G47140	GATA27	non-targets	chr5	+	No	19145078-19145079	19145078-19145079	No	19145078	19145078
AT5G47320	RPS19	non-targets	chr5	+	No	19205105-19205106	19205159-19205160	Yes	19205105	19205159
AT5G47430		non-targets	chr5	-	No	19240591-19240592	19240597-19240598	Yes	19240591	19240597
AT5G47455		non-targets	chr5	+	No	19252363-19252364	19252378-19252379	Yes	19252363	19252378
AT5G47480		permissive	chr5	+	No	19263397-19263398	19263397-19263398	No	19263397	19263397
AT5G47560	ATSDAT|ATTDT|TDT	non-targets	chr5	-	Yes	19287637-19287638	19289821-19289822	Yes	19287637	19289821
AT5G48030	GFA2	permissive	chr5	-	No	19466077-19466078	19466077-19466078	No	19466077	19466077
AT5G48110		non-targets	chr5	-	No	19501030-19501031	19500970-19500971	Yes	19501030	19500970
AT5G48530		non-targets	chr5	-	No	19666825-19666826	19666870-19666871	Yes	19666825	19666870
AT5G48655		permissive	chr5	-	No	19731162-19731163	19731162-19731163	No	19731162	19731162
AT5G48900		permissive	chr5	+	No	19829076-19829077	19829076-19829077	No	19829076	19829076
AT5G49360	ATBXL1|BXL1	non-targets	chr5	-	No	20011986-20011987	20011986-20011987	No	20011986	20011986
AT5G49680		permissive	chr5	+	No	20188564-20188565	20188564-20188565	No	20188564	20188564
AT5G49760		non-targets	chr5	+	No	20221298-20221299	20221298-20221299	No	20221298	20221298
AT5G49900		non-targets	chr5	-	No	20297150-20297151	20297122-20297123	Yes	20297150	20297122
AT5G50000		permissive	chr5	-	No	20342615-20342616	20342615-20342616	No	20342615	20342615
AT5G50010		non-targets	chr5	+	Yes	20350697-20350698	20350870-20350871	Yes	20350697	20350870
AT5G50150		non-targets	chr5	-	No	20402256-20402257	20402256-20402257	No	20402256	20402256
AT5G50460		stringent	chr5	-	No	20551474-20551475	20551474-20551475	No	20551474	20551474
AT5G50565		non-targets	chr5	+	No	20582082-20582083	20582099-20582100	Yes	20582082	20582099
AT5G50570	SPL13|SPL13A	non-targets	chr5	-	No	20582195-20582196	20582420-20582421	Yes	20582195	20582420
AT5G51410		non-targets	chr5	-	No	20881366-20881367	20881426-20881427	Yes	20881366	20881426
AT5G51660	ATCPSF160|CPSF160	permissive	chr5	+	Yes	20980078-20980079	20989500-20989501	Yes	20980078	20989500
AT5G52030		non-targets	chr5	+	No	21130076-21130077	21130060-21130061	Yes	21130076	21130060
AT5G52050		non-targets	chr5	+	No	21140642-21140643	21140642-21140643	No	21140642	21140642
AT5G52450		permissive	chr5	-	No	21288904-21288905	21288899-21288900	Yes	21288904	21288899
AT5G52530		non-targets	chr5	+	No	21321186-21321187	21321183-21321184	Yes	21321186	21321183
AT5G52830	ATWRKY27|WRKY27	non-targets	chr5	+	Yes	21412419-21412420	NA	NA	21412419	NA
AT5G52990		non-targets	chr5	+	No	21485282-21485283	21485282-21485283	No	21485282	21485282
AT5G53060	RCF3|SHI1	permissive	chr5	+	NA	21520420-21520421	21520420-21520421	No	21520420	21520420
AT5G53160	PYL8|RCAR3	non-targets	chr5	+	No	21562188-21562189	21562187-21562188	Yes	21562188	21562187
AT5G53290	CRF3	non-targets	chr5	-	Yes	21617775-21617776	21619218-21619219	Yes	21617775	21619218
AT5G53430	ATX5|SDG29|SET29	non-targets	chr5	+	No	21677217-21677218	NA	NA	21677217	NA
AT5G53440		permissive	chr5	-	No	21683497-21683498	21683399-21683400	Yes	21683497	21683399
AT5G53480	AtKPNB1|KPNB1	non-targets	chr5	+	No	21717321-21717322	21717321-21717322	No	21717321	21717321
AT5G53620		non-targets	chr5	+	No	21785183-21785184	21785213-21785214	Yes	21785183	21785213
AT5G53730	NHL26	non-targets	chr5	-	No	21807928-21807929	21807928-21807929	No	21807928	21807928
AT5G53880		non-targets	chr5	-	Yes	21872900-21872901	21872826-21872827	Yes	21872900	21872826
AT5G54080	AtHGO|HGO	non-targets	chr5	+	No	21948255-21948256	21948255-21948256	No	21948255	21948255
AT5G54140	ILL3	non-targets	chr5	+	No	21967935-21967936	NA	NA	21967935	NA
AT5G54390	AHL|ATAHL|HL	permissive	chr5	+	No	22087934-22087935	22087938-22087939	Yes	22087934	22087938
AT5G54730	ATATG18F|ATG18F|G18F	non-targets	chr5	-	No	22233765-22233766	22233765-22233766	No	22233765	22233765
AT5G54850		non-targets	chr5	-	No	22280620-22280621	22280582-22280583	Yes	22280620	22280582
AT5G54940		non-targets	chr5	-	No	22308272-22308273	22308272-22308273	No	22308272	22308272
AT5G55550		non-targets	chr5	-	No	22501655-22501656	22501674-22501675	Yes	22501655	22501674
AT5G55660		non-targets	chr5	+	No	22543472-22543473	22543473-22543474	Yes	22543472	22543473
AT5G56320	ATEXP14|ATEXPA14|ATHEXP ALPHA 1.5|EXP14|EXPA14	non-targets	chr5	+	No	22810236-22810237	22810229-22810230	Yes	22810236	22810229
AT5G56530		permissive	chr5	+	Yes	22891560-22891561	22891894-22891895	Yes	22891560	22891894
AT5G56550	ATOXS3|OXS3	non-targets	chr5	-	No	22895615-22895616	22895615-22895616	No	22895615	22895615
AT5G56980		non-targets	chr5	-	No	23056271-23056272	23056271-23056272	No	23056271	23056271
AT5G57000		non-targets	chr5	-	No	23063719-23063720	23063784-23063785	Yes	23063719	23063784
AT5G57140	ATPAP28|PAP28	non-targets	chr5	+	Yes	23151588-23151589	23151517-23151518	Yes	23151588	23151517
AT5G57270		permissive	chr5	-	No	23200632-23200633	23200610-23200611	Yes	23200632	23200610
AT5G57685	ATGDU3|GDU3|LSB1	non-targets	chr5	-	No	23366028-23366029	23366025-23366026	Yes	23366028	23366025
AT5G58040	ATFIP1[V]|ATFIPS5|FIP1[V]|FIPS5	non-targets	chr5	+	No	23489962-23489963	23489782-23489783	Yes	23489962	23489782
AT5G58070	ATTIL|TIL	permissive	chr5	-	No	23500359-23500360	23500359-23500360	No	23500359	23500359
AT5G58160		non-targets	chr5	+	No	23536032-23536033	23536032-23536033	No	23536032	23536032
AT5G58200		non-targets	chr5	+	No	23552098-23552099	23552049-23552050	Yes	23552098	23552049
AT5G58470	TAF15b	permissive	chr5	-	Yes	23638274-23638275	23637965-23637966	Yes	23638274	23637965
AT5G58510		permissive	chr5	-	No	23648199-23648200	23648263-23648264	Yes	23648199	23648263
AT5G58900		non-targets	chr5	-	No	23783122-23783123	23783160-23783161	Yes	23783122	23783160
AT5G58920		permissive	chr5	+	No	23794244-23794245	23794244-23794245	No	23794244	23794244
AT5G58990		non-targets	chr5	+	No	23816164-23816165	23816167-23816168	Yes	23816164	23816167
AT5G59020		non-targets	chr5	-	No	23826840-23826841	NA	NA	23826840	NA
AT5G59350		non-targets	chr5	+	No	23942156-23942157	23942156-23942157	No	23942156	23942156
AT5G59613		stringent	chr5	-	No	24015523-24015524	24015523-24015524	No	24015523	24015523
AT5G59920	ULI3	non-targets	chr5	+	Yes	24130360-24130361	24131026-24131027	Yes	24130360	24131026
AT5G60590		non-targets	chr5	+	Yes	24358795-24358796	24358643-24358644	Yes	24358795	24358643
AT5G60680		non-targets	chr5	+	No	24386914-24386915	24386914-24386915	No	24386914	24386914
AT5G61140		non-targets	chr5	+	No	24603504-24603505	24603505-24603506	Yes	24603504	24603505
AT5G61190		non-targets	chr5	+	Yes	24619963-24619964	24620006-24620007	Yes	24619963	24620006
AT5G61220		permissive	chr5	-	No	24625591-24625592	24625579-24625580	Yes	24625591	24625579
AT5G61310		permissive	chr5	-	Yes	24654328-24654329	24653440-24653441	Yes	24654328	24653440
AT5G61880		non-targets	chr5	+	No	24851799-24851800	24851755-24851756	Yes	24851799	24851755
AT5G61910		non-targets	chr5	-	NA	24855692-24855693	24855692-24855693	No	24855692	24855692
AT5G62090	SLK2	non-targets	chr5	-	No	24934963-24934964	24934960-24934961	Yes	24934963	24934960
AT5G62270	GCD1	non-targets	chr5	+	No	25014278-25014279	25014212-25014213	Yes	25014278	25014212
AT5G62600	MOS14	permissive	chr5	-	Yes	25122888-25122889	25123068-25123069	Yes	25122888	25123068
AT5G63130		non-targets	chr5	+	No	25324049-25324050	25324009-25324010	Yes	25324049	25324009
AT5G63320	NPX1	non-targets	chr5	-	No	25377095-25377096	25377099-25377100	Yes	25377095	25377099
AT5G63370	CDKG1	non-targets	chr5	-	No	25384640-25384641	25384640-25384641	No	25384640	25384640
AT5G63600	ATFLS5|FLS5	non-targets	chr5	-	No	25460830-25460831	25460830-25460831	No	25460830	25460830
AT5G63760	ARI15|ATARI15	non-targets	chr5	-	Yes	25516092-25516093	25515729-25515730	Yes	25516092	25515729
AT5G63770	ATDGK2|DGK2	permissive	chr5	+	No	25522715-25522716	25522712-25522713	Yes	25522715	25522712
AT5G63860	UVR8	stringent	chr5	-	No	25554545-25554546	25554545-25554546	No	25554545	25554545
AT5G63930		non-targets	chr5	+	No	25586562-25586563	25586562-25586563	No	25586562	25586562
AT5G63940		non-targets	chr5	+	No	25591398-25591399	25591479-25591480	Yes	25591398	25591479
AT5G64010		non-targets	chr5	-	No	25618514-25618515	25618608-25618609	Yes	25618514	25618608
AT5G64180		permissive	chr5	+	No	25678292-25678293	25678292-25678293	No	25678292	25678292
AT5G64200	At-SC35|ATSC35|SC35	permissive	chr5	-	No	25681589-25681590	25681589-25681590	No	25681589	25681589
AT5G64340	SAC51	non-targets	chr5	-	No	25730381-25730382	25730353-25730354	Yes	25730381	25730353
AT5G64360	EIP9	permissive	chr5	-	No	25736283-25736284	25736277-25736278	Yes	25736283	25736277
AT5G64390	HEN4	non-targets	chr5	+	No	25747535-25747536	25747531-25747532	Yes	25747535	25747531
AT5G64400		stringent	chr5	+	No	25750382-25750383	25750382-25750383	No	25750382	25750382
AT5G64410	ATOPT4|OPT4	non-targets	chr5	-	Yes	25750855-25750856	25753560-25753561	Yes	25750855	25753560
AT5G65050	AGL31|MAF2	permissive	chr5	+	No	25986366-25986367	25986366-25986367	No	25986366	25986366
AT5G65060	AGL70|FCL3|MAF3	non-targets	chr5	+	No	25991362-25991363	25991362-25991363	No	25991362	25991362
AT5G65340		non-targets	chr5	-	No	26113402-26113403	26113401-26113402	Yes	26113402	26113401
AT5G65480	CCI1	permissive	chr5	+	No	26177915-26177916	26177915-26177916	No	26177915	26177915
AT5G65630	GTE7	non-targets	chr5	-	No	26225836-26225837	26225836-26225837	No	26225836	26225836
AT5G65660		non-targets	chr5	-	No	26245338-26245339	26245338-26245339	No	26245338	26245338
AT5G65683	WAVH2	non-targets	chr5	+	Yes	26264022-26264023	26263828-26263829	Yes	26264022	26263828
AT5G65690	PCK2|PEPCK	non-targets	chr5	+	No	26269699-26269700	26269696-26269697	Yes	26269699	26269696
AT5G65780	ATBCAT-5	non-targets	chr5	+	NA	26318750-26318751	26318750-26318751	No	26318750	26318750
AT5G65790	ATMYB68|MYB68	non-targets	chr5	+	No	26324442-26324443	26324444-26324445	Yes	26324442	26324444
AT5G65800	ACS5|ATACS5|CIN5|ETO2	non-targets	chr5	-	Yes	26330735-26330736	26330903-26330904	Yes	26330735	26330903
AT5G65920		non-targets	chr5	-	No	26364015-26364016	26364014-26364015	Yes	26364015	26364014
AT5G65930	KCBP|PKCBP|ZWI	permissive	chr5	-	Yes	26371538-26371539	26372246-26372247	Yes	26371538	26372246
AT5G66030	ATGRIP|GRIP	permissive	chr5	-	No	26404907-26404908	26404881-26404882	Yes	26404907	26404881
AT5G66050		non-targets	chr5	-	No	26412098-26412099	26412098-26412099	No	26412098	26412098
AT5G66210	CPK28	non-targets	chr5	-	Yes	26456321-26456322	26456536-26456537	Yes	26456321	26456536
AT5G66300	ANAC105|NAC105|VND3	non-targets	chr5	-	Yes	26479786-26479787	26479693-26479694	Yes	26479786	26479693
AT5G66610	DAR7	non-targets	chr5	+	Yes	26588001-26588002	26587911-26587912	Yes	26588001	26587911
AT5G66820		non-targets	chr5	+	No	26691178-26691179	26691147-26691148	Yes	26691178	26691147
AT5G66840		non-targets	chr5	-	No	NA	26692557-26692558	NA	NA	26692557
AT5G66950		non-targets	chr5	+	No	26736155-26736156	26736155-26736156	No	26736155	26736155
AT5G67020		non-targets	chr5	+	No	26749898-26749899	26749898-26749899	No	26749898	26749898
AT5G67070	RALFL34	non-targets	chr5	+	Yes	26768681-26768682	26768840-26768841	Yes	26768681	26768840
AT5G67600	WIH1	non-targets	chr5	-	No	26960183-26960184	26960183-26960184	No	26960183	26960183
