# Supplementary material for: The YTHDF proteins ECT2 and ECT3 bind largely overlapping target sets and influence target mRNA abundance, not alternative polyadenylation
Source: eLife journal article supplement (doi:10.7554/elife.72377), 2021-09-30
Supplement: supp [file elife-72377-supp-v1.zip › elife_poa_e72377_Supplementary_file_5.xlsx]

## Sheet: Info
Supplementary File 5
Differential expression analysis of mRNA (root protoplasts and 4-day-old root tips)
Genes included in this table	All genes with detectable mRNA levels in Smart-seq2 libraries prepared from mRNA of root cells (FACS-sorted protoplasts expressing ECT2-mCherry). Protoplast-suspensions were prepared from roots of 7-day-old seedlings of the following genotypes: - ect2-1 ECT2-mCherry (seedlings of 3 independent lines used as biological replicates) - te234 ECT2W464A-mCherry (seedlings of 3 independent lines used as…
Differential Expression Analysis data (DEA, log2(FC), p-adj)	Data regarding differential expression analysis (DESeq2) between genotypes lacking ECT2/3/4-function or not in the experimental setup described above (protoplasts). Additionally, differential expression analysis data on mRNA-seq of 4-day-old root tips (manually dissected) is included for comparison.
ECT2/ECT3 Target Status in roots	ECT2/ECT3 target status in roots as defined in Figure 4—figure supplement 1B and Supplemental File 3. The target status is defined by the combination of target identification data obtained by ECT2 and ECT3 HyperTRIBE in roots (HTr) and ECT2-iCLIP (experiment performed in whole seedlings) in the following manner: Stringent target set: Defined as the intersection between ECT2-iCLIP-defined targets,…
References for External data	We have included infomation on publically available data from the following sources: Nanopore and miCLIP (seedlings): * Parker, M.T., Knop, K., Sherwood, A.V., Schurch, N.J., Mackinnon, K., Gould, P.D., Hall, A.J.W., Barton, G.J., and Simpson, G.G. (2020). Nanopore direct RNA sequencing maps the complexity of Arabidopsis mRNA processing and m6A modification. eLife 9, e49658. m6A-Seq-seedlings: **…

## Sheet: Headers
Data type	Column Headers	Description	Values
ID	Gene_ID	AGI locus code
	Prot_ID	Protein accession number
	ARAPORT11	Gene name from Araport11
	TAIR10	Gene name from TAIR10
	Description	Gene description from Araport11
Protoplasts
Quantification (loge(TPM+1))	L1_ect2-1_ECT2-mCh	Expression values (loge(TPM+1)) of the 1st replicate (Line 1) of ect2-1_ECT2-mCh
	L2_ect2-1_ECT2-mCh	Expression values (loge(TPM+1)) of the 2nd replicate (Line 2) of ect2-1_ECT2-mCh
	L3_ect2-1_ECT2-mCh	Expression values (loge(TPM+1)) of the 3rd replicate (Line 3) of ect2-1_ECT2-mCh
	L1_te234_ECT2W464A-mCh	Expression values (loge(TPM+1)) of the 1st replicate (Line 1) of te234_ECT2W464A-mCh
	L2_te234_ECT2W464A-mCh	Expression values (loge(TPM+1)) of the 2nd replicate (Line 2) of te234_ECT2W464A-mCh
	L3_te234_ECT2W464A-mCh	Expression values (loge(TPM+1)) of the 3rd replicate (Line 3) of te234_ECT2W464A-mCh
	Avg_ect2-1_ECT2-mCh	Average loge(TPM+1) of ect2-1_ECT2-mCh samples
	Avg_te234_ECT2W464A-mCh	Average loge(TPM+1) of te234_ECT2W464A-mCh samples
Differential Expression Analysis (DESeq2)	DEA (protoplasts)	Differential gene expression between genotypes lacking ECT2/3/4-function or not. The experimental setup is briefly described in the accompanying INFO-sheet. Note: FC and p-adj are described below.	UP (Upregulated): if FC>1.5, and p-adj <= 0.05 DOWN (Downregulated): if FC<[1/1.5], and p-adj <= 0.05 1/1.5<=FC<=1.5: if 1/1.5<=FC<=[1.5] and p-adj<=0.05 N.S. (Not Significant): if p-adj>0.05 N.A. (Not applicable) : if expression of the gene can be detected but the data does not pass the filters for differential expression analysis (DESeq2)
	FC (protoplasts)	Fold Change [te234_ECT2W464A-mCh / ect2-1_ECT2-mCh]	Numerical value N.A. (Not applicable) : if expression of the gene can be detected but the data does not pass the filters for differential expression analysis (DESeq2)
	log2(FC) (protoplasts)	log2 (Fold Change [te234_ECT2W464A-mCh / ect2-1_ECT2-mCh])
	p-adj (protoplasts)	BH (Benjamini-Hochberg)-adjusted p-value
Root tips (4-day-old)
Quantification (loge(TPM+1))	R1_Col-0 WT	Expression values (loge(TPM+1)) of the 1st replicate of Col-0 WT
	R2_Col-0 WT	Expression values (loge(TPM+1)) of the 2nd replicate of Col-0 WT
	R3_Col-0 WT	Expression values (loge(TPM+1)) of the 3rd replicate of Col-0 WT
	R1_te234	Expression values (loge(TPM+1)) of the 1st replicate of te234
	R2_te234	Expression values (loge(TPM+1)) of the 2nd replicate of te234
	R3_te234	Expression values (loge(TPM+1)) of the 3rd replicate of te234
	Avg_Col-0 WT	Average loge(TPM+1) of Col-0 WT samples
	Avg_te234	Average loge(TPM+1) of te234 samples
Differential Expression Analysis (DESeq2)	DEA (root tips)	Differential gene expression between triple ect2/ect3/ect4 KO (te234) and wild type in root tips	UP (Upregulated): if FC>1.5, and p-adj <= 0.05 DOWN (Downregulated): if FC<[1/1.5], and p-adj <= 0.05 1/1.5<=FC<=1.5: if 1/1.5<=FC<=[1.5] and p-adj<=0.05 N.S. (Not Significant): if p-adj>0.05 N.A. (Not applicable) : if expression of the gene can be detected but the data does not pass the filters for differential expression analysis (DESeq2)
	FC (root tips)	Fold Change [te234 / Col-0 WT]	Numerical value N.A. (Not applicable) : if expression of the gene can be detected but the data does not pass the filters for differential expression analysis (DESeq2)
	log2(FC) (root tips)	log2 (Fold Change [te234 / Col-0 WT])
	p-adj (root tips)	BH (Benjamini-Hochberg)-adjusted p-value
ECT2/ECT3 target ident. In roots (data from this article)	ECT2/3-Target Status (Roots)	ECT2/ECT3 Target Status in roots	Values are STRINGENT/PERMISSIVE/Non-Target/N.A. as described in the accompanying Info-sheet. Note: as the Stringent target sets are contained within the Permissive target sets, targets assigned "PERMISSIVE" status are those not contained in the corresponding Stringent set.
	ECT2-HT (Roots)	Support from ECT2 HyperTRIBE-target identification in roots of 10 day-old seedlings	YES if the gene is identified as a target in the corresponding HyperTRIBE dataset NO if the gene is not identified as a target in the corresponding HyperTRIBE dataset N.E.(Not expressed) if expression of the gene is not detected in the corresponding HyperTRIBE dataset
	ECT3-HT (Roots)	Support from ECT3 HyperTRIBE-target identification in roots of 10 day-old seedlings
	ECT2-iCLIP (Whole seedlings)	Support from ECT2mCherry iCLIP-target identification (wild type, 110 kDa-band) in 12-day-old seedlings	GENE BODY LOCATION of the peak(s) (5'UTR/CDS/3'UTR/INTRON), if the gene is identified as a target by ECT2 iCLIP. NO if the gene is not identified as a target by ECT2-iCLIP
External Data	ECT2-FA-CLIP ***	Support from ECT2 FA-CLIP-target identification (in seedlings) and gene body location according to Wei et al., 2018 (The Plant Cell)	GENE BODY LOCATION of the peak(s), according to Wei et al., if the gene is identified as a target by ECT2-FA-CLIP NO if the gene is not identified as a target by ECT2-FA-CLIP
	Nanopore *	Presence of m6A in the transcript (in seedlings) according to Nanopore (Parker et al., 2020. eLIFE)	GENE BODY LOCATION (5'UTR/CDS/3'UTR/INTRON) of the hit(s) if m6A is detected in the transcript by Nanopore RNA-sequencing. The locations have been annotated by us from the coordinates provided by Parker et al. N.A. if the hit(s) do not fall into any of the four categories 3'UTR, CDS, 5'UTR, intron (typically sORFs or lncRNAs) NO if m6A is not detected in the transcript by Nanopore RNA-sequencing
	miCLIP *	Presence of m6A in the transcript (in seedlings) according to miCLIP (Parker et al., 2020. eLIFE)	GENE BODY LOCATION (5'UTR/CDS/3'UTR/INTRON) of the hit(s) if m6A is detected in the transcript by miCLIP RNA-sequencing. The locations have been annotated by us from the coordinates provided by Parker et al. N.A. if the hit(s) do not fall into any of the four catogires: 3'UTR, CDS, 5'UTR, intron (typically sORFs or lncRNAs) NO if m6A is not detected in the transcript by miCLIP RNA-sequencing
	m6A-Seq-seedlings **	Presence of m6A in the transcript (in seedlings) according to m6A-Seq (Shen et al., 2016. Dev. Cell)	GENE BODY LOCATION of the peak(s), according to Shen et al., if the transcript is identified as containing m6A NO if the transcript is not identified as containing m6A
Additional Information	transcript_length_list	Transcript lengths (for all isoforms) according to Araport11
	transcript_length_max	Length of the longest transcript among all isoforms
	gc_content_list	GC content (fraction) for all the isoforms annotated in Araport11
	gc_max	Maximum value of `gc_content_list`
	gc_mean	Average value of `gc_content_list`

## Sheet: mRNA DEA
Gene_ID	Prot_ID	ARAPORT11	TAIR10	Description	L1 ect2-1 ECT2-mCh (protoplasts)	L2 ect2-1 ECT2-mCh (protoplasts)	L3 ect2-1 ECT2-mCh (protoplasts)	L1 te234 ECT2W464A-mCh (protoplasts)	L2 te234 ECT2W464A-mCh (protoplasts)	L3 te234 ECT2W464A-mCh (protoplasts)	Avg ect2-1 ECT2-mCh (protoplasts)	Avg te234 ECT2W464A-mCh (protoplasts)	DEA (protoplasts)	FC (protoplasts)	log2(FC) (protoplasts)	p-adj (protoplasts)	R1 Col-0 WT (root tips)	R2 Col-0 WT (root tips)	R3 Col-0 WT (root tips)	R1 te234 (root tips)	R2 te234 (root tips)	R3 te234 (root tips)	Avg Col-0 WT (root tips)	Avg te234 (root tips)	DEA (root tips)	FC (root tips)	log2(FC) (root tips)	p-adj (root tips)	ECT2/3 Target Status (Roots)	ECT2-iCLIP (Whole seedlings)	ECT2-HT (Roots)	ECT3-HT (Roots)	ECT2 FA-CLIP ***	Nanopore *	miCLIP *	m6A-Seq ** (Seedlings)	transcript length list	transcript length max	gc_content list	gc_max	gc_mean
AT1G01010	Q0WV96	NAC001	ANAC001, NAC001, NTL10	NAC domain containing protein 1	3.59198	3.72807	3.90215	4.10458	3.95298	4.07109	3.74073	4.04288	1/1.5<=FC<=1.5	1.372	0.456	0.04073	2.23923	2.257	2.51911	2.4132	2.57347	2.66247	2.33845	2.54971	1/1.5<=FC<=1.5	1.211	0.276	0.00281	Non-Target	NO	NO	NO	NO	NO	NO	NO	1688	1688	0.411	0.411	0.411
AT1G01020	A0A178WKY9, A0A1P8ARY9, A0A1P8AS22, F4HQG4, Q5MK24, Q5MK24-2	ARV1	ARV1	ARV1 family protein	2.56953	2.57573	2.59771	2.64686	2.81099	2.7979	2.58099	2.75192	N.S.	1.234	0.303	0.21066	1.85274	1.45029	1.55881	1.78041	1.63196	1.78896	1.62062	1.73378	1/1.5<=FC<=1.5	1.175	0.233	0.02986	PERMISSIVE	NO	YES	NO	NO	NO	CDS, 3UTR	NO	944, 1087, 1306, 1329, 1397, 1420	1420	0.374, 0.371, 0.361, 0.359	0.374	0.364
AT1G01030	A0A1P8AT85, Q9MAN1	NGA3	NGA3	AP2/B3-like transcriptional factor family protein	0.259458	0.352092	0.600874	0.609884	0.533804	0.540843	0.404141	0.56151	N.A.	N.A.	N.A.	N.A.	0.240303	0.190898	0.335717	0.368429	0.162695	0.10983	0.255639	0.213651	N.A.	N.A.	N.A.	N.A.	Non-Target	NO	NO	NO	NO	NO	NO	NO	1836, 1905	1905	0.408, 0.406	0.408	0.407
AT1G01040	A0A178WCL8, F4HQG6, Q9SP32	DCL1	ASU1, ATDCL1, CAF, DCL1, EMB60, EMB76, SIN1, SUS1	dicer-like 1	1.01677	0.569783	0.850651	1.08682	0.803013	0.797089	0.812403	0.89564	N.S.	1.142	0.192	0.55287	0.81371	0.716189	0.991784	0.894277	1.35545	1.48684	0.840561	1.24552	UP	1.54	0.623	8.4e-10	Non-Target	NO	NO	NO	NO	NO	NO	NO	5877, 6276	6276	0.431, 0.435	0.435	0.433
AT1G01050	Q93V56	PPa1	AtPPa1, PPa1	pyrophosphorylase 1	5.52682	5.18897	5.15644	4.58134	4.66073	4.66165	5.29074	4.63457	DOWN	0.564	-0.826	3.6e-06	4.84369	4.74131	4.72742	4.78259	4.83247	4.78219	4.77081	4.79908	1/1.5<=FC<=1.5	0.875	-0.192	0.0038	STRINGENT	3UTR	YES	YES	NO	3UTR	3UTR	Stop codon	810, 994	994	0.41, 0.42	0.42	0.415
AT1G01060	F4HQG9, F4HQH3, Q6R0H1	LHY	LHY, LHY1	Homeodomain-like superfamily protein	1.63613	1.10779	1.18383	1.73581	0.944855	1.01558	1.30925	1.23208	N.S.	1.013	0.019	0.96333	2.84251	2.46868	2.2246	2.97413	2.56543	2.09245	2.51193	2.54401	N.S.	0.92	-0.12	0.4994	STRINGENT	3UTR,3UTR,3UTR,3UTR	YES	NO	5UTR	NO	NO	NO	2132, 2517, 2641, 2708, 2722, 2814, 2908, 2933	2933	0.413, 0.42, 0.41, 0.405, 0.404, 0.425, 0.414	0.425	0.413
AT1G01070	Q5XEZ0, Q5XEZ0-2	UMAMIT28	UMAMIT28	nodulin MtN21 /EamA-like transporter family protein	2.42961	2.68606	2.76505	2.4153	2.98353	2.66179	2.62691	2.68688	N.S.	1.106	0.145	0.64265	3.12378	2.95777	3.25446	3.4521	3.22302	3.19282	3.112	3.28932	N.S.	1.046	0.064	0.44635	Non-Target	NO	NO	NO	NO	NO	NO	NO	1451, 1692	1692	0.387, 0.382	0.387	0.384
AT1G01080	A0A1P8APK3, F4HQH8, Q8W592	AT1G01080		RNA-binding (RRM/RBD/RNP motifs) family protein	1.06389	0.883833	0.64665	0.568773	0.742164	0.590224	0.864792	0.63372	N.S.	0.836	-0.259	0.44956	1.48296	1.44616	1.77028	1.56726	1.88938	1.96802	1.56647	1.80822	N.S.	0.947	-0.078	0.46559	Non-Target	NO	NO	NO	NO	3UTR	3UTR	NO	1322, 1685, 1771	1771	0.4, 0.402, 0.397	0.402	0.4
AT1G01090	O24457	PDH-E1 ALPHA	PDH-E1 ALPHA	pyruvate dehydrogenase E1 alpha	4.1745	3.86415	3.77491	3.92178	3.84064	3.73874	3.93785	3.83372	N.S.	0.96	-0.059	0.80875	5.03738	5.11512	5.15978	5.27092	5.35331	5.52769	5.10409	5.38397	N.S.	1.077	0.107	0.41071	STRINGENT	3UTR	YES	NO	5UTR	3UTR	3UTR	CDS	1896	1896	0.45	0.45	0.45
AT1G01100	A8MQK8, Q8LCW9	AT1G01100	RPP1.1, RPP1A	60S acidic ribosomal protein family	6.3658	5.9506	5.8648	5.09234	5.2005	5.11775	6.0604	5.13686	DOWN	0.431	-1.216	1.2e-09	7.18786	7.2657	7.05797	6.72486	6.63004	6.47711	7.17051	6.61067	DOWN	0.557	-0.845	1.6e-14	STRINGENT	3UTR,3UTR,3UTR,3UTR	YES	YES	NO	3UTR	3UTR, 5UTR, CDS	Stop codon	566, 587, 607, 808	808	0.431, 0.45, 0.453, 0.436	0.453	0.442
AT1G01110	B3H705, Q9MAM4	18	18	IQ-domain 18	1.56207	1.45098	1.67464	1.75176	1.8095	1.6635	1.56256	1.74158	N.S.	1.248	0.32	0.24266	2.04683	2.11843	2.08512	2.33592	2.28595	2.47573	2.08346	2.36587	N.S.	1.119	0.162	0.15499	Non-Target	NO	NO	NO	NO	NO	NO	NO	2044, 2113	2113	0.438, 0.442	0.442	0.44
AT1G01120	Q9MAM3	KCS1	KCS1	3-ketoacyl-CoA synthase 1	3.36638	3.22363	3.46742	3.60299	4.00307	3.94355	3.35248	3.84987	UP	1.708	0.772	0.00089	3.97467	3.87605	3.90461	4.21423	4.1301	4.18335	3.91844	4.17589	N.S.	1.025	0.036	0.66639	Non-Target	NO	NO	NO	NO	NO	NO	NO	2052	2052	0.427	0.427	0.427
AT1G01130	A0A178WH54, F4HQI8	AT1G01130		CBL-interacting Serine/Threonine-kinase	1.23649	0.940922	1.23656	2.18713	1.68937	1.92006	1.13799	1.93218	N.S.	1.974	0.981	0.05166	2.89803	2.72951	2.77952	2.99567	2.93598	2.37711	2.80235	2.76958	1/1.5<=FC<=1.5	0.773	-0.371	0.00338	Non-Target	NO	NO	NO	NO	NO	NO	NO	375	375	0.483	0.483	0.483
AT1G01140	Q9MAM1, Q9MAM1-1, Q9MAM1-2, Q9MAM1-4	CIPK9	CIPK9, PKS6, SnRK3.12	CBL-interacting protein kinase 9	3.81936	3.90519	4.05679	4.25045	4.76474	4.60815	3.92711	4.54111	UP	1.903	0.928	0.00024	1.86894	1.63255	1.80848	2.02759	1.97421	1.80851	1.76999	1.93677	1/1.5<=FC<=1.5	1.234	0.303	0.02829	Non-Target	NO	NO	NO	3UTR	NO	3UTR	Stop codon	1694, 1700, 1838	1838	0.434, 0.43, 0.429	0.434	0.431
AT1G01150	A0A1P8AUM7, A0A1P8AUQ9, F4HQJ2	AT1G01150		Homeodomain-like protein with RING/FYVE/PHD-type zinc finger domain-containing protein	0	0	0	0	0.154649	0	0	0.0515496	N.A.	N.A.	N.A.	N.A.	0.130238	0.0568566	0.15244	0	0.0561431	0	0.113178	0.0187144	N.A.	N.A.	N.A.	N.A.	N.A.	NO	NO	NO	NO	NO	NO	NO	1150, 1228, 1382	1382	0.406, 0.413	0.413	0.408
AT1G01160	A0A178W5S2, F4HQJ3, Q9MAL9	GIF2	GIF2	GRF1-interacting factor 2	3.32099	2.82837	3.02236	2.85627	2.93654	2.9039	3.05724	2.8989	N.S.	0.908	-0.14	0.6	3.12685	3.18723	3.30182	3.04626	3.02046	3.14586	3.2053	3.07086	1/1.5<=FC<=1.5	0.777	-0.364	1.6e-11	Non-Target	NO	NO	NO	NO	3UTR	3UTR	3' UTR	1045, 1129	1129	0.449, 0.446	0.449	0.448
AT1G01170	Q2HIQ2	AT1G01170		ozone-responsive stress-like protein (DUF1138)	1.9136	1.86362	1.86806	1.21558	1.02714	1.40717	1.88176	1.21663	N.S.	0.615	-0.702	0.08993	3.34945	3.32525	3.45117	3.46168	3.5074	3.38294	3.37529	3.45067	1/1.5<=FC<=1.5	0.82	-0.286	0.04546	N.A.	3UTR,3UTR	NO	NO	3UTR, CDS	NO	3UTR	Stop codon	503, 515	515	0.414, 0.416	0.416	0.415
AT1G01180	F4HS78, Q0WRD8, Q9MAL7	AT1G01180		S-adenosyl-L-methionine-dependent methyltransferases superfamily protein	0.820789	1.21035	1.27607	1.56436	1.88743	1.93707	1.1024	1.79629	UP	2.287	1.193	0.00286	3.13189	3.20162	3.32767	3.54708	3.33183	3.43505	3.22039	3.43799	N.S.	0.964	-0.054	0.5402	Non-Target	NO	NO	NO	NO	NO	NO	NO	1456	1456	0.424	0.424	0.424
AT1G01190	A0A384KEP9, F4HS79	CYP78A8	CYP78A8	cytochrome P450, family 78, subfamily A, polypeptide 8	0.033634	0.0779522	0	0	0	0	0.0371954	0	N.A.	N.A.	N.A.	N.A.	0.630268	0.717895	1.0563	0.921491	1.04066	1.15567	0.801488	1.03927	N.S.	0.987	-0.019	0.90263	Non-Target	NO	NO	NO	NO	NO	NO	NO	1669, 1690	1690	0.472, 0.469	0.472	0.47
AT1G01200	A0A178W3L5, A0A178W475, Q9LNK1	RABA3	ATRAB-A3, ATRABA3, RABA3	RAB GTPase homolog A3	1.76781	1.50066	1.55231	2.03949	1.64635	1.58161	1.60693	1.75582	N.S.	1.2	0.263	0.41325	2.44049	2.3436	2.16218	2.28923	2.01947	2.14723	2.31543	2.15198	1/1.5<=FC<=1.5	0.818	-0.29	0.00242	Non-Target	NO	NO	NO	NO	NO	NO	NO	1207	1207	0.429	0.429	0.429
AT1G01210	Q9LNK0	AT1G01210		DNA-directed RNA polymerase, subunit M, archaeal	2.40942	2.37499	2.34683	2.22778	2.54119	2.43364	2.37708	2.40087	N.S.	1.075	0.104	0.75413	3.82369	3.76963	3.71747	3.32101	3.26302	3.2064	3.77026	3.26347	DOWN	0.663	-0.592	3.2e-09	PERMISSIVE	NO	YES	NO	NO	NO	NO	NO	624, 669, 806	806	0.408, 0.428, 0.412	0.428	0.416
AT1G01220	A0A178W6Y3, A0A1P8APH1, A0A1P8API3, Q9LNJ9	FKGP	AtFKGP, FKGP	L-fucokinase/GDP-L-fucose pyrophosphorylase	2.02091	1.67342	1.76082	1.63162	1.70279	1.70321	1.81838	1.6792	N.S.	0.909	-0.138	0.59456	1.63015	1.56836	1.80251	1.81362	1.959	1.96949	1.66701	1.91404	1/1.5<=FC<=1.5	1.17	0.226	2.8e-05	Non-Target	NO	NO	NO	NO	NO	NO	NO	3398, 3554, 3596, 3615, 3622, 3643, 3795, 3862	3862	0.432, 0.427, 0.424, 0.429, 0.437, 0.431	0.437	0.43
AT1G01225	Q29PY0	AT1G01225		NC domain-containing protein-like protein	1.56897	1.29341	1.15227	0.627644	0.797814	0.858298	1.33822	0.761252	DOWN	0.544	-0.879	0.0424	1.85516	1.76647	1.80911	1.52808	1.85838	1.70489	1.81025	1.69712	1/1.5<=FC<=1.5	0.719	-0.476	2.5e-07	Non-Target	NO	NO	NO	NO	NO	NO	NO	1077	1077	0.427	0.427	0.427
AT1G01230	Q9C5I0, Q9LNJ8	AT1G01230	AtORM1	ORMDL family protein	5.03868	4.95397	4.75356	3.6175	3.68989	3.99827	4.9154	3.76855	DOWN	0.348	-1.521	4e-12	4.15939	4.15449	4.21276	3.87444	3.65872	3.57618	4.17555	3.70311	DOWN	0.618	-0.695	< 2e-16	Non-Target	NO	NO	NO	NO	NO	3UTR	NO	876	876	0.401	0.401	0.401
AT1G01240	Q9LNJ7	AT1G01240		transmembrane protein	3.19923	3.64383	3.8443	2.90684	3.29506	3.21608	3.56245	3.13933	N.S.	0.727	-0.459	0.12071	1.68824	1.60747	1.81081	1.76979	1.66382	1.66716	1.70217	1.70026	N.S.	0.813	-0.298	0.07349	Non-Target	NO	NO	NO	3UTR	NO	NO	NO	1461, 1497, 1686, 1932, 2122	2122	0.399, 0.391, 0.4, 0.376, 0.38	0.4	0.389
AT1G01260	Q9LNJ5	AT1G01260	bHLH013, bHLH13, JAM2	basic helix-loop-helix (bHLH) DNA-binding superfamily protein	1.50456	1.21333	1.37381	1.58311	1.48576	1.59636	1.3639	1.55508	N.S.	1.277	0.353	0.18584	2.19465	2.17866	2.20499	2.27998	2.18179	2.26993	2.19277	2.2439	N.S.	0.96	-0.059	0.19438	Non-Target	NO	NO	NO	NO	NO	NO	NO	2378, 2679, 2709	2709	0.412, 0.409, 0.422	0.422	0.414
AT1G01290	Q39056	3	3	cofactor of nitrate reductase and xanthine dehydrogenase 3	1.6751	1.78588	1.38876	1.74289	1.59819	1.46266	1.61658	1.60125	N.S.	1.034	0.048	0.8928	2.34755	2.11178	2.29787	2.42083	2.38436	2.25594	2.2524	2.35371	N.S.	1.011	0.016	0.8486	Non-Target	NO	NO	NO	NO	CDS	NO	NO	1400, 2021	2021	0.38, 0.396	0.396	0.388
AT1G01300	Q9LNJ3	AT1G01300		Eukaryotic aspartyl protease family protein	3.58212	3.28356	2.9521	3.65535	3.26387	3.27604	3.27259	3.39842	N.S.	1.16	0.214	0.43682	3.60068	3.7517	3.78301	4.01076	4.28623	4.47969	3.7118	4.2589	1/1.5<=FC<=1.5	1.34	0.423	0.00246	Non-Target	NO	NO	NO	NO	NO	NO	CDS	2062	2062	0.458	0.458	0.458
AT1G01305	Q1G401	AT1G01305		hypothetical protein	0	0	0	0.145746	0	0	0	0.0485819	N.A.	N.A.	N.A.	N.A.	0	0	0	0	0.0886727	0	0	0.0295576	N.A.	N.A.	N.A.	N.A.	N.A.	NO	NO	NO	NO	NO	NO	NO	617	617	0.371	0.371	0.371
AT1G01310	Q6ID87, Q9LNJ2	AT1G01310		CAP (Cysteine-rich secretory proteins, Antigen 5, and Pathogenesis-related 1 protein) superfamily protein	0.318966	0	0	0.163708	0.117159	0.22537	0.106322	0.168745	N.A.	N.A.	N.A.	N.A.	0.231705	0.282197	0.231288	0.344975	0.310091	0.228559	0.248397	0.294542	N.A.	N.A.	N.A.	N.A.	N.A.	NO	NO	NO	NO	NO	NO	NO	977	977	0.452	0.452	0.452
AT1G01320	A0A1P8AR50, F4HS98, F4HS99	AT1G01320	REC1	Tetratricopeptide repeat (TPR)-like superfamily protein	0.243308	0.257562	0.434823	0.172989	0.340383	0.164949	0.311897	0.226107	N.A.	N.A.	N.A.	N.A.	0.801573	0.779551	1.29244	1.2029	1.6064	1.38323	0.957855	1.39751	1/1.5<=FC<=1.5	1.447	0.533	0.0001	Non-Target	NO	NO	NO	3UTR	3UTR	3UTR	3' UTR	6015, 6049, 6051	6051	0.435, 0.436	0.436	0.435
AT1G01340	Q9LNJ0, Q9LNJ0-2	CNGC10	ACBK1, ATCNGC10, CNGC10	cyclic nucleotide gated channel 10	1.13938	0.780774	1.11232	2.16155	2.30606	2.0234	1.01083	2.16367	UP	4.385	2.133	1.1e-13	1.17456	1.20017	1.49442	1.61404	1.64187	1.82254	1.28972	1.69282	1/1.5<=FC<=1.5	1.385	0.47	0.00177	Non-Target	NO	NO	NO	NO	NO	NO	NO	2411, 2550	2550	0.428, 0.421	0.428	0.424
AT1G01350	Q8GX84	AT1G01350		Zinc finger (CCCH-type/C3HC4-type RING finger) family protein	3.28296	3.30988	3.57494	3.72322	3.83485	3.82205	3.38926	3.79338	UP	1.521	0.605	0.00703	2.4956	2.65455	2.58859	2.66865	2.63223	2.65818	2.57958	2.65302	N.S.	1.038	0.054	0.55946	Non-Target	NO	NO	NO	NO	3UTR	NO	NO	1434	1434	0.409	0.409	0.409
AT1G01355	A0A1P8AVR8, A0A1P8AVW5, F4HSA3	AT1G01355		Putative endonuclease or glycosyl hydrolase	0	0	0	0	0	0.152509	0	0.0508363	N.A.	N.A.	N.A.	N.A.	0	0	0	0	0.0638036	0	0	0.0212679	N.A.	N.A.	N.A.	N.A.	N.A.	NO	NO	NO	NO	NO	NO	NO	758, 783, 799	799	0.485, 0.483, 0.473	0.485	0.48
AT1G01360	Q84MC7	RCAR1	PYL9, RCAR1	regulatory component of ABA receptor 1	4.19899	4.42537	4.57852	4.73714	4.66375	4.60598	4.40096	4.66895	N.S.	1.312	0.392	0.09504	2.92486	2.78201	2.91779	2.93517	2.72383	2.59449	2.87488	2.75117	1/1.5<=FC<=1.5	0.828	-0.272	0.00419	Non-Target	NO	NO	NO	NO	NO	NO	NO	1179	1179	0.378	0.378	0.378
AT1G01370	A0A178W8H5, A0A178W975, Q8RVQ9	HTR12	CENH3, HTR12	Histone superfamily protein	1.67012	0.964215	1.02122	0.632181	1.02299	0.869339	1.21852	0.841504	N.S.	0.754	-0.407	0.25741	2.20177	2.4144	2.55933	2.31477	2.10689	2.22256	2.39183	2.21474	1/1.5<=FC<=1.5	0.779	-0.36	8.2e-05	PERMISSIVE	NO	YES	YES	3UTR	NO	NO	NO	980, 1085, 1376, 1463	1463	0.398, 0.401, 0.424, 0.429	0.429	0.413
AT1G01380	A0A1P8AQ06, A0A1P8AQ13, Q9LNI5	ETC1	ETC1	Homeodomain-like superfamily protein	1.75274	1.29196	1.83424	1.96263	2.08014	1.49839	1.62632	1.84705	N.S.	1.202	0.265	0.44029	2.19173	2.06327	2.05978	1.90726	1.85788	2.04093	2.10493	1.93536	N.S.	0.843	-0.246	0.05799	Non-Target	NO	NO	NO	NO	NO	NO	NO	557, 750, 854	854	0.357, 0.375, 0.363	0.375	0.365
AT1G01390	A0A1P8AV09, Q8W4C2	AT1G01390		UDP-Glycosyltransferase superfamily protein	0.0312215	0	0	0.0861364	0	0	0.0104072	0.0287121	N.A.	N.A.	N.A.	N.A.	0.038071	0.0706588	0.139748	0.130612	0.252277	0	0.082826	0.12763	N.A.	N.A.	N.A.	N.A.	N.A.	NO	NO	NO	NO	NO	NO	NO	1789, 1836	1836	0.431, 0.434	0.434	0.432
AT1G01410	Q9LNI2	PUM22	APUM22, PUM22	pumilio 22	0	0	0.229003	0	0	0	0.0763344	0	N.A.	N.A.	N.A.	N.A.	N.E.	N.E.	N.E.	N.E.	N.E.	N.E.	N.E.	N.E.	N.E.	N.E.	N.E.	N.E.	N.A.	NO	NO	NO	NO	NO	NO	NO	1086	1086	0.417	0.417	0.417
AT1G01420	A0A1P8AUD8, Q9LNI1	UGT72B3	UGT72B3	UDP-glucosyl transferase 72B3	0.0372091	0	0	0.0523875	0	0	0.012403	0.0174625	N.A.	N.A.	N.A.	N.A.	1.69992	1.71795	1.97101	1.99507	2.16593	1.58729	1.79629	1.9161	N.S.	1.025	0.035	0.76709	Non-Target	NO	NO	NO	NO	NO	NO	NO	1520, 1812	1812	0.427, 0.466	0.466	0.446
AT1G01430	Q84JH9	TBL25	MOAT3, TBL25	TRICHOME BIREFRINGENCE-LIKE 25	3.1063	3.0245	2.7813	2.59915	1.99419	2.46302	2.9707	2.35212	DOWN	0.607	-0.721	0.00754	2.48498	2.52867	2.64067	2.79123	2.97195	3.1055	2.55144	2.95623	N.S.	1.097	0.134	0.21768	Non-Target	NO	NO	NO	NO	NO	NO	NO	2134	2134	0.42	0.42	0.42
AT1G01440	Q6NQ63	AT1G01440		hypothetical protein (DUF3133)	2.37488	2.24921	2.3684	2.22565	2.01661	1.96219	2.33083	2.06815	N.S.	0.826	-0.276	0.2289	1.77087	1.88879	2.04089	2.0583	2.02392	2.21182	1.90018	2.09802	N.S.	1.023	0.033	0.68876	PERMISSIVE	NO	YES	NO	NO	NO	NO	NO	2830	2830	0.418	0.418	0.418
AT1G01450	F4HSB4, O23706	AT1G01450		Protein kinase superfamily protein	1.54747	1.50523	1.7188	1.75489	1.70237	1.6859	1.5905	1.71439	N.S.	1.164	0.22	0.47295	0	0	0	0	0.0352542	0	0	0.0117514	N.A.	N.A.	N.A.	N.A.	Non-Target	NO	NO	NO	NO	NO	NO	NO	1413	1413	0.423	0.423	0.423
AT1G01453	B3H6G3, F4HSB6, Q9LMN2	AT1G01453		late embryogenesis abundant hydroxyproline-rich glycoprotein family protein	0.620235	0.614187	0.426442	0.949852	0.413213	0.8333	0.553621	0.732122	N.S.	1.208	0.273	0.41493	0.610403	0.474422	0.811145	0.711723	0.62891	0.774298	0.63199	0.704977	N.S.	0.865	-0.21	0.24784	Non-Target	NO	NO	NO	NO	NO	NO	NO	1225, 1358	1358	0.447	0.447	0.447
AT1G01460	Q9LMN1	PIPK11	ATPIPK11, PIPK11	Phosphatidylinositol-4-phosphate 5-kinase, core	0	0.0705032	0.090948	0	0.168422	0	0.053817	0.0561407	N.A.	N.A.	N.A.	N.A.	0.0192044	0	0	0	0	0	0.00640147	0	N.A.	N.A.	N.A.	N.A.	N.A.	NO	NO	NO	NO	NO	NO	NO	1837	1837	0.393	0.393	0.393
AT1G01470	O03983	LEA14	AtLEA14, LEA1, LEA14, LSR3	Late embryogenesis abundant protein	5.88716	6.11083	6.32619	6.03805	6.30526	5.98669	6.10806	6.11	N.S.	1.038	0.054	0.85335	4.94865	5.00408	5.04631	5.0804	5.02457	5.01515	4.99968	5.04004	N.S.	1.058	0.081	0.46137	Non-Target	NO	NO	NO	NO	NO	NO	NO	1348	1348	0.389	0.389	0.389
AT1G01480	Q06402, Q06402-2	ACS2	ACS2, AT-ACC2	1-amino-cyclopropane-1-carboxylate synthase 2	1.03849	0.902066	1.33993	1.36264	1.08181	1.28278	1.0935	1.24241	N.S.	1.174	0.231	0.48772	1.55463	1.38215	1.46165	1.86015	1.69853	2.02989	1.46614	1.86286	1/1.5<=FC<=1.5	1.2	0.264	0.00282	Non-Target	NO	NO	NO	NO	NO	5UTR	NO	1735, 2002	2002	0.421	0.421	0.421
AT1G01490	A0A1P8AS50, A0A1P8AS52, O03982	AT1G01490		Heavy metal transport/detoxification superfamily protein	3.3475	3.06323	3.21036	2.96606	3.50396	3.34265	3.20703	3.27089	N.S.	1.129	0.175	0.52642	3.59062	3.66958	3.67179	3.90223	3.78837	3.74709	3.644	3.81256	N.S.	1.07	0.098	0.3169	Non-Target	NO	NO	NO	CDS	3UTR	3UTR	CDS	1445, 1562, 1698, 1907	1907	0.367, 0.373, 0.384, 0.378	0.384	0.376
AT1G01500	Q8GUH2	AT1G01500		Erythronate-4-phosphate dehydrogenase family protein	1.55067	1.68691	1.73189	1.96454	1.79514	1.98367	1.65649	1.91445	N.S.	1.355	0.438	0.11621	2.23562	2.22561	2.39982	2.60463	2.64709	2.74173	2.28702	2.66448	1/1.5<=FC<=1.5	1.163	0.218	0.01184	Non-Target	NO	NO	NO	NO	NO	NO	NO	1773	1773	0.433	0.433	0.433
AT1G01510	O23702	AN	AN, DOQ	NAD(P)-binding Rossmann-fold superfamily protein	3.00719	2.88096	2.7533	2.82733	2.74026	2.65754	2.88048	2.74171	N.S.	0.93	-0.104	0.6428	3.19959	3.20813	3.42882	3.41078	3.42578	3.52632	3.27884	3.45429	N.S.	0.957	-0.063	0.18736	PERMISSIVE	NO	YES	YES	3UTR	3UTR	NO	Stop codon	2637	2637	0.453	0.453	0.453
AT1G01520	A0A178W835, A0A1P8AM82, A0A1P8AMB7, Q6R0H0	ASG4	ASG4, REV3	Homeodomain-like superfamily protein	0.184795	0.18651	0.183089	0.0596171	0	0.326792	0.184798	0.128803	N.A.	N.A.	N.A.	N.A.	0.071323	0.0262689	0.0925792	0.212064	0.134579	0.155636	0.0633904	0.167426	N.A.	N.A.	N.A.	N.A.	Non-Target	NO	NO	NO	NO	NO	NO	NO	1349, 1361, 1426, 1429, 1506	1506	0.396, 0.391, 0.394, 0.399	0.399	0.394
AT1G01530	Q9LMM8	AGL28	AGL28	AGAMOUS-like 28	0	0.182693	0.123993	0	0	0	0.102229	0	N.A.	N.A.	N.A.	N.A.	N.E.	N.E.	N.E.	N.E.	N.E.	N.E.	N.E.	N.E.	N.E.	N.E.	N.E.	N.E.	N.A.	NO	NO	NO	NO	NO	NO	NO	758	758	0.404	0.404	0.404
AT1G01540	F4HSC9, Q3EDL4, Q570G5	AT1G01540		Protein kinase superfamily protein	3.72281	3.31503	3.08832	3.21605	2.9864	2.91905	3.37538	3.0405	N.S.	0.78	-0.359	0.15491	3.16062	3.16074	3.32829	3.29857	3.26755	3.10037	3.21655	3.22216	1/1.5<=FC<=1.5	0.899	-0.153	0.00624	STRINGENT	3UTR,3UTR	YES	NO	NO	NO	3UTR	NO	1908, 2158	2158	0.434, 0.444	0.444	0.439
AT1G01550	Q9LMM6	BPS1	BPS1	BPS1-like protein (DUF793)	4.68266	4.60859	4.76219	4.88068	4.80536	4.91731	4.68448	4.86778	N.S.	1.253	0.326	0.07408	4.15568	4.19079	4.31202	4.47632	4.5094	4.57841	4.2195	4.52137	1/1.5<=FC<=1.5	1.092	0.126	0.03879	N.A.	3UTR,3UTR	NO	NO	3UTR	3UTR	3UTR	NO	1572, 1595	1595	0.408, 0.403	0.408	0.405
AT1G01560	A0A1P8ASZ4, Q9LMM5, Q9LMM5-2	MPK11	ATMPK11, MPK11	MAP kinase 11	0.596646	0.569132	0.441963	0.477474	0.251057	0	0.535914	0.242844	N.A.	N.A.	N.A.	N.A.	0.044915	0.24799	0.0759114	0.111831	0	0	0.122939	0.037277	N.A.	N.A.	N.A.	N.A.	N.A.	NO	NO	NO	NO	NO	NO	NO	1595, 1625, 1636, 1710	1710	0.395, 0.401, 0.393, 0.398	0.401	0.397
AT1G01570	F4HU33, Q9LMM4	AT1G01570		transferring glycosyl group transferase (DUF604)	1.23143	0.854306	0.980733	0.723848	0.538545	0.765011	1.02215	0.675801	N.S.	0.703	-0.508	0.16087	1.67963	1.76249	1.7149	1.63441	1.74919	1.76481	1.71901	1.71614	1/1.5<=FC<=1.5	0.781	-0.357	0.0009	Non-Target	NO	NO	NO	NO	NO	NO	NO	1437, 1885	1885	0.447, 0.477	0.477	0.462
AT1G01580	A0A1P8AVL6, P92949	FRO2	ATFRO2, FRD1, FRO2	ferric reduction oxidase 2	1.30004	0.128609	0.395294	0.2131	0.28701	0.191722	0.607982	0.230611	N.S.	0.55	-0.863	0.06714	3.73285	4.1035	4.04922	4.08675	4.29444	4.52256	3.96186	4.30125	N.S.	1.129	0.175	0.32218	Non-Target	NO	NO	NO	NO	NO	NO	NO	2635, 2850	2850	0.415, 0.428	0.428	0.422
AT1G01600	Q9LMM1	CYP86A4	CYP86A4	cytochrome P450, family 86, subfamily A, polypeptide 4	0.113063	0	0.0362943	0.127315	0.173972	0.0922482	0.0497859	0.131178	N.A.	N.A.	N.A.	N.A.	2.50458	2.40425	2.21926	2.3143	2.48138	2.4686	2.37603	2.42142	N.S.	1.077	0.107	0.50623	Non-Target	NO	NO	NO	NO	NO	NO	NO	2323	2323	0.445	0.445	0.445
AT1G01610	Q9LMM0	GPAT4	ATGPAT4, GPAT4	glycerol-3-phosphate acyltransferase 4	0.462964	0.716372	0.464488	0.982075	0.564999	0.668171	0.547941	0.738415	N.S.	1.273	0.348	0.318	4.20111	4.27883	4.20045	4.44739	4.48383	4.75817	4.2268	4.56313	N.S.	0.977	-0.033	0.85016	N.A.	3UTR	NO	NO	3UTR	3UTR	3UTR	CDS	1916	1916	0.469	0.469	0.469
AT1G01620	A8MSF6, Q08733	PIP1C	PIP1;3, PIP1C, TMP-B	plasma membrane intrinsic protein 1C	7.85386	8.05121	8.10981	7.72755	7.49634	7.52656	8.00496	7.58349	1/1.5<=FC<=1.5	0.717	-0.481	0.02509	6.77439	6.66007	6.86081	6.69897	6.68968	6.74748	6.76509	6.71204	DOWN	0.623	-0.684	5.8e-10	N.A.	3UTR,3UTR	NO	NO	NO	3UTR	3UTR, 5UTR, CDS	NO	1279, 1549	1549	0.453, 0.429	0.453	0.441
AT1G01630	Q9LQ96	AT1G01630		Sec14p-like phosphatidylinositol transfer family protein	4.64953	4.43673	4.41369	3.87491	3.91066	4.06215	4.49998	3.94924	DOWN	0.629	-0.669	0.00014	4.25752	4.08772	4.34513	4.37453	4.25214	4.18124	4.23012	4.26931	N.S.	1.015	0.021	0.79351	STRINGENT	CDS,3UTR	YES	YES	NO	3UTR	NO	NO	1479	1479	0.419	0.419	0.419
AT1G01640	A0A2H1ZE92, Q9LQ95	AT1G01640		BTB/POZ domain-containing protein	1.48183	1.22028	1.31234	1.77525	1.74823	1.38681	1.33815	1.63676	N.S.	1.381	0.466	0.16431	2.43853	2.31229	2.44922	2.64537	2.53991	2.40075	2.40001	2.52868	N.S.	0.856	-0.225	0.19523	Non-Target	NO	NO	NO	3UTR	NO	NO	NO	1106, 1126	1126	0.401, 0.398	0.401	0.4
AT1G01650	A0A178WKH2, F4HU44, Q0WMJ8	SPPL4	ATSPPL4, SPPL4	SIGNAL PEPTIDE PEPTIDASE-LIKE 4	4.05145	4.14902	4.19188	3.47597	3.61466	3.7965	4.13079	3.62904	1/1.5<=FC<=1.5	0.67	-0.579	0.00717	3.11913	3.19771	3.28005	3.07834	3.21979	3.43133	3.19896	3.24315	N.S.	0.926	-0.111	0.09196	PERMISSIVE	NO	YES	YES	NO	3UTR	3UTR	Stop codon	2220, 2229, 2500, 2504	2504	0.43, 0.422, 0.427	0.43	0.425
AT1G01660	A0A178WBJ7, A0A1P8AQW1, P0C6E7	AT1G01660		RING/U-box superfamily protein	1.21229	1.27264	1.30949	1.21334	1.36685	1.48652	1.26481	1.35557	N.S.	1.143	0.193	0.54139	0.284712	0.388324	0.36939	0.317989	0.59139	0.491846	0.347475	0.467075	1/1.5<=FC<=1.5	1.255	0.327	0.03899	N.A.	NO	NO	NO	NO	NO	NO	NO	1707, 2021	2021	0.44, 0.455	0.455	0.448
AT1G01670	A0A1P8ASI2, Q8GXQ7	AT1G01670		RING/U-box superfamily protein	0.401342	0.136241	0.326297	0.339786	0.302917	0.232279	0.28796	0.291661	N.A.	N.A.	N.A.	N.A.	0.352732	0.328467	0.404836	0.582133	0.633212	0.858432	0.362012	0.691259	UP	1.612	0.689	0.00098	Non-Target	NO	NO	NO	NO	NO	NO	NO	989, 1352, 1607	1607	0.422, 0.416, 0.426	0.426	0.421
AT1G01680	Q9LQ92	PUB54	ATPUB54, PUB54	plant U-box 54	0.139793	0.303888	0.143981	0.193076	0.467239	0.339169	0.195887	0.333161	N.A.	N.A.	N.A.	N.A.	0.0645698	0	0	0.147407	0.0677016	0	0.0215233	0.071703	N.A.	N.A.	N.A.	N.A.	N.A.	NO	NO	NO	NO	NO	NO	NO	1187	1187	0.392	0.392	0.392
AT1G01690	A0A1P8AUL3, A0A384LK19, F4HU48, Q0WWX5	PRD3	ATPRD3, PRD3	putative recombination initiation defects 3	0.754252	0.478037	0.569719	0.52675	0.669245	0.714455	0.600669	0.636816	N.S.	1.051	0.072	0.8457	1.42522	1.18876	1.18894	1.07107	1.28347	0.902595	1.26764	1.08571	1/1.5<=FC<=1.5	0.792	-0.337	0.00061	Non-Target	NO	NO	NO	NO	NO	NO	NO	1695, 1758, 1855	1855	0.408, 0.419, 0.421	0.421	0.416
AT1G01700	A0A178WL26, A0A178WNF0, A0A178WQB5, A0A1P8ASA3, A0A1P8ASC5, A0A1P8ASE8, Q9LQ89	ROPGEF2	ATROPGEF2, ROPGEF2	RHO guanyl-nucleotide exchange factor 2	0.14313	0.1606	0.194481	0.130503	0.432339	0.138365	0.16607	0.233736	N.A.	N.A.	N.A.	N.A.	0.0460139	0.0979113	0.168021	0.109795	0.342985	0.131525	0.103982	0.194768	N.A.	N.A.	N.A.	N.A.	N.A.	NO	NO	NO	NO	NO	NO	NO	1563, 1664, 1689, 1839, 1922	1922	0.391, 0.387, 0.413, 0.407, 0.401	0.413	0.4
AT1G01710	A0A178W7C0	AT1G01710		acyl-CoA thioesterase II	2.46425	2.39841	2.53772	2.74963	2.73185	2.71239	2.46679	2.73129	1/1.5<=FC<=1.5	1.362	0.446	0.03743	2.06069	2.14269	2.21463	2.30704	2.37579	2.60813	2.13934	2.43032	1/1.5<=FC<=1.5	1.104	0.142	0.01196	Non-Target	NO	NO	NO	NO	3UTR	3UTR	Stop codon	1701	1701	0.433	0.433	0.433
AT1G01715	A0A1P8AM80	AT1G01715		hypothetical protein	0.879489	1.40713	1.32202	1.66896	1.37077	1.34689	1.20288	1.46221	N.S.	1.228	0.296	0.38921	0.0973191	0	0	0	0.101863	0	0.0324397	0.0339544	N.A.	N.A.	N.A.	N.A.	Non-Target	NO	NO	NO	NO	NO	NO	NO	624, 884	884	0.425, 0.455	0.455	0.44
AT1G01720	Q39013	ATAF1	ANAC002, ANAC2, ATAF1	NAC (No Apical Meristem) domain transcriptional regulator superfamily protein	6.42886	6.72289	6.62922	6.87533	6.75202	6.74786	6.59366	6.79174	N.S.	1.24	0.311	0.15539	4.11208	4.08739	4.21462	4.41996	4.41122	4.29986	4.13803	4.37701	N.S.	1.059	0.083	0.34271	Non-Target	NO	NO	NO	NO	NO	NO	NO	1653	1653	0.475	0.475	0.475
AT1G01725	Q9LQ84	AT1G01725		adenylosuccinate synthetase	2.98903	3.18261	2.89945	2.78144	2.55526	2.80296	3.0237	2.71322	N.S.	0.826	-0.276	0.34911	3.35092	3.13601	2.99921	2.85571	2.89994	2.92447	3.16205	2.89337	1/1.5<=FC<=1.5	0.818	-0.289	0.03772	Non-Target	NO	NO	NO	NO	NO	NO	NO	537	537	0.385	0.385	0.385
AT1G01730	Q9LQ83	AT1G01730		hypothetical protein	2.44259	2.15901	2.34022	2.65447	2.61618	2.37161	2.31394	2.54742	N.S.	1.307	0.386	0.1334	3.35196	3.3556	3.46924	3.52276	3.63198	3.63408	3.39227	3.59627	N.S.	1.068	0.094	0.29313	Non-Target	NO	NO	NO	NO	NO	NO	NO	1197	1197	0.439	0.439	0.439
AT1G01740	A0A178WBE7, A0A1P8AT62, F4HU55	BSK4	BSK4	kinase with tetratricopeptide repeat domain-containing protein	0.58516	0.681134	0.631308	0.453326	0.151314	0.389795	0.632534	0.331478	N.A.	N.A.	N.A.	N.A.	0.853034	0.91039	0.977159	0.97673	0.888922	1.32847	0.913528	1.06471	1/1.5<=FC<=1.5	1.213	0.279	0.00421	Non-Target	NO	NO	NO	NO	NO	NO	NO	1624, 1644, 1648, 1911, 2045	2045	0.432, 0.423, 0.421	0.432	0.428
AT1G01750	A0A1P8AMT9, Q9LQ81	ADF11	ADF11	actin depolymerizing factor 11	4.54391	4.75032	4.69805	4.97135	4.91351	5.31601	4.66409	5.06696	UP	1.528	0.612	0.01023	4.60852	4.57197	4.43419	4.44185	4.30569	4.37938	4.53823	4.37564	N.S.	0.845	-0.243	0.09567	Non-Target	NO	NO	NO	NO	NO	NO	NO	721, 947	947	0.395, 0.415	0.415	0.405
AT1G01760	A0A178W782, A0A384L277, F4HU58	AT1G01760	AtTAD1, TAD1	denosine deaminases acting on tRNA	1.37107	1.07828	0.931549	0.827131	1.06829	0.508755	1.12697	0.801392	N.S.	0.797	-0.328	0.34786	0.969669	0.829912	1.07313	1.1762	1.14437	1.15505	0.95757	1.15854	N.S.	0.938	-0.092	0.46354	Non-Target	NO	NO	NO	NO	NO	NO	NO	1263, 1312, 1414, 1541	1541	0.436, 0.422, 0.437, 0.426	0.437	0.43
AT1G01770	A0A178WEQ4, C0Z248, Q8GZ85	AT1G01770		propionyl-CoA carboxylase	1.8158	1.78041	2.00098	1.59854	1.83811	1.67545	1.86573	1.70403	N.S.	0.903	-0.147	0.61294	1.19915	0.988324	1.44803	1.11547	1.59719	1.67023	1.21183	1.46096	N.S.	1.036	0.052	0.75382	Non-Target	NO	NO	NO	NO	NO	NO	NO	2377	2377	0.446	0.446	0.446
AT1G01780	Q1ECF5	PLIM2b	PLIM2b	GATA type zinc finger transcription factor family protein	3.65433	3.49019	3.38603	3.82259	3.26332	3.53699	3.51018	3.54097	N.S.	1.1	0.137	0.62076	2.65943	2.65835	2.81697	2.6737	2.6264	2.56022	2.71158	2.62011	1/1.5<=FC<=1.5	0.832	-0.265	1.1e-06	Non-Target	NO	NO	NO	NO	NO	NO	NO	939	939	0.407	0.407	0.407
AT1G01790	Q9ZTZ7	KEA1	ATKEA1, KEA1	K efflux antiporter 1	1.50686	1.56081	1.5386	1.39084	1.24996	1.3116	1.53542	1.31747	N.S.	0.835	-0.261	0.29368	1.10305	1.21269	1.51609	1.27075	1.68395	1.29301	1.27728	1.4159	N.S.	1.034	0.049	0.68916	Non-Target	NO	NO	NO	NO	3UTR	3UTR	Stop codon	4237, 4259	4259	0.434, 0.435	0.435	0.434
AT1G01800	A8MQD9, Q94K30, Q9LQ75	AT1G01800		NAD(P)-binding Rossmann-fold superfamily protein	5.15392	5.09889	5.05094	4.89637	4.93749	4.97238	5.10125	4.93541	N.S.	0.911	-0.135	0.46286	4.56959	4.50429	4.4428	4.61936	4.43465	4.29085	4.50556	4.44829	1/1.5<=FC<=1.5	0.914	-0.129	0.04885	STRINGENT	3UTR,3UTR	YES	NO	NO	NO	3UTR	NO	1098, 1236	1236	0.405, 0.418	0.418	0.412
AT1G01810	Q9LQ74	AT1G01810		hypothetical protein	0.930861	0.54477	1.3536	1.32697	1.70031	1.41152	0.943077	1.4796	N.S.	1.413	0.499	0.18293	1.55908	0.952617	1.0309	1.56856	1.37108	0.883236	1.18087	1.27429	N.S.	1.12	0.163	0.32102	Non-Target	NO	NO	NO	NO	NO	NO	NO	653	653	0.413	0.413	0.413
AT1G01820	Q9LQ73	PEX11C	PEX11C	peroxin 11c	3.8863	3.83254	3.78505	3.0476	3.34851	3.40451	3.83463	3.26687	DOWN	0.63	-0.667	0.00229	3.21674	3.19503	3.49366	3.28926	3.23967	3.29233	3.30181	3.27375	N.S.	0.871	-0.199	0.0559	STRINGENT	3UTR	YES	YES	NO	3UTR	3UTR	NO	1262	1262	0.406	0.406	0.406
AT1G01830	Q93YW3, Q9LQ72	AT1G01830		ARM repeat superfamily protein	3.47043	3.37829	2.98389	2.77786	2.83957	2.89915	3.27754	2.83886	1/1.5<=FC<=1.5	0.695	-0.524	0.02038	1.9318	1.8993	1.96885	2.00873	2.03227	1.93268	1.93331	1.99123	N.S.	0.958	-0.062	0.42341	Non-Target	NO	NO	NO	NO	NO	5UTR	NO	2220, 2298, 2517	2517	0.451, 0.447, 0.441	0.451	0.446
AT1G01840	Q9LQ71	AT1G01840		AP2-like ethylene-responsive transcription factor SNZ	0.990386	1.09212	0.767296	0.734381	1.18764	1.02877	0.949936	0.983598	N.S.	1.053	0.074	0.83574	1.22588	1.17296	1.31651	0.922937	0.744968	0.505192	1.23845	0.724365	N.S.	0.817	-0.292	0.05467	Non-Target	NO	NO	NO	NO	NO	NO	NO	822	822	0.451	0.451	0.451
AT1G01860	A0A178WQU2, A0A1P8ATD7, A0A384L9Y3, A0A384LPN0, O65090	PFC1	PFC1	Ribosomal RNA adenine dimethylase family protein	1.09325	1.16978	1.18011	1.05756	1.13707	1.25995	1.14771	1.15152	N.S.	1.039	0.055	0.88305	1.05037	0.830109	1.12554	1.1214	1.21076	1.13358	1.00201	1.15525	N.S.	1.078	0.108	0.30726	Non-Target	NO	NO	NO	NO	NO	3UTR	NO	753, 1076, 1163, 1177, 1373	1373	0.434, 0.443, 0.445, 0.448	0.448	0.443
AT1G01880	A0A1P8APG4, F4HU71, Q9LPD2	AT1G01880	AtGEN1, GEN1	5'-3' exonuclease family protein	0.335485	0.0797063	0.232273	0.0769777	0.191393	0.132189	0.215822	0.13352	N.A.	N.A.	N.A.	N.A.	0.162287	0.248966	0.415221	0.260335	0.348327	0.212825	0.275491	0.273829	N.A.	N.A.	N.A.	N.A.	Non-Target	NO	NO	NO	NO	NO	NO	NO	1634, 1993, 2107, 2134	2134	0.42, 0.422, 0.426, 0.425	0.426	0.423
AT1G01900	Q84WS0	SBTI1.1	ATSBT1.1, SBTI1.1	subtilase family protein	1.94505	1.82879	1.79201	1.88933	1.41342	1.671	1.85529	1.65792	N.S.	0.893	-0.163	0.57379	1.53523	1.32328	1.51633	1.56911	1.77528	1.8515	1.45828	1.73197	N.S.	0.991	-0.013	0.92519	Non-Target	NO	NO	NO	NO	NO	NO	NO	2607	2607	0.481	0.481	0.481
AT1G01910	A0A178WLD8, A0A178WMJ0, B3H5S5, F4HU77, Q949M9	AT1G01910	AtGET3a, GET3a	P-loop containing nucleoside triphosphate hydrolases superfamily protein	4.63236	4.39162	4.3852	3.77869	3.84595	3.95858	4.46973	3.86107	DOWN	0.592	-0.757	1.5e-05	4.19615	4.14877	4.30077	4.05621	4.05817	4.11409	4.21523	4.07616	1/1.5<=FC<=1.5	0.8	-0.322	2.2e-06	STRINGENT	3UTR,3UTR,3UTR,3UTR,3UTR	YES	YES	NO	3UTR	3UTR	coding_intron	1374, 1388, 1519, 1591, 1762	1762	0.42, 0.415, 0.424, 0.434, 0.422	0.434	0.423
AT1G01920	A0A178W044, A0A178W2X7, A0A1P8ATS4, A0A1P8ATT8, A0A1P8ATV6, F4HU79, Q501D3	AT1G01920		SET domain-containing protein	2.18908	2.08669	1.74459	2.15393	2.15151	2.04676	2.00678	2.1174	N.S.	1.154	0.206	0.44956	1.78621	1.57004	1.89923	1.94389	1.95443	1.97872	1.75182	1.95901	N.S.	1.09	0.124	0.21395	PERMISSIVE	NO	YES	YES	NO	NO	3UTR	NO	1873, 1907, 1953, 2025, 2197	2197	0.425, 0.431, 0.441, 0.436, 0.44	0.441	0.435
AT1G01930	Q56X22, Q9LPC8	AT1G01930		zinc finger protein-like protein	2.07073	1.97342	2.19568	2.21121	2.20746	2.13113	2.07994	2.18326	N.S.	1.155	0.208	0.4128	1.95236	1.78161	2.062	2.00543	1.92869	1.92988	1.93199	1.95466	N.S.	0.963	-0.055	0.47822	Non-Target	NO	NO	NO	3UTR	NO	NO	Stop codon	2101	2101	0.434	0.434	0.434
AT1G01940	A0A178WL95, Q9LPC7	AT1G01940		Cyclophilin-like peptidyl-prolyl cis-trans isomerase family protein	3.06108	3.10686	3.19948	3.19272	3.44591	3.4159	3.12247	3.35151	N.S.	1.293	0.371	0.13039	3.44856	3.34091	3.38146	2.99376	2.90436	2.95682	3.39031	2.95165	DOWN	0.617	-0.696	< 2e-16	PERMISSIVE	NO	YES	YES	NO	3UTR	3UTR	Stop codon	877	877	0.425	0.425	0.425
AT1G01950	A0A1P8AMI8, F4HU83, F4HU85, Q9LPC6	ARK2	ARK2, AtKINUb	armadillo repeat kinesin 2	2.29512	2.1815	2.12013	2.53988	2.47399	2.37635	2.19892	2.46341	1/1.5<=FC<=1.5	1.388	0.473	0.01523	1.74807	1.60368	1.81674	1.91884	1.90891	1.81706	1.72283	1.8816	1/1.5<=FC<=1.5	1.165	0.22	0.00019	PERMISSIVE	NO	YES	NO	NO	NO	NO	NO	2921, 2944, 3058	3058	0.428, 0.439, 0.432, 0.434	0.439	0.433
AT1G01960	Q9LPC5	EDA10	BIG3, EDA10	SEC7-like guanine nucleotide exchange family protein	3.23218	3.03932	2.89036	2.69445	2.56686	2.54988	3.05396	2.60373	1/1.5<=FC<=1.5	0.679	-0.559	0.0019	2.54769	2.41827	2.84786	2.80999	3.10265	3.30327	2.60461	3.07197	1/1.5<=FC<=1.5	1.27	0.345	5.7e-05	PERMISSIVE	NO	YES	YES	NO	3UTR	3UTR	3' UTR	5825	5825	0.442	0.442	0.442
AT1G01970	Q9LPC4	AT1G01970		Tetratricopeptide repeat (TPR)-like superfamily protein	0.757329	0.744488	0.89259	0.882727	0.842475	0.823043	0.798136	0.849415	N.S.	1.083	0.115	0.7474	1.77441	1.74537	1.85673	1.68644	1.73717	1.6173	1.79217	1.6803	1/1.5<=FC<=1.5	0.824	-0.279	0.00059	Non-Target	NO	NO	NO	NO	NO	NO	NO	1710	1710	0.419	0.419	0.419
AT1G01980	Q9LPC3	AT1G01980	AtBBE1, OGOX4	FAD-binding Berberine family protein	0.0566809	0	0	0.0405208	0.0562518	0.111277	0.0188936	0.0693497	N.A.	N.A.	N.A.	N.A.	N.E.	N.E.	N.E.	N.E.	N.E.	N.E.	N.E.	N.E.	N.E.	N.E.	N.E.	N.E.	N.A.	NO	NO	NO	NO	NO	NO	NO	1933	1933	0.482	0.482	0.482
AT1G01990	Q9LPC2	AT1G01990		hypothetical protein	2.22559	1.84894	2.32408	2.47093	2.3813	2.54902	2.13287	2.46708	N.S.	1.407	0.492	0.06668	2.30423	2.51993	2.50725	2.84727	2.84788	2.70361	2.4438	2.79959	N.S.	1.06	0.085	0.30435	Non-Target	NO	NO	NO	NO	NO	NO	NO	1483	1483	0.436	0.436	0.436
AT1G02000	Q9LPC1	GAE2	GAE2	UDP-D-glucuronate 4-epimerase 2	3.27889	3.44742	3.43009	3.38571	3.12584	3.46518	3.38547	3.32557	N.S.	1.004	0.006	0.98509	2.66283	2.57393	2.58934	2.87618	2.96533	3.19059	2.6087	3.0107	1/1.5<=FC<=1.5	1.16	0.214	0.03458	Non-Target	NO	NO	NO	NO	NO	NO	NO	2088	2088	0.459	0.459	0.459
AT1G02010	A0A1P8AMM1, A0A1P8AMM4, A0A1P8AMM7, F4HVU5, Q9C5P7, Q9C5P7-2, Q9C5P7-3	SEC1A	SEC1A	secretory 1A	1.23294	0.661593	0.661928	1.17209	0.692003	0.560946	0.852152	0.808348	N.S.	0.999	-0.001	0.99662	0.629398	0.400676	0.858411	0.453158	0.958525	1.15089	0.629495	0.85419	1/1.5<=FC<=1.5	1.246	0.318	0.03154	Non-Target	NO	NO	NO	3UTR	NO	NO	NO	1961, 2161, 2634, 2640, 2705, 2803	2803	0.413, 0.419, 0.422, 0.423, 0.439	0.439	0.423
AT1G02020	A0A1P8ATD0, O23673, Q3E6Y8	AT1G02020		nitroreductase family protein	0.860853	1.13492	1.17126	0.794018	0.736397	0.848793	1.05568	0.793069	N.S.	0.785	-0.349	0.29676	1.09398	1.18324	1.43698	1.32624	1.51347	1.61433	1.23807	1.48468	N.S.	1.099	0.137	0.20926	Non-Target	NO	NO	NO	3UTR	NO	NO	NO	2226, 2428, 2479	2479	0.479, 0.476, 0.473	0.479	0.476
AT1G02030	Q39092	AT1G02030		C2H2-like zinc finger protein	0.33147	0	0.114575	0.489561	0.347791	0.275574	0.148682	0.370975	N.A.	N.A.	N.A.	N.A.	0.520729	0.449971	0.461951	0.461091	0.471435	0.329285	0.47755	0.420604	N.S.	1.039	0.056	0.68585	N.A.	NO	NO	NO	NO	NO	NO	NO	2135	2135	0.389	0.389	0.389
AT1G02040	A0A178W296, Q3EDL3	AT1G02040		C2H2-type zinc finger family protein	0.049449	0	0	0	0	0	0.016483	0	N.A.	N.A.	N.A.	N.A.	0.0333139	0	0.0286108	0	0	0	0.0206416	0	N.A.	N.A.	N.A.	N.A.	N.A.	NO	NO	NO	NO	NO	NO	NO	1173	1173	0.437	0.437	0.437
AT1G02050	O23674	LAP6	LAP6, PKSA	Chalcone and stilbene synthase family protein	0.202289	0.163033	0.339623	0.555133	0.465782	0.518067	0.234982	0.512994	N.A.	N.A.	N.A.	N.A.	1.0375	1.15337	1.46636	1.64601	1.55629	1.31347	1.21908	1.50526	1/1.5<=FC<=1.5	1.266	0.34	0.01156	Non-Target	NO	NO	NO	NO	NO	NO	NO	1540	1540	0.472	0.472	0.472
AT1G02060	O81908	AT1G02060		Tetratricopeptide repeat (TPR)-like superfamily protein	0.354981	0.466611	0.354711	0.403875	0.43643	0.47445	0.392101	0.438252	N.A.	N.A.	N.A.	N.A.	1.02947	0.859664	1.38297	1.4316	1.47742	1.60932	1.0907	1.50611	1/1.5<=FC<=1.5	1.232	0.301	0.02989	Non-Target	NO	NO	NO	NO	NO	NO	NO	2225	2225	0.446	0.446	0.446
AT1G02065	Q3EDL2, Q8GXL3	SPL8	SPL8	squamosa promoter binding protein-like 8	0	0	0	0	0.063933	0	0	0.021311	N.A.	N.A.	N.A.	N.A.	N.E.	N.E.	N.E.	N.E.	N.E.	N.E.	N.E.	N.E.	N.E.	N.E.	N.E.	N.E.	Non-Target	NO	NO	NO	NO	NO	NO	NO	1712, 2063	2063	0.455, 0.464	0.464	0.46
AT1G02070	Q0IGM8, Q8LE17	AT1G02070		zinc ion-binding protein	0.395513	0.323364	0	0.1088	0	0	0.239626	0.0362666	N.A.	N.A.	N.A.	N.A.	0.607017	0.201172	0.65013	0.594137	0.443057	0.299713	0.486106	0.445636	N.S.	1.001	0.001	0.99689	Non-Target	NO	NO	NO	NO	NO	NO	NO	789	789	0.414	0.414	0.414
AT1G02080	A0A1P8ARB7, F4HVV6, F4HVV7	AT1G02080		transcription regulator	2.12362	2.2092	2.26779	2.28683	2.24027	2.13715	2.2002	2.22142	N.S.	1.075	0.104	0.66093	1.39643	1.13797	1.60393	1.62163	2.21735	2.48204	1.37944	2.10701	UP	2.006	1.004	2.6e-13	STRINGENT	3UTR,3UTR,3UTR	YES	NO	3UTR	3UTR	3UTR	Stop codon	7461, 7495, 7572	7572	0.426, 0.427	0.427	0.426
AT1G02090	F4HVW0, Q94JU3, Q94JU3-2	FUS5	ATCSN7, COP15, CSN7, FUS5	Proteasome component (PCI) domain protein	4.04815	4.00339	4.05057	4.3376	4.39028	4.43085	4.03404	4.38624	1/1.5<=FC<=1.5	1.485	0.571	0.00079	4.25129	4.21206	4.10959	4.19278	4.2213	4.21316	4.19098	4.20908	N.S.	0.929	-0.107	0.30292	PERMISSIVE	NO	YES	YES	3UTR	3UTR	3UTR	Stop codon	1207, 1225, 1816	1816	0.439, 0.438, 0.415	0.439	0.431
AT1G02100	F4HVW3, Q8VY08	SBI1	LCMT1, SBI1	Leucine carboxyl methyltransferase	3.60397	3.46571	3.57588	3.50891	3.43656	3.58154	3.54852	3.509	N.S.	1.021	0.03	0.90389	3.82273	3.73024	3.79063	3.89469	3.80055	3.66463	3.7812	3.78662	N.S.	0.908	-0.14	0.10445	PERMISSIVE	NO	YES	YES	3UTR	NO	3UTR	3' UTR	1326, 1335, 1431	1431	0.429, 0.428	0.429	0.428
AT1G02110	Q56W45	AT1G02110		bZIP domain class transcription factor (DUF630 and DUF632)	1.35086	1.15283	1.24895	1.66024	1.60465	1.43644	1.25088	1.56711	1/1.5<=FC<=1.5	1.498	0.583	0.03704	2.14422	2.34987	2.44842	2.54206	2.77122	2.75797	2.31417	2.69042	N.S.	1.127	0.172	0.07519	PERMISSIVE	NO	YES	NO	StopCodon	NO	NO	CDS, Stop codon	2314	2314	0.519	0.519	0.519
AT1G02120	A0A1P8AQ01, A0A1P8AQ22, F4HVW5	VAD1	VAD1	GRAM domain family protein	2.91073	2.92048	2.90753	2.8457	2.89175	2.89877	2.91291	2.87874	N.S.	1.025	0.036	0.88669	2.95198	3.05492	3.2839	3.24465	3.409	3.51415	3.09693	3.38927	N.S.	1.08	0.111	0.18026	STRINGENT	3UTR,3UTR,3UTR	YES	NO	3UTR	3UTR	3UTR	Stop codon	2145, 2150, 2251	2251	0.435, 0.432, 0.439	0.439	0.435
AT1G02130	P28188	RA-5	ARA-5, ARA5, ATRAB1B, ATRABD2A, RA-5, RABD2A	RAS 5	4.74987	4.46866	4.49785	4.42656	4.52985	4.42362	4.57213	4.46001	N.S.	0.954	-0.068	0.76689	4.34782	4.32633	4.32168	4.45886	4.49319	4.5384	4.33194	4.49682	N.S.	0.959	-0.061	0.39216	PERMISSIVE	NO	YES	YES	3UTR	NO	NO	Stop codon	1110	1110	0.406	0.406	0.406
AT1G02140	O23676	MAGO	HAP1, MAGO, MEE63	mago nashi family protein	5.34193	5.1931	5.23653	5.02224	5.02477	5.05977	5.25719	5.03559	N.S.	0.864	-0.211	0.20909	5.97286	5.86538	5.82707	5.58323	5.47925	5.34455	5.88844	5.46901	1/1.5<=FC<=1.5	0.715	-0.485	1.1e-13	STRINGENT	3UTR	YES	YES	3UTR	3UTR	3UTR	3' UTR	875	875	0.41	0.41	0.41
AT1G02145	A0A178W1D7, A8MR93, A8MR93-2, A8MR93-3, A8MR93-4, A8MR93-5, A8MR93-6	ALG12	ALG12, EBS4	homolog of asparagine-linked glycosylation 12	2.8401	2.53556	2.3434	2.12646	2.09412	2.10981	2.57302	2.11013	1/1.5<=FC<=1.5	0.667	-0.583	0.01891	2.47615	2.40165	2.54834	2.32313	2.422	2.48569	2.47538	2.41027	1/1.5<=FC<=1.5	0.857	-0.223	7e-09	Non-Target	NO	NO	NO	3UTR	NO	NO	NO	1361, 1643, 1655, 1724	1724	0.416, 0.412, 0.413	0.416	0.413
AT1G02150	Q8LPS6	AT1G02150		Tetratricopeptide repeat (TPR)-like superfamily protein	1.30852	1.12807	1.02974	1.31946	1.05139	1.38218	1.15544	1.25101	N.S.	1.148	0.199	0.53973	2.67426	2.86207	2.90985	3.02446	3.10445	3.13643	2.8154	3.08844	N.S.	0.995	-0.007	0.92796	Non-Target	NO	NO	NO	NO	3UTR	3UTR	Stop codon	1979	1979	0.47	0.47	0.47
AT1G02160	A8MQS6, Q8VZ44	AT1G02160		Cox19 family protein (CHCH motif)	3.88344	3.75289	3.52355	3.89694	3.67748	3.65047	3.71996	3.74163	N.S.	1.075	0.104	0.70509	4.81212	4.5905	4.53992	4.65519	4.63785	4.3468	4.64751	4.54661	N.S.	0.902	-0.149	0.05025	Non-Target	NO	NO	NO	NO	3UTR	3UTR	NO	524, 569	569	0.42, 0.417	0.42	0.418
AT1G02170	Q7XJE6	MC1	ATMC1, AtMCP1b, ATMCPB1, LOL3, MC1, MCP1b	metacaspase 1	3.87728	3.85907	3.939	3.98273	4.07989	4.18034	3.89179	4.08099	N.S.	1.26	0.333	0.09457	3.28953	3.3706	3.51947	3.75243	3.78744	3.85361	3.3932	3.79783	1/1.5<=FC<=1.5	1.216	0.282	3.4e-07	PERMISSIVE	NO	YES	NO	NO	NO	3UTR	NO	1451	1451	0.488	0.488	0.488
AT1G02180	Q8GYG8	AT1G02180		ferredoxin-like protein	1.12544	0.668915	0.809994	0.926286	0.426799	0.667484	0.868118	0.673523	N.S.	0.914	-0.129	0.69356	1.40323	1.784	1.74423	1.43094	1.54677	1.58871	1.64382	1.52214	1/1.5<=FC<=1.5	0.746	-0.424	0.0003	Non-Target	NO	NO	NO	NO	NO	NO	NO	922	922	0.443	0.443	0.443
AT1G02190	A0A178W820, F4HVX7, F4HVX7-2	AT1G02190	CER1-L1	Fatty acid hydroxylase superfamily	0.0504326	0.0595323	0.0768462	0.104377	0.0500484	0	0.0622704	0.0514752	N.A.	N.A.	N.A.	N.A.	0	0	0	0.0190749	0	0	0	0.0063583	N.A.	N.A.	N.A.	N.A.	N.A.	NO	NO	NO	NO	NO	NO	NO	2161, 2195	2195	0.489, 0.492	0.492	0.49
AT1G02205	A0A1P8AN63, A0A1P8AN85, F4HVY0, F4HVY0-2, F4HVY0-3	CER1	CER1, CER22	Fatty acid hydroxylase superfamily	1.52878	1.48997	1.09319	1.84553	1.81504	1.587	1.37065	1.74919	UP	1.561	0.643	0.03172	0.899166	1.03532	1.0294	0.907511	1.31687	1.33963	0.987962	1.18801	1/1.5<=FC<=1.5	1.356	0.439	0.02333	Non-Target	NO	NO	NO	NO	NO	NO	CDS	2067, 2357, 2498, 2705, 2976	2976	0.449, 0.447, 0.476, 0.422, 0.452	0.476	0.449
AT1G02220	Q5PP28	NAC003	ANAC003, NAC003	NAC domain containing protein 3	2.94262	2.77543	3.30363	3.78392	4.2937	3.82055	3.00723	3.96606	UP	2.686	1.425	1.9e-06	2.52841	2.59218	2.4891	3.03062	2.93886	2.79861	2.53656	2.9227	1/1.5<=FC<=1.5	1.374	0.459	0.001	Non-Target	NO	NO	NO	NO	NO	NO	NO	1590	1590	0.394	0.394	0.394
AT1G02230	O81913	NAC004	ANAC004, NAC004	NAC domain containing protein 4	2.94268	3.21142	3.01653	4.19516	4.42139	4.08889	3.05688	4.23514	UP	3.471	1.796	1.1e-14	1.03093	1.00186	1.05131	1.55763	1.48488	1.41514	1.02803	1.48588	UP	1.719	0.781	1.5e-05	Non-Target	NO	NO	NO	NO	NO	NO	NO	1436	1436	0.391	0.391	0.391
AT1G02250	O81914	NAC005	anac005, NAC005	NAC domain containing protein 5	0.0959463	0	0	0	0	0.267009	0.0319821	0.0890029	N.A.	N.A.	N.A.	N.A.	0.0960653	0.0613933	0.0283921	0.215168	0.10064	0.182002	0.0619502	0.165936	N.A.	N.A.	N.A.	N.A.	N.A.	NO	NO	NO	NO	NO	NO	NO	1180	1180	0.412	0.412	0.412
AT1G02260	O81915	AT1G02260		Divalent ion symporter	2.12015	1.7768	1.61451	1.28547	1.37786	1.44624	1.83715	1.36985	DOWN	0.632	-0.662	0.01995	1.69486	1.68327	1.91384	2.02484	1.90029	2.13055	1.76399	2.01856	1/1.5<=FC<=1.5	1.136	0.184	0.0062	Non-Target	NO	NO	NO	NO	NO	3UTR	NO	2482, 2579	2579	0.41, 0.407	0.41	0.408
AT1G02270	A0A1P8ATK3, O81916	AT1G02270		Calcium-binding endonuclease/exonuclease/phosphatase family	3.77962	3.78046	3.92769	3.74227	3.83502	3.94263	3.82926	3.83998	N.S.	1.065	0.09	0.71302	2.25316	2.19851	2.31006	2.2395	2.19085	1.97348	2.25391	2.13461	N.S.	0.942	-0.086	0.13467	Non-Target	NO	NO	NO	NO	NO	3UTR	Stop codon	1737, 1777	1777	0.391, 0.396	0.396	0.394
AT1G02280	O23680	TOC33	ATTOC33, PPI1, TOC33	translocon at the outer envelope membrane of chloroplasts 33	2.3109	2.41737	2.38723	2.12784	1.71322	1.64491	2.37184	1.82866	DOWN	0.655	-0.611	0.04294	3.2384	3.18826	3.17758	2.97721	2.91817	2.97258	3.20141	2.95599	DOWN	0.666	-0.585	< 2e-16	STRINGENT	3UTR,3UTR	YES	YES	NO	3UTR	3UTR	NO	1170, 1214	1214	0.409, 0.415	0.415	0.412
AT1G02290	Q6GKW8	AT1G02290		hypothetical protein	0.854385	0.688368	0.714412	1.31791	1.11739	0.71194	0.752388	1.04908	N.S.	1.468	0.554	0.13938	1.60131	1.6694	1.65914	2.02071	1.90584	1.78821	1.64328	1.90492	1/1.5<=FC<=1.5	1.121	0.165	0.02311	Non-Target	NO	NO	NO	NO	NO	NO	NO	1767	1767	0.415	0.415	0.415
AT1G02300	A0A178WNR0, F4HVZ1, Q56XY7	AT1G02300	AtcathB1	Cysteine proteinases superfamily protein	0.0388043	0	0	0	0.0755044	0	0.0129348	0.0251681	N.A.	N.A.	N.A.	N.A.	0.259732	0.203213	0.447959	0.358157	0.239514	0.423856	0.303635	0.340509	N.S.	1.007	0.01	0.95835	Non-Target	NO	NO	NO	NO	NO	NO	NO	1464	1464	0.402	0.402	0.402
AT1G02305	Q93VC9	AT1G02305	AtcathB2	Cysteine proteinases superfamily protein	4.93676	4.93543	5.05628	4.30586	4.07811	4.35384	4.97616	4.24594	DOWN	0.528	-0.92	2.2e-06	4.8858	4.90924	4.81878	5.0041	4.94741	4.89405	4.87127	4.94852	1/1.5<=FC<=1.5	0.836	-0.258	6.4e-06	STRINGENT	3UTR	YES	NO	NO	3UTR	3UTR	NO	1407	1407	0.402	0.402	0.402
AT1G02310	A0A178WL81, Q9FZ29	MAN1	MAN1	Glycosyl hydrolase superfamily protein	1.33153	1.32319	1.64922	2.06336	2.3053	2.16756	1.43465	2.17874	UP	2.365	1.242	0.00013	1.056	1.05451	1.07211	0.66991	0.568297	0.584191	1.06087	0.607466	N.S.	0.782	-0.356	0.08834	Non-Target	NO	NO	NO	NO	NO	NO	NO	1390, 1415	1415	0.426, 0.433	0.433	0.43
AT1G02320	Q3EDK7	AT1G02320		hypothetical protein	0.660916	0	0	0	0	0	0.220305	0	N.A.	N.A.	N.A.	N.A.	N.E.	N.E.	N.E.	N.E.	N.E.	N.E.	N.E.	N.E.	N.E.	N.E.	N.E.	N.E.	N.A.	NO	NO	NO	NO	NO	NO	NO	147	147	0.367	0.367	0.367
AT1G02330	F4HVZ5	AT1G02330	CSU2	integrator complex subunit-like protein	3.28683	3.07256	3.10915	3.28967	3.51656	3.49399	3.15618	3.43341	1/1.5<=FC<=1.5	1.372	0.456	0.03146	3.25882	2.99185	3.18841	3.20316	3.23065	3.12072	3.14636	3.18485	N.S.	1.071	0.099	0.32171	Non-Target	NO	NO	NO	NO	3UTR	NO	Stop codon	1193	1193	0.42	0.42	0.42
AT1G02335	Q9FZ27	GL22	GL22, PDGLP2	germin-like protein subfamily 2 member 2 precursor	3.03454	3.19752	3.05696	2.32183	2.15037	1.90579	3.09634	2.126	DOWN	0.402	-1.313	1.8e-06	3.84254	3.78176	3.89089	3.80197	3.68663	3.65254	3.83839	3.71371	1/1.5<=FC<=1.5	0.838	-0.254	1.6e-07	Non-Target	NO	NO	NO	NO	NO	NO	NO	990	990	0.411	0.411	0.411
AT1G02340	A0A1P8AWQ4, Q9FE22	HFR1	FBI1, HFR1, REP1, RSF1	basic helix-loop-helix (bHLH) DNA-binding superfamily protein	2.06714	2.99192	3.28035	2.03445	2.88128	2.73133	2.7798	2.54902	N.S.	0.923	-0.115	0.71852	1.83254	2.02071	2.09043	2.3509	2.29153	1.99087	1.98122	2.2111	N.S.	0.953	-0.07	0.62668	Non-Target	NO	NO	NO	NO	NO	3UTR	NO	1391, 1466	1466	0.381, 0.37	0.381	0.376
AT1G02350	F4HVZ8	AT1G02350		protoporphyrinogen oxidase-like protein	1.28121	0.361607	0.459145	0	0.31424	0	0.700654	0.104747	N.S.	0.873	-0.196	0.17626	1.27564	1.42538	1.40569	1.21134	1.37106	1.42971	1.3689	1.33737	1/1.5<=FC<=1.5	0.8	-0.322	0.00033	Non-Target	NO	NO	NO	NO	NO	NO	NO	423	423	0.44	0.44	0.44
AT1G02360	A0A1P8AWZ7, A0A1P8AX35, Q9FZ25	AT1G02360		Chitinase family protein	3.28087	3.01494	2.96173	3.1075	2.77184	3.30172	3.08585	3.06035	N.S.	1.045	0.063	0.84123	5.21717	5.29339	5.28042	5.32837	5.15792	5.22344	5.26366	5.23658	1/1.5<=FC<=1.5	0.807	-0.309	0.00804	Non-Target	NO	NO	NO	NO	NO	NO	NO	1118, 1151, 1206	1206	0.429, 0.428, 0.421	0.429	0.426
AT1G02370	Q9FZ24	AT1G02370		Tetratricopeptide repeat (TPR)-like superfamily protein	0.313468	0.289506	0.300065	0.148976	0.290571	0.108242	0.301013	0.182596	N.A.	N.A.	N.A.	N.A.	2.23735	2.28233	2.3485	2.45378	2.48472	2.68564	2.2894	2.54138	1/1.5<=FC<=1.5	1.195	0.257	0.01904	Non-Target	NO	NO	NO	NO	NO	NO	NO	1986	1986	0.419	0.419	0.419
AT1G02380	Q8GY74, Q9FZ23	AT1G02380		transmembrane protein	1.02202	0.987633	1.39317	1.36175	1.6888	1.65223	1.13427	1.56759	N.S.	1.569	0.65	0.07564	0.580599	0.897747	0.559576	0.396687	0.699168	0.624705	0.679307	0.57352	N.S.	0.806	-0.311	0.06384	Non-Target	NO	NO	NO	NO	NO	NO	NO	1317	1317	0.386	0.386	0.386
AT1G02390	Q9FZ22	GPAT2	ATGPAT2, GPAT2	glycerol-3-phosphate acyltransferase 2	1.08961	0.413957	0.51156	0.404308	0.827352	0.711232	0.671709	0.64763	N.S.	0.983	-0.024	0.94652	0.967658	1.15548	0.940463	1.49335	1.59208	1.5322	1.0212	1.53921	UP	1.606	0.683	4.4e-05	Non-Target	NO	NO	NO	NO	NO	NO	NO	2074	2074	0.419	0.419	0.419
AT1G02400	A0A178W3I2, A0A178WCV5, A0A1P8AWJ2, Q9FZ21	GA2OX6	ATGA2OX4, ATGA2OX6, DTA1, GA2OX6	gibberellin 2-oxidase 6	3.17046	3.39275	3.39627	4.1177	4.09081	4.17669	3.31982	4.1284	UP	2.338	1.225	6e-09	2.84274	2.59325	2.73547	3.05805	2.72607	2.52478	2.72382	2.76963	N.S.	0.958	-0.062	0.62121	Non-Target	NO	NO	NO	NO	NO	NO	NO	1414, 1479	1479	0.398, 0.389	0.398	0.394
AT1G02405	Q6NMD9	AT1G02405		proline-rich family protein	0.0820352	0.18378	0	0.217617	0	0	0.0886049	0.072539	N.A.	N.A.	N.A.	N.A.	0.370574	0.349635	0.0531853	0.140104	0.235636	0	0.257798	0.125247	N.A.	N.A.	N.A.	N.A.	N.A.	NO	NO	NO	NO	NO	NO	NO	754	754	0.411	0.411	0.411
AT1G02410	Q8GWR0	AT1G02410	COX11	cytochrome c oxidase assembly protein CtaG / Cox11 family	3.4869	3.41328	3.44154	3.53992	3.71484	3.55004	3.44724	3.6016	N.S.	1.223	0.29	0.1533	3.39247	3.17255	3.38696	3.35783	3.14029	2.83914	3.31733	3.11242	N.S.	0.919	-0.122	0.17244	PERMISSIVE	NO	YES	YES	3UTR, StopCodon	NO	NO	Stop codon	1278, 1284, 1456	1456	0.402, 0.415, 0.408	0.415	0.408
AT1G02420	Q9FZ19	AT1G02420		Pentatricopeptide repeat (PPR) superfamily protein	0.45341	0.240269	0.306612	0.464756	0.56096	0.523926	0.33343	0.516547	N.A.	N.A.	N.A.	N.A.	1.36079	1.22682	1.24936	1.83622	1.81846	1.67931	1.27899	1.778	1/1.5<=FC<=1.5	1.179	0.238	0.01358	Non-Target	NO	NO	NO	NO	NO	NO	NO	1520	1520	0.405	0.405	0.405
AT1G02430	A0A1P8ARH7, F4HXI4, Q84VV7	ARFD1B	ARFD1B, ATARFD1B	ADP-ribosylation factor D1B	2.84783	2.35197	1.81922	1.37164	1.22804	1.6016	2.33967	1.40043	DOWN	0.379	-1.399	0.00111	2.22444	2.15045	2.19815	1.84709	1.93483	1.42912	2.19101	1.73701	1/1.5<=FC<=1.5	0.695	-0.525	0.00083	Non-Target	NO	NO	NO	NO	NO	NO	NO	762, 968	968	0.399, 0.398	0.399	0.398
AT1G02440	A0A1P8AVU2, F4HXI5	ARFD1A	ARFD1A, ATARFD1A	ADP-ribosylation factor D1A	2.07987	1.35252	0.992436	0.811156	0.737379	0.994909	1.47494	0.847815	N.S.	0.595	-0.748	0.09007	1.06579	1.23161	0.933183	0.622693	0.702368	0.889373	1.07686	0.738145	1/1.5<=FC<=1.5	0.693	-0.528	0.02877	Non-Target	NO	NO	NO	NO	NO	NO	NO	649, 756	756	0.413, 0.43	0.43	0.422
AT1G02450	Q9FNZ5	NIMIN1	NIMIN-1, NIMIN1	NIM1-interacting 1	0.502672	0.570479	0.156673	0.14404	0.195715	0	0.409941	0.113252	N.A.	N.A.	N.A.	N.A.	0	0	0.140479	0.0980791	0.0872258	0	0.0468264	0.0617683	N.A.	N.A.	N.A.	N.A.	N.A.	NO	NO	NO	NO	NO	NO	NO	623	623	0.377	0.377	0.377
AT1G02460	Q9FWX5	AT1G02460		Pectin lyase-like superfamily protein	3.56442	3.68406	3.60113	3.39405	2.70198	2.64325	3.61654	2.91309	DOWN	0.594	-0.753	0.01097	1.68081	1.67207	1.92251	1.78715	1.8745	2.27668	1.75846	1.97944	N.S.	1.078	0.108	0.51139	Non-Target	NO	NO	NO	NO	NO	NO	NO	2079	2079	0.42	0.42	0.42
AT1G02475	A0A178W8M2, Q94K52	AT1G02475		Polyketide cyclase/dehydrase and lipid transport superfamily protein	0.793798	0.714181	0.661961	0.210759	0.103756	0.367911	0.723313	0.227476	N.S.	0.545	-0.875	0.07241	1.34075	1.51083	1.75117	1.68462	1.82648	1.83792	1.53425	1.78301	N.S.	0.94	-0.09	0.33648	Non-Target	NO	NO	NO	NO	3UTR	3UTR	NO	1091	1091	0.384	0.384	0.384
AT1G02500	P23686	SAM1	AtSAM1, MAT1, METK1, SAM-1, SAM1	S-adenosylmethionine synthetase 1	6.77201	6.63298	6.61869	7.26046	7.01039	6.9487	6.67456	7.07318	UP	1.557	0.639	0.00025	6.55888	6.68964	6.69398	6.86992	6.88735	7.00591	6.6475	6.92106	N.S.	0.975	-0.036	0.74262	STRINGENT	3UTR,3UTR	YES	YES	CDS, 5UTR	3UTR	3UTR	NO	1530, 1748	1748	0.451, 0.467	0.467	0.459
AT1G02510	Q9FWX6	TPK4	ATKCO4, ATTPK4, KCO4, TPK4	Outward rectifying potassium channel protein	0.366715	0.123104	0	0.14604	0.284977	0.105952	0.163273	0.17899	N.A.	N.A.	N.A.	N.A.	N.E.	N.E.	N.E.	N.E.	N.E.	N.E.	N.E.	N.E.	N.E.	N.E.	N.E.	N.E.	N.A.	NO	NO	NO	NO	NO	NO	NO	1086	1086	0.424	0.424	0.424
AT1G02520	Q9FWX7	ABCB11	ABCB11, MDR8, PGP11	P-glycoprotein 11	2.79168	2.78031	2.65104	2.44977	2.71177	2.62624	2.74101	2.59593	N.S.	0.929	-0.106	0.65928	2.32254	2.47543	2.71548	3.06409	3.34997	3.4999	2.50449	3.30465	UP	1.799	0.847	4.8e-15	Non-Target	NO	NO	NO	NO	NO	NO	NO	4052, 4306, 4310	4310	0.433, 0.44	0.44	0.435
AT1G02530	A0A1P8ANT3, Q9FWX8	ABCB12	ABCB12, PGP12	P-glycoprotein 12	0.0388024	0.0609041	0	0	0.0260127	0.0521683	0.0332355	0.0260603	N.A.	N.A.	N.A.	N.A.	0.108604	0.0991184	0.132383	0.165668	0.236711	0.0904319	0.113369	0.16427	N.A.	N.A.	N.A.	N.A.	N.A.	NO	NO	NO	NO	NO	NO	NO	4114, 4221	4221	0.438, 0.437	0.438	0.438
AT1G02540	Q9FWX9	AT1G02540		hypothetical protein	0.0691025	0	0	0	0	0	0.0230342	0	N.A.	N.A.	N.A.	N.A.	N.E.	N.E.	N.E.	N.E.	N.E.	N.E.	N.E.	N.E.	N.E.	N.E.	N.E.	N.E.	N.A.	NO	NO	NO	NO	NO	NO	NO	873	873	0.414	0.414	0.414
AT1G02560	Q9S834	CLPP5	CLPP5, NCLPP1, NCLPP5	nuclear encoded CLP protease 5	3.69171	3.45151	3.43304	3.05826	3.04854	2.96809	3.52542	3.02496	DOWN	0.652	-0.616	0.00082	3.97479	4.00267	4.12954	3.83642	3.95098	3.92998	4.03567	3.90579	1/1.5<=FC<=1.5	0.787	-0.346	1.7e-08	STRINGENT	3UTR	YES	YES	NO	3UTR	3UTR	Stop codon	1479	1479	0.428	0.428	0.428
AT1G02570	Q1PFZ3	AT1G02570		transmembrane protein	1.07412	1.23007	1.38316	0.965166	0.93777	1.48255	1.22911	1.1285	N.S.	0.978	-0.032	0.93371	0.896858	0.773638	0.981456	0.866086	0.69241	0.905113	0.883984	0.821203	N.S.	0.934	-0.099	0.56089	Non-Target	NO	NO	NO	NO	NO	NO	NO	1010	1010	0.431	0.431	0.431
AT1G02575	A0A178WGQ4, F4HXK1	AT1G02575		transmembrane protein	1.55913	1.20079	1.30435	0.838284	0.650904	1.33455	1.35476	0.941247	N.S.	0.777	-0.363	0.30144	1.23755	1.39581	1.14057	1.33801	1.07948	1.27279	1.25798	1.23009	N.S.	0.92	-0.12	0.45068	Non-Target	NO	NO	NO	NO	NO	NO	NO	1047	1047	0.412	0.412	0.412
AT1G02580	A0A1P8AVN9, O65312	MEA	EMB173, FIS1, MEA, SDG5	SET domain-containing protein	1.18041	1.46399	1.35048	0.852976	0.974209	0.984808	1.33163	0.937331	N.S.	0.671	-0.577	0.07808	0.210438	0.276112	0.244385	0.327046	0.433305	0.363962	0.243645	0.374771	1/1.5<=FC<=1.5	1.491	0.576	0.0095	N.A.	NO	NO	NO	NO	NO	NO	NO	1819, 2341	2341	0.403, 0.405	0.405	0.404
AT1G02610	A0A178W227, A0A178W269, A0A178W3R9, A0A1P8AS75, A0A1P8AS78	AT1G02610		RING/FYVE/PHD zinc finger superfamily protein	3.4374	3.82363	4.2871	3.06124	3.89194	3.94483	3.84937	3.63267	N.S.	0.912	-0.133	0.6981	0.631002	0.399416	0.794505	0.654914	0.739754	0.492592	0.608308	0.629086	N.S.	1.014	0.02	0.91475	Non-Target	NO	NO	NO	NO	NO	NO	NO	831, 1126, 1259	1259	0.331, 0.338, 0.332	0.338	0.334
AT1G02640	Q94KD8	BXL2	ATBXL2, BXL2	beta-xylosidase 2	3.04176	3.23992	3.21302	3.14145	2.49672	2.57219	3.1649	2.73679	N.S.	0.756	-0.404	0.15134	2.12197	2.34226	3.10578	2.36741	2.60169	2.87832	2.52334	2.61581	N.S.	0.882	-0.181	0.27893	Non-Target	NO	NO	NO	NO	NO	NO	NO	2773	2773	0.455	0.455	0.455
AT1G02650	A0A1P8ARE6, Q9FWY3	AT1G02650		Tetratricopeptide repeat (TPR)-like superfamily protein	0.520647	0.508325	0.596406	0.533345	0.900354	0.406373	0.541793	0.613357	N.S.	1.111	0.152	0.65278	0.286991	0.282161	0.287327	0.44623	0.170498	0.300808	0.285493	0.305845	1/1.5<=FC<=1.5	1.316	0.396	0.02072	N.A.	NO	NO	NO	NO	NO	NO	NO	1824, 1916	1916	0.441, 0.448	0.448	0.444
AT1G02660	F4HXL0	AT1G02660	PLIP2	alpha/beta-Hydrolases superfamily protein	1.99362	2.41877	2.50051	2.10851	2.28093	2.12996	2.3043	2.17314	N.S.	0.919	-0.122	0.69486	1.11069	1.03837	1.15581	1.04408	1.33357	1.34247	1.10162	1.24004	N.S.	0.908	-0.139	0.10781	Non-Target	NO	NO	NO	NO	NO	3UTR	NO	2842	2842	0.416	0.416	0.416
AT1G02670	A0A1P8ASB1, A0A1P8ASB2, A0A1P8ASB4, A0A1P8ASC7, A0A1P8ASE4, A0A1P8ASG8, F4HXL1	AT1G02670		P-loop containing nucleoside triphosphate hydrolases superfamily protein	0.263548	0.11572	0.394176	0.0970587	0.143204	0.0573411	0.257814	0.0992012	N.A.	N.A.	N.A.	N.A.	0.194299	0.167166	0.164472	0.068941	0.146034	0	0.175312	0.0716582	N.A.	N.A.	N.A.	N.A.	N.A.	NO	NO	NO	NO	NO	NO	NO	1928, 2161, 2311, 2321, 2393, 2571, 2653	2653	0.433, 0.424, 0.423, 0.421, 0.426	0.433	0.425
AT1G02680	Q6NQH4	TAF13	TAF13	TBP-associated factor 13	2.71351	2.27455	2.58789	2.70703	2.5709	2.66615	2.52532	2.64803	N.S.	1.149	0.2	0.47485	2.95469	2.81998	2.85686	2.82439	2.71393	2.4942	2.87718	2.67751	N.S.	0.908	-0.139	0.08282	Non-Target	NO	NO	NO	NO	NO	NO	3' UTR	907	907	0.407	0.407	0.407
AT1G02690	F4HXL3, Q9FWY7	IMPA-6	IMPA-6	importin alpha isoform 6	1.6318	1.36714	1.22245	1.15908	0.745248	0.885459	1.40713	0.92993	N.S.	0.627	-0.674	0.05429	2.9443	3.02098	3.21751	3.05326	3.19384	3.25672	3.06093	3.16794	N.S.	1.011	0.015	0.84912	PERMISSIVE	NO	NO	YES	NO	NO	NO	NO	1940, 2171	2171	0.436, 0.446	0.446	0.441
AT1G02700	A0A178WJA3, Q9FWY8	AT1G02700		GATA transcription factor-like protein	0.498097	0.886657	0.725305	0.549795	0.570283	0.475046	0.703353	0.531708	N.S.	0.896	-0.158	0.62568	0.869573	0.491431	0.681544	1.17556	0.768752	0.648119	0.68085	0.864143	N.S.	0.967	-0.049	0.78709	N.A.	NO	NO	NO	NO	NO	NO	NO	1356	1356	0.421	0.421	0.421
AT1G02705	A0A178WC67, A0A1P8AV59	AT1G02705		hypothetical protein	1.16517	0.62184	1.10472	2.39394	1.03924	1.54949	0.963909	1.66089	N.S.	1.686	0.754	0.08928	2.29497	2.02571	2.09217	2.52552	2.55313	2.42053	2.13762	2.49973	1/1.5<=FC<=1.5	1.311	0.391	0.02793	Non-Target	NO	NO	NO	NO	NO	NO	NO	426	426	0.523	0.523	0.523
AT1G02720	Q9FWY9	GATL5	AtGATL5, GATL5	galacturonosyltransferase 5	3.32629	3.27838	3.24347	2.79836	2.48266	2.57865	3.28272	2.61989	DOWN	0.556	-0.848	2.7e-05	2.37621	2.38546	2.40848	2.325	2.46417	2.62014	2.39005	2.46977	N.S.	0.933	-0.1	0.43745	Non-Target	NO	NO	NO	NO	NO	NO	NO	1947, 2062	2062	0.414, 0.419	0.419	0.416
AT1G02730	Q9SRW9	CSLD5	ATCSLD5, CSLD5, SOS6	cellulose synthase-like D5	0.532783	0.123127	0.0618794	0.0753069	0.0789285	0.0274654	0.239263	0.0605669	N.A.	N.A.	N.A.	N.A.	1.88938	1.97784	2.30283	2.07634	2.3154	2.50128	2.05668	2.29767	N.S.	1.03	0.043	0.74237	Non-Target	NO	NO	NO	NO	NO	NO	NO	3925	3925	0.444	0.444	0.444
AT1G02740	Q4V3E2	AT1G02740	MRG2	MRG family protein	1.29232	0.834588	1.29898	1.20653	1.56562	1.41335	1.14196	1.39517	N.S.	1.278	0.354	0.29293	1.65409	1.81665	1.92096	1.90801	1.81683	1.88874	1.79723	1.8712	N.S.	0.96	-0.059	0.57342	PERMISSIVE	NO	YES	YES	NO	NO	NO	NO	1566	1566	0.393	0.393	0.393
AT1G02750	A0A178W083, A0A178W0Y0, F4HXM2, Q8GWK1	AT1G02750		Drought-responsive family protein	2.88265	2.89264	3.05099	3.45372	3.55865	3.50158	2.94209	3.50465	UP	1.83	0.872	5.4e-05	2.97772	2.74352	2.8976	3.10004	2.81735	2.8153	2.87295	2.9109	N.S.	0.92	-0.121	0.20429	Non-Target	NO	NO	NO	NO	NO	NO	NO	828, 1103	1103	0.386, 0.39	0.39	0.388
AT1G02770	Q9SRX1	AT1G02770		hypothetical protein	0	0.107412	0.200841	0	0	0	0.102751	0	N.A.	N.A.	N.A.	N.A.	0.0312399	0.0294083	0.151169	0.173156	0.49079	0.320124	0.0706057	0.328024	N.A.	N.A.	N.A.	N.A.	N.A.	NO	NO	NO	NO	NO	NO	NO	1233	1233	0.421	0.421	0.421
AT1G02780	Q9SRX2	emb2386	emb2386	Ribosomal protein L19e family protein	6.39069	6.11132	5.93449	5.45766	5.52111	5.43286	6.1455	5.47054	DOWN	0.554	-0.851	3.2e-06	7.69065	7.76843	7.59052	7.45919	7.35386	7.32993	7.6832	7.38099	1/1.5<=FC<=1.5	0.729	-0.456	1.1e-05	STRINGENT	3UTR	YES	YES	NO	3UTR	3UTR, 5UTR, CDS	Stop codon	1109	1109	0.429	0.429	0.429
AT1G02790	P49062	PGA4	PGA4	polygalacturonase 4	0.70056	0.0771277	0	0	0.0649766	0.0660489	0.259229	0.0436752	N.S.	0.878	-0.187	0.20786	N.E.	N.E.	N.E.	N.E.	N.E.	N.E.	N.E.	N.E.	N.E.	N.E.	N.E.	N.E.	N.A.	NO	NO	NO	NO	NO	NO	NO	1686	1686	0.41	0.41	0.41
AT1G02810	Q9SRX4	AT1G02810		Plant invertase/pectin methylesterase inhibitor superfamily	2.71062	2.10645	2.05511	1.67773	1.5245	1.81437	2.29073	1.6722	DOWN	0.552	-0.857	0.00484	3.10078	2.98093	3.1001	3.04211	3.01761	3.17588	3.06061	3.07853	1/1.5<=FC<=1.5	1.11	0.15	0.03715	Non-Target	NO	NO	NO	NO	NO	NO	NO	2132	2132	0.435	0.435	0.435
AT1G02813	A0A178WJF8	AT1G02813		pectinesterase (Protein of unknown function, DUF538)	0.0977146	0.216622	0	0.136327	0	0	0.104779	0.0454425	N.A.	N.A.	N.A.	N.A.	1.45246	1.25537	1.00754	1.29931	0.739417	0.884762	1.23846	0.974495	N.S.	0.756	-0.403	0.07092	Non-Target	NO	NO	NO	NO	NO	NO	NO	652	652	0.411	0.411	0.411
AT1G02816	Q9SRX5	AT1G02816		pectinesterase (Protein of unknown function, DUF538)	3.76128	3.69102	3.61702	3.73306	3.91894	3.93973	3.68978	3.86391	N.S.	1.248	0.319	0.10473	3.66433	3.63135	3.46159	3.74942	3.75786	3.60788	3.58576	3.70505	N.S.	0.915	-0.129	0.36097	Non-Target	NO	NO	NO	NO	NO	NO	NO	1602	1602	0.375	0.375	0.375
AT1G02820	Q9SRX6	LEA3	AtLEA3, LEA2, LEA3	Late embryogenesis abundant 3 (LEA3) family protein	0.0747456	0	0.215956	0.104636	0.143306	0	0.0969006	0.0826472	N.A.	N.A.	N.A.	N.A.	0.249248	0.669145	0.394198	1.07614	1.58627	1.38386	0.43753	1.34876	UP	2.893	1.533	8.9e-07	Non-Target	NO	NO	NO	NO	NO	NO	NO	816	816	0.396	0.396	0.396
AT1G02840	O22315, O22315-2, O22315-3	SR34	At-SR34, ATSRP34, SR1, SR34, SRP34	RNA-binding (RRM/RBD/RNP motifs) family protein	3.44434	3.39052	3.40235	3.31085	3.2624	3.28743	3.4124	3.28689	N.S.	0.944	-0.083	0.70248	5.10474	5.1043	5.24695	5.15906	5.2402	5.25849	5.152	5.21925	1/1.5<=FC<=1.5	0.797	-0.327	7.4e-09	PERMISSIVE	NO	YES	YES	NO	3UTR	3UTR	Stop codon	1366, 1517, 1555, 1748, 1855	1855	0.459, 0.439, 0.458, 0.441, 0.451	0.459	0.45
AT1G02850	A0A178W6X9, A0A2H1ZE91, B3H5Q1, B3H5Q1-2, B3H5Q1-3, B3H5Q1-4, B3H5Q1-5, Q570I7	BGLU11	BGLU11	beta glucosidase 11	1.3933	0.997589	0.94296	1.77797	2.504	1.82523	1.11128	2.03574	UP	3.26	1.705	2.5e-05	3.24553	3.31679	3.38829	3.79905	3.78062	3.58209	3.31687	3.72059	UP	1.513	0.598	4.8e-10	Non-Target	NO	NO	NO	NO	3UTR	NO	NO	1804, 1943, 2024, 2093, 2193	2193	0.409, 0.408, 0.42	0.42	0.411
AT1G02860	A0A1P8AR01, Q9SRX9, Q9SRX9-2	NLA	BAH1, NLA, SYG1	SPX (SYG1/Pho81/XPR1) domain-containing protein	2.50152	2.53466	2.91181	2.471	2.83884	2.54276	2.64933	2.61753	N.S.	1.013	0.018	0.95851	1.86751	1.93311	2.42536	2.21345	2.3139	2.16613	2.07533	2.23116	N.S.	1	0	0.99934	Non-Target	NO	NO	NO	3UTR	NO	NO	NO	1065, 1511, 1517	1517	0.386, 0.385	0.386	0.386
AT1G02870	Q8RWK5, Q9SRY0	AT1G02870		nucleolar-like protein	2.32365	2.22315	2.03865	2.32999	2.4535	2.57493	2.19515	2.45281	N.S.	1.315	0.395	0.16686	3.74473	3.82842	3.8226	3.65815	3.62245	3.55424	3.79859	3.61162	N.S.	0.89	-0.168	0.09682	Non-Target	NO	NO	NO	3UTR	NO	3UTR	NO	847	847	0.421	0.421	0.421
AT1G02880	A0A1P8ARA0, B3H6N1, B9DGU7, B9DGU7-2, B9DGU7-3	TPK1	TPK1	thiamin pyrophosphokinase1	3.66661	3.56256	3.7532	3.98936	4.35386	4.25395	3.66079	4.19906	UP	1.778	0.83	0.00018	3.01432	3.13123	3.17788	3.34284	3.30077	3.37191	3.10781	3.33851	1/1.5<=FC<=1.5	1.172	0.229	0.0087	PERMISSIVE	NO	YES	NO	NO	NO	NO	NO	1167, 1194, 1255, 1361, 1406, 1638	1638	0.387, 0.392, 0.41, 0.406, 0.402, 0.404	0.41	0.4
AT1G02890	F4HZ81, F4HZ82	AT1G02890		AAA-type ATPase family protein	3.43713	3.44655	3.5791	3.58551	3.74666	3.55217	3.48759	3.62811	N.S.	1.2	0.263	0.2084	2.38077	2.14149	2.65254	2.75861	2.9022	3.06678	2.3916	2.9092	1/1.5<=FC<=1.5	1.33	0.411	2.3e-07	Non-Target	NO	NO	NO	3UTR	NO	3UTR	NO	4047, 4233	4233	0.425, 0.429	0.429	0.427
AT1G02900	Q9SRY3	RALF1	ATRALF1, RALF1, RALFL1	rapid alkalinization factor 1	4.64004	4.55988	4.75207	5.39127	5.28912	5.55458	4.65066	5.41166	UP	2.226	1.154	3e-09	5.84377	5.79717	5.86014	5.82571	5.45349	5.22503	5.83369	5.50141	DOWN	0.618	-0.695	6.8e-13	Non-Target	NO	NO	NO	NO	NO	NO	NO	854	854	0.395	0.395	0.395
AT1G02910	A0A1P8ANG6, Q9SRY4	LPA1	LPA1	tetratricopeptide repeat (TPR)-containing protein	2.20631	1.93019	2.06036	2.35796	2.25288	2.27708	2.06562	2.29598	N.S.	1.311	0.39	0.10222	1.77376	1.842	2.09094	1.95645	2.06869	1.84896	1.90223	1.95803	N.S.	0.972	-0.041	0.71824	Non-Target	NO	NO	NO	CDS, StopCodon	3UTR	3UTR	Stop codon	1634, 1690	1690	0.435, 0.439	0.439	0.437
AT1G02920	Q9SRY5	GSTF7	ATGST11, ATGSTF7, ATGSTF8, GST11, GSTF7	glutathione S-transferase 7	0.81142	0.207836	0.377264	0.734689	1.06093	1.02516	0.465506	0.940259	N.S.	1.58	0.66	0.11655	2.54687	3.19752	3.45363	3.32299	3.80788	3.37163	3.06601	3.50083	N.S.	0.994	-0.008	0.96503	Non-Target	NO	NO	NO	NO	NO	NO	NO	1213	1213	0.377	0.377	0.377
AT1G02930	P42760	GSTF6	ATGST1, ATGSTF3, ATGSTF6, ERD11, GST1, GSTF6	glutathione S-transferase 6	2.43069	1.61512	1.94058	2.41134	3.00359	2.39681	1.99546	2.60391	UP	1.801	0.849	0.01844	2.5075	2.96052	3.11612	2.88002	3.40015	3.10445	2.86138	3.12821	N.S.	0.993	-0.011	0.94779	Non-Target	NO	NO	NO	NO	NO	NO	NO	866, 1186	1186	0.383, 0.409	0.409	0.396
AT1G02950	A0A178WJ49, A0A1P8AMT5, B3H520, Q84TK0, Q84TK0-2	GSTF4	ATGSTF4, GST31, GSTF4	glutathione S-transferase F4	0.127676	0	0.100416	0.539872	0.122285	0	0.0760308	0.220719	N.A.	N.A.	N.A.	N.A.	3.39131	3.20215	3.17225	3.0053	2.9213	2.9146	3.25524	2.94707	1/1.5<=FC<=1.5	0.672	-0.573	< 2e-16	Non-Target	NO	NO	NO	NO	NO	NO	NO	904, 910, 913, 940, 972	972	0.391, 0.394, 0.399, 0.404, 0.403	0.404	0.398
AT1G02960	A0A1P8ASC9, C0Z2W6, F4HZ93, F4HZ95, Q8GWB5	AT1G02960		kinetochore protein	2.10597	1.96955	1.82347	2.09349	1.96992	2.20742	1.96633	2.09028	N.S.	1.183	0.242	0.3606	1.36348	1.22443	1.36058	1.48728	1.47889	1.29058	1.31616	1.41892	N.S.	1.135	0.183	0.18228	Non-Target	NO	NO	NO	3UTR	NO	NO	NO	1730, 1757, 1821, 1833, 1848, 1924	1924	0.406, 0.402, 0.404	0.406	0.404
AT1G02965	F4HZ96	AT1G02965		hypothetical protein	0	0	0	0.194795	0	0	0	0.0649317	N.A.	N.A.	N.A.	N.A.	0.136633	0	0.116144	0.403376	0.257565	0	0.084259	0.220314	N.A.	N.A.	N.A.	N.A.	N.A.	NO	NO	NO	NO	NO	NO	NO	489	489	0.442	0.442	0.442
AT1G02970	Q8L4H0	WEE1	ATWEE1, WEE1	WEE1-like kinase	1.07645	0.964221	0.743513	0.464262	0.500517	0.307752	0.928063	0.424177	DOWN	0.472	-1.084	0.02003	1.18139	1.08951	1.25782	1.21567	1.35589	1.33329	1.17624	1.30162	N.S.	1.013	0.019	0.85173	Non-Target	NO	NO	NO	NO	NO	NO	NO	1897	1897	0.409	0.409	0.409
AT1G02980	Q9SRZ0	CUL2	ATCUL2, CUL2	cullin 2	0.809415	1.61653	1.47007	2.26944	2.46009	2.19603	1.29867	2.30852	UP	2.987	1.579	9.4e-05	0.0981906	0.0541861	0.13047	0.207143	0.184665	0.235233	0.0942823	0.209013	N.A.	N.A.	N.A.	N.A.	N.A.	NO	NO	NO	NO	NO	NO	NO	2395, 2444	2444	0.421, 0.42	0.421	0.42
AT1G02990	A0A1P8AM24, F4HZ99, F4HZA0, Q8RXR8	AT1G02990		hypothetical protein	1.96639	1.81041	1.87407	1.66887	1.66543	1.59272	1.88362	1.64234	N.S.	0.818	-0.289	0.16702	0.516651	0.534179	0.820852	0.738584	1.17765	1.20735	0.623894	1.04119	1/1.5<=FC<=1.5	1.384	0.469	0.00038	Non-Target	NO	NO	NO	NO	3UTR	NO	NO	4379, 4387, 4426, 4499, 4602, 4752	4752	0.395, 0.393, 0.396, 0.399	0.399	0.397
AT1G03000	Q8RY16	PEX6	PEX6	peroxin 6	1.71431	1.77034	1.66594	1.5591	1.25179	1.14374	1.71686	1.31821	N.S.	0.708	-0.499	0.07153	1.23669	1.19903	1.64331	1.52361	1.69929	1.62912	1.35968	1.61734	N.S.	1.127	0.173	0.1362	Non-Target	NO	NO	NO	NO	NO	3UTR	NO	3295	3295	0.422	0.422	0.422
AT1G03010	A0A1P8AM10, A0A1P8AM39, Q9SA69	AT1G03010		Phototropic-responsive NPH3 family protein	1.43405	1.44812	1.42644	2.12195	1.54193	1.85073	1.43621	1.8382	UP	1.663	0.734	0.01463	0.814243	0.722822	0.639286	0.839985	0.722531	0.637967	0.72545	0.733495	DOWN	0.657	-0.607	3.4e-05	Non-Target	NO	NO	NO	NO	NO	NO	NO	2195, 2234, 2511	2511	0.402, 0.405, 0.404	0.405	0.404
AT1G03030	A0A1P8AMF1, Q500U9	AT1G03030		P-loop containing nucleoside triphosphate hydrolases superfamily protein	2.98064	2.7275	2.77334	2.66725	2.68685	2.71197	2.82716	2.68869	N.S.	0.927	-0.109	0.65298	2.80374	2.76892	2.80474	2.76656	2.65471	2.73702	2.79247	2.71943	1/1.5<=FC<=1.5	0.867	-0.205	6.9e-07	Non-Target	NO	NO	NO	NO	NO	NO	NO	1458, 1525	1525	0.421, 0.407	0.421	0.414
AT1G03040	A0A1P8ASS1, F4HZA7, Q93Y00	AT1G03040		basic helix-loop-helix (bHLH) DNA-binding superfamily protein	3.72882	3.63237	3.79287	4.15332	4.09435	3.99631	3.71802	4.08133	1/1.5<=FC<=1.5	1.498	0.583	0.00123	2.98955	3.02032	3.12778	3.06082	3.08562	3.06273	3.04588	3.06972	N.S.	1.007	0.011	0.8994	Non-Target	NO	NO	NO	3UTR	3UTR	3UTR	3' UTR	1440, 1573, 1639	1639	0.435, 0.432, 0.447	0.447	0.438
AT1G03050	Q9SA65	AT1G03050	PICALM5A	ENTH/ANTH/VHS superfamily protein	0.0956883	0	0	0.0349761	0.048614	0	0.0318961	0.0278634	N.A.	N.A.	N.A.	N.A.	N.E.	N.E.	N.E.	N.E.	N.E.	N.E.	N.E.	N.E.	N.E.	N.E.	N.E.	N.E.	N.A.	NO	NO	NO	NO	NO	NO	NO	2222	2222	0.427	0.427	0.427
AT1G03060	A0A178W7I4, A0A1P8AT16, A0A1P8AT19, F4HZB2	SPI	BCHA1, SPI	BEACH-DOMAIN HOMOLOG A1	1.45692	1.51403	1.59571	1.39645	1.43294	1.37163	1.52222	1.40034	N.S.	0.918	-0.123	0.60648	1.07727	1.07009	1.51858	1.50054	1.8755	2.09373	1.22198	1.82326	UP	1.753	0.81	4.9e-14	Non-Target	NO	NO	NO	NO	3UTR	NO	3' UTR	11304, 11483, 11892, 11983	11983	0.424, 0.427	0.427	0.426
AT1G03070	Q9SA63	AT1G03070	AtLFG4, LFG4	Bax inhibitor-1 family protein	3.18774	2.40842	2.10913	2.29407	2.56459	3.0502	2.56843	2.63629	N.S.	1.058	0.081	0.827	2.2733	2.19398	2.22712	2.32896	2.39816	2.34394	2.23147	2.35702	N.S.	0.933	-0.1	0.53171	Non-Target	NO	NO	NO	NO	NO	NO	NO	1132, 1165, 1248	1248	0.422, 0.421	0.422	0.422
AT1G03080	F4HZB5	NET1D	NET1D	kinase interacting (KIP1-like) family protein	3.26116	3.36573	3.58179	3.3063	3.29455	3.25286	3.40289	3.28457	N.S.	0.939	-0.091	0.72066	0.93148	0.835939	1.15235	1.1397	1.94557	1.87998	0.973256	1.65508	UP	1.635	0.709	1.8e-06	PERMISSIVE	NO	YES	NO	NO	NO	NO	NO	5860, 5954, 6005	6005	0.408, 0.406	0.408	0.407
AT1G03090	Q42523, Q42523-2	MCCA	MCCA	methylcrotonyl-CoA carboxylase alpha chain	3.02622	3.31375	3.64859	2.63063	2.88291	2.92671	3.32952	2.81342	DOWN	0.652	-0.617	0.03204	2.36984	2.30976	2.94257	3.01433	3.09335	2.9107	2.54072	3.00613	N.S.	0.901	-0.15	0.34412	PERMISSIVE	NO	YES	NO	NO	NO	3UTR	Stop codon	2547, 2741	2741	0.439	0.439	0.439
AT1G03100	Q9SA60	AT1G03100		Pentatricopeptide repeat (PPR) superfamily protein	0.357772	0.342015	0.510756	0.289926	0.294626	0.19612	0.403514	0.260224	N.A.	N.A.	N.A.	N.A.	0.866259	0.840512	0.96714	1.20041	1.11107	1.25089	0.891304	1.18746	1/1.5<=FC<=1.5	1.302	0.381	0.00035	Non-Target	NO	NO	NO	NO	NO	NO	NO	2595	2595	0.407	0.407	0.407
AT1G03106	Q8L760	AT1G03106		hypothetical protein	0.379922	0.57678	0.705078	0.0896469	0.421507	0.659014	0.553927	0.390056	N.S.	0.942	-0.087	0.74501	0.631451	0.577501	0.72736	1.01322	0.896804	0.738832	0.645437	0.882953	N.S.	1.053	0.075	0.67123	N.A.	NO	NO	NO	NO	NO	NO	NO	934	934	0.377	0.377	0.377
AT1G03110	Q93WD7	TRM82	AtTRM82, TRM82	Transducin/WD40 repeat-like superfamily protein	1.94682	1.76311	1.57418	1.43551	1.73972	1.6604	1.76137	1.61187	N.S.	0.918	-0.123	0.7021	3.18555	3.19694	3.23635	3.22816	3.25446	3.28317	3.20628	3.25526	N.S.	1.061	0.086	0.48844	Non-Target	NO	NO	NO	NO	NO	NO	NO	1577	1577	0.41	0.41	0.41
AT1G03120	A0A1P8ATY1, Q9SA57	RAB28	RAB28	responsive to abscisic acid 28	0.102114	0.680621	0	0.142374	0.355582	0	0.260912	0.165985	N.A.	N.A.	N.A.	N.A.	0.529658	0.449139	0.54634	0.340266	0.370241	0	0.508379	0.236836	N.S.	0.889	-0.17	0.33867	Non-Target	NO	NO	NO	NO	NO	NO	NO	629, 648	648	0.515, 0.503	0.515	0.509
AT1G03130	Q9SA56	PSAD-2	PSAD-2	photosystem I subunit D-2	1.21804	0.923685	1.35805	1.53782	1.52487	1.53661	1.16659	1.5331	N.S.	1.4	0.486	0.17118	1.49681	2.526	2.49938	3.03127	3.31058	2.90222	2.17406	3.08136	UP	1.643	0.716	1e-06	Non-Target	NO	NO	NO	NO	3UTR, CDS	5UTR, 3UTR, CDS	NO	956	956	0.427	0.427	0.427
AT1G03140	Q9SA55	AT1G03140	PRP18a	splicing factor Prp18 family protein	3.44541	3.33601	3.38456	3.3301	3.33568	3.41545	3.38866	3.36041	N.S.	1.032	0.045	0.84867	3.86643	3.91773	4.02336	3.96862	3.98288	3.88649	3.93584	3.946	1/1.5<=FC<=1.5	0.869	-0.202	1.3e-07	Non-Target	NO	NO	NO	NO	3UTR	NO	NO	1553	1553	0.453	0.453	0.453
AT1G03150	Q8LGI8	AT1G03150		Acyl-CoA N-acyltransferases (NAT) superfamily protein	4.05666	3.78755	3.85877	3.37424	3.49406	3.43144	3.90099	3.43325	1/1.5<=FC<=1.5	0.682	-0.553	0.00537	3.48986	3.36317	3.39243	3.15361	3.0378	2.84226	3.41515	3.01122	1/1.5<=FC<=1.5	0.779	-0.36	3.6e-05	N.A.	3UTR	NO	NO	NO	CDS	3UTR	NO	809	809	0.377	0.377	0.377
AT1G03160	A0A1P8AUL2, A0A1P8AUL4, Q1KPV0, Q1KPV0-2	FZL	FZL	FZO-like protein	0.964406	0.763457	0.593982	1.4288	0.8783	1.15816	0.773948	1.15509	UP	1.731	0.791	0.03322	0.915379	1.05729	1.1953	1.29369	1.56811	1.54295	1.05599	1.46825	1/1.5<=FC<=1.5	1.442	0.528	5.1e-10	Non-Target	NO	NO	NO	NO	CDS, 3UTR	NO	3' UTR	2806, 2905, 2940, 2948	2948	0.439, 0.441, 0.444	0.444	0.441
AT1G03165	A0A1P8AUJ0	AT1G03165		hypothetical protein	0.67114	0.755997	0.56431	0.857217	0.669553	0	0.663816	0.508923	N.S.	0.995	-0.008	0.96502	0.644294	0	0	0	0	0	0.214765	0	N.A.	N.A.	N.A.	N.A.	Non-Target	NO	NO	NO	NO	NO	NO	NO	228	228	0.39	0.39	0.39
AT1G03170	Q8GXU9	FAF2	FAF2, FTM5	FANTASTIC four-like protein (DUF3049)	0.0238093	0	0.0365257	0.0335934	0.0467051	0.0474855	0.0201117	0.0425947	N.A.	N.A.	N.A.	N.A.	0.0717158	0.0678624	0.0252427	0	0.075752	0.085426	0.0549403	0.053726	N.A.	N.A.	N.A.	N.A.	N.A.	NO	NO	NO	NO	NO	NO	NO	2309	2309	0.349	0.349	0.349
AT1G03180	A0A178W5X4, A0A178W7P5, A0A1P8AVN6, Q5Q0J2, Q5Q0J3, Q9ZVS0	AT1G03180		non-structural protein	1.99515	1.99912	1.9865	2.06929	2.4316	2.22407	1.99359	2.24165	N.S.	1.325	0.406	0.1524	1.81266	1.64065	1.77736	1.5081	1.64979	1.16998	1.74355	1.44263	N.S.	0.938	-0.092	0.4266	Non-Target	NO	NO	NO	NO	NO	NO	NO	1044, 1079, 1136, 1166, 1567, 1577	1577	0.392, 0.404, 0.391, 0.409, 0.411, 0.41	0.411	0.403
AT1G03190	Q8W4M7	UVH6	ATXPD, UVH6	RAD3-like DNA-binding helicase protein	2.01378	1.83123	1.94246	2.26633	2.5308	2.28623	1.92915	2.36112	UP	1.664	0.734	0.00136	1.71737	1.44884	1.59955	1.66291	1.96156	1.9133	1.58859	1.84592	1/1.5<=FC<=1.5	1.174	0.231	0.00287	Non-Target	NO	NO	NO	NO	NO	NO	NO	2595, 2676	2676	0.427, 0.422	0.427	0.424
AT1G03200	B6IDH7	AT1G03200		hypothetical protein	2.43159	2.89003	2.96169	2.43113	3.16866	3.20667	2.7611	2.93549	N.S.	1.164	0.219	0.51934	0.997898	0.417782	0.738203	1.13767	1.70778	0.718109	0.717961	1.18786	N.S.	1.274	0.349	0.08953	Non-Target	NO	NO	NO	NO	NO	NO	NO	436	436	0.362	0.362	0.362
AT1G03210	A0A1P8ARL5, Q9ZVS2	AT1G03210		Phenazine biosynthesis PhzC/PhzF protein	3.07699	2.44481	2.72566	2.28523	2.62139	2.6265	2.74916	2.51104	N.S.	0.856	-0.225	0.45236	3.87836	3.66894	3.60318	3.66821	3.46108	3.42432	3.71683	3.51787	1/1.5<=FC<=1.5	0.749	-0.417	3.7e-10	Non-Target	NO	NO	NO	NO	NO	NO	NO	1011, 1095	1095	0.422, 0.418	0.422	0.42
AT1G03220	Q9ZVS4	AT1G03220		Eukaryotic aspartyl protease family protein	6.11018	6.19072	6.43515	5.53979	6.10412	6.14207	6.24535	5.92866	N.S.	0.837	-0.257	0.36184	6.42031	6.58608	6.69487	6.94692	7.01557	7.09814	6.56708	7.02021	N.S.	1.093	0.128	0.17403	Non-Target	NO	NO	NO	NO	NO	NO	NO	1891	1891	0.436	0.436	0.436
AT1G03230	A0A178WJ14, Q9ZVS5	AT1G03230		Eukaryotic aspartyl protease family protein	3.78654	3.49361	3.2228	3.24935	3.4742	3.4908	3.50098	3.40478	N.S.	0.965	-0.052	0.8579	4.51291	4.58269	4.46155	4.80804	5.07048	5.20443	4.51905	5.02765	N.S.	1.243	0.314	0.08231	Non-Target	NO	NO	NO	NO	NO	NO	NO	1870	1870	0.439	0.439	0.439
AT1G03240	F4I0U4	AT1G03240		hypothetical protein	1.21658	1.83149	1.76588	1.71502	2.31531	1.9739	1.60465	2.00141	N.S.	1.336	0.418	0.24169	0.108355	0	0.187918	0	0	0	0.0987577	0	N.A.	N.A.	N.A.	N.A.	N.A.	NO	NO	NO	NO	NO	NO	NO	547	547	0.327	0.327	0.327
AT1G03250	A0A1P8AQQ6, A0A1P8AQZ8, F4I0U6, Q8L3X7	AT1G03250		R3H domain protein	3.34133	3.13394	3.22087	2.81923	3.03586	3.02348	3.23205	2.95952	N.S.	0.828	-0.272	0.22768	3.24827	3.12488	3.22174	3.21026	3.09498	2.87982	3.1983	3.06169	1/1.5<=FC<=1.5	0.884	-0.178	0.00084	PERMISSIVE	NO	YES	NO	3UTR	3UTR	3UTR	NO	1041, 1190, 1242, 1310	1310	0.409, 0.419, 0.42, 0.429	0.429	0.419
AT1G03260	Q6NMJ6	AT1G03260		SNARE associated Golgi protein family	3.16838	2.84877	2.71045	2.57537	2.46462	2.44554	2.9092	2.49518	1/1.5<=FC<=1.5	0.712	-0.49	0.0374	2.20199	2.07646	2.35797	2.1364	2.24484	2.20344	2.21214	2.1949	N.S.	0.925	-0.112	0.0529	PERMISSIVE	NO	YES	NO	NO	NO	NO	NO	1443	1443	0.439	0.439	0.439
AT1G03270	Q9ZVS8	AT1G03270		CBS domain protein with a domain protein (DUF21)	0.393873	0	0.139051	0.242056	0.277109	0.281229	0.177641	0.266798	N.A.	N.A.	N.A.	N.A.	0.810195	0.599878	0.859496	0.603324	0.925709	0.843472	0.756523	0.790835	N.S.	1.05	0.071	0.57096	Non-Target	NO	NO	NO	NO	NO	NO	NO	1765	1765	0.427	0.427	0.427
AT1G03280	A0A178W4Q8, Q93ZW3	AT1G03280		Transcription factor TFIIE, alpha subunit	2.92688	2.81465	2.94091	2.65146	2.70691	2.72466	2.89415	2.69434	N.S.	0.877	-0.19	0.38481	2.5391	2.58036	2.76647	2.77472	2.86839	2.62088	2.62864	2.75466	1/1.5<=FC<=1.5	1.091	0.125	0.0325	Non-Target	NO	NO	NO	NO	3UTR	3UTR	Stop codon	1948, 1966, 2312	2312	0.415, 0.41, 0.417	0.417	0.414
AT1G03290	A0A1P8AT68, A0A1P8AT82, Q9ZVT0	AT1G03290		ELKS/Rab6-interacting/CAST family protein	2.90347	2.82513	2.88424	2.42257	2.60206	2.83127	2.87094	2.61863	N.S.	0.854	-0.228	0.36123	2.42617	2.35387	2.48367	2.61963	2.44779	2.20568	2.42123	2.42437	N.S.	0.995	-0.007	0.95523	Non-Target	NO	NO	NO	3UTR	3UTR	3UTR	NO	1992, 2058, 2503, 4386, 4443, 4542	4542	0.406, 0.383, 0.409, 0.392, 0.394	0.409	0.399
AT1G03310	Q8L735	DBE1	AtBE2, ATISA2, BE2, DBE1, ISA2	debranching enzyme 1	0.785491	0.544378	0.440424	0.460362	0.330319	0.335133	0.590098	0.375271	N.S.	0.762	-0.392	0.27194	1.14554	1.2772	1.59598	1.50975	1.62151	1.6285	1.33957	1.58659	N.S.	1.009	0.013	0.88846	Non-Target	NO	NO	NO	NO	CDS	NO	NO	3053, 3076	3076	0.41	0.41	0.41
AT1G03320	Q9ZVT3	AT1G03320		hypothetical protein	0	0	0	0	0.170505	0	0	0.0568348	N.A.	N.A.	N.A.	N.A.	0.134924	0	0	0	0	0	0.0449747	0	N.A.	N.A.	N.A.	N.A.	Non-Target	NO	NO	NO	NO	NO	NO	NO	701	701	0.445	0.445	0.445
AT1G03330	Q1H595	2	2	Small nuclear ribonucleoprotein family protein	3.83498	3.64953	3.66059	3.34142	3.3523	3.53227	3.71503	3.40866	N.S.	0.805	-0.313	0.152	4.68519	4.58678	4.43745	4.06392	4.04607	3.82625	4.56981	3.97875	DOWN	0.586	-0.77	< 2e-16	STRINGENT	3UTR	YES	YES	NO	3UTR	3UTR	Stop codon	775	775	0.372	0.372	0.372
AT1G03340	Q9ZVT5	AT1G03340		hypothetical protein	0.0375578	0	0	0.0528751	0.0732068	0.0744078	0.0125193	0.0668299	N.A.	N.A.	N.A.	N.A.	0.917082	0.726157	0.75136	1.13767	0.928717	0.707269	0.7982	0.924553	1/1.5<=FC<=1.5	1.292	0.37	0.00181	Non-Target	NO	NO	NO	NO	NO	NO	NO	1507	1507	0.403	0.403	0.403
AT1G03350	Q9ZVT6	AT1G03350		BSD domain-containing protein	3.74036	3.43693	3.48777	3.8644	3.84129	3.82568	3.55502	3.84379	1/1.5<=FC<=1.5	1.392	0.477	0.00575	3.82361	3.89756	3.87725	4.18764	4.17391	4.19771	3.86614	4.18642	N.S.	1.03	0.042	0.64941	Non-Target	NO	NO	NO	NO	NO	NO	NO	1829	1829	0.423	0.423	0.423
AT1G03360	Q9ZVT7	RRP4	ATRRP4, RRP4, SOP2	ribosomal RNA processing 4	1.34203	0.715857	0.996403	1.21843	1.04412	0.727452	1.0181	0.996667	N.S.	1.005	0.008	0.98526	2.8566	2.8973	2.92663	2.90266	2.90306	2.88357	2.89351	2.89643	N.S.	1.015	0.022	0.8637	PERMISSIVE	NO	YES	YES	NO	NO	NO	NO	1325	1325	0.434	0.434	0.434
AT1G03365	A0A178WF87, Q9ZVT8	AT1G03365		RING/U-box superfamily protein	2.11092	2.02832	2.25752	2.22642	2.1528	2.15692	2.13225	2.17871	N.S.	1.096	0.132	0.60243	1.7383	1.78098	1.75822	1.86865	1.77507	1.91061	1.75917	1.85144	N.S.	1.071	0.099	0.11633	Non-Target	NO	NO	NO	NO	NO	NO	NO	2892, 3277	3277	0.415, 0.404	0.415	0.41
AT1G03370	A0A1P8AUR4, Q9ZVT9	AT1G03370		C2 calcium/lipid-binding and GRAM domain containing protein	2.93375	2.89944	2.96626	2.50677	2.70458	2.6886	2.93315	2.63332	N.S.	0.799	-0.324	0.11321	2.27682	2.25878	2.59545	2.52689	2.62956	2.73749	2.37702	2.63131	N.S.	1.028	0.04	0.58049	Non-Target	NO	NO	NO	NO	NO	NO	NO	3896, 4193	4193	0.421, 0.414	0.421	0.418
AT1G03380	Q8GUL1	ATG18G	ATATG18G, ATG18G	yeast autophagy 18 G-like protein	2.23747	2.14882	2.37761	2.00973	2.08535	1.99966	2.25464	2.03158	N.S.	0.846	-0.242	0.28922	2.25082	2.20295	2.61576	2.64043	2.85704	2.81496	2.35651	2.77081	N.S.	1.127	0.172	0.06166	Non-Target	NO	NO	NO	3UTR	3UTR	NO	3' UTR	4183	4183	0.426	0.426	0.426
AT1G03390	Q9LR83	AT1G03390		HXXXD-type acyl-transferase family protein	0.080657	0.0948337	0.0631785	0	0	0	0.0795564	0	N.A.	N.A.	N.A.	N.A.	0	0.121017	0.0231695	0	0	0.150853	0.0480621	0.0502844	N.A.	N.A.	N.A.	N.A.	N.A.	NO	NO	NO	NO	NO	NO	NO	1386	1386	0.429	0.429	0.429
AT1G03400	A0A1P8AQW5, Q94A78	AT1G03400		2-oxoglutarate (2OG) and Fe(II)-dependent oxygenase superfamily protein	0.222178	0	0	0.0579339	0	0.15673	0.0740594	0.0715547	N.A.	N.A.	N.A.	N.A.	0.503135	0.512555	0.697543	0.614696	0.992879	0.596007	0.571077	0.734527	N.S.	0.927	-0.11	0.53025	Non-Target	NO	NO	NO	3UTR	NO	NO	NO	1385, 1402	1402	0.445, 0.444	0.445	0.444
AT1G03410	A0A178WBQ3, Q43383	2A6	2A6	2-oxoglutarate (2OG) and Fe(II)-dependent oxygenase superfamily protein	2.21898	2.02991	1.92784	2.18965	1.86377	1.94636	2.05891	1.99993	N.S.	1.004	0.006	0.98475	1.46124	1.30275	1.30682	2.23141	2.0507	2.0999	1.35694	2.12734	N.S.	1.077	0.107	0.47072	Non-Target	NO	NO	NO	3UTR	NO	NO	NO	1432, 2652	2652	0.448, 0.441	0.448	0.444
AT1G03430	A0A1P8AWM0, Q682K6, Q8L9T7	AHP5	AHP5	histidine-containing phosphotransfer factor 5	2.1138	1.8684	1.90898	1.69261	1.59393	1.83331	1.96373	1.70662	N.S.	0.835	-0.26	0.38072	2.12443	2.19376	2.15716	2.27879	2.29606	2.34062	2.15845	2.30516	N.S.	0.935	-0.096	0.24971	Non-Target	NO	NO	NO	NO	NO	NO	NO	1226, 1334	1334	0.379, 0.377	0.379	0.378
AT1G03440	F4I0W7, Q9LR79	AT1G03440		Leucine-rich repeat (LRR) family protein	0.485544	0.442063	0.654929	0.907124	0.63051	0.638477	0.527512	0.72537	N.S.	1.3	0.379	0.28566	1.12657	1.08807	1.22467	1.46721	1.47439	1.66057	1.14644	1.53406	1/1.5<=FC<=1.5	1.135	0.183	0.04839	Non-Target	NO	NO	NO	NO	NO	NO	NO	2147	2147	0.421	0.421	0.421
AT1G03445	A0A1P8AQ82, Q9LR78	BSU1	BSU1	Serine/threonine protein phosphatase family protein	0.435217	0.484276	0.247258	0.295326	0.077099	0.341895	0.388917	0.238107	N.A.	N.A.	N.A.	N.A.	0.105198	0.11018	0.0911141	0.0852002	0	0.0776238	0.102164	0.0542746	N.A.	N.A.	N.A.	N.A.	N.A.	NO	NO	NO	NO	NO	NO	NO	2523, 2727	2727	0.428, 0.435	0.435	0.432
AT1G03457	A0A178WA59, A0A178WAT1, Q8GZ26	AT1G03457	AtBRN2, BRN2	RNA-binding (RRM/RBD/RNP motifs) family protein	3.23041	3.19504	3.20543	2.7372	2.84049	2.84816	3.21029	2.80862	1/1.5<=FC<=1.5	0.722	-0.47	0.01523	2.1796	1.83198	2.37238	2.07006	2.0265	2.1264	2.12799	2.07432	1/1.5<=FC<=1.5	0.729	-0.456	9.3e-06	Non-Target	NO	NO	NO	3UTR	NO	NO	NO	1549, 1990, 2017	2017	0.413, 0.409, 0.408	0.413	0.41
AT1G03470	Q66GR8	NET3A	NET3A	Kinase interacting (KIP1-like) family protein	0.883252	0.909712	0.786436	0.636344	1.00172	0.76335	0.8598	0.80047	N.S.	0.992	-0.012	0.97424	0.976905	0.896728	1.09747	0.740868	0.90575	0.835056	0.990368	0.827225	N.S.	1.035	0.05	0.7518	Non-Target	NO	NO	NO	NO	NO	NO	NO	1226, 1247, 1359	1359	0.39, 0.387, 0.395, 0.396	0.396	0.392
AT1G03475	Q9LR75	LIN2	ATCPO-I, HEMF1, LIN2	Coproporphyrinogen III oxidase	2.8051	2.55791	2.62869	2.61585	2.57311	2.50092	2.6639	2.56329	N.S.	0.961	-0.058	0.82358	3.0565	3.11254	3.31689	3.2445	3.40618	3.42145	3.16198	3.35738	N.S.	1.029	0.041	0.53382	Non-Target	NO	NO	NO	NO	3UTR	3UTR, CDS	3' UTR	1743	1743	0.435	0.435	0.435
AT1G03490	Q9LR74	NAC006	ANAC006, NAC006	NAC domain containing protein 6	0	0	0	0.191579	0	0	0	0.0638595	N.A.	N.A.	N.A.	N.A.	0	0	0	0.0612804	0	0.273837	0	0.111706	N.A.	N.A.	N.A.	N.A.	N.A.	NO	NO	NO	NO	NO	NO	NO	846	846	0.452	0.452	0.452
AT1G03495	A0A2H1ZEA8, Q56XS0	AT1G03495		HXXXD-type acyl-transferase family protein	0.0437288	0	0.066878	0	0.0850661	0.0863786	0.0368689	0.0571482	N.A.	N.A.	N.A.	N.A.	0.882129	1.01305	1.27088	1.25475	1.27773	1.20176	1.05536	1.24475	N.S.	0.991	-0.014	0.9236	Non-Target	NO	NO	NO	NO	NO	NO	NO	1311	1311	0.443	0.443	0.443
AT1G03510	Q9LR72	AT1G03510		Tetratricopeptide repeat (TPR)-like superfamily protein	0.27362	0.0891055	0.114821	0.329813	0.0751752	0	0.159182	0.134996	N.A.	N.A.	N.A.	N.A.	0.675417	0.808133	0.705054	0.821754	0.778041	0.722759	0.729535	0.774185	N.S.	0.987	-0.018	0.89961	Non-Target	NO	NO	NO	NO	NO	NO	NO	1470	1470	0.416	0.416	0.416
AT1G03520	A8MQE8, Q9LR71	AT1G03520		Core-2/I-branching beta-1,6-N-acetylglucosaminyltransferase family protein	2.66181	2.30943	2.51781	2.24262	2.62024	2.32159	2.49635	2.39482	N.S.	0.968	-0.047	0.87845	1.54051	1.16336	1.56051	1.58481	1.62554	1.48474	1.42146	1.56503	N.S.	0.989	-0.015	0.87256	Non-Target	NO	NO	NO	NO	NO	NO	NO	1404, 2137	2137	0.401, 0.415	0.415	0.408
AT1G03530	Q9LR70	NAF1	ATNAF1, NAF1	nuclear assembly factor 1	0.549642	0.457139	0.319837	0.40942	0.201836	0.1412	0.442206	0.250819	N.A.	N.A.	N.A.	N.A.	2.17464	2.30059	2.4783	2.47836	2.73695	2.96103	2.31784	2.72544	1/1.5<=FC<=1.5	1.419	0.505	0.00024	Non-Target	NO	NO	NO	NO	NO	NO	NO	2921	2921	0.452	0.452	0.452
AT1G03540	Q9LR69	AT1G03540		Pentatricopeptide repeat (PPR-like) superfamily protein	0.342981	0.347663	0.433403	0.432725	0.298595	0.500062	0.374682	0.410461	N.A.	N.A.	N.A.	N.A.	0.425827	0.244024	0.397093	0.492607	0.469847	0.839428	0.355648	0.600627	1/1.5<=FC<=1.5	1.335	0.417	0.01083	Non-Target	NO	NO	NO	NO	NO	NO	NO	1929	1929	0.452	0.452	0.452
AT1G03550	A0A1P8AMF6, A0A1P8AMG2, A0A1P8AMG5, A0A1P8AMH4, A0A1P8AMJ6, A0A1P8AMJ9, Q9LR68	SCAMP4	AtSCAMP4, SCAMP4	Secretory carrier membrane protein (SCAMP) family protein	3.55717	3.56743	3.4223	2.93398	2.88559	3.18743	3.51563	3.00234	DOWN	0.66	-0.6	0.00648	2.40389	2.06367	2.27129	2.10775	2.12173	1.86301	2.24629	2.03083	1/1.5<=FC<=1.5	0.863	-0.213	0.04172	Non-Target	NO	NO	NO	NO	NO	NO	NO	609, 654, 747, 807, 903, 1258	1258	0.422, 0.429, 0.421, 0.44, 0.443, 0.445, 0.432	0.445	0.433
AT1G03560	Q9LR67	AT1G03560		Pentatricopeptide repeat (PPR-like) superfamily protein	1.01504	0.947503	0.857892	1.04877	0.842024	0.788325	0.940147	0.893039	N.S.	1.003	0.004	0.99291	1.13024	0.952543	1.15692	1.33501	1.42688	1.18973	1.0799	1.31721	1/1.5<=FC<=1.5	1.38	0.465	1.5e-06	Non-Target	NO	NO	NO	NO	NO	NO	NO	2338	2338	0.409	0.409	0.409
AT1G03590	Q9LR65	AT1G03590		Protein phosphatase 2C family protein	4.04371	3.98697	4.03785	3.7485	3.93625	3.77556	4.02285	3.8201	N.S.	0.883	-0.18	0.3768	2.71232	2.72195	2.93963	2.97617	2.94344	2.83208	2.7913	2.91723	N.S.	0.989	-0.016	0.83083	Non-Target	NO	NO	NO	NO	NO	NO	NO	2219	2219	0.405	0.405	0.405
AT1G03600	Q9LR64	PSB27	PSB27	photosystem II family protein	0.748415	0.817929	0.70996	1.18657	1.38778	1.09127	0.758768	1.22187	UP	1.869	0.902	0.02932	1.83379	2.50042	2.51129	2.88672	3.08485	2.80181	2.28183	2.92446	N.S.	1.08	0.112	0.41561	N.A.	3UTR	NO	NO	3UTR	3UTR	3UTR, CDS	NO	1315	1315	0.412	0.412	0.412
AT1G03610	A0A1P8AV44, Q8LF98	AT1G03610		plant/protein (DUF789)	2.76921	2.80041	2.84258	2.56464	2.72724	2.70781	2.80407	2.66657	N.S.	0.933	-0.099	0.69463	2.09109	2.28081	2.51862	2.35966	2.29019	2.29521	2.29684	2.31502	1/1.5<=FC<=1.5	0.816	-0.293	0.0432	Non-Target	NO	NO	NO	StopCodon, 3UTR	3UTR	NO	NO	1897, 1974	1974	0.399, 0.397	0.399	0.398
AT1G03620	A0A1P8APK4, A0A1P8APM3, A2RVK8	AT1G03620		ELMO/CED-12 family protein	0.045089	0	0	0	0.0875877	0.0890095	0.0150297	0.0588657	N.A.	N.A.	N.A.	N.A.	0.0948992	0	0	0.0273155	0.0757455	0.138438	0.0316331	0.0804995	N.A.	N.A.	N.A.	N.A.	Non-Target	NO	NO	NO	NO	NO	NO	NO	1275, 1312, 1339, 1378, 1382, 1387, 1494, 1585, 1743, 1764, 1796, 1922	1922	0.378, 0.364, 0.375, 0.372, 0.403, 0.385, 0.407, 0.404, 0.408, 0.377, 0.406	0.408	0.389
AT1G03630	F4I2F8, O48741	POR C	POR C, PORC	protochlorophyllide oxidoreductase C	0.081096	0	0	0.113214	0.0611017	0	0.027032	0.0581051	N.A.	N.A.	N.A.	N.A.	0.445314	0.740057	0.766784	0.777606	1.0441	0.731646	0.650718	0.851119	N.S.	0.916	-0.126	0.44371	N.A.	CDS,CDS	NO	NO	3UTR	3UTR	3UTR	Stop codon	1379, 1787	1787	0.435, 0.436	0.436	0.436
AT1G03650	Q8GWN1	AT1G03650		Acyl-CoA N-acyltransferases (NAT) superfamily protein	0.569301	0.909425	0.500258	0.827634	0.129646	0.754247	0.659661	0.570509	N.S.	0.993	-0.01	0.97424	2.27907	1.95019	2.24321	2.22487	1.91494	1.50436	2.15749	1.88139	1/1.5<=FC<=1.5	0.801	-0.321	0.00318	Non-Target	NO	NO	NO	3UTR	NO	NO	NO	892	892	0.422	0.422	0.422
AT1G03660	A0A178WME8, F4I2G0, Q9LR60	AT1G03660		Ankyrin-repeat containing protein	0.495847	0.449978	0.558368	1.40595	1.01243	1.55291	0.501398	1.32376	UP	3.536	1.822	0.00348	1.59606	1.52078	1.67673	1.72594	1.7732	1.80681	1.59786	1.76865	N.S.	0.908	-0.139	0.22295	Non-Target	NO	NO	NO	NO	NO	NO	NO	794, 1019	1019	0.382, 0.377	0.382	0.38
AT1G03670	A0A178WD46	AT1G03670		ankyrin repeat family protein	0	0.135318	0	0	0	0	0.0451061	0	N.A.	N.A.	N.A.	N.A.	0.0377128	0.0867702	0.0324788	0.0668181	0.0780789	0	0.0523206	0.048299	N.A.	N.A.	N.A.	N.A.	N.A.	NO	NO	NO	NO	NO	NO	NO	1851	1851	0.413	0.413	0.413
AT1G03680	O48737	THM1	ATHM1, ATM1, THM1, TRX-M1	thioredoxin M-type 1	2.248	1.95541	2.02366	1.94797	1.57291	2.02875	2.07569	1.84988	N.S.	0.883	-0.179	0.57612	2.69044	2.97048	3.04345	2.90557	3.22231	3.03583	2.90146	3.05457	N.S.	0.907	-0.141	0.0852	N.A.	3UTR	NO	NO	NO	3UTR	3UTR, CDS	Stop codon	957	957	0.424	0.424	0.424
AT1G03687	A2RVL4, F4I2G3, F4I2G4	AT1G03687		DTW domain-containing protein	1.85807	1.75909	1.77882	1.7211	1.73325	1.98295	1.79866	1.81244	N.S.	1.066	0.092	0.77335	2.70371	2.62127	2.75269	2.68618	2.58086	2.50161	2.69256	2.58955	1/1.5<=FC<=1.5	0.89	-0.169	0.00245	PERMISSIVE	NO	YES	YES	3UTR	NO	NO	NO	1428, 1455	1455	0.447, 0.454	0.454	0.45
AT1G03700	Q9LR57	AT1G03700	CASPL1C2	Uncharacterized protein family (UPF0497)	0.423187	0.537087	0.876358	0.356148	0.468534	0.375525	0.612211	0.400069	N.S.	0.898	-0.155	0.57014	3.61677	3.93023	3.83094	3.26201	3.19506	3.38367	3.79265	3.28025	DOWN	0.515	-0.957	6e-05	Non-Target	NO	NO	NO	NO	NO	NO	NO	837	837	0.378	0.378	0.378
AT1G03730	Q1ECK0, Q9LR54	AT1G03730		pyrroline-5-carboxylate reductase	3.08147	3.22519	3.42989	3.36676	3.62108	3.42756	3.24551	3.4718	N.S.	1.269	0.344	0.17877	2.89515	3.02136	3.00175	3.05174	2.98401	3.04286	2.97275	3.0262	1/1.5<=FC<=1.5	0.911	-0.134	0.03018	Non-Target	NO	NO	NO	NO	NO	NO	NO	1271	1271	0.384	0.384	0.384
AT1G03740	F4I2H1, Q9LR53	AT1G03740		Protein kinase superfamily protein	2.8927	2.99763	3.15523	3.137	3.09817	3.23628	3.01518	3.15715	N.S.	1.189	0.25	0.2816	2.2999	2.24702	2.67802	2.63254	2.81954	2.85071	2.40831	2.7676	1/1.5<=FC<=1.5	1.191	0.253	0.00012	PERMISSIVE	NO	YES	NO	NO	NO	3UTR	NO	3085, 3294	3294	0.404, 0.412	0.412	0.408
AT1G03750	F4I2H2	SWI2	CHR9	switch 2	1.37924	1.29545	1.6168	1.42881	1.52811	1.25013	1.4305	1.40235	N.S.	1.014	0.021	0.95422	0.706389	0.813436	0.918741	0.943482	1.23311	0.904591	0.812855	1.02706	1/1.5<=FC<=1.5	1.165	0.22	0.04594	Non-Target	NO	NO	NO	NO	NO	NO	NO	2777	2777	0.418	0.418	0.418
AT1G03760	Q8GWP1, Q9ZW98	AT1G03760		Prefoldin chaperone subunit family protein	1.38421	1.53694	1.56405	1.65729	1.838	1.9599	1.49507	1.8184	N.S.	1.43	0.516	0.09899	1.7044	1.74964	1.74547	1.72039	1.8874	1.74727	1.73317	1.78502	N.S.	1.064	0.09	0.41789	Non-Target	NO	NO	NO	3UTR	NO	NO	NO	1382	1382	0.429	0.429	0.429
AT1G03770	A0A178WM67, A0A1P8AWT6, A0A1P8AWX4, F4I2H4, Q0WX00	RING1B	ATRING1B, RING1B	RING 1B	1.82129	1.56623	1.87874	2.0935	1.83464	1.95161	1.75542	1.95992	N.S.	1.268	0.343	0.21418	1.14766	0.93846	0.995249	0.812934	1.03479	0.795	1.02712	0.880909	N.S.	1.036	0.051	0.75218	Non-Target	NO	NO	NO	NO	NO	NO	NO	1473, 1659, 1751, 1815, 1976, 2054	2054	0.426, 0.407, 0.415, 0.408, 0.41, 0.396	0.426	0.41
AT1G03780	A0A178WE47, F4I2H7, F4I2H7-2, F4I2H7-3	TPX2	AtTPX2, TPX2	targeting protein for XKLP2	0.380214	0.146114	0	0.030634	0.153847	0.0413377	0.175443	0.075273	N.A.	N.A.	N.A.	N.A.	0.970487	0.836501	1.20391	0.962109	1.26798	1.43874	1.00363	1.22294	N.S.	1.1	0.137	0.1902	Non-Target	NO	NO	NO	NO	NO	NO	NO	2504, 2539, 2660	2660	0.427, 0.426, 0.428	0.428	0.427
AT1G03790	Q9ZWA1	SOM	AtTZF4, SOM, TZF4	Zinc finger C-x8-C-x5-C-x3-H type family protein	1.09251	2.36891	2.52141	2.65546	3.87894	2.85818	1.99427	3.13086	N.S.	1.389	0.474	0.12656	0.252715	0.372998	0.233825	0.796473	0.899369	0.589388	0.286513	0.761743	UP	1.643	0.716	0.01383	N.A.	NO	NO	NO	NO	NO	NO	NO	1855	1855	0.43	0.43	0.43
AT1G03800	Q9ZWA2	ERF10	ATERF10, ERF10	ERF domain protein 10	0.278712	0.434119	0.450113	1.22708	1.21477	0.606572	0.387648	1.01614	UP	3.165	1.662	0.0064	0.352975	0.432103	0.309618	1.03054	0.511429	0.43156	0.364898	0.657842	1/1.5<=FC<=1.5	1.391	0.476	0.0081	Non-Target	NO	NO	NO	NO	NO	NO	NO	1280	1280	0.441	0.441	0.441
AT1G03820	Q9ZWA4	AT1G03820		E6-like protein	1.44383	1.47938	1.2892	2.06121	1.74739	1.41247	1.40414	1.74036	N.S.	1.465	0.551	0.11268	2.00075	2.02093	1.98833	1.69762	1.4136	1.43008	2.00334	1.51377	N.S.	0.937	-0.093	0.55783	Non-Target	NO	NO	NO	NO	NO	NO	NO	1127	1127	0.374	0.374	0.374
AT1G03830	A0A178WGP9, Q8GXF4, Q9ZWA5	AT1G03830		guanylate-binding family protein	0.922665	0.59416	0.697451	0.844601	1.0397	0.867714	0.738092	0.917337	N.S.	1.291	0.369	0.24991	0.989772	0.907809	1.16756	1.21201	1.41192	1.47852	1.02171	1.36748	UP	1.566	0.647	2.2e-12	Non-Target	NO	NO	NO	NO	NO	NO	NO	3153, 3654	3654	0.425, 0.437	0.437	0.431
AT1G03840	Q9ZWA6, Q9ZWA6-2	MGP	IDD3, MGP	C2H2 and C2HC zinc fingers superfamily protein	1.40583	1.27325	1.25029	2.76292	2.33314	2.08477	1.30979	2.39361	UP	3.854	1.946	1.6e-09	2.42148	2.26747	2.27338	2.41199	2.32084	2.47557	2.32078	2.4028	N.S.	1.081	0.113	0.27858	Non-Target	NO	NO	NO	NO	NO	NO	NO	1590, 1923	1923	0.422, 0.449	0.449	0.436
AT1G03850	A0A178WH08, A0A1P8AQF1, Q84TF4, Q84TF4-2	GRXS13	ATGRXS13, GRXS13, ROXY18	Glutaredoxin family protein	3.80207	4.30756	5.13291	3.9142	4.83854	4.82303	4.41418	4.52526	N.S.	1.025	0.036	0.91964	4.47693	4.65399	4.6176	4.6964	4.45053	4.50919	4.58284	4.55204	N.S.	0.935	-0.097	0.37039	Non-Target	NO	NO	NO	NO	NO	NO	NO	752, 1104, 1175	1175	0.389, 0.391, 0.382	0.391	0.387
AT1G03860	Q9ZNT7, Q9ZNT7-2	PHB2	ATPHB2, PHB2	prohibitin 2	4.60849	4.33821	4.37576	3.74271	4.04517	4.14852	4.44082	3.9788	1/1.5<=FC<=1.5	0.707	-0.501	0.02298	4.84282	4.81231	4.89454	4.5032	4.46702	4.63989	4.84989	4.5367	1/1.5<=FC<=1.5	0.725	-0.463	3.9e-07	STRINGENT	3UTR,3UTR,3UTR	YES	YES	NO	3UTR	3UTR	3' UTR	1355, 1398, 1400	1400	0.432, 0.433, 0.431	0.433	0.432
AT1G03870	Q9ZWA8	FLA9	FLA9	FASCICLIN-like arabinoogalactan 9	6.22806	5.89106	5.68385	6.30603	5.93456	6.11065	5.93432	6.11708	N.S.	1.23	0.298	0.20183	6.20454	6.32289	6.27671	6.37895	6.37032	6.45957	6.26805	6.40295	N.S.	0.936	-0.095	0.60186	Non-Target	NO	NO	NO	NO	NO	NO	NO	1164	1164	0.425	0.425	0.425
AT1G03880	P15456	CRU2	CRB, CRU2	cruciferin 2	0	0	0.102831	0	0.0672146	0	0.034277	0.0224049	N.A.	N.A.	N.A.	N.A.	0.105811	0.155588	0.0189817	1.32224	5.58883	1.18389	0.0934604	2.69832	UP	516.32	9.012	2.2e-05	N.A.	NO	NO	NO	NO	NO	NO	NO	1633	1633	0.486	0.486	0.486
AT1G03890	Q9ZWA9	AT1G03890		RmlC-like cupins superfamily protein	0.0372091	0	0	0	0	0	0.012403	0	N.A.	N.A.	N.A.	N.A.	0	0	0	0.110222	2.97919	0.255254	0	1.11489	N.S.	1.017	0.024	0.25502	N.A.	NO	NO	NO	NO	NO	NO	NO	1520	1520	0.478	0.478	0.478
AT1G03900	Q681Q7	ABCI18	ABCI18, ATNAP4, NAP4	non-intrinsic ABC protein 4	5.0107	4.90342	4.81489	4.74608	4.83322	4.80229	4.90967	4.79386	N.S.	0.954	-0.068	0.73773	5.36926	5.34034	5.39173	5.41607	5.31301	5.31373	5.36711	5.34761	1/1.5<=FC<=1.5	0.848	-0.238	1.2e-08	STRINGENT	3UTR	YES	YES	NO	3UTR	3UTR	NO	1239	1239	0.449	0.449	0.449
AT1G03905	A0A1P8AX17, Q3EDJ0	ABCI19	ABCI19, ATNAP4	P-loop containing nucleoside triphosphate hydrolases superfamily protein	2.70161	2.57766	2.78314	2.93459	3.07136	2.88684	2.68747	2.96426	1/1.5<=FC<=1.5	1.366	0.45	0.04506	3.12246	2.97785	3.07366	2.90832	2.91945	2.82672	3.05799	2.88483	N.S.	0.962	-0.056	0.49928	Non-Target	NO	NO	NO	NO	NO	NO	NO	1346, 1574, 1592, 1666	1666	0.419, 0.415, 0.423, 0.418	0.423	0.419
AT1G03910	A0A178WHR8, F4I2J8, F4I2J8-2	AT1G03910	CTN	cactus-binding carboxy-terminal, cactin	3.31454	3.27948	3.47597	3.38607	3.60165	3.47274	3.35666	3.48682	N.S.	1.185	0.245	0.27303	2.45882	2.4351	2.68821	2.59397	2.90044	3.12626	2.52738	2.87355	1/1.5<=FC<=1.5	1.13	0.176	0.01952	PERMISSIVE	NO	YES	YES	NO	3UTR	3UTR	Stop codon	2466, 2565	2565	0.445, 0.447	0.447	0.446
AT1G03920	A0A178WFU6, A0A1P8AWP3, F4I2K0	AT1G03920		Protein kinase family protein	2.49116	2.31144	2.64847	3.16364	3.03875	3.29533	2.48369	3.1659	UP	2.093	1.066	3e-06	0.705766	0.503997	1.01227	0.784214	0.906783	0.791421	0.740679	0.827473	N.S.	1.234	0.303	0.0525	Non-Target	NO	NO	NO	NO	NO	NO	NO	2103, 2164, 2237	2237	0.401, 0.396, 0.394	0.401	0.397
AT1G03930	Q9ZWB3	ADK1	ADK1, CKL9ALPHA, CKL9BETA	dual specificity kinase 1	2.31152	2.28365	2.08933	2.22895	1.85857	1.71265	2.22817	1.93339	N.S.	0.827	-0.275	0.32223	1.93697	1.8087	2.0925	2.15281	1.97575	1.95905	1.94606	2.02921	N.S.	1.014	0.019	0.8396	Non-Target	NO	NO	NO	NO	NO	NO	Stop codon	2419	2419	0.407	0.407	0.407
AT1G03940	A0A178WB40, Q9ZWB4	AT1G03940		HXXXD-type acyl-transferase family protein	0.280251	0.397465	0.276099	0.287898	0.161276	0.347446	0.317938	0.26554	N.A.	N.A.	N.A.	N.A.	1.4841	1.69509	1.82468	1.78595	1.87067	1.7362	1.66796	1.79761	N.S.	1.057	0.08	0.50234	Non-Target	NO	NO	NO	NO	NO	NO	NO	1918	1918	0.435	0.435	0.435
AT1G03950	Q941D5	VPS2.3	VPS2.3	vacuolar protein sorting-associated protein 2.3	2.48308	2.46864	2.76625	2.0996	2.29779	2.49646	2.57266	2.29795	N.S.	0.839	-0.253	0.39846	2.53161	2.30512	2.44518	2.52632	2.33634	2.24495	2.42731	2.3692	N.S.	0.966	-0.051	0.62448	PERMISSIVE	NO	YES	NO	NO	NO	3UTR	NO	1023	1023	0.402	0.402	0.402
AT1G03960	A0A1P8AMC2, A0A1P8AMC5, A0A1P8AMG0, Q84JI6, Q84JI6-2	AT1G03960		Calcium-binding EF hand family protein	1.08161	0.924712	1.32196	1.24043	1.20849	1.10175	1.10943	1.18356	N.S.	1.107	0.147	0.65977	0.906085	0.740924	0.931607	0.856631	1.08573	1.35141	0.859539	1.09792	1/1.5<=FC<=1.5	1.482	0.568	1.1e-06	Non-Target	NO	NO	NO	NO	NO	NO	NO	1529, 2255, 2422, 2509, 2518, 2531, 2555	2555	0.404, 0.402, 0.403, 0.405, 0.406, 0.389	0.406	0.402
AT1G03970	P42777	GBF4	GBF4	G-box binding factor 4	3.36022	3.43793	3.38102	3.83802	3.7557	3.74272	3.39306	3.77881	UP	1.535	0.618	0.00115	2.3231	2.31193	2.52856	2.55514	2.63555	2.50591	2.38786	2.56553	1/1.5<=FC<=1.5	1.115	0.158	0.0336	Non-Target	NO	NO	NO	NO	NO	NO	NO	1148	1148	0.429	0.429	0.429
AT1G03980	A0A1P8AVJ0, A0A1P8AVN4, A0A2H1ZEA1, Q9ZWB7	PCS2	ATPCS2, PCS2	phytochelatin synthase 2	1.013	0.929492	1.01582	0.352646	0.186138	0.357037	0.986103	0.298607	DOWN	0.281	-1.83	0.00199	0.611106	0.328872	0.589898	0.437766	0.471077	0.43715	0.509959	0.448665	N.S.	0.966	-0.05	0.75143	Non-Target	NO	NO	NO	NO	NO	NO	NO	1186, 1371, 1596, 1662	1662	0.41, 0.414, 0.416, 0.403	0.416	0.411
AT1G03990	A0A178W689, Q9ZWB9	AT1G03990		Long-chain fatty alcohol dehydrogenase family protein	0.299607	0.326944	0.562465	0.379983	0.244725	0.476878	0.396339	0.367195	N.A.	N.A.	N.A.	N.A.	0.306361	0.291621	0.425291	0.370118	0.455428	0.471337	0.341091	0.432294	1/1.5<=FC<=1.5	1.333	0.415	0.00149	N.A.	NO	NO	NO	NO	NO	NO	NO	2384	2384	0.456	0.456	0.456
AT1G04000	A0A178WMX4, Q8L8R3	AT1G04000		hypothetical protein	2.26588	2.30437	2.21084	2.5849	2.52024	2.5864	2.26036	2.56385	1/1.5<=FC<=1.5	1.42	0.506	0.03263	2.25304	2.46631	2.43822	2.43116	2.58076	2.7916	2.38585	2.60117	N.S.	1.012	0.017	0.90896	Non-Target	NO	NO	NO	NO	NO	NO	NO	1267	1267	0.433	0.433	0.433
AT1G04010	Q4VCM1	PSAT1	ATPSAT1, ERP1, PSAT1	phospholipid sterol acyl transferase 1	1.85509	1.51063	1.35317	1.41921	1.34251	1.27683	1.57296	1.34619	N.S.	0.829	-0.27	0.35657	1.54007	1.46058	1.72838	1.53762	1.66662	1.61299	1.57634	1.60574	N.S.	0.969	-0.045	0.61441	PERMISSIVE	NO	YES	NO	NO	NO	NO	NO	2669	2669	0.416	0.416	0.416
AT1G04020	A0A178W540, F4I442	BARD1	ATBARD1, BARD1, ROW1	breast cancer associated RING 1	1.40782	0.844483	0.763298	1.08732	0.725285	0.689776	1.0052	0.834127	N.S.	0.883	-0.18	0.60168	1.64139	1.42157	1.7252	1.64275	1.69051	1.64946	1.59605	1.66091	1/1.5<=FC<=1.5	1.111	0.152	0.04862	Non-Target	NO	NO	NO	NO	NO	NO	NO	2394, 2476	2476	0.418, 0.422	0.422	0.42
AT1G04030	F4I444, Q9ZWC3	AT1G04030		eisosome protein	1.78276	1.46144	1.29507	1.34431	1.05914	1.11444	1.51309	1.17263	N.S.	0.751	-0.414	0.19661	1.67832	1.60665	1.66433	1.84156	1.62419	1.67204	1.64977	1.7126	1/1.5<=FC<=1.5	0.883	-0.18	0.03463	Non-Target	NO	NO	NO	NO	NO	NO	NO	1519, 1854	1854	0.425, 0.431	0.431	0.428
AT1G04040	Q9ZWC4	AT1G04040		HAD superfamily, subfamily IIIB acid phosphatase	7.56179	7.32033	7.01147	7.10038	7.39085	7.4186	7.29786	7.30328	N.S.	1.053	0.075	0.77904	5.98801	5.96283	6.0747	5.94094	5.8354	5.86547	6.00851	5.8806	N.S.	0.84	-0.252	0.05351	PERMISSIVE	NO	NO	YES	NO	NO	NO	NO	1086	1086	0.433	0.433	0.433
AT1G04050	A0A1P8ANQ7, Q946J2	SUVR1	SDG13, SUVR1	histone-lysine N-methyltransferase SUVR2-like protein	0.368827	0.34655	0.24589	0.583459	0.325557	0.358051	0.320422	0.422356	N.A.	N.A.	N.A.	N.A.	0.842753	0.668418	0.807158	0.683137	0.911614	0.630518	0.772776	0.741756	N.S.	0.925	-0.113	0.28924	Non-Target	NO	NO	NO	NO	NO	5UTR	NO	2455, 2834, 2855	2855	0.43, 0.425, 0.428	0.43	0.428
AT1G04070	O64497	TOM22-I	ATTOM22-I, TOM22-I	translocase of outer membrane 22-I	2.80169	2.62726	2.59034	2.43894	2.69762	2.86684	2.6731	2.6678	N.S.	1.051	0.071	0.8307	4.51636	4.44058	4.30201	4.66757	4.64799	4.57691	4.41965	4.63082	N.S.	1.061	0.085	0.55617	Non-Target	NO	NO	NO	NO	3UTR	NO	NO	690	690	0.419	0.419	0.419
AT1G04080	A0A178W2Y2, A0A178W4I0, A0A1P8ATH2, F4I448, F4I450, O64496, Q93ZR3	PRP39	PRP39, PRP39a	Tetratricopeptide repeat (TPR)-like superfamily protein	3.22657	3.34104	3.22791	3.38046	3.33077	3.30379	3.26517	3.33834	N.S.	1.13	0.177	0.39876	3.05273	2.9965	3.21038	3.40996	3.61465	3.79035	3.08653	3.60498	1/1.5<=FC<=1.5	1.297	0.375	3e-11	STRINGENT	3UTR,3UTR,3UTR,3UTR,3UTR	YES	YES	NO	3UTR	3UTR	Stop codon	2188, 2368, 2759, 2791, 2963	2963	0.446, 0.448, 0.442, 0.434	0.448	0.442
AT1G04090	O64496, Q501D1	AT1G04090		vacuolar sorting-associated protein (DUF946)	0.442899	0.696565	0.427029	0.623468	0.552244	0.42888	0.522164	0.534864	N.S.	1.046	0.065	0.85741	0.671138	0.58443	0.592082	0.745908	0.663659	0.582514	0.615884	0.664027	N.S.	1.08	0.11	0.39018	N.A.	NO	NO	NO	NO	NO	NO	NO	2110	2110	0.423	0.423	0.423
AT1G04100	Q38828	IAA10	IAA10	indoleacetic acid-induced protein 10	1.60712	1.82449	1.56752	2.1406	1.84633	2.01657	1.66638	2.00117	N.S.	1.46	0.546	0.06884	1.31593	1.38178	1.3669	1.32733	1.49119	1.61461	1.35487	1.47771	N.S.	1.013	0.019	0.8671	Non-Target	NO	NO	NO	NO	NO	NO	NO	1308	1308	0.414	0.414	0.414
AT1G04105					0	0	0.707899	0	0	0	0.235966	0	N.A.	N.A.	N.A.	N.A.	N.E.	N.E.	N.E.	N.E.	N.E.	N.E.	N.E.	N.E.	N.E.	N.E.	N.E.	N.E.	N.A.	NO	NO	NO	NO	NO	NO	NO	402	402	0.47	0.47	0.47
AT1G04110	O64495	1	AtSDD1, SDD1	Subtilase family protein	0.0639715	0.050925	0	0	0.0427673	0.0851561	0.0382988	0.0426411	N.A.	N.A.	N.A.	N.A.	0.0134186	0.0126822	0.0229633	0.0161066	0.0556494	0.0779568	0.0163547	0.0499043	N.A.	N.A.	N.A.	N.A.	Non-Target	NO	NO	NO	NO	NO	NO	NO	2513	2513	0.45	0.45	0.45
AT1G04120	A0A1P8AT08, F4I454, Q7GB25	ABCC5	ABCC5, ATABCC5, ATMRP5, MRP5	multidrug resistance-associated protein 5	3.58372	3.404	3.42194	3.40099	3.23038	3.22385	3.46989	3.28508	N.S.	0.893	-0.163	0.37906	2.68183	2.62046	2.93088	3.02109	3.3056	3.34896	2.74439	3.22522	1/1.5<=FC<=1.5	1.385	0.47	5.8e-12	PERMISSIVE	NO	YES	NO	3UTR	NO	NO	3' UTR	5264, 5386, 5620	5620	0.412, 0.413	0.413	0.413
AT1G04130	F4I456, Q940R2	TPR2	AtTPR2, TPR2	Tetratricopeptide repeat (TPR)-like superfamily protein	1.9499	1.98149	1.89753	2.30815	2.18721	2.28512	1.94297	2.26016	1/1.5<=FC<=1.5	1.452	0.538	0.03078	2.75877	2.58704	2.60192	2.54893	2.64652	2.7252	2.64924	2.64022	N.S.	1.032	0.046	0.59414	Non-Target	NO	NO	NO	NO	NO	NO	NO	1027, 1468	1468	0.433	0.433	0.433
AT1G04140	F4I458, Q94C94	AT1G04140		Transducin family protein / WD-40 repeat family protein	4.0403	4.06999	3.89366	3.65213	3.58867	3.66046	4.00132	3.63375	1/1.5<=FC<=1.5	0.748	-0.419	0.01515	3.28932	3.20059	3.58121	3.51669	3.67386	3.81576	3.35704	3.66877	1/1.5<=FC<=1.5	1.102	0.141	0.04182	PERMISSIVE	NO	YES	YES	NO	3UTR	3UTR	3' UTR	3123, 3138	3138	0.44, 0.439	0.44	0.44
AT1G04160	A0A1P8ARX4, F4I460	XIB	ATXIB, XI-8, XI-B, XIB	myosin XI B	2.11622	2.20277	2.26166	1.74058	1.79215	2.06336	2.19355	1.86536	N.S.	0.772	-0.374	0.12775	0.815156	0.723259	0.963423	0.874319	1.25796	1.13361	0.833946	1.08863	1/1.5<=FC<=1.5	1.277	0.353	0.00014	PERMISSIVE	NO	YES	NO	NO	NO	NO	NO	5192, 5282	5282	0.409, 0.411	0.411	0.41
AT1G04170	O64490	EIF2 GAMMA	EIF2 GAMMA	eukaryotic translation initiation factor 2 gamma subunit	4.07378	3.83371	3.73616	3.72219	3.66929	3.54563	3.88121	3.6457	N.S.	0.853	-0.23	0.24978	4.41766	4.4635	4.50715	4.57596	4.67066	4.7893	4.46277	4.67864	N.S.	1.069	0.096	0.31867	STRINGENT	3UTR,3UTR	YES	YES	CDS	3UTR	3UTR	Stop codon	1860, 2026	2026	0.41, 0.406	0.41	0.408
AT1G04180	O64489	YUC9	YUC9	YUCCA 9	4.50682	4.79387	4.34061	3.61728	3.65391	3.8758	4.5471	3.71567	DOWN	0.475	-1.075	8.5e-06	1.13004	0.939944	1.21977	1.16882	0.902821	0.782208	1.09658	0.951282	N.S.	1.091	0.125	0.43273	Non-Target	NO	NO	NO	NO	NO	NO	NO	1649	1649	0.434	0.434	0.434
AT1G04190	Q8RXN1	TPR3	TPR3	Tetratricopeptide repeat (TPR)-like superfamily protein	3.24769	2.86702	2.83082	2.92958	2.7065	2.49788	2.98184	2.71132	N.S.	0.84	-0.252	0.33877	3.74463	3.65419	3.70023	3.46739	3.41056	3.35695	3.69968	3.41163	1/1.5<=FC<=1.5	0.786	-0.347	2.3e-07	PERMISSIVE	NO	YES	YES	NO	3UTR	3UTR	NO	1418	1418	0.412	0.412	0.412
AT1G04200	A0A1P8ATW4, A0A1P8ATY2, Q8RWV1	AT1G04200		dyggve-melchior-clausen syndrome protein	3.20195	2.99605	3.07149	3.01798	3.04705	3.06331	3.08983	3.04278	N.S.	1.012	0.017	0.94337	2.03196	1.94337	2.25805	2.2409	2.35289	2.39181	2.07779	2.32853	1/1.5<=FC<=1.5	1.216	0.282	1.8e-06	PERMISSIVE	NO	YES	YES	NO	NO	NO	NO	2440, 2760, 3102	3102	0.402, 0.405, 0.42	0.42	0.409
AT1G04210	O64486	AT1G04210		Leucine-rich repeat protein kinase family protein	2.38654	2.05994	2.14986	2.24692	2.19628	2.3321	2.19878	2.25844	N.S.	1.114	0.156	0.49525	2.27396	2.1683	2.40529	2.44491	2.56156	2.53802	2.28252	2.51483	1/1.5<=FC<=1.5	1.158	0.212	0.00029	Non-Target	NO	NO	NO	NO	3UTR	NO	NO	4016	4016	0.417	0.417	0.417
AT1G04220	Q5XEP9	KCS2	KCS2	3-ketoacyl-CoA synthase 2	0.0534782	0.178419	0.0814648	0.144873	0.325207	0.287044	0.104454	0.252375	N.A.	N.A.	N.A.	N.A.	3.51584	3.47499	3.38357	3.56628	3.63514	3.73022	3.45813	3.64388	N.S.	0.897	-0.157	0.28814	Non-Target	NO	NO	NO	NO	NO	NO	NO	2044	2044	0.419	0.419	0.419
AT1G04240	A0A1P8AT43, Q38822	SHY2	IAA3, SHY2	AUX/IAA transcriptional regulator family protein	2.8929	2.63878	2.53552	2.88437	2.26378	2.6125	2.68907	2.58688	N.S.	0.988	-0.018	0.95687	2.41621	2.38528	2.35151	2.32287	2.39185	2.05129	2.38433	2.25534	1/1.5<=FC<=1.5	0.73	-0.454	5.6e-05	Non-Target	NO	NO	NO	NO	NO	NO	NO	1189, 1355	1355	0.372, 0.37	0.372	0.371
AT1G04250	P93830	AXR3	AtIAA17, AXR3, IAA17	AUX/IAA transcriptional regulator family protein	6.3987	6.44234	6.40182	6.31271	6.39837	6.40609	6.41429	6.37239	N.S.	1.02	0.029	0.90647	5.2117	5.12412	5.11805	5.24253	4.96583	4.95277	5.15129	5.05371	1/1.5<=FC<=1.5	0.799	-0.323	0.00013	STRINGENT	3UTR	YES	YES	NO	3UTR	3UTR	NO	1317	1317	0.399	0.399	0.399
AT1G04260	P93829	MPI7	MPI7, MPIP7, PRA1.D	CAMV movement protein interacting protein 7	2.36791	2.31024	2.35463	2.73723	2.68629	2.81297	2.34426	2.7455	UP	1.575	0.655	0.00357	3.77803	3.81974	3.66159	3.94407	3.9411	3.9655	3.75312	3.95022	N.S.	0.967	-0.048	0.68372	Non-Target	NO	NO	NO	NO	NO	NO	NO	1287	1287	0.427	0.427	0.427
AT1G04270	F4I472, Q08112	RPS15	RPS15	cytosolic ribosomal protein S15	6.12568	5.69376	5.50388	4.64784	4.69434	4.7303	5.77444	4.69083	DOWN	0.364	-1.459	2.4e-11	7.25798	7.22234	7.19045	6.87695	6.82164	6.78152	7.22359	6.8267	DOWN	0.632	-0.662	2.6e-09	STRINGENT	3UTR,3UTR	YES	YES	NO	3UTR	3UTR, 5UTR	Stop codon	795, 923	923	0.404, 0.411	0.411	0.408
AT1G04280	Q0WUY1	AT1G04280		P-loop containing nucleoside triphosphate hydrolases superfamily protein	2.90382	3.07427	3.19878	2.70928	3.01869	3.17961	3.05896	2.96919	N.S.	0.982	-0.026	0.93619	3.20091	3.24622	3.44927	3.46965	3.33885	3.32328	3.2988	3.37726	N.S.	1.018	0.026	0.84595	Non-Target	NO	NO	NO	3UTR	3UTR	NO	NO	2362, 2510	2510	0.403, 0.398	0.403	0.4
AT1G04290	A0A1P8APX5, P93828, Q9ASQ1	AT1G04290		Thioesterase superfamily protein	3.66817	3.74825	3.60239	3.66185	3.68045	3.35526	3.67293	3.56585	N.S.	0.97	-0.043	0.87728	3.88542	3.67619	3.76973	3.5875	3.21439	2.94916	3.77711	3.25035	1/1.5<=FC<=1.5	0.738	-0.438	6.1e-05	PERMISSIVE	NO	YES	YES	NO	NO	3UTR	NO	384, 1073	1073	0.354, 0.44	0.44	0.397
AT1G04300	A0A178WDY3, A0A178WEG8, A0A1P8AR94, A0A1P8ARC9, A8MQL1, A8MQL1-2, A8MR11, F4I476	AT1G04300	MUSE13, TRAF1b	TRAF-like superfamily protein	2.88787	2.83159	2.97606	3.01164	2.95751	2.83728	2.89851	2.93547	N.S.	1.093	0.129	0.5604	1.93846	1.84999	2.1664	2.18156	2.5762	2.64053	1.98495	2.46609	1/1.5<=FC<=1.5	1.298	0.376	2.6e-06	PERMISSIVE	NO	YES	NO	NO	NO	3UTR	NO	2800, 3535, 3610, 3688, 3758, 3783	3783	0.434, 0.437, 0.44, 0.439	0.44	0.437
AT1G04310	A0A178WDB2, P93825	ERS2	ERS2	ethylene response sensor 2	0.759477	0.751531	0.773316	1.31902	1.23262	0.923403	0.761441	1.15835	UP	1.835	0.876	0.01397	1.21904	1.19587	1.35495	1.27273	1.48979	1.59751	1.25662	1.45334	N.S.	0.9	-0.152	0.22268	Non-Target	NO	NO	NO	NO	NO	NO	NO	2464, 2572	2572	0.454, 0.453	0.454	0.454
AT1G04330	O22691	AT1G04330	PH2	hypothetical protein	0.666882	0.20177	0.552492	0.592876	0.663383	0.324116	0.473715	0.526792	N.A.	N.A.	N.A.	N.A.	3.26281	3.056	3.07413	2.63614	2.72024	2.49423	3.13098	2.61687	1/1.5<=FC<=1.5	0.68	-0.556	2.2e-05	Non-Target	NO	NO	NO	NO	NO	NO	NO	694	694	0.399	0.399	0.399
AT1G04340	O22690	AT1G04340		HR-like lesion-inducing protein-like protein	4.30598	3.68718	3.40148	2.94567	2.57104	2.86857	3.79821	2.79509	DOWN	0.388	-1.364	1.5e-05	4.45295	4.38256	4.35273	4.05983	3.96488	3.90329	4.39608	3.976	DOWN	0.61	-0.714	4.6e-14	PERMISSIVE	NO	YES	YES	3UTR	3UTR	NO	NO	1044	1044	0.385	0.385	0.385
AT1G04350	P93824	AT1G04350		2-oxoglutarate (2OG) and Fe(II)-dependent oxygenase superfamily protein	0.150873	0.0623784	0.0410623	0	0.102302	0	0.0847712	0.0341007	N.A.	N.A.	N.A.	N.A.	1.14306	1.33879	1.52122	1.88342	2.13268	1.55986	1.33436	1.85865	N.S.	1.014	0.02	0.91246	Non-Target	NO	NO	NO	NO	3UTR	3UTR	NO	2066	2066	0.397	0.397	0.397
AT1G04360	P93823	AT1G04360	ATL1	RING/U-box superfamily protein	0.397522	0.0743066	0.0490644	0.24447	0.121472	0.378275	0.173631	0.248072	N.A.	N.A.	N.A.	N.A.	2.362	2.57757	2.52985	2.35766	2.54099	2.40624	2.48981	2.43496	N.S.	1.032	0.046	0.66067	Non-Target	NO	NO	NO	NO	NO	NO	NO	1747	1747	0.4	0.4	0.4
AT1G04370	P93822	ERF14	ATERF14, ERF14, ERF97	Ethylene-responsive element binding factor 14	0	0	0.128355	0	0.161192	0	0.0427851	0.0537305	N.A.	N.A.	N.A.	N.A.	0.236282	0.170929	0.107554	0	0	0	0.171588	0	N.A.	N.A.	N.A.	N.A.	N.A.	NO	NO	NO	NO	NO	NO	NO	736	736	0.424	0.424	0.424
AT1G04380	A0A1P8ASV9, P93821	AT1G04380		2-oxoglutarate (2OG) and Fe(II)-dependent oxygenase superfamily protein	0.0586245	0	0.0455831	0	0	0	0.0347359	0	N.A.	N.A.	N.A.	N.A.	0.0239187	0.0661875	0.0320576	0	0.0583698	0	0.0407212	0.0194566	N.A.	N.A.	N.A.	N.A.	N.A.	NO	NO	NO	NO	NO	NO	NO	1528, 1872	1872	0.418, 0.408	0.418	0.413
AT1G04390	A0A178WA05, P93820, P93820-2	AT1G04390		BTB/POZ domain-containing protein	1.17731	1.17453	1.1569	1.33029	1.54924	1.22634	1.16958	1.36862	N.S.	1.328	0.41	0.14155	0.704618	0.693858	0.975024	0.925481	1.00109	0.845784	0.791167	0.924117	N.S.	1.145	0.196	0.09281	Non-Target	NO	NO	NO	NO	NO	NO	NO	3466	3466	0.424	0.424	0.424
AT1G04400	Q96524	CRY2	AT-PHH1, ATCRY2, CRY2, FHA, PHH1	cryptochrome 2	3.94948	4.00265	4.09707	3.9561	4.14359	4.01393	4.0164	4.03787	N.S.	1.075	0.104	0.65678	3.48494	3.5279	3.89996	3.97445	3.95566	4.04746	3.6376	3.99252	1/1.5<=FC<=1.5	1.139	0.188	0.00017	PERMISSIVE	NO	YES	NO	NO	3UTR	3UTR	NO	2422, 2661	2661	0.412, 0.415	0.415	0.414
AT1G04410	P93819	c-NAD-MDH1	c-NAD-MDH1	Lactate/malate dehydrogenase family protein	7.10328	7.06493	7.03561	7.24548	7.43974	7.36137	7.06794	7.34886	1/1.5<=FC<=1.5	1.389	0.475	0.00546	7.34964	7.4197	7.39649	7.5444	7.65473	7.73925	7.38861	7.64613	N.S.	1.04	0.057	0.64602	STRINGENT	3UTR	YES	YES	NO	3UTR	3UTR, 5UTR, CDS	3' UTR	1613	1613	0.445	0.445	0.445
AT1G04420	Q8VZ23	AT1G04420		NAD(P)-linked oxidoreductase superfamily protein	1.44769	1.3894	1.10643	1.23556	0.59681	1.22823	1.31451	1.0202	N.S.	0.851	-0.233	0.49492	1.50448	1.7325	1.72481	1.33048	1.52921	1.27448	1.65393	1.37806	1/1.5<=FC<=1.5	0.731	-0.452	1.9e-06	STRINGENT	3UTR	YES	NO	NO	3UTR	3UTR	Stop codon	1539	1539	0.441	0.441	0.441
AT1G04430	Q940J9	AT1G04430		S-adenosyl-L-methionine-dependent methyltransferases superfamily protein	4.41157	3.81782	3.57815	3.67389	3.53973	3.37943	3.93585	3.53102	N.S.	0.727	-0.459	0.09086	4.14464	4.06293	4.28048	4.09363	4.14991	4.26508	4.16268	4.16954	N.S.	0.99	-0.015	0.8892	STRINGENT	3UTR,3UTR,3UTR	NO	YES	3UTR	3UTR	3UTR	NO	2473, 2517, 2593	2593	0.404, 0.409, 0.408	0.409	0.407
AT1G04440	Q5XF24	CKL13	CKL13	casein kinase like 13	4.11979	4.16675	4.31623	3.9137	4.0937	4.09577	4.20092	4.03439	N.S.	0.911	-0.134	0.56944	3.05321	3.11544	3.44983	3.42733	3.3773	3.39893	3.20616	3.40119	1/1.5<=FC<=1.5	1.08	0.111	0.02895	Non-Target	NO	NO	NO	NO	3UTR	3UTR	NO	2407	2407	0.39	0.39	0.39
AT1G04445	A0A1P8AWD1, P93815	AT1G04445		C2H2-like zinc finger protein	2.27758	2.27443	2.30927	1.57008	2.01293	1.65546	2.28709	1.74616	N.S.	0.678	-0.56	0.10498	0.199364	0.0667994	0.408023	0.0838061	0.406317	0.627073	0.224729	0.372399	N.S.	1.069	0.097	0.58164	Non-Target	NO	NO	NO	NO	NO	NO	NO	596, 1103	1103	0.393, 0.507	0.507	0.45
AT1G04450	F4I5N6	RIC3	RIC3	ROP-interactive CRIB motif-containing protein 3	0.0555596	0	0	0	0	0	0.0185199	0	N.A.	N.A.	N.A.	N.A.	0	0	0.0328079	0	0	0	0.010936	0	N.A.	N.A.	N.A.	N.A.	N.A.	NO	NO	NO	NO	NO	NO	NO	1057	1057	0.426	0.426	0.426
AT1G04455	A0A1P8AQU8	AT1G04455		hypothetical protein	0	0	0	0	0	0.406157	0	0.135386	N.A.	N.A.	N.A.	N.A.	0.304951	0	0	1.07614	0.294902	0	0.10165	0.457015	N.S.	1.093	0.129	0.18508	N.A.	NO	NO	NO	NO	NO	NO	NO	354	354	0.398	0.398	0.398
AT1G04470	P93812	AT1G04470		hypothetical protein (DUF810)	0.0149349	0.0350968	0.0229428	0.0211018	0.0857795	0	0.0243248	0.0356271	N.A.	N.A.	N.A.	N.A.	0.00900929	0	0	0	0	0	0.0030031	0	N.A.	N.A.	N.A.	N.A.	N.A.	NO	NO	NO	NO	NO	NO	NO	3611	3611	0.456	0.456	0.456
AT1G04480	P49690	AT1G04480		Ribosomal protein L14p/L23e family protein	4.41141	3.8058	3.56675	3.01849	3.12846	3.0236	3.92799	3.05685	DOWN	0.445	-1.17	7.1e-05	7.06704	7.04184	6.87985	6.5149	6.34456	6.23586	6.99624	6.36511	DOWN	0.591	-0.76	1.1e-10	STRINGENT	3UTR	YES	YES	NO	3UTR	3UTR, 5UTR	Stop codon	822	822	0.401	0.401	0.401
AT1G04490	A0A1P8ARL2, P93811, Q67XK9	AT1G04490		hypothetical protein (DUF3527)	1.66302	1.30558	1.39274	1.67087	1.87324	1.89916	1.45378	1.81443	UP	1.508	0.593	0.04276	0.751852	0.390433	0.713371	0.603147	0.60095	0.478795	0.618552	0.560964	N.S.	1.091	0.126	0.38011	Non-Target	NO	NO	NO	NO	NO	NO	NO	1608, 1612, 1663, 1750, 1769, 1805, 2031, 2131, 2191	2191	0.376, 0.375, 0.359, 0.371, 0.366, 0.365, 0.377, 0.383, 0.378	0.383	0.372
AT1G04500	A0A1P8ATF4, A0A1P8ATH6, Q1PFY7, Q8GXK9	AT1G04500		CCT motif family protein	0	0	0	0.0980292	0	0	0	0.0326764	N.A.	N.A.	N.A.	N.A.	0	0	0	0	0.0234665	0	0	0.00782217	N.A.	N.A.	N.A.	N.A.	N.A.	NO	NO	NO	NO	NO	NO	NO	1581, 1622, 1698, 1756	1756	0.389, 0.382, 0.388, 0.394	0.394	0.388
AT1G04510	F4I5P3, Q94BR4	MAC3A	MAC3A	MOS4-associated complex 3A	3.01589	2.69815	2.72995	2.64903	2.82214	2.57855	2.81466	2.68324	N.S.	0.937	-0.093	0.71382	3.62741	3.63869	3.72902	3.70571	3.96646	4.02385	3.66504	3.89867	N.S.	1.102	0.14	0.12766	STRINGENT	3UTR,3UTR	YES	YES	NO	3UTR	3UTR	Stop codon	1981, 2193	2193	0.43, 0.441	0.441	0.436
AT1G04520	Q6NM73	PDLP2	PDLP2	plasmodesmata-located protein 2	1.83014	1.37819	1.12975	1.43978	1.30508	1.21377	1.44603	1.31954	N.S.	0.919	-0.122	0.72594	3.13342	3.03546	2.97859	3.12225	3.0291	2.83852	3.04916	2.99662	N.S.	0.952	-0.07	0.59102	Non-Target	NO	NO	NO	3UTR	NO	NO	NO	1569	1569	0.396	0.396	0.396
AT1G04530	Q8VZ31	TPR4	TPR4	Tetratricopeptide repeat (TPR)-like superfamily protein	3.40473	3.06763	3.09289	2.85705	2.84076	2.8345	3.18842	2.8441	N.S.	0.761	-0.393	0.05742	3.19816	3.17426	3.19066	3.23005	3.1462	3.05826	3.18769	3.14484	1/1.5<=FC<=1.5	0.835	-0.26	1.3e-07	STRINGENT	3UTR	YES	NO	NO	3UTR	3UTR	NO	1524	1524	0.402	0.402	0.402
AT1G04540	F4I5P7, O23030	AT1G04540		Calcium-dependent lipid-binding (CaLB domain) family protein	1.25069	1.05836	0.767506	1.12764	0.592998	0.740835	1.02552	0.82049	N.S.	0.879	-0.186	0.58808	1.18059	1.08974	1.33863	1.41007	1.26315	1.20596	1.20299	1.29306	N.S.	0.954	-0.069	0.49813	Non-Target	NO	NO	NO	NO	NO	NO	NO	2446	2446	0.423	0.423	0.423
AT1G04550	F4I5P9, Q38830	IAA12	BDL, IAA12	AUX/IAA transcriptional regulator family protein	2.26332	2.12165	2.12788	2.76724	2.30875	2.18736	2.17095	2.42112	N.S.	1.349	0.432	0.13329	2.46397	2.38043	2.52208	2.6105	2.5242	2.58214	2.45549	2.57228	N.S.	0.96	-0.058	0.63975	Non-Target	NO	NO	NO	3UTR	3UTR	3UTR	NO	1355, 1391	1391	0.41, 0.408	0.41	0.409
AT1G04555	Q1G3F4, Q1G400	AT1G04555		transmembrane protein	2.65608	2.4153	2.30948	1.77459	1.59163	2.02658	2.46028	1.7976	DOWN	0.557	-0.845	0.0061	1.76018	1.68551	1.79662	1.84884	1.6719	1.66409	1.74744	1.72828	1/1.5<=FC<=1.5	0.791	-0.338	0.00763	Non-Target	NO	NO	NO	NO	NO	3UTR	NO	991	991	0.383	0.383	0.383
AT1G04560	O23029	AT1G04560		AWPM-19-like family protein	0.257292	0.418612	0.293858	0.419499	0.255618	0.259397	0.323254	0.311504	N.A.	N.A.	N.A.	N.A.	0.146897	0.0941313	0	1.33504	2.99067	0	0.0803429	1.4419	UP	7.406	2.889	0.03752	N.A.	NO	NO	NO	NO	NO	NO	NO	855	855	0.42	0.42	0.42
AT1G04570	A0A1P8APB4, F4I5Q2	AT1G04570		Major facilitator superfamily protein	0.209075	0.614692	0.412419	0.570624	0.626796	0.433229	0.412062	0.54355	N.A.	N.A.	N.A.	N.A.	0.202416	0.287337	0.316163	0.352933	0.353358	0.344546	0.268639	0.350279	N.S.	0.948	-0.077	0.65367	N.A.	NO	NO	NO	NO	NO	NO	NO	2038, 2163	2163	0.417, 0.421	0.421	0.419
AT1G04580	Q7G191	AO4	AAO4, AO4, ATAO-4, ATAO2	aldehyde oxidase 4	0	0.0273963	0.0354337	0	0	0	0.0209433	0	N.A.	N.A.	N.A.	N.A.	0	0.0131048	0.00598108	0.0166673	0.00737474	0	0.00636194	0.00801402	N.A.	N.A.	N.A.	N.A.	N.A.	NO	NO	NO	NO	NO	NO	NO	4604	4604	0.419	0.419	0.419
AT1G04590	F4I5Q5, Q9C5I2	AT1G04590		PPR containing-like protein	2.03327	1.46346	1.65834	1.49339	1.61146	1.42617	1.71836	1.51034	N.S.	0.857	-0.222	0.48613	2.95516	2.88976	2.8965	2.91709	2.85012	2.66734	2.91381	2.81152	N.S.	0.948	-0.077	0.32144	Non-Target	NO	NO	NO	3UTR	NO	3UTR	Stop codon	1351, 1409	1409	0.428, 0.425	0.428	0.426
AT1G04600	A0A178W734, A0A178WEH2, F4I5Q6	XIA	ATXIA, XIA	myosin XI A	0.0629335	0.0640231	0.0420149	0.0880438	0.0361593	0.0757955	0.0563238	0.0666662	N.A.	N.A.	N.A.	N.A.	0.04825	0.0457322	0.0596585	0.0131669	0.0946063	0	0.0512136	0.0359244	N.A.	N.A.	N.A.	N.A.	N.A.	NO	NO	NO	NO	NO	NO	NO	5766	5766	0.413	0.413	0.413
AT1G04610	O23024	YUC3	YUC3	YUCCA 3	3.77056	3.62002	3.32514	3.05397	2.59882	3.07591	3.57191	2.90957	DOWN	0.577	-0.793	0.00178	2.18855	1.97339	2.15602	2.07912	2.06875	2.24715	2.10598	2.13167	N.S.	0.997	-0.004	0.97001	Non-Target	NO	NO	NO	NO	NO	NO	NO	1774	1774	0.416	0.416	0.416
AT1G04620	A0A178W7H4, Q8GS60	HCAR	HCAR	coenzyme F420 hydrogenase family / dehydrogenase, beta subunit family	0.630549	0.69925	0.637387	0.193568	0.139279	0.442979	0.655729	0.258609	N.S.	0.519	-0.946	0.05231	0.316883	0.341013	0.258586	0.211014	0.457329	0.136771	0.305494	0.268371	1/1.5<=FC<=1.5	0.697	-0.522	0.00437	Non-Target	NO	NO	NO	NO	NO	NO	NO	2222	2222	0.418	0.418	0.418
AT1G04625	F4I5Q9	AT1G04625		Polynucleotidyl transferase, ribonuclease H-like superfamily protein	0.0802418	0.333519	0.224371	0.219971	0.223012	0.156404	0.21271	0.199795	N.A.	N.A.	N.A.	N.A.	N.E.	N.E.	N.E.	N.E.	N.E.	N.E.	N.E.	N.E.	N.E.	N.E.	N.E.	N.E.	N.A.	NO	NO	NO	NO	NO	NO	NO	774	774	0.42	0.42	0.42
AT1G04630	Q8RWA7	MEE4	MEE4	GRIM-19 protein	5.14785	5.10593	5.13354	4.85133	5.00909	5.00873	5.12911	4.95638	N.S.	0.909	-0.137	0.50794	5.11011	5.1285	5.05336	4.91203	4.78278	4.87631	5.09732	4.85704	1/1.5<=FC<=1.5	0.772	-0.374	9e-05	PERMISSIVE	NO	YES	YES	3UTR	NO	3UTR	Stop codon	745	745	0.444	0.444	0.444
AT1G04635	Q6AWV1	EMB1687	AtPOP5, EMB1687, POP5	ribonuclease P family protein / Rpp14 family protein	0.926603	0.3531	0.813666	1.19319	0.957051	0.309242	0.69779	0.819828	N.S.	1.084	0.117	0.69842	3.44263	3.47825	3.22965	3.40308	3.18895	2.71292	3.38351	3.10165	N.S.	0.919	-0.121	0.43592	Non-Target	NO	NO	NO	NO	NO	NO	NO	725	725	0.392	0.392	0.392
AT1G04640	Q9SXP7	LIP2	LIP2	lipoyltransferase 2	1.3248	0.835489	1.06558	0.672268	0.995234	1.00581	1.07529	0.891104	N.S.	0.897	-0.157	0.64653	2.25619	2.17848	2.1184	2.4638	2.16324	2.07522	2.18436	2.23409	N.S.	0.93	-0.105	0.38168	Non-Target	NO	NO	NO	NO	CDS, 3UTR	3UTR	NO	994, 1139	1139	0.397, 0.406	0.406	0.402
AT1G04645	O23020	AT1G04645		Plant self-incompatibility protein S1 family	0.260513	0	0	0.192286	0	0	0.0868375	0.0640953	N.A.	N.A.	N.A.	N.A.	N.E.	N.E.	N.E.	N.E.	N.E.	N.E.	N.E.	N.E.	N.E.	N.E.	N.E.	N.E.	N.A.	NO	NO	NO	NO	NO	NO	NO	494	494	0.372	0.372	0.372
AT1G04650	A0A178WEL9, A0A1P8AVU0	AT1G04650	FLIP	holliday junction resolvase	0.361351	0.172923	0.317008	0.260083	0.277532	0.566644	0.283761	0.368086	N.A.	N.A.	N.A.	N.A.	0.613097	0.572414	0.686022	0.812279	0.885296	0.62983	0.623844	0.775802	N.S.	1.149	0.2	0.05787	Non-Target	NO	NO	NO	NO	NO	NO	NO	2767, 3380	3380	0.412, 0.415	0.415	0.414
AT1G04660	O23018, Q8L8Q2	AT1G04660		glycine-rich protein	0.116896	0	0.120332	0.0569955	0	0.223371	0.0790761	0.0934554	N.A.	N.A.	N.A.	N.A.	0.447009	0.620192	0.818146	1.09439	3.40959	0.891864	0.628449	1.79861	UP	4.731	2.242	0.00152	Non-Target	NO	NO	NO	NO	NO	NO	NO	1406	1406	0.429	0.429	0.429
AT1G04670	Q5Q0I9	AT1G04670		hypothetical protein	0.225346	0	0	0.21476	0	0.157068	0.0751153	0.123943	N.A.	N.A.	N.A.	N.A.	0.118452	0.2573	0.0522224	0.258743	0.231788	0	0.142658	0.163511	N.A.	N.A.	N.A.	N.A.	N.A.	NO	NO	NO	NO	NO	NO	NO	763	763	0.355	0.355	0.355
AT1G04680	Q940Q1	AT1G04680		Pectin lyase-like superfamily protein	4.32152	3.58168	3.34728	3.68067	3.52595	3.33233	3.75016	3.51298	N.S.	0.842	-0.249	0.41168	4.04779	4.04236	4.11966	4.12721	4.2858	4.41933	4.06994	4.27745	N.S.	1.005	0.008	0.94523	Non-Target	NO	NO	NO	NO	NO	NO	NO	2074	2074	0.431	0.431	0.431
AT1G04690	O23016	KAB1	KAB1, KV-BETA1	potassium channel beta subunit 1	5.00049	4.75296	4.51141	4.04247	4.13141	4.00814	4.75495	4.06067	DOWN	0.542	-0.884	7.3e-06	4.64153	4.59107	4.57074	4.40658	4.30216	4.29711	4.60111	4.33528	1/1.5<=FC<=1.5	0.727	-0.461	1.2e-13	PERMISSIVE	NO	YES	YES	NO	3UTR	3UTR	Stop codon	1609	1609	0.412	0.412	0.412
AT1G04700	A0A1P8AMW0, F4I5S1	AT1G04700		PB1 domain-containing protein tyrosine kinase	1.77549	1.94071	2.0144	1.61191	1.73656	1.86432	1.9102	1.7376	N.S.	0.891	-0.166	0.54905	0.815062	0.70107	0.908474	0.900892	0.8882	0.974232	0.808202	0.921108	N.S.	1.135	0.182	0.06429	Non-Target	NO	NO	NO	NO	NO	NO	NO	3260, 3819, 4082	4082	0.402, 0.406	0.406	0.403
AT1G04710	Q8LF48	PKT4	KAT1, PKT4	peroxisomal 3-ketoacyl-CoA thiolase 4	1.98119	1.63495	1.73089	1.51223	1.34725	1.26735	1.78234	1.37561	N.S.	0.698	-0.518	0.07938	1.86083	1.85632	1.97705	1.51697	1.62444	1.75735	1.89807	1.63292	1/1.5<=FC<=1.5	0.757	-0.403	2.4e-07	PERMISSIVE	NO	YES	YES	3UTR	NO	NO	Stop codon	1672	1672	0.445	0.445	0.445
AT1G04730	A0A1P8ASP2, F4I5S3	CTF18	CTF18	P-loop containing nucleoside triphosphate hydrolases superfamily protein	1.06506	0.754044	0.655471	0.517162	0.399048	0.449291	0.824859	0.455167	DOWN	0.572	-0.805	0.04078	0.864039	0.598195	0.921536	0.852629	1.00639	0.625287	0.79459	0.828101	N.S.	1.08	0.111	0.4039	Non-Target	NO	NO	NO	NO	NO	NO	NO	2562, 3099, 3114, 3201	3201	0.417, 0.418, 0.405	0.418	0.414
AT1G04750	A0A1P8AS81, Q9ZTW3	VAMP721	AT VAMP7B, ATVAMP721, VAMP721, VAMP7B	vesicle-associated membrane protein 721	5.57661	5.39667	5.32283	4.89208	4.88674	4.8941	5.43204	4.89097	DOWN	0.631	-0.664	8.8e-06	5.02252	4.96326	4.96887	4.59361	4.4755	4.33351	4.98488	4.46754	DOWN	0.59	-0.761	< 2e-16	STRINGENT	3UTR,3UTR,3UTR,3UTR	YES	YES	NO	3UTR	3UTR	3' UTR	1089, 1165, 1207, 1276	1276	0.404, 0.391, 0.389, 0.393	0.404	0.394
AT1G04760	A0A178W9Q6, Q9MAS5	VAMP726	ATVAMP726, VAMP726	vesicle-associated membrane protein 726	1.08706	0.838162	0.908908	0.843775	0.426432	0.687124	0.94471	0.652444	N.S.	0.818	-0.29	0.40172	1.40683	1.43895	1.48706	1.08608	1.29366	1.3587	1.44428	1.24615	1/1.5<=FC<=1.5	0.841	-0.249	0.02519	Non-Target	NO	NO	NO	NO	NO	NO	NO	1179, 1379	1379	0.416, 0.41	0.416	0.413
AT1G04770	Q8L730	AT1G04770	SD!2	Tetratricopeptide repeat (TPR)-like superfamily protein	2.91912	3.31969	3.31183	3.78998	3.80899	4.23696	3.18355	3.94531	UP	2.171	1.118	0.00011	2.94666	2.85092	2.55851	3.23395	3.1623	2.87017	2.78536	3.08881	N.S.	1.146	0.196	0.13666	Non-Target	NO	NO	NO	NO	NO	NO	NO	1284	1284	0.418	0.418	0.418
AT1G04778	A0A178W2B6	AT1G04778		hypothetical protein	1.09871	1.23835	1.0025	1.1988	1.54265	1.55575	1.11318	1.4324	N.S.	1.346	0.429	0.22932	3.35988	3.11717	3.01663	3.16596	3.16079	2.2819	3.16456	2.86955	1/1.5<=FC<=1.5	0.7	-0.515	0.00112	Non-Target	NO	NO	NO	NO	NO	NO	NO	848	848	0.413	0.413	0.413
AT1G04780	Q8GXW8, Q8LFL1, Q9MAS7	AT1G04780		Ankyrin repeat family protein	3.02064	2.95817	3.01913	3.23614	3.40888	3.23861	2.99931	3.29454	1/1.5<=FC<=1.5	1.413	0.498	0.00693	2.25223	2.14478	2.5856	2.62187	2.77914	2.80577	2.32754	2.73559	1/1.5<=FC<=1.5	1.34	0.422	1.9e-09	Non-Target	NO	NO	NO	NO	3UTR	NO	NO	3161	3161	0.415	0.415	0.415
AT1G04790	Q93XZ6	AT1G04790		RING/U-box superfamily protein	2.48204	2.17965	2.28247	1.98751	1.97325	1.90128	2.31472	1.95401	1/1.5<=FC<=1.5	0.732	-0.449	0.03571	1.88317	1.94725	2.20246	1.93187	2.06445	2.1486	2.01096	2.04831	N.S.	0.952	-0.072	0.3767	PERMISSIVE	NO	YES	NO	NO	NO	3UTR	NO	2751	2751	0.427	0.427	0.427
AT1G04800	Q9MAS9	AT1G04800		glycine-rich protein	0.163154	0	0	0	0	0	0.0543847	0	N.A.	N.A.	N.A.	N.A.	0.184541	0.23608	0.37223	0.290178	0.76352	0.788164	0.264284	0.613954	N.S.	1.102	0.14	0.42541	Non-Target	NO	NO	NO	NO	NO	NO	CDS	1027	1027	0.444	0.444	0.444
AT1G04810	Q9MAT0	AT1G04810		26S proteasome regulatory complex, non-ATPase subcomplex, Rpn2/Psmd1 subunit	3.74037	3.59562	3.47348	3.38246	3.63229	3.49568	3.60316	3.50347	N.S.	0.971	-0.043	0.86153	3.39809	3.40987	3.56993	3.63038	3.85786	4.02328	3.4593	3.83717	1/1.5<=FC<=1.5	1.171	0.227	0.00338	PERMISSIVE	NO	YES	YES	NO	3UTR	3UTR	NO	3435	3435	0.444	0.444	0.444
AT1G04820	B9DGT7	TUA4	TOR2, TUA4	tubulin alpha-4 chain	5.96153	5.75785	5.49951	5.77043	5.58424	5.59876	5.73963	5.65114	N.S.	0.973	-0.039	0.87533	6.26239	6.29951	6.27919	6.43469	6.47066	6.60438	6.28037	6.50324	N.S.	1.013	0.019	0.9055	STRINGENT	3UTR	YES	YES	CDS	3UTR	3UTR	Stop codon	1971	1971	0.44	0.44	0.44
AT1G04830	A0A178WN12, A0A1P8AWI2, F4I5T4, Q84K76	AT1G04830		Ypt/Rab-GAP domain of gyp1p superfamily protein	3.249	3.42534	3.43003	3.38071	3.60555	3.56866	3.36812	3.51831	N.S.	1.201	0.265	0.26368	1.85952	1.77072	2.10483	2.14126	2.27376	2.23583	1.91169	2.21695	N.S.	1.057	0.08	0.28412	Non-Target	NO	NO	NO	NO	NO	NO	NO	1525, 1735, 1763	1763	0.442, 0.436, 0.445	0.445	0.441
AT1G04840	Q9MAT2	AT1G04840		Tetratricopeptide repeat (TPR)-like superfamily protein	0.185531	0.0923449	0.146092	0.184231	0.149971	0.152355	0.141323	0.162186	N.A.	N.A.	N.A.	N.A.	0.344142	0.302245	0.44937	0.381194	0.304612	0.514463	0.365252	0.40009	1/1.5<=FC<=1.5	1.38	0.465	0.00033	Non-Target	NO	NO	NO	NO	NO	NO	NO	2703	2703	0.405	0.405	0.405
AT1G04850	A0A1P8AW60, Q9MAT3	AT1G04850		ubiquitin-associated (UBA)/TS-N domain-containing protein	4.81062	4.80037	4.74207	4.7418	4.74333	4.70688	4.78435	4.73067	N.S.	1.009	0.013	0.95545	4.42279	4.41499	4.55172	4.5696	4.55739	4.58025	4.46316	4.56908	N.S.	1.02	0.029	0.71151	STRINGENT	3UTR,3UTR	YES	YES	NO	3UTR	3UTR	Stop codon	1665, 1669	1669	0.419, 0.446	0.446	0.432
AT1G04860	Q8W4N3	UBP2	ATUBP2, UBP2	ubiquitin-specific protease 2	2.42569	2.25877	2.35165	2.15545	2.34139	2.40698	2.34537	2.30127	N.S.	1.017	0.024	0.93443	2.27968	2.11236	2.4153	2.54637	2.57975	2.68154	2.26911	2.60255	1/1.5<=FC<=1.5	1.164	0.219	5.7e-05	PERMISSIVE	NO	YES	YES	NO	3UTR	NO	NO	3438	3438	0.421	0.421	0.421
AT1G04870	Q9MAT5, Q9MAT5-2	PRMT10	ATPRMT10, PRMT10	protein arginine methyltransferase 10	2.31417	1.76441	1.82829	1.30105	1.50244	1.30517	1.96896	1.36955	DOWN	0.55	-0.863	0.00766	4.16077	4.09071	4.15692	3.95942	3.96289	3.92916	4.13613	3.95049	1/1.5<=FC<=1.5	0.827	-0.274	0.00031	PERMISSIVE	NO	YES	YES	NO	3UTR	NO	NO	1537, 1626	1626	0.425, 0.42	0.425	0.422
AT1G04890	A0A178W5J8, F4I759, Q9MAT7	AT1G04890		zein-binding protein (Protein of unknown function, DUF593)	0	0	0	0.0386148	0	0	0	0.0128716	N.A.	N.A.	N.A.	N.A.	N.E.	N.E.	N.E.	N.E.	N.E.	N.E.	N.E.	N.E.	N.E.	N.E.	N.E.	N.E.	N.A.	NO	NO	NO	NO	NO	NO	NO	2023	2023	0.363	0.363	0.363
AT1G04900	Q94C90	AT1G04900		NADH dehydrogenase ubiquinone complex I, assembly factor-like protein (DUF185)	1.768	1.27152	1.18831	0.873825	1.01447	0.898856	1.40928	0.92905	DOWN	0.599	-0.739	0.04488	2.66499	2.59064	2.72701	2.58109	2.41852	2.21622	2.66088	2.40528	1/1.5<=FC<=1.5	0.882	-0.182	0.01902	PERMISSIVE	NO	YES	YES	NO	NO	NO	NO	1734	1734	0.408	0.408	0.408
AT1G04910	Q8W486	AT1G04910		O-fucosyltransferase family protein	3.23832	2.8641	2.80651	2.86732	2.75925	2.6538	2.96964	2.76013	N.S.	0.87	-0.202	0.40107	3.25493	3.08086	3.25833	3.21888	3.30506	3.34985	3.19804	3.29126	N.S.	0.998	-0.003	0.95556	PERMISSIVE	NO	YES	YES	NO	NO	3UTR	NO	2097	2097	0.427	0.427	0.427
AT1G04920	Q8RY24	SPS3F	ATSPS3F, SPS3F	sucrose phosphate synthase 3F	0.0722379	0.068717	0.149933	0.100903	0.189039	0.114176	0.0969625	0.134706	N.A.	N.A.	N.A.	N.A.	0.0354048	0.0084849	0.0305379	0.0320383	0.142335	0	0.0248092	0.0581245	N.A.	N.A.	N.A.	N.A.	Non-Target	NO	NO	NO	NO	NO	NO	NO	3626	3626	0.447	0.447	0.447
AT1G04930	A0A1P8AV54, F4I764, Q8L4Z1, Q9MAU1	AT1G04930		hydroxyproline-rich glycoprotein family protein	1.47152	1.32789	1.77829	1.71034	1.6919	1.89268	1.5259	1.76497	N.S.	1.263	0.337	0.28862	1.56711	1.50695	1.48851	1.67273	1.70071	1.81137	1.52086	1.72827	N.S.	1.115	0.157	0.10877	Non-Target	NO	NO	NO	NO	NO	NO	NO	1360, 1406, 1409	1409	0.455, 0.452	0.455	0.453
AT1G04940	Q8GZ79	Tic20-I	atTIC20, AtTic20-I, TIC20, Tic20-I	translocon at the inner envelope membrane of chloroplasts 20	2.41332	2.46704	2.36645	2.3565	2.10054	2.16237	2.41561	2.20647	N.S.	0.885	-0.176	0.52399	2.89844	3.11199	3.1139	2.81543	2.83769	2.88343	3.04144	2.84552	1/1.5<=FC<=1.5	0.733	-0.448	2.8e-12	STRINGENT	3UTR	YES	YES	3UTR	3UTR	3UTR	Stop codon	1198	1198	0.431	0.431	0.431
AT1G04945	A0A178WNX8, A0A1P8ANR0, A8MRX6, F4I765	AT1G04945		HIT-type Zinc finger family protein	0.730133	0.756767	0.561941	1.0396	1.07564	0.835168	0.682947	0.983467	N.S.	1.507	0.591	0.11313	1.6018	1.81699	1.85823	2.02343	2.06535	2.19586	1.75901	2.09488	1/1.5<=FC<=1.5	1.354	0.437	3.7e-06	PERMISSIVE	NO	YES	YES	NO	NO	NO	coding_intron	1596, 1626, 1698, 2532	2532	0.425, 0.406, 0.409, 0.408	0.425	0.412
AT1G04950	Q9MAU3	TAFII59	ATTAF6, EMB2781, TAF6, TAFII59	TATA BOX ASSOCIATED FACTOR II 59	2.30686	2.00391	1.93427	1.89662	1.77915	1.84164	2.08168	1.83914	N.S.	0.83	-0.268	0.29308	1.68625	1.61896	1.85084	1.96373	1.95758	2.14736	1.71868	2.02289	N.S.	1.046	0.065	0.49923	PERMISSIVE	NO	YES	NO	NO	NO	3UTR	NO	2140, 2254, 2362	2362	0.416, 0.414, 0.418	0.418	0.416
AT1G04960	A8MRN9, Q9MAU4	AT1G04960		golgin family A protein (DUF1664)	4.08505	3.91907	4.03838	3.96312	4.06024	4.13276	4.01417	4.05204	N.S.	1.097	0.133	0.52728	3.15506	3.06231	3.09287	3.22939	3.08762	2.98654	3.10341	3.10118	N.S.	0.981	-0.028	0.66468	Non-Target	NO	NO	NO	NO	NO	3UTR	Stop codon	1450, 1698	1698	0.397, 0.404	0.404	0.4
AT1G04970	A0A178WB15, F4I775, Q9MAU5	AT1G04970	LBR-1	lipid-binding serum glycoprotein family protein	3.30892	3.29448	3.395	2.91111	2.95041	3.10185	3.3328	2.98779	N.S.	0.77	-0.377	0.07252	2.91846	2.94219	3.08193	3.24135	3.25167	3.07071	2.98086	3.18791	N.S.	0.98	-0.029	0.61026	Non-Target	NO	NO	NO	NO	3UTR	3UTR	Stop codon	1791, 1828, 2082	2082	0.406, 0.405, 0.396	0.406	0.402
AT1G04980	A0A178W5Z5, Q9MAU6	PDIL2-2	ATPDI10, ATPDIL2-2, PDI10, PDIL2-2	PDI-like 2-2	4.51999	4.07824	3.99079	3.79731	3.74543	3.77945	4.19634	3.77406	1/1.5<=FC<=1.5	0.711	-0.493	0.02078	3.67564	3.61166	3.58391	3.37342	3.60551	3.70586	3.62374	3.56159	N.S.	1.023	0.033	0.77591	PERMISSIVE	NO	YES	YES	NO	NO	NO	NO	1667	1667	0.424	0.424	0.424
AT1G04985	A0A384LBS7, Q84JL8	AT1G04985		triacylglycerol lipase-like protein	3.04699	2.94331	3.10641	3.06389	3.25073	3.29532	3.03224	3.20331	N.S.	1.235	0.305	0.17443	2.53459	2.44098	2.59964	2.46655	2.485	2.39195	2.52507	2.44783	N.S.	0.922	-0.116	0.28992	STRINGENT	3UTR,3UTR	YES	YES	StopCodon	3UTR	3UTR	NO	1539, 2122	2122	0.402, 0.39	0.402	0.396
AT1G04990	A0A1P8AWC1, A0A1P8AWC2, A0A1P8AWC3, Q570S8, Q94AD9	AT1G04990		Zinc finger C-x8-C-x5-C-x3-H type family protein	3.93826	3.815	3.81705	3.88052	4.08129	3.85866	3.85677	3.94016	N.S.	1.148	0.199	0.32876	2.89281	2.96064	3.15811	3.13317	3.3657	3.31911	3.00385	3.27266	1/1.5<=FC<=1.5	1.209	0.274	0.00638	Non-Target	NO	NO	NO	3UTR	NO	NO	NO	1648, 1715, 1815, 1921, 2075, 2181	2181	0.438, 0.405, 0.414, 0.408, 0.418, 0.43	0.438	0.419
AT1G05000	A0A178WMF8, A0A1P8ATV0, F4I780, Q9ZVN4	PFA-DSP1	AtPFA-DSP1, PFA-DSP1	Phosphotyrosine protein phosphatases superfamily protein	2.05986	2.19122	2.23468	2.55411	2.2351	2.52545	2.16192	2.43822	N.S.	1.363	0.447	0.10226	3.16991	2.98651	2.96937	2.91928	2.87604	2.62647	3.04193	2.80726	N.S.	0.946	-0.08	0.60274	PERMISSIVE	NO	YES	NO	3UTR	NO	NO	NO	1245, 1341, 2909	2909	0.37, 0.4, 0.399	0.4	0.39
AT1G05010	Q06588	EFE	ACO4, EAT1, EFE	ethylene-forming enzyme	2.40639	2.17063	2.55113	2.79661	2.76	2.40103	2.37605	2.65254	N.S.	1.347	0.43	0.11108	3.25661	3.27983	3.16936	3.50317	3.49347	3.37244	3.23527	3.45636	N.S.	1.037	0.052	0.74577	Non-Target	NO	NO	NO	NO	NO	5UTR	NO	1529	1529	0.398	0.398	0.398
AT1G05020	Q9ZVN6	AT1G05020	AP180, PICALM6	ENTH/ANTH/VHS superfamily protein	0.337969	0.372884	0.482795	0.165525	0.224709	0.325276	0.397883	0.238503	N.A.	N.A.	N.A.	N.A.	0.328249	0.228713	0.368416	0.445024	0.305054	0.698512	0.308459	0.482863	N.S.	0.84	-0.252	0.1171	Non-Target	NO	NO	NO	NO	NO	NO	NO	2609	2609	0.436	0.436	0.436
AT1G05030	A0A1P8ANF6, Q0WVE9, Q0WVE9-2	AT1G05030		Major facilitator superfamily protein	1.87918	2.05291	1.9911	1.96635	1.74784	2.04982	1.9744	1.92134	N.S.	1.008	0.011	0.97405	0.974226	0.846986	1.25949	0.976166	1.22569	1.21399	1.0269	1.13862	N.S.	1.138	0.186	0.16755	Non-Target	NO	NO	NO	NO	NO	3UTR	Stop codon	1883, 2371	2371	0.426, 0.405	0.426	0.416
AT1G05040	B3H6T5, Q9ZVN8	AT1G05040		UBA-like domain protein	0.0594201	0	0.0906649	0	0	0	0.0500283	0	N.A.	N.A.	N.A.	N.A.	0	0	0.046098	0	0	0	0.015366	0	N.A.	N.A.	N.A.	N.A.	N.A.	NO	NO	NO	NO	NO	NO	NO	829, 996	996	0.389, 0.409	0.409	0.399
AT1G05055	Q0WLZ8, Q9ZVN9	GTF2H2	ATGTF2H2, GTF2H2	general transcription factor II H2	2.35095	1.97554	2.23268	1.84808	2.06826	1.93756	2.18639	1.9513	N.S.	0.844	-0.244	0.37508	3.09245	3.01294	3.07417	2.99932	2.91464	3.09527	3.05985	3.00308	1/1.5<=FC<=1.5	0.863	-0.212	0.00532	PERMISSIVE	NO	YES	YES	NO	NO	NO	NO	1597	1597	0.432	0.432	0.432
AT1G05060	Q9ZVP0	AT1G05060		coiled-coil protein	1.90033	1.86198	1.92364	2.01868	2.11064	2.0517	1.89532	2.06034	N.S.	1.211	0.276	0.34711	2.08366	2.18506	2.18861	2.52672	2.149	2.33509	2.15244	2.33694	N.S.	1.091	0.125	0.4177	Non-Target	NO	NO	NO	NO	3UTR	NO	NO	1029	1029	0.411	0.411	0.411
AT1G05065	A0A178W838, Q3EDI6	20	20	CLAVATA3/ESR-RELATED 20	0.167229	0.357211	0.448628	0.328076	0.817567	0.651608	0.324356	0.599084	N.S.	1.148	0.199	0.40686	0.44241	0.417739	0.387913	0.639502	0.49923	0	0.416021	0.379578	N.S.	1.086	0.119	0.49642	Non-Target	NO	NO	NO	NO	NO	NO	NO	717	717	0.329	0.329	0.329
AT1G05070	Q94AB8	AT1G05070		transmembrane protein, putative (DUF1068)	2.73104	2.13137	1.96147	2.14262	2.12041	2.20605	2.27463	2.15636	N.S.	0.923	-0.116	0.73026	3.35623	3.23229	3.42913	3.1386	2.98071	3.04011	3.33922	3.05314	1/1.5<=FC<=1.5	0.782	-0.354	5.8e-11	Non-Target	NO	NO	NO	3UTR	NO	3UTR	NO	991	991	0.436	0.436	0.436
AT1G05087	A0A178W341, A0A1P8AV47, A0A1P8AV76	AT1G05087		dentin sialophosphoprotein	1.46639	2.0626	1.52354	1.46282	1.27456	1.30607	1.68417	1.34782	N.S.	0.804	-0.315	0.35714	0.749608	0.700174	0.823608	1.34878	1.04389	0.997835	0.757797	1.13017	1/1.5<=FC<=1.5	1.313	0.393	0.00467	Non-Target	NO	NO	NO	NO	NO	NO	NO	946, 1060	1060	0.443, 0.429	0.443	0.436
AT1G05090	F4I793	AT1G05090		dentin sialophosphoprotein-like protein	1.97205	1.96733	1.6879	1.67074	1.59686	1.45077	1.87576	1.57279	N.S.	0.799	-0.323	0.26683	1.44356	0.788997	1.48528	1.35667	1.45767	1.70056	1.23928	1.50497	N.S.	0.996	-0.005	0.96438	Non-Target	NO	NO	NO	NO	NO	NO	NO	1514	1514	0.402	0.402	0.402
AT1G05100	Q9ZVP5	MAPKKK18	MAPKKK18	mitogen-activated protein kinase kinase kinase 18	4.9259	5.38322	5.35874	5.34087	5.13427	5.1816	5.22262	5.21891	N.S.	1.023	0.033	0.9189	1.4923	1.31062	1.33113	1.45018	1.42263	1.62369	1.37802	1.49883	N.S.	0.896	-0.158	0.15062	Non-Target	NO	NO	NO	NO	NO	NO	NO	1341	1341	0.453	0.453	0.453
AT1G05120	A0A178W5J4, A0A1P8AWF9	AT1G05120		Helicase protein with RING/U-box domain-containing protein	2.3629	2.21615	2.4667	2.3596	2.37745	2.46542	2.34858	2.40082	N.S.	1.102	0.14	0.57017	1.86067	1.71419	1.97722	2.04832	2.28877	2.42137	1.85069	2.25282	1/1.5<=FC<=1.5	1.242	0.313	0.00062	PERMISSIVE	NO	YES	NO	NO	NO	3UTR	Stop codon	2886, 2989	2989	0.418	0.418	0.418
AT1G05140	O23053	AT1G05140		Peptidase M50 family protein	1.27792	1.15219	1.15637	0.466385	0.950447	1.04536	1.19549	0.820731	N.S.	0.765	-0.386	0.27182	1.79083	1.95864	2.18603	2.07159	2.06893	1.92334	1.9785	2.02129	1/1.5<=FC<=1.5	0.854	-0.228	0.00467	Non-Target	NO	NO	NO	CDS	CDS, 3UTR	NO	NO	1514	1514	0.419	0.419	0.419
AT1G05150	O23052	AT1G05150		Calcium-binding tetratricopeptide family protein	3.23064	2.94954	2.98156	3.39989	3.09925	3.04746	3.05391	3.1822	N.S.	1.196	0.258	0.24818	2.80676	2.72302	2.88434	3.0581	3.08278	3.18002	2.8047	3.10697	N.S.	1.053	0.075	0.21715	Non-Target	NO	NO	NO	NO	3UTR	NO	NO	2894	2894	0.426	0.426	0.426
AT1G05160	O23051	CYP88A3	ATKAO1, CYP88A3, KAO1	cytochrome P450, family 88, subfamily A, polypeptide 3	1.82573	1.7992	1.6206	1.8175	1.53744	1.73237	1.74851	1.69577	N.S.	1.009	0.013	0.97063	1.2955	1.0577	1.24047	1.21936	1.51733	1.71876	1.19789	1.48515	1/1.5<=FC<=1.5	1.153	0.206	0.01969	Non-Target	NO	NO	NO	NO	NO	NO	NO	2069, 2136	2136	0.414, 0.411	0.414	0.412
AT1G05170	A0A2H1ZEA5, A8MRC7, A8MRC7-2	AT1G05170		Galactosyltransferase family protein	3.81408	3.70732	3.65149	3.641	3.81909	3.83088	3.7243	3.76366	N.S.	1.101	0.139	0.51237	2.80372	2.61506	2.45578	2.57159	2.39279	2.36016	2.62486	2.44151	1/1.5<=FC<=1.5	0.789	-0.342	0.00034	Non-Target	NO	NO	NO	NO	NO	NO	NO	2027, 2221	2221	0.409, 0.403	0.409	0.406
AT1G05180	C0Z261, F4I7A3, F4I7A4, P42744	AXR1	AXR1	NAD(P)-binding Rossmann-fold superfamily protein	3.30699	3.0715	3.18637	2.93347	2.98551	2.94494	3.18829	2.95464	N.S.	0.848	-0.237	0.225	3.38919	3.19158	3.37629	3.27446	3.1374	3.1508	3.31902	3.18755	1/1.5<=FC<=1.5	0.886	-0.175	0.00145	STRINGENT	3UTR,3UTR,3UTR	YES	YES	NO	3UTR	3UTR	Stop codon	1817, 1942, 2044	2044	0.417, 0.42, 0.407	0.42	0.415
AT1G05190	O23049	emb2394	EMB2394, RPL6	Ribosomal protein L6 family	1.48003	1.06624	0.990706	1.18984	0.813454	1.0897	1.17899	1.031	N.S.	0.925	-0.112	0.75389	3.06787	3.07463	3.07442	2.85164	2.99792	2.62382	3.07231	2.82446	DOWN	0.631	-0.664	6.5e-12	STRINGENT	3UTR	YES	YES	NO	3UTR	3UTR	NO	1051	1051	0.418	0.418	0.418
AT1G05200	A0A178W3A9, A0A1P8AP10, A0A1P8AP36, Q8GXJ4, Q8GXJ4-2	GLR3.4	ATGLR3.4, GLR3.4, GLUR3	glutamate receptor 3.4	0.607712	0.777113	0.957806	1.70421	1.22368	1.78058	0.780877	1.56949	UP	3.144	1.653	2e-05	0.409808	0.543352	1.03192	0.6761	0.80875	0.815774	0.661695	0.766875	1/1.5<=FC<=1.5	1.311	0.391	0.01496	Non-Target	NO	NO	NO	NO	3UTR	NO	NO	2249, 2321, 2765, 2781, 3261, 3305, 3388	3388	0.424, 0.42, 0.429, 0.425, 0.423, 0.427	0.429	0.425
AT1G05205	Q8LG56	AT1G05205		hexokinase-1 protein	5.24904	5.2792	5.17855	5.06693	5.33907	5.26295	5.2356	5.22298	N.S.	1.051	0.071	0.77286	5.64603	5.58555	5.42608	5.42452	5.33734	5.36766	5.55256	5.37651	1/1.5<=FC<=1.5	0.814	-0.297	0.02725	PERMISSIVE	NO	YES	YES	3UTR	NO	NO	Stop codon	617	617	0.415	0.415	0.415
AT1G05210	O23047	AT1G05210		Transmembrane protein 97, Putative	4.70097	4.36025	4.06644	3.18693	3.0373	3.33491	4.37589	3.18638	DOWN	0.324	-1.625	2e-10	4.06387	4.0532	3.98021	3.64467	3.63174	3.81218	4.03243	3.6962	DOWN	0.654	-0.613	2.9e-05	PERMISSIVE	NO	YES	YES	NO	NO	NO	NO	770	770	0.422	0.422	0.422
AT1G05220	O23046	AT1G05220		Transmembrane protein 97, Putative	2.39063	2.2366	2.01635	1.55889	2.03805	1.98054	2.21453	1.85916	N.S.	0.805	-0.313	0.34079	2.27872	2.37836	2.1903	2.37672	2.41728	2.48063	2.28246	2.42488	N.S.	0.925	-0.113	0.26797	Non-Target	NO	NO	NO	NO	NO	NO	NO	717	717	0.417	0.417	0.417
AT1G05230	A0A1P8AUV2, B3H6Y4, Q94C37	HDG2	HDG2	homeodomain GLABROUS 2	0.611969	0.531486	0.367974	0.342584	0.221154	0.431876	0.503809	0.331871	N.A.	N.A.	N.A.	N.A.	0.254972	0.345777	0.53946	0.668455	0.722073	0.956547	0.38007	0.782359	UP	1.715	0.778	8.9e-08	Non-Target	NO	NO	NO	3UTR	NO	NO	NO	2134, 2424, 2557, 2678, 2974, 2983, 3140, 3231, 3520, 3526, 3553, 3644	3644	0.436, 0.397, 0.435, 0.432, 0.405, 0.403, 0.458, 0.402, 0.404, 0.452, 0.455	0.458	0.424
AT1G05240	P0DI10	AT1G05240	PR9	Peroxidase superfamily protein	0.0383242	0	0.0586179	0	0	0.170756	0.032314	0.0569186	N.A.	N.A.	N.A.	N.A.	0.0518806	0	0	0	0.0242066	0	0.0172935	0.00806888	N.A.	N.A.	N.A.	N.A.	N.A.	NO	NO	NO	NO	NO	5UTR	NO	2478	2478	0.394	0.394	0.394
AT1G05250	A0A178WN68, P0DI10	AT1G05250	AtPRX1, PRX2	Peroxidase superfamily protein	5.1993	5.4168	5.67783	5.26096	5.58304	5.86495	5.43131	5.56965	N.S.	1.167	0.223	0.44956	4.25354	4.64601	4.94743	4.34363	4.25112	4.65779	4.61566	4.41751	1/1.5<=FC<=1.5	0.823	-0.28	0.03671	Non-Target	NO	NO	N.E.	NO	NO	NO	NO	1492	1492	0.438	0.438	0.438
AT1G05260	O23044	RCI3	RCI3, RCI3A	Peroxidase superfamily protein	6.3056	6.18911	6.20031	6.69709	6.56414	6.64215	6.23167	6.63446	UP	1.569	0.649	5e-06	5.99005	5.9288	5.92328	6.02543	5.97905	6.06644	5.94738	6.02364	N.S.	0.868	-0.205	0.16209	Non-Target	NO	NO	NO	NO	NO	NO	NO	1254	1254	0.43	0.43	0.43
AT1G05270	Q8GXY6	AT1G05270		TraB family protein	3.39035	3.35903	3.45479	3.15849	3.25021	3.27895	3.40139	3.22921	N.S.	0.904	-0.145	0.51085	3.41684	3.40192	3.57071	3.52138	3.47418	3.54647	3.46316	3.51401	N.S.	0.959	-0.061	0.12066	Non-Target	NO	NO	NO	NO	NO	NO	Stop codon	1743	1743	0.415	0.415	0.415
AT1G05280	A0A1P8AQE7, F4I8P5	AT1G05280		ERV-F (C)1 provirus ancestral Env polyprotein, putative (DUF604)	2.79684	2.58828	2.26961	1.6508	2.18701	2.32469	2.55158	2.05417	N.S.	0.702	-0.511	0.09729	2.43669	2.09707	2.26372	2.36342	2.59284	2.71155	2.26583	2.55594	1/1.5<=FC<=1.5	1.392	0.478	0.00338	PERMISSIVE	NO	YES	NO	NO	NO	NO	NO	1913, 2299	2299	0.423, 0.394	0.423	0.408
AT1G05300	F4I8P9, O23039	ZIP5	ZIP5	zinc transporter 5 precursor	1.86239	2.13688	1.91655	1.49605	1.65378	2.11884	1.97194	1.75622	N.S.	0.904	-0.146	0.66012	2.08003	2.26835	2.39778	2.56836	2.59745	2.82204	2.24872	2.66262	UP	1.541	0.624	5e-07	Non-Target	NO	NO	NO	NO	NO	NO	NO	1554, 1838	1838	0.427, 0.403	0.427	0.415
AT1G05310	O23038	AT1G05310		Pectin lyase-like superfamily protein	0.652729	0.450445	0.590503	0.412918	0.275968	0.448282	0.564559	0.379056	N.A.	N.A.	N.A.	N.A.	2.35229	2.46775	2.51895	2.41903	2.39959	2.48332	2.44633	2.43398	1/1.5<=FC<=1.5	0.764	-0.388	0.00059	Non-Target	NO	NO	NO	NO	NO	NO	NO	1447	1447	0.415	0.415	0.415
AT1G05320	A0A1P8AQX3, F4I8Q1, Q56WB1	AT1G05320		myosin heavy chain, embryonic smooth protein	3.21702	3.19671	3.07532	2.71108	2.72958	2.94892	3.16302	2.79653	1/1.5<=FC<=1.5	0.754	-0.408	0.0463	1.20231	1.19211	1.2275	1.27315	1.63594	1.66444	1.2073	1.52451	1/1.5<=FC<=1.5	1.267	0.341	0.02521	Non-Target	NO	NO	NO	NO	NO	3UTR	NO	2639, 2670, 2794, 2800, 2824, 2842, 2902, 2930, 3036	3036	0.382, 0.381, 0.383, 0.378, 0.374	0.383	0.379
AT1G05330	O23036	AT1G05330		hypothetical protein	1.6884	1.82426	1.64417	1.62741	1.52966	1.20062	1.71894	1.45256	N.S.	0.882	-0.181	0.59737	0.419923	0.0670828	0.0615042	0.298776	0.379564	0	0.182837	0.226113	N.A.	N.A.	N.A.	N.A.	N.A.	NO	NO	NO	NO	NO	NO	NO	688	688	0.385	0.385	0.385
AT1G05340	O23035	AT1G05340	AthCYSTM1	cysteine-rich TM module stress tolerance protein	6.33679	6.60346	6.88681	6.67523	7.13632	6.90335	6.60902	6.90497	N.S.	1.314	0.394	0.15645	3.5272	3.50878	3.49122	3.75928	3.46107	2.85431	3.50907	3.35822	1/1.5<=FC<=1.5	0.797	-0.328	0.04191	Non-Target	NO	NO	NO	NO	NO	NO	NO	791	791	0.357	0.357	0.357
AT1G05350	O23034	AT1G05350		NAD(P)-binding Rossmann-fold superfamily protein	4.33253	4.04679	3.86096	3.48866	3.32718	3.41254	4.08009	3.40946	DOWN	0.551	-0.859	1.5e-05	3.29399	3.17499	3.28359	2.91135	2.75202	2.78251	3.25086	2.81529	DOWN	0.663	-0.592	< 2e-16	PERMISSIVE	NO	YES	YES	NO	3UTR	3UTR	Stop codon	1913	1913	0.424	0.424	0.424
AT1G05360	C0Z3L0, F4I8Q7	KMS2	KMS2	vacuole membrane-like protein	3.1229	2.7221	2.84701	2.64581	2.37854	2.48859	2.89734	2.50432	1/1.5<=FC<=1.5	0.73	-0.454	0.04651	2.65605	2.45375	2.56479	2.35905	2.31691	2.00626	2.5582	2.22741	1/1.5<=FC<=1.5	0.755	-0.406	3.9e-08	PERMISSIVE	NO	YES	NO	NO	NO	NO	NO	1763, 1990, 2271	2271	0.4, 0.386, 0.389	0.4	0.392
AT1G05370	F4I8Q8	AT1G05370		Sec14p-like phosphatidylinositol transfer family protein	0	0	0.0500741	0.0900765	0	0	0.0166914	0.0300255	N.A.	N.A.	N.A.	N.A.	0.155689	0.181132	0.385348	0.356775	0.352322	0.320381	0.240723	0.343159	N.S.	1.013	0.018	0.92332	Non-Target	NO	NO	NO	NO	NO	NO	NO	1714	1714	0.424	0.424	0.424
AT1G05380	Q7Y221, Q9ZW00	AT1G05380		Acyl-CoA N-acyltransferase with RING/FYVE/PHD-type zinc finger protein	2.13175	1.93731	2.05939	2.22403	2.23427	2.11813	2.04282	2.19214	N.S.	1.23	0.298	0.13968	1.93624	1.77619	2.18114	2.37375	2.60945	2.78655	1.96452	2.58992	1/1.5<=FC<=1.5	1.415	0.501	1e-12	Non-Target	NO	NO	NO	NO	3UTR	NO	NO	4173, 4229, 4244	4244	0.424, 0.426	0.426	0.425
AT1G05385	A0A1P8ASY3, Q9ZVZ9	LPA19	LPA19, Psb27-H1	photosystem II 11 kDa protein-like protein	0.781247	1.06557	1.04667	0.914901	1.17895	1.35664	0.964498	1.15016	N.S.	1.15	0.201	0.54421	1.23533	1.3553	1.4954	1.37355	1.56151	1.13168	1.36201	1.35558	N.S.	0.934	-0.099	0.49923	PERMISSIVE	NO	YES	NO	NO	NO	NO	NO	696, 788	788	0.385, 0.405	0.405	0.395
AT1G05400	Q5XVL8, Q9LR50	AT1G05400		hypothetical protein	0.853083	0.561751	0.673729	1.33033	1.23567	0.957998	0.696188	1.17467	N.S.	1.722	0.784	0.07254	0.516868	0.466985	0.436709	0.696269	0.633953	0.81112	0.473521	0.713781	1/1.5<=FC<=1.5	1.309	0.389	0.02105	Non-Target	NO	NO	NO	NO	NO	NO	NO	962, 996	996	0.439, 0.44	0.44	0.44
AT1G05410	B9DGV7, Q8VZE5	AT1G05410		CDPK adapter, putative (DUF1423)	1.99076	1.54275	1.68548	1.02527	1.21584	1.41857	1.73967	1.21989	DOWN	0.607	-0.72	0.02939	2.68012	2.57832	2.67603	2.56238	2.32006	2.25671	2.64482	2.37972	1/1.5<=FC<=1.5	0.67	-0.579	< 2e-16	Non-Target	NO	NO	NO	NO	NO	NO	NO	1657, 1758	1758	0.427, 0.428	0.428	0.428
AT1G05420	A0A1P8AWY8, F4I8R6	OFP12	ATOFP12, OFP12	ovate family protein 12	1.68011	1.78456	1.80038	1.6266	1.96353	2.19616	1.75502	1.92876	N.S.	1.217	0.283	0.38517	1.04114	0.769709	1.16824	0.976415	1.09946	1.51236	0.99303	1.19608	N.S.	1.004	0.006	0.97362	Non-Target	NO	NO	NO	NO	NO	NO	NO	961, 1040	1040	0.444, 0.456	0.456	0.45
AT1G05430	Q8LC42	AT1G05430		hypothetical protein	3.06433	2.84199	3.0005	2.8119	2.81243	2.94748	2.96894	2.85727	N.S.	0.953	-0.069	0.79754	3.22327	2.83728	3.30315	3.06476	2.97373	2.64464	3.12123	2.89438	1/1.5<=FC<=1.5	0.803	-0.317	6.2e-05	Non-Target	NO	NO	NO	NO	3UTR	3UTR	NO	1176	1176	0.412	0.412	0.412
AT1G05440	Q5Q0I8, Q9ZVZ4	AT1G05440		C-8 sterol isomerase	0.192433	0.0804835	0	0	0	0	0.0909721	0	N.A.	N.A.	N.A.	N.A.	1.04719	0.969727	1.17358	0.920946	1.01558	1.05999	1.0635	0.998837	1/1.5<=FC<=1.5	0.763	-0.39	0.00192	Non-Target	NO	NO	NO	NO	NO	NO	NO	1619	1619	0.41	0.41	0.41
AT1G05450	Q1G2Y5, Q8LBJ6	AT1G05450		Bifunctional inhibitor/lipid-transfer protein/seed storage 2S albumin superfamily protein	0.194206	0	0.226753	0.0966901	0.279872	0.283679	0.14032	0.22008	N.A.	N.A.	N.A.	N.A.	1.77503	1.89286	1.32106	2.19228	2.49927	2.56631	1.66298	2.41929	1/1.5<=FC<=1.5	1.393	0.478	0.01465	Non-Target	NO	NO	NO	NO	NO	NO	NO	464, 874	874	0.418, 0.414	0.418	0.416
AT1G05460	A0A1P8AMM9, Q8GYD9	SDE3	SDE3	P-loop containing nucleoside triphosphate hydrolases superfamily protein	0.528946	0.174972	0.369727	0.660744	0.551147	0.231213	0.357882	0.481035	N.A.	N.A.	N.A.	N.A.	1.09611	1.05923	1.21633	1.18133	1.39661	1.27375	1.12389	1.28389	N.S.	1.076	0.105	0.21696	Non-Target	NO	NO	NO	NO	NO	NO	Stop codon	2926, 3382	3382	0.424, 0.43	0.43	0.427
AT1G05470	Q9LR47, Q9LR47-2	CVP2	CVP2	DNAse I-like superfamily protein	0.716859	0.756983	0.796146	1.0993	1.03667	0.764369	0.756663	0.96678	N.S.	1.377	0.461	0.16192	0.797667	0.698411	0.991731	0.889885	0.978345	1.04412	0.829269	0.970784	N.S.	1.073	0.102	0.50921	Non-Target	NO	NO	NO	NO	NO	NO	NO	2988, 3518	3518	0.412, 0.402	0.412	0.407
AT1G05490	F4I8S3	chr31	chr31, CLSY3	chromatin remodeling 31	0.358932	0.238887	0.17623	0.467361	0.516627	0.537038	0.258016	0.507009	N.A.	N.A.	N.A.	N.A.	0.156253	0.109062	0.161002	0.306683	0.218564	0.312396	0.142105	0.279214	N.A.	N.A.	N.A.	N.A.	N.A.	NO	NO	NO	NO	NO	NO	NO	4735	4735	0.421	0.421	0.421
AT1G05500	A0A1P8APH4, Q8L706	NTMC2T2.1	ATSYTE, NTMC2T2.1, NTMC2TYPE2.1, SYT5, SYTE	Calcium-dependent lipid-binding (CaLB domain) family protein	4.3826	4.2752	4.25538	3.94901	3.90689	3.90461	4.3044	3.92017	1/1.5<=FC<=1.5	0.735	-0.444	0.00331	3.71365	3.81768	3.8918	3.86726	3.87748	3.88147	3.80771	3.8754	1/1.5<=FC<=1.5	0.888	-0.171	0.01049	PERMISSIVE	NO	YES	YES	3UTR	3UTR	3UTR	3' UTR	1793, 2211	2211	0.42, 0.424	0.424	0.422
AT1G05510	Q9ZVY7	AT1G05510	OBAP1a	naphthalene 1,2-dioxygenase subunit alpha (DUF1264)	0.694245	0.463786	0.176856	0.163164	0.315944	0.320501	0.444962	0.266537	N.S.	0.908	-0.139	0.57595	0	0.0397792	0	0.510785	1.26245	0	0.0132597	0.591078	UP	17.514	4.13	0.03539	N.A.	NO	NO	NO	NO	NO	NO	NO	980	980	0.446	0.446	0.446
AT1G05520	Q8H0S3	AT1G05520	AtSEC23B	Sec23/Sec24 protein transport family protein	3.43322	3.07493	2.83394	2.83966	2.76154	2.71475	3.11403	2.77199	N.S.	0.763	-0.391	0.09501	3.29509	3.23903	3.35545	3.35499	3.66693	3.86707	3.29653	3.62967	1/1.5<=FC<=1.5	1.206	0.271	0.00338	PERMISSIVE	NO	YES	YES	3UTR	3UTR	3UTR	NO	2944	2944	0.428	0.428	0.428
AT1G05530	Q9ZVY5	UGT75B2	UGT2, UGT75B2	UDP-glucosyl transferase 75B2	3.58956	3.03808	2.59655	3.35748	3.31063	3.21968	3.07473	3.29593	N.S.	1.182	0.241	0.42678	2.27822	2.34266	2.48179	2.61384	2.66957	2.80478	2.36756	2.69606	N.S.	1.103	0.141	0.36889	Non-Target	NO	NO	NO	NO	NO	NO	NO	1666	1666	0.437	0.437	0.437
AT1G05540	A0A384LIC6, Q9ZVY4	AT1G05540		hypothetical protein (DUF295)	0.731869	0.523575	0.414442	0.258065	0.220805	0.653032	0.556629	0.377301	N.S.	0.902	-0.149	0.62087	0.498974	0.551687	0.499278	0.548272	0.631298	1.07433	0.516646	0.7513	N.S.	1.034	0.048	0.7891	Non-Target	NO	NO	NO	3UTR	NO	NO	NO	1401, 1472	1472	0.434, 0.435	0.435	0.434
AT1G05550	F4I8S9, F4I8T0, F4I8T1	AT1G05550		hypothetical protein (DUF295)	0.0352716	0	0	0	0	0	0.0117572	0	N.A.	N.A.	N.A.	N.A.	0	0	0	0	0.023904	0	0	0.007968	N.A.	N.A.	N.A.	N.A.	N.A.	NO	NO	NO	NO	NO	NO	NO	855, 1267, 1333, 1597	1597	0.439, 0.453, 0.441, 0.449	0.453	0.446
AT1G05560	A0A1P8AP70, Q9LR44	UGT75B1	UGT1, UGT75B1	UDP-glucosyltransferase 75B1	4.54988	4.82205	4.71053	5.3524	6.3258	5.73365	4.69415	5.80395	UP	3.244	1.698	3.2e-07	3.09617	3.14858	3.02031	3.49449	3.54631	3.57161	3.08835	3.53747	UP	1.523	0.607	0.0236	Non-Target	NO	NO	NO	NO	NO	NO	NO	1650, 2136	2136	0.42, 0.438	0.438	0.429
AT1G05570	F4I8T3, Q9AUE0	CALS1	ATGSL06, ATGSL6, CALS1, GSL06, GSL6	callose synthase 1	0.812626	0.418319	0.61808	0.791684	0.865235	0.76812	0.616342	0.808346	N.S.	1.356	0.439	0.16023	2.49022	2.47489	3.02151	3.18006	3.44976	3.49101	2.66221	3.37361	1/1.5<=FC<=1.5	1.391	0.476	1.3e-05	PERMISSIVE	NO	YES	NO	NO	NO	NO	NO	6108, 6272, 6453, 6536	6536	0.42, 0.422, 0.421, 0.426	0.426	0.422
AT1G05575	Q8LC91	AT1G05575		transmembrane protein	2.19899	1.98811	2.11729	3.10724	3.39191	3.46765	2.10147	3.32227	UP	3.801	1.926	2.1e-11	2.87671	2.54345	2.86532	2.85508	2.79411	2.52845	2.76183	2.72588	N.S.	0.916	-0.126	0.19008	Non-Target	NO	NO	NO	NO	NO	NO	NO	710	710	0.376	0.376	0.376
AT1G05580	Q8VYD4, Q8VYD4-2	CHX23	ATCHX23, CHX23	cation/H exchanger 23	0.0374384	0	0.0846132	0	0	0	0.0406838	0	N.A.	N.A.	N.A.	N.A.	N.E.	N.E.	N.E.	N.E.	N.E.	N.E.	N.E.	N.E.	N.E.	N.E.	N.E.	N.E.	N.A.	NO	NO	NO	NO	NO	NO	NO	2879, 2972	2972	0.46, 0.468	0.468	0.464
AT1G05590	Q9SYK0	HEXO2	ATHEX3, HEXO2	beta-hexosaminidase 2	2.32389	1.97253	1.46572	1.05572	1.04528	0.977268	1.92072	1.02609	DOWN	0.342	-1.546	2.9e-05	2.00878	2.11945	2.09413	2.03584	2.13386	2.1221	2.07412	2.09726	1/1.5<=FC<=1.5	0.809	-0.305	0.00057	Non-Target	NO	NO	NO	NO	NO	NO	NO	2157, 2305, 2480	2480	0.422, 0.427, 0.418	0.427	0.422
AT1G05600	Q9SYK1	EMB3101	EMB3101	Tetratricopeptide repeat (TPR)-like superfamily protein	0.418427	0.343911	0.237199	0.238136	0.242913	0.0675755	0.333179	0.182875	N.A.	N.A.	N.A.	N.A.	1.15421	1.05855	1.23857	1.29991	1.43135	1.15097	1.15045	1.29408	N.S.	1.015	0.022	0.84543	Non-Target	NO	NO	NO	NO	NO	NO	NO	1650, 1671, 1795	1795	0.408, 0.416, 0.417	0.417	0.414
AT1G05610	A0A1P8ATP5, F4I8U2	APS2	APS2	ADP-glucose pyrophosphorylase small subunit 2	0.0350582	0	0	0	0	0	0.0116861	0	N.A.	N.A.	N.A.	N.A.	0.276432	0.140018	0.271845	0.241035	0.324892	0.267716	0.229432	0.277881	N.A.	N.A.	N.A.	N.A.	N.A.	NO	NO	NO	NO	NO	NO	NO	1606, 1608	1608	0.403, 0.402	0.403	0.402
AT1G05620	Q8LAC4, Q8LAC4-2	URH2	NSH2, URH2	uridine-ribohydrolase 2	4.5848	4.22542	4.06548	4.49501	4.43132	4.53646	4.2919	4.48759	N.S.	1.244	0.315	0.14354	4.33167	4.22685	4.40267	4.45286	4.49885	4.46432	4.3204	4.47201	N.S.	1.003	0.005	0.97135	PERMISSIVE	NO	NO	YES	NO	NO	NO	NO	1295, 1557	1557	0.398, 0.401	0.401	0.4
AT1G05630	A0A178WMF7, A0A178WNH1, A0A178WPL8, A0A1P8AU01, Q9SYK4, Q9SYK4-2	5PTASE13	5PTASE13, AT5PTASE13	Endonuclease/exonuclease/phosphatase family protein	1.8191	1.93174	1.89288	1.69496	1.56426	1.42425	1.88124	1.56116	N.S.	0.763	-0.389	0.1103	1.3375	1.0722	1.39893	1.23882	1.32558	1.29906	1.26954	1.28782	N.S.	0.928	-0.108	0.09851	Non-Target	NO	NO	NO	NO	NO	NO	NO	3825, 3875, 3982	3982	0.462	0.462	0.462
AT1G05640	Q9SYK5	AT1G05640		Ankyrin repeat family protein	0.979971	0.373879	0.529125	0.363427	0.507137	0.542223	0.627658	0.470929	N.S.	0.857	-0.222	0.51024	0.896637	1.06841	0.900896	1.06537	1.24786	0.982337	0.955315	1.09852	N.S.	1.101	0.139	0.18437	Non-Target	NO	NO	NO	NO	NO	NO	NO	2338	2338	0.424	0.424	0.424
AT1G05650	Q9SYK6	AT1G05650		Pectin lyase-like superfamily protein	3.61967	3.76318	3.76035	2.37575	2.93324	2.91248	3.7144	2.74049	DOWN	0.422	-1.246	7.3e-06	3.93327	3.60014	3.8821	3.54476	3.50204	3.6003	3.80517	3.54903	N.S.	0.826	-0.276	0.13558	Non-Target	NO	NO	NO	NO	NO	NO	NO	1500	1500	0.445	0.445	0.445
AT1G05660	Q9SYK7	AT1G05660		Pectin lyase-like superfamily protein	5.82236	5.84959	5.38762	4.47317	4.41884	4.78548	5.68652	4.55916	DOWN	0.356	-1.489	5.7e-10	4.2391	4.07405	4.22194	4.00606	3.92553	3.90399	4.17836	3.94519	1/1.5<=FC<=1.5	0.689	-0.538	0.00941	Non-Target	NO	NO	NO	NO	NO	3UTR	NO	1534	1534	0.447	0.447	0.447
AT1G05670	Q0WVK7	AT1G05670		Pentatricopeptide repeat (PPR-like) superfamily protein	0.664925	0.41505	0.266643	0.269173	0.467158	0.362858	0.448873	0.366396	N.A.	N.A.	N.A.	N.A.	0.515959	0.435142	0.638227	0.594743	0.709066	0.64904	0.529776	0.650949	1/1.5<=FC<=1.5	1.197	0.259	0.04533	Non-Target	NO	NO	NO	NO	NO	NO	NO	3256, 3273, 3373	3373	0.395	0.395	0.395
AT1G05675	P0C7P7	AT1G05675		UDP-Glycosyltransferase superfamily protein	0.433313	0.550937	0.261576	0.714679	1.34583	0.701527	0.415275	0.920679	UP	2.363	1.241	0.02395	0.0486149	0.191602	0.245184	0.189315	0.312994	0	0.1618	0.167436	N.A.	N.A.	N.A.	N.A.	Non-Target	NO	NO	NO	NO	NO	NO	NO	1493	1493	0.428	0.428	0.428
AT1G05680	Q9SYK9	UGT74E2	UGT74E2	Uridine diphosphate glycosyltransferase 74E2	4.41985	4.80058	4.72813	4.9823	5.80761	5.33365	4.64952	5.37452	UP	2.104	1.073	0.00065	3.96441	4.07453	4.14178	4.79731	4.88909	4.87708	4.06024	4.8545	UP	2.17	1.118	0.00058	Non-Target	NO	NO	NO	NO	NO	NO	NO	1755	1755	0.424	0.424	0.424
AT1G05690	Q9SYL0, Q9SYL0-2	BT3	BT3	BTB and TAZ domain protein 3	0.929239	1.13959	1.087	0.745372	1.00117	1.01192	1.05195	0.919489	N.S.	0.923	-0.115	0.74282	0.409921	0.56041	0.500077	0.542125	0.490298	0.421473	0.490136	0.484632	N.S.	1.059	0.082	0.61733	Non-Target	NO	NO	NO	NO	NO	NO	NO	1948	1948	0.401	0.401	0.401
AT1G05700	A0A1P8AQG2, C0LGD6	AT1G05700		Leucine-rich repeat transmembrane protein kinase protein	0.108318	0.166353	0.0571768	0.150287	0.264412	0.238523	0.110616	0.217741	N.A.	N.A.	N.A.	N.A.	0.373193	0.594037	0.768807	0.940421	1.39301	1.43637	0.578679	1.2566	UP	1.984	0.988	1.3e-06	Non-Target	NO	NO	NO	NO	NO	NO	NO	2880, 2944	2944	0.413, 0.411	0.413	0.412
AT1G05710	A0A178W9Z7, A0A1P8AVJ7, A0A1P8AVK1, Q7XJU2, Q7XJU2-2	AT1G05710		basic helix-loop-helix (bHLH) DNA-binding superfamily protein	1.91397	1.98618	1.63047	2.04089	2.04792	2.3307	1.84354	2.13984	N.S.	1.376	0.461	0.12278	2.62944	2.58763	2.3624	2.62845	2.40118	2.21883	2.52649	2.41615	N.S.	0.854	-0.228	0.07111	Non-Target	NO	NO	NO	NO	NO	NO	NO	886, 1179, 1183, 1270, 1279, 1286, 1352, 1503, 1737, 1924, 1946, 1991, 2039, 2105	2105	0.4, 0.399, 0.383, 0.387, 0.406, 0.381, 0.382, 0.41, 0.391, 0.415	0.415	0.393
AT1G05720	Q8GWP6, Q9SYL3	AT1G05720		selenoprotein family protein	4.6337	4.27126	4.16854	4.00283	3.86127	3.94404	4.35783	3.93605	1/1.5<=FC<=1.5	0.715	-0.483	0.02177	4.2787	4.27854	4.21637	4.11856	4.09223	3.94914	4.25787	4.05331	1/1.5<=FC<=1.5	0.753	-0.409	6.5e-08	PERMISSIVE	NO	YES	YES	NO	3UTR	NO	Stop codon	840	840	0.41	0.41	0.41
AT1G05730	A0A1P8AV61, Q5BQ23	AT1G05730		FAM136A-like protein (DUF842)	0.403372	0.0960027	0.125594	0.753401	0.294925	0.302119	0.208323	0.450149	N.S.	1.184	0.244	0.34852	1.75285	1.75377	1.78132	1.64442	1.60055	1.42358	1.76265	1.55618	N.S.	0.946	-0.08	0.59433	Non-Target	NO	NO	NO	NO	NO	NO	NO	678, 1430	1430	0.404, 0.394	0.404	0.399
AT1G05740	Q9SYL5	AT1G05740		FAM136A-like protein (DUF842)	0	0	0.196507	0	0.24374	0.445302	0.0655024	0.229681	N.A.	N.A.	N.A.	N.A.	N.E.	N.E.	N.E.	N.E.	N.E.	N.E.	N.E.	N.E.	N.E.	N.E.	N.E.	N.E.	N.A.	NO	NO	NO	NO	NO	NO	NO	519	519	0.43	0.43	0.43
AT1G05750	Q9MA50	PDE247	CLB19, PDE247	Tetratricopeptide repeat (TPR)-like superfamily protein	0.252897	0.215852	0.18971	0.215044	0.282358	0.166113	0.219486	0.221172	N.A.	N.A.	N.A.	N.A.	0.699347	0.792453	0.733157	0.773972	0.87565	0.978696	0.741652	0.876106	N.S.	1.053	0.075	0.40998	Non-Target	NO	NO	NO	NO	NO	NO	NO	2713, 3226	3226	0.422, 0.411	0.422	0.416
AT1G05760	A0A1P8APH7, D5K201, D5K204, D9UBI3, Q9SE37	RTM1	RTM1	Mannose-binding lectin superfamily protein	0	0	0	0	0	0.282002	0	0.0940008	N.A.	N.A.	N.A.	N.A.	2.80032	2.41106	2.57653	2.53486	2.22308	2.67619	2.59597	2.47804	1/1.5<=FC<=1.5	0.758	-0.4	0.00021	Non-Target	NO	NO	NO	NO	NO	NO	NO	658, 682	682	0.416, 0.406	0.416	0.411
AT1G05770	Q9MA49	AT1G05770		Mannose-binding lectin superfamily protein	0	0	0	0.208084	0	0	0	0.0693612	N.A.	N.A.	N.A.	N.A.	1.69535	1.48727	1.69769	1.69608	1.33736	1.1356	1.62677	1.38968	1/1.5<=FC<=1.5	0.725	-0.464	0.00018	Non-Target	NO	NO	NO	NO	NO	NO	NO	785	785	0.392	0.392	0.392
AT1G05780	A0A178WLF0, Q58G56	AT1G05780		Vacuolar ATPase assembly integral membrane protein VMA21-like domain-containing protein	3.26333	2.85812	2.76259	2.44227	2.56003	2.35181	2.96135	2.45137	DOWN	0.654	-0.612	0.02477	2.68843	2.40766	2.49594	2.36864	2.23347	2.15607	2.53068	2.25273	N.S.	0.97	-0.044	0.69499	Non-Target	NO	NO	NO	NO	NO	NO	NO	864	864	0.397	0.397	0.397
AT1G05783	A0A1P8AQA7	AT1G05783		hypothetical protein	0	0	0	0.167932	0	0	0	0.0559773	N.A.	N.A.	N.A.	N.A.	0.292276	0.189553	0.390939	0	0.296303	0.498013	0.290923	0.264772	N.S.	1.011	0.016	0.92933	N.A.	NO	NO	NO	NO	NO	NO	NO	550	550	0.385	0.385	0.385
AT1G05785	A0A1P8AP49, A0A1P8AP61, A0A1P8AP81, Q8GWH4	AT1G05785		Got1/Sft2-like vescicle transport protein family	3.95989	3.88228	3.71844	3.18526	3.37815	3.53981	3.85354	3.36774	1/1.5<=FC<=1.5	0.686	-0.545	0.01771	3.56964	3.47851	3.53003	3.29525	3.28982	3.26393	3.52606	3.283	1/1.5<=FC<=1.5	0.763	-0.389	6.3e-07	Non-Target	NO	NO	NO	3UTR	NO	NO	NO	620, 772, 808, 970, 1055, 1061, 1397	1397	0.382, 0.4, 0.394, 0.393, 0.395, 0.367, 0.424	0.424	0.394
AT1G05790	A0A1P8AU29, A0A1P8AU43, A8MRJ1, Q0WQ61	AT1G05790		lipase class 3 family protein	2.45358	2.44564	2.45013	2.09927	2.07438	2.07293	2.44978	2.08219	1/1.5<=FC<=1.5	0.734	-0.446	0.02939	1.64622	1.62268	1.85951	1.84031	1.79198	1.82517	1.70947	1.81915	N.S.	1.009	0.013	0.89167	PERMISSIVE	NO	YES	YES	3UTR	NO	NO	NO	2184, 2448, 2605, 2614	2614	0.431, 0.434, 0.433, 0.435	0.435	0.433
AT1G05805	A0A178W7Y3, A0A178W8T0, Q8H102	AT1G05805	AKS2	basic helix-loop-helix (bHLH) DNA-binding superfamily protein	3.12984	2.72825	2.45957	1.93375	1.96637	1.9542	2.77255	1.95144	DOWN	0.444	-1.172	1.8e-05	2.68186	2.61695	2.95922	2.68283	2.94469	2.88206	2.75267	2.83653	N.S.	1.046	0.065	0.42514	Non-Target	NO	NO	NO	NO	3UTR	3UTR	NO	1795	1795	0.423	0.423	0.423
AT1G05810	A0A178WE25, A0A1P8AVC8, P19892	RABA5E	ARA, ARA-1, ATRAB11D, ATRABA5E, RABA5E	Rab GTPase-like A5A protein	4.56891	4.60606	4.57962	4.14081	3.98482	4.25385	4.58486	4.12649	1/1.5<=FC<=1.5	0.696	-0.522	0.00737	3.89243	3.68627	3.86099	3.59658	3.32676	3.43885	3.81323	3.45406	DOWN	0.58	-0.785	< 2e-16	PERMISSIVE	NO	YES	YES	3UTR	NO	NO	NO	657, 1017	1017	0.437, 0.482	0.482	0.46
AT1G05820	A0A1P8AWA1, A0A1P8AWF6, B3H5D5, Q9MA44	SPPL5	ATSPPL5, SPPL5	SIGNAL PEPTIDE PEPTIDASE-LIKE 5	1.50952	1.45287	1.31922	1.3957	1.19176	1.14574	1.4272	1.2444	N.S.	0.888	-0.171	0.58204	0.433465	0.396708	0.242859	0.330819	0.551481	0.456382	0.357677	0.446227	1/1.5<=FC<=1.5	1.254	0.326	0.03054	Non-Target	NO	NO	NO	NO	NO	NO	NO	1648, 2041, 2178, 2471	2471	0.4, 0.395, 0.412, 0.399	0.412	0.402
AT1G05830	P0CB22	ATX2	ATX2, SDG30	trithorax-like protein 2	1.65625	1.44244	1.41886	1.7067	1.66106	1.54341	1.50585	1.63706	N.S.	1.214	0.279	0.24291	1.22869	1.02564	1.37027	1.37308	1.7164	1.73156	1.2082	1.60701	1/1.5<=FC<=1.5	1.376	0.461	0.00015	Non-Target	NO	NO	NO	3UTR	3UTR	NO	NO	3799, 3983, 4094, 4166	4166	0.424, 0.426, 0.427, 0.431	0.431	0.427
AT1G05835	A8MS78	AT1G05835		PHD finger protein	2.09242	1.45505	1.3096	1.80768	1.80513	1.20702	1.61902	1.60661	N.S.	1.008	0.012	0.97609	2.55367	2.36548	2.20894	2.08879	2.31216	1.87183	2.37603	2.09093	DOWN	0.665	-0.588	0.00052	Non-Target	NO	NO	NO	NO	NO	NO	NO	599	599	0.429	0.429	0.429
AT1G05840	A0A178W5A5, F4IAD5	AT1G05840		Eukaryotic aspartyl protease family protein	2.94812	2.72712	2.84549	2.8228	2.70023	2.7649	2.84024	2.76264	N.S.	0.983	-0.024	0.92625	2.37004	2.24415	2.60627	2.59585	2.63752	2.75475	2.40682	2.66271	N.S.	0.958	-0.062	0.60474	PERMISSIVE	NO	YES	NO	CDS	NO	3UTR, CDS	NO	1700	1700	0.427	0.427	0.427
AT1G05850	Q9MA41	POM1	ATCTL1, CTL1, ELP, ELP1, ERH2, HOT2, POM1	Chitinase family protein	6.39161	6.26494	6.2889	5.89336	5.68987	5.87385	6.31515	5.81903	DOWN	0.666	-0.586	0.00021	6.10724	6.07164	6.22444	6.17741	6.16364	6.27728	6.13444	6.20611	1/1.5<=FC<=1.5	0.89	-0.169	0.00338	STRINGENT	3UTR,3UTR	YES	NO	NO	3UTR	3UTR, CDS	Stop codon	1620, 1905	1905	0.415, 0.433	0.433	0.424
AT1G05860	A0A1P8AVI7, Q9MA40	AT1G05860		INO80 complex subunit D-like protein	2.28695	2.37113	2.18802	2.86559	2.5476	2.44811	2.28203	2.62044	1/1.5<=FC<=1.5	1.476	0.562	0.0294	2.04551	2.0336	2.02749	2.28231	2.46321	2.23306	2.03553	2.32619	1/1.5<=FC<=1.5	1.107	0.147	0.0098	Non-Target	NO	NO	NO	NO	NO	NO	NO	842, 1375, 1855	1855	0.405, 0.418, 0.433	0.433	0.419
AT1G05870	Q8GXS7, Q9MA39	AT1G05870		hypothetical protein (DUF1685)	3.15836	3.09684	2.92001	3.10694	3.22949	3.17553	3.0584	3.17065	N.S.	1.171	0.227	0.29892	3.12439	2.90621	3.03089	3.3077	3.22279	3.16762	3.0205	3.2327	1/1.5<=FC<=1.5	1.144	0.194	0.00752	Non-Target	NO	NO	NO	NO	NO	NO	NO	1117, 1284, 1424, 1431, 1485, 1518, 1575, 1620, 1652, 1653, 1710, 1787	1787	0.411, 0.409, 0.414, 0.407, 0.423, 0.415, 0.419, 0.413, 0.418, 0.44, 0.427	0.44	0.417
AT1G05880	A0A1P8AVA0, Q84RQ9, Q84RQ9-2	ARI12	ARI12, ATARI12	RING/U-box superfamily protein	0	0	0.0982975	0.0463119	0	0	0.0327658	0.0154373	N.A.	N.A.	N.A.	N.A.	0	0	0.0177731	0.0495071	0	0	0.00592437	0.0165024	N.A.	N.A.	N.A.	N.A.	N.A.	NO	NO	NO	NO	NO	NO	NO	1705, 1726, 1827	1827	0.402, 0.392	0.402	0.399
AT1G05890	A0A178W7Q7, A0A178W9R0, F4IAE4, Q8L829	ARI5	ARI5, ATARI5	RING/U-box superfamily protein	2.82916	2.73747	2.96971	2.94284	2.88856	2.90648	2.84545	2.91263	N.S.	1.116	0.159	0.48815	2.94174	2.83535	3.05482	3.14409	3.09386	3.29315	2.94397	3.17703	N.S.	0.931	-0.103	0.44438	PERMISSIVE	NO	YES	NO	3UTR	3UTR	3UTR, CDS	3' UTR	2421, 2496	2496	0.42, 0.422	0.422	0.421
AT1G05894	Q9MA36	AT1G05894		hypothetical protein	0.501496	0.293944	0.82496	0.94987	0.693942	0.805113	0.540134	0.816308	N.S.	1.283	0.36	0.30375	0.109034	0.0214836	0.094296	0.0271929	0.0927679	0.128912	0.0749378	0.0829576	N.A.	N.A.	N.A.	N.A.	N.A.	NO	NO	NO	NO	NO	NO	NO	1591	1591	0.397	0.397	0.397
AT1G05900	B9DFZ0, B9DFZ0-2	NTH2	ATNTH2, NTH2	endonuclease III 2	1.85782	1.75245	1.66494	1.72958	1.698	1.79595	1.7584	1.74118	N.S.	1.032	0.046	0.89103	1.39876	1.26792	1.31807	1.37772	1.45963	1.34867	1.32825	1.39534	N.S.	1.036	0.051	0.71506	Non-Target	NO	NO	NO	3UTR	NO	5UTR, 3UTR	NO	1443, 1548	1548	0.41	0.41	0.41
AT1G05910	F4IAE9	AT1G05910	BRAT1	cell division cycle protein 48-related / CDC48-like protein	1.42337	1.38763	1.32493	1.38534	1.36413	1.13779	1.37864	1.29575	N.S.	0.972	-0.041	0.89677	1.86427	1.85168	2.16922	2.18498	2.30223	2.48231	1.96172	2.32318	1/1.5<=FC<=1.5	1.231	0.3	7.3e-07	PERMISSIVE	NO	YES	NO	3UTR	NO	NO	CDS	4018	4018	0.444	0.444	0.444
AT1G05920	Q5RM09	AT1G05920		B3 domain protein (DUF313)	0.0383867	0	0.11425	0.1053	0	0	0.0508788	0.0351	N.A.	N.A.	N.A.	N.A.	N.E.	N.E.	N.E.	N.E.	N.E.	N.E.	N.E.	N.E.	N.E.	N.E.	N.E.	N.E.	N.A.	NO	NO	NO	NO	NO	NO	NO	1477	1477	0.417	0.417	0.417
AT1G05930	Q9MA32	AT1G05930		B3 domain protein (DUF313)	0	0	0.094841	0.087212	0.119875	0	0.0316137	0.069029	N.A.	N.A.	N.A.	N.A.	N.E.	N.E.	N.E.	N.E.	N.E.	N.E.	N.E.	N.E.	N.E.	N.E.	N.E.	N.E.	N.A.	NO	NO	NO	NO	NO	NO	NO	957	957	0.458	0.458	0.458
AT1G05940	A0A1P8AU02, A0A1P8AU13, A0A1P8AU30, Q9C5D6	CAT9	CAT9	cationic amino acid transporter 9	2.98228	2.82934	2.90148	2.53566	2.66214	2.75005	2.90436	2.64928	N.S.	0.836	-0.258	0.23314	2.61084	2.57425	2.87522	2.87347	3.03494	3.28234	2.68677	3.06358	N.S.	1.111	0.152	0.06187	Non-Target	NO	NO	NO	NO	3UTR	3UTR	Stop codon	2023, 2067, 2108, 2324	2324	0.456, 0.455, 0.452, 0.442	0.456	0.451
AT1G05950	A0A178W4P4, A0A1P8ANL7, A0A1P8ANN2, A0A1P8ANN5, Q9LNE9	AT1G05950		hypothetical protein	0.316719	0.301357	0.29654	0.0346159	0.0481166	0.261788	0.304872	0.11484	N.A.	N.A.	N.A.	N.A.	0.60445	0.460373	0.556998	0.556308	0.799439	0.597433	0.540607	0.65106	N.S.	1.159	0.213	0.0685	Non-Target	NO	NO	NO	NO	NO	NO	NO	2244, 2255, 2324, 2346, 2415	2415	0.41, 0.411, 0.414, 0.415, 0.413	0.415	0.413
AT1G05960	F4IAF5, F4IAF6, Q94KD1	AT1G05960		ARM repeat superfamily protein	3.85427	3.96391	3.98339	4.09503	4.1085	4.04295	3.93386	4.08216	N.S.	1.206	0.271	0.16474	2.51984	2.48866	2.7419	2.90223	2.97252	2.94639	2.58346	2.94038	1/1.5<=FC<=1.5	1.16	0.214	4.2e-05	PERMISSIVE	NO	YES	YES	3UTR	NO	NO	3' UTR, Stop codon	3583, 3666, 3685, 3738	3738	0.414, 0.413, 0.411, 0.415	0.415	0.413
AT1G05970	Q8L7G5, Q9LNE8	AT1G05970	AIPP1, EDM3	RNA-binding (RRM/RBD/RNP motifs) family protein	2.22695	2.07405	2.34332	1.99302	1.7764	1.90745	2.21477	1.89229	N.S.	0.796	-0.329	0.27093	2.12264	2.00839	2.06091	1.93558	2.04642	1.83622	2.06398	1.9394	1/1.5<=FC<=1.5	0.78	-0.359	0.00015	Non-Target	NO	NO	NO	NO	NO	NO	NO	861, 1142	1142	0.428, 0.452	0.452	0.44
AT1G05990	Q9LNE7	AT1G05990	RHS1	EF hand calcium-binding protein family	0.278721	0.321672	0.318083	0.29467	0.148027	0.396523	0.306158	0.27974	N.A.	N.A.	N.A.	N.A.	0.387549	0.366183	0.980535	0.872092	0.399933	0.870139	0.578089	0.714055	N.S.	0.9	-0.152	0.38691	Non-Target	NO	NO	NO	NO	NO	NO	NO	793	793	0.406	0.406	0.406
AT1G06000	Q1G3D2, Q9LNE6	AT1G06000	UGT89C1	UDP-Glycosyltransferase superfamily protein	3.91386	4.08034	4.1621	4.60545	4.4784	4.42772	4.0521	4.50386	UP	1.604	0.681	0.00101	5.19655	5.05017	4.9325	5.41717	5.50708	5.57559	5.05974	5.49995	N.S.	1.174	0.231	0.13371	Non-Target	NO	NO	NO	NO	NO	NO	NO	1587	1587	0.469	0.469	0.469
AT1G06010	Q84R19	AT1G06010		basic leucine zipper/W2 domain protein	3.33715	2.95776	2.96251	3.05858	3.12887	3.33872	3.08581	3.17539	N.S.	1.129	0.176	0.51177	3.438	3.20009	3.21503	3.14282	2.78248	2.84702	3.28437	2.92411	1/1.5<=FC<=1.5	0.726	-0.462	3e-07	PERMISSIVE	NO	YES	YES	3UTR	NO	NO	3' UTR	907	907	0.377	0.377	0.377
AT1G06020	Q9LNE4	AT1G06020	FRK3, FRK5	pfkB-like carbohydrate kinase family protein	0.41691	0.685756	0.326472	0.463896	0.402355	0.350517	0.476379	0.405589	N.A.	N.A.	N.A.	N.A.	0.414498	0.428218	0.18954	0.458097	0.394669	0.394262	0.344085	0.415676	N.S.	0.976	-0.035	0.83794	N.A.	NO	NO	NO	NO	NO	NO	NO	1398	1398	0.437	0.437	0.437
AT1G06030	Q9LNE3	AT1G06030	FRK2, FRK6	pfkB-like carbohydrate kinase family protein	1.03402	0.985293	0.700469	0.951081	1.23155	1.09067	0.906593	1.0911	N.S.	1.195	0.258	0.45477	0.342619	0.267557	0.273634	0.362079	0.521431	0.216548	0.294603	0.366686	N.S.	1.246	0.317	0.07991	Non-Target	NO	NO	NO	NO	NO	NO	NO	1216	1216	0.447	0.447	0.447
AT1G06040	F4IBY7, Q96288	STO	BBX24, STO	B-box zinc finger family protein	4.66007	4.38221	4.35655	4.70879	4.40812	4.34932	4.46628	4.48874	N.S.	1.085	0.117	0.62368	5.11065	5.25878	5.37759	5.41035	5.50164	5.49926	5.24901	5.47042	1/1.5<=FC<=1.5	0.893	-0.164	0.04913	N.A.	3UTR,3UTR	NO	NO	NO	3UTR	3UTR	Stop codon	1309, 1393	1393	0.413	0.413	0.413
AT1G06045	A0A1P8AUV9	AT1G06045		hypothetical protein	0.405792	0.845362	0.615234	0	0	0.733916	0.62213	0.244639	N.S.	0.957	-0.063	0.58721	N.E.	N.E.	N.E.	N.E.	N.E.	N.E.	N.E.	N.E.	N.E.	N.E.	N.E.	N.E.	N.A.	NO	NO	NO	NO	NO	NO	NO	267	267	0.472	0.472	0.472
AT1G06050	F4IBY8, Q9LNE2	AT1G06050		ENHANCED DISEASE RESISTANCE-like protein (DUF1336)	1.62987	1.49614	1.9141	1.59327	1.88149	1.47292	1.68004	1.64923	N.S.	1.012	0.017	0.96476	1.65361	1.7437	1.73158	1.72451	1.7315	1.74185	1.70963	1.73262	1/1.5<=FC<=1.5	0.893	-0.164	0.02599	Non-Target	NO	NO	NO	NO	NO	NO	NO	1428	1428	0.407	0.407	0.407
AT1G06060	A0A1P8AV86, Q9LNE1	AT1G06060		LisH and RanBPM domains containing protein	3.69896	3.69854	3.63228	3.55224	3.62798	3.49303	3.67659	3.55775	N.S.	0.953	-0.07	0.76689	2.82354	2.72751	2.79429	3.01438	2.98037	2.78654	2.78178	2.9271	N.S.	0.934	-0.099	0.13049	PERMISSIVE	NO	YES	NO	3UTR	3UTR	3UTR	NO	1117, 1220	1220	0.417, 0.411	0.417	0.414
AT1G06070	Q9LNE0	AT1G06070	bZIP69	Basic-leucine zipper (bZIP) transcription factor family protein	2.55975	2.46071	2.4338	2.60528	2.65305	2.54372	2.48475	2.60068	N.S.	1.183	0.242	0.25766	2.12376	2.16748	2.34353	2.52714	2.60274	2.75635	2.21159	2.62875	1/1.5<=FC<=1.5	1.219	0.286	5.4e-08	Non-Target	NO	NO	NO	NO	NO	NO	NO	2003	2003	0.424	0.424	0.424
AT1G06080	A0A1P8AU64, O65797	ADS1	ADS1, AtADS1	delta 9 desaturase 1	2.83834	1.27958	1.21603	0.65912	1.62702	0.765553	1.77798	1.01723	N.S.	0.826	-0.276	0.25057	2.97473	2.75096	2.85107	3.08224	3.20273	3.05971	2.85892	3.11489	N.S.	1.013	0.018	0.88286	Non-Target	NO	NO	NO	NO	NO	NO	NO	1334, 1335	1335	0.422, 0.404	0.422	0.413
AT1G06090	A0A178W8C2, Q9LND9	AT1G06090		Fatty acid desaturase family protein	4.62562	3.4369	3.53847	2.63721	3.40441	2.82345	3.867	2.95502	N.S.	0.588	-0.766	0.07974	5.44172	5.16931	5.33266	5.36891	5.21683	5.27597	5.31457	5.28724	N.S.	0.915	-0.128	0.36474	Non-Target	NO	NO	NO	NO	NO	NO	NO	2313	2313	0.355	0.355	0.355
AT1G06100	Q9LND8	AT1G06100		Fatty acid desaturase family protein	0.0621228	0	0.0947291	0	0	0	0.052284	0	N.A.	N.A.	N.A.	N.A.	0.0437135	0.0410421	0.0375029	0	0	0	0.0407528	0	N.A.	N.A.	N.A.	N.A.	Non-Target	NO	NO	NO	NO	NO	NO	NO	958	958	0.443	0.443	0.443
AT1G06110	A0A1P8ANB4, A0A1P8AND2, Q9LND7	SKIP16	SKIP16	SKP1/ASK-interacting protein 16	3.05127	3.08732	3.02118	2.86894	2.64507	2.75195	3.05326	2.75532	N.S.	0.806	-0.312	0.14094	2.98472	2.9393	3.1824	3.13995	3.15813	2.96582	3.03547	3.08797	1/1.5<=FC<=1.5	0.844	-0.244	0.00637	PERMISSIVE	NO	YES	YES	NO	3UTR	3UTR	NO	1606, 1735, 1929	1929	0.433, 0.428, 0.435	0.435	0.432
AT1G06120	Q9FPD5	AT1G06120		Fatty acid desaturase family protein	4.09802	4.19377	4.26153	3.54552	3.34193	3.80731	4.18444	3.56492	DOWN	0.606	-0.723	0.00264	4.004	3.68638	3.83405	3.67772	3.45163	3.62523	3.84148	3.58486	1/1.5<=FC<=1.5	0.744	-0.426	0.00218	Non-Target	NO	NO	NO	NO	NO	NO	NO	1155	1155	0.43	0.43	0.43
AT1G06130	A0A178WGK4, A0A178WGK7, Q8LDW8, Q8LDW8-2	GLX2-4	GLX2-4	glyoxalase 2-4	2.72863	2.45917	2.35621	2.04161	1.93345	2.04325	2.51467	2.0061	DOWN	0.637	-0.651	0.00876	2.35357	2.58583	2.44956	2.37466	2.3172	2.56888	2.46298	2.42025	1/1.5<=FC<=1.5	0.83	-0.269	0.01694	PERMISSIVE	NO	YES	YES	3UTR	3UTR	3UTR	Stop codon	1318, 1571	1571	0.405, 0.422	0.422	0.414
AT1G06135	Q8LCX3	AT1G06135		transmembrane protein	0.319778	0	0	0.16457	0.222734	1.02065	0.106593	0.469318	N.S.	1.111	0.152	0.32199	N.E.	N.E.	N.E.	N.E.	N.E.	N.E.	N.E.	N.E.	N.E.	N.E.	N.E.	N.E.	N.A.	NO	NO	NO	NO	NO	NO	NO	559	559	0.383	0.383	0.383
AT1G06140	Q9LND4	MEF3	MEF3	Pentatricopeptide repeat (PPR) superfamily protein	0.161601	0.057731	0.176838	0.0349105	0.13903	0.22542	0.132057	0.13312	N.A.	N.A.	N.A.	N.A.	0.33714	0.402991	0.388956	0.53907	0.668641	0.690909	0.376362	0.632873	1/1.5<=FC<=1.5	1.386	0.471	7.1e-05	Non-Target	NO	NO	NO	NO	NO	NO	NO	2226	2226	0.408	0.408	0.408
AT1G06143	Q56X05	AT1G06143		basic helix loop helix DNA-binding superfamily protein	0.309607	0.0692424	0.171327	0.228993	0.165542	0.218446	0.183392	0.204327	N.A.	N.A.	N.A.	N.A.	N.E.	N.E.	N.E.	N.E.	N.E.	N.E.	N.E.	N.E.	N.E.	N.E.	N.E.	N.E.	Non-Target	NO	NO	NO	NO	NO	NO	NO	1869	1869	0.422	0.422	0.422
AT1G06148	F4IC04, Q1G3W8	AT1G06148		hypothetical protein	0	0	0	0.087879	0.228755	0.179036	0	0.165223	N.A.	N.A.	N.A.	N.A.	N.E.	N.E.	N.E.	N.E.	N.E.	N.E.	N.E.	N.E.	N.E.	N.E.	N.E.	N.E.	N.A.	NO	NO	NO	NO	NO	NO	NO	1046, 1755	1755	0.397, 0.326	0.397	0.362
AT1G06150	P0C7P8, P0C7P8-2	EMB1444	EMB1444, LHL1	basic helix loop helix (bHLH) DNA-binding superfamily protein	0.882274	0.67315	0.630704	0.606247	0.629128	0.56241	0.728709	0.599262	N.S.	0.879	-0.185	0.58448	1.15212	1.11024	1.40146	1.49603	1.78827	1.80771	1.22127	1.69733	1/1.5<=FC<=1.5	1.302	0.38	0.00015	PERMISSIVE	NO	YES	NO	NO	NO	NO	coding_intron	2980, 2986	2986	0.422	0.422	0.422
AT1G06160	Q9LND1	ORA59	ERF59, ORA59	octadecanoid-responsive AP2/ERF 59	0.0538943	0	0.0823005	0	0	0	0.0453982	0	N.A.	N.A.	N.A.	N.A.	0.203189	0.191939	0.203001	0.164222	0.212032	0	0.199377	0.125418	N.A.	N.A.	N.A.	N.A.	Non-Target	NO	NO	NO	NO	NO	NO	NO	1086	1086	0.4	0.4	0.4
AT1G06170	Q9LND0	AT1G06170	bHLH089	basic helix-loop-helix (bHLH) DNA-binding superfamily protein	0.0713825	0.0840304	0.055622	0.233035	0.0708507	0.317257	0.070345	0.207048	N.A.	N.A.	N.A.	N.A.	0.174323	0.219771	0.313174	0.228122	0.300131	0	0.235756	0.176085	N.A.	N.A.	N.A.	N.A.	N.A.	NO	NO	NO	NO	NO	NO	NO	1554, 1588	1588	0.409, 0.419	0.419	0.414
AT1G06180	Q9LNC9	MYB13	ATMYB13, ATMYBLFGN, MYB13	myb domain protein 13	2.12007	1.88112	1.96799	2.45518	2.69295	2.433	1.98973	2.52704	UP	1.812	0.858	0.00169	2.75941	2.59229	2.64064	2.94491	2.78418	2.8062	2.66411	2.8451	1/1.5<=FC<=1.5	1.217	0.283	0.01873	Non-Target	NO	NO	NO	NO	NO	NO	NO	1076	1076	0.381	0.381	0.381
AT1G06190	A0A1P8AM09, A0A1P8AM12, Q94K75, Q94K75-2	RHON1	RHON1	Rho termination factor	1.36073	1.41719	1.59645	1.6444	1.73952	1.38088	1.45812	1.58827	N.S.	1.174	0.231	0.46916	2.87396	2.94473	2.99004	3.3258	3.32362	3.36345	2.93624	3.33762	1/1.5<=FC<=1.5	1.189	0.25	9.4e-07	Non-Target	NO	NO	NO	NO	3UTR	3UTR	NO	1265, 1558, 1695, 1838, 1852	1852	0.42, 0.416, 0.414, 0.418, 0.423	0.423	0.418
AT1G06200	A0A1P8AQV9, C0Z2F7, Q8W476	AT1G06200		Peptidase S24/S26A/S26B/S26C family protein	4.22271	4.16662	4.13062	3.79309	4.0794	4.02019	4.17332	3.96423	N.S.	0.886	-0.175	0.44259	5.02905	4.95747	5.00872	4.79711	4.72616	4.62547	4.99841	4.71625	1/1.5<=FC<=1.5	0.732	-0.449	< 2e-16	PERMISSIVE	NO	YES	YES	NO	3UTR	3UTR	Stop codon	985, 1111	1111	0.422, 0.43	0.43	0.426
AT1G06210	Q9LNC6, Q9LNC6-2	AT1G06210		ENTH/VHS/GAT family protein	4.07762	3.96163	3.84369	3.71562	3.78959	3.84915	3.96098	3.78479	N.S.	0.902	-0.148	0.46731	3.66406	3.46374	3.55724	3.45385	3.25573	3.11006	3.56168	3.27321	1/1.5<=FC<=1.5	0.802	-0.318	6.1e-08	PERMISSIVE	NO	YES	YES	3UTR	NO	NO	NO	1584, 1661	1661	0.415, 0.407	0.415	0.411
AT1G06220	Q9LNC5	MEE5	CLO, GFA1, MEE5	Ribosomal protein S5/Elongation factor G/III/V family protein	2.6975	2.33527	2.13697	2.12468	2.13676	1.9978	2.38991	2.08641	N.S.	0.783	-0.354	0.15271	3.06187	2.93941	3.29923	3.27648	3.35472	3.55813	3.10017	3.39644	1/1.5<=FC<=1.5	1.184	0.244	1.7e-07	PERMISSIVE	NO	YES	NO	3UTR	3UTR	3UTR	3' UTR	3447, 3473, 3580	3580	0.434, 0.437, 0.431	0.437	0.434
AT1G06225	Q3EDH8	3	3	CLAVATA3/ESR-RELATED 3	0	0	0.519768	0	0	0	0.173256	0	N.A.	N.A.	N.A.	N.A.	0	0	0.666808	0	0	0	0.222269	0	N.A.	N.A.	N.A.	N.A.	N.A.	NO	NO	NO	NO	NO	NO	NO	381	381	0.396	0.396	0.396
AT1G06230	Q9LNC4	GTE4	GTE4	global transcription factor group E4	2.4606	2.34452	2.4534	2.68183	2.4757	2.50463	2.41951	2.55405	N.S.	1.208	0.272	0.18579	2.21341	2.1941	2.45294	2.63622	2.79491	2.83173	2.28682	2.75429	1/1.5<=FC<=1.5	1.215	0.281	7.3e-07	PERMISSIVE	NO	YES	NO	3UTR	3UTR	3UTR	3' UTR	3217, 3316, 3523, 3602	3602	0.427, 0.421, 0.429	0.429	0.424
AT1G06240	Q8H109	AT1G06240		diiron containing four-helix bundle family ferritin protein, putative (Protein of unknown function DUF455)	1.40186	0.876318	1.11317	1.05313	1.02799	0.93422	1.13045	1.00511	N.S.	0.912	-0.133	0.70387	1.4748	1.39019	1.57887	1.39728	1.58621	1.43113	1.48129	1.47154	N.S.	1.095	0.131	0.14857	Non-Target	NO	NO	NO	3UTR	NO	NO	NO	1643	1643	0.44	0.44	0.44
AT1G06250	A0A178W7H7, A0A1P8AV16, Q9LNC2	AT1G06250		alpha/beta-Hydrolases superfamily protein	0.271333	0.314611	0.263648	0.294526	0.277974	0.212078	0.283198	0.261526	N.A.	N.A.	N.A.	N.A.	0.186648	0.0967927	0.180714	0.0922801	0.280886	0.377693	0.154718	0.250286	N.A.	N.A.	N.A.	N.A.	N.A.	NO	NO	NO	NO	NO	NO	NO	1094, 1481	1481	0.419, 0.427	0.427	0.423
AT1G06260	Q9LNC1	AT1G06260		Cysteine proteinases superfamily protein	0.108871	0	0	0	0.108094	0.109823	0.0362905	0.0726393	N.A.	N.A.	N.A.	N.A.	0	0.0512357	0	0	0	0	0.0170786	0	N.A.	N.A.	N.A.	N.A.	N.A.	NO	NO	NO	NO	NO	NO	NO	1051	1051	0.45	0.45	0.45
AT1G06270	Q9LNC0	AT1G06270		Pentatricopeptide repeat (PPR) superfamily protein	0.740903	0.513657	0.471358	0.695514	0.572718	0.619355	0.575306	0.629196	N.S.	1.071	0.098	0.78365	1.69443	1.68265	1.69547	1.87192	1.94135	1.59193	1.69085	1.80173	N.S.	1.034	0.048	0.6886	Non-Target	NO	NO	NO	NO	NO	NO	NO	1617	1617	0.42	0.42	0.42
AT1G06290	P0CZ23	ACX3	ACX3, ATACX3	acyl-CoA oxidase 3	4.52893	4.57917	4.54892	4.39112	4.52901	4.56361	4.55234	4.49458	N.S.	1.006	0.008	0.97446	3.98968	3.90009	4.04184	4.38471	4.3707	4.47456	3.9772	4.40999	1/1.5<=FC<=1.5	1.175	0.233	0.006	PERMISSIVE	NO	YES	NO	NO	3UTR	3UTR	NO	2519	2519	0.422	0.422	0.422
AT1G06310	Q9LMI7	ACX6	ACX6	acyl-CoA oxidase 6	0.112171	0.0548035	0	0	0	0.0913807	0.0556581	0.0304602	N.A.	N.A.	N.A.	N.A.	1.03818	0.93345	1.0882	0.980177	1.01543	1.07336	1.01994	1.02299	N.S.	0.901	-0.15	0.18462	Non-Target	NO	NO	NO	NO	NO	NO	NO	2348	2348	0.425	0.425	0.425
AT1G06320	Q3EDH7	AT1G06320		hypothetical protein	1.61785	1.49471	0.599877	0.536063	0.333597	0.590627	1.23748	0.486762	N.S.	0.468	-1.094	0.0507	1.23481	1.01332	1.16521	0.825526	0.993776	1.03859	1.13778	0.952632	N.S.	0.893	-0.164	0.24276	Non-Target	NO	NO	NO	NO	NO	NO	NO	667	667	0.424	0.424	0.424
AT1G06330	A0A384LI88	AT1G06330		Heavy metal transport/detoxification superfamily protein	2.00136	1.27465	1.03996	0.639651	0.96607	0.492589	1.43866	0.699437	DOWN	0.441	-1.182	0.0251	2.92277	2.93197	2.72592	2.86625	2.70364	2.94417	2.86022	2.83802	N.S.	1.133	0.18	0.24379	Non-Target	NO	NO	NO	NO	NO	NO	NO	971	971	0.406	0.406	0.406
AT1G06340	Q9LMI5	AT1G06340		Plant Tudor-like protein	0	0	0	0	0.142516	0	0	0.0475052	N.A.	N.A.	N.A.	N.A.	0	0	0	0	0.056798	0	0	0.0189327	N.A.	N.A.	N.A.	N.A.	N.A.	NO	NO	NO	NO	NO	NO	NO	820	820	0.389	0.389	0.389
AT1G06350	Q9LMI4	ADS4	ADS4, AtADS4	Fatty acid desaturase family protein	0.133693	0.106949	0	0.126942	0.090421	0	0.0802139	0.0724543	N.A.	N.A.	N.A.	N.A.	0.0612202	0.213109	0.150437	0.602967	0.656954	0.446627	0.141589	0.568849	N.S.	1.122	0.167	0.33958	Non-Target	NO	NO	NO	NO	NO	NO	NO	1238	1238	0.414	0.414	0.414
AT1G06380	Q9LMI1	AT1G06380		Ribosomal protein L1p/L10e family	1.07228	0.554406	0.565774	1.10853	0.536322	1.23429	0.73082	0.959712	N.S.	1.21	0.275	0.42035	2.94927	3.05266	2.95509	3.23119	3.20514	3.01424	2.98567	3.15019	N.S.	1.072	0.1	0.46484	Non-Target	NO	NO	NO	NO	NO	NO	NO	1311	1311	0.399	0.399	0.399
AT1G06390	Q39012	GSK1	ATGSK1, ATSK2-3, ATSK22, BIL2, GSK1, SK22	GSK3/SHAGGY-like protein kinase 1	3.93704	3.65608	3.36266	3.43805	3.45336	3.19947	3.65193	3.36363	N.S.	0.816	-0.294	0.22727	3.16832	3.02148	3.28492	3.1047	3.04655	3.00847	3.15824	3.05324	1/1.5<=FC<=1.5	0.884	-0.179	0.01284	N.A.	3UTR,3UTR,3UTR	NO	NO	NO	3UTR	3UTR	Stop codon	1590, 1771	1771	0.414, 0.423	0.423	0.418
AT1G06400	P28185	-2	ARA-2, ARA2, ATRAB11E, ATRABA1A	Ras-related small GTP-binding family protein	4.53247	4.51773	4.58294	4.49539	4.56047	4.50428	4.54438	4.52005	N.S.	1.034	0.049	0.83035	4.49292	4.48786	4.441	4.37687	4.11233	3.9625	4.47392	4.15057	1/1.5<=FC<=1.5	0.712	-0.489	1.7e-10	STRINGENT	3UTR	YES	NO	NO	3UTR	3UTR	Stop codon	1338	1338	0.398	0.398	0.398
AT1G06410	Q9LMI0	TPS7	ATTPS7, ATTPSA, TPS7	trehalose-phosphatase/synthase 7	4.23552	4.14264	4.19041	4.05653	4.04616	3.96445	4.18952	4.02238	N.S.	0.908	-0.14	0.43555	2.84565	2.87272	3.19981	3.05429	3.42492	3.53062	2.97273	3.33661	1/1.5<=FC<=1.5	1.237	0.307	4.5e-05	STRINGENT	3UTR,3UTR,3UTR	YES	NO	NO	3UTR	3UTR	3' UTR	3401, 3438, 3521	3521	0.41, 0.408, 0.411	0.411	0.41
AT1G06420	F4IDM0, Q9LMH9	AT1G06420		DNA ligase-like protein	0.515473	0.313436	0.446007	0.811538	0.227156	0.273056	0.424972	0.43725	N.S.	1.046	0.065	0.83202	0.486092	0.330872	0.654154	0.403131	0.721943	0.84292	0.490373	0.655998	N.S.	0.987	-0.018	0.9127	Non-Target	NO	NO	NO	NO	NO	NO	NO	956, 1150	1150	0.39, 0.381	0.39	0.386
AT1G06430	Q8W585, Q9LMH8	FTSH8	FTSH8	FTSH protease 8	1.90587	1.73442	2.07213	2.08111	2.56248	2.3875	1.90414	2.3437	UP	1.632	0.707	0.01287	3.01645	3.05399	3.07485	3.19702	3.35026	3.23539	3.04843	3.26089	N.S.	1.072	0.101	0.08633	STRINGENT	3UTR,3UTR,3UTR	YES	NO	NO	3UTR	3UTR	Stop codon	2291, 2433, 2681	2681	0.431, 0.448, 0.442	0.448	0.44
AT1G06440	Q9SHI9	AT1G06440		Ubiquitin carboxyl-terminal hydrolase family protein	0.163252	0.0677297	0.128369	0.080502	0	0	0.119784	0.026834	N.A.	N.A.	N.A.	N.A.	1.04188	1.13082	1.08451	1.21051	1.27127	1.49034	1.08574	1.32404	1/1.5<=FC<=1.5	1.237	0.307	0.00376	Non-Target	NO	NO	NO	NO	NO	NO	NO	1909	1909	0.412	0.412	0.412
AT1G06450	Q9SHJ0	AT1G06450		Polynucleotidyl transferase, ribonuclease H-like superfamily protein	1.06125	1.13297	0.942688	1.46203	1.84459	1.64445	1.04563	1.65036	UP	2.186	1.128	0.00244	1.27613	1.4552	1.42504	2.2578	2.38544	2.46848	1.38546	2.37057	UP	1.942	0.957	< 2e-16	Non-Target	NO	NO	NO	NO	NO	NO	NO	1380	1380	0.438	0.438	0.438
AT1G06460	Q208N7, Q9SHJ1	ACD32.1	ACD31.2, ACD32.1	alpha-crystallin domain 32.1	0.75029	1.05883	0.772773	0.960596	0.893727	1.0864	0.860633	0.980241	N.S.	1.138	0.187	0.58588	0.701309	0.939155	1.17593	1.36359	1.89952	1.63882	0.938798	1.63398	UP	1.953	0.966	< 2e-16	Non-Target	NO	NO	NO	NO	3UTR	3UTR	Stop codon	1321	1321	0.415	0.415	0.415
AT1G06470	A0A178W8U2, A0A178WAF5, Q8H184	AT1G06470		Nucleotide/sugar transporter family protein	3.10256	2.77486	2.84474	2.61645	2.4438	2.43495	2.90739	2.4984	1/1.5<=FC<=1.5	0.713	-0.489	0.01726	2.78387	2.61742	2.9069	2.63887	2.64174	2.70407	2.7694	2.66156	1/1.5<=FC<=1.5	0.9	-0.152	0.03505	PERMISSIVE	NO	YES	YES	NO	NO	NO	Stop codon	1834, 2368, 2492, 2759	2759	0.4, 0.405, 0.403	0.405	0.402
AT1G06475	Q6DSU2	AT1G06475		transmembrane protein	0.719073	0	0	2.29667	1.76729	0	0.239691	1.35465	N.S.	1.046	0.064	0.33967	3.45074	3.39729	3.06321	3.08249	2.92178	2.35314	3.30375	2.7858	1/1.5<=FC<=1.5	0.758	-0.4	0.00068	Non-Target	NO	NO	NO	NO	NO	3UTR	NO	574	574	0.411	0.411	0.411
AT1G06490	E9KSP0, Q9SHJ3	CalS7	ATGSL07, atgsl7, CalS7, gsl07, GSL07, GSL7	glucan synthase-like 7	0.178548	0.0808083	0.161903	0.301177	0.242725	0.357616	0.14042	0.300506	N.A.	N.A.	N.A.	N.A.	0.297165	0.307097	0.522922	0.511067	0.731388	0.854988	0.375728	0.699148	UP	1.663	0.734	3.8e-08	Non-Target	NO	NO	NO	NO	NO	NO	NO	6033, 6549	6549	0.415, 0.418	0.418	0.416
AT1G06500	Q8VY54	AT1G06500		hypothetical protein	1.72218	1.74742	1.54376	1.61738	1.59226	1.50465	1.67112	1.57143	N.S.	0.966	-0.049	0.89451	2.75798	2.81491	2.8419	2.73267	2.71646	2.67903	2.80493	2.70939	1/1.5<=FC<=1.5	0.853	-0.229	0.00327	Non-Target	NO	NO	NO	NO	NO	3UTR	NO	577, 680, 739, 798	798	0.435, 0.431, 0.426, 0.419	0.435	0.428
AT1G06510	Q84K72, Q9SHJ4	AT1G06510		forkhead-associated domain protein	1.8658	1.44273	1.56744	0.956915	1.31096	1.06487	1.62532	1.11091	N.S.	0.62	-0.689	0.05623	1.80339	1.64188	1.6178	1.75344	1.61056	1.50872	1.68769	1.62424	N.S.	0.958	-0.062	0.59366	Non-Target	NO	NO	NO	NO	NO	3UTR	NO	1252	1252	0.407	0.407	0.407
AT1G06515	A8MSB8	AT1G06515	ssSPTa	transmembrane protein, putative (DUF3317)	4.83615	4.45204	4.12017	3.70399	3.52956	3.7595	4.46945	3.66435	DOWN	0.487	-1.039	6.6e-05	4.20577	4.15623	4.00145	3.82081	3.81262	3.66586	4.12115	3.76643	DOWN	0.627	-0.674	4.2e-12	N.A.	3UTR,3UTR	NO	NO	NO	3UTR	3UTR	NO	633, 680	680	0.394, 0.389	0.394	0.392
AT1G06520	Q9SHJ5	GPAT1	ATGPAT1, GPAT1, sn-2-GPAT1	glycerol-3-phosphate acyltransferase 1	0.0696688	0.055483	0.0364592	0.0974007	0.0466211	0.0473997	0.0538703	0.0638072	N.A.	N.A.	N.A.	N.A.	0.0147319	0.0276463	0.0497678	0.0520961	0.0756083	0	0.0307153	0.0425681	N.A.	N.A.	N.A.	N.A.	Non-Target	NO	NO	NO	NO	NO	NO	NO	2313	2313	0.406	0.406	0.406
AT1G06530	Q9SHJ6	PMD2	PMD2	Tropomyosin-like protein	3.03822	3.02574	3.22811	3.31394	3.31813	3.41105	3.09735	3.34771	N.S.	1.32	0.401	0.06854	3.08876	3.2749	3.28202	3.42344	3.69575	3.7865	3.21523	3.63523	1/1.5<=FC<=1.5	1.239	0.309	9e-06	Non-Target	NO	NO	NO	NO	NO	NO	CDS	1421	1421	0.439	0.439	0.439
AT1G06540	Q9SHJ7	AT1G06540		hypothetical protein	0.906859	0.498195	0.44572	1.41046	1.0228	0.556841	0.616925	0.996702	N.S.	1.614	0.69	0.10124	0.771086	0.717697	0.573297	0.569679	0.520048	0	0.68736	0.363242	N.S.	0.921	-0.119	0.49947	N.A.	NO	NO	NO	NO	NO	NO	NO	1933	1933	0.442	0.442	0.442
AT1G06550	Q9SHJ8	AT1G06550		ATP-dependent caseinolytic (Clp) protease/crotonase family protein	4.13475	3.88625	4.11418	4.80842	4.65967	4.47991	4.04506	4.64933	UP	1.907	0.931	1.6e-06	4.45934	4.29252	4.29442	4.56512	4.46753	4.41914	4.34876	4.48393	1/1.5<=FC<=1.5	1.151	0.203	0.00171	PERMISSIVE	NO	YES	YES	NO	3UTR	3UTR	Stop codon	1584	1584	0.417	0.417	0.417
AT1G06560	Q84MA1	AT1G06560	AtTRM4f, NOP2C, TRM4f	NOL1/NOP2/sun family protein	1.25489	0.591012	0.672076	1.0785	1.09848	1.1113	0.839325	1.09609	N.S.	1.243	0.314	0.36748	1.98322	1.90879	2.16638	2.08877	2.1441	2.39393	2.01946	2.20893	N.S.	1.032	0.045	0.50487	Non-Target	NO	NO	NO	NO	NO	NO	NO	2027	2027	0.44	0.44	0.44
AT1G06570	A0A178WHQ7, F4IDP2, O82449, P93836	PDS1	HPD, HPPD, PDS1	4-hydroxyphenylpyruvate dioxygenase	3.49095	3.90249	4.1884	3.88272	4.24612	4.10109	3.86061	4.07664	N.S.	1.194	0.256	0.39459	3.23013	3.08285	3.45733	3.6175	3.61909	3.45236	3.25677	3.56298	N.S.	1.043	0.06	0.67851	Non-Target	NO	NO	NO	NO	NO	NO	NO	1338, 1547	1547	0.466, 0.493	0.493	0.48
AT1G06580	A0A1P8AN74, Q9SHK2	AT1G06580	PPR1	Pentatricopeptide repeat (PPR) superfamily protein	0.239135	0.120563	0.11793	0.314703	0.194276	0.296664	0.159209	0.268547	N.A.	N.A.	N.A.	N.A.	0.761795	0.628986	0.619611	0.530482	0.45448	0.37348	0.670131	0.452814	N.S.	1.062	0.087	0.53236	Non-Target	NO	NO	NO	NO	NO	NO	NO	2075, 2078, 2278	2278	0.399, 0.397	0.399	0.398
AT1G06590	A0A178WBL7, A0A178WBM6, Q8H1U4	AT1G06590		anaphase-promoting complex subunit	1.29528	1.25783	1.13515	1.21688	1.32172	1.16628	1.22942	1.23496	N.S.	1.059	0.083	0.79258	1.16699	1.11732	1.44864	1.38332	1.60319	1.60564	1.24431	1.53071	1/1.5<=FC<=1.5	1.218	0.285	9.5e-05	PERMISSIVE	NO	YES	NO	3UTR	NO	NO	NO	3193	3193	0.432	0.432	0.432
AT1G06620	A0A1P8AM08, Q84MB3	AT1G06620		2-oxoglutarate (2OG) and Fe(II)-dependent oxygenase superfamily protein	4.05613	4.18864	4.10598	3.60844	3.88761	4.08123	4.11692	3.8591	N.S.	0.861	-0.215	0.40189	3.59186	3.57884	3.76627	3.95761	3.97668	3.92138	3.64566	3.95189	1/1.5<=FC<=1.5	1.108	0.148	0.00869	Non-Target	NO	NO	NO	NO	NO	NO	NO	1491, 1578	1578	0.428, 0.423	0.428	0.426
AT1G06630	A0A1P8ARQ2, A0A1P8ARR9, A0A1P8ARS0, F4IDP6, P0C2G0	AT1G06630		F-box/RNI-like superfamily protein	2.20549	2.31109	2.2774	2.43215	2.46646	2.42908	2.26466	2.44256	N.S.	1.247	0.318	0.18162	1.88488	1.84774	2.00245	2.20804	2.11771	2.18464	1.91169	2.17013	1/1.5<=FC<=1.5	1.15	0.202	0.00097	Non-Target	NO	NO	NO	3UTR	NO	NO	NO	1471, 1639, 1643, 1650, 1674, 1736, 1737, 1745, 1796	1796	0.406, 0.405, 0.41, 0.407, 0.411, 0.422, 0.42	0.422	0.411
AT1G06640	F4IDQ0, Q9C5K7, Q9C5K7-2	AT1G06640		2-oxoglutarate (2OG) and Fe(II)-dependent oxygenase superfamily protein	3.77683	3.64232	3.76653	3.68921	3.98423	4.14652	3.72856	3.93999	N.S.	1.289	0.366	0.12091	4.59217	4.62903	4.75786	4.72543	4.60206	4.51413	4.65968	4.61388	1/1.5<=FC<=1.5	0.81	-0.304	0.0365	PERMISSIVE	NO	YES	YES	NO	3UTR	3UTR	NO	1272, 1506, 2187	2187	0.385, 0.451, 0.43	0.451	0.422
AT1G06645	F4IDQ2	AT1G06645		2-oxoglutarate (2OG) and Fe(II)-dependent oxygenase superfamily protein	1.1969	1.13069	1.43855	0.629268	0.428414	0.659347	1.25538	0.572343	DOWN	0.395	-1.339	0.00414	0.211847	0.0542306	0.141789	0.0347077	0.316659	0.162313	0.135956	0.171226	N.A.	N.A.	N.A.	N.A.	Non-Target	NO	NO	NO	NO	NO	NO	NO	1499	1499	0.424	0.424	0.424
AT1G06650	Q8H1S4, Q8H1S4-2	AT1G06650		2-oxoglutarate (2OG) and Fe(II)-dependent oxygenase superfamily protein	1.23777	0.805129	0.844708	0.218463	0.294526	0.160182	0.962535	0.224391	DOWN	0.213	-2.228	0.00138	2.42242	2.47532	2.69957	2.51187	2.64192	2.52	2.53244	2.55793	N.S.	0.945	-0.081	0.57323	PERMISSIVE	NO	YES	NO	3UTR	3UTR	3UTR	Stop codon	1360, 1452	1452	0.42	0.42	0.42
AT1G06660	F4IDQ5	JASON	JASON	aspartyl/glutamyl-tRNA(Asn/Gln) amidotransferase subunit	0.473446	0.195022	0.171511	0.158502	0.113472	0.0593118	0.279993	0.110429	N.A.	N.A.	N.A.	N.A.	1.39442	1.30791	1.69334	1.08826	1.29128	1.37015	1.46522	1.2499	DOWN	0.547	-0.87	< 2e-16	Non-Target	NO	NO	NO	NO	NO	NO	NO	1867	1867	0.427	0.427	0.427
AT1G06670	A0A178W2W9, A0A1P8ASP8, F4IDQ6	NIH	NIH	nuclear DEIH-boxhelicase	1.40348	1.10851	1.03872	1.38777	1.35077	1.31441	1.18357	1.35098	N.S.	1.263	0.337	0.18955	1.95928	1.85319	2.12417	2.23716	2.70323	2.79814	1.97888	2.57951	UP	1.68	0.749	< 2e-16	Non-Target	NO	NO	NO	NO	3UTR	NO	NO	5080, 5210	5210	0.431, 0.432	0.432	0.432
AT1G06680	C0Z3I6, Q42029, Q42029-2	PSBP-1	OE23, OEE2, PSBP-1, PSII-P	photosystem II subunit P-1	2.08683	1.79153	2.07616	2.61871	2.72696	2.66772	1.98484	2.67113	UP	2.13	1.091	1.7e-05	3.85806	4.21254	4.34165	4.58842	4.84432	4.49155	4.13741	4.64143	N.S.	1.127	0.172	0.05984	STRINGENT	3UTR,3UTR	YES	NO	NO	CDS, 3UTR	5UTR, 3UTR, CDS	NO	1069, 1351	1351	0.443, 0.458	0.458	0.45
AT1G06690	A0A178WN58, A0A178WPY4, Q94A68	AT1G06690		NAD(P)-linked oxidoreductase superfamily protein	1.09752	1.05044	0.954907	1.23195	1.70376	1.2164	1.03429	1.38404	N.S.	1.545	0.628	0.0798	2.04517	2.07351	2.25843	2.45694	2.60305	2.34359	2.1257	2.46786	1/1.5<=FC<=1.5	1.139	0.188	0.02515	PERMISSIVE	NO	YES	NO	NO	CDS	3UTR	NO	1607	1607	0.445	0.445	0.445
AT1G06700	Q8H1G6	AT1G06700		Protein kinase superfamily protein	4.78228	4.77375	4.71126	4.6511	4.69748	4.60433	4.75577	4.65097	N.S.	0.963	-0.054	0.79299	3.71474	3.59159	3.78234	3.7182	3.59202	3.47369	3.69623	3.59464	1/1.5<=FC<=1.5	0.826	-0.276	0.00037	STRINGENT	3UTR,3UTR,3UTR	YES	YES	StartCodon, 3UTR	3UTR	3UTR	NO	1885, 1933, 2131	2131	0.401, 0.402, 0.396	0.402	0.4
AT1G06710	A0A1P8AQ62, Q9M9X9	AT1G06710	MTSF1	Tetratricopeptide repeat (TPR)-like superfamily protein	0.0963551	0.0729205	0.115908	0.146769	0.229312	0.18618	0.095061	0.18742	N.A.	N.A.	N.A.	N.A.	0.509459	0.368567	0.558381	0.687496	0.785071	0.828754	0.478802	0.767107	1/1.5<=FC<=1.5	1.463	0.549	2.7e-11	Non-Target	NO	NO	NO	NO	NO	NO	NO	3418, 3647, 3828, 3938, 3957, 3962, 3992, 4047, 4163, 4180, 4181, 4218, 4260, 4270, 4339, 4350, 4394, 4429, 4484	4484	0.392, 0.39, 0.395, 0.391, 0.394, 0.397, 0.4, 0.396, 0.399	0.4	0.394
AT1G06720	A0A1P8AVE9, A0A1P8AVJ3, F4IDR3, Q94B48	AT1G06720		P-loop containing nucleoside triphosphate hydrolases superfamily protein	0.916145	0.922846	1.05188	0.968248	1.17631	1.17378	0.963623	1.10611	N.S.	1.234	0.304	0.30721	1.61278	1.58376	1.84832	1.94993	2.5302	2.49086	1.68162	2.32366	UP	1.864	0.898	2.8e-12	Non-Target	NO	NO	NO	3UTR	NO	NO	NO	2962, 3657, 3901	3901	0.412, 0.411, 0.42	0.42	0.414
AT1G06730	Q9ASV2	AT1G06730		pfkB-like carbohydrate kinase family protein	2.27202	2.01161	1.96447	2.05244	2.04894	2.05647	2.0827	2.05261	N.S.	1.018	0.025	0.93522	2.1199	2.1631	2.15151	2.13368	2.13444	2.0324	2.14483	2.10017	1/1.5<=FC<=1.5	0.901	-0.151	0.01341	Non-Target	NO	NO	NO	NO	NO	NO	NO	1997	1997	0.433	0.433	0.433
AT1G06740	Q9M9Y2	MUG3	MUG3	MuDR family transposase	0.311242	0.281277	0.469288	0.392717	0.404196	0.722372	0.353936	0.506428	N.S.	1.227	0.295	0.38183	0.955355	1.04929	1.19807	1.49433	1.44777	1.28367	1.06757	1.40859	1/1.5<=FC<=1.5	1.366	0.45	1.6e-12	Non-Target	NO	NO	NO	NO	NO	NO	NO	2430	2430	0.43	0.43	0.43
AT1G06750	F4IDR5, F4IDR6	AT1G06750		P-loop containing nucleoside triphosphate hydrolases superfamily protein	0.249799	0.130608	0.0870049	0.201246	0	0	0.155804	0.0670821	N.A.	N.A.	N.A.	N.A.	0	0	0.029518	0	0	0	0.00983934	0	N.A.	N.A.	N.A.	N.A.	N.A.	NO	NO	NO	NO	NO	NO	NO	1738, 1917, 2179	2179	0.436, 0.43, 0.441	0.441	0.436
AT1G06760	P26568	AT1G06760	H1.1	winged-helix DNA-binding transcription factor family protein	4.63982	4.11221	4.10174	4.23401	3.95127	4.08255	4.28459	4.08928	N.S.	0.886	-0.175	0.49179	5.94425	6.07121	6.02397	6.1657	6.1306	6.15863	6.01314	6.15164	N.S.	0.934	-0.098	0.27961	Non-Target	NO	NO	NO	NO	NO	5UTR	NO	1159	1159	0.461	0.461	0.461
AT1G06770	A0A1P8ARB2, Q9M9Y4, Q9M9Y4-2	DRIP1	AtBMI1B, ATDRIP1, AtRING1B, DRIP1	DREB2A-interacting protein 1	1.49945	1.40996	1.47502	1.15068	1.56606	1.29679	1.46148	1.33784	N.S.	0.945	-0.082	0.81022	1.23948	1.19527	1.39772	1.14194	1.34828	0.773885	1.27749	1.08803	1/1.5<=FC<=1.5	0.881	-0.183	0.03089	Non-Target	NO	NO	NO	3UTR	NO	NO	NO	1970, 1982, 2280	2280	0.396, 0.408	0.408	0.404
AT1G06780	F4IDS0, Q9M9Y5	GAUT6	GAUT6	galacturonosyltransferase 6	4.01993	3.81165	3.83342	3.56383	3.61159	3.66661	3.88833	3.61401	N.S.	0.82	-0.287	0.0994	2.81181	2.66023	2.84815	2.83699	2.79208	2.91588	2.7734	2.84832	N.S.	1.014	0.02	0.80057	Non-Target	NO	NO	NO	NO	NO	NO	NO	2391, 2465	2465	0.404, 0.408	0.408	0.406
AT1G06790	F4HNT3, Q9M9Y6	AT1G06790	NRPC7	RNA polymerase Rpb7 N-terminal domain-containing protein	1.87739	1.3117	1.10048	1.28355	1.17222	1.23676	1.42986	1.23084	N.S.	0.869	-0.203	0.55527	2.8618	2.71816	2.80231	2.80917	2.67663	2.56877	2.79409	2.68486	N.S.	0.953	-0.07	0.49789	PERMISSIVE	NO	YES	YES	NO	NO	NO	NO	960, 1452	1452	0.42, 0.413	0.42	0.416
AT1G06800	F4HNT5, Q941F1, Q941F1-2	PLA-I{gamma}1	DALL4, PLA-I{gamma}1	alpha/beta-Hydrolases superfamily protein	2.42922	2.41809	2.50531	2.88311	2.95595	3.1536	2.45087	2.99755	UP	1.841	0.88	7.1e-05	2.68741	2.58812	2.66189	3.01881	3.14118	3.07787	2.64581	3.07929	1/1.5<=FC<=1.5	1.276	0.351	0.00051	Non-Target	NO	NO	NO	NO	NO	NO	NO	1831, 1912	1912	0.485, 0.474	0.485	0.48
AT1G06820	A0A1P8ATA5, A0A1P8ATC2, A0A1P8ATE5, Q9M9Y8	CRTISO	CCR2, CRTISO	carotenoid isomerase	1.90443	1.4765	1.649	1.77814	1.68792	1.63196	1.67664	1.69934	N.S.	1.061	0.085	0.78256	1.62044	1.53863	1.72125	1.68825	1.91785	1.95768	1.62678	1.85459	1/1.5<=FC<=1.5	1.098	0.135	0.0341	PERMISSIVE	NO	YES	YES	3UTR	3UTR	3UTR	NO	2292, 2405, 2473, 2551	2551	0.411, 0.403, 0.406, 0.402	0.411	0.406
AT1G06840	C0LGD7, C0LGD7-2	AT1G06840		Leucine-rich repeat protein kinase family protein	2.7242	2.67251	2.91731	2.75204	2.57467	2.70715	2.77134	2.67795	N.S.	0.965	-0.052	0.84864	1.97045	1.98526	2.19272	2.16297	2.44637	2.46606	2.04948	2.35847	N.S.	1.137	0.186	0.1126	Non-Target	NO	NO	NO	NO	NO	NO	NO	3268	3268	0.427	0.427	0.427
AT1G06850	F4HNU1, Q8VWG0, Q9M9Z1	bZIP52	AtbZIP52, bZIP52	basic leucine-zipper 52	2.93846	2.3153	2.40869	2.98028	2.66919	2.59255	2.55415	2.74734	N.S.	1.214	0.28	0.33139	2.40623	2.30406	2.47138	2.67694	2.61994	2.75053	2.39389	2.68247	1/1.5<=FC<=1.5	1.166	0.222	0.0148	Non-Target	NO	NO	NO	3UTR	NO	NO	NO	874, 1430	1430	0.436, 0.467	0.467	0.452
AT1G06870	Q9M9Z2	Plsp2A	Plsp2A	Peptidase S24/S26A/S26B/S26C family protein	4.01849	3.70924	3.6308	4.22579	4.04247	4.11112	3.78618	4.12646	1/1.5<=FC<=1.5	1.454	0.54	0.0043	3.35875	3.34247	3.42936	3.55566	3.55203	3.67156	3.37686	3.59308	N.S.	1.115	0.157	0.16491	Non-Target	NO	NO	NO	NO	3UTR	3UTR	NO	1768	1768	0.436	0.436	0.436
AT1G06890	A0A1P8ANY9, F4HNU3, Q8RXL8	AT1G06890	UXT3	nodulin MtN21 /EamA-like transporter family protein	4.66432	4.51516	4.3751	4.12138	4.16402	4.14315	4.51819	4.14285	1/1.5<=FC<=1.5	0.744	-0.426	0.01128	3.96071	3.86402	4.15612	4.05718	4.04928	4.14089	3.99361	4.08245	1/1.5<=FC<=1.5	0.917	-0.125	0.03369	PERMISSIVE	NO	YES	YES	3UTR	3UTR	3UTR	coding_intron	1573, 1588, 1660, 1831	1831	0.42, 0.404, 0.421, 0.413	0.421	0.414
AT1G06900	F4HNU6	AT1G06900		Insulinase (Peptidase family M16) family protein	2.82666	2.39444	2.46708	2.47688	2.41834	2.31997	2.56273	2.40506	N.S.	0.905	-0.144	0.55247	2.59643	2.58029	2.79235	2.78682	3.06002	3.01151	2.65636	2.95278	1/1.5<=FC<=1.5	1.146	0.196	0.0001	PERMISSIVE	NO	YES	YES	3UTR	NO	3UTR	NO	3575	3575	0.409	0.409	0.409
AT1G06910	Q6R0E4	TRFL7	TRFL7	TRF-like 7	0.787517	0.295709	0.669893	0.708011	0.660899	0.364371	0.584373	0.57776	N.S.	1.006	0.009	0.9816	1.12804	0.940239	0.954959	0.874178	0.742853	0.845782	1.00774	0.820938	N.S.	0.995	-0.007	0.95745	Non-Target	NO	NO	NO	NO	NO	NO	NO	1581	1581	0.41	0.41	0.41
AT1G06920	A0A178WB00, F4HNU8	OFP4	ATOFP4, OFP4	ovate family protein 4	0	0.107974	0	0	0	0.177672	0.0359914	0.0592241	N.A.	N.A.	N.A.	N.A.	0.0314357	0.0295918	0	0	0	0	0.0203425	0	N.A.	N.A.	N.A.	N.A.	N.A.	NO	NO	NO	NO	NO	NO	NO	1227	1227	0.37	0.37	0.37
AT1G06923	Q1G3W7	AT1G06923		transcription repressor OFP17-like protein	2.6837	3.21043	3.19732	3.26241	3.31842	3.80572	3.03049	3.46218	N.S.	1.48	0.565	0.07618	2.0943	2.02155	2.40514	1.70929	1.37072	0.690613	2.17366	1.25687	DOWN	0.607	-0.721	5.3e-06	Non-Target	NO	NO	NO	NO	NO	NO	NO	817	817	0.384	0.384	0.384
AT1G06925	F4HNV0	AT1G06925		endonuclease/glycosyl hydrolase	0	0	0.248768	0	0	0	0.0829225	0	N.A.	N.A.	N.A.	N.A.	0.469682	0	0.774034	0	0.179883	0	0.414572	0.0599609	N.A.	N.A.	N.A.	N.A.	N.A.	NO	NO	NO	NO	NO	NO	NO	432	432	0.472	0.472	0.472
AT1G06930	Q5BQ22	AT1G06930		TPRXL	2.49856	2.06395	1.17952	1.71229	1.84207	1.71877	1.91401	1.75771	N.S.	0.878	-0.187	0.58564	2.31356	2.29128	2.15892	2.10142	2.30257	2.27361	2.25459	2.22587	N.S.	0.878	-0.188	0.27555	Non-Target	NO	NO	NO	NO	NO	NO	NO	1041	1041	0.383	0.383	0.383
AT1G06950	Q8LPR9	TIC110	ATTIC110, TIC110	translocon at the inner envelope membrane of chloroplasts 110	2.31078	2.21379	2.31049	2.32844	2.07564	1.94185	2.27835	2.11531	N.S.	0.917	-0.124	0.63323	2.6445	2.66287	2.97994	2.84951	3.12692	3.26725	2.76244	3.08123	1/1.5<=FC<=1.5	1.239	0.309	1.3e-05	STRINGENT	3UTR	YES	YES	3UTR	3UTR	3UTR	Stop codon	3441	3441	0.446	0.446	0.446
AT1G06960	A0A178WJJ4, A0A1P8AQK9, A0A1P8AQM1, A0A1P8AQQ1, Q8H1S6, Q8H1S6-2, Q8H1S6-3	AT1G06960	U2BL	RNA-binding (RRM/RBD/RNP motifs) family protein	2.53741	2.56051	2.14903	2.1215	1.91545	2.19063	2.41565	2.07586	N.S.	0.781	-0.357	0.21029	2.3912	2.39175	2.3633	2.26783	2.29731	1.88548	2.38208	2.15021	N.S.	0.969	-0.046	0.6609	Non-Target	NO	NO	NO	NO	NO	NO	Stop codon	944, 1107, 1130, 1224, 1248	1248	0.414, 0.427, 0.41, 0.415, 0.407, 0.411	0.427	0.414
AT1G06970	Q9LMJ1	CHX14	ATCHX14, CHX14	cation/hydrogen exchanger 14	0.0373574	0.0864804	0	0.0525517	0.0728117	0.109065	0.0412793	0.0781428	N.A.	N.A.	N.A.	N.A.	0.02289	0	0.0580236	0.0542116	0.115741	0	0.0269712	0.0566509	N.A.	N.A.	N.A.	N.A.	N.A.	NO	NO	NO	NO	NO	NO	NO	2885	2885	0.462	0.462	0.462
AT1G06980	Q9LMJ2	AT1G06980		6,7-dimethyl-8-ribityllumazine synthase	1.1118	0.60272	0.894058	1.24783	1.00623	1.09856	0.869525	1.11754	N.S.	1.222	0.289	0.40783	2.17228	1.83125	1.85543	2.17072	1.92402	1.89721	1.95299	1.99731	N.S.	1.06	0.085	0.61819	Non-Target	NO	NO	NO	NO	NO	NO	NO	1039	1039	0.409	0.409	0.409
AT1G07000	Q9LMJ4	EXO70B2	ATEXO70B2, EXO70B2	exocyst subunit exo70 family protein B2	2.79071	2.67574	2.74613	2.62981	2.59746	2.83033	2.73753	2.68586	N.S.	1.012	0.017	0.9518	2.47772	2.33564	2.57235	2.67837	2.33164	2.48226	2.4619	2.49742	N.S.	0.933	-0.099	0.2129	Non-Target	NO	NO	NO	NO	NO	NO	NO	2276	2276	0.451	0.451	0.451
AT1G07010	F4HNW0, F4HNW2, Q8L774	SLP1	AtSLP1, SLP1	Calcineurin-like metallo-phosphoesterase superfamily protein	0.368313	0.53178	0.337332	0.191299	0.257846	0.139528	0.412475	0.196224	N.A.	N.A.	N.A.	N.A.	1.3518	1.29019	1.41165	1.54085	1.91388	1.41246	1.35121	1.6224	1/1.5<=FC<=1.5	1.264	0.338	3.4e-05	N.A.	3UTR,3UTR,3UTR	NO	NO	NO	NO	3UTR	NO	1542, 1556, 1622	1622	0.432, 0.434, 0.435	0.435	0.434
AT1G07020	Q8LCS6, Q9LMJ6	AT1G07020		hypothetical protein	3.78494	3.56386	3.44913	3.93326	3.79346	3.7923	3.59931	3.83967	N.S.	1.315	0.395	0.05598	4.39452	4.32748	4.24392	4.29855	4.20432	3.98877	4.32197	4.16388	1/1.5<=FC<=1.5	0.809	-0.305	8.8e-05	Non-Target	NO	NO	NO	NO	NO	NO	NO	819	819	0.441	0.441	0.441
AT1G07025	F4HNW4	AT1G07025		Mitochondrial substrate carrier family protein	0	0	0	0.605161	0.457241	0	0	0.354134	N.A.	N.A.	N.A.	N.A.	N.E.	N.E.	N.E.	N.E.	N.E.	N.E.	N.E.	N.E.	N.E.	N.E.	N.E.	N.E.	N.A.	NO	NO	NO	NO	NO	NO	NO	501	501	0.489	0.489	0.489
AT1G07030	Q8L6Z2, Q9LMJ6	AT1G07030		Mitochondrial substrate carrier family protein	3.81106	3.88629	4.03829	3.76559	3.97087	4.00891	3.91188	3.91512	N.S.	1.055	0.077	0.77762	3.71604	3.82827	3.82706	3.82126	3.77998	3.82597	3.79046	3.80907	N.S.	0.947	-0.078	0.39799	PERMISSIVE	NO	YES	YES	5UTR	3UTR	NO	NO	1493	1493	0.452	0.452	0.452
AT1G07040	Q9LMJ7	AT1G07040		plant/protein	2.82764	2.85569	3.27406	2.22584	2.68907	2.75539	2.9858	2.55677	N.S.	0.738	-0.438	0.14178	2.45882	2.58017	2.75701	2.77786	2.79262	2.87923	2.59867	2.81657	N.S.	0.952	-0.07	0.38161	Non-Target	NO	NO	NO	3UTR	3UTR	3UTR	Stop codon	1774	1774	0.415	0.415	0.415
AT1G07050	A0A384LL58, Q8LDM8, Q9LMJ8	AT1G07050	FITNESS	CCT motif family protein	0.0707902	0	0	0	0	0	0.0235967	0	N.A.	N.A.	N.A.	N.A.	0	0.0348699	0.0926357	0	0	0	0.0425019	0	N.A.	N.A.	N.A.	N.A.	Non-Target	NO	NO	NO	NO	NO	NO	NO	855, 1596	1596	0.358, 0.375	0.375	0.366
AT1G07060	A0A178WMU9, A0A1P8AU91, A0A1P8AU93, Q8RX33, Q8RX33-2	DFO	ATDFO, DFO	hypothetical protein	0	0.143504	0	0	0	0	0.0478345	0	N.A.	N.A.	N.A.	N.A.	0.336565	0.152816	0.140204	0.189804	0.091199	0.60658	0.209862	0.295861	N.A.	N.A.	N.A.	N.A.	N.A.	NO	NO	NO	NO	NO	NO	NO	678, 733, 943, 1141	1141	0.396, 0.409, 0.412, 0.402	0.412	0.405
AT1G07070	A0A178W946, Q9LMK0	AT1G07070		Ribosomal protein L35Ae family protein	3.58504	3.01317	2.78363	1.91244	1.72315	1.80313	3.12728	1.81291	DOWN	0.26	-1.944	1.1e-07	5.05295	4.93013	4.91155	4.29862	4.29597	4.28742	4.96487	4.294	DOWN	0.518	-0.948	1.5e-11	PERMISSIVE	NO	YES	YES	NO	NO	NO	NO	684	684	0.417	0.417	0.417
AT1G07080	Q93VQ6, Q9LMK1	AT1G07080		Thioredoxin superfamily protein	4.24484	4.01177	4.18558	3.79866	3.7707	3.87593	4.1474	3.81509	1/1.5<=FC<=1.5	0.777	-0.364	0.04937	4.31218	4.4276	4.39768	4.55577	4.70458	4.76782	4.37915	4.67606	N.S.	0.991	-0.012	0.88051	STRINGENT	3UTR	YES	YES	NO	3UTR	3UTR	Stop codon	1223	1223	0.441	0.441	0.441
AT1G07090	Q9LMK2	LSH6	LSH6	LIGHT-DEPENDENT SHORT HYPOCOTYLS-like protein (DUF640)	0.806627	0.870792	0.647707	1.17109	1.68751	1.62627	0.775042	1.49495	UP	2.635	1.398	0.00483	2.77269	3.13611	3.11281	3.25983	3.39777	3.32053	3.0072	3.32605	N.S.	1.103	0.142	0.22162	Non-Target	NO	NO	NO	NO	NO	NO	NO	943	943	0.463	0.463	0.463
AT1G07110	Q9MB58	F2KP	ATF2KP, F2KP, FKFBP	fructose-2,6-bisphosphatase	2.40321	2.36473	2.36822	2.14905	2.18662	2.21484	2.37872	2.1835	N.S.	0.876	-0.191	0.38543	2.19833	2.07833	2.50089	2.51449	2.64249	2.76006	2.25918	2.63901	1/1.5<=FC<=1.5	1.18	0.239	0.00864	STRINGENT	3UTR	YES	NO	NO	3UTR	3UTR	Stop codon	2789	2789	0.429	0.429	0.429
AT1G07120	A0A1P8AWM2, Q9LMK4	AT1G07120		CHUP1-like protein	0.583254	0	0.184211	0.269422	0.359384	0.162048	0.255822	0.263618	N.A.	N.A.	N.A.	N.A.	0.457302	0.557048	0.632516	0.572589	0.601079	0.517976	0.548955	0.563881	N.S.	0.923	-0.115	0.39258	Non-Target	NO	NO	NO	NO	NO	NO	NO	1025, 1341	1341	0.422, 0.432	0.432	0.427
AT1G07130	Q9LMK5	1	ATSTN1, STN1	Nucleic acid-binding, OB-fold-like protein	2.18275	1.95436	2.35505	3.00732	3.07886	2.96355	2.16405	3.01657	UP	2.494	1.318	7.4e-07	2.86326	2.90619	2.77498	3.0104	2.76279	2.62646	2.84814	2.79988	N.S.	0.949	-0.076	0.36904	Non-Target	NO	NO	NO	NO	NO	NO	NO	958	958	0.437	0.437	0.437
AT1G07135	Q9LMK6	AT1G07135		glycine-rich protein	2.74352	2.83159	2.81389	4.16859	3.83802	3.90489	2.79633	3.9705	UP	3.535	1.822	8.4e-16	1.02787	0.595404	0.917405	1.256	1.12007	0.617041	0.846893	0.997703	UP	1.674	0.743	0.00165	Non-Target	NO	NO	NO	NO	NO	NO	NO	908	908	0.427	0.427	0.427
AT1G07140	Q9LMK7	SIRANBP	SIRANBP	Pleckstrin homology (PH) domain superfamily protein	5.733	5.56443	5.61492	5.50533	5.61255	5.61213	5.63745	5.57667	N.S.	1.005	0.007	0.97736	5.56743	5.61387	5.57966	5.54003	5.50492	5.51848	5.58699	5.52114	1/1.5<=FC<=1.5	0.845	-0.243	0.00117	STRINGENT	3UTR	YES	YES	3UTR	3UTR	3UTR	3' UTR	1516	1516	0.408	0.408	0.408
AT1G07150	F4HNX7, Q9LMK8	MAPKKK13	MAPKKK13	mitogen-activated protein kinase kinase kinase 13	4.00903	4.38118	4.69909	4.13959	4.67447	4.47384	4.3631	4.4293	N.S.	1.074	0.103	0.75722	1.73715	1.82738	2.23909	1.72365	1.66812	1.8323	1.93454	1.74136	1/1.5<=FC<=1.5	0.85	-0.234	0.02451	Non-Target	NO	NO	NO	NO	NO	NO	NO	1586, 1718	1718	0.469, 0.462	0.469	0.466
AT1G07160	Q8RX37	AT1G07160		Protein phosphatase 2C family protein	1.18815	0.724265	1.31301	0.888862	1.72295	1.53099	1.07514	1.38094	N.S.	1.322	0.402	0.2598	0.697028	0.570272	0.727957	0.737366	0.321704	0.45291	0.665086	0.503994	N.S.	0.839	-0.254	0.14413	N.A.	NO	NO	NO	NO	NO	NO	NO	1539	1539	0.44	0.44	0.44
AT1G07170	P0DI19	AT1G07170		PHF5-like protein	3.75561	3.55406	3.44919	3.11972	3.25167	3.21359	3.58628	3.19499	1/1.5<=FC<=1.5	0.738	-0.439	0.04315	3.75115	3.67411	3.67475	3.50197	3.33621	3.34892	3.7	3.3957	1/1.5<=FC<=1.5	0.745	-0.425	2.9e-09	PERMISSIVE	NO	YES	YES	NO	CDS, 3UTR	3UTR	NO	535, 633, 766, 778, 858, 935	935	0.41, 0.409, 0.408, 0.405, 0.421, 0.411	0.421	0.411
AT1G07175	A0A384KK61, B3H674	AT1G07175		alternative NAD(P)H dehydrogenase	4.59978	4.04643	3.72549	3.14758	3.34681	3.37002	4.1239	3.28814	DOWN	0.471	-1.087	0.00052	2.56001	2.24333	2.53427	1.86007	2.03859	2.3023	2.44587	2.06699	N.S.	1	0	0.99984	Non-Target	NO	NO	NO	NO	NO	NO	NO	493, 612	612	0.363, 0.369	0.369	0.366
AT1G07180	Q8GWA1	NDA1	ATNDI1, NDA1	alternative NAD(P)H dehydrogenase 1	0.615247	0.0593052	0.245654	0	0.22761	0.271522	0.306735	0.166377	N.A.	N.A.	N.A.	N.A.	0.369691	0.462615	0.354584	1.45379	1.30484	1.49223	0.39563	1.41695	UP	5.946	2.572	< 2e-16	Non-Target	NO	NO	NO	NO	3UTR	NO	NO	2169	2169	0.428	0.428	0.428
AT1G07200	Q8RWE4, Q9LML2	AT1G07200	SMXL6	Double Clp-N motif-containing P-loop nucleoside triphosphate hydrolases superfamily protein	2.40007	2.65078	2.82926	2.58283	2.7727	2.53448	2.6267	2.63	N.S.	1.037	0.053	0.86714	2.00873	2.12356	2.40047	2.48461	2.42906	2.22128	2.17759	2.37832	N.S.	0.991	-0.012	0.93379	Non-Target	NO	NO	NO	NO	NO	NO	NO	2214, 3898	3898	0.43, 0.423	0.43	0.426
AT1G07210	Q9LML3	AT1G07210		Ribosomal protein S18	3.77429	3.28148	3.26348	3.21442	3.21538	3.24388	3.43975	3.22456	N.S.	0.862	-0.214	0.39286	4.48518	4.43166	4.40276	4.31112	4.35742	4.31106	4.43987	4.32653	1/1.5<=FC<=1.5	0.831	-0.267	0.00297	PERMISSIVE	NO	YES	NO	NO	3UTR	NO	3' UTR	1204	1204	0.419	0.419	0.419
AT1G07220	Q9LML4	AT1G07220		O-glucosyltransferase rumi-like protein (DUF821)	1.52554	1.37738	1.54223	2.2134	1.78528	1.82642	1.48172	1.9417	UP	1.752	0.809	0.00616	1.88317	1.85391	2.01128	2.0579	1.99928	2.31907	1.91612	2.12542	1/1.5<=FC<=1.5	1.151	0.202	0.00242	Non-Target	NO	NO	NO	NO	NO	NO	NO	1942	1942	0.424	0.424	0.424
AT1G07230	Q8L7Y9	NPC1	NPC1	non-specific phospholipase C1	2.43832	2.18356	2.30513	1.98509	1.57527	1.76353	2.309	1.77463	DOWN	0.624	-0.681	0.00746	2.3814	2.48455	2.76011	2.75217	2.83098	3.16173	2.54202	2.91496	N.S.	1.084	0.116	0.2187	Non-Target	NO	NO	NO	NO	3UTR	NO	Stop codon	2170	2170	0.442	0.442	0.442
AT1G07240	Q9FE68	UGT71C5	UGT71C5	UDP-glucosyl transferase 71C5	2.39351	2.29708	2.34697	3.12225	2.78559	2.71006	2.34585	2.87263	UP	1.823	0.866	0.00022	2.74426	2.82034	2.96195	2.93444	3.1215	3.27027	2.84218	3.10874	1/1.5<=FC<=1.5	1.248	0.32	0.00166	Non-Target	NO	NO	NO	NO	NO	NO	NO	1900	1900	0.447	0.447	0.447
AT1G07250	Q9LML6	UGT71C4	UGT71C4	UDP-glucosyl transferase 71C4	2.34353	1.91684	1.94587	2.2375	2.25078	2.0367	2.06874	2.17499	N.S.	1.144	0.195	0.48308	3.77681	3.91206	3.91532	4.13336	4.03777	4.15442	3.86806	4.10852	N.S.	0.978	-0.032	0.73842	Non-Target	NO	NO	NO	NO	NO	NO	NO	1850	1850	0.462	0.462	0.462
AT1G07260	Q9LML7	UGT71C3	UGT71C3	UDP-glucosyl transferase 71C3	2.35741	2.11038	2.118	3.02275	2.61392	2.73619	2.19526	2.79095	UP	1.962	0.972	5.7e-05	2.38956	2.17155	2.43176	2.57184	2.71999	2.69942	2.33096	2.66375	N.S.	1.13	0.176	0.14517	Non-Target	NO	NO	NO	NO	NO	NO	NO	1764	1764	0.469	0.469	0.469
AT1G07270	A0A178WHF4, A0A1P8AUT2, Q8W032	AT1G07270	CDC6b	Cell division control, Cdc6	0.55995	0.294351	0.0484139	0.0871525	0.119922	0	0.300905	0.0690248	N.A.	N.A.	N.A.	N.A.	0.769878	0.592382	0.63532	0.47411	0.660404	0.563653	0.66586	0.566056	N.S.	0.918	-0.124	0.40998	Non-Target	NO	NO	NO	NO	NO	NO	NO	1769, 1951	1951	0.406, 0.407	0.407	0.406
AT1G07280	A0A1P8AMQ5, Q8VZC8	AT1G07280		Tetratricopeptide repeat (TPR)-like superfamily protein	1.06209	0.503324	0.483515	1.10113	0.881131	0.822143	0.682977	0.934801	N.S.	1.279	0.355	0.31485	1.2758	1.33774	1.58084	1.49907	1.57624	1.63622	1.39813	1.57051	1/1.5<=FC<=1.5	1.317	0.397	0.0001	Non-Target	NO	NO	NO	NO	3UTR	3UTR	Stop codon	2022, 2154, 2414, 2735	2735	0.416, 0.429, 0.408, 0.423	0.429	0.419
AT1G07290	A0A2H1ZEA3	GONST2	GONST2	golgi nucleotide sugar transporter 2	1.42242	0.685878	0.523541	0.258315	0.49962	0.541793	0.87728	0.433243	N.S.	0.581	-0.785	0.08056	2.1106	1.972	1.92372	1.73265	1.6408	1.81278	2.0021	1.72874	N.S.	0.914	-0.13	0.27155	Non-Target	NO	NO	NO	NO	NO	NO	NO	1901	1901	0.419	0.419	0.419
AT1G07300	A0A1P8ARC6, A0A1P8ARD0, Q6NPG3	AT1G07300		josephin protein-like protein	1.47385	1.2663	1.78837	1.73799	1.7468	1.77305	1.50951	1.75261	N.S.	1.222	0.29	0.38973	1.73228	1.93102	2.02046	1.8454	1.81829	1.54527	1.89459	1.73632	N.S.	0.875	-0.193	0.17969	Non-Target	NO	NO	NO	NO	NO	NO	NO	720, 961, 1082	1082	0.4, 0.379, 0.404	0.404	0.394
AT1G07310	Q9LNV0	AT1G07310		Calcium-dependent lipid-binding (CaLB domain) family protein	3.45911	3.45967	3.44438	3.60135	3.43308	3.59516	3.45439	3.5432	N.S.	1.151	0.203	0.31552	2.92493	3.13017	3.24554	3.39176	3.55031	3.82338	3.10021	3.58848	N.S.	1.145	0.195	0.0842	Non-Target	NO	NO	NO	NO	NO	NO	NO	1850	1850	0.466	0.466	0.466
AT1G07320	O50061, Q2V4Q4, Q3EDH2	RPL4	EMB2784, PRPL4, RPL4	ribosomal protein L4	1.40027	0.82107	1.04567	1.3669	0.702854	0.734972	1.08901	0.934909	N.S.	0.951	-0.073	0.84227	3.34326	3.50706	3.6269	3.47806	3.4878	3.45859	3.49241	3.47482	1/1.5<=FC<=1.5	0.75	-0.415	3.5e-06	STRINGENT	3UTR,3UTR,3UTR	YES	YES	3UTR	3UTR	3UTR	Stop codon	1058, 1211, 1238, 1412	1412	0.444, 0.452, 0.464, 0.456	0.464	0.454
AT1G07330	F4HQL7, Q9LNV2	AT1G07330		dentin sialophosphoprotein	0	0	0	0.0518331	0	0.046603	0	0.0328121	N.A.	N.A.	N.A.	N.A.	N.E.	N.E.	N.E.	N.E.	N.E.	N.E.	N.E.	N.E.	N.E.	N.E.	N.E.	N.E.	N.A.	NO	NO	NO	NO	NO	NO	NO	2351, 2924	2924	0.38, 0.4	0.4	0.39
AT1G07340	Q9LNV3	STP2	ATSTP2, STP2	sugar transporter 2	0	0	0.050963	0.0468702	0	0.0660489	0.0169877	0.0376397	N.A.	N.A.	N.A.	N.A.	N.E.	N.E.	N.E.	N.E.	N.E.	N.E.	N.E.	N.E.	N.E.	N.E.	N.E.	N.E.	N.A.	NO	NO	NO	NO	NO	NO	NO	1686	1686	0.438	0.438	0.438
AT1G07350	A0A1P8AVR1, A0A1P8AVT0, Q84TH4, Q84TH4-2, Q84TH4-3, Q84TH4-4	SR45a	SR45a	RNA-binding (RRM/RBD/RNP motifs) family protein	4.54645	4.87066	4.79126	5.06119	5.14205	5.15683	4.73612	5.12002	1/1.5<=FC<=1.5	1.475	0.561	0.01084	3.67555	3.1393	3.25562	3.54559	3.43299	3.28958	3.35682	3.42272	N.S.	1.039	0.055	0.70405	PERMISSIVE	NO	YES	NO	3UTR	NO	3UTR	Stop codon	1573, 1590, 1737, 1816, 1860, 1973	1973	0.455, 0.464, 0.451, 0.439, 0.46, 0.441	0.464	0.452
AT1G07360	Q9LNV5	MAC5A	MAC5A	CCCH-type zinc fingerfamily protein with RNA-binding domain-containing protein	4.11568	4.30332	4.44905	4.27027	4.38875	4.44091	4.28935	4.36664	N.S.	1.112	0.153	0.54667	3.56474	3.48226	3.56734	3.81985	3.92165	3.98768	3.53811	3.90973	1/1.5<=FC<=1.5	1.162	0.216	0.01169	Non-Target	NO	NO	NO	3UTR	NO	NO	NO	1819	1819	0.449	0.449	0.449
AT1G07370	Q9M7Q7	PCNA1	ATPCNA1, PCNA1	proliferating cellular nuclear antigen 1	2.43552	1.87304	1.80497	1.69216	1.09697	1.4359	2.03785	1.40834	DOWN	0.584	-0.775	0.037	4.32655	4.26465	4.1842	4.12931	4.06481	4.17103	4.25847	4.12171	N.S.	0.834	-0.262	0.08276	Non-Target	NO	NO	NO	NO	NO	NO	NO	1130	1130	0.436	0.436	0.436
AT1G07380	A0A1P8APY2, F4HQM3	AT1G07380	AtNCER1	Neutral/alkaline non-lysosomal ceramidase	1.99762	1.91568	1.8629	2.12998	1.81773	1.9971	1.9254	1.9816	N.S.	1.123	0.167	0.51809	1.99683	2.07119	2.2994	2.37162	2.51273	2.46731	2.12247	2.45056	1/1.5<=FC<=1.5	1.172	0.23	0.00123	Non-Target	NO	NO	NO	NO	NO	NO	NO	2496, 2773	2773	0.435, 0.438	0.438	0.436
AT1G07390	A0A1P8AUZ5, F4HQM4, F4HQM5, Q9LNV9, Q9LNV9-2	RLP1	AtRLP1, RLP1	receptor like protein 1	0.0793138	0	0	0.046266	0.0641844	0	0.0264379	0.0368168	N.A.	N.A.	N.A.	N.A.	0.283615	0.241696	0.307672	0.372848	0.302101	0.379885	0.277661	0.351611	N.S.	1.187	0.247	0.08275	Non-Target	NO	NO	NO	NO	NO	NO	NO	3267, 3304, 3418, 3451, 3615	3615	0.393, 0.394, 0.398, 0.399, 0.392	0.399	0.395
AT1G07400	Q9LNW0	AT1G07400		HSP20-like chaperones superfamily protein	4.32503	5.73389	4.94706	6.20234	6.35423	6.60265	5.002	6.3864	UP	2.557	1.355	0.01705	2.36597	1.55422	1.25551	2.36628	2.25982	2.01229	1.72523	2.2128	UP	1.543	0.625	0.00466	Non-Target	NO	NO	NO	NO	NO	NO	NO	858	858	0.45	0.45	0.45
AT1G07410	Q9LNW1	RABA2b	ATRAB-A2B, ATRABA2B, RAB-A2B, RABA2b	RAB GTPase homolog A2B	3.10275	3.01681	2.72396	2.77546	2.67476	2.70453	2.94784	2.71825	N.S.	0.858	-0.221	0.3763	3.26711	2.96575	2.90628	2.75767	2.45801	2.6115	3.04638	2.60906	DOWN	0.652	-0.616	1.3e-07	Non-Target	NO	NO	NO	NO	NO	NO	NO	1148	1148	0.391	0.391	0.391
AT1G07420	Q8VWZ8, Q8VWZ8-2	SMO2-1	ATSMO1, SMO2-1	sterol 4-alpha-methyl-oxidase 2-1	4.4935	4.34553	4.28586	4.30433	4.08626	4.09939	4.37496	4.16333	N.S.	0.877	-0.19	0.32944	3.65314	3.67552	3.64274	3.57289	3.69748	3.73396	3.65714	3.66811	N.S.	0.913	-0.131	0.27032	PERMISSIVE	NO	YES	YES	3UTR	3UTR	NO	3' UTR	1392, 1625	1625	0.399, 0.411	0.411	0.405
AT1G07430	Q9LNW3	HAI2	AIP1, AtAIP1, HAI2, HON	highly ABA-induced PP2C protein 2	0.896368	0.752884	0.673174	1.85885	1.74047	1.30533	0.774142	1.63488	UP	3.529	1.819	2.9e-06	0.0183948	0	0	0.12536	0.0755489	0.105374	0.00613159	0.102094	N.A.	N.A.	N.A.	N.A.	Non-Target	NO	NO	NO	NO	NO	NO	NO	1906	1906	0.445	0.445	0.445
AT1G07440	F4HQN3, P0DKI3	AT1G07440		NAD(P)-binding Rossmann-fold superfamily protein	0	0	0	0	0.336838	0.096967	0	0.144602	N.A.	N.A.	N.A.	N.A.	0.344229	0.281971	0.339382	0.445581	1.02628	0.693285	0.321861	0.721714	N.S.	0.948	-0.077	0.6643	Non-Target	NO	NO	NO	NO	3UTR	3UTR	NO	752, 1178	1178	0.417, 0.406	0.417	0.412
AT1G07450	Q8RX32	AT1G07450		NAD(P)-binding Rossmann-fold superfamily protein	0	0	0	0.0853976	0	0	0	0.0284659	N.A.	N.A.	N.A.	N.A.	0	0	0	0	0.206237	0	0	0.0687458	N.A.	N.A.	N.A.	N.A.	Non-Target	NO	NO	NO	NO	NO	NO	NO	975	975	0.409	0.409	0.409
AT1G07460	Q4PT39, Q9LNW6	AT1G07460		Concanavalin A-like lectin family protein	0.234465	0.150847	0.193749	0.544079	0.128199	0.543463	0.19302	0.405247	N.A.	N.A.	N.A.	N.A.	0.115935	0.0740856	0.161544	0.217562	0.229006	0	0.117188	0.148856	N.A.	N.A.	N.A.	N.A.	N.A.	NO	NO	NO	NO	NO	NO	NO	901, 1019	1019	0.42	0.42	0.42
AT1G07470	Q93VP4	AT1G07470		Transcription factor IIA, alpha/beta subunit	3.9175	3.93468	3.92207	3.50901	3.4787	3.52713	3.92475	3.50495	1/1.5<=FC<=1.5	0.712	-0.49	0.00538	3.00446	3.17368	3.27737	3.23839	3.22246	3.43115	3.15184	3.29733	1/1.5<=FC<=1.5	0.915	-0.128	0.03145	PERMISSIVE	NO	YES	NO	NO	3UTR	3UTR	Stop codon	1508, 1690	1690	0.447, 0.456	0.456	0.452
AT1G07473	Q9LNW8	AT1G07473		hypothetical protein	0.125523	0.27467	0.0986881	0	0.235459	0.238982	0.166294	0.158147	N.A.	N.A.	N.A.	N.A.	0.0899458	0.0845103	0.0394409	0.105557	0.0479641	0.244936	0.071299	0.132819	N.A.	N.A.	N.A.	N.A.	N.A.	NO	NO	NO	NO	NO	NO	NO	924	924	0.425	0.425	0.425
AT1G07476	A0A178WPU8, Q9LNX0	AT1G07476		transmembrane protein	0.233141	0	0.239732	0.118158	0.295231	0.425491	0.157625	0.279627	N.A.	N.A.	N.A.	N.A.	0.0872093	0	0.0750351	0.0525298	0.0465037	0	0.0540815	0.0330112	N.A.	N.A.	N.A.	N.A.	N.A.	NO	NO	NO	NO	NO	NO	NO	747	747	0.43	0.43	0.43
AT1G07480	A0A1P8APF4, O49349	AT1G07480		Transcription factor IIA, alpha/beta subunit	3.41329	3.25307	3.42324	3.3412	3.22002	3.40785	3.3632	3.32302	N.S.	1.02	0.028	0.91556	2.90488	2.80858	3.08844	3.18226	3.27925	3.25919	2.93397	3.24023	N.S.	0.995	-0.008	0.9341	Non-Target	NO	NO	NO	NO	NO	3UTR	3' UTR	1307, 2046, 2066	2066	0.449, 0.452, 0.471	0.471	0.457
AT1G07485	Q67XE6	AT1G07485		hypothetical protein	0	0	0	0.133855	0	0	0	0.0446183	N.A.	N.A.	N.A.	N.A.	0.990021	0.498912	0.399866	0.609375	0.731641	0	0.6296	0.447005	N.S.	0.96	-0.059	0.631	Non-Target	NO	NO	NO	NO	NO	NO	NO	662	662	0.387	0.387	0.387
AT1G07490	Q6IM92	RTFL3	DVL9, RTFL3	ROTUNDIFOLIA like 3	0.34983	0	0	0.138893	0.34774	0.352594	0.11661	0.279742	N.A.	N.A.	N.A.	N.A.	0	0.822564	0.502404	0	0	1.08087	0.441656	0.36029	N.S.	1.027	0.038	0.76151	Non-Target	NO	NO	NO	NO	NO	NO	NO	642	642	0.396	0.396	0.396
AT1G07500	Q9LNX4	AT1G07500	SMR5	hypothetical protein	0	0	0	0	0	1.63618	0	0.545392	N.S.	1.05	0.071	0.37428	5.52446	5.27599	4.91994	5.47518	5.13994	4.58175	5.24013	5.06563	N.S.	0.882	-0.181	0.13543	Non-Target	NO	NO	NO	NO	NO	NO	NO	266	266	0.519	0.519	0.519
AT1G07510	Q8VZI8	ftsh10	AtFTSH10, FTSH10	FTSH protease 10	2.37037	2.3211	2.36365	2.42191	2.44589	2.46197	2.3517	2.44326	N.S.	1.161	0.215	0.24761	2.85268	2.87783	2.96775	3.21903	3.37506	3.42174	2.89942	3.33861	1/1.5<=FC<=1.5	1.292	0.37	2.3e-10	Non-Target	NO	NO	NO	3UTR	NO	NO	NO	6715	6715	0.429	0.429	0.429
AT1G07520	A0A1P8AT66, A0A384L9U8, Q3EDH0, Q3EDH0-2	AT1G07520		GRAS family transcription factor	0.0492596	0.157449	0	0.45832	0.405048	0	0.0689028	0.287789	N.A.	N.A.	N.A.	N.A.	2.08868	2.09919	2.29478	2.59187	2.60016	2.81393	2.16088	2.66865	1/1.5<=FC<=1.5	1.242	0.313	1.4e-09	N.A.	NO	NO	NO	NO	NO	NO	NO	2217, 2242, 2593, 2850	2850	0.422, 0.418, 0.424, 0.43	0.43	0.424
AT1G07530	Q9XE58	SCL14	ATGRAS2, GRAS2, SCL14	SCARECROW-like 14	2.66328	2.69469	2.64522	2.80644	2.70614	2.69055	2.66773	2.73438	N.S.	1.129	0.175	0.40884	2.42004	2.50474	2.61988	2.91762	2.91233	3.06438	2.51489	2.96478	N.S.	1.084	0.117	0.22544	Non-Target	NO	NO	NO	NO	NO	NO	NO	2826	2826	0.426	0.426	0.426
AT1G07560	C0LGD9	AT1G07560		Leucine-rich repeat protein kinase family protein	0.187537	0.218912	0.453	0.422885	0.426634	0.510489	0.286483	0.453336	N.A.	N.A.	N.A.	N.A.	1.14942	0.954848	1.23623	1.12499	1.15094	1.31188	1.1135	1.19594	N.S.	1.048	0.068	0.65313	Non-Target	NO	NO	NO	NO	NO	NO	NO	2673	2673	0.401	0.401	0.401
AT1G07570	A0A1P8ANC9, F4HQQ0, Q06548	APK1A	APK1, APK1A	Protein kinase superfamily protein	2.15363	2.00826	2.0388	2.88394	2.77992	2.48552	2.0669	2.71646	UP	2.109	1.076	7.1e-06	2.04975	2.01459	2.12032	2.22357	2.13541	2.01917	2.06155	2.12605	1/1.5<=FC<=1.5	0.893	-0.164	0.01968	Non-Target	NO	NO	NO	3UTR	NO	NO	NO	1702, 1771, 1796, 1800, 1801	1801	0.423, 0.429, 0.426, 0.431, 0.434	0.434	0.429
AT1G07590	Q940Q2	AT1G07590		Tetratricopeptide repeat (TPR)-like superfamily protein	6.03137	6.39537	6.60227	6.1685	6.74878	6.58848	6.343	6.50192	N.S.	1.172	0.228	0.44828	8.08993	8.07999	8.23298	7.93934	7.38329	7.08643	8.1343	7.46968	1/1.5<=FC<=1.5	0.717	-0.479	0.001	STRINGENT	5UTR	NO	YES	NO	5UTR	5UTR	NO	2407	2407	0.405	0.405	0.405
AT1G07600	P43392	MT1A	ATMT-2, ATMT-Q, ATMT1, LSR4, MT-Q, MT1, MT1A	metallothionein 1A	6.88141	7.40194	7.60669	7.03487	7.71331	7.50038	7.29668	7.41619	N.S.	1.116	0.159	0.62568	3.19144	2.66374	3.26269	2.91653	2.50379	2.73512	3.03929	2.71848	N.S.	0.849	-0.235	0.19043	N.A.	NO	NO	NO	NO	NO	NO	NO	138	138	0.478	0.478	0.478
AT1G07610	Q38804	MT1C	MT1C	metallothionein 1C	5.76721	5.99674	6.31919	5.66652	6.06827	6.10687	6.02771	5.94722	N.S.	0.976	-0.035	0.91719	7.91372	7.53573	7.89524	7.40512	7.09373	6.99693	7.78156	7.16526	N.S.	0.958	-0.062	0.71892	Non-Target	NO	NO	NO	NO	NO	5UTR	NO	577	577	0.34	0.34	0.34
AT1G07615	F4HSD4	AT1G07615	Obg A-1	GTP-binding protein Obg/CgtA	1.32438	0.756384	1.33264	1.46669	1.53715	1.20542	1.1378	1.40309	N.S.	1.277	0.353	0.29638	1.91845	1.90538	2.08839	2.19532	2.36495	2.34606	1.97074	2.30211	1/1.5<=FC<=1.5	1.259	0.332	9.8e-08	PERMISSIVE	NO	YES	NO	NO	NO	NO	NO	1675	1675	0.469	0.469	0.469
AT1G07620	A0A1P8AVB8, F4HSD5	ATOBGM	ATOBGM, TRM32	GTP-binding protein Obg/CgtA	0.294492	0.173741	0.0887359	0.665494	0.458783	0.435364	0.185656	0.51988	N.A.	N.A.	N.A.	N.A.	0.235313	0.134766	0.260235	0.0656145	0.219559	0.291584	0.210105	0.192252	N.A.	N.A.	N.A.	N.A.	Non-Target	NO	NO	NO	NO	NO	NO	NO	1881, 1972, 2100, 2155	2155	0.384, 0.392, 0.39, 0.389	0.392	0.389
AT1G07630	Q9LQN6	PLL5	PLL5	pol-like 5	2.44413	2.15757	2.22857	2.44687	2.23924	2.3274	2.27675	2.33784	N.S.	1.119	0.162	0.49553	2.33226	2.40924	2.62085	2.73725	2.6738	2.67997	2.45412	2.69701	1/1.5<=FC<=1.5	1.136	0.183	0.00934	Non-Target	NO	NO	NO	NO	NO	NO	NO	2625	2625	0.426	0.426	0.426
AT1G07640	Q2V4Q1, Q8L9V6, Q8L9V6-2	OBP2	OBP2, URP3	Dof-type zinc finger DNA-binding family protein	2.38807	2.3892	2.52962	3.4236	3.22787	3.04296	2.43563	3.23148	UP	2.411	1.27	7.7e-09	1.80034	1.77311	1.70259	2.0376	2.16464	2.1567	1.75868	2.11964	1/1.5<=FC<=1.5	1.302	0.381	1.1e-07	Non-Target	NO	NO	NO	NO	NO	NO	NO	2840, 2957, 3097	3097	0.367, 0.373, 0.369	0.373	0.37
AT1G07645	Q9LQP1	DSI-1VOC	ATDSI-1VOC, DSI-1VOC	dessication-induced 1VOC superfamily protein	0.522445	0.207876	0.476373	0.245991	0.679658	0.583059	0.402231	0.502903	N.A.	N.A.	N.A.	N.A.	0	0	0	0.18643	0.16658	0	0	0.11767	N.A.	N.A.	N.A.	N.A.	N.A.	NO	NO	NO	NO	NO	NO	NO	676	676	0.442	0.442	0.442
AT1G07650	A0A1P8APW9, A0A1P8AQ09, C0LGE0, C0LGE0-2, F4HSE1, Q56ZY0	AT1G07650		Leucine-rich repeat transmembrane protein kinase	1.4747	1.30569	1.22903	1.13868	0.99656	1.06479	1.33647	1.06668	N.S.	0.772	-0.373	0.16871	0.993779	1.00304	1.22797	1.182	1.56295	1.47093	1.07493	1.40529	1/1.5<=FC<=1.5	1.184	0.244	0.041	Non-Target	NO	NO	NO	NO	CDS	3UTR	NO	2658, 3431, 3501, 4064	4064	0.399, 0.41, 0.411, 0.409	0.411	0.407
AT1G07660	A0A178VER3, A8MRV1, P59259	AT1G07660		Histone superfamily protein	3.47813	3.2888	3.48486	3.90263	3.88044	3.73987	3.41726	3.84098	UP	1.581	0.661	0.0015	3.7167	3.79674	3.70908	3.88384	3.79873	3.43928	3.74084	3.70728	N.S.	0.975	-0.037	0.64755	Non-Target	NO	NO	NO	NO	NO	NO	NO	666, 722	722	0.411, 0.405	0.411	0.408
AT1G07670	Q9XES1	ECA4	ATECA4, ECA4	endomembrane-type CA-ATPase 4	4.21793	3.95049	3.75745	3.92693	3.98779	3.94774	3.97529	3.95415	N.S.	1.03	0.042	0.86594	3.63827	3.47914	3.70272	3.86086	4.06999	4.2776	3.60671	4.06948	1/1.5<=FC<=1.5	1.381	0.466	4e-08	Non-Target	NO	NO	NO	NO	3UTR	NO	NO	3632, 3682	3682	0.445, 0.443	0.445	0.444
AT1G07680	Q9LQP3	AT1G07680		transmembrane protein	0.171357	0.365185	0.135736	0.235741	0.442574	0.172828	0.224093	0.283715	N.A.	N.A.	N.A.	N.A.	0.0695746	0.0649456	0	0	0	0	0.0448401	0	N.A.	N.A.	N.A.	N.A.	N.A.	NO	NO	NO	NO	NO	NO	NO	702	702	0.386	0.386	0.386
AT1G07690	A0A1P8AP82, A0A1P8APA1, A0A1P8APA6, A0A1P8APC0, Q9LQP4	AT1G07690		transmembrane protein	0.424185	0.187115	0.657325	0.74954	1.02896	0.973556	0.422875	0.917351	N.S.	1.45	0.536	0.14172	0.738642	0.742402	0.924945	0.490167	0.511882	0	0.801996	0.334016	N.S.	1.017	0.024	0.89687	Non-Target	NO	NO	NO	NO	NO	NO	NO	589, 601, 742, 835, 847	847	0.371, 0.374, 0.399, 0.404, 0.383	0.404	0.386
AT1G07700	Q9C5C5, Q9C5C5-2, Q9C5C5-3	AT1G07700		Thioredoxin superfamily protein	1.83673	1.56233	1.66742	1.94146	1.73314	1.9098	1.68883	1.86146	N.S.	1.217	0.283	0.34765	3.35134	3.19557	3.34025	3.4727	3.42787	3.11882	3.29572	3.33979	N.S.	1.088	0.122	0.14163	STRINGENT	3UTR,3UTR,3UTR,3UTR	YES	YES	NO	3UTR	3UTR	Stop codon	1123, 1192, 1458, 1539	1539	0.406, 0.404, 0.399, 0.397	0.406	0.402
AT1G07705	A8MR45, Q0WP31	AT1G07705	NOT2a	NOT2 / NOT3 / NOT5 family	2.30135	1.80246	1.83957	1.60149	1.63821	1.44851	1.98112	1.56274	1/1.5<=FC<=1.5	0.681	-0.554	0.04497	2.26763	2.09824	2.42964	2.32817	2.50691	2.67735	2.26517	2.50414	1/1.5<=FC<=1.5	1.111	0.152	0.01323	Non-Target	NO	NO	NO	3UTR	NO	NO	3' UTR	2441, 2607	2607	0.421, 0.408	0.421	0.414
AT1G07710	Q9LQP7	AT1G07710		Ankyrin repeat family protein	0.689658	0.811221	0.622211	1.87205	1.43562	1.51882	0.707697	1.60883	UP	3.942	1.979	5.2e-07	1.08319	1.07689	1.01855	1.30012	1.39563	1.58062	1.05954	1.42546	1/1.5<=FC<=1.5	1.382	0.467	0.00032	Non-Target	NO	NO	NO	NO	NO	NO	NO	1765, 1825	1825	0.455	0.455	0.455
AT1G07720	A0A1P8AST0, Q9LQP8	KCS3	KCS3	3-ketoacyl-CoA synthase 3	0	0	0	0.0425507	0	0.0600221	0	0.0341909	N.A.	N.A.	N.A.	N.A.	0.061176	0.279831	0.312372	0.991289	1.75048	1.05975	0.217793	1.26717	1/1.5<=FC<=1.5	1.467	0.552	0.02911	Non-Target	NO	NO	NO	NO	NO	NO	NO	1846, 2098	2098	0.405, 0.415	0.415	0.41
AT1G07725	Q9LQP9	EXO70H6	ATEXO70H6, EXO70H6	exocyst subunit exo70 family protein H6	2.35574	2.3221	2.44067	2.29847	2.30521	2.39744	2.37284	2.33371	N.S.	1.016	0.024	0.93619	0.362726	0.171736	0.482121	0.260776	0.276761	0	0.338861	0.179179	N.A.	N.A.	N.A.	N.A.	Non-Target	NO	NO	NO	NO	NO	NO	NO	2472	2472	0.447	0.447	0.447
AT1G07730	Q9LQQ0	AT1G07730		Disease resistance-responsive (dirigent-like protein) family protein	2.12052	1.56601	1.71242	2.38693	1.98226	2.39881	1.79965	2.256	UP	1.6	0.678	0.03437	3.40906	3.39824	3.4661	3.59738	3.61542	3.82552	3.42447	3.67944	N.S.	0.996	-0.006	0.96881	Non-Target	NO	NO	NO	NO	NO	NO	NO	1170	1170	0.522	0.522	0.522
AT1G07740	Q9LQQ1	AT1G07740		Tetratricopeptide repeat (TPR)-like superfamily protein	0.542532	0.567741	0.741172	0.586257	0.400767	0.684226	0.617149	0.557083	N.S.	0.962	-0.056	0.88074	1.72543	1.77144	1.92385	2.11952	2.048	2.09676	1.8069	2.0881	N.S.	1.126	0.171	0.17833	Non-Target	NO	NO	NO	NO	NO	NO	NO	2658	2658	0.474	0.474	0.474
AT1G07745	A0A1P8AT83, A3QS63, A3QS64, A3QS65, A8MSF8, Q9LQQ2	RAD51D	ATRAD51D, RAD51D, SSN1	DNA repair RAD51-like protein	1.09349	1.00355	0.846489	0.641749	0.782176	0.650162	0.981176	0.691362	N.S.	0.789	-0.343	0.32624	0.806469	0.882384	0.735466	0.773771	0.986641	0.496981	0.808106	0.752464	N.S.	0.958	-0.062	0.71591	Non-Target	NO	NO	NO	NO	NO	3UTR	NO	1243, 1257, 1326, 1546, 1642	1642	0.431, 0.416, 0.419, 0.428, 0.434	0.434	0.426
AT1G07747	A8MRP3	AT1G07747		Bifunctional inhibitor/lipid-transfer protein/seed storage 2S albumin superfamily protein	0.510011	0.941803	0.717866	0.387088	0.50793	0	0.723227	0.298339	N.S.	0.945	-0.082	0.60549	N.E.	N.E.	N.E.	N.E.	N.E.	N.E.	N.E.	N.E.	N.E.	N.E.	N.E.	N.E.	N.A.	NO	NO	NO	NO	NO	NO	NO	288	288	0.406	0.406	0.406
AT1G07750	Q9LQQ3	AT1G07750		RmlC-like cupins superfamily protein	5.4294	5.46361	5.54092	5.33734	5.27266	5.27097	5.47798	5.29366	N.S.	0.893	-0.163	0.40691	4.87535	4.82721	4.90419	5.17456	5.16295	5.20736	4.86892	5.18162	N.S.	1.016	0.023	0.83216	PERMISSIVE	NO	YES	YES	NO	NO	NO	NO	1565	1565	0.443	0.443	0.443
AT1G07770	P42798	RPS15A	RPS15A	ribosomal protein S15A	6.09702	5.84256	5.81189	5.46586	5.16517	5.15109	5.91716	5.26071	DOWN	0.574	-0.801	1.9e-05	6.16878	6.17162	5.99459	5.7559	5.68407	5.64539	6.11166	5.69512	DOWN	0.66	-0.6	1.1e-12	STRINGENT	3UTR,3UTR,3UTR	YES	YES	NO	3UTR	3UTR	Stop codon	725, 801, 1653	1653	0.385, 0.412, 0.411	0.412	0.403
AT1G07780	A0A1P8ATT5, A0A1P8ATU6, B3H4J9, Q42440	PAI1	PAI1, TRP6	phosphoribosylanthranilate isomerase 1	0.613775	0.300683	0.927504	0.542828	0.91714	0.455697	0.613988	0.638555	N.S.	1.022	0.031	0.93366	2.72391	2.67847	2.6239	3.04098	2.92871	2.78832	2.67542	2.91934	1/1.5<=FC<=1.5	1.295	0.372	1e-08	Non-Target	NO	NO	NO	5UTR	NO	3UTR	NO	1271, 1381, 1535, 1537, 1567, 1573, 1599, 1652, 1690, 1852, 1916, 1941, 2007	2007	0.41, 0.412, 0.396, 0.391, 0.409, 0.399, 0.392, 0.42, 0.382, 0.381, 0.395, 0.401	0.42	0.4
AT1G07790	A0A178WBK5, Q9LQQ4	HTB1	HTB1	Histone superfamily protein	3.71937	3.14598	3.11206	3.34228	3.54776	3.37463	3.32581	3.42155	N.S.	1.11	0.151	0.60225	5.98799	6.01426	5.93516	5.95551	5.86018	5.82323	5.97913	5.87964	N.S.	0.872	-0.198	0.17208	Non-Target	NO	NO	NO	NO	NO	NO	NO	853	853	0.409	0.409	0.409
AT1G07795	Q29PW8, Q8LCP4	AT1G07795		forkhead box protein G1	1.4207	1.8024	1.84867	1.65727	1.35812	2.18429	1.69059	1.73323	N.S.	1.083	0.115	0.74697	2.65672	2.51344	2.4508	2.38305	1.86315	1.92918	2.54032	2.05846	DOWN	0.665	-0.589	0.00181	Non-Target	NO	NO	NO	NO	NO	NO	NO	825	825	0.436	0.436	0.436
AT1G07810	P92939	ECA1	ACA3, ATECA1, ECA1	ER-type Ca2 -ATPase 1	3.37238	3.01592	2.89649	2.68473	2.76514	2.7164	3.09493	2.72209	1/1.5<=FC<=1.5	0.737	-0.439	0.03726	3.17023	3.055	3.33108	3.34296	3.56371	3.75104	3.18544	3.55257	1/1.5<=FC<=1.5	1.18	0.239	0.00392	PERMISSIVE	NO	YES	YES	3UTR	NO	3UTR	NO	3658	3658	0.452	0.452	0.452
AT1G07820	P59259	AT1G07820		Histone superfamily protein	4.85369	4.16129	4.18715	4.76015	4.82062	4.51199	4.40071	4.69758	N.S.	1.314	0.393	0.13963	5.72229	5.81183	5.81069	5.73275	5.64013	5.52403	5.7816	5.6323	1/1.5<=FC<=1.5	0.862	-0.215	0.01363	Non-Target	NO	NO	NO	NO	NO	NO	CDS	859, 978	978	0.405, 0.413	0.413	0.409
AT1G07830	Q94JQ7	AT1G07830		ribosomal protein L29 family protein	2.71849	2.49165	2.34389	2.00414	2.3001	2.35722	2.51801	2.22049	N.S.	0.817	-0.291	0.30316	4.38411	4.35571	4.20968	3.96771	4.00304	3.97061	4.3165	3.98045	1/1.5<=FC<=1.5	0.708	-0.499	1.6e-10	PERMISSIVE	NO	YES	YES	3UTR	3UTR	NO	3' UTR	1113	1113	0.441	0.441	0.441
AT1G07840	Q93ZQ9, Q9LQQ6	AT1G07840		Sas10/Utp3/C1D family	2.18698	1.96887	2.04127	2.13488	2.09215	2.04293	2.06571	2.08999	N.S.	1.072	0.1	0.72961	3.45989	3.35178	3.43027	3.36025	3.39173	3.44628	3.41398	3.39942	N.S.	0.964	-0.053	0.4937	PERMISSIVE	NO	YES	YES	NO	NO	NO	NO	1383, 1410, 1433	1433	0.409, 0.413, 0.416	0.416	0.413
AT1G07850	F4HSH8	AT1G07850		transferring glycosyl group transferase (DUF604)	0.105893	0.290209	0.23395	0.14797	0.114007	0.27117	0.210017	0.177716	N.A.	N.A.	N.A.	N.A.	N.E.	N.E.	N.E.	N.E.	N.E.	N.E.	N.E.	N.E.	N.E.	N.E.	N.E.	N.E.	N.A.	NO	NO	NO	NO	NO	NO	NO	2172	2172	0.479	0.479	0.479
AT1G07860	Q8RY98	AT1G07860		Serine/Threonine-kinase RLCKVII protein	0	0	0.910831	0	0	0	0.30361	0	N.S.	0.963	-0.054	0.53497	0	0.298434	0.27775	0	0	0	0.192061	0	N.A.	N.A.	N.A.	N.A.	N.A.	NO	NO	NO	NO	NO	NO	NO	439	439	0.472	0.472	0.472
AT1G07870	F4HSH9, Q9LQQ8	AT1G07870		Protein kinase superfamily protein	2.92369	2.91138	3.07862	3.15525	3.26903	3.24833	2.97123	3.2242	1/1.5<=FC<=1.5	1.335	0.417	0.04986	2.42798	2.19907	2.25026	2.44576	2.24924	2.18471	2.29244	2.29324	N.S.	0.946	-0.08	0.51045	Non-Target	NO	NO	NO	NO	NO	NO	NO	1816, 2000	2000	0.427, 0.4	0.427	0.414
AT1G07880	A0A178WHV9, Q9LQQ9, Q9LQQ9-2	ATMPK13	ATMPK13	Protein kinase superfamily protein	0.106613	0	0	0	0	0.140963	0.0355378	0.0469877	N.A.	N.A.	N.A.	N.A.	0.434124	0.620352	0.506794	0.630221	0.66946	0.300665	0.520423	0.533449	N.S.	0.901	-0.151	0.38815	Non-Target	NO	NO	NO	NO	NO	NO	NO	1535, 1640	1640	0.396, 0.4	0.4	0.398
AT1G07885	F4HSI4	AT1G07885		hypothetical protein	0	0	0	0	0.377138	0.38146	0	0.252866	N.A.	N.A.	N.A.	N.A.	1.18062	0.768798	0.236522	1.33543	0.270707	1.00357	0.728645	0.869904	N.S.	0.968	-0.047	0.76045	Non-Target	NO	NO	NO	NO	NO	NO	NO	366, 502	502	0.391, 0.384	0.391	0.388
AT1G07890	C0Z2H6, F4HU93, Q05431	APX1	APX1, ATAPX01, ATAPX1, CS1, MEE6	ascorbate peroxidase 1	7.29686	7.13116	7.15678	7.1434	7.29586	7.33286	7.19493	7.25737	N.S.	1.126	0.171	0.36494	7.68812	7.78317	7.57023	7.70726	7.64368	7.72565	7.68051	7.6922	N.S.	0.921	-0.119	0.38324	STRINGENT	3UTR,3UTR,3UTR,3UTR,3UTR,3UTR,3UTR,3UTR	YES	YES	NO	3UTR	3UTR, 5UTR	3' UTR	1022, 1137, 1229, 1267, 1270, 1297, 1304, 1385	1385	0.465, 0.457, 0.469, 0.456, 0.478, 0.471, 0.47, 0.48	0.48	0.468
AT1G07900	Q9LQR0	LBD1	LBD1	LOB domain-containing protein 1	0	0	0	0.116896	0	0	0	0.0389655	N.A.	N.A.	N.A.	N.A.	0	0.0910438	0	0.304907	0.100006	0	0.0303479	0.134971	N.A.	N.A.	N.A.	N.A.	Non-Target	NO	NO	NO	NO	NO	NO	NO	742	742	0.43	0.43	0.43
AT1G07901	B3H516	AT1G07901		hypothetical protein	1.50904	1.65022	2.08722	1.37676	1.5115	1.51379	1.74883	1.46735	N.S.	0.954	-0.068	0.77232	N.E.	N.E.	N.E.	N.E.	N.E.	N.E.	N.E.	N.E.	N.E.	N.E.	N.E.	N.E.	Non-Target	NO	NO	NO	NO	NO	NO	NO	153	153	0.431	0.431	0.431
AT1G07902	A0A1P8APT0	AT1G07902		hypothetical protein	1.58607	1.15956	1.36555	0.903372	0.933535	1.25524	1.37039	1.03071	N.S.	0.872	-0.198	0.53626	2.56433	2.43371	2.72201	2.37135	2.19722	2.16884	2.57335	2.2458	1/1.5<=FC<=1.5	0.765	-0.387	8.6e-06	Non-Target	NO	NO	NO	NO	NO	NO	NO	479	479	0.424	0.424	0.424
AT1G07910	A0A2H1ZEA2, Q0WL81, Q0WL81-2	RNL	AtRLG1, ATRNL, RNL, ZYG3	RNAligase	1.26055	0.889893	1.03734	1.02636	0.741058	0.907725	1.06259	0.891713	N.S.	0.862	-0.214	0.49222	1.41869	1.10184	1.53599	1.5151	1.59526	1.66792	1.35217	1.59276	1/1.5<=FC<=1.5	1.148	0.2	0.01702	PERMISSIVE	NO	YES	NO	NO	NO	NO	NO	3820, 3942	3942	0.424, 0.427	0.427	0.426
AT1G07920	P0DH99	AT1G07920		GTP binding Elongation factor Tu family protein	5.93282	5.7355	5.6216	5.53889	5.46075	5.39813	5.76331	5.46592	N.S.	0.805	-0.314	0.06521	6.5504	6.62423	6.61318	6.82724	7.00736	7.18326	6.59594	7.00595	N.S.	1.164	0.219	0.05542	STRINGENT	3UTR	YES	YES	NO	3UTR	3UTR, CDS	3' UTR	1858	1858	0.467	0.467	0.467
AT1G07930	F4HUA0, P0DH99, Q56Z84	AT1G07930		GTP binding Elongation factor Tu family protein	5.46051	5.19053	5.10526	4.74055	4.73895	4.69679	5.2521	4.72543	DOWN	0.642	-0.639	9.4e-05	6.30088	6.39337	6.41405	6.38176	6.64225	6.8932	6.36944	6.63907	N.S.	1.063	0.088	0.50608	STRINGENT	3UTR,3UTR	YES	YES	NO	3UTR	3UTR, CDS	Stop codon	1576, 1894	1894	0.461	0.461	0.461
AT1G07940	P0DH99	AT1G07940		GTP binding Elongation factor Tu family protein	6.08641	5.98544	5.86633	5.50685	5.43719	5.43123	5.97939	5.45842	DOWN	0.643	-0.636	1.4e-05	6.45883	6.50391	6.50515	6.65379	6.845	7.0368	6.48929	6.8452	N.S.	1.106	0.146	0.22188	STRINGENT	3UTR,3UTR,3UTR,3UTR	YES	YES	NO	3UTR	3UTR, CDS	3' UTR	1905, 2027, 2089, 2355	2355	0.437, 0.449, 0.454, 0.458	0.458	0.45
AT1G07950	A0A1P8ATZ6, Q8LCH5	MED22B	MED22B	Surfeit locus protein 5 subunit 22 of Mediator complex	3.48585	3.02567	3.05959	3.29675	3.51231	3.34778	3.19037	3.38561	N.S.	1.232	0.3	0.23265	4.38613	4.271	4.07954	4.18523	4.00184	3.83986	4.24556	4.00898	1/1.5<=FC<=1.5	0.848	-0.238	0.00596	Non-Target	NO	NO	NO	NO	NO	NO	NO	873, 980	980	0.424, 0.412	0.424	0.418
AT1G07960	Q8GYD1	PDIL5-1	ATPDIL5-1, PDIL5-1	PDI-like 5-1	4.45273	4.31108	4.07943	3.79339	3.83458	3.84792	4.28108	3.8253	1/1.5<=FC<=1.5	0.69	-0.536	0.00592	4.60006	4.39898	4.34592	4.20779	4.03068	3.77359	4.44832	4.00402	1/1.5<=FC<=1.5	0.725	-0.463	2.8e-08	PERMISSIVE	NO	YES	YES	3UTR	3UTR	NO	Stop codon	849, 944, 1037, 1298	1298	0.382, 0.393, 0.388, 0.372	0.393	0.384
AT1G07970	Q9LN10	AT1G07970		cytochrome B561, amino-terminal protein	1.47558	0.959625	0.938281	1.00082	0.95238	1.00931	1.12449	0.987504	N.S.	0.889	-0.17	0.60815	1.90839	1.9316	2.15007	1.89278	2.04926	2.04416	1.99669	1.9954	1/1.5<=FC<=1.5	0.862	-0.215	4.3e-06	Non-Target	NO	NO	NO	3UTR	NO	NO	NO	2680	2680	0.44	0.44	0.44
AT1G07980	A0A1P8AN83, Q9LN09	NF-YC10	NF-YC10	nuclear factor Y, subunit C10	3.17096	3.11537	3.16151	2.94005	3.22501	3.1674	3.14928	3.11082	N.S.	1.026	0.037	0.90008	3.02365	2.77366	2.9594	2.80113	2.8084	2.57374	2.9189	2.72776	1/1.5<=FC<=1.5	0.867	-0.206	9.7e-05	PERMISSIVE	NO	YES	YES	NO	NO	NO	NO	1197, 1319	1319	0.406, 0.401	0.406	0.404
AT1G07985	Q3EDG6, Q9LN08	AT1G07985		Expressed protein	3.8151	4.01988	3.89072	3.97541	4.44661	4.0784	3.90857	4.16681	N.S.	1.33	0.411	0.10936	3.37867	3.29253	3.34487	3.40964	3.23794	2.90625	3.33869	3.18461	1/1.5<=FC<=1.5	0.714	-0.486	0.00616	Non-Target	NO	NO	NO	NO	NO	NO	NO	942	942	0.404	0.404	0.404
AT1G07990	A0A1P8ATA9, Q8L7T5	AT1G07990		SIT4 phosphatase-associated family protein	2.56935	2.45663	2.58907	2.75618	2.78424	2.65079	2.53835	2.7304	N.S.	1.275	0.351	0.07201	2.37073	2.35073	2.58999	2.69507	2.90163	2.91187	2.43715	2.83619	1/1.5<=FC<=1.5	1.204	0.268	2.6e-06	Non-Target	NO	NO	NO	3UTR	NO	3UTR	Stop codon	3167, 3313	3313	0.414, 0.418	0.418	0.416
AT1G08000	Q8VZP4	GATA10	GATA10	GATA transcription factor 10	1.25363	1.42667	1.11035	1.36251	1.61584	1.17073	1.26355	1.38303	N.S.	1.173	0.23	0.48326	2.08961	2.13509	2.19693	2.42428	2.43443	2.59194	2.14054	2.48355	N.S.	1.141	0.191	0.05814	Non-Target	NO	NO	NO	NO	NO	NO	NO	1493, 1990	1990	0.44, 0.435	0.44	0.438
AT1G08010	Q6DBP8	GATA11	GATA11	GATA transcription factor 11	4.0084	3.77119	3.62904	3.7888	3.61894	3.69918	3.80288	3.70231	N.S.	0.964	-0.054	0.82895	2.84976	2.99038	2.981	3.12981	3.18335	3.16584	2.94038	3.15967	N.S.	1.054	0.076	0.57693	Non-Target	NO	NO	NO	3UTR	NO	NO	NO	1254, 1312, 1507	1507	0.439, 0.446, 0.458	0.458	0.448
AT1G08030	A0A178WAS0, Q3EDG5, Q3EDG5-2	TPST	AQC1, HPS7, TPST	tyrosylprotein sulfotransferase	2.5252	2.14537	2.08815	2.39555	2.44368	2.40755	2.25291	2.4156	N.S.	1.208	0.273	0.27152	2.42795	2.50678	2.51987	2.75635	2.57199	2.63723	2.48487	2.65519	N.S.	1.01	0.015	0.78659	Non-Target	NO	NO	NO	NO	3UTR	3UTR	NO	1804, 2013	2013	0.413, 0.414	0.414	0.414
AT1G08035	A0A1P8AMD3, Q9LN05	AT1G08035		hypothetical protein	0.198098	0.229499	0	0	0	0.574878	0.142532	0.191626	N.A.	N.A.	N.A.	N.A.	0.262118	0.28703	0.20557	0.333352	0.269451	0.416879	0.251573	0.339894	N.S.	1.176	0.234	0.18346	Non-Target	NO	NO	NO	NO	NO	NO	NO	620, 686, 714	714	0.364, 0.36, 0.363	0.364	0.362
AT1G08040	A0A1P8AV11, Q93ZR2	AT1G08040		trimethylguanosine synthase (DUF707)	2.83003	2.55557	2.69444	2.61406	2.28752	2.52834	2.69334	2.47664	N.S.	0.874	-0.195	0.44271	2.39554	2.52108	2.49883	2.45397	2.51887	2.54482	2.47182	2.50589	1/1.5<=FC<=1.5	0.873	-0.195	0.00354	PERMISSIVE	NO	YES	YES	3UTR	NO	3UTR	Stop codon	1501, 1631, 1643, 1653	1653	0.403, 0.4, 0.408	0.408	0.404
AT1G08050	Q9LN03	AT1G08050		Zinc finger (C3HC4-type RING finger) family protein	3.32245	3.468	3.67663	3.72376	4.14022	3.58741	3.48903	3.81713	N.S.	1.404	0.489	0.07321	1.94481	2.10201	2.18053	1.92997	2.22503	2.40474	2.07578	2.18658	N.S.	0.992	-0.011	0.93724	Non-Target	NO	NO	NO	NO	NO	NO	NO	2490	2490	0.453	0.453	0.453
AT1G08060	A0A1P8ASM1, Q9M658	MOM	MOM, MOM1	ATP-dependent helicase family protein	1.28909	1.25228	1.2766	1.24325	1.29873	1.20935	1.27266	1.25044	N.S.	1.03	0.042	0.88045	0.554461	0.564706	0.760235	0.90918	1.12505	1.22044	0.626467	1.08489	UP	1.619	0.695	4.5e-16	Non-Target	NO	NO	NO	NO	NO	NO	NO	6286, 6557, 6592	6592	0.429, 0.43	0.43	0.429
AT1G08070	A0A1P8ARF0, Q9LN01	OTP82	EMB3102, OTP82	Tetratricopeptide repeat (TPR)-like superfamily protein	0.145766	0.0536109	0.164835	0.259469	0.0881345	0.203943	0.121404	0.183849	N.A.	N.A.	N.A.	N.A.	0.210313	0.156224	0.277332	0.322493	0.331931	0.285545	0.214623	0.313323	N.A.	N.A.	N.A.	N.A.	Non-Target	NO	NO	NO	NO	NO	NO	NO	2391, 2471	2471	0.404, 0.405	0.405	0.404
AT1G08090	O82811	NRT2:1	ACH1, ATNRT2.1, ATNRT2:1, LIN1, NRT2, NRT2.1, NRT2:1, NRT2;1AT	nitrate transporter 2:1	0	0	0	0	0	0.101702	0	0.0339005	N.A.	N.A.	N.A.	N.A.	1.40256	2.07772	2.2466	2.95793	3.47536	3.86938	1.90896	3.43422	UP	4.816	2.268	2.4e-05	Non-Target	NO	NO	NO	NO	NO	NO	NO	2111	2111	0.468	0.468	0.468
AT1G08110	B9DH52, Q8H0V3	AT1G08110	AtGLYI2, GLXI:3	lactoylglutathione lyase family protein / glyoxalase I family protein	4.14378	3.95081	3.95013	3.33167	3.41259	3.24003	4.01491	3.3281	DOWN	0.544	-0.879	1.5e-06	4.67881	4.57489	4.55987	4.11353	4.07234	3.94891	4.60452	4.04492	DOWN	0.612	-0.709	< 2e-16	STRINGENT	3UTR,3UTR,3UTR,3UTR	YES	YES	NO	3UTR	3UTR	3' UTR	1021, 1036, 1110, 1198	1198	0.439, 0.436, 0.425, 0.426	0.439	0.432
AT1G08120	Q5Q0I2	AT1G08120		TP53-regulating kinase-like protein	0.207668	0	0	0	0	0	0.0692228	0	N.A.	N.A.	N.A.	N.A.	0.212546	0.0363821	0.156091	0.0457933	0.0794459	0	0.135006	0.0417464	N.A.	N.A.	N.A.	N.A.	N.A.	NO	NO	NO	NO	NO	NO	NO	1047	1047	0.424	0.424	0.424
AT1G08125	A0A1P8AME4, F4HUD4, F4HUD5, F4HUD6, Q84TK2	AT1G08125		S-adenosyl-L-methionine-dependent methyltransferases superfamily protein	2.20747	2.12032	2.08388	2.03377	1.94577	1.88839	2.13723	1.95598	N.S.	0.899	-0.153	0.59293	2.95237	2.89073	2.93742	3.10334	2.93644	2.99083	2.92684	3.0102	N.S.	0.992	-0.012	0.87488	PERMISSIVE	NO	YES	NO	3UTR	NO	NO	NO	1067, 1116, 1214, 1305	1305	0.42, 0.426, 0.438, 0.427	0.438	0.428
AT1G08130	A0A178W5M1, Q42572, Q42572-2, Q42572-3	LIG1	ATLIG1, LIG1	DNA ligase 1	2.11087	1.9759	2.00775	1.98652	1.95557	2.01419	2.0315	1.98543	N.S.	1.009	0.013	0.96426	2.44203	2.4559	2.70916	2.59662	2.84636	3.0578	2.53569	2.83359	1/1.5<=FC<=1.5	1.279	0.356	3.3e-06	PERMISSIVE	NO	YES	YES	NO	NO	NO	Stop codon	2754	2754	0.425	0.425	0.425
AT1G08140	Q8GX92	CHX6A	ATCHX6A, CHX6A	cation/H exchanger 6A	0.0188669	0	0	0	0	0	0.00628897	0	N.A.	N.A.	N.A.	N.A.	0	0	0	0.0138418	0	0	0	0.00461392	N.A.	N.A.	N.A.	N.A.	N.A.	NO	NO	NO	NO	NO	NO	NO	2883	2883	0.415	0.415	0.415
AT1G08150	Q3EDG3	ATCHX5	ATCHX5, CHX5	Cation/hydrogen exchanger family protein	0.0197899	0	0	0	0	0	0.00659663	0	N.A.	N.A.	N.A.	N.A.	0	0	0	0	0.0128353	0	0	0.00427842	N.A.	N.A.	N.A.	N.A.	N.A.	NO	NO	NO	NO	NO	NO	NO	2754	2754	0.438	0.438	0.438
AT1G08160	Q8VZ13	AT1G08160		Late embryogenesis abundant (LEA) hydroxyproline-rich glycoprotein family	1.53303	1.13537	1.3019	2.58483	1.93293	2.09077	1.32343	2.20285	UP	2.851	1.511	0.00012	3.98652	4.0189	3.98213	4.18153	4.2406	4.39315	3.99585	4.27176	N.S.	1.027	0.039	0.7444	Non-Target	NO	NO	NO	NO	NO	NO	NO	1020	1020	0.429	0.429	0.429
AT1G08165	F4HUE2	AT1G08165		hypothetical protein	0	0	0	0.210764	0	0.287549	0	0.166104	N.A.	N.A.	N.A.	N.A.	N.E.	N.E.	N.E.	N.E.	N.E.	N.E.	N.E.	N.E.	N.E.	N.E.	N.E.	N.E.	Non-Target	NO	NO	NO	NO	NO	NO	NO	776	776	0.358	0.358	0.358
AT1G08180	Q9SGE2	AT1G08180	SMR2	cyclin-dependent kinase inhibitor	1.00435	0.64653	1.09434	1.45315	1.06746	1.16278	0.915073	1.2278	N.S.	1.305	0.384	0.2831	1.62259	1.78927	1.53265	1.74213	1.69315	1.42704	1.64817	1.62077	1/1.5<=FC<=1.5	0.759	-0.398	0.00327	Non-Target	NO	NO	NO	NO	NO	NO	NO	958	958	0.354	0.354	0.354
AT1G08190	P93043	VPS41	ATVAM2, ATVPS41, VAM2, VPS41, ZIP2	vacuolar protein sorting 41	4.15621	4.1563	4.26271	4.09095	4.08714	4.04166	4.19174	4.07325	N.S.	0.947	-0.078	0.71548	3.56246	3.64086	3.8494	3.85728	3.9677	3.90976	3.68424	3.91158	1/1.5<=FC<=1.5	1.067	0.094	0.02244	PERMISSIVE	NO	YES	YES	NO	3UTR	3UTR	Stop codon, 3' UTR	3481	3481	0.438	0.438	0.438
AT1G08200	Q9SGE0	AXS2	AXS2	UDP-D-apiose/UDP-D-xylose synthase 2	6.14719	6.21174	6.00295	6.03081	6.04128	6.06704	6.12063	6.04638	N.S.	0.987	-0.019	0.93619	5.63855	5.6206	5.66099	5.66014	5.63487	5.68982	5.64005	5.66161	1/1.5<=FC<=1.5	0.893	-0.163	0.04617	STRINGENT	3UTR	YES	YES	NO	3UTR	3UTR, 5UTR	Stop codon	1846	1846	0.417	0.417	0.417
AT1G08210	A0A178WLQ2, A0A178WLQ9, A0A1P8AM85, A0A1P8AM88, A0A1P8AM93, Q9FPD6	AT1G08210		Eukaryotic aspartyl protease family protein	2.28065	2.45029	2.67137	2.83957	3.00121	2.95145	2.46744	2.93074	UP	1.612	0.689	0.00776	2.16939	2.10653	2.31474	2.41765	2.30092	2.31072	2.19689	2.3431	1/1.5<=FC<=1.5	0.836	-0.259	0.01993	PERMISSIVE	NO	YES	YES	NO	NO	NO	NO	1713, 1716, 1751, 1756	1756	0.437, 0.435, 0.434, 0.43	0.437	0.434
AT1G08220	Q0WRX7, Q5XEN3	AT1G08220		ATPase complex subunit	2.06735	1.58081	1.65443	1.62886	1.68217	1.84698	1.76753	1.71934	N.S.	0.987	-0.019	0.95687	3.06406	3.05116	3.08908	2.70155	2.78314	3.05589	3.0681	2.84686	1/1.5<=FC<=1.5	0.827	-0.274	0.01227	PERMISSIVE	NO	YES	YES	NO	NO	NO	NO	1134, 1232	1232	0.419, 0.412	0.419	0.416
AT1G08230	A0A1P8ANX9, A0A1P8ANY8, F4HW02	AT1G08230		Transmembrane amino acid transporter family protein	1.63874	1.80928	1.75124	2.99969	3.035	2.76851	1.73309	2.9344	UP	3.984	1.994	< 2e-16	2.2394	2.22437	2.23957	2.75534	2.71895	2.6039	2.23445	2.69273	N.S.	1.125	0.169	0.14115	Non-Target	NO	NO	NO	NO	NO	NO	NO	1674, 1696, 1786, 2900, 2993	2993	0.409, 0.367, 0.406, 0.364, 0.412	0.412	0.392
AT1G08250	Q9SGD6	ADT6	ADT6, AtADT6	arogenate dehydratase 6	0.873333	0.353353	0.159524	1.35817	1.09497	1.46531	0.46207	1.30615	UP	3.437	1.781	0.00157	2.83598	2.73589	2.73547	3.04457	3.07955	3.07685	2.76911	3.06699	N.S.	1.023	0.033	0.7862	Non-Target	NO	NO	NO	NO	NO	NO	NO	1834	1834	0.468	0.468	0.468
AT1G08260	A0A178WHY2, A0A384L5K4, F4HW04	TIL1	ABO4, EMB142, EMB2284, EMB529, ESD7, POL2A, TIL1	DNA polymerase epsilon catalytic subunit	0.864863	0.602223	0.826003	0.543232	0.66726	0.431818	0.764363	0.547437	N.S.	0.744	-0.426	0.16073	0.72519	0.505027	0.890916	0.844071	1.30041	1.3579	0.707045	1.16746	UP	1.663	0.734	4.2e-12	PERMISSIVE	NO	YES	NO	NO	NO	NO	Stop codon	8435, 8576	8576	0.424, 0.426	0.426	0.425
AT1G08270	F4HW05, Q9SGD4	AT1G08270		vacuolar protein sorting-associated protein	0.662216	0.129814	1.27988	0.4424	1.11651	0.586179	0.690637	0.715031	N.S.	0.986	-0.02	0.94179	0.600708	0.705298	0.696285	0.628674	0.961665	0.530093	0.66743	0.706811	N.S.	1.048	0.068	0.62065	Non-Target	NO	NO	NO	NO	NO	NO	Stop codon	412, 1034	1034	0.411, 0.434	0.434	0.422
AT1G08280	Q9SGD2	AT1G08280	GALT29A	Glycosyltransferase family 29 (sialyltransferase) family protein	1.38496	0.668424	0.787314	1.10177	1.104	1.06084	0.946899	1.08887	N.S.	1.116	0.159	0.65109	2.27903	2.30045	2.27495	2.36444	2.51763	2.52754	2.28481	2.46987	N.S.	1.064	0.09	0.42514	Non-Target	NO	NO	NO	NO	NO	NO	NO	2095	2095	0.404	0.404	0.404
AT1G08290	Q9SGD1	WIP3	WIP3	WIP domain protein 3	0.0293568	0	0.0880548	0.0413828	0.0574384	0.11356	0.0391372	0.0707937	N.A.	N.A.	N.A.	N.A.	0.275933	0.458689	0.403964	0.444848	0.548594	0.10605	0.379529	0.366497	N.S.	1.034	0.049	0.76791	Non-Target	NO	NO	NO	NO	NO	NO	NO	1895	1895	0.392	0.392	0.392
AT1G08300	A0A178WKH0, A0A1P8ARF3, A0A1P8ARG1, F4HW09	NVL	NVL	no vein-like protein	0.490282	0.557586	0.53268	0.621299	1.05025	0.724247	0.526849	0.798598	N.S.	1.494	0.579	0.13069	0.688134	0.750107	0.870206	0.906728	0.931084	0.741135	0.769483	0.859649	1/1.5<=FC<=1.5	1.236	0.305	0.01695	Non-Target	NO	NO	NO	NO	NO	NO	NO	2091, 2205, 2241	2241	0.415, 0.413, 0.414	0.415	0.414
AT1G08310	A0A1P8AWS9, A8MRK8, B3H6Y0	AT1G08310		alpha/beta-Hydrolases superfamily protein	1.70785	0.475063	0.555583	0.251157	0.850448	0.756795	0.912833	0.619467	N.S.	0.826	-0.275	0.36436	1.25152	0.928337	1.01518	1.23608	0.911368	0.932329	1.06501	1.02659	N.S.	1.035	0.05	0.70936	Non-Target	NO	NO	NO	NO	NO	NO	NO	1159, 1474, 1483	1483	0.407, 0.394, 0.396	0.407	0.399
AT1G08315	Q0WNZ8	AT1G08315		ARM repeat superfamily protein	2.7569	2.84496	3.01334	2.53756	2.84388	2.92498	2.87174	2.76881	N.S.	0.97	-0.045	0.88984	2.78523	2.74347	2.99232	2.9976	2.871	3.0482	2.84034	2.97227	N.S.	1.041	0.058	0.52135	Non-Target	NO	NO	NO	NO	NO	NO	NO	1211	1211	0.473	0.473	0.473
AT1G08320	A0A178WGY8, A0A178WIM8, A0A178WKE7, Q93XM6, Q93XM6-2, Q9SJF7	TGA9	bZIP21, TGA9	bZIP transcription factor family protein	2.7013	2.42163	2.83854	2.54798	2.81317	2.74639	2.65382	2.70252	N.S.	1.087	0.12	0.6699	2.87344	2.98567	3.15281	3.16233	3.06825	3.24805	3.00397	3.15954	N.S.	0.975	-0.036	0.64562	Non-Target	NO	NO	NO	NO	NO	NO	NO	1770, 1925, 1934, 2157, 2282	2282	0.413, 0.422, 0.434, 0.419, 0.432	0.434	0.424
AT1G08340	Q6NKT5	AT1G08340		Rho GTPase activating protein with PAK-box/P21-Rho-binding domain-containing protein	3.17117	3.50656	3.72566	3.32006	3.00281	3.461	3.46779	3.26129	N.S.	0.882	-0.181	0.54936	3.01833	3.00748	3.20579	2.92015	2.89002	2.89189	3.0772	2.90069	1/1.5<=FC<=1.5	0.744	-0.426	7.4e-08	Non-Target	NO	NO	NO	NO	NO	NO	NO	1615	1615	0.448	0.448	0.448
AT1G08350	A0A1P8AW75, F4HW17, F4HW17-2	AT1G08350		Endomembrane protein 70 protein family	3.03445	2.7532	2.67351	2.13829	2.20051	2.26433	2.82039	2.20104	DOWN	0.563	-0.828	0.00013	2.56267	2.55413	2.57598	2.79188	2.7925	3.01032	2.56426	2.8649	N.S.	1.035	0.05	0.53811	PERMISSIVE	NO	YES	YES	NO	NO	NO	NO	1872, 2007, 2013, 2213	2213	0.4, 0.408, 0.412, 0.41	0.412	0.408
AT1G08360	Q8VZB9	AT1G08360		Ribosomal protein L1p/L10e family	5.74536	5.27105	5.13944	4.08258	4.04927	4.19839	5.38528	4.11008	DOWN	0.298	-1.745	4e-15	6.60345	6.65741	6.51271	6.23804	6.25214	6.19176	6.59119	6.22731	1/1.5<=FC<=1.5	0.668	-0.582	4.8e-06	STRINGENT	3UTR	YES	YES	NO	3UTR	3UTR	Stop codon	1110	1110	0.405	0.405	0.405
AT1G08370	Q9SJF3	DCP1	ATDCP1, DCP1	decapping 1	3.91169	3.83909	3.80657	3.68342	3.66562	3.65825	3.85245	3.6691	N.S.	0.894	-0.162	0.38219	3.2422	3.20211	3.36116	3.54018	3.60675	3.70239	3.26849	3.61644	1/1.5<=FC<=1.5	1.123	0.167	0.03505	PERMISSIVE	NO	YES	NO	NO	3UTR	3UTR	NO	1718	1718	0.417	0.417	0.417
AT1G08380	Q949Q5	PSAO	PSAO	photosystem I subunit O	1.61299	1.41143	1.41575	1.99732	2.142	1.95767	1.48006	2.03233	UP	1.825	0.868	0.01336	3.53919	4.0694	4.13909	4.47796	4.98499	4.54526	3.91589	4.6694	1/1.5<=FC<=1.5	1.326	0.407	0.00094	N.A.	CDS,3UTR	NO	NO	NO	3UTR	5UTR, 3UTR, CDS	NO	819	819	0.413	0.413	0.413
AT1G08390	A0A1P8AN39, Q8RX36	AT1G08390	RMI2	recQ-mediated instability-like protein	1.82002	1.56471	1.66856	0.920728	1.14402	0.88129	1.68443	0.982012	DOWN	0.508	-0.976	0.02861	2.77777	2.61228	2.55718	2.54932	2.35682	2.51657	2.64908	2.47424	1/1.5<=FC<=1.5	0.723	-0.467	7.1e-08	PERMISSIVE	NO	YES	YES	3UTR	NO	NO	NO	546, 744	744	0.445, 0.451	0.451	0.448
AT1G08400	Q8GXP1	AT1G08400		RINT-1 / TIP-1 family	0.741211	0.650365	0.797145	0.774174	0.87313	0.820838	0.729574	0.822714	N.S.	1.155	0.208	0.53109	1.39286	1.43157	1.45095	1.79153	1.72445	1.88036	1.42513	1.79878	1/1.5<=FC<=1.5	1.294	0.371	3.5e-09	Non-Target	NO	NO	NO	NO	NO	NO	NO	2787	2787	0.412	0.412	0.412
AT1G08410	Q9SJF1	AT1G08410	DIG6, LSG1-2	P-loop containing nucleoside triphosphate hydrolases superfamily protein	1.10357	1.11184	0.952977	1.03378	1.06526	0.911397	1.05613	1.00348	N.S.	0.994	-0.009	0.97952	2.77276	2.76175	2.87834	2.96153	3.05779	3.12109	2.80428	3.0468	1/1.5<=FC<=1.5	1.23	0.299	0.00243	Non-Target	NO	NO	NO	NO	NO	NO	NO	2267	2267	0.427	0.427	0.427
AT1G08420	F4HW26, Q9SJF0	BSL2	BSL2	BRI1 suppressor 1 (BSU1)-like 2	3.29903	3.20277	3.11712	3.44894	3.1874	3.20643	3.2063	3.28092	N.S.	1.141	0.19	0.3573	2.72025	2.69911	3.0969	3.04233	3.26916	3.47284	2.83875	3.26144	1/1.5<=FC<=1.5	1.171	0.227	0.00638	Non-Target	NO	NO	NO	NO	NO	NO	NO	4020, 4103	4103	0.456, 0.461	0.461	0.458
AT1G08430	Q9SJE9	ALMT1	ALMT1, ATALMT1	aluminum-activated malate transporter 1	0.27445	0.29295	0.303637	0.25076	0.205295	0.561492	0.290346	0.339182	N.A.	N.A.	N.A.	N.A.	0.731099	0.932957	0.71735	1.406	1.42785	1.33379	0.793802	1.38921	UP	3.077	1.622	1.2e-08	Non-Target	NO	NO	NO	NO	NO	NO	NO	1961	1961	0.392	0.392	0.392
AT1G08440	Q9SJE8	AT1G08440		aluminum activated malate transporter family protein	0	0	0.0473291	0	0.171215	0.173897	0.0157764	0.115037	N.A.	N.A.	N.A.	N.A.	0.163773	0.13907	0.26671	0.304092	0.303818	0.4646	0.189851	0.357503	N.A.	N.A.	N.A.	N.A.	N.A.	NO	NO	NO	NO	NO	NO	NO	1807	1807	0.4	0.4	0.4
AT1G08450	F4HW29, F4HW30, O04153, Q0WLL6	CRT3	AtCRT3, CRT3, EBS2, PSL1	calreticulin 3	3.82796	3.68165	3.52904	3.04315	2.98874	2.97601	3.67955	3.00263	DOWN	0.543	-0.881	1e-06	3.24495	3.30634	3.32742	3.0775	3.19209	3.21267	3.2929	3.16075	1/1.5<=FC<=1.5	0.818	-0.289	7e-16	Non-Target	NO	NO	NO	3UTR	3UTR	3UTR	NO	1307, 1502, 1615	1615	0.419, 0.415, 0.428	0.428	0.421
AT1G08460	A0A1P8AMF5, Q94EJ2	HDA08	ATHDA8, HDA08, HDA8	histone deacetylase 8	2.60835	2.68768	2.66637	2.32889	2.56251	2.5392	2.65413	2.47687	N.S.	0.904	-0.146	0.57539	2.84298	2.87518	3.0292	3.10736	3.05796	2.97585	2.91579	3.04706	N.S.	0.913	-0.131	0.10656	PERMISSIVE	NO	YES	NO	NO	3UTR	3UTR	NO	1715, 2374	2374	0.444, 0.429	0.444	0.436
AT1G08470	Q8VWF6	SSL3	SSL3	strictosidine synthase-like 3	2.61895	2.41006	2.24888	2.02632	1.9694	1.93189	2.42596	1.97587	1/1.5<=FC<=1.5	0.677	-0.564	0.02164	2.99977	2.93042	2.96022	2.87746	2.96284	2.8184	2.96347	2.88623	1/1.5<=FC<=1.5	0.817	-0.292	8.6e-10	Non-Target	NO	NO	NO	NO	NO	NO	NO	1571	1571	0.418	0.418	0.418
AT1G08480	Q941A6	SDH6	SDH6	succinate dehydrogenase subunit	5.74893	5.63201	5.58031	5.36991	5.53503	5.53033	5.65375	5.47842	N.S.	0.907	-0.141	0.47514	5.81906	5.78416	5.7329	5.54977	5.49095	5.45075	5.77871	5.49716	1/1.5<=FC<=1.5	0.751	-0.413	1.1e-05	STRINGENT	3UTR	YES	YES	NO	3UTR	3UTR	Stop codon	900	900	0.422	0.422	0.422
AT1G08490	Q93WX6	CPNIFS	ATCPNIFS, ATNFS2, ATSUFS, CPNIFS, SUFS	chloroplastic NIFS-like cysteine desulfurase	3.30847	3.21718	3.09024	3.11764	3.12467	3.11058	3.20529	3.11763	N.S.	0.976	-0.035	0.88437	2.49508	2.362	2.56372	2.58328	2.50979	2.64941	2.4736	2.58083	N.S.	0.964	-0.053	0.27772	STRINGENT	3UTR	YES	NO	3UTR, CDS	3UTR	3UTR	3' UTR	1824	1824	0.435	0.435	0.435
AT1G08500	O82083	ENODL18	AtENODL18, ENODL18	early nodulin-like protein 18	4.70325	4.59059	4.37349	4.45041	4.29886	4.44469	4.55578	4.39799	N.S.	0.917	-0.124	0.56524	3.42894	3.22708	3.2539	3.08621	3.05977	3.05434	3.30331	3.06677	1/1.5<=FC<=1.5	0.683	-0.55	2.7e-05	Non-Target	NO	NO	NO	NO	NO	NO	NO	1286	1286	0.365	0.365	0.365
AT1G08510	Q9SJE2	FATB	FATB	fatty acyl-ACP thioesterases B	4.39436	4.24277	4.12022	4.24739	3.95489	4.00503	4.25245	4.0691	N.S.	0.902	-0.148	0.49287	4.32551	4.22007	4.39203	4.33225	4.37816	4.43267	4.31254	4.38103	1/1.5<=FC<=1.5	0.893	-0.163	2.4e-06	Non-Target	NO	NO	NO	3UTR	3UTR	3UTR	Stop codon	2241	2241	0.407	0.407	0.407
AT1G08520	Q9SJE1	ALB1	ALB-1V, ALB1, CHLD, PDE166, V157	ALBINA 1	1.82757	1.75863	1.60844	1.62024	1.66919	1.49398	1.73155	1.59447	N.S.	0.923	-0.116	0.67716	1.81455	1.84019	2.24557	2.07884	2.38242	2.47507	1.96677	2.31211	N.S.	1.167	0.223	0.05699	STRINGENT	3UTR	YES	NO	NO	3UTR	3UTR	Stop codon	2643	2643	0.441	0.441	0.441
AT1G08530	A0A178W3K2, A0A1P8ARK6, A0A1P8ARM9, Q0WNC2, Q9FRS9	AT1G08530		chitinase-like protein	2.34421	2.1411	1.96068	1.93571	1.7788	1.79207	2.14866	1.83553	N.S.	0.79	-0.34	0.22701	2.07088	2.24599	2.11339	1.98667	1.90606	1.79365	2.14342	1.89546	1/1.5<=FC<=1.5	0.798	-0.326	4.9e-05	Non-Target	NO	NO	NO	NO	NO	NO	NO	1255, 1266, 1326	1326	0.406, 0.409, 0.402	0.409	0.406
AT1G08540	O22056	SIG2	ABC1, ATSIG1, ATSIG2, SIG1, SIG2, SIGA, SIGB	RNApolymerase sigma subunit 2	1.95467	1.86482	1.92843	1.74702	1.53488	1.68012	1.91597	1.654	N.S.	0.821	-0.284	0.27688	1.58367	1.70053	1.8826	1.85054	1.97492	1.82653	1.72227	1.884	N.S.	1.001	0.001	0.99257	Non-Target	NO	NO	NO	NO	3UTR	3UTR, CDS	Stop codon	2049	2049	0.433	0.433	0.433
AT1G08550	A0A178WJT3, A0A178WLI7, Q39249	NPQ1	AVDE1, NPQ1	non-photochemical quenching 1	1.02089	1.15036	1.2013	1.31231	1.32209	1.4986	1.12418	1.37767	N.S.	1.364	0.448	0.15848	0.689452	0.759766	0.838917	0.853539	1.21697	1.22793	0.762712	1.09948	N.S.	1.152	0.204	0.11015	Non-Target	NO	NO	NO	NO	NO	3UTR	Stop codon	1764, 2289, 2584	2584	0.402, 0.414	0.414	0.41
AT1G08560	Q42374	111	ATSYP111, KN, SYP111	syntaxin of plants 111	0.969323	0.181447	0.394211	0.27272	0.361274	0.187864	0.514994	0.273953	N.S.	0.823	-0.281	0.31522	3.56606	3.64965	3.64525	3.45332	3.43794	3.46885	3.62032	3.45337	1/1.5<=FC<=1.5	0.759	-0.397	2.9e-08	Non-Target	NO	NO	NO	NO	NO	NO	NO	1386	1386	0.415	0.415	0.415
AT1G08570	A8MQQ7, O64654, O64654-2	ACHT4	ACHT4	atypical CYS HIS rich thioredoxin 4	5.31658	5.69902	5.74742	5.63833	5.83753	5.72425	5.58768	5.73337	N.S.	1.161	0.215	0.41619	3.77798	3.91105	4.03513	4.08536	3.98713	4.05327	3.90805	4.04192	1/1.5<=FC<=1.5	0.839	-0.254	0.00294	Non-Target	NO	NO	NO	NO	NO	3UTR	NO	1268, 1324, 1340, 1714	1714	0.408, 0.428, 0.427, 0.437	0.437	0.425
AT1G08580	A0A178W812, Q9FRS7	AT1G08580		hypothetical protein	3.05962	2.52065	2.36823	2.57199	2.42831	2.45628	2.6495	2.48552	N.S.	0.899	-0.154	0.62165	4.70691	4.73764	4.60442	4.72358	4.51497	4.35968	4.68299	4.53274	N.S.	0.979	-0.03	0.829	PERMISSIVE	NO	YES	YES	NO	NO	3UTR	Stop codon	855	855	0.399	0.399	0.399
AT1G08590	Q9FRS6	AT1G08590	ATPXL1, PXL1	Leucine-rich receptor-like protein kinase family protein	3.06854	2.93337	2.69418	2.81017	2.51682	2.56226	2.8987	2.62975	N.S.	0.827	-0.273	0.22782	2.75051	2.65951	2.91074	2.9579	2.92555	3.1077	2.77359	2.99705	N.S.	0.972	-0.041	0.74424	Non-Target	NO	NO	NO	NO	NO	NO	NO	3743	3743	0.422	0.422	0.422
AT1G08600	F4HW51, F4HW51-2	ATRX	ATRX, CHR20	P-loop containing nucleoside triphosphate hydrolases superfamily protein	1.95214	1.94468	1.93291	1.78069	1.74796	1.57827	1.94324	1.70231	N.S.	0.828	-0.271	0.21678	1.16783	1.07433	1.37416	1.40451	2.00406	2.02783	1.20544	1.81213	UP	1.548	0.631	1e-07	Non-Target	NO	NO	NO	NO	NO	NO	Stop codon	4809, 4869, 4872, 5000	5000	0.416, 0.419	0.419	0.418
AT1G08610	Q9FRS4	AT1G08610		Pentatricopeptide repeat (PPR) superfamily protein	0.210962	0.221194	0.149448	0.10527	0.230254	0.0513298	0.193868	0.128951	N.A.	N.A.	N.A.	N.A.	1.1184	1.27892	1.37011	1.71237	1.62059	1.81115	1.25581	1.7147	1/1.5<=FC<=1.5	1.354	0.437	4.4e-06	Non-Target	NO	NO	NO	NO	NO	NO	NO	2143	2143	0.416	0.416	0.416
AT1G08620	A0A178WLV0, A0A1P8AMS3, C0SUT9	PKDM7D	PKDM7D	Transcription factor jumonji (jmj) family protein / zinc finger (C5HC2 type) family protein	1.92099	1.94291	1.95292	2.03547	2.01909	1.96289	1.93894	2.00582	N.S.	1.132	0.179	0.42196	2.02597	1.91163	2.16702	2.35616	2.43944	2.38983	2.03487	2.39514	1/1.5<=FC<=1.5	1.213	0.278	8.4e-08	PERMISSIVE	NO	YES	NO	NO	NO	NO	Stop codon	4422, 4426, 4483, 4531	4531	0.417, 0.415	0.417	0.416
AT1G08630	A0A1P8ASQ3, Q8RXU4, Q8RXU4-2	THA1	THA1	threonine aldolase 1	0.319531	0.333382	0.458924	0.218898	0.159424	0.231937	0.370612	0.203419	N.A.	N.A.	N.A.	N.A.	0.0332084	0.167502	0.108102	0.172691	0.757023	0.257916	0.102937	0.395877	N.A.	N.A.	N.A.	N.A.	Non-Target	NO	NO	NO	NO	NO	5UTR	NO	1354, 1391, 1393, 1404, 1433, 1466, 1870	1870	0.429, 0.427, 0.411, 0.435, 0.436, 0.431	0.436	0.428
AT1G08640	Q93WG3	CJD1	CJD1	Chloroplast J-like domain 1	2.03986	1.51122	1.68512	1.54491	1.40985	1.29702	1.7454	1.41726	N.S.	0.762	-0.393	0.20102	2.95455	2.88878	3.05212	2.8341	2.98675	2.97401	2.96515	2.93162	1/1.5<=FC<=1.5	0.886	-0.175	9.7e-05	N.A.	3UTR	NO	NO	NO	3UTR	3UTR	3' UTR	1649	1649	0.412	0.412	0.412
AT1G08645	A0A1P8AWW1	AT1G08645		hypothetical protein	0.885181	0	0.503927	0.962876	0	1.13113	0.463036	0.698001	N.S.	1.064	0.089	0.66093	2.80351	2.29774	2.36514	3.05625	2.93973	0	2.4888	1.99866	N.S.	1.015	0.021	0.75994	N.A.	NO	NO	NO	NO	NO	NO	NO	429	429	0.485	0.485	0.485
AT1G08650	F4HXN6, Q9SPK4	PPCK1	ATPPCK1, PPCK1	phosphoenolpyruvate carboxylase kinase 1	4.78204	5.02576	5.01021	4.52366	4.67023	4.56205	4.93934	4.58531	N.S.	0.765	-0.387	0.07757	4.58133	4.44734	4.55933	4.91681	4.71279	4.6898	4.52933	4.77313	N.S.	1.042	0.059	0.4641	Non-Target	NO	NO	NO	NO	NO	NO	NO	1130, 1514	1514	0.434, 0.442	0.442	0.438
AT1G08660	A0A1P8AM36, F4HXN8, Q8VZJ0	MGP2	MGP2, SIA1	MALE GAMETOPHYTE DEFECTIVE 2	3.35449	2.97968	2.7241	3.02945	2.67192	2.71007	3.01942	2.80381	N.S.	0.874	-0.194	0.48565	3.11341	3.02021	3.11253	3.13233	3.04582	3.0398	3.08205	3.07265	1/1.5<=FC<=1.5	0.895	-0.159	0.01036	Non-Target	NO	NO	NO	NO	NO	3UTR	NO	1560, 1849, 1936	1936	0.425, 0.421, 0.417	0.425	0.421
AT1G08670	A0A1P8ART5, Q9FRR8	AT1G08670		ENTH/VHS family protein	1.7322	1.12014	1.20042	1.6589	1.93222	1.77692	1.35092	1.78935	N.S.	1.479	0.565	0.11489	2.52998	2.43852	2.43264	2.78681	2.54385	2.5858	2.46705	2.63882	N.S.	0.872	-0.198	0.16575	Non-Target	NO	NO	NO	NO	NO	NO	NO	980, 1163	1163	0.392, 0.375	0.392	0.384
AT1G08680	A0A1P8ANR5, F4HXP0, Q8RXE7, Q8RXE7-2, Q8RXE7-3	ZIGA4	AGD14, ZIGA4	ARF GAP-like zinc finger-containing protein ZIGA4	3.00769	3.11162	3.21384	3.24024	3.1306	3.0465	3.11105	3.13911	N.S.	1.076	0.106	0.6659	2.53474	2.30498	2.71247	2.74608	2.94872	3.0851	2.5174	2.92664	N.S.	1.102	0.14	0.07083	Non-Target	NO	NO	NO	3UTR	NO	3UTR	3' UTR	2403, 2634, 2757, 2761, 2968	2968	0.433, 0.422, 0.421, 0.415	0.433	0.422
AT1G08695	P82622	SCRL3	SCRL3	SCR-like 3	0	0	0	0	0	0.833624	0	0.277875	N.A.	N.A.	N.A.	N.A.	N.E.	N.E.	N.E.	N.E.	N.E.	N.E.	N.E.	N.E.	N.E.	N.E.	N.E.	N.E.	N.A.	NO	NO	NO	NO	NO	NO	NO	383	383	0.347	0.347	0.347
AT1G08700	O64668	PS1	PS1	Presenilin-1	2.28311	1.97327	1.87694	2.37456	2.17594	2.13094	2.04444	2.22715	N.S.	1.24	0.31	0.23779	3.22118	3.38688	3.36231	3.69872	3.74306	3.79057	3.32345	3.74412	1/1.5<=FC<=1.5	1.167	0.223	0.00662	Non-Target	NO	NO	NO	NO	NO	NO	NO	1761	1761	0.434	0.434	0.434
AT1G08710	A0A178WE03, Q9CAZ0, Q9CAZ0-2	AT1G08710		F-box family protein	2.297	2.12029	2.14941	2.3436	2.64265	2.42317	2.1889	2.46981	N.S.	1.376	0.461	0.07514	1.67254	1.65216	1.65575	1.7574	1.7828	1.78631	1.66015	1.7755	1/1.5<=FC<=1.5	1.164	0.22	0.00974	Non-Target	NO	NO	NO	NO	NO	NO	NO	1206, 1508	1508	0.426, 0.405	0.426	0.416
AT1G08720	A0A178WJP2, A0A1P8AUW3, Q9FPR3	EDR1	ATEDR1, EDR1	Protein kinase superfamily protein	2.38622	2.44985	2.36269	2.52528	2.3747	2.34466	2.39959	2.41488	N.S.	1.075	0.104	0.66126	1.4049	1.39182	1.69766	1.64516	1.71021	1.62163	1.49813	1.659	N.S.	1.11	0.15	0.2242	Non-Target	NO	NO	NO	NO	NO	3UTR	Stop codon	3181, 3260	3260	0.441, 0.443	0.443	0.442
AT1G08730	A0A1P8APW4, F4HXP9	XIC	ATXIC, XIC	Myosin family protein with Dil domain-containing protein	0.559225	0.482476	0.366403	0.241767	0.0653925	0.206309	0.469368	0.171156	N.A.	N.A.	N.A.	N.A.	0.341647	0.282314	0.279389	0.270171	0.32422	0.312156	0.301116	0.302182	N.S.	0.994	-0.009	0.9522	N.A.	NO	NO	NO	NO	NO	NO	NO	4739, 5270	5270	0.419, 0.42	0.42	0.42
AT1G08750	C0Z231, Q8GYI6, Q8LFF3	AT1G08750	ATGPI8, GPI8	Peptidase C13 family	3.13444	2.80087	2.58355	2.24326	2.07182	2.36681	2.83962	2.2273	DOWN	0.579	-0.787	0.00267	2.39127	2.25121	2.53134	2.37804	2.44032	2.38654	2.39127	2.40164	N.S.	0.958	-0.062	0.35057	Non-Target	NO	NO	NO	NO	NO	NO	NO	1388, 1553, 1619	1619	0.406, 0.41, 0.411	0.411	0.409
AT1G08760	Q9FRR2	AT1G08760	CORD2	GPI-anchored adhesin-like protein, putative (DUF936)	2.80407	2.66168	2.56695	2.72436	2.69524	2.51811	2.67757	2.6459	N.S.	1.029	0.042	0.87009	2.47254	2.35127	2.60315	2.62117	2.6849	2.63096	2.47565	2.64568	N.S.	0.985	-0.021	0.69887	Non-Target	NO	NO	NO	3UTR	NO	NO	NO	2895	2895	0.43	0.43	0.43
AT1G08770	Q9FRR1	PRA1.E	PRA1.E	prenylated RAB acceptor 1.E	3.27195	3.09459	3.34463	3.67583	3.58098	3.72735	3.23705	3.66139	UP	1.578	0.658	0.00153	3.85009	3.92639	3.95222	3.8873	3.98762	3.9298	3.90957	3.93491	1/1.5<=FC<=1.5	0.848	-0.238	0.0024	Non-Target	NO	NO	NO	NO	NO	NO	NO	1016	1016	0.438	0.438	0.438
AT1G08780	Q9M4B5	AIP3	AIP3, PFD4	ABI3-interacting protein 3	3.79994	3.43779	3.33664	3.19978	3.02715	3.20994	3.52479	3.14562	N.S.	0.75	-0.415	0.09166	4.49028	4.32546	4.20756	3.94731	3.9016	3.88009	4.3411	3.90967	1/1.5<=FC<=1.5	0.695	-0.524	2.1e-07	PERMISSIVE	NO	YES	YES	3UTR	3UTR	3UTR	NO	724	724	0.407	0.407	0.407
AT1G08790	Q9FRR0	AT1G08790		1-phosphatidylinositol-4,5-bisphosphate phosphodiesterase epsilon-1, putative (DUF1685)	0.0882856	0.196949	0	0	0.168283	0	0.0950782	0.0560942	N.A.	N.A.	N.A.	N.A.	N.E.	N.E.	N.E.	N.E.	N.E.	N.E.	N.E.	N.E.	N.E.	N.E.	N.E.	N.E.	N.A.	NO	NO	NO	NO	NO	NO	NO	709	709	0.465	0.465	0.465
AT1G08800	F4HXQ7	AT1G08800	MyoB1	myosin-binding protein (Protein of unknown function, DUF593)	3.6245	3.7056	3.82118	3.63828	3.53109	3.61019	3.71709	3.59319	N.S.	0.94	-0.089	0.70448	2.08659	1.93565	2.37008	2.5478	2.6095	2.56008	2.13077	2.57246	1/1.5<=FC<=1.5	1.258	0.331	1.4e-11	Non-Target	NO	NO	NO	NO	NO	NO	NO	4034, 4161, 4407, 4536	4536	0.386, 0.388, 0.395, 0.393	0.395	0.39
AT1G08810	Q8GYP5, Q8GYP5-2	MYB60	AtMYB60, MYB60	myb domain protein 60	0.711146	0.649452	0.769613	1.25493	1.15276	1.03448	0.71007	1.14739	N.S.	1.685	0.753	0.07312	0.122793	0.220674	0.144105	0.189518	0.434056	0.357237	0.162524	0.326937	N.A.	N.A.	N.A.	N.A.	Non-Target	NO	NO	NO	NO	NO	NO	NO	953, 1206, 1317	1317	0.381, 0.376, 0.373	0.381	0.377
AT1G08820	B9DHD7	VAP27-2	VAP27-2	vamp/synaptobrevin-associated protein 27-2	4.01807	3.74884	3.80422	3.84667	3.69958	3.53776	3.85705	3.69467	N.S.	0.919	-0.122	0.58617	3.41052	3.37297	3.52374	3.33045	3.26878	3.24375	3.43574	3.28099	1/1.5<=FC<=1.5	0.769	-0.38	< 2e-16	Non-Target	NO	NO	NO	NO	3UTR	3UTR	3' UTR	1716, 1996, 2371, 2435, 2589	2589	0.407, 0.414, 0.413, 0.416, 0.436	0.436	0.417
AT1G08830	A0A178WKK8, P24704	1	AtSOD1, CSD1, SOD1	copper/zinc superoxide dismutase 1	6.49529	6.49259	6.42235	6.37565	6.61449	6.54796	6.47008	6.5127	N.S.	1.104	0.143	0.49629	6.48176	6.08763	6.2385	5.40735	5.13456	5.15234	6.2693	5.23142	DOWN	0.59	-0.761	7.2e-07	STRINGENT	3UTR,3UTR	YES	YES	3UTR	3UTR	3UTR	NO	806, 873	873	0.446, 0.445	0.446	0.446
AT1G08840	A0A1P8ASU0, A0A1P8ASY1, A0A1P8ASY1-2, A0A1P8ASY1-3, F4HXR5	emb2411	emb2411, JHS1	DNA replication helicase	0.245752	0.328584	0.404475	0.484896	0.459605	0.502254	0.32627	0.482251	N.A.	N.A.	N.A.	N.A.	0.498006	0.433312	0.672445	0.58731	0.874913	0.930865	0.534588	0.797696	1/1.5<=FC<=1.5	1.428	0.514	5e-05	Non-Target	NO	NO	NO	NO	NO	NO	NO	3291, 4153, 4248, 4254, 4340	4340	0.42, 0.431, 0.432, 0.424	0.432	0.428
AT1G08845	F4HXR7, Q8GW22	AT1G08845	HES	Ribosomal L18p/L5e family protein	1.41268	1.47962	1.6947	1.76413	2.09922	2.16545	1.529	2.0096	UP	1.654	0.726	0.03874	2.69422	2.62707	2.60162	2.76161	2.7356	2.64804	2.64097	2.71508	N.S.	1.007	0.01	0.93406	Non-Target	NO	NO	NO	NO	NO	NO	NO	705, 781, 1017	1017	0.454, 0.418, 0.411	0.454	0.428
AT1G08860	Q5XQC7	BON3	BON3	Calcium-dependent phospholipid-binding Copine family protein	0.0506779	0.0598196	0	0.313759	0.143868	0.099772	0.0368325	0.1858	N.A.	N.A.	N.A.	N.A.	0.0317477	0	0.0137658	0	0.0169181	0	0.0151712	0.00563936	N.A.	N.A.	N.A.	N.A.	N.A.	NO	NO	NO	NO	NO	NO	NO	2151	2151	0.417	0.417	0.417
AT1G08880	O04848	H2AXA	G-H2AX, GAMMA-H2AX, H2AXA, HTA5	Histone superfamily protein	4.05296	3.71413	3.72428	3.90813	3.89489	3.79247	3.83046	3.86516	N.S.	1.085	0.118	0.60327	4.90059	4.97864	4.85153	4.60649	4.61803	4.57851	4.91025	4.60101	1/1.5<=FC<=1.5	0.737	-0.441	6.6e-08	Non-Target	NO	NO	NO	NO	NO	NO	NO	1103	1103	0.393	0.393	0.393
AT1G08890	C0Z2V0, Q9SCW7	AT1G08890		Major facilitator superfamily protein	4.07391	3.96284	4.00375	3.43463	3.70555	3.81343	4.0135	3.6512	N.S.	0.774	-0.37	0.08903	2.34592	2.39209	2.84199	2.32562	2.46977	2.67602	2.52667	2.49047	1/1.5<=FC<=1.5	0.858	-0.22	0.0251	Non-Target	NO	NO	NO	NO	NO	CDS, 3UTR	NO	1874	1874	0.383	0.383	0.383
AT1G08900	A0A1P8APM7, A8MR77, C0Z2D9, Q4F7G0, Q4F7G0-2	AT1G08900		Major facilitator superfamily protein	1.48808	1.19001	0.672654	0.447806	0.444081	0.629047	1.11692	0.506978	DOWN	0.419	-1.254	0.01297	0.858056	0.794768	0.955025	0.886911	0.929921	1.16562	0.869283	0.994151	N.S.	0.932	-0.101	0.5575	Non-Target	NO	NO	NO	NO	3UTR	NO	NO	1543, 1714, 1827, 1849, 1871	1871	0.387, 0.384, 0.397, 0.385, 0.388	0.397	0.388
AT1G08910	A0A0A7EPL0, A0A0A7EPL0-2, A0A178WNE3	AT1G08910	PIAL1	zinc ion binding protein	1.57485	1.69242	1.79297	2.35844	2.05584	2.20105	1.68675	2.20511	UP	1.846	0.884	0.0005	0.675096	0.607301	1.10028	1.24233	1.45348	1.33788	0.794225	1.34457	UP	1.843	0.882	1.3e-15	Non-Target	NO	NO	NO	NO	NO	NO	NO	2909	2909	0.441	0.441	0.441
AT1G08920	A8MR75, Q94KE0, Q94KE0-2	ESL1	ESL1	ERD (early response to dehydration) six-like 1	4.22164	4.50141	4.80349	4.79337	4.41245	4.85197	4.50885	4.68593	N.S.	1.181	0.24	0.40894	3.40163	3.16787	3.33532	3.38369	3.24795	3.12759	3.3016	3.25308	N.S.	0.951	-0.073	0.47683	Non-Target	NO	NO	NO	NO	NO	NO	NO	1565, 1917, 2041	2041	0.39, 0.392, 0.403	0.403	0.395
AT1G08930	O04036	ERD6	ERD6	Major facilitator superfamily protein	4.49683	4.24558	4.40788	4.0277	4.25418	4.28485	4.38343	4.18891	N.S.	0.894	-0.161	0.46606	4.02543	4.02788	4.38984	4.26827	4.2334	4.20703	4.14772	4.23623	N.S.	0.874	-0.194	0.10121	PERMISSIVE	NO	YES	NO	NO	3UTR	3UTR	NO	1832, 2077	2077	0.4, 0.415	0.415	0.408
AT1G08940	A0A178W3B5, O04035	AT1G08940		Phosphoglycerate mutase family protein	3.02431	2.91683	2.94123	2.72263	3.15246	3.15557	2.96079	3.01022	N.S.	1.113	0.155	0.58025	2.63909	2.78904	2.99046	3.1116	3.143	3.25	2.80619	3.1682	1/1.5<=FC<=1.5	1.264	0.338	2e-05	Non-Target	NO	NO	NO	NO	NO	NO	NO	1175	1175	0.434	0.434	0.434
AT1G08960	O04034	CAX11	ATCAX11, AtCXX5, CAX11, CCX5	cation exchanger 11	1.54223	1.01295	1.08768	1.26149	0.620631	0.849274	1.21429	0.910466	N.S.	0.815	-0.295	0.39213	1.77766	1.7676	1.96091	1.81989	2.05927	2.01587	1.83539	1.96501	N.S.	1.079	0.11	0.24127	Non-Target	NO	NO	NO	NO	NO	NO	NO	2190	2190	0.425	0.425	0.425
AT1G08970	Q8L4B2	NF-YC9	HAP5C, NF-YC9	nuclear factor Y, subunit C9	3.38947	3.31235	3.44295	3.87545	3.65217	3.68241	3.38159	3.73667	1/1.5<=FC<=1.5	1.486	0.571	0.00407	3.8011	3.75349	3.79909	4.00393	3.85239	3.8912	3.78456	3.91584	N.S.	0.954	-0.067	0.30588	PERMISSIVE	NO	NO	YES	NO	3UTR	NO	3' UTR	1103, 1176, 1216, 1613	1613	0.436, 0.462, 0.448, 0.4	0.462	0.436
AT1G08980	Q9FR37	AMI1	AMI1, ATAMI1, ATTOC64-I, TOC64-I	amidase 1	0.337576	0.35942	0.410726	0.8529	0.501987	0.708772	0.369241	0.687886	N.S.	1.598	0.677	0.10764	0.952364	0.991518	1.31351	1.54612	1.75293	1.86254	1.0858	1.72053	N.S.	1.193	0.254	0.1362	PERMISSIVE	NO	YES	NO	NO	NO	3UTR	NO	1573	1573	0.45	0.45	0.45
AT1G08990	F4HZC3	PGSIP5	GUX5, PGSIP5	plant glycogenin-like starch initiation protein 5	2.93273	3.06779	3.3068	2.43425	2.43153	2.6789	3.10244	2.51489	DOWN	0.6	-0.737	0.00396	2.75817	2.53767	2.88362	2.88611	2.70265	2.85865	2.72649	2.8158	N.S.	1.089	0.123	0.05915	Non-Target	NO	NO	NO	NO	NO	NO	NO	2239	2239	0.422	0.422	0.422
AT1G09000	A0A1P8AWJ5, O22040, O22040-2	NP1	ANP1, MAPKKK1, NP1	NPK1-related protein kinase 1	1.37907	1.79438	1.78679	1.33629	1.39737	1.07055	1.65341	1.26807	N.S.	0.72	-0.474	0.14234	1.26962	1.21554	1.41213	1.2251	1.53196	1.5713	1.2991	1.44279	1/1.5<=FC<=1.5	1.139	0.188	0.00855	Non-Target	NO	NO	NO	NO	NO	NO	NO	1955, 2286	2286	0.437, 0.434	0.437	0.436
AT1G09010	Q75W54	AT1G09010		glycoside hydrolase family 2 protein	2.81466	2.6569	2.59199	2.59615	2.53979	2.52444	2.68785	2.55346	N.S.	0.93	-0.104	0.62537	2.55826	2.45647	2.97406	3.104	3.18477	3.23752	2.66293	3.17543	1/1.5<=FC<=1.5	1.139	0.188	0.0198	PERMISSIVE	NO	YES	NO	NO	3UTR	NO	NO	3087	3087	0.431	0.431	0.431
AT1G09020	Q944A6, Q944A6-2	SNF4	ATSNF4, KIN&#946;&#947;, SNF4	sucrose nonfermenting-like protein	3.52429	3.1571	3.19898	2.98953	2.78488	2.8357	3.29346	2.87004	1/1.5<=FC<=1.5	0.706	-0.502	0.01232	3.22168	3.25311	3.53428	3.3883	3.54402	3.68588	3.33636	3.5394	N.S.	1.02	0.029	0.7731	STRINGENT	3UTR	YES	YES	3UTR	NO	3UTR	Stop codon	2487	2487	0.443	0.443	0.443
AT1G09040	F4HZC9	AT1G09040		arginine-glutamic acid dipeptide repeat protein	0.866485	0.749515	0.580441	0.817013	0.968447	0.656368	0.732147	0.813942	N.S.	1.138	0.187	0.57868	0.544112	0.497493	0.58269	0.79381	0.740429	0.834674	0.541432	0.789638	N.S.	1.134	0.182	0.05224	Non-Target	NO	NO	NO	NO	NO	NO	NO	3199	3199	0.421	0.421	0.421
AT1G09050	Q8RX35	AT1G09050		arginine-glutamic acid dipeptide repeat protein	0.975244	0.665673	1.00522	0.707984	0.711513	0.906832	0.882045	0.775443	N.S.	0.92	-0.121	0.7258	0.77743	0.790767	0.758136	0.890106	0.976228	0.653616	0.775444	0.839984	N.S.	1.088	0.122	0.22067	Non-Target	NO	NO	NO	NO	NO	NO	NO	2833, 3216	3216	0.425, 0.433	0.433	0.429
AT1G09060	B9DGQ5, F4HZD1	AT1G09060	JMJ24	JmjC domain protein JMJ24	2.19157	2.04583	2.28784	2.39506	2.53367	2.42991	2.17508	2.45288	1/1.5<=FC<=1.5	1.385	0.47	0.03099	1.46821	1.44821	1.6709	1.60857	1.83099	1.89726	1.5291	1.77894	1/1.5<=FC<=1.5	1.179	0.238	0.00261	Non-Target	NO	NO	NO	CDS	3UTR	3UTR	NO	3077, 3085, 3115, 3134	3134	0.436, 0.438, 0.435	0.438	0.436
AT1G09070	O04023	SRC2	(AT)SRC2, AtSRC2, SRC2	soybean gene regulated by cold-2	6.7758	6.82132	6.89842	7.04815	7.1259	7.09102	6.83185	7.08836	1/1.5<=FC<=1.5	1.338	0.42	0.01826	4.56426	4.41698	4.42597	4.66208	4.67811	4.76607	4.46907	4.70209	1/1.5<=FC<=1.5	1.303	0.382	4.1e-06	Non-Target	NO	NO	NO	NO	NO	5UTR	NO	1606	1606	0.441	0.441	0.441
AT1G09080	A0A178WHW4, Q8H1B3, Q8H1B3-2	BIP3	BIP3	Heat shock protein 70 (Hsp 70) family protein	0.645569	1.18869	1.36909	1.62823	1.28089	1.68105	1.06778	1.53006	N.S.	1.532	0.616	0.10299	0.0164903	0.0900043	0.158248	0.363951	0.501183	0.640091	0.0882476	0.501742	UP	6.718	2.748	< 2e-16	Non-Target	NO	NO	NO	NO	NO	NO	NO	2095, 2116	2116	0.434, 0.435	0.435	0.434
AT1G09090	F4HZD8, Q9SBI0, Q9SBI0-2	RBOHB	ATRBOHB, ATRBOHB-BETA, RBOHB	respiratory burst oxidase-like protein	3.83916	3.75012	3.89004	3.79691	3.60536	4.00942	3.82644	3.80389	N.S.	1.045	0.063	0.81492	1.44627	1.44224	1.81361	1.64622	1.77826	1.97027	1.56737	1.79825	N.S.	0.957	-0.063	0.57761	Non-Target	NO	NO	NO	NO	NO	NO	NO	2627, 2701	2701	0.432, 0.438	0.438	0.435
AT1G09100	O04019	RPT5B	RPT5B	26S proteasome AAA-ATPase subunit RPT5B	3.40224	3.13521	3.00257	2.91707	2.7031	2.78561	3.18001	2.80193	N.S.	0.743	-0.428	0.05186	3.63654	3.53744	3.65424	3.71818	3.73555	3.73804	3.60941	3.73059	N.S.	1.029	0.042	0.497	Non-Target	NO	NO	NO	3UTR	NO	NO	NO	1524	1524	0.429	0.429	0.429
AT1G09130	F4HZE0, Q8L770	AT1G09130		ATP-dependent caseinolytic (Clp) protease/crotonase family protein	3.41535	3.36335	3.36282	3.2783	3.44664	3.2974	3.38051	3.34078	N.S.	1.023	0.033	0.89922	3.44635	3.4056	3.67719	3.57159	3.78257	3.86972	3.50972	3.74129	1/1.5<=FC<=1.5	1.115	0.157	0.001	STRINGENT	3UTR,CDS,3UTR,3UTR	YES	YES	NO	3UTR, CDS	3UTR, CDS, 5UTR	Stop codon	1270, 1338, 1448	1448	0.445, 0.444, 0.454	0.454	0.448
AT1G09140	A0A178WN40, A0A178WN91, A0A1P8AN11, O80496, Q9XFR5, Q9XFR5-2	SR30	At-SR30, ATSRP30, SR30	SERINE-ARGININE PROTEIN 30	4.7242	4.77125	4.89076	5.07604	5.24015	5.1792	4.7954	5.16513	1/1.5<=FC<=1.5	1.489	0.575	0.00289	3.552	3.54556	3.64294	4.07541	4.1391	4.12456	3.58016	4.11302	1/1.5<=FC<=1.5	1.381	0.466	2e-05	PERMISSIVE	NO	YES	YES	NO	3UTR	3UTR	3' UTR	1314, 1652, 2256	2256	0.409, 0.43, 0.431	0.431	0.423
AT1G09150	Q8L7N2	AT1G09150		pseudouridine synthase and archaeosine transglycosylase (PUA) domain-containing protein	4.11278	3.74871	3.68832	3.0967	2.98999	3.14244	3.84994	3.07638	DOWN	0.494	-1.018	1.1e-06	3.87884	3.93068	3.90577	3.68824	3.65596	3.63726	3.90509	3.66049	1/1.5<=FC<=1.5	0.705	-0.504	< 2e-16	STRINGENT	3UTR	YES	YES	NO	3UTR	3UTR	Stop codon	1213	1213	0.412	0.412	0.412
AT1G09155	A0A178W6I7, O80494	PP2-B15	AtPP2-B15, PP2-B15	phloem protein 2-B15	0.649788	0.648228	0.882352	0.832441	0.7186	0.975574	0.726789	0.842205	N.S.	1.119	0.162	0.63508	1.48604	1.16289	1.62025	1.73692	1.56694	1.52753	1.42306	1.61046	N.S.	1.044	0.062	0.56445	Non-Target	NO	NO	NO	NO	NO	NO	NO	1227	1227	0.4	0.4	0.4
AT1G09157	O80493	AT1G09157	DMP8	transmembrane protein, putative (DUF679)	0.669609	1.0659	0.952369	0.855779	0.897822	0.710527	0.89596	0.821376	N.S.	0.98	-0.03	0.93379	0	0	0	0	0.0533938	0	0	0.0177979	N.A.	N.A.	N.A.	N.A.	N.A.	NO	NO	NO	NO	NO	NO	NO	856	856	0.454	0.454	0.454
AT1G09160	O80492	AT1G09160		Protein phosphatase 2C family protein	3.12529	2.95946	2.80401	3.146	2.978	2.95971	2.96292	3.0279	N.S.	1.122	0.166	0.45816	2.69527	2.69261	2.79865	2.90475	2.97853	2.84	2.72884	2.90776	N.S.	1.05	0.07	0.33211	PERMISSIVE	NO	YES	NO	NO	3UTR	NO	NO	2098, 2186	2186	0.414, 0.418	0.418	0.416
AT1G09170	A0A1P8ATE2, A0A1P8ATF3, A0A1P8ATG3, A0A1P8ATH5, A0A1P8ATI1	AT1G09170		P-loop nucleoside triphosphate hydrolases superfamily protein with CH (Calponin Homology) domain-containing protein	1.89265	2.08411	1.92784	2.00326	1.65508	1.72637	1.9682	1.7949	N.S.	0.902	-0.148	0.59273	0.808986	0.6752	0.933843	1.0486	1.04062	1.01469	0.80601	1.03464	1/1.5<=FC<=1.5	1.257	0.33	0.00944	Non-Target	NO	NO	NO	NO	NO	NO	NO	2337, 3196, 3593, 3731, 3776, 3787, 3856, 3862	3862	0.406, 0.407, 0.405, 0.412, 0.414, 0.426, 0.42	0.426	0.412
AT1G09176	O80490	AT1G09176		transmembrane protein	1.13398	0.732765	1.18806	1.64307	1.36398	1.93449	1.01827	1.64718	UP	1.892	0.92	0.04182	1.44207	1.64601	1.42756	1.76587	1.50059	1.84357	1.50521	1.70334	N.S.	1.128	0.173	0.17501	Non-Target	NO	NO	NO	NO	NO	NO	NO	713	713	0.421	0.421	0.421
AT1G09180	O80489	SARA1A	ATSAR1, ATSARA1A, SARA1A	secretion-associated RAS super family 1	0.583052	0.604286	0.802463	1.25306	0.798546	0.954653	0.663267	1.00209	N.S.	1.28	0.356	0.28654	0.901252	0.482429	0.518685	0.939461	0.975486	1.20277	0.634122	1.03924	1/1.5<=FC<=1.5	1.458	0.544	0.00108	Non-Target	NO	NO	NO	NO	NO	NO	NO	737	737	0.426	0.426	0.426
AT1G09190	O80488	AT1G09190		Tetratricopeptide repeat (TPR)-like superfamily protein	0.403334	0.350991	0.152347	0.224501	0.191669	0.133872	0.302224	0.183348	N.A.	N.A.	N.A.	N.A.	1.36628	1.30539	1.57864	1.719	1.64017	1.56584	1.41677	1.64167	1/1.5<=FC<=1.5	1.224	0.291	0.01609	Non-Target	NO	NO	NO	NO	NO	NO	NO	1614	1614	0.452	0.452	0.452
AT1G09195	A0A1P8AS27, A0A1P8AS45, A0A1P8AS60, F4HZF4, F4HZF5	AT1G09195		Ppx-GppA phosphatase	1.31463	1.43838	0.999891	0.716912	0.666617	0.863714	1.25097	0.749081	DOWN	0.549	-0.865	0.01996	0.535716	0.333513	0.614649	0.650778	0.747214	0.602414	0.494626	0.666802	N.S.	1.086	0.118	0.43482	Non-Target	NO	NO	NO	NO	NO	NO	NO	1946, 1950, 2135, 2195, 2250, 2267, 2304, 2413, 2443, 2502, 2674, 2707, 2710, 2826, 3010	3010	0.408, 0.404, 0.405, 0.401, 0.406, 0.392, 0.398, 0.386, 0.391, 0.4, 0.39	0.408	0.398
AT1G09200	P59226	AT1G09200	H3.1	Histone superfamily protein	5.09789	4.47227	4.22037	4.68238	4.49253	4.2904	4.59684	4.48844	N.S.	0.941	-0.088	0.78231	6.20986	6.2268	6.1279	6.11117	6.1067	6.17617	6.18819	6.13135	N.S.	0.902	-0.149	0.2884	Non-Target	NO	NO	NO	NO	NO	NO	NO	764	764	0.427	0.427	0.427
AT1G09210	Q38858	CRT1b	AtCRT1b, CRT1b, CRT2	calreticulin 1b	5.58247	5.02504	4.73118	4.8232	4.66101	4.62515	5.1129	4.70312	N.S.	0.72	-0.474	0.07578	5.7972	5.76071	5.79971	5.91695	6.02507	6.05768	5.78587	5.9999	1/1.5<=FC<=1.5	1.214	0.28	0.00026	STRINGENT	3UTR	YES	YES	NO	3UTR	3UTR	Stop codon	2201	2201	0.438	0.438	0.438
AT1G09220	Q680Z7	AT1G09220		Pentatricopeptide repeat (PPR) superfamily protein	0.0335044	0.279915	0.100138	0.0471994	0	0	0.137852	0.0157331	N.A.	N.A.	N.A.	N.A.	0.680152	0.608055	0.792155	0.808297	0.661008	1.12167	0.693454	0.863659	N.S.	1.049	0.069	0.57073	Non-Target	NO	NO	NO	NO	NO	NO	NO	1675	1675	0.411	0.411	0.411
AT1G09230	A0A178W2V7, A0A178W4X6, A0A1P8AMD5, A0A1P8AMG9, Q8RWV8, Q8RWV8-2	AT1G09230	U11/U12-65K	RNA-binding (RRM/RBD/RNP motifs) family protein	1.98099	1.70191	1.81369	2.08782	2.10248	2.13092	1.83219	2.10707	N.S.	1.37	0.454	0.07718	1.7039	1.5778	1.69756	2.00488	2.12228	2.40177	1.65976	2.17631	1/1.5<=FC<=1.5	1.29	0.368	2.5e-08	Non-Target	NO	NO	NO	NO	NO	NO	NO	1325, 1468, 1605	1605	0.417, 0.43, 0.436	0.436	0.428
AT1G09250	O80482	AT1G09250	AIF4	basic helix-loop-helix (bHLH) DNA-binding superfamily protein	4.20115	3.9739	3.66345	4.01819	3.95809	3.886	3.94617	3.95409	N.S.	1.05	0.07	0.79482	4.34369	4.31957	4.3107	4.23863	4.18361	4.1113	4.32465	4.17785	1/1.5<=FC<=1.5	0.807	-0.309	0.00175	Non-Target	NO	NO	NO	NO	NO	NO	NO	1287	1287	0.412	0.412	0.412
AT1G09260	O80481	AT1G09260		Chaperone DnaJ-domain superfamily protein	0	0	0	0.223137	0	0	0	0.0743791	N.A.	N.A.	N.A.	N.A.	0.451622	0.159448	0.147677	0.192231	0	0	0.252916	0.0640769	N.A.	N.A.	N.A.	N.A.	N.A.	NO	NO	NO	NO	NO	NO	NO	440	440	0.37	0.37	0.37
AT1G09270	O80480, O80480-2	IMPA-4	IMPA-4	importin alpha isoform 4	5.17778	5.06923	4.98797	4.7764	4.867	4.87415	5.07832	4.83918	N.S.	0.851	-0.233	0.17344	4.40112	4.24788	4.45328	4.47995	4.58342	4.75534	4.36742	4.60624	N.S.	1.064	0.09	0.25345	PERMISSIVE	NO	YES	YES	NO	3UTR	3UTR	Stop codon	2094, 2100, 2181	2181	0.442, 0.445, 0.439	0.445	0.442
AT1G09280	Q94AC1	AT1G09280		rhodanese-like domain protein	1.7658	1.5566	1.56553	1.46679	1.50099	1.26596	1.62931	1.41125	N.S.	0.854	-0.228	0.43583	2.12588	2.11807	2.2905	2.41415	2.38794	2.28256	2.17815	2.36155	N.S.	0.924	-0.115	0.38118	Non-Target	NO	NO	NO	NO	3UTR	NO	NO	1964	1964	0.448	0.448	0.448
AT1G09290	A0A178W796, Q8H122	AT1G09290		hypothetical protein	1.70229	1.71028	1.67276	1.74323	1.35163	1.31798	1.69511	1.47094	N.S.	0.885	-0.177	0.58601	2.58068	2.5246	2.53671	2.57605	2.5652	2.30513	2.54733	2.48213	N.S.	0.91	-0.136	0.07386	PERMISSIVE	NO	YES	NO	NO	NO	NO	NO	1337	1337	0.427	0.427	0.427
AT1G09300	F4HZG9, F4HZG9-2	AT1G09300	AtICP55	Metallopeptidase M24 family protein	1.23096	1.27923	1.12283	1.62044	1.39573	1.30338	1.211	1.43985	N.S.	1.35	0.433	0.15802	2.03737	2.04672	2.16513	2.433	2.33673	2.59862	2.08307	2.45611	1/1.5<=FC<=1.5	1.321	0.402	5.2e-11	PERMISSIVE	NO	YES	YES	3UTR	NO	5UTR	NO	1950, 2129	2129	0.433, 0.421	0.433	0.427
AT1G09310	Q9ZPZ4	AT1G09310		plant/protein (Protein of unknown function, DUF538)	0.480749	0.256127	0.175116	1.66691	0.619353	0.317577	0.303997	0.867947	UP	2.512	1.329	0.04001	1.4536	3.09533	2.73262	4.19179	5.45398	4.22746	2.42718	4.62441	UP	3.692	1.884	3.4e-06	Non-Target	NO	NO	NO	NO	NO	5UTR, 3UTR, CDS	NO	989	989	0.428	0.428	0.428
AT1G09320	Q500V5	AT1G09320	ADCP1, AGDP1	agenet domain-containing protein	1.41737	1.48	1.48993	1.43348	1.55449	1.47447	1.46243	1.48748	N.S.	1.076	0.105	0.73727	1.47215	1.49372	1.64357	1.5423	1.78264	1.71167	1.53648	1.67887	N.S.	1.054	0.076	0.22253	Non-Target	NO	NO	NO	NO	NO	NO	NO	2113	2113	0.434	0.434	0.434
AT1G09330	A0A1P8ANI1, Q8LEK2	AT1G09330	ECH	golgi apparatus membrane protein-like protein ECHIDNA protein	4.97008	4.67402	4.4262	3.98482	3.89285	4.04526	4.6901	3.97431	DOWN	0.531	-0.914	1.5e-05	4.69572	4.61344	4.67368	4.49298	4.54035	4.6112	4.66095	4.54818	1/1.5<=FC<=1.5	0.8	-0.322	4.5e-05	STRINGENT	3UTR,3UTR	YES	NO	NO	3UTR	3UTR	NO	1177, 1751	1751	0.392, 0.384	0.392	0.388
AT1G09340	A0A1P8ATL2, Q9SA52	CRB	CRB, CSP41B, HIP1.3	chloroplast RNA binding protein	0.674879	0.618902	0.473059	0.361596	0.349514	0.547813	0.588947	0.419641	N.A.	N.A.	N.A.	N.A.	1.98249	2.0693	2.34624	2.57049	3.02558	2.37165	2.13268	2.65591	N.S.	1.055	0.077	0.51786	STRINGENT	3UTR,3UTR	YES	YES	NO	CDS, 3UTR	3UTR, CDS	Stop codon	1876, 2012	2012	0.425, 0.432	0.432	0.428
AT1G09350	A0A1P8AN71, O80518	GolS3	AtGolS3, GolS3	galactinol synthase 3	0.68003	0.44068	0.611617	1.11844	0.572757	0.535132	0.577443	0.742109	N.S.	1.194	0.256	0.44764	0.84635	1.06555	1.30668	0.892386	1.16215	1.49199	1.07286	1.18218	1/1.5<=FC<=1.5	0.738	-0.439	0.00203	Non-Target	NO	NO	NO	NO	NO	NO	NO	989, 1483	1483	0.434, 0.418	0.434	0.426
AT1G09390	O80522	AT1G09390		GDSL-like Lipase/Acylhydrolase superfamily protein	1.72689	1.31862	0.958769	0.598776	0.428665	0.483706	1.33476	0.503716	DOWN	0.288	-1.794	0.00062	2.04731	1.97633	2.27493	1.95292	1.79503	2.09233	2.09952	1.94676	1/1.5<=FC<=1.5	0.692	-0.53	1.9e-07	Non-Target	NO	NO	NO	3UTR	NO	3UTR	NO	1498	1498	0.427	0.427	0.427
AT1G09400	A0A1P8AT55, Q8GYA3	AT1G09400		FMN-linked oxidoreductases superfamily protein	0.0957701	0	0	0	0	0.242952	0.0319234	0.0809842	N.A.	N.A.	N.A.	N.A.	0.125876	0.105782	0.230012	0.116113	0.100429	0	0.15389	0.0721807	N.A.	N.A.	N.A.	N.A.	N.A.	NO	NO	NO	NO	NO	NO	NO	1182, 1453	1453	0.447, 0.406	0.447	0.426
AT1G09410	Q56XI1, Q56XI1-2	AT1G09410		pentatricopeptide (PPR) repeat-containing protein	0.047516	0	0	0.159132	0.135268	0	0.0158387	0.0981335	N.A.	N.A.	N.A.	N.A.	0.30794	0.249828	0.327477	0.633546	0.549005	0.688731	0.295082	0.623761	UP	1.591	0.67	1.2e-07	Non-Target	NO	NO	NO	NO	NO	NO	NO	2288	2288	0.427	0.427	0.427
AT1G09415	Q9FNZ4	NIMIN-3	NIMIN-3	NIM1-interacting 3	0.651498	0.392674	0.224781	0.254946	0.699728	0.481196	0.422984	0.478623	N.S.	1.022	0.032	0.90583	1.18571	1.31253	1.59594	1.43818	1.61153	1.56102	1.36473	1.53691	N.S.	1.005	0.007	0.96863	Non-Target	NO	NO	NO	NO	NO	NO	NO	655	655	0.38	0.38	0.38
AT1G09420	F4I0Y8, Q93ZW0	G6PD4	G6PD4	glucose-6-phosphate dehydrogenase 4	0.784037	0.115774	0.429167	0.2286	0.571097	0.518157	0.442993	0.439285	N.S.	0.996	-0.006	0.98466	0.962019	1.06516	1.12709	1.05947	1.27186	1.37831	1.05142	1.23654	N.S.	1.114	0.156	0.13382	Non-Target	NO	NO	NO	NO	NO	NO	NO	2160, 2237	2237	0.428, 0.427	0.428	0.428
AT1G09430	O80526	ACLA-3	ACLA-3	ATP-citrate lyase A-3	4.50837	4.48138	4.5749	4.25651	4.46066	4.43045	4.52155	4.38254	N.S.	0.937	-0.094	0.6783	4.22869	4.29454	4.40514	4.41779	4.3967	4.37565	4.30946	4.39671	1/1.5<=FC<=1.5	0.897	-0.158	0.00017	STRINGENT	3UTR	YES	YES	NO	3UTR	3UTR	3' UTR	1977	1977	0.408	0.408	0.408
AT1G09440	F4I0Z0	AT1G09440		Protein kinase superfamily protein	1.91329	2.09298	2.08018	2.13222	1.57793	1.74599	2.02881	1.81871	N.S.	0.899	-0.153	0.62355	1.62068	1.55187	1.55676	1.74285	1.66912	1.89242	1.57644	1.76813	N.S.	0.963	-0.055	0.56427	Non-Target	NO	NO	NO	NO	NO	NO	NO	1847, 2014	2014	0.401, 0.394	0.401	0.398
AT1G09450	O80528	Haspin	AtHaspin, Haspin	Protein kinase superfamily protein	0.357877	0.058301	0.210664	0.279905	0	0.0972937	0.208947	0.125733	N.A.	N.A.	N.A.	N.A.	0.826524	0.794659	1.0458	0.955412	1.21049	1.26333	0.888994	1.14308	N.S.	1.057	0.08	0.41918	PERMISSIVE	NO	YES	NO	NO	NO	NO	NO	2205	2205	0.414	0.414	0.414
AT1G09460	A0A178WHF5, F4I0Z2, O80529	AT1G09460		Carbohydrate-binding X8 domain superfamily protein	2.24063	2.25189	2.62125	2.7152	2.72393	2.50385	2.37125	2.64766	N.S.	1.32	0.401	0.14551	2.16848	2.48816	2.62062	2.69616	2.90034	2.79404	2.42575	2.79684	1/1.5<=FC<=1.5	1.195	0.257	0.00321	Non-Target	NO	NO	NO	NO	NO	NO	NO	1466	1466	0.435	0.435	0.435
AT1G09470	F4I0Z3, Q4PT37	AT1G09470	AtNEAP3	myosin heavy chain, cardiac protein	0.273396	0.107818	0.0719625	0.0660705	0.185829	0	0.151059	0.0839664	N.A.	N.A.	N.A.	N.A.	1.28503	1.19064	1.1631	1.02425	1.01894	1.19698	1.21293	1.08006	1/1.5<=FC<=1.5	0.809	-0.306	0.00769	Non-Target	NO	NO	NO	NO	NO	NO	NO	1237, 1365, 1494	1494	0.413, 0.414, 0.42	0.42	0.416
AT1G09480	F4I0Z5, O80531	AT1G09480		NAD(P)-binding Rossmann-fold superfamily protein	1.57804	1.64586	1.45551	1.95921	1.58913	1.21768	1.55981	1.58867	N.S.	1.101	0.139	0.6888	1.11767	1.05551	1.13119	1.30404	1.2541	1.20267	1.10146	1.2536	N.S.	1.059	0.083	0.61241	Non-Target	NO	NO	NO	NO	NO	NO	NO	1206	1206	0.42, 0.415	0.42	0.418
AT1G09490	B3H5K4, O80532	AT1G09490		NAD(P)-binding Rossmann-fold superfamily protein	2.334	1.94223	2.13167	2.30204	2.72648	2.36647	2.13597	2.465	N.S.	1.426	0.512	0.06864	2.27239	2.11642	2.17992	2.03493	2.08323	2.03287	2.18958	2.05035	N.S.	0.885	-0.177	0.14037	Non-Target	NO	NO	NO	NO	NO	3UTR	NO	1339, 1754	1754	0.403, 0.382	0.403	0.392
AT1G09500	B9DG15, F4I101, O80533	AT1G09500		NAD(P)-binding Rossmann-fold superfamily protein	0.117195	0.257732	0.0471355	0.335563	0.657425	0.27401	0.140688	0.422333	N.A.	N.A.	N.A.	N.A.	0.277501	0.114423	0.188841	0	0.66067	0.192424	0.193588	0.284365	N.A.	N.A.	N.A.	N.A.	Non-Target	NO	NO	NO	NO	NO	NO	NO	983, 1421, 1814	1814	0.393, 0.377, 0.433	0.433	0.401
AT1G09510	Q5PP57	AT1G09510		NAD(P)-binding Rossmann-fold superfamily protein	0	0.228397	0	0	0.194949	0	0.0761323	0.064983	N.A.	N.A.	N.A.	N.A.	0	0	0.0608618	0	0	0	0.0202873	0	N.A.	N.A.	N.A.	N.A.	N.A.	NO	NO	NO	NO	NO	NO	NO	1106	1106	0.43	0.43	0.43
AT1G09520	O80535	AT1G09520		hypothetical protein	2.43105	2.52915	2.5653	2.67801	2.94637	2.78066	2.5085	2.80168	N.S.	1.383	0.468	0.06567	2.998	2.95783	3.05699	3.26423	3.28443	3.21402	3.00427	3.25423	N.S.	1.048	0.067	0.26899	Non-Target	NO	NO	NO	NO	NO	NO	NO	1160	1160	0.448	0.448	0.448
AT1G09530	O80536	PIF3	PAP3, PIF3, POC1	phytochrome interacting factor 3	0.755243	0.478083	0.824673	0.812068	0.958887	0.793625	0.686	0.85486	N.S.	1.224	0.292	0.39623	0.747706	0.662762	0.966559	1.12359	1.3007	1.28677	0.792342	1.23702	1/1.5<=FC<=1.5	1.224	0.292	0.04783	Non-Target	NO	NO	NO	NO	3UTR	NO	NO	2143, 2203, 2280, 2340, 2567, 2704	2704	0.434, 0.417, 0.435, 0.427, 0.41, 0.428	0.435	0.425
AT1G09540	Q8VZQ2	MYB61	ATMYB61, MYB61	myb domain protein 61	3.80774	3.94208	3.87943	3.84576	3.21356	3.5896	3.87641	3.54964	N.S.	0.822	-0.282	0.28657	1.87656	1.57049	1.79358	1.84742	1.88452	2.01372	1.74688	1.91522	N.S.	0.916	-0.127	0.36107	Non-Target	NO	NO	NO	NO	NO	NO	NO	1558	1558	0.398	0.398	0.398
AT1G09560	P94014	GLP5	GLP5, PDGLP1	germin-like protein 5	6.05367	5.82619	5.77514	5.89531	5.90338	5.952	5.885	5.9169	N.S.	1.09	0.125	0.50241	6.56673	6.8781	6.7387	6.74401	6.90264	6.95835	6.72785	6.86833	N.S.	0.971	-0.042	0.74422	Non-Target	NO	NO	NO	NO	3UTR	NO	NO	1227	1227	0.415	0.415	0.415
AT1G09570	A0A1P8AVD9, P14712, P14712-2	PHYA	FHY2, FRE1, HY8, PHYA	phytochrome A	3.20552	3.10583	3.05523	3.43317	3.27702	3.10473	3.12219	3.27164	N.S.	1.226	0.294	0.14256	3.42249	3.55665	3.8142	4.0598	4.10672	4.10768	3.59778	4.0914	1/1.5<=FC<=1.5	1.274	0.349	3.7e-08	STRINGENT	3UTR,3UTR,3UTR,3UTR,3UTR,3UTR	YES	YES	NO	3UTR	3UTR	Stop codon	3738, 3841, 4079, 4387, 4549, 4595	4595	0.433, 0.444, 0.439, 0.432, 0.431, 0.449	0.449	0.438
AT1G09575	F4I111	AT1G09575	MCU1	calcium uniporter-like protein (DUF607)	2.5661	2.20219	2.31421	2.58493	2.23123	2.13485	2.36083	2.317	N.S.	1.022	0.031	0.92794	1.91451	1.67385	1.71688	1.80244	1.49779	1.291	1.76841	1.53041	1/1.5<=FC<=1.5	0.81	-0.305	0.00192	Non-Target	NO	NO	NO	NO	NO	NO	NO	1206, 1925	1925	0.388, 0.403	0.403	0.396
AT1G09580	Q6IDL4	AT1G09580		emp24/gp25L/p24 family/GOLD family protein	4.12554	3.57936	3.33189	2.37537	2.44004	2.45536	3.67893	2.42359	DOWN	0.287	-1.8	5.1e-10	3.9926	3.97932	3.86693	3.48663	3.3028	3.35286	3.94628	3.38076	DOWN	0.53	-0.916	1.2e-13	PERMISSIVE	NO	YES	NO	NO	NO	NO	NO	1093	1093	0.419	0.419	0.419
AT1G09590	Q43291	AT1G09590		Translation protein SH3-like family protein	5.55886	4.88485	4.75304	4.06381	4.00205	4.02149	5.06558	4.02911	DOWN	0.377	-1.407	1.7e-07	7.21584	7.19553	7.13074	6.74663	6.71331	6.71853	7.1807	6.72616	1/1.5<=FC<=1.5	0.676	-0.566	6.4e-07	STRINGENT	3UTR	YES	YES	NO	3UTR	3UTR	Stop codon	872	872	0.429	0.429	0.429
AT1G09600	F4I114	AT1G09600		Protein kinase superfamily protein	0.713568	0.257117	0.219174	0.243081	0.190712	0.380512	0.39662	0.271435	N.S.	0.87	-0.201	0.52637	0.527704	0.517188	0.703571	0.621775	0.719994	0.798009	0.582821	0.71326	N.S.	1.011	0.016	0.90545	Non-Target	NO	NO	NO	NO	NO	NO	NO	3100	3100	0.415	0.415	0.415
AT1G09610	Q6NMK1	GXM3	GXM1	glucuronoxylan 4-O-methyltransferase-like protein (DUF579)	0.814809	0.733756	0.777707	1.10622	0.469759	0.701251	0.775424	0.759075	N.S.	1.041	0.058	0.87278	1.46497	1.36273	1.48121	1.31394	1.12566	1.09733	1.43631	1.17898	DOWN	0.648	-0.625	4.7e-14	Non-Target	NO	NO	NO	NO	NO	NO	NO	1180	1180	0.423	0.423	0.423
AT1G09620	F4I116, O04485	AT1G09620		ATP binding/leucine-tRNA ligases/aminoacyl-tRNA ligase	2.89335	2.46536	2.51266	2.92808	2.84208	2.65876	2.62379	2.80964	N.S.	1.248	0.32	0.15938	3.39673	3.35202	3.57138	3.76938	4.03144	4.1842	3.44004	3.99501	1/1.5<=FC<=1.5	1.357	0.44	1.9e-09	PERMISSIVE	NO	YES	NO	NO	3UTR	5UTR, 3UTR	NO	3720	3720	0.433	0.433	0.433
AT1G09625	A0A178W121, Q1G3V0	AT1G09625		transmembrane protein	0	0	0	0.229205	0	0	0	0.0764017	N.A.	N.A.	N.A.	N.A.	N.E.	N.E.	N.E.	N.E.	N.E.	N.E.	N.E.	N.E.	N.E.	N.E.	N.E.	N.E.	N.A.	NO	NO	NO	NO	NO	NO	NO	431	431	0.353	0.353	0.353
AT1G09630	O04486	RAB11c	ATRAB-A2A, ATRAB11C, ATRABA2A, RAB-A2A, RAB11c	RAB GTPase 11C	4.22035	3.99483	3.65193	3.06191	3.10344	3.19496	3.9557	3.1201	DOWN	0.464	-1.107	2.3e-06	4.10335	4.01888	4.09341	3.49788	3.52488	3.63644	4.07188	3.55307	DOWN	0.595	-0.749	< 2e-16	Non-Target	NO	NO	NO	3UTR	NO	NO	NO	1093	1093	0.397	0.397	0.397
AT1G09640	C0Z2L8, O04487	AT1G09640		Translation elongation factor EF1B, gamma chain	4.73815	4.43573	4.42999	4.28738	4.2301	4.22661	4.53462	4.24803	N.S.	0.81	-0.304	0.08303	5.29734	5.39253	5.41253	5.33595	5.46138	5.59372	5.36747	5.46368	1/1.5<=FC<=1.5	0.873	-0.196	0.00993	STRINGENT	3UTR,3UTR,3UTR	YES	YES	NO	3UTR	3UTR	3' UTR	1057, 1950	1950	0.436, 0.45	0.45	0.443
AT1G09645	Q6GKX8	AT1G09645		transmembrane protein	4.32127	4.23744	4.20642	3.87878	4.04891	4.06029	4.25504	3.99599	N.S.	0.841	-0.25	0.21728	4.15259	4.1138	4.18132	3.82771	3.85493	3.38199	4.14924	3.68821	DOWN	0.652	-0.616	< 2e-16	PERMISSIVE	NO	YES	NO	NO	NO	NO	NO	870	870	0.376	0.376	0.376
AT1G09650	O04488	AT1G09650		F-box and associated interaction domains-containing protein	0.235342	0.172931	0.343424	0.106948	0.100123	0.10175	0.250566	0.10294	N.A.	N.A.	N.A.	N.A.	0.364903	0.328728	0.215843	0.244582	0.361901	0.180348	0.303158	0.262277	N.A.	N.A.	N.A.	N.A.	N.A.	NO	NO	NO	NO	NO	NO	NO	2110	2110	0.402	0.402	0.402
AT1G09660	Q8GWR3, Q8GWR3-2	AT1G09660		RNA-binding KH domain-containing protein	3.09441	2.30804	1.83813	1.96106	1.8053	1.64957	2.41353	1.80531	DOWN	0.567	-0.818	0.03259	3.629	3.60667	3.68445	3.47692	3.51998	3.51683	3.64004	3.50458	N.S.	0.895	-0.16	0.08106	PERMISSIVE	NO	YES	YES	NO	3UTR	NO	Stop codon	1396, 1459, 1462	1462	0.442, 0.438, 0.437	0.442	0.439
AT1G09665	Q3EDF9	AT1G09665		Toll-Interleukin-Resistance (TIR) domain family protein	0.212238	0	0	0	0	0	0.070746	0	N.A.	N.A.	N.A.	N.A.	0	0.0885043	0	0	0	0	0.0295014	0	N.A.	N.A.	N.A.	N.A.	N.A.	NO	NO	NO	NO	NO	NO	NO	585	585	0.421	0.421	0.421
AT1G09680	O04491	AT1G09680		Pentatricopeptide repeat (PPR) superfamily protein	0.052173	0	0.0794699	0	0.101003	0.102644	0.043881	0.0678824	N.A.	N.A.	N.A.	N.A.	0.480098	0.316356	0.505817	0.57634	0.543605	0.636915	0.43409	0.58562	1/1.5<=FC<=1.5	1.379	0.464	0.00028	Non-Target	NO	NO	NO	NO	NO	NO	NO	2092	2092	0.409	0.409	0.409
AT1G09690	Q43291	AT1G09690		Translation protein SH3-like family protein	5.92522	5.36542	5.20082	4.59708	4.42757	4.45722	5.49715	4.49396	DOWN	0.394	-1.343	4.5e-08	8.07559	7.99535	7.88119	7.67929	7.66488	7.58485	7.98404	7.64301	1/1.5<=FC<=1.5	0.71	-0.495	1.1e-05	STRINGENT	3UTR	YES	YES	NO	3UTR	3UTR	Stop codon	968	968	0.437	0.437	0.437
AT1G09700	A0A1P8AQD8, O04492, O04492-2	HYL1	AtDRB1, DRB1, HYL1	dsRNA-binding domain-like superfamily protein	1.49172	1.45204	1.54404	1.80619	1.63658	1.66917	1.49593	1.70398	N.S.	1.294	0.372	0.19198	2.31655	2.51676	2.45163	2.55669	2.6741	2.59727	2.42831	2.60935	N.S.	1.046	0.065	0.26549	Non-Target	NO	NO	NO	NO	NO	NO	NO	1272, 1806	1806	0.423, 0.414	0.423	0.418
AT1G09710	A0A178WIF1, A0A1P8AVB1, F4I129, Q6R0D2	AT1G09710	DP1	Homeodomain-like superfamily protein	0.887661	0.971778	0.964445	1.38884	1.05491	1.26675	0.941295	1.23683	N.S.	1.492	0.578	0.08213	0.831856	0.807968	0.977643	1.03018	1.11166	1.19977	0.872489	1.11387	N.S.	1.162	0.217	0.09741	Non-Target	NO	NO	NO	NO	NO	NO	NO	1935, 2135, 2154, 2159, 2254	2254	0.454, 0.457, 0.462, 0.458, 0.461	0.462	0.458
AT1G09720	F4I131	NET2B	NET2B	Kinase interacting (KIP1-like) family protein	0.129417	0.0457732	0.0591336	0.13094	0.0384175	0.0766573	0.0781081	0.0820048	N.A.	N.A.	N.A.	N.A.	N.E.	N.E.	N.E.	N.E.	N.E.	N.E.	N.E.	N.E.	N.E.	N.E.	N.E.	N.E.	N.A.	NO	NO	NO	NO	NO	NO	NO	2787	2787	0.429	0.429	0.429
AT1G09730	F4I133, Q8L7S0	AT1G09730	ASP1, SPF1	Cysteine proteinases superfamily protein	2.99534	3.06101	3.03439	2.99309	3.01734	2.88912	3.03025	2.96651	N.S.	0.998	-0.003	0.98549	1.84517	1.74164	2.04352	2.1368	2.15963	2.12084	1.87678	2.13909	N.S.	1.102	0.14	0.06244	Non-Target	NO	NO	NO	NO	NO	3UTR	NO	3344, 3386	3386	0.413, 0.412	0.413	0.412
AT1G09740	Q84TF6	AT1G09740		Adenine nucleotide alpha hydrolases-like superfamily protein	4.43235	4.56651	4.7523	4.48187	4.7093	4.87862	4.58372	4.68993	N.S.	1.146	0.197	0.46002	5.65339	5.56992	5.72935	5.74432	5.6372	5.50051	5.65089	5.62734	N.S.	0.986	-0.02	0.86174	STRINGENT	3UTR,3UTR	YES	YES	3UTR	NO	3UTR	NO	985, 1011	1011	0.438, 0.423	0.438	0.43
AT1G09750	O04496	AT1G09750		Eukaryotic aspartyl protease family protein	3.12848	2.70891	2.72682	1.46054	1.48352	1.74028	2.85474	1.56145	DOWN	0.254	-1.979	5e-13	2.31475	2.39401	2.404	1.89902	2.22955	2.61337	2.37092	2.24731	N.S.	0.898	-0.156	0.29313	Non-Target	NO	NO	NO	NO	NO	NO	CDS	1578	1578	0.511	0.511	0.511
AT1G09760	P43333	U2A'	U2A'	U2 small nuclear ribonucleoprotein A	3.69085	3.19549	3.42004	3.00799	3.02896	3.01684	3.43546	3.01793	1/1.5<=FC<=1.5	0.711	-0.492	0.02808	4.21918	4.26711	4.28857	4.13019	4.07077	4.01987	4.25829	4.07361	1/1.5<=FC<=1.5	0.744	-0.426	1.3e-14	STRINGENT	3UTR	YES	YES	3UTR	3UTR	3UTR	3' UTR	1190	1190	0.419	0.419	0.419
AT1G09770	P92948	CDC5	ATCDC5, ATMYBCDC5, CDC5	cell division cycle 5	3.18365	3.01404	3.10759	3.31051	3.38065	3.18904	3.10176	3.2934	N.S.	1.274	0.35	0.05562	3.11998	3.22294	3.42952	3.66961	3.85649	3.86774	3.25748	3.79795	1/1.5<=FC<=1.5	1.219	0.286	6.6e-06	PERMISSIVE	NO	YES	NO	NO	3UTR	3UTR	CDS	3199	3199	0.434	0.434	0.434
AT1G09780	O04499	iPGAM1	iPGAM1	Phosphoglycerate mutase, 2,3-bisphosphoglycerate-independent	5.42663	5.36618	5.2994	5.61752	5.72293	5.64376	5.36407	5.6614	1/1.5<=FC<=1.5	1.409	0.495	0.00132	5.6522	5.7449	5.73264	6.02445	6.14583	6.32225	5.70991	6.16418	1/1.5<=FC<=1.5	1.309	0.389	0.00255	STRINGENT	3UTR	YES	YES	NO	3UTR	3UTR	NO	1966	1966	0.442	0.442	0.442
AT1G09790	A0A1P8AU31, O04500	COBL6	COBL6	COBRA-like protein 6 precursor	0.0391351	0	0.0598949	0	0.0762274	0	0.03301	0.0254091	N.A.	N.A.	N.A.	N.A.	0.179189	0.742226	0.580137	0.330427	0.279266	0.88925	0.500517	0.499648	N.S.	1.099	0.136	0.43811	N.A.	NO	NO	NO	NO	NO	NO	NO	1451, 1665	1665	0.427, 0.441	0.441	0.434
AT1G09794	F4I2K8	AT1G09794		Cox19 family protein (CHCH motif)	3.63855	3.96424	4.02867	3.76796	4.20312	4.16204	3.87716	4.04437	N.S.	1.193	0.254	0.37899	1.71915	1.51234	1.87876	1.46992	2.05423	1.30941	1.70341	1.61119	N.S.	1.056	0.079	0.58897	Non-Target	NO	NO	NO	NO	NO	NO	NO	672	672	0.369	0.369	0.369
AT1G09795	Q8GSJ1	ATP-PRT2	ATATP-PRT2, ATP-PRT2, HISN1B	ATP phosphoribosyl transferase 2	3.32245	3.5334	3.72997	3.38191	3.82965	3.76421	3.52861	3.65859	N.S.	1.161	0.216	0.45149	2.43686	2.54335	2.68767	2.5269	2.65087	2.95661	2.55596	2.71146	N.S.	0.967	-0.048	0.61043	Non-Target	NO	NO	NO	NO	3UTR	3UTR	Stop codon	1516	1516	0.443	0.443	0.443
AT1G09800	F4I2L0, O04501	AT1G09800		Pseudouridine synthase family protein	2.17814	2.21239	2.47758	1.93349	1.55635	1.66283	2.28937	1.71756	DOWN	0.607	-0.721	0.01526	2.2794	2.43204	2.33276	2.35561	2.24695	2.28519	2.34807	2.29592	N.S.	0.879	-0.185	0.11471	PERMISSIVE	NO	YES	YES	NO	NO	NO	NO	1517, 1755	1755	0.442, 0.453	0.453	0.448
AT1G09810	A0A1P8ANN7, A1L4X2, Q56XH8	ECT11	ECT11	evolutionarily conserved C-terminal region 11	1.04512	0.471783	1.03582	1.09321	0.697804	0.804754	0.850908	0.865255	N.S.	1.023	0.033	0.93472	1.64342	1.35973	1.61673	1.96423	1.92495	2.1186	1.53996	2.00259	1/1.5<=FC<=1.5	1.332	0.413	1.3e-06	Non-Target	NO	NO	NO	3UTR	NO	NO	NO	1668, 1785, 1856	1856	0.396, 0.415, 0.411	0.415	0.407
AT1G09812	A0A178W150, Q5Q0H9, Q5Q0I0	AT1G09812		multidrug resistance protein	1.59289	1.36212	1.26338	2.01183	1.41924	1.3436	1.40613	1.59156	N.S.	1.23	0.299	0.3847	0.673532	0.681733	0.561956	0.643471	0.562405	0.78175	0.639074	0.662542	N.S.	1.024	0.034	0.8348	Non-Target	NO	NO	NO	NO	NO	3UTR	NO	1036	1036	0.373	0.373	0.373
AT1G09815	Q1H568	POLD4	POLD4	polymerase delta 4	3.38421	3.41383	3.49368	3.4404	3.54974	3.66795	3.43057	3.55269	N.S.	1.173	0.23	0.35266	4.66733	4.65436	4.59492	4.72146	4.78482	4.75607	4.63887	4.75411	N.S.	0.98	-0.03	0.71192	Non-Target	NO	NO	NO	NO	NO	NO	NO	726	726	0.467	0.467	0.467
AT1G09820	O04504	AT1G09820		Pentatricopeptide repeat (PPR-like) superfamily protein	0.586861	0.387569	0.325849	0.425665	0.434737	0.183495	0.433426	0.347966	N.A.	N.A.	N.A.	N.A.	1.37709	1.27933	1.36229	1.51697	1.51022	1.37654	1.33957	1.46791	1/1.5<=FC<=1.5	1.129	0.175	0.02026	Non-Target	NO	NO	NO	NO	NO	NO	NO	2235	2235	0.406	0.406	0.406
AT1G09830	P52420	PUR2	PUR2	Glycinamide ribonucleotide (GAR) synthetase	1.75481	1.1926	1.48143	1.59996	1.30242	1.21451	1.47628	1.3723	N.S.	0.948	-0.077	0.82682	2.97481	3.14955	3.16522	3.16104	3.27605	3.44247	3.09652	3.29319	N.S.	1.066	0.092	0.37745	PERMISSIVE	NO	YES	NO	NO	NO	3UTR	NO	1922	1922	0.452	0.452	0.452
AT1G09840	A0A1P8AUK7, C0Z256, Q39019	SK41	AtHIR1, ATSK41, SK41	shaggy-like protein kinase 41	3.02741	2.78646	2.66704	2.75775	2.63331	2.63592	2.82697	2.67566	N.S.	0.917	-0.125	0.60407	3.28069	3.18303	3.30776	3.42268	3.32748	3.41755	3.25716	3.38924	N.S.	1.063	0.088	0.11968	PERMISSIVE	NO	YES	NO	5UTR	3UTR	3UTR	NO	1300, 1678, 1791, 1828, 1935, 1973, 2049, 2120, 2128, 2195, 2199	2199	0.402, 0.397, 0.393, 0.394, 0.391, 0.417, 0.415, 0.414, 0.411, 0.408	0.417	0.405
AT1G09850	Q0WVJ5	XBCP3	XBCP3	xylem bark cysteine peptidase 3	3.88312	3.8095	3.69128	2.63075	2.33942	2.84674	3.79463	2.60564	DOWN	0.326	-1.616	4e-12	3.54895	3.58073	3.65216	3.5203	3.46149	3.57894	3.59395	3.52024	1/1.5<=FC<=1.5	0.819	-0.288	3.1e-12	PERMISSIVE	NO	YES	YES	NO	3UTR	NO	NO	1752	1752	0.42	0.42	0.42
AT1G09860	O04508	PUP16	ATPUP16, PUP16	purine permease 16	0.65682	0.507327	0.536657	0.738998	0.509104	0.250011	0.566935	0.499371	N.S.	0.989	-0.016	0.96215	0.28139	0.247241	0.227555	0.230086	0.228437	0.149611	0.252062	0.202711	N.A.	N.A.	N.A.	N.A.	N.A.	NO	NO	NO	NO	NO	NO	NO	1294	1294	0.44	0.44	0.44
AT1G09870	Q941B2, Q9ASV3	AT1G09870		histidine acid phosphatase family protein	3.29785	2.90814	2.83585	2.81068	2.75516	2.52727	3.01395	2.6977	N.S.	0.791	-0.338	0.15984	3.60026	3.51327	3.55081	3.7925	3.86914	3.97423	3.55478	3.87862	1/1.5<=FC<=1.5	1.101	0.139	0.02998	PERMISSIVE	NO	YES	YES	NO	NO	3UTR	Stop codon	1972	1972	0.425	0.425	0.425
AT1G09880	A0A1P8AV46, A0A1P8AV55, A0A1P8AV80, O04510	AT1G09880		Rhamnogalacturonate lyase family protein	0.0842217	0.130059	0.0827885	0.0657999	0	0.0574346	0.0990232	0.0410782	N.A.	N.A.	N.A.	N.A.	0.325498	0.364121	0.402827	0.403903	0.416634	0.303789	0.364149	0.374776	1/1.5<=FC<=1.5	1.281	0.357	0.00412	N.A.	NO	NO	NO	NO	NO	NO	NO	1925, 2011, 2226, 2319	2319	0.408, 0.412, 0.417, 0.418	0.418	0.414
AT1G09890	A0A1P8AQ50, A0A1P8AQ61, A0A1P8AQ71, A0A1P8AQ77, F4I2M6	AT1G09890		Rhamnogalacturonate lyase family protein	1.10334	1.2712	0.893726	1.67649	1.2927	1.22216	1.08942	1.39711	N.S.	1.464	0.55	0.10368	0.928769	0.782581	0.947048	1.30555	1.14154	1.47739	0.886133	1.30816	1/1.5<=FC<=1.5	1.412	0.498	3e-06	Non-Target	NO	NO	NO	NO	NO	NO	NO	1899, 2090, 2152, 2224, 2311	2311	0.397, 0.401, 0.398, 0.406, 0.418	0.418	0.404
AT1G09900	Q3EDF8	AT1G09900		Pentatricopeptide repeat (PPR-like) superfamily protein	0.408744	0.0721448	0.136526	0.125996	0.363516	0.0617478	0.205805	0.183753	N.A.	N.A.	N.A.	N.A.	1.37495	1.45223	1.60804	1.66701	1.72919	1.74852	1.47841	1.7149	N.S.	1.205	0.269	0.07659	Non-Target	NO	NO	NO	NO	NO	CDS	NO	1797	1797	0.417	0.417	0.417
AT1G09910	A0A1P8AQL5, F4I2M8	AT1G09910		Rhamnogalacturonate lyase family protein	1.52099	1.30105	1.32615	1.63961	1.49711	1.33001	1.38273	1.48891	N.S.	1.173	0.23	0.43081	1.66835	1.58525	1.79163	1.96951	1.99694	1.91934	1.68174	1.96193	N.S.	1.147	0.197	0.0796	Non-Target	NO	NO	NO	NO	NO	3UTR	NO	2116, 2234, 2781	2781	0.435, 0.444, 0.424	0.444	0.434
AT1G09920	Q8L7A5	AT1G09920		TRAF-type zinc finger-like protein	4.62454	4.76184	4.83719	4.40763	4.56697	4.6458	4.74119	4.54013	N.S.	0.887	-0.173	0.47009	4.10933	3.98692	3.94945	3.86372	3.76629	3.55424	4.01523	3.72809	1/1.5<=FC<=1.5	0.762	-0.393	2.2e-10	N.A.	3UTR	NO	NO	StopCodon, 3UTR	3UTR	3UTR	Stop codon	981	981	0.404	0.404	0.404
AT1G09930	O04514	OPT2	ATOPT2, OPT2	oligopeptide transporter 2	0.0448405	0	0	0.0319927	0	0.045241	0.0149468	0.0257446	N.A.	N.A.	N.A.	N.A.	N.E.	N.E.	N.E.	N.E.	N.E.	N.E.	N.E.	N.E.	N.E.	N.E.	N.E.	N.E.	N.A.	NO	NO	NO	NO	NO	NO	NO	2419	2419	0.423	0.423	0.423
AT1G09932	A0A1P8AQZ0, A0A1P8AQZ3, A8MQJ6, Q8GWG7	AT1G09932		Phosphoglycerate mutase family protein	1.71483	1.53572	1.35593	1.9892	1.62874	1.92216	1.5355	1.8467	N.S.	1.408	0.494	0.11621	0.491218	0.641353	0.534986	0.591734	0.66203	1.14946	0.555852	0.801075	UP	1.847	0.885	0.00112	Non-Target	NO	NO	NO	NO	NO	NO	NO	1135, 1213, 1281, 1290	1290	0.387, 0.381, 0.38, 0.383	0.387	0.383
AT1G09935	A0A1P8AR03, F4I2N3	AT1G09935		Phosphoglycerate mutase family protein	0.0730711	0	0.111273	0	0	0	0.061448	0	N.A.	N.A.	N.A.	N.A.	N.E.	N.E.	N.E.	N.E.	N.E.	N.E.	N.E.	N.E.	N.E.	N.E.	N.E.	N.E.	N.A.	NO	NO	NO	NO	NO	NO	NO	832, 869	869	0.429, 0.413	0.429	0.421
AT1G09940	P49294	HEMA2	HEMA2	Glutamyl-tRNA reductase family protein	3.8178	3.82978	3.91647	3.78435	3.5959	3.81613	3.85468	3.73213	N.S.	0.949	-0.076	0.75047	2.29792	2.26202	2.59171	2.38888	2.22571	2.3962	2.38388	2.33693	1/1.5<=FC<=1.5	0.875	-0.193	0.01421	Non-Target	NO	NO	NO	NO	NO	NO	NO	2201	2201	0.431	0.431	0.431
AT1G09950	O04515	RAS1	RAS1	RESPONSE TO ABA AND SALT 1	4.32289	4.51624	4.37791	5.09296	4.76574	4.55802	4.40568	4.80558	UP	1.532	0.615	0.0108	0.709743	0.516107	0.553049	0.787961	0.978844	0.617699	0.592966	0.794835	1/1.5<=FC<=1.5	1.49	0.576	2.1e-05	Non-Target	NO	NO	NO	NO	NO	NO	NO	1333	1333	0.427	0.427	0.427
AT1G09960	Q9FE59	SUT4	ATSUC4, ATSUT4, SUC4, SUT4	sucrose transporter 4	2.59195	2.46838	2.48783	2.95106	2.52454	2.5678	2.51605	2.68113	N.S.	1.246	0.318	0.1938	2.1628	2.10327	2.2779	2.0504	2.3524	2.19034	2.18132	2.19771	N.S.	0.908	-0.139	0.19488	Non-Target	NO	NO	NO	NO	NO	NO	NO	2217	2217	0.431	0.431	0.431
AT1G09970	F4I2N7, F4I2N7-2, Q56ZX2	LRR XI-23	LRR XI-23, RLK7	Leucine-rich receptor-like protein kinase family protein	4.75808	4.75967	4.89077	5.17927	5.02675	5.09593	4.80284	5.10065	1/1.5<=FC<=1.5	1.394	0.479	0.00724	3.79146	4.00585	4.22712	4.2764	4.45665	4.55194	4.00814	4.42833	N.S.	1.128	0.174	0.06478	Non-Target	NO	NO	NO	NO	CDS, 3UTR	NO	CDS	3251, 3595	3595	0.438, 0.449	0.449	0.444
AT1G09980	A8MRZ8, Q8RXV4	AT1G09980		Putative serine esterase family protein	2.37898	2.30937	2.33335	2.25359	2.10056	2.15755	2.34057	2.17057	N.S.	0.899	-0.154	0.48797	2.07594	1.89166	2.22073	2.08365	2.19709	2.20542	2.06278	2.16205	N.S.	1.004	0.005	0.95033	Non-Target	NO	NO	NO	3UTR	3UTR	NO	NO	3156, 3307, 3513	3513	0.399, 0.404, 0.408	0.408	0.404
AT1G09995	O80591, Q29QC1, Q56YE8, Q8LF91	AT1G09995		DNA repair DEAD helicase RAD3/XP-D subfamily protein	1.89156	1.81356	1.57797	1.90065	1.74891	1.65928	1.76103	1.76962	N.S.	1.054	0.076	0.83211	2.47879	2.11013	2.29852	2.4805	2.3972	1.86892	2.29581	2.24887	N.S.	0.947	-0.078	0.41821	Non-Target	NO	NO	NO	NO	NO	NO	NO	727, 762, 860, 958, 1068	1068	0.361, 0.358, 0.373, 0.369, 0.377	0.377	0.368
AT1G10000	F4I2P2	AT1G10000		Ribonuclease H-like superfamily protein	0.162546	0.0993185	0.18621	0.36327	0.422046	0.0852589	0.149358	0.290192	N.A.	N.A.	N.A.	N.A.	0.712663	0.668389	0.700681	0.880624	0.767505	0.523307	0.693911	0.723812	N.S.	0.937	-0.094	0.49166	Non-Target	NO	NO	NO	NO	NO	3UTR	NO	1327	1327	0.463	0.463	0.463
AT1G10020	O80593	AT1G10020		formin-like protein (DUF1005)	2.11416	2.16533	2.02023	2.23918	1.75195	2.03071	2.0999	2.00728	N.S.	0.987	-0.019	0.95329	2.61399	2.47883	2.61576	2.68193	2.69986	2.72813	2.56953	2.70331	N.S.	0.955	-0.066	0.48333	Non-Target	NO	NO	NO	NO	NO	NO	NO	2164	2164	0.462	0.462	0.462
AT1G10030	O80594	ERG28	ERG28	ergosterol biosynthesis protein	4.8096	4.6777	4.39285	3.87273	3.88686	3.97607	4.62672	3.91189	DOWN	0.531	-0.913	4.3e-06	5.28073	5.16746	5.18937	4.52977	4.48882	4.3869	5.21252	4.4685	DOWN	0.468	-1.095	< 2e-16	PERMISSIVE	NO	YES	YES	NO	3UTR	NO	NO	931	931	0.394	0.394	0.394
AT1G10040	F4I2P7, Q08A69	AT1G10040		alpha/beta-Hydrolases superfamily protein	0.782211	0.724664	0.930528	0.93459	0.73316	1.07887	0.812468	0.91554	N.S.	1.141	0.19	0.58116	1.35657	1.2588	1.45476	1.44143	1.47815	1.60876	1.35671	1.50945	N.S.	0.978	-0.032	0.76196	Non-Target	NO	NO	NO	NO	NO	NO	NO	1665, 1771	1771	0.411, 0.419	0.419	0.415
AT1G10050	A0A1P8AUA7, O80596	AT1G10050		glycosyl hydrolase family 10 protein / carbohydrate-binding domain-containing protein	2.73871	2.79864	2.68649	2.70808	2.86752	2.87021	2.74128	2.81527	N.S.	1.135	0.182	0.40709	1.92251	1.8277	2.09398	2.27926	2.35381	2.5294	1.94806	2.38749	1/1.5<=FC<=1.5	1.314	0.394	7.7e-13	Non-Target	NO	NO	NO	NO	NO	NO	NO	3230, 3493, 3753	3753	0.425, 0.434, 0.442	0.442	0.434
AT1G10060	A0A178WHC5, A0A1P8APA3, A0A1P8APA5, A0A1P8APB7, A0A1P8APE4, B3H7M6, F4I2Q0, Q93Y32	BCAT-1	ATBCAT-1, BCAT-1, BCAT1	branched-chain amino acid transaminase 1	0.0289013	0	0.0945908	0.0445258	0	0.121849	0.041164	0.0554581	N.A.	N.A.	N.A.	N.A.	0.0588244	0.188996	0.258399	0.0618615	0.329413	0.216381	0.16874	0.202552	N.A.	N.A.	N.A.	N.A.	Non-Target	NO	NO	NO	NO	NO	NO	NO	1769, 1775, 1795, 1810, 1923, 1982, 2058	2058	0.41, 0.407, 0.418, 0.416, 0.417, 0.393	0.418	0.411
AT1G10070	Q2V4P2, Q9M439	BCAT-2	ATBCAT-2, BCAT-2, BCAT2	branched-chain amino acid transaminase 2	0.579374	1.08409	0.859794	0.814514	0.419462	0.616171	0.841086	0.616716	N.S.	0.862	-0.214	0.52132	0.319883	0.66665	1.15461	1.20955	1.31728	0.990778	0.713714	1.17253	N.S.	1.021	0.03	0.87443	Non-Target	NO	NO	NO	NO	NO	NO	NO	1558, 1642, 1668	1668	0.41, 0.418, 0.407	0.418	0.412
AT1G10090	O80600, Q94A87	AT1G10090		Early-responsive to dehydration stress protein (ERD4)	3.20355	3.1757	3.26528	2.97116	2.83175	3.02278	3.21484	2.9419	N.S.	0.822	-0.283	0.15949	2.45354	2.44098	2.75741	2.5208	2.68322	2.86446	2.55064	2.68949	N.S.	1.046	0.065	0.43739	Non-Target	NO	NO	NO	NO	NO	NO	Stop codon	2910	2910	0.411	0.411	0.411
AT1G10095	A0A1P8AUX8, A0A1P8AV10, A0A1P8AV19, O80601, Q1KS95	AT1G10095		Protein prenylyltransferase superfamily protein	0.311604	0.269389	0.210789	0.0883487	0.159034	0.418176	0.263927	0.221853	N.A.	N.A.	N.A.	N.A.	1.13455	0.893864	1.14774	1.12874	1.2647	0.991682	1.05872	1.12837	N.S.	0.95	-0.074	0.52569	Non-Target	NO	NO	NO	NO	NO	3UTR	NO	1580, 1806, 1832, 2546	2546	0.404, 0.402, 0.412	0.412	0.405
AT1G10110	A0A178WEQ5, O80603	AT1G10110		F-box family protein	0.11967	0.0956383	0.0634939	0.165847	0.0807501	0.157908	0.0929341	0.134835	N.A.	N.A.	N.A.	N.A.	0.717294	0.347683	0.434713	0.854871	0.897259	1.03279	0.499897	0.928306	N.S.	1.206	0.27	0.08282	Non-Target	NO	NO	NO	NO	NO	NO	NO	1375	1375	0.437	0.437	0.437
AT1G10120	Q6NKN9	AT1G10120	CIB4	basic helix-loop-helix (bHLH) DNA-binding superfamily protein	3.16527	2.76983	2.58518	3.00085	2.56672	2.4457	2.84009	2.67109	N.S.	0.925	-0.113	0.71322	2.88147	2.63309	2.84617	2.91475	3.01462	2.95103	2.78691	2.96013	N.S.	1.021	0.03	0.66223	Non-Target	NO	NO	NO	NO	NO	NO	NO	1522, 2262	2262	0.39, 0.417	0.417	0.403
AT1G10130	Q9SY55	ECA3	ATECA3, ECA3	endoplasmic reticulum-type calcium-transporting ATPase 3	3.25835	2.99552	2.87548	2.68467	2.31244	2.45555	3.04312	2.48422	DOWN	0.618	-0.693	0.00158	2.64095	2.65155	2.89197	2.85253	3.03198	3.11739	2.72816	3.00063	1/1.5<=FC<=1.5	1.163	0.218	0.00065	PERMISSIVE	NO	YES	NO	3UTR	NO	3UTR	Stop codon	3534	3534	0.429	0.429	0.429
AT1G10140	Q9SY56	AT1G10140		Uncharacterized conserved protein UCP031279	5.08424	5.50249	5.65573	5.24091	5.14725	5.3014	5.41415	5.22985	N.S.	0.881	-0.182	0.51693	3.17408	3.2915	3.57064	3.1492	3.19964	3.15731	3.34541	3.16872	1/1.5<=FC<=1.5	0.721	-0.472	0.00563	Non-Target	NO	NO	NO	NO	NO	NO	NO	1182	1182	0.375	0.375	0.375
AT1G10150	Q9SY57	AT1G10150		Carbohydrate-binding protein	4.12834	4.54053	4.64134	3.66431	3.67912	4.01364	4.43674	3.78569	DOWN	0.58	-0.786	0.00445	2.47067	2.34719	2.54418	2.49857	2.59021	2.65112	2.45401	2.57997	1/1.5<=FC<=1.5	0.787	-0.345	4.2e-05	Non-Target	NO	NO	NO	NO	NO	NO	NO	1816	1816	0.397	0.397	0.397
AT1G10155	F4I2R3	PP2-A10	ATPP2-A10, PP2-A10	phloem protein 2-A10	0.984461	1.46944	1.42265	1.32999	1.41989	1.24103	1.29218	1.3303	N.S.	1.055	0.078	0.82942	0.441727	0.0975676	0.385083	0.120052	0.203661	0.491171	0.308126	0.271628	N.S.	0.931	-0.102	0.54973	N.A.	NO	NO	NO	NO	NO	NO	NO	2367	2367	0.402	0.402	0.402
AT1G10170	A0A1P8AVY4, A0A1P8AVZ2, Q9SY59	NFXL1	ATNFXL1, NFXL1	NF-X-like 1	5.32997	5.65596	5.73348	5.47937	5.83629	5.53522	5.57314	5.61696	N.S.	1.074	0.103	0.70964	2.60523	2.66901	2.92965	3.26974	3.47384	3.63661	2.73463	3.46007	1/1.5<=FC<=1.5	1.494	0.579	1.5e-12	Non-Target	NO	NO	NO	3UTR	3UTR	NO	NO	3974, 4031, 4052, 4208	4208	0.464, 0.465, 0.468, 0.466	0.468	0.466
AT1G10180	Q9SY60	AT1G10180	EXO84C	LOW protein: exocyst complex component-like protein	2.09261	1.47525	1.76447	1.98124	2.07533	1.57662	1.77745	1.87773	N.S.	1.133	0.181	0.56603	2.42378	2.44816	2.72627	2.78676	2.8461	2.88377	2.53274	2.83888	1/1.5<=FC<=1.5	1.151	0.203	1.5e-05	PERMISSIVE	NO	YES	NO	3UTR	NO	NO	NO	2640	2640	0.439	0.439	0.439
AT1G10190	Q8VYE1	AT1G10190		NEP-interacting protein, putative (DUF239)	0	0	0	0	0	0.0863786	0	0.0287929	N.A.	N.A.	N.A.	N.A.	N.E.	N.E.	N.E.	N.E.	N.E.	N.E.	N.E.	N.E.	N.E.	N.E.	N.E.	N.E.	N.A.	NO	NO	NO	NO	NO	NO	NO	1311	1311	0.393	0.393	0.393
AT1G10200	A0A1P8AT46, Q94JX5	WLIM1	AtWLIM1, WLIM1	GATA type zinc finger transcription factor family protein	5.65808	5.69559	5.76259	5.90294	5.82224	5.87237	5.70542	5.86585	N.S.	1.223	0.29	0.10934	4.32157	4.23752	4.35556	4.27891	4.14744	4.19935	4.30488	4.20857	N.S.	0.952	-0.071	0.36629	N.A.	3UTR,3UTR	NO	NO	NO	3UTR	CDS, 3UTR	NO	1236, 1427	1427	0.36, 0.369	0.369	0.364
AT1G10210	Q39021	MPK1	ATMPK1, MPK1	mitogen-activated protein kinase 1	2.29517	2.40737	2.36453	2.5126	2.43009	2.53359	2.35569	2.49209	N.S.	1.2	0.263	0.27356	1.65254	1.46193	1.77276	1.90385	1.75149	1.36416	1.62908	1.67317	N.S.	1.012	0.017	0.91107	Non-Target	NO	NO	NO	NO	NO	NO	NO	1509, 1768, 1876	1876	0.411, 0.428, 0.402	0.428	0.414
AT1G10220	F4I498, F4I499	AT1G10220		ZCF37	0.769202	0.669545	0.843836	0.865111	0.593128	0.750426	0.760861	0.736222	N.S.	1.011	0.016	0.96825	1.2776	1.1874	1.09431	0.673088	0.651598	0.882745	1.18643	0.73581	1/1.5<=FC<=1.5	0.687	-0.542	0.00017	Non-Target	NO	NO	NO	NO	NO	NO	NO	1167, 1180	1180	0.368, 0.369	0.369	0.368
AT1G10225	A0A178WIG4, Q56YG0, Q9SY64	AT1G10225		transmembrane protein	0	0.272563	0	0	0	0	0.0908543	0	N.A.	N.A.	N.A.	N.A.	0.391725	0	0	0	0	0	0.130575	0	N.A.	N.A.	N.A.	N.A.	N.A.	NO	NO	NO	NO	NO	NO	NO	535	535	0.443	0.443	0.443
AT1G10230	A0A178VZR0, Q9SY65	SK18	ASK18, SK18	E3 ubiquitin ligase SCF complex subunit SKP1/ASK1 family protein	2.10289	2.12082	2.42249	3.28976	2.99284	2.74148	2.2154	3.00803	UP	2.269	1.182	0.00137	4.03467	3.80565	3.56363	3.99967	3.89063	4.07181	3.80132	3.98737	N.S.	1.013	0.019	0.90077	Non-Target	NO	NO	NO	NO	NO	NO	NO	477	477	0.461	0.461	0.461
AT1G10240	Q9SY66	FRS11	FRS11	FAR1-related sequence 11	1.21237	1.27126	1.4466	1.21794	1.20371	1.1577	1.31008	1.19311	N.S.	0.929	-0.106	0.74661	1.46591	1.32397	1.3442	1.55446	1.43616	1.25834	1.37802	1.41632	N.S.	1.098	0.135	0.05246	Non-Target	NO	NO	NO	3UTR	NO	NO	NO	2363, 2833	2833	0.417, 0.435	0.435	0.426
AT1G10270	Q9SY69	GRP23	GRP23	glutamine-rich protein 23	0.693724	0.439279	0.474258	1.02024	1.03287	0.99171	0.535754	1.01494	UP	2.292	1.197	0.00117	2.21368	2.26388	2.22733	2.56642	3.06442	3.32006	2.23496	2.98363	UP	1.99	0.992	1.4e-12	Non-Target	NO	NO	NO	NO	NO	NO	NO	3062	3062	0.476	0.476	0.476
AT1G10280	A0A178WB92, Q9SY70	AT1G10280		Core-2/I-branching beta-1,6-N-acetylglucosaminyltransferase family protein	1.79226	1.61412	1.48949	1.38314	1.14682	1.32849	1.63196	1.28615	N.S.	0.743	-0.429	0.14335	1.72608	1.88758	1.8085	1.90748	1.89261	1.90291	1.80739	1.901	N.S.	0.996	-0.006	0.94938	Non-Target	NO	NO	NO	NO	NO	NO	NO	1927	1927	0.414	0.414	0.414
AT1G10290	C0Z3G3, Q9SE83	ADL6	ADL6, DRP2A	dynamin-like protein 6	4.07211	3.90735	3.74315	3.48537	3.57546	3.51666	3.90754	3.52583	1/1.5<=FC<=1.5	0.738	-0.439	0.01316	3.37113	3.24512	3.58364	3.36474	3.69502	3.85645	3.39997	3.63874	N.S.	1.076	0.105	0.24202	PERMISSIVE	NO	YES	YES	3UTR	3UTR	3UTR	Stop codon	3460	3460	0.453	0.453	0.453
AT1G10300	A0A178WKW8, A0A1P8AV84, F4I4A6	AT1G10300	Nog1-2	Nucleolar GTP-binding protein	0.428018	0.322138	0	0.449892	0.358598	0.320176	0.250052	0.376222	N.A.	N.A.	N.A.	N.A.	0.398075	0.278225	0.621241	0.784311	1.1662	0.761349	0.432514	0.903954	UP	2.631	1.396	< 2e-16	Non-Target	NO	NO	NO	NO	NO	NO	NO	2064, 2083, 2097	2097	0.415, 0.413, 0.414	0.415	0.414
AT1G10310	Q9SY73	AT1G10310		NAD(P)-binding Rossmann-fold superfamily protein	2.42729	1.98724	2.31531	2.08379	2.17077	2.1617	2.24328	2.13875	N.S.	0.945	-0.081	0.79754	2.75628	2.70427	2.86095	2.70933	2.58576	2.61414	2.77383	2.63641	N.S.	0.926	-0.11	0.13657	PERMISSIVE	NO	YES	YES	NO	3UTR	3UTR	Stop codon	1144	1144	0.422	0.422	0.422
AT1G10320	A0A178WGA5, A0A178WI65, A0A1P8AVS1, Q9SY74	AT1G10320		Zinc finger C-x8-C-x5-C-x3-H type family protein	0.760488	0.959356	1.02835	1.42601	1.38186	1.13262	0.916065	1.3135	UP	1.697	0.763	0.02864	0.371458	0.281483	0.638292	0.506213	1.13193	0.900317	0.430411	0.846154	UP	1.815	0.86	0.0001	Non-Target	NO	NO	NO	NO	NO	NO	TSS	2274, 2296	2296	0.44, 0.442	0.442	0.441
AT1G10330	Q9SY75	AT1G10330		Tetratricopeptide repeat (TPR)-like superfamily protein	0.554443	0.0841444	0.295411	0.350993	0.0709476	0	0.311333	0.140647	N.A.	N.A.	N.A.	N.A.	1.08092	1.17495	0.990202	1.168	1.24156	0.993712	1.08202	1.13442	N.S.	0.979	-0.03	0.82335	Non-Target	NO	NO	NO	NO	NO	NO	NO	1552	1552	0.412	0.412	0.412
AT1G10340	F4I4B0, Q9SY76	AT1G10340		Ankyrin repeat family protein	0.128765	0.130332	0.323561	0.0799787	0.103531	0.0575602	0.19422	0.0803566	N.A.	N.A.	N.A.	N.A.	0.490884	0.850971	0.973946	1.08955	1.07773	0.931801	0.771934	1.03303	N.S.	0.989	-0.016	0.92933	Non-Target	NO	NO	NO	NO	NO	NO	NO	1921, 2042	2042	0.44, 0.434	0.44	0.437
AT1G10350	Q9SY77	AT1G10350		DNAJ heat shock family protein	3.09681	3.03573	3.08764	3.20842	3.0259	3.06843	3.07339	3.10092	N.S.	1.088	0.122	0.57992	3.09487	3.07114	3.23879	3.13084	3.07628	3.12271	3.13493	3.10995	1/1.5<=FC<=1.5	0.913	-0.131	0.00076	Non-Target	NO	NO	NO	NO	NO	NO	NO	2023	2023	0.427	0.427	0.427
AT1G10360	A0A178WKB5, Q9FUS9	GSTU18	ATGSTU18, GST29, GSTU18	glutathione S-transferase TAU 18	1.65581	1.41403	1.83616	2.06242	2.00109	2.19173	1.63533	2.08508	UP	1.585	0.665	0.03944	1.78375	1.95849	2.06534	1.83001	1.76967	1.84696	1.93586	1.81555	1/1.5<=FC<=1.5	0.685	-0.545	0.01267	Non-Target	NO	NO	NO	NO	3UTR	NO	NO	1018	1018	0.441	0.441	0.441
AT1G10370	Q9FUS8	ERD9	ATGSTU17, ERD9, GST30, GST30B, GSTU17	Glutathione S-transferase family protein	3.63261	3.90389	3.83889	4.4046	4.12283	3.90611	3.7918	4.14451	1/1.5<=FC<=1.5	1.446	0.532	0.03624	4.57827	4.64432	4.43995	4.67928	4.67066	4.61723	4.55418	4.65573	N.S.	0.937	-0.093	0.52928	Non-Target	NO	NO	NO	3UTR	3UTR	NO	NO	1160	1160	0.434	0.434	0.434
AT1G10380	A0A178W312, A0A178W9U7, A0A1P8ATZ8, Q93ZB0	AT1G10380		Putative membrane lipoprotein	3.36146	3.16971	3.40984	3.7542	3.40526	3.45107	3.31367	3.53685	N.S.	1.297	0.375	0.10133	3.26822	3.2495	3.24896	3.46024	3.51593	3.6641	3.25556	3.54676	N.S.	1.037	0.053	0.65943	Non-Target	NO	NO	NO	NO	NO	NO	NO	1374, 1515	1515	0.418, 0.434	0.434	0.426
AT1G10385	F4I4B6	AT1G10385		Vps51/Vps67 family (components of vesicular transport) protein	0.36137	0.534476	0.328606	0.374829	0.310191	0.70174	0.408151	0.462253	N.S.	1.096	0.133	0.69088	0.168204	0.193064	0.327599	0.304206	0.400335	0.464857	0.229622	0.389799	1/1.5<=FC<=1.5	1.272	0.347	0.02301	N.A.	NO	NO	NO	NO	NO	NO	NO	2421	2421	0.451	0.451	0.451
AT1G10390	Q8RY25	AT1G10390	DRA2	Nucleoporin autopeptidase	2.96058	2.76157	2.99002	3.09095	3.07582	2.99372	2.90406	3.0535	N.S.	1.215	0.281	0.15051	2.66528	2.68179	2.78232	2.87646	3.36298	3.63929	2.7098	3.29291	UP	1.54	0.623	1.9e-09	Non-Target	NO	NO	NO	NO	3UTR	3UTR	Stop codon	3666, 3776, 3875	3875	0.469, 0.47, 0.473	0.473	0.471
AT1G10400	Q9SY84	AT1G10400		UDP-Glycosyltransferase superfamily protein	1.60174	1.00741	0.585552	1.32394	0.927754	0.781458	1.0649	1.01105	N.S.	0.967	-0.048	0.89615	1.7052	1.75593	1.98702	2.15092	2.27533	2.3336	1.81605	2.25328	1/1.5<=FC<=1.5	1.306	0.385	0.04371	Non-Target	NO	NO	NO	NO	NO	NO	NO	1566	1566	0.456	0.456	0.456
AT1G10410	Q8LPT2	AT1G10410		CW14 protein (DUF1336)	3.4013	3.23353	3.39462	3.51867	3.42937	3.42532	3.34315	3.45779	N.S.	1.177	0.235	0.21389	3.14252	3.07157	3.40204	3.28996	3.29711	3.35379	3.20538	3.31362	N.S.	1.079	0.109	0.21062	PERMISSIVE	NO	YES	NO	CDS, StopCodon	NO	NO	Stop codon	2297	2297	0.385	0.385	0.385
AT1G10417	A0A178WM10, A0A1P8ASU1, A0A1P8ASU2, A0A1P8ASY5, F4I4C1, Q9XIK7	AT1G10417		RUN/FYVE domain protein	0.335962	0.378199	0.382223	0.860556	0.582974	0.724951	0.365461	0.722827	UP	1.907	0.931	0.04761	0.227057	0.193996	0.269686	0.417373	0.373447	0.432663	0.230246	0.407828	N.S.	1.225	0.293	0.11701	N.A.	NO	NO	NO	NO	NO	NO	NO	1643, 1705, 1970, 2023	2023	0.374, 0.386, 0.373	0.386	0.38
AT1G10430	Q07098	PP2A-2	PP2A-2	protein phosphatase 2A-2	3.74598	3.42016	3.2355	3.48705	3.30497	3.25927	3.46721	3.35043	N.S.	0.947	-0.078	0.7733	3.74365	3.65484	3.81698	3.75199	3.7732	3.79239	3.73849	3.77253	1/1.5<=FC<=1.5	0.895	-0.161	1e-05	PERMISSIVE	NO	YES	YES	3UTR	3UTR	NO	NO	1335, 1347	1347	0.426, 0.433	0.433	0.43
AT1G10450	A0A384LLL4, Q9XIK6	SNL6	SNL6	paired amphipathic helix Sin3-like protein	1.1255	0.63666	0.910967	0.756505	1.05164	0.819842	0.891042	0.875997	N.S.	1.01	0.014	0.97031	1.30908	1.1947	1.47849	1.68326	1.84322	1.84939	1.32742	1.79196	1/1.5<=FC<=1.5	1.391	0.476	1.5e-07	Non-Target	NO	NO	NO	NO	NO	3UTR	NO	3522, 4040, 4126	4126	0.409, 0.408	0.409	0.409
AT1G10460	P92998	GLP7	GLP7	germin-like protein 7	1.25476	0.606083	0.596977	0.522702	0.476881	0.426995	0.819274	0.475526	N.S.	0.733	-0.448	0.21481	1.52578	1.17835	1.51626	1.4173	1.4085	1.44853	1.4068	1.42478	1/1.5<=FC<=1.5	0.844	-0.245	0.02228	Non-Target	NO	NO	NO	NO	NO	NO	NO	1330	1330	0.392	0.392	0.392
AT1G10470	A0A1P8ASD9, A0A1P8ASI6, O82798	ARR4	ARR4, ATRR1, IBC7, MEE7	response regulator 4	3.63605	3.31107	3.32601	2.96862	2.9241	3.08104	3.42438	2.99125	1/1.5<=FC<=1.5	0.703	-0.509	0.01492	4.4226	4.55805	4.53318	4.53895	4.47838	4.40022	4.50461	4.47252	1/1.5<=FC<=1.5	0.816	-0.294	1.3e-06	Non-Target	NO	NO	NO	5UTR	NO	NO	NO	1193, 1357, 2017	2017	0.363, 0.411, 0.41	0.411	0.395
AT1G10480	Q39264	ZFP5	ZFP5	zinc finger protein 5	2.65261	3.30298	3.61977	2.15822	2.24112	2.44352	3.19178	2.28095	DOWN	0.41	-1.286	0.00048	2.33858	2.28551	2.12856	2.18148	2.18065	1.87061	2.25089	2.07758	N.S.	0.865	-0.208	0.11227	Non-Target	NO	NO	NO	NO	NO	NO	NO	1536	1536	0.369	0.369	0.369
AT1G10490	Q9XIK4	AT1G10490		GNAT acetyltransferase (DUF699)	1.33287	0.739132	0.940205	0.445124	0.299477	0.502548	1.00407	0.415716	DOWN	0.353	-1.504	0.00044	1.9637	1.84167	2.16645	1.92691	2.24491	2.20163	1.9906	2.12448	N.S.	1.085	0.118	0.07138	PERMISSIVE	NO	YES	YES	NO	NO	NO	3' UTR	3148, 3885	3885	0.408, 0.422	0.422	0.415
AT1G10500	Q0WW99, Q9XIK3	CPISCA	ATCPISCA, CPISCA, SUFA1	chloroplast-localized ISCA-like protein	3.91466	4.01417	4.03393	3.76777	4.08011	4.05176	3.98759	3.96654	N.S.	1.041	0.058	0.84221	3.52562	3.42756	3.6292	3.48189	3.43709	3.16133	3.52746	3.3601	1/1.5<=FC<=1.5	0.893	-0.163	0.01151	N.A.	3UTR	NO	NO	NO	3UTR	3UTR	Stop codon	848	848	0.39	0.39	0.39
AT1G10510	Q93ZV8	emb2004	emb2004	RNI-like superfamily protein	1.85771	1.96093	1.8904	1.93151	1.93649	1.84072	1.90301	1.9029	N.S.	1.055	0.078	0.79003	2.09347	2.05284	2.1399	2.1243	2.24723	2.37661	2.0954	2.24938	N.S.	1.041	0.058	0.45441	PERMISSIVE	NO	NO	YES	NO	NO	3UTR	Stop codon	2150	2150	0.423	0.423	0.423
AT1G10520	A0A1P8APE6, Q9FNY4	Pol{lambda}	AtPol{lambda}, Pol{lambda}	DNA polymerase lambda (POLL)	0.622599	0.363812	0.356948	0.555903	0.207986	0.0604015	0.447786	0.274763	N.A.	N.A.	N.A.	N.A.	0.605674	0.327272	0.560561	0.778714	0.743827	0.657155	0.497836	0.726565	1/1.5<=FC<=1.5	1.244	0.315	0.02621	Non-Target	NO	NO	NO	NO	NO	NO	NO	1835, 1935	1935	0.434, 0.428	0.434	0.431
AT1G10522	Q9XIK0	PRIN2	PRIN2	Serine/Threonine-kinase	2.98756	3.28973	3.21742	3.39128	3.09594	3.09469	3.1649	3.19397	N.S.	1.075	0.104	0.72363	2.31083	2.30775	2.17871	2.23413	2.28965	2.23877	2.26576	2.25418	N.S.	0.877	-0.189	0.09366	PERMISSIVE	NO	YES	YES	NO	3UTR	3UTR	Stop codon	991, 1104	1104	0.442, 0.403	0.442	0.422
AT1G10530	Q7XJ59, Q9XIJ9	AT1G10530		D-ribose-binding periplasmic protein	2.28811	1.99537	2.08023	2.2179	2.56516	1.98617	2.12124	2.25641	N.S.	1.183	0.242	0.43898	3.2602	2.96931	2.89824	3.13785	2.95626	2.63683	3.04258	2.91031	N.S.	1.002	0.002	0.98608	Non-Target	NO	NO	NO	NO	NO	NO	NO	998	998	0.427	0.427	0.427
AT1G10540	A0A1P8AP19, Q8VZQ5	NAT8	ATNAT8, NAT8	nucleobase-ascorbate transporter 8	0	0.0628208	0.0413588	0.0746816	0	0	0.0347265	0.0248939	N.A.	N.A.	N.A.	N.A.	0.0973	0.106642	0.074302	0.115663	0.180749	0.102119	0.092748	0.132843	N.A.	N.A.	N.A.	N.A.	N.A.	NO	NO	NO	NO	NO	NO	NO	2052, 2056	2056	0.411, 0.409	0.411	0.41
AT1G10550	Q8LC45	XTH33	XET, XTH33	xyloglucan:xyloglucosyl transferase 33	1.42012	1.12779	1.33713	0.928586	0.899982	1.47348	1.29501	1.10068	N.S.	0.915	-0.129	0.71369	1.12742	1.02155	1.26461	1.31298	1.20242	1.66153	1.13786	1.39231	N.S.	0.969	-0.045	0.77682	Non-Target	NO	NO	NO	NO	NO	NO	NO	1208	1208	0.425	0.425	0.425
AT1G10560	Q9XIJ5	PUB18	ATPUB18, PUB18	plant U-box 18	2.67706	3.28826	3.19843	1.99867	2.40147	2.47344	3.05458	2.2912	DOWN	0.504	-0.989	0.0022	2.0881	1.72024	1.91284	1.76942	1.70952	1.63255	1.90706	1.70383	1/1.5<=FC<=1.5	0.797	-0.328	0.00083	Non-Target	NO	NO	NO	NO	NO	NO	NO	2567	2567	0.444	0.444	0.444
AT1G10570	A0A178W2X8, A0A178W4P0, A0A384LH87, Q8RWN0, Q8RWN0-2	OTS2	OTS2, ULP1C	Cysteine proteinases superfamily protein	2.06941	1.8884	1.61739	1.93567	1.92121	1.68087	1.8584	1.84592	N.S.	1.035	0.05	0.88045	1.46827	1.28064	1.51351	1.55861	1.66202	1.68447	1.42081	1.63503	N.S.	1.16	0.214	0.08449	Non-Target	NO	NO	NO	NO	NO	3UTR	NO	1957, 2141, 2337	2337	0.398, 0.395, 0.41	0.41	0.401
AT1G10580	A0A178W6N8, A4FVN8, Q9XIJ3	AT1G10580		Transducin/WD40 repeat-like superfamily protein	3.0055	2.73644	2.95499	2.88853	2.80088	2.71623	2.89898	2.80188	N.S.	0.964	-0.052	0.83738	2.71503	2.76053	2.89407	2.74748	2.95635	3.25066	2.78988	2.98483	N.S.	1.096	0.132	0.13726	PERMISSIVE	NO	YES	YES	NO	3UTR	3UTR	3' UTR	2193	2193	0.449	0.449	0.449
AT1G10585	A0A1P8ANB9, F4I4E1, Q949Q6	AT1G10585		basic helix-loop-helix (bHLH) DNA-binding superfamily protein	0	0	0.147733	0	0	0	0.0492442	0	N.A.	N.A.	N.A.	N.A.	0	0	0.0449791	0	0	0	0.014993	0	N.A.	N.A.	N.A.	N.A.	N.A.	NO	NO	NO	NO	NO	NO	NO	654, 1031	1031	0.368, 0.355	0.368	0.362
AT1G10586	B3H4W4, Q9XIJ1	AT1G10586		basic helix-loop-helix (bHLH) DNA-binding superfamily protein	0	0	0	0.142649	0	0.196788	0	0.113146	N.A.	N.A.	N.A.	N.A.	N.E.	N.E.	N.E.	N.E.	N.E.	N.E.	N.E.	N.E.	N.E.	N.E.	N.E.	N.E.	N.A.	NO	NO	NO	NO	NO	3UTR	NO	628, 771	771	0.35, 0.37	0.37	0.36
AT1G10588	Q1G2Y4, Q1G361	AT1G10588		Gibberellin-regulated family protein	0.109167	0	0	0	0	0	0.0363891	0	N.A.	N.A.	N.A.	N.A.	N.E.	N.E.	N.E.	N.E.	N.E.	N.E.	N.E.	N.E.	N.E.	N.E.	N.E.	N.E.	N.A.	NO	NO	NO	NO	NO	NO	NO	596, 647	647	0.354, 0.359	0.359	0.356
AT1G10590	Q93W05, Q9XIJ0	AT1G10590		Nucleic acid-binding, OB-fold-like protein	5.61518	5.39185	5.35807	4.98176	5.10859	5.05169	5.45503	5.04735	1/1.5<=FC<=1.5	0.725	-0.465	0.00558	5.75734	5.76968	5.62493	5.5161	5.38224	5.25638	5.71732	5.38491	1/1.5<=FC<=1.5	0.676	-0.564	4.1e-14	STRINGENT	3UTR,3UTR,3UTR	YES	YES	NO	3UTR	3UTR	3' UTR	816, 835, 940	940	0.414, 0.412	0.414	0.413
AT1G10600	Q6NKP9, Q6NKP9-2, Q6NKP9-3	AMSH2	AMSH2	associated molecule with the SH3 domain of STAM 2	1.34884	1.35559	1.29263	1.19727	1.23753	1.10194	1.33235	1.17891	N.S.	0.921	-0.119	0.73097	1.88093	1.88282	1.97202	1.91865	1.97263	1.85685	1.91192	1.91604	N.S.	0.934	-0.098	0.36766	PERMISSIVE	NO	YES	NO	3UTR	NO	NO	NO	845, 1042, 1119, 1244	1244	0.447, 0.424, 0.405, 0.42	0.447	0.424
AT1G10610	A0A1P8ARJ8, A0A1P8ARK0, Q0WNR2	AT1G10610		basic helix-loop-helix (bHLH) DNA-binding superfamily protein	0.43706	0.409084	0.575691	0.436424	0.579759	0.504633	0.473945	0.506938	N.A.	N.A.	N.A.	N.A.	0.221412	0.395044	0.71404	0.584802	0.675759	0.650462	0.443499	0.637008	N.S.	1.011	0.016	0.92847	Non-Target	NO	NO	NO	NO	NO	NO	NO	1369, 1587, 1857	1857	0.415, 0.402, 0.408	0.415	0.408
AT1G10620	Q9SGY7	PERK11	AtPERK11, PERK11	Protein kinase superfamily protein	0	0	0	0.0308696	0	0	0	0.0102899	N.A.	N.A.	N.A.	N.A.	0	0	0	0	0.0142687	0	0	0.00475624	N.A.	N.A.	N.A.	N.A.	N.A.	NO	NO	NO	NO	NO	NO	NO	2503	2503	0.453	0.453	0.453
AT1G10630	Q6ID97	ARFA1F	ARFA1F, ATARFA1F	ADP-ribosylation factor A1F	6.02336	5.82448	5.6793	5.41161	5.30836	5.37683	5.84238	5.3656	1/1.5<=FC<=1.5	0.675	-0.566	0.00062	5.35536	5.28332	5.2466	5.20586	5.19847	5.22047	5.29509	5.20827	1/1.5<=FC<=1.5	0.85	-0.235	0.01278	STRINGENT	3UTR,3UTR	YES	YES	NO	3UTR	3UTR	Stop codon	1194, 1303	1303	0.403, 0.406	0.406	0.404
AT1G10640	A0A178WFE4, Q94BV8	AT1G10640		Pectin lyase-like superfamily protein	0.667292	0.223193	0.11522	0.0720937	0.0994969	0.051835	0.335235	0.0744752	N.A.	N.A.	N.A.	N.A.	0.918856	0.725919	0.656844	0.425683	0.473868	0.522874	0.767206	0.474142	N.S.	0.774	-0.37	0.05534	Non-Target	NO	NO	NO	NO	NO	NO	NO	2123	2123	0.424	0.424	0.424
AT1G10650	B3H4E5, Q84JF9	AT1G10650		SBP (S-ribonuclease binding protein) family protein	2.95245	2.91954	3.05657	2.87272	3.0733	3.05575	2.97619	3.00059	N.S.	1.079	0.109	0.66684	2.39676	2.13157	2.2437	2.27176	2.24902	2.35592	2.25734	2.29223	N.S.	1.043	0.061	0.43121	Non-Target	NO	NO	NO	NO	NO	NO	NO	1609, 1736	1736	0.381, 0.389	0.389	0.385
AT1G10657	B3H6Q0, B3H715, Q0WR17, Q1G3V6	AT1G10657		transmembrane protein	0.106318	0	0	0.0766267	0	0	0.0354392	0.0255422	N.A.	N.A.	N.A.	N.A.	0.0892756	0.193025	0.0901651	0.139834	0.0874723	0.317631	0.124155	0.181646	N.A.	N.A.	N.A.	N.A.	Non-Target	NO	NO	NO	NO	NO	NO	NO	1074, 1081, 1217, 1289	1289	0.358, 0.364, 0.357, 0.365	0.365	0.361
AT1G10660	Q8H101	AT1G10660		transmembrane protein	2.07845	2.0003	2.16126	1.92263	1.68069	1.69478	2.08001	1.76603	N.S.	0.788	-0.344	0.20078	2.26302	2.39204	2.57929	2.50028	2.5767	2.4173	2.41145	2.49809	N.S.	0.945	-0.082	0.52646	Non-Target	NO	NO	NO	3UTR	NO	NO	NO	1621, 1631, 1774, 1848	1848	0.402, 0.407, 0.406	0.407	0.404
AT1G10670	F4I5V8, Q9SGY2	ACLA-1	ACLA-1	ATP-citrate lyase A-1	5.69631	5.61538	5.54385	5.43393	5.50497	5.41463	5.61851	5.45118	N.S.	0.909	-0.138	0.44128	5.83404	5.83197	5.86912	6.02075	6.02842	5.99478	5.84504	6.01465	N.S.	0.968	-0.047	0.72387	STRINGENT	3UTR,3UTR,3UTR,3UTR	YES	YES	NO	3UTR	3UTR	Stop codon	1687, 1724, 1760, 1771	1771	0.405, 0.416, 0.407, 0.424	0.424	0.413
AT1G10680	A0A1P8AMY2, Q9SGY1	PGP10	ABCB10, PGP10	P-glycoprotein 10	0.0677512	0.064447	0.0423341	0.0764757	0	0.0550467	0.0581774	0.0438408	N.A.	N.A.	N.A.	N.A.	0.0517733	0.0166142	0.0734382	0.0620429	0.0278029	0.0519101	0.0472752	0.047252	N.A.	N.A.	N.A.	N.A.	N.A.	NO	NO	NO	NO	NO	NO	NO	3865, 3956	3956	0.456, 0.453	0.456	0.454
AT1G10690	Q9SAD3	AT1G10690	SMR8	cyclin-dependent kinase inhibitor	2.94827	3.07145	3.18585	3.27299	3.41489	3.3544	3.06852	3.34743	N.S.	1.347	0.43	0.07558	1.18558	1.20156	1.19519	1.33961	1.42212	1.66425	1.19411	1.47533	N.S.	1.084	0.116	0.23474	Non-Target	NO	NO	NO	NO	NO	NO	NO	929	929	0.408	0.408	0.408
AT1G10700	A0A1P8ANQ1, Q93Z66	PRS3	PRS3	phosphoribosyl pyrophosphate (PRPP) synthase 3	3.76181	3.59396	3.64479	3.54769	3.59225	3.61728	3.66686	3.58574	N.S.	0.983	-0.025	0.91372	2.914	2.8631	3.06745	2.99215	2.87559	3.03885	2.94818	2.96886	N.S.	0.97	-0.044	0.61026	Non-Target	NO	NO	NO	3UTR	NO	NO	NO	1559, 1703	1703	0.423, 0.431	0.431	0.427
AT1G10710	Q45GQ7, Q45GQ7-2, Q45GQ7-3	PHS1	PHS1	poor homologous synapsis 1	0.18692	0	0.0769379	0.0707529	0	0	0.0879527	0.0235843	N.A.	N.A.	N.A.	N.A.	0.0519718	0.0490139	0.0663906	0	0	0	0.0557921	0	N.A.	N.A.	N.A.	N.A.	N.A.	NO	NO	NO	NO	NO	NO	NO	1154, 1413	1413	0.414, 0.407	0.414	0.41
AT1G10717	A8MQA5	AT1G10717	ESF1.3	EMBRYO SURROUNDING FACTOR-like protein	0	0	0	0.414274	0	0	0	0.138091	N.A.	N.A.	N.A.	N.A.	N.E.	N.E.	N.E.	N.E.	N.E.	N.E.	N.E.	N.E.	N.E.	N.E.	N.E.	N.E.	N.A.	NO	NO	NO	NO	NO	NO	NO	273	273	0.407	0.407	0.407
AT1G10720	Q9SAD0	AT1G10720		BSD domain-containing protein	3.30177	3.06691	3.01155	3.0184	2.82745	2.93103	3.12674	2.92563	N.S.	0.879	-0.186	0.39658	2.39612	2.26098	2.41711	2.4219	2.44382	2.42843	2.35807	2.43138	N.S.	1.016	0.024	0.81917	Non-Target	NO	NO	NO	NO	NO	NO	NO	1817	1817	0.397	0.397	0.397
AT1G10730	Q9SAC9	AT1G10730	AP1M1	Clathrin adaptor complexes medium subunit family protein	1.86987	1.46506	1.70936	1.84249	1.45419	1.27414	1.68143	1.52361	N.S.	0.931	-0.103	0.76447	1.65987	1.54054	1.83279	1.8781	1.81503	1.79212	1.67773	1.82842	N.S.	1.154	0.206	0.08782	Non-Target	NO	NO	NO	NO	NO	NO	NO	1820	1820	0.415	0.415	0.415
AT1G10740	F4I5X3, Q9SAC8	AT1G10740		alpha/beta-Hydrolases superfamily protein	3.65451	3.61427	3.46157	3.39757	3.34046	3.34205	3.57679	3.36003	N.S.	0.866	-0.208	0.27462	2.87932	2.99985	3.15552	3.10369	3.11871	3.16923	3.01157	3.13055	1/1.5<=FC<=1.5	0.855	-0.225	0.00162	Non-Target	NO	NO	NO	NO	3UTR	3UTR	NO	1874, 1882, 2067, 2240	2240	0.42, 0.409, 0.416	0.42	0.416
AT1G10745	A8MQX3	AT1G10745	ESF1.2	maternally expressed family protein	0	0	0	0	0.345857	0	0	0.115286	N.A.	N.A.	N.A.	N.A.	N.E.	N.E.	N.E.	N.E.	N.E.	N.E.	N.E.	N.E.	N.E.	N.E.	N.E.	N.E.	N.A.	NO	NO	NO	NO	NO	NO	NO	392	392	0.355	0.355	0.355
AT1G10750	A0A1P8AT45, Q84JS7	AT1G10750		carboxyl-terminal peptidase, putative (DUF239)	0.697879	0.328012	0.32153	0.770423	0.321347	0.362683	0.44914	0.484818	N.S.	1.06	0.084	0.80519	1.27026	1.1003	1.30891	1.42564	1.33233	0.927043	1.22649	1.22834	N.S.	0.982	-0.027	0.84917	Non-Target	NO	NO	NO	NO	NO	NO	NO	1370, 2056	2056	0.396, 0.412	0.412	0.404
AT1G10760	Q9SAC6	SEX1	GWD, GWD1, SEX1, SOP, SOP1	Pyruvate phosphate dikinase, PEP/pyruvate binding domain-containing protein	1.12773	0.72203	0.850238	0.976659	0.834451	0.966369	0.9	0.925826	N.S.	1.062	0.087	0.79631	1.55979	1.60336	2.05116	1.80286	2.34277	2.44042	1.7381	2.19535	1/1.5<=FC<=1.5	1.435	0.521	3.9e-07	PERMISSIVE	NO	YES	NO	NO	3UTR	3UTR	Stop codon	4670, 4825, 5040	5040	0.426, 0.434, 0.428	0.434	0.429
AT1G10770	Q9SAC5	AT1G10770		Plant invertase/pectin methylesterase inhibitor superfamily protein	0.96389	0.142677	0	0.244085	0.121138	0	0.368856	0.121741	N.S.	0.908	-0.139	0.40238	0.374018	0.682014	0.841019	0.917683	0.97783	1.14484	0.632351	1.01345	UP	1.726	0.787	6.9e-07	Non-Target	NO	NO	NO	NO	NO	NO	NO	948	948	0.397	0.397	0.397
AT1G10780	A0A1P8AQ68, Q9SAC4	AT1G10780		F-box/RNI-like superfamily protein	0.967445	0.95969	0.488754	0.624702	0.460507	0.466772	0.805296	0.517327	N.S.	0.782	-0.354	0.31038	1.94753	1.99871	2.06342	1.87199	2.12668	2.27957	2.00322	2.09275	N.S.	0.949	-0.076	0.59447	Non-Target	NO	NO	NO	NO	NO	NO	NO	1560, 1679	1679	0.423, 0.42	0.423	0.422
AT1G10790	Q9S701	AT1G10790		hydroxyproline-rich glycoprotein family protein	0.243189	0.120587	0.155122	0.20759	0.194765	0.103757	0.172966	0.168704	N.A.	N.A.	N.A.	N.A.	1.13859	1.32174	1.20906	1.29569	1.183	1.39572	1.22313	1.29147	N.S.	1.134	0.182	0.2428	Non-Target	NO	NO	NO	NO	NO	NO	NO	1107	1107	0.435	0.435	0.435
AT1G10800	Q9SAC3, Q9SGX2	AT1G10800		voltage-gated hydrogen channel-like protein	0.965993	0.670093	1.18203	1.19785	0.495998	0.835414	0.939372	0.843087	N.S.	0.982	-0.026	0.94145	1.26491	1.26285	1.21291	1.09739	1.09793	0.977661	1.24689	1.05766	1/1.5<=FC<=1.5	0.815	-0.295	0.00893	Non-Target	NO	NO	NO	NO	NO	NO	NO	789, 817	817	0.406, 0.412	0.412	0.409
AT1G10810	A0A1P8AWD7, A0A384KIU9, Q9C5B9	AT1G10810		NAD(P)-linked oxidoreductase superfamily protein	3.56082	3.42439	3.11387	2.49022	2.52464	2.79867	3.36636	2.60451	DOWN	0.503	-0.991	5.5e-05	2.21437	2.18235	2.13833	1.79277	1.96565	1.9079	2.17835	1.88878	1/1.5<=FC<=1.5	0.682	-0.552	1.2e-05	Non-Target	NO	NO	NO	NO	NO	NO	NO	1441, 1444, 1453	1453	0.42, 0.427	0.427	0.425
AT1G10820	A0A178WJ19, A0A178WJ64, A0A178WJD8, A0A178WLD3, Q8GX21	AT1G10820		hypothetical protein (DUF3755)	1.98899	1.76066	1.47298	2.23053	1.75987	1.85773	1.74088	1.94938	N.S.	1.26	0.333	0.27935	1.76957	1.64994	2.01098	2.04699	2.09449	2.31355	1.81016	2.15167	1/1.5<=FC<=1.5	1.197	0.259	1.9e-06	Non-Target	NO	NO	NO	3UTR	NO	NO	NO	1547, 1607	1607	0.415, 0.411	0.415	0.413
AT1G10830	A0A1P8AWQ2, Q9SAC0, Q9SAC0-2	Z-ISO	Z-ISO, Z-ISO1.1, Z-ISO1.2	15-cis-zeta-carotene isomerase	2.39374	2.4628	2.60262	2.6432	2.89016	2.61637	2.48639	2.71658	N.S.	1.297	0.375	0.14493	1.91824	1.89003	1.99671	2.16425	2.07487	2.16585	1.93499	2.13499	N.S.	0.961	-0.057	0.48858	PERMISSIVE	NO	YES	NO	NO	NO	3UTR	NO	1417, 1459, 1631	1631	0.422, 0.413, 0.427	0.427	0.421
AT1G10840	Q9C5Z2, Q9C5Z2-2	TIF3H1	TIF3H1	translation initiation factor 3 subunit H1	4.44757	4.17428	4.04232	3.98414	3.94981	3.84613	4.22139	3.92669	N.S.	0.806	-0.311	0.11573	4.54567	4.47081	4.68845	4.52245	4.51026	4.57399	4.56831	4.53557	1/1.5<=FC<=1.5	0.875	-0.193	4e-08	STRINGENT	3UTR,3UTR	YES	YES	3UTR	3UTR	3UTR, CDS	Stop codon	1471, 1585	1585	0.408, 0.411	0.411	0.41
AT1G10850	Q0WM66, Q940B9	AT1G10850		Leucine-rich repeat protein kinase family protein	2.11474	1.81468	1.44225	1.83008	1.62271	1.50088	1.79056	1.65122	N.S.	0.914	-0.13	0.68153	2.51656	2.56896	2.60984	2.64241	2.85961	2.73806	2.56512	2.74669	N.S.	0.986	-0.02	0.88182	Non-Target	NO	NO	NO	NO	3UTR	NO	NO	3000	3000	0.439	0.439	0.439
AT1G10865	B3H4R5, Q8GWM1	AT1G10865		cytochrome C oxidase assembly factor	3.76183	3.65865	3.83911	3.86659	4.01409	4.00361	3.7532	3.96143	N.S.	1.271	0.346	0.11698	4.30263	4.23837	4.22603	4.30616	4.14811	4.01215	4.25568	4.15547	1/1.5<=FC<=1.5	0.869	-0.203	0.00139	STRINGENT	3UTR,3UTR	YES	NO	NO	3UTR	NO	NO	564, 691	691	0.394, 0.41	0.41	0.402
AT1G10870	A0A1P8AMD8, Q9SMX5	AGD4	AGD4	ARF-GAP domain 4	3.07326	2.83711	2.7414	2.74012	2.57355	2.35816	2.88393	2.55728	N.S.	0.788	-0.344	0.1327	2.02493	1.80945	2.08547	1.9929	2.11505	1.96506	1.97328	2.02434	N.S.	1.06	0.085	0.39258	PERMISSIVE	NO	YES	NO	NO	NO	CDS	3' UTR	2817, 2832	2832	0.408	0.408	0.408
AT1G10875	A0A1P8AME6	AT1G10875		core-2/I-branching beta-1,6-N-acetylglucosaminyltransferase family protein	0	0	0	0	0	0.113131	0	0.0377104	N.A.	N.A.	N.A.	N.A.	N.E.	N.E.	N.E.	N.E.	N.E.	N.E.	N.E.	N.E.	N.E.	N.E.	N.E.	N.E.	N.A.	NO	NO	NO	NO	NO	NO	NO	1023	1023	0.372	0.372	0.372
AT1G10880	Q0WR07	AT1G10880		core-2/I-branching beta-1,6-n-acetylglucosaminyltransferase family protein	0.0426552	0	0	0	0	0.0843025	0.0142184	0.0281008	N.A.	N.A.	N.A.	N.A.	0	0	0.0148187	0.0408454	0	0	0.00493955	0.0136151	N.A.	N.A.	N.A.	N.A.	N.A.	NO	NO	NO	NO	NO	NO	NO	1341	1341	0.465	0.465	0.465
AT1G10890	A0A178W3Y9, A0A1P8AUZ4, A0A1P8AV05, P0CB26, Q0WNB4	AT1G10890		arginine/glutamate-rich 1 protein	3.10798	3.28999	3.29737	3.79794	3.72236	3.53847	3.23178	3.68626	UP	1.625	0.7	0.00145	1.90398	1.71248	1.94788	2.18794	2.44454	2.25146	1.85478	2.29465	1/1.5<=FC<=1.5	1.294	0.372	0.00085	Non-Target	NO	NO	NO	NO	NO	NO	CDS	843, 1339, 2106, 2240	2240	0.426, 0.396, 0.397, 0.452	0.452	0.418
AT1G10900	Q9SUI2	AT1G10900		Phosphatidylinositol-4-phosphate 5-kinase family protein	2.96508	2.7811	2.88795	2.67205	2.47173	2.73905	2.87804	2.62761	N.S.	0.841	-0.25	0.24105	2.96165	2.78583	2.98718	3.08679	2.98308	3.04566	2.91155	3.03851	N.S.	1.009	0.013	0.87327	PERMISSIVE	NO	YES	YES	3UTR	NO	NO	NO	2855, 2880, 3363	3363	0.404, 0.393, 0.403	0.404	0.4
AT1G10910	A0A178WA25, A0A1P8AN66, Q0WVV0	EMB3103	EMB3103, PDM2	Pentatricopeptide repeat (PPR) superfamily protein	1.18486	0.84663	0.984756	1.12722	1.23974	1.0714	1.00541	1.14612	N.S.	1.194	0.255	0.42524	1.01173	0.981775	1.2555	1.26158	1.35205	1.3593	1.083	1.32431	1/1.5<=FC<=1.5	1.167	0.222	0.02919	Non-Target	NO	NO	NO	3UTR	NO	3UTR	NO	2281, 2430	2430	0.399, 0.405	0.405	0.402
AT1G10920	A0A1P8AT99, O04093	LOV1	LOV1	NB-ARC domain-containing disease resistance protein	0.0194653	0.0455879	0	0.0542306	0.110653	0.0829901	0.0216844	0.0826245	N.A.	N.A.	N.A.	N.A.	0.115472	0.0970169	0.107334	0.126094	0.078814	0.069472	0.106608	0.09146	N.A.	N.A.	N.A.	N.A.	Non-Target	NO	NO	NO	NO	NO	NO	NO	2798, 2990, 3237, 3355, 3505	3505	0.399, 0.406, 0.409	0.409	0.404
AT1G10930	Q8L840	RECQ4A	ATRECQ4A, ATSGS1, RECQ4A	DNA helicase (RECQl4A)	0.933826	0.493247	0.508407	0.475586	0.800014	0.517317	0.64516	0.597639	N.S.	0.972	-0.04	0.91564	0.793172	0.53863	0.882917	0.915642	1.10922	1.08038	0.738239	1.03508	1/1.5<=FC<=1.5	1.39	0.475	3.9e-05	Non-Target	NO	NO	NO	NO	NO	NO	NO	4029	4029	0.418	0.418	0.418
AT1G10940	F4I7B6, P43291	SNRK2.4	ASK1, SNRK2-4, SNRK2.4, SRK2A	Protein kinase superfamily protein	4.03907	3.94367	3.99889	4.09108	3.89908	3.9059	3.99388	3.96535	N.S.	1.035	0.049	0.83001	3.08712	3.08507	3.28036	3.25816	3.3592	3.39467	3.15085	3.33734	1/1.5<=FC<=1.5	1.116	0.158	0.00984	Non-Target	NO	NO	NO	3UTR	NO	3UTR	Stop codon	1791, 1911	1911	0.394, 0.409	0.409	0.401
AT1G10950	A0A178WKJ8, Q940G0	TMN1	AtTMN1, EMP12, TMN1	transmembrane nine 1	4.98554	4.60903	4.40209	4.45516	4.28891	4.26199	4.66555	4.33535	N.S.	0.782	-0.355	0.11101	4.48218	4.55245	4.68704	4.65791	4.81891	4.90911	4.57389	4.79531	N.S.	1.047	0.066	0.53773	STRINGENT	3UTR	YES	YES	NO	3UTR	3UTR	Stop codon, 3' UTR	2530	2530	0.421	0.421	0.421
AT1G10960	O04090	FD1	ATFD1, FD1	ferredoxin 1	3.1246	3.23055	2.61424	3.97488	3.96042	3.68054	2.9898	3.87195	UP	2.458	1.297	2.6e-06	5.46571	5.50317	5.23814	5.73771	5.66962	5.52714	5.40234	5.64483	N.S.	1.08	0.111	0.51567	Non-Target	NO	NO	NO	NO	NO	5UTR	NO	854	854	0.459	0.459	0.459
AT1G10970	A0A178WA23, O04089	ZIP4	ATZIP4, ZIP4	zinc transporter	0.993491	0.941111	0.801029	0.780053	0.875128	0.610096	0.911877	0.755092	N.S.	0.9	-0.152	0.66201	2.28879	2.36612	2.42192	2.84804	3.18892	2.9778	2.35895	3.00492	1/1.5<=FC<=1.5	1.267	0.342	0.00259	Non-Target	NO	NO	NO	NO	NO	NO	NO	1125, 1647	1647	0.454, 0.484	0.484	0.469
AT1G10980	O04088	AT1G10980		Lung seven transmembrane receptor family protein	0.0555047	0	0.0431352	0	0	0	0.03288	0	N.A.	N.A.	N.A.	N.A.	N.E.	N.E.	N.E.	N.E.	N.E.	N.E.	N.E.	N.E.	N.E.	N.E.	N.E.	N.E.	N.A.	NO	NO	NO	NO	NO	NO	NO	1972	1972	0.416	0.416	0.416
AT1G10990	A0A178WP78, O23694, Q3EDE7	AT1G10990		transmembrane protein	2.17354	1.69412	1.52874	2.22182	1.96735	2.32201	1.7988	2.1704	N.S.	1.396	0.481	0.14572	1.59186	1.73023	1.89275	2.41951	2.18816	2.19574	1.73828	2.2678	1/1.5<=FC<=1.5	1.216	0.282	0.02295	Non-Target	NO	NO	NO	NO	NO	NO	NO	871, 949	949	0.405, 0.396	0.405	0.4
AT1G11000	A0A178W7Y9, A0A178W801, A0A178W9Y7, A0A1P8APG9, O23693	MLO4	ATMLO4, MLO4	Seven transmembrane MLO family protein	3.76083	3.65175	3.24105	2.67339	2.75265	2.84693	3.55121	2.75766	DOWN	0.48	-1.059	4.9e-06	2.52531	2.35803	2.51815	2.24914	2.27477	2.05682	2.46716	2.19358	1/1.5<=FC<=1.5	0.86	-0.218	0.04333	Non-Target	NO	NO	NO	NO	NO	NO	NO	2030, 2046, 2114	2114	0.41, 0.413, 0.418	0.418	0.414
AT1G11020	Q8GYT4	AT1G11020		RING/FYVE/PHD zinc finger superfamily protein	3.16266	3.26085	3.19276	2.50076	2.75933	2.79977	3.20543	2.68662	DOWN	0.653	-0.614	0.0084	2.89762	2.91051	2.82251	2.9632	2.81715	2.74135	2.87688	2.84057	1/1.5<=FC<=1.5	0.788	-0.343	1.9e-08	Non-Target	NO	NO	NO	3UTR	NO	NO	NO	1460	1460	0.419	0.419	0.419
AT1G11040	O04087	AT1G11040		HSP40/DnaJ peptide-binding protein	0.033634	0.0779522	0.0515188	0	0	0.066761	0.0543683	0.0222537	N.A.	N.A.	N.A.	N.A.	0.021509	0	0	0	0.0226867	0	0.00716967	0.00756223	N.A.	N.A.	N.A.	N.A.	N.A.	NO	NO	NO	NO	NO	NO	NO	1669	1669	0.436	0.436	0.436
AT1G11050	O04086	AT1G11050		Protein kinase superfamily protein	1.36812	1.06812	1.20467	1.26001	1.14114	1.25605	1.21364	1.21907	N.S.	1.043	0.061	0.86004	1.43007	1.49098	1.57419	1.5931	1.71663	1.89456	1.49841	1.73476	N.S.	1.09	0.125	0.28403	Non-Target	NO	NO	NO	NO	NO	NO	NO	2282	2282	0.429	0.429	0.429
AT1G11060	F4I7C7, O04085	AT1G11060	AtWAPL1, WAPL1	WAPL (Wings apart-like protein regulation of heterochromatin) protein	2.42463	2.27604	2.31079	2.44113	2.07448	2.16456	2.33715	2.22672	N.S.	0.964	-0.053	0.84953	1.71085	1.53296	1.81202	1.69911	1.95867	2.08917	1.68528	1.91565	1/1.5<=FC<=1.5	1.108	0.147	0.03913	Non-Target	NO	NO	NO	NO	NO	NO	3' UTR	3148	3148	0.422	0.422	0.422
AT1G11070	A0A1P8AV53, A0A1P8AV78, A0A1P8AV93, F4I7C8	AT1G11070		hydroxyproline-rich glycoprotein family protein	0.0473014	0.0898672	0.0301169	0.0875877	0	0	0.0557618	0.0291959	N.A.	N.A.	N.A.	N.A.	0.0604354	0.0936442	0.244425	0.252671	0.183969	0.283864	0.132835	0.240168	N.A.	N.A.	N.A.	N.A.	N.A.	NO	NO	NO	NO	NO	NO	NO	2432, 2777, 3184, 3294, 3375	3375	0.426, 0.411, 0.409, 0.431	0.431	0.417
AT1G11080	F4I7C9, O04084	scpl31	scpl31	serine carboxypeptidase-like 31	0.0335266	0	0	0.097016	0.340725	0.243149	0.0111755	0.226963	N.A.	N.A.	N.A.	N.A.	1.28588	1.49787	1.60371	2.44014	2.51732	2.41368	1.46248	2.45704	UP	2.985	1.578	1.7e-15	Non-Target	NO	NO	NO	NO	NO	NO	NO	1674, 2322	2322	0.386, 0.424	0.424	0.405
AT1G11090	O04083	AT1G11090	MAGL1	alpha/beta-Hydrolases superfamily protein	1.87447	1.81061	1.34361	1.70801	1.59489	1.76211	1.67623	1.68834	N.S.	1.036	0.052	0.88835	2.87847	2.78539	2.80405	2.89005	2.91103	3.09465	2.82264	2.96524	N.S.	0.92	-0.12	0.10132	Non-Target	NO	NO	NO	NO	NO	NO	NO	1172	1172	0.433	0.433	0.433
AT1G11100	A0A1P8AM17, A0A1P8AM22, F4I7D2, F4I7D3	AT1G11100	FRG5	SNF2 domain-containing protein / helicase domain-containing protein / zinc finger protein-like protein	2.10691	2.18919	2.34536	2.59831	2.63641	2.72117	2.21382	2.65196	UP	1.635	0.709	0.00117	0.533038	0.405698	0.530973	0.62919	0.879488	0.806467	0.489903	0.771715	1/1.5<=FC<=1.5	1.369	0.453	0.00279	Non-Target	NO	NO	NO	NO	NO	CDS, 5UTR	NO	3262, 3982, 4072, 4097, 4125	4125	0.424, 0.425, 0.429, 0.431	0.431	0.428
AT1G11110	A0A1P8AS54, A0A1P8ASB0, F4I7D4	AT1G11110		LisH and RanBPM domains containing protein	0	0	0	0	0	0.0932708	0	0.0310903	N.A.	N.A.	N.A.	N.A.	N.E.	N.E.	N.E.	N.E.	N.E.	N.E.	N.E.	N.E.	N.E.	N.E.	N.E.	N.E.	N.A.	NO	NO	NO	NO	NO	NO	NO	1221, 1231, 1300	1300	0.412, 0.41, 0.406	0.412	0.409
AT1G11112	Q1G3V5	AT1G11112		hypothetical protein	0	0	0	0.112788	0	0.1566	0	0.0897962	N.A.	N.A.	N.A.	N.A.	0.172142	0.0568018	0.101453	0.0709495	0.122127	0.31214	0.110132	0.168406	N.A.	N.A.	N.A.	N.A.	Non-Target	NO	NO	NO	NO	NO	NO	NO	765	765	0.354	0.354	0.354
AT1G11120	A0A178WFU1, F4I7D6, F4I7D7	AT1G11120		CTTNBP 2 amino-terminal-like protein	1.01846	0.971635	0.979993	1.44193	0.694552	0.928046	0.99003	1.02151	N.S.	1.085	0.118	0.73701	1.82158	1.92933	1.86197	1.90755	1.94593	2.06969	1.87096	1.97439	N.S.	0.889	-0.17	0.12568	Non-Target	NO	NO	NO	NO	NO	NO	NO	609, 970	970	0.418, 0.438	0.438	0.428
AT1G11125	A0A178WA10	AT1G11125		hypothetical protein	0.301665	0.112484	0	0.133488	0.0951629	0.0966992	0.13805	0.10845	N.A.	N.A.	N.A.	N.A.	1.44847	1.36996	1.36237	1.7433	1.48605	1.27876	1.3936	1.5027	N.S.	1.073	0.102	0.35655	Non-Target	NO	NO	NO	NO	NO	NO	NO	1181	1181	0.434	0.434	0.434
AT1G11130	A0A1P8ARR6, Q8RWZ1	SUB	SCM, SRF9, SUB	Leucine-rich repeat protein kinase family protein	0.255924	0.0990242	0.13157	0.0603432	0.0834759	0.0848465	0.162173	0.0762219	N.A.	N.A.	N.A.	N.A.	1.34851	1.22836	1.56693	1.25238	1.38978	1.68407	1.38127	1.44208	1/1.5<=FC<=1.5	1.493	0.579	0.00032	PERMISSIVE	NO	YES	YES	3UTR	NO	NO	NO	2522, 3006	3006	0.422, 0.431	0.431	0.426
AT1G11160	A0A1P8AW58, A0A1P8AW68, A0A1P8AW69, F4I7E1	AT1G11160	KTN80.1	Transducin/WD40 repeat-like superfamily protein	1.79644	1.87445	1.98519	1.77046	1.57716	1.79101	1.88536	1.71288	N.S.	0.891	-0.167	0.52916	0.827828	0.776748	1.01094	0.975208	1.04805	1.31548	0.871838	1.11292	1/1.5<=FC<=1.5	1.288	0.365	0.00222	Non-Target	NO	NO	NO	NO	NO	NO	NO	3869, 3901, 3993, 4087	4087	0.415, 0.413, 0.411, 0.416	0.416	0.414
AT1G11170	A0A1P8AR12, A0A1P8AR15, A0A1P8AR16, F4I7E3, Q8S9J5	AT1G11170		lysine ketoglutarate reductase trans-splicing-like protein (DUF707)	1.38882	1.19564	1.30041	1.45411	1.60085	1.44053	1.29495	1.4985	N.S.	1.285	0.362	0.21947	0.731988	0.520738	0.711299	0.612641	0.769425	0.613366	0.654675	0.665144	N.S.	1.078	0.108	0.46901	Non-Target	NO	NO	NO	NO	NO	NO	NO	1300, 1577, 1773, 1846, 1864, 1937, 1966, 2190, 2254	2254	0.381, 0.385, 0.383, 0.369, 0.366, 0.378, 0.371	0.385	0.378
AT1G11180	A0A1P8ANB7, F4I7E4, Q9SXA5	SCAMP2	AtSCAMP2, SCAMP2	Secretory carrier membrane protein (SCAMP) family protein	1.10262	1.10655	1.4147	0.656609	0.431657	0.915579	1.20796	0.667949	N.S.	0.606	-0.723	0.08603	0.985312	1.19513	1.41379	1.49003	1.69529	1.68394	1.19808	1.62309	N.S.	1.078	0.108	0.43517	Non-Target	NO	NO	NO	NO	NO	3UTR	NO	1103, 1181, 1190	1190	0.424, 0.417, 0.413	0.424	0.418
AT1G11190	Q9SXA6	BFN1	BFN1, ENDO1	bifunctional nuclease i	2.73453	2.36255	2.44869	2.67388	2.85646	2.36931	2.51526	2.63322	N.S.	1.169	0.226	0.42546	1.87269	1.72411	1.93814	2.14941	1.87691	1.64133	1.84498	1.88922	N.S.	0.983	-0.025	0.8361	Non-Target	NO	NO	NO	NO	NO	NO	NO	1274	1274	0.389	0.389	0.389
AT1G11200	F4I7E7	AT1G11200		organic solute transporter ostalpha protein (DUF300)	3.5989	2.95728	2.69271	2.31991	2.0499	2.25032	3.08296	2.20671	DOWN	0.429	-1.221	0.00017	3.10174	3.12025	3.07953	2.86278	2.93196	2.85693	3.10051	2.88389	1/1.5<=FC<=1.5	0.724	-0.466	3.7e-08	PERMISSIVE	NO	YES	YES	NO	NO	NO	NO	1322	1322	0.399	0.399	0.399
AT1G11210	Q9SXA7	AT1G11210		cotton fiber protein, putative (DUF761)	1.98657	1.87152	1.78233	1.69824	1.92548	1.75539	1.88014	1.79304	N.S.	0.974	-0.038	0.91256	1.26308	1.41338	1.70204	1.4105	1.39526	1.35128	1.4595	1.38568	N.S.	1.184	0.244	0.10852	Non-Target	NO	NO	NO	NO	NO	NO	NO	1222	1222	0.439	0.439	0.439
AT1G11220	F4I7E9, Q9SXA8	AT1G11220		cotton fiber, putative (DUF761)	0.224256	0	0	0	0.197374	0	0.0747519	0.0657912	N.A.	N.A.	N.A.	N.A.	1.43235	1.42458	1.58043	1.31733	1.17498	1.23426	1.47912	1.24219	1/1.5<=FC<=1.5	0.848	-0.238	0.04095	Non-Target	NO	NO	NO	NO	NO	NO	NO	1093, 1389	1389	0.455, 0.436	0.455	0.446
AT1G11240	Q8W494	AT1G11240		ribosomal RNA-processing protein	1.99085	1.5039	1.62614	1.44769	1.58026	1.55461	1.70697	1.52752	N.S.	0.872	-0.198	0.49875	4.32403	4.3766	4.28343	4.22684	4.21587	4.19035	4.32802	4.21102	1/1.5<=FC<=1.5	0.894	-0.162	0.04461	PERMISSIVE	NO	YES	YES	NO	3UTR	3UTR	Stop codon	2372	2372	0.413	0.413	0.413
AT1G11250	Q9SXB0	125	ATSYP125, SYP125	syntaxin of plants 125	0	0	0.0584236	0	0	0	0.0194745	0	N.A.	N.A.	N.A.	N.A.	0.0718908	0.210323	0.0417579	0.188892	0.0510476	0	0.10799	0.07998	N.A.	N.A.	N.A.	N.A.	N.A.	NO	NO	NO	NO	NO	NO	NO	1496	1496	0.388	0.388	0.388
AT1G11260	P23586	STP1	ATSTP1, STP1	sugar transporter 1	4.98758	4.89125	4.77279	3.94366	3.65599	4.04686	4.88387	3.88217	DOWN	0.403	-1.311	3e-11	4.24609	4.35573	4.64564	4.34953	4.44477	4.63872	4.41582	4.47767	N.S.	0.876	-0.19	0.13832	Non-Target	NO	NO	NO	NO	NO	5UTR, CDS, 3UTR	NO	2483	2483	0.442	0.442	0.442
AT1G11270	A0A178WJI5, F4I7F7, Q7X7A9	AT1G11270		F-box and associated interaction domains-containing protein	1.57693	1.24776	1.23839	1.55282	1.0776	1.15474	1.35436	1.26172	N.S.	0.983	-0.025	0.9478	1.18167	1.05756	1.11995	1.08136	1.15601	0.770711	1.11972	1.00269	N.S.	0.963	-0.054	0.5644	Non-Target	NO	NO	NO	3UTR	NO	NO	NO	1272, 1470, 1522	1522	0.417, 0.427, 0.414	0.427	0.419
AT1G11280	A0A1P8AW73, F4I7F8, Q9SXB3, Q9SXB3-2, Q9SXB3-3	AT1G11280		S-locus lectin protein kinase family protein	1.93619	1.63996	1.57023	0.875442	1.06725	1.0628	1.71546	1.00183	DOWN	0.428	-1.224	3.5e-05	1.70077	1.55847	1.94194	1.63872	1.76462	1.72338	1.73373	1.70891	N.S.	0.914	-0.13	0.24721	Non-Target	NO	NO	NO	NO	NO	3UTR	NO	2663, 2804, 2828, 2838, 2915	2915	0.413, 0.409, 0.415, 0.411, 0.412	0.415	0.412
AT1G11290	Q3E6Q1	CRR22	CRR22	Pentatricopeptide repeat (PPR) superfamily protein	0.089774	0.201228	0.109701	0.0518873	0.071901	0	0.133567	0.0412628	N.A.	N.A.	N.A.	N.A.	0.444377	0.479471	0.606926	0.680768	0.689395	0.562279	0.510258	0.644147	1/1.5<=FC<=1.5	1.283	0.359	1.8e-05	Non-Target	NO	NO	NO	NO	NO	NO	NO	2921	2921	0.429	0.429	0.429
AT1G11300	A0A1P8ASF1, Q9SXB4	AT1G11300	EGM1	G-type lectin S-receptor-like Serine/Threonine-kinase	0.171851	0.0482491	0.120989	0.137736	0	0.041187	0.113697	0.0596409	N.A.	N.A.	N.A.	N.A.	0.202328	0.345072	0.312259	0.449888	0.701022	0.587907	0.286553	0.579606	N.S.	1.185	0.245	0.19286	Non-Target	NO	NO	NO	NO	NO	NO	NO	2648, 2770	2770	0.418, 0.421	0.421	0.42
AT1G11303	Q9SXB5	AT1G11303		G-type lectin S-receptor-like Serine/Threonine-kinase	0.0597527	0.0474569	0.147585	0.0286263	0	0.0405343	0.0849316	0.0230535	N.A.	N.A.	N.A.	N.A.	0	0.0233112	0.0212349	0.0723476	0.0131344	0	0.0148487	0.028494	N.A.	N.A.	N.A.	N.A.	Non-Target	NO	NO	NO	NO	NO	NO	NO	2697	2697	0.419	0.419	0.419
AT1G11310	A0A1P8AMJ7, B3H6R0, Q940N5, Q9SXB6	MLO2	ATMLO2, MLO2, PMR2	Seven transmembrane MLO family protein	4.50413	4.47679	4.40741	3.85293	3.79405	3.93897	4.46278	3.86198	DOWN	0.594	-0.752	3.1e-06	3.49152	3.54159	3.57474	3.64852	3.61553	3.56594	3.53595	3.60999	1/1.5<=FC<=1.5	0.909	-0.138	0.00525	PERMISSIVE	NO	YES	NO	3UTR	NO	3UTR	NO	1940, 2255, 2484	2484	0.406, 0.404, 0.4	0.406	0.403
AT1G11320	Q9SXB7	AT1G11320		GDSL esterase/lipase	0.666488	0.489654	0.740821	0.717682	0.803687	0.864719	0.632321	0.795363	N.S.	1.21	0.275	0.4266	1.24391	1.28857	1.0911	1.31256	1.4299	1.29938	1.20786	1.34728	N.S.	0.935	-0.097	0.27828	Non-Target	NO	NO	NO	NO	NO	NO	NO	1906	1906	0.406	0.406	0.406
AT1G11330	A0A1P8AMY7, F4I8U6, Q9SXB8	AT1G11330		S-locus lectin protein kinase family protein	0.0559228	0	0.163396	0.103195	0.40182	0.143906	0.0731063	0.216307	N.A.	N.A.	N.A.	N.A.	1.1179	1.29652	1.31171	1.20248	1.37819	1.49225	1.24204	1.35764	1/1.5<=FC<=1.5	1.291	0.368	0.00817	Non-Target	NO	NO	NO	NO	NO	NO	NO	2865, 3499, 3580	3580	0.395, 0.397, 0.404	0.404	0.399
AT1G11340	A0A178WL67, A0A1P8ATC6, A0A1P8ATF5, Q9ZT07	AT1G11340		G-type lectin S-receptor-like Serine/Threonine-kinase	0.0218818	0	0	0.0308832	0.0356876	0	0.00729395	0.0221902	N.A.	N.A.	N.A.	N.A.	N.E.	N.E.	N.E.	N.E.	N.E.	N.E.	N.E.	N.E.	N.E.	N.E.	N.E.	N.E.	Non-Target	NO	NO	NO	NO	NO	NO	NO	2502, 2966, 2993	2993	0.422, 0.421, 0.442	0.442	0.428
AT1G11350	Q9LPZ9	SD1-13	CBRLK1, RKS2, SD1-13	S-domain-1 13	0.217937	0.0851735	0	0.051742	0.138605	0.204433	0.101037	0.131593	N.A.	N.A.	N.A.	N.A.	0.161054	0.212476	0.208291	0.175425	0.487046	0.213105	0.193941	0.291859	N.A.	N.A.	N.A.	N.A.	Non-Target	NO	NO	NO	NO	NO	NO	NO	2929	2929	0.434	0.434	0.434
AT1G11360	C0Z2J1, Q93WN3	AT1G11360		Adenine nucleotide alpha hydrolases-like superfamily protein	3.59785	3.3224	3.3754	3.49993	3.38466	3.34552	3.43188	3.41004	N.S.	1.036	0.051	0.83593	3.51385	3.58459	3.62571	3.66832	3.75476	3.68963	3.57472	3.70424	1/1.5<=FC<=1.5	0.899	-0.153	0.00595	Non-Target	NO	NO	NO	3UTR	3UTR	3UTR	NO	1280, 1424, 1615, 1632	1632	0.423, 0.424, 0.425, 0.434	0.434	0.426
AT1G11362	Q1G3V3	AT1G11362		Plant invertase/pectin methylesterase inhibitor superfamily protein	0	0	0	0	0.164792	0	0	0.0549307	N.A.	N.A.	N.A.	N.A.	0	0	0.161871	0.0774359	0	0	0.0539568	0.025812	N.A.	N.A.	N.A.	N.A.	N.A.	NO	NO	NO	NO	NO	NO	NO	722	722	0.341	0.341	0.341
AT1G11380	Q8LFV5	AT1G11380		PLAC8 family protein	3.33205	3.43855	3.57046	3.29411	3.12856	3.26042	3.44702	3.2277	N.S.	0.867	-0.207	0.39024	3.31134	3.3286	3.45464	3.37143	3.30077	3.33662	3.36486	3.33627	1/1.5<=FC<=1.5	0.79	-0.339	1.1e-07	Non-Target	NO	NO	NO	NO	NO	NO	3' UTR	1438	1438	0.407	0.407	0.407
AT1G11390	F4I8V6, Q9LPZ6	AT1G11390		Protein kinase superfamily protein	2.96143	2.77749	2.81162	2.77446	2.84587	2.79801	2.85018	2.80611	N.S.	1.015	0.021	0.93191	2.78384	2.74608	2.85071	2.80702	2.80853	2.84258	2.79354	2.81938	N.S.	0.917	-0.125	0.12893	PERMISSIVE	NO	YES	YES	3UTR	NO	NO	NO	2576	2576	0.423	0.423	0.423
AT1G11400	Q9LPZ4	PYM	PYM	partner of Y14-MAGO	3.60564	3.77618	3.79378	3.67064	3.81459	3.8765	3.7252	3.78724	N.S.	1.109	0.149	0.55199	3.47118	3.34106	3.41184	3.35566	2.99484	3.10114	3.40803	3.15055	1/1.5<=FC<=1.5	0.731	-0.452	3.6e-05	PERMISSIVE	NO	YES	NO	NO	NO	3UTR	Stop codon	1044, 1055, 1436, 1566, 1598, 1611	1611	0.412, 0.41, 0.405, 0.419, 0.443, 0.434	0.443	0.42
AT1G11410	A0A1P8AMR1, A0A1P8AMR8, A0A1P8AMT2, Q9LPZ3	AT1G11410		S-locus lectin protein kinase family protein	0.59083	0.808653	0.923617	0.637373	0.988929	0.800493	0.774367	0.808932	N.S.	1.067	0.094	0.79729	0.211041	0.203995	0.279444	0.260299	0.536849	0.326075	0.231493	0.374408	N.S.	1.261	0.334	0.05159	Non-Target	NO	NO	NO	NO	NO	NO	NO	2719, 2742, 2932, 2936	2936	0.412, 0.416	0.416	0.414
AT1G11420	F4I8W1	DUF2	ATDUF2, DUF2	agenet domain protein (DOMAIN OF UNKNOWN FUNCTION 724 2)	0.054151	0	0	0	0.0537389	0	0.0180503	0.017913	N.A.	N.A.	N.A.	N.A.	1.16796	0.984152	1.07895	1.15189	1.06533	0.956705	1.07702	1.05797	N.S.	1.124	0.168	0.13218	Non-Target	NO	NO	NO	NO	NO	NO	NO	2019	2019	0.404	0.404	0.404
AT1G11430	Q9LPZ1	MORF9	MORF9, RIP9	plastid developmental protein DAG	2.716	2.69463	2.67844	2.50021	2.46561	2.46104	2.69636	2.47562	N.S.	0.868	-0.203	0.42574	3.7454	3.82001	3.77987	3.77261	3.77985	3.75474	3.78176	3.76906	1/1.5<=FC<=1.5	0.902	-0.149	0.01329	STRINGENT	3UTR	YES	NO	NO	CDS, 3UTR	3UTR	Stop codon	1038	1038	0.43	0.43	0.43
AT1G11440	Q9LPZ0	AT1G11440		hypothetical protein	1.46747	1.62694	1.25083	0.974295	0.638209	1.00828	1.44841	0.873596	DOWN	0.555	-0.848	0.02824	1.70936	1.5895	1.67878	1.64364	1.69866	1.35415	1.65921	1.56548	N.S.	0.971	-0.042	0.67005	Non-Target	NO	NO	NO	NO	NO	NO	NO	1535	1535	0.401	0.401	0.401
AT1G11450	A0A1P8AM13, A0A1P8AM19, Q500Z4, Q500Z4-2	UMAMIT27	UMAMIT27	nodulin MtN21 /EamA-like transporter family protein	1.78519	0.999241	1.49941	1.33457	0.891119	1.45403	1.42795	1.22657	N.S.	0.885	-0.177	0.60724	3.16795	3.23953	3.44926	3.40862	3.27973	3.29675	3.28558	3.32837	N.S.	1.079	0.11	0.31619	Non-Target	NO	NO	NO	NO	NO	NO	NO	1035, 1148, 1440, 1448, 1468	1468	0.387, 0.385, 0.383, 0.388	0.388	0.386
AT1G11460	F4I8W6	UMAMIT26	UMAMIT26	nodulin MtN21 /EamA-like transporter family protein	0.0451292	0	0.194185	0	0	0	0.0797714	0	N.A.	N.A.	N.A.	N.A.	1.79493	1.67709	1.82706	1.86253	1.7007	1.40519	1.76636	1.65614	N.S.	1.04	0.056	0.75277	Non-Target	NO	NO	NO	NO	NO	NO	NO	1274	1274	0.381	0.381	0.381
AT1G11470	F4I8W7	AT1G11470		Pentatricopeptide repeat (PPR) superfamily protein	0.159542	0	0.126136	0	0	0.160917	0.095226	0.0536389	N.A.	N.A.	N.A.	N.A.	N.E.	N.E.	N.E.	N.E.	N.E.	N.E.	N.E.	N.E.	N.E.	N.E.	N.E.	N.E.	N.A.	NO	NO	NO	NO	NO	NO	NO	747	747	0.428	0.428	0.428
AT1G11475	Q8LFJ6	NRPB10	NRPB10, NRPD10, NRPE10	RNA polymerases N / 8 kDa subunit	3.1358	2.60182	2.67731	2.16461	2.10074	2.31383	2.80498	2.19306	DOWN	0.596	-0.747	0.02053	4.59625	4.48958	4.50765	3.93042	3.78394	3.36252	4.53116	3.69229	DOWN	0.61	-0.713	1.2e-13	STRINGENT	3UTR	YES	YES	NO	3UTR	3UTR	Stop codon	606	606	0.388	0.388	0.388
AT1G11480	A8MR62, Q94C21	AT1G11480		eukaryotic translation initiation factor-like protein	4.08346	4.00724	4.06914	3.9254	3.9648	3.92459	4.05328	3.93826	N.S.	0.953	-0.07	0.72888	3.63895	3.60283	3.79748	3.97268	4.08682	4.11872	3.67975	4.05941	1/1.5<=FC<=1.5	1.086	0.119	0.00484	PERMISSIVE	NO	YES	NO	3UTR	3UTR	5UTR, 3UTR	Stop codon	2175, 2312	2312	0.452, 0.457	0.457	0.454
AT1G11490	A0A178W2J2, Q9LPY5	AT1G11490		zinc finger (C2H2 type) family protein	1.58762	1.27537	0.897601	0.410725	0.793378	0.594801	1.25353	0.599635	DOWN	0.447	-1.162	0.01903	1.03397	0.838983	1.05825	0.967721	0.97766	0.857496	0.977066	0.934292	N.S.	0.922	-0.118	0.45693	Non-Target	NO	NO	NO	NO	NO	NO	NO	1310, 1341	1341	0.401, 0.411	0.411	0.406
AT1G11500	A0A178W6W2, A0A1P8AQF2, A0A1P8AQF6, A2RVQ4	AT1G11500	DEAL3	transmembrane protein, putative (DUF1218)	0.478283	0.425412	0.175127	0	0.368569	0.221239	0.359607	0.196603	N.A.	N.A.	N.A.	N.A.	0.890703	0.474317	0.869242	0.703097	0.481919	0.275926	0.744754	0.486981	N.S.	0.856	-0.224	0.18919	Non-Target	NO	NO	NO	NO	NO	NO	NO	569, 841, 927	927	0.372, 0.386, 0.439	0.439	0.399
AT1G11520	A0A178WCH0, Q9LPY3	AT1G11520		pliceosome associated protein-like protein	0	0	0	0.153628	0	0	0	0.0512093	N.A.	N.A.	N.A.	N.A.	N.E.	N.E.	N.E.	N.E.	N.E.	N.E.	N.E.	N.E.	N.E.	N.E.	N.E.	N.E.	N.A.	NO	NO	NO	NO	NO	NO	NO	591	591	0.428	0.428	0.428
AT1G11530	Q8LDI5	CXXS1	ATCXXS1, CXXS1	C-terminal cysteine residue is changed to a serine 1	1.8302	1.53215	1.69171	1.32842	0.886601	1.413	1.68469	1.20934	N.S.	0.748	-0.418	0.24472	2.30283	2.78074	2.98113	2.84439	3.14186	3.0404	2.68823	3.00888	N.S.	1.017	0.025	0.88182	Non-Target	NO	NO	NO	NO	NO	3UTR, CDS	NO	652	652	0.373	0.373	0.373
AT1G11540	F4I8X6	AT1G11540		Sulfite exporter TauE/SafE family protein	2.32079	2.14237	1.7125	1.50022	1.15322	1.46153	2.05855	1.37166	DOWN	0.514	-0.959	0.00583	1.9709	2.13328	2.22798	2.17608	2.15091	2.50181	2.11072	2.27627	N.S.	1.07	0.098	0.40894	Non-Target	NO	NO	NO	NO	NO	NO	NO	1320, 1454	1454	0.453, 0.446	0.453	0.45
AT1G11545	Q8L9A9	XTH8	XTH8	xyloglucan endotransglucosylase/hydrolase 8	4.19986	3.46074	3.02365	3.585	3.37329	3.25135	3.56142	3.40321	N.S.	0.885	-0.177	0.58574	5.26328	5.21443	5.17937	4.97002	4.94964	4.89738	5.21903	4.93902	1/1.5<=FC<=1.5	0.756	-0.404	0.01537	Non-Target	NO	NO	NO	NO	NO	NO	NO	1217	1217	0.434	0.434	0.434
AT1G11560	F4I8X8	AT1G11560		Oligosaccharyltransferase complex/magnesium transporter family protein	0	0	0.0741664	0	0	0	0.0247221	0	N.A.	N.A.	N.A.	N.A.	0.032593	0.0306727	0.055236	0.0386898	0	0	0.0395006	0.0128966	N.A.	N.A.	N.A.	N.A.	N.A.	NO	NO	NO	NO	NO	NO	NO	1193	1193	0.422	0.422	0.422
AT1G11570	A0A178W6A0, A0A1P8AW76, A0A1P8AWA6, Q3E7U2	NTL	NTL	NTF2-like protein	0.433393	1.15577	0.159475	1.37835	1.0016	0.892284	0.582881	1.09074	N.S.	1.231	0.3	0.28016	1.91445	1.4713	1.47862	1.76171	1.67521	1.15786	1.62146	1.53159	N.S.	0.899	-0.153	0.26096	Non-Target	NO	NO	NO	NO	NO	NO	NO	530, 614, 652, 685	685	0.365, 0.366, 0.375, 0.381	0.381	0.372
AT1G11580	A0A1P8ARX5, Q1JPL7	PMEPCRA	ATPMEPCRA, PMEPCRA	methylesterase PCR A	4.93202	4.746	4.7174	5.70881	5.22392	5.16757	4.79847	5.36676	UP	1.849	0.886	0.00013	5.30031	5.27416	5.35854	5.63135	5.77131	5.92524	5.311	5.77597	1/1.5<=FC<=1.5	1.27	0.345	5.9e-08	PERMISSIVE	NO	NO	YES	NO	NO	NO	NO	1885, 1969	1969	0.442, 0.446	0.446	0.444
AT1G11590	Q84JX1	AT1G11590	PME19	Plant invertase/pectin methylesterase inhibitor superfamily	0.096662	0	0	0.0468702	0	0.0660489	0.0322207	0.0376397	N.A.	N.A.	N.A.	N.A.	0	0	0	0	0.0224169	0	0	0.00747228	N.A.	N.A.	N.A.	N.A.	N.A.	NO	NO	NO	NO	NO	NO	NO	1686	1686	0.426	0.426	0.426
AT1G11591	A0A1P8AM75, Q9LPX5	AT1G11591		hypothetical protein	1.72455	1.01075	1.19731	1.31233	0.816607	1.23354	1.31087	1.12083	N.S.	0.915	-0.128	0.7072	N.E.	N.E.	N.E.	N.E.	N.E.	N.E.	N.E.	N.E.	N.E.	N.E.	N.E.	N.E.	Non-Target	NO	NO	NO	NO	NO	NO	NO	636	636	0.407	0.407	0.407
AT1G11620	Q9SAB5	AT1G11620		F-box and associated interaction domains-containing protein	0	0	0.157407	0	0	0	0.052469	0	N.A.	N.A.	N.A.	N.A.	N.E.	N.E.	N.E.	N.E.	N.E.	N.E.	N.E.	N.E.	N.E.	N.E.	N.E.	N.E.	N.A.	NO	NO	NO	NO	NO	NO	NO	1092	1092	0.4	0.4	0.4
AT1G11630	Q9SAB4	AT1G11630		Tetratricopeptide repeat (TPR)-like superfamily protein	1.14077	1.11521	1.16652	1.42592	1.17703	1.16809	1.14084	1.25701	N.S.	1.177	0.235	0.46948	1.88847	1.80019	1.91608	2.03692	1.90052	2.10234	1.86824	2.01326	N.S.	1.058	0.081	0.2567	Non-Target	NO	NO	NO	NO	NO	NO	NO	1712	1712	0.404	0.404	0.404
AT1G11650	Q9SAB3, Q9SAB3-2, Q9SAB3-3	RBP45B	ATRBP45B, RBP45B	RNA-binding (RRM/RBD/RNP motifs) family protein	5.24209	5.20729	5.20328	5.40891	5.45817	5.35987	5.21755	5.40898	1/1.5<=FC<=1.5	1.268	0.342	0.03189	5.22096	5.26179	5.27431	5.55706	5.62266	5.74963	5.25235	5.64311	1/1.5<=FC<=1.5	1.129	0.175	0.03041	STRINGENT	3UTR,3UTR	YES	YES	NO	3UTR	3UTR, CDS	3' UTR	1575, 1641	1641	0.453, 0.449	0.453	0.451
AT1G11655	Q84VW6, Q9SAB2	AT1G11655		hypothetical protein	0.193313	0.407039	0.978737	0.981806	0.353132	0.829242	0.526363	0.721393	N.S.	1.069	0.096	0.70843	2.35065	2.33117	2.3814	1.93337	1.60708	1.09702	2.35441	1.54582	DOWN	0.511	-0.968	2.8e-09	Non-Target	NO	NO	NO	NO	NO	NO	NO	633	633	0.376	0.376	0.376
AT1G11660	A0A1P8AT01, Q9SAB1	AT1G11660	HSP70-16	heat shock protein 70 (Hsp 70) family protein	3.78118	3.80697	3.80763	3.6544	3.72435	3.74192	3.79859	3.70689	N.S.	0.973	-0.039	0.86458	2.90683	2.81957	3.03876	3.11857	3.18854	3.28183	2.92172	3.19631	1/1.5<=FC<=1.5	1.136	0.184	0.00255	PERMISSIVE	NO	YES	NO	NO	NO	NO	NO	2606, 2682, 2821, 2911	2911	0.415, 0.417, 0.408, 0.406	0.417	0.412
AT1G11670	Q9SAB0	AT1G11670		MATE efflux family protein	4.73436	4.75594	4.51905	3.75943	3.53089	4.03044	4.66978	3.77359	DOWN	0.456	-1.132	9.2e-07	3.78093	3.71844	4.18018	3.98088	3.96723	4.10325	3.89318	4.01712	N.S.	1.001	0.001	0.98279	PERMISSIVE	NO	YES	NO	NO	NO	NO	NO	2136	2136	0.413	0.413	0.413
AT1G11680	Q9SAA9	CYP51G1	atCYP51, CYP51, CYP51A2, CYP51G1, EMB1738	CYTOCHROME P450 51G1	4.69781	4.43233	4.21213	4.22334	4.01649	4.01716	4.44742	4.08566	N.S.	0.76	-0.396	0.05873	4.73717	4.79453	4.90049	4.8705	5.01882	5.11111	4.81073	5.00014	N.S.	0.948	-0.077	0.53789	PERMISSIVE	NO	YES	YES	NO	3UTR	3UTR	NO	2028	2028	0.42	0.42	0.42
AT1G11684	B3H4U7	AT1G11684		hypothetical protein	0.391021	0.987025	0.319402	0	0.38912	0	0.565816	0.129707	N.S.	0.932	-0.101	0.41943	0	0.271393	0.621799	0	0	0	0.297731	0	N.A.	N.A.	N.A.	N.A.	N.A.	NO	NO	NO	NO	NO	NO	NO	357	357	0.415	0.415	0.415
AT1G11690	Q9SAA8	AT1G11690		BRANCHLESS TRICHOME-like protein	0.419705	0.186551	0.126734	0.116527	0.159204	0.531708	0.24433	0.269146	N.A.	N.A.	N.A.	N.A.	0.2832	0.266479	0.105799	0.073976	0.127219	0	0.218492	0.0670651	N.A.	N.A.	N.A.	N.A.	N.A.	NO	NO	NO	NO	NO	NO	NO	744	744	0.409	0.409	0.409
AT1G11700	Q9SAA7	AT1G11700		senescence regulator (Protein of unknown function, DUF584)	1.69682	1.87388	1.68476	2.47882	2.10866	2.00685	1.75182	2.19811	UP	1.662	0.733	0.02001	2.67655	2.44481	2.46189	2.70377	2.5209	2.64341	2.52775	2.62269	N.S.	1.135	0.182	0.08275	Non-Target	NO	NO	NO	NO	NO	NO	NO	1174	1174	0.415	0.415	0.415
AT1G11710	A0A1P8AWU6, Q9SAA6	AT1G11710		Pentatricopeptide repeat (PPR) superfamily protein	0.102562	0.0499799	0.182359	0.0301644	0.0419698	0.122917	0.111634	0.0650172	N.A.	N.A.	N.A.	N.A.	0.752287	0.604961	0.708247	1.02174	1.01856	0.887916	0.688498	0.976073	UP	1.502	0.587	2.5e-06	Non-Target	NO	NO	NO	NO	NO	NO	NO	2559, 2646	2646	0.402, 0.401	0.402	0.402
AT1G11720	F4IAG1, F4IAG2	SS3	ATSS3, SS3	starch synthase 3	0.802675	0.585868	0.576094	0.53809	0.561088	0.663801	0.654879	0.58766	N.S.	0.946	-0.08	0.82505	0.416758	0.5333	0.687033	0.683989	0.814207	0.794204	0.545697	0.764133	1/1.5<=FC<=1.5	1.305	0.384	0.00208	PERMISSIVE	NO	YES	NO	3UTR	3UTR	3UTR	NO	3609, 3720	3720	0.416, 0.414	0.416	0.415
AT1G11730	A0A178WIH2, Q9SAA4	AT1G11730		Galactosyltransferase family protein	0.0330798	0	0.144913	0.0911324	0.064612	0.185357	0.0593309	0.1137	N.A.	N.A.	N.A.	N.A.	0.0709635	0.165001	0.152212	0.186013	0.0742908	0	0.129392	0.086768	N.A.	N.A.	N.A.	N.A.	Non-Target	NO	NO	NO	NO	NO	NO	NO	1695	1695	0.382	0.382	0.382
AT1G11740	F4IAG4, Q8GY14	AT1G11740		ankyrin repeat family protein	2.62218	2.3417	2.1773	3.19746	2.64295	2.88799	2.38039	2.90947	UP	1.79	0.84	0.00157	1.71341	1.57085	1.43231	1.52946	1.43181	1.17352	1.57219	1.37826	1/1.5<=FC<=1.5	0.711	-0.492	7.7e-07	Non-Target	NO	NO	NO	NO	NO	NO	NO	2224	2224	0.459	0.459	0.459
AT1G11750	F4IAG5, Q9SAA2	CLPP6	CLPP6, NCLPP1, NCLPP6	CLP protease proteolytic subunit 6	3.54096	3.25586	3.1299	3.19656	3.03355	3.01934	3.30891	3.08315	N.S.	0.861	-0.216	0.35707	3.23646	3.29135	3.46779	3.36213	3.41127	3.2159	3.33187	3.32977	1/1.5<=FC<=1.5	0.897	-0.157	0.0005	Non-Target	NO	NO	NO	NO	3UTR	3UTR	Stop codon	1268, 1338	1338	0.427, 0.425	0.427	0.426
AT1G11755	Q8H0V2	LEW1	LEW1	Undecaprenyl pyrophosphate synthetase family protein	1.67896	1.3974	1.50281	1.17429	1.29812	1.20856	1.52639	1.22699	N.S.	0.783	-0.352	0.26589	1.88746	1.67467	1.79791	1.64514	1.77131	1.51108	1.78668	1.64251	1/1.5<=FC<=1.5	0.827	-0.274	0.01531	Non-Target	NO	NO	NO	3UTR	3UTR	NO	NO	1402	1402	0.399	0.399	0.399
AT1G11760	Q84VW5	MED32	MED2, MED32	mediator of RNA polymerase II transcription subunit-like protein	2.3456	2.74025	2.63436	2.72088	2.87283	2.63435	2.5734	2.74269	N.S.	1.193	0.254	0.38942	2.45033	2.44758	2.55315	2.68994	2.61227	2.5711	2.48369	2.62444	N.S.	0.992	-0.011	0.89058	Non-Target	NO	NO	NO	NO	NO	NO	NO	901	901	0.414	0.414	0.414
AT1G11765	Q9SAA0	AT1G11765		Plant self-incompatibility protein S1 family	0.239918	0	0	0	0	0	0.0799727	0	N.A.	N.A.	N.A.	N.A.	N.E.	N.E.	N.E.	N.E.	N.E.	N.E.	N.E.	N.E.	N.E.	N.E.	N.E.	N.E.	N.A.	NO	NO	NO	NO	NO	NO	NO	721	721	0.341	0.341	0.341
AT1G11770	Q9SA99	AT1G11770	AtBBE2, OGOX3	FAD-binding Berberine family protein	0.126163	0	0	0	0.0643701	0	0.0420543	0.0214567	N.A.	N.A.	N.A.	N.A.	0	0	0.0172189	0	0	0	0.00573963	0	N.A.	N.A.	N.A.	N.A.	N.A.	NO	NO	NO	NO	NO	NO	NO	1701	1701	0.46	0.46	0.46
AT1G11780	Q9SA98	AT1G11780	ALKBH1A	oxidoreductase, 2OG-Fe(II) oxygenase family protein	2.26785	1.88395	1.78966	1.86164	1.71385	1.73851	1.98049	1.77133	N.S.	0.859	-0.22	0.44271	2.095	2.00881	2.13496	1.9775	1.91791	1.77099	2.07959	1.8888	1/1.5<=FC<=1.5	0.833	-0.264	0.00041	Non-Target	NO	NO	NO	3UTR	NO	NO	NO	1873	1873	0.408	0.408	0.408
AT1G11785	Q56YI8	AT1G11785		transmembrane protein	0	0	0	0.138632	0	0.191408	0	0.110013	N.A.	N.A.	N.A.	N.A.	0.128038	0	0	0	0.905794	0	0.0426793	0.301931	N.A.	N.A.	N.A.	N.A.	N.A.	NO	NO	NO	NO	NO	NO	NO	643	643	0.323	0.323	0.323
AT1G11790	Q9SA96, Q9SA96-2	ADT1	ADT1, AtADT1	arogenate dehydratase 1	3.32659	3.39168	3.19496	3.12895	3.26554	3.09659	3.30441	3.1637	N.S.	0.933	-0.101	0.67349	2.69163	2.55166	2.65734	2.22906	2.19765	2.11927	2.63354	2.18199	1/1.5<=FC<=1.5	0.741	-0.432	1.8e-06	PERMISSIVE	NO	YES	YES	NO	NO	NO	NO	1746, 1759	1759	0.409, 0.412	0.412	0.41
AT1G11800	A0A178WD42, Q9SA95	AT1G11800		endonuclease/exonuclease/phosphatase family protein	1.65903	1.50875	1.62339	0.985674	0.932594	1.27803	1.59706	1.06543	DOWN	0.588	-0.766	0.02236	1.94346	2.01128	2.21375	2.04623	2.06333	2.09469	2.05616	2.06808	1/1.5<=FC<=1.5	0.79	-0.34	2.8e-06	Non-Target	NO	NO	NO	NO	NO	NO	NO	1689	1689	0.426	0.426	0.426
AT1G11820	A0A1P8AWX9, F4IAH8, O65399	AT1G11820		O-Glycosyl hydrolases family 17 protein	1.40926	1.69619	2.0788	1.6017	2.25066	1.77692	1.72808	1.87643	N.S.	1.144	0.195	0.56689	2.31412	2.17847	2.46597	2.604	2.70476	2.68841	2.31952	2.66572	1/1.5<=FC<=1.5	1.221	0.288	4.4e-10	PERMISSIVE	NO	YES	NO	3UTR	3UTR	3UTR	NO	1572, 1714, 2033	2033	0.411, 0.41, 0.419	0.419	0.413
AT1G11840	O65398, O65398-2, O65398-3	GLX1	ATGLX1, AtGLYI3, GLX1	glyoxalase/bleomycin resistance protein/dioxygenase superfamily protein	5.28685	5.27417	5.29855	5.2363	5.15612	5.1608	5.28653	5.18441	N.S.	0.965	-0.052	0.80183	6.21631	6.26254	6.3533	6.38898	6.37407	6.36877	6.27738	6.37727	N.S.	0.922	-0.117	0.30611	STRINGENT	3UTR,3UTR,3UTR,3UTR,3UTR,3UTR	YES	YES	NO	3UTR	3UTR	coding_intron, Stop codon	1249, 1272, 1459, 1483, 1616, 1641	1641	0.418, 0.416, 0.423, 0.415, 0.421	0.423	0.419
AT1G11850	A8MQG0, A8MRA1, F4IAI7, O65397	AT1G11850		transmembrane protein	0	0	0	0.0974561	0	0	0	0.0324854	N.A.	N.A.	N.A.	N.A.	0.0502852	0.135232	0	0.217927	0.42633	0	0.061839	0.214752	N.A.	N.A.	N.A.	N.A.	Non-Target	NO	NO	NO	NO	NO	NO	NO	504, 582, 591, 868	868	0.422, 0.443, 0.401, 0.438	0.443	0.426
AT1G11860	A0A2H1ZEA9, O65396	AT1G11860		Glycine cleavage T-protein family	4.28422	3.86274	3.9299	4.23024	4.04519	3.91008	4.02562	4.06183	N.S.	1.088	0.122	0.61836	5.16255	5.12367	5.19929	5.2551	5.26841	5.28355	5.16184	5.26902	1/1.5<=FC<=1.5	0.843	-0.246	0.00033	STRINGENT	CDS,CDS,CDS,3UTR,3UTR,3UTR	YES	YES	NO	3UTR	3UTR, CDS, 5UTR	Stop codon	1582, 1754, 2009	2009	0.429, 0.426, 0.441	0.441	0.432
AT1G11870	A0A178W7G5, A0A1P8ASF6, A0A1P8ASH4, A0A1P8ASJ5, F4IAJ4, Q8RWT8, Q8RWT8-2	SRS	ATSRS, OVA7, SRS	Seryl-tRNA synthetase	1.85002	1.78198	1.66745	1.66418	1.56354	1.68123	1.76649	1.63632	N.S.	0.93	-0.105	0.71663	2.20271	2.16697	2.3815	2.18511	2.38002	2.51347	2.25039	2.35953	N.S.	0.948	-0.077	0.12412	PERMISSIVE	NO	YES	NO	NO	NO	NO	NO	1446, 1756, 1770, 1833, 1948, 2142	2142	0.44, 0.442, 0.438, 0.447, 0.429	0.447	0.44
AT1G11880	A0A1P8AMX4, A0A1P8AMX6, Q6NKT6	AT1G11880		transferases, transferring hexosyl groups	1.95348	1.69241	1.71233	1.36485	1.12344	1.60258	1.78607	1.36362	N.S.	0.705	-0.504	0.10008	1.22439	1.21551	1.33095	1.04114	1.48199	1.3835	1.25695	1.30221	N.S.	0.983	-0.025	0.79995	Non-Target	NO	NO	NO	NO	NO	NO	NO	1680, 1790, 1854	1854	0.412, 0.415	0.415	0.414
AT1G11890	Q94AU2	SEC22	ATSEC22, SEC22	Synaptobrevin family protein	4.72108	4.65096	4.40741	4.11156	4.11423	4.25442	4.59315	4.16007	1/1.5<=FC<=1.5	0.709	-0.496	0.00996	4.11526	4.05365	4.06125	3.88311	3.88237	3.80729	4.07672	3.85759	1/1.5<=FC<=1.5	0.849	-0.237	0.00208	STRINGENT	3UTR	YES	YES	NO	3UTR	3UTR	3' UTR	1095	1095	0.394	0.394	0.394
AT1G11900	A0A178W2A4, Q5BIV3	AT1G11900		Tetratricopeptide repeat (TPR)-like superfamily protein	0.864572	0.10989	0.72442	0.349191	0.460189	0.736928	0.566294	0.515436	N.S.	0.964	-0.054	0.86446	1.48845	1.2644	1.21108	1.24239	1.29924	1.31218	1.32131	1.2846	N.S.	0.888	-0.171	0.0618	Non-Target	NO	NO	NO	NO	NO	NO	NO	1207	1207	0.397	0.397	0.397
AT1G11905	F4IAJ8, Q8L702	AT1G11905		B-cell receptor-associated protein 31-like protein	3.1527	2.98364	2.94731	3.26818	2.89889	2.88061	3.02788	3.01589	N.S.	1.057	0.08	0.77952	3.67253	3.48124	3.52245	3.49068	3.43671	3.31843	3.55874	3.41527	1/1.5<=FC<=1.5	0.812	-0.3	0.00034	Non-Target	NO	NO	NO	NO	NO	NO	NO	663, 1164	1164	0.412, 0.452	0.452	0.432
AT1G11910	A0A1P8AV08, O65390, Q56YW8, Q56Z71	APA1	APA1, ATAPA1, AtPaspA1, PaspA1	aspartic proteinase A1	6.0169	6.02138	6.14153	5.27968	5.28799	5.51976	6.05993	5.36248	DOWN	0.549	-0.865	6.9e-06	6.1655	6.17125	6.21812	6.35761	6.45565	6.5025	6.18496	6.43858	N.S.	1.027	0.039	0.63228	STRINGENT	3UTR,3UTR	YES	YES	NO	3UTR	3UTR	Stop codon	2088, 2730	2730	0.407, 0.435	0.435	0.421
AT1G11915	O65389	AT1G11915		wall-associated receptor kinase galacturonan-binding protein	0.279141	0.361615	0.0687674	1.03955	0.599749	0.315817	0.236508	0.651706	N.S.	1.766	0.821	0.07036	0.793828	0.691964	0.865671	1.09419	0.902365	1.03048	0.783821	1.00901	N.S.	1.03	0.043	0.74898	Non-Target	NO	NO	NO	NO	NO	NO	NO	1278	1278	0.406	0.406	0.406
AT1G11920	A0A178WEL6, O65388	AT1G11920		Pectin lyase-like superfamily protein	0.0439499	0.192913	0.0672137	0	0	0.0868069	0.101359	0.0289356	N.A.	N.A.	N.A.	N.A.	0.137563	0.129955	0.141274	0.191517	0.116983	0	0.136264	0.102833	N.A.	N.A.	N.A.	N.A.	N.A.	NO	NO	NO	NO	NO	NO	NO	1305	1305	0.434	0.434	0.434
AT1G11930	C0Z2F5, O65386, Q944L8	AT1G11930		Putative pyridoxal phosphate-dependent enzyme, YBL036C type	3.09983	3.04475	2.87747	2.65935	2.81313	2.78273	3.00735	2.75174	N.S.	0.839	-0.253	0.27336	3.12375	3.04158	3.09967	3.17155	3.15838	2.92588	3.08833	3.08527	N.S.	0.943	-0.085	0.20737	PERMISSIVE	NO	YES	YES	NO	3UTR	3UTR	NO	1102, 1314	1314	0.419, 0.436	0.436	0.428
AT1G11940	A0A178W9A5, A0A178WB93, Q8GYH0	AT1G11940		Core-2/I-branching beta-1,6-N-acetylglucosaminyltransferase family protein	1.64459	1.31538	1.43564	1.37784	1.4544	1.41588	1.4652	1.41604	N.S.	0.989	-0.016	0.9631	1.35981	1.34069	1.51015	1.37177	1.51107	1.4568	1.40355	1.44655	N.S.	1.033	0.047	0.59485	Non-Target	NO	NO	NO	NO	NO	NO	NO	1595, 1786	1786	0.404, 0.394	0.404	0.399
AT1G11950	A0A1P8AUH1, A0A384KZA5	AT1G11950		Transcription factor jumonji (jmjC) domain-containing protein	0.466348	0.57662	0.778639	0.597794	0.637808	0.322424	0.607203	0.519342	N.S.	0.939	-0.09	0.80245	0.686142	0.75818	0.852941	0.925586	0.926594	0.74043	0.765755	0.864204	N.S.	1.128	0.174	0.06148	Non-Target	NO	NO	NO	NO	NO	NO	NO	3160, 3188, 3217	3217	0.398, 0.399, 0.405	0.405	0.401
AT1G11960	A0A1P8ANP4, B5TYT3	AT1G11960		ERD (early-responsive to dehydration stress) family protein	3.39423	3.60366	3.66902	3.9002	3.71714	3.52389	3.55564	3.71374	N.S.	1.203	0.267	0.27904	1.23799	1.05471	1.17626	0.981063	1.39065	1.17646	1.15632	1.18272	N.S.	0.988	-0.018	0.90895	Non-Target	NO	NO	NO	NO	NO	NO	NO	2862, 2946, 3053	3053	0.407, 0.404	0.407	0.405
AT1G11990	A0A384KB25, F4IAL1, F4IAL1-2, F4IAL1-3	AT1G11990		O-fucosyltransferase family protein	0	0.0698674	0	0.0423801	0.107896	0.103047	0.0232891	0.0844409	N.A.	N.A.	N.A.	N.A.	N.E.	N.E.	N.E.	N.E.	N.E.	N.E.	N.E.	N.E.	N.E.	N.E.	N.E.	N.E.	N.A.	NO	NO	NO	NO	NO	NO	NO	1853, 2084	2084	0.426, 0.437	0.437	0.432
AT1G12000	Q8W4M5	AT1G12000		Phosphofructokinase family protein	5.26535	5.07157	4.90776	5.06439	4.84809	4.79824	5.08156	4.90357	N.S.	0.904	-0.145	0.50464	5.35675	5.33912	5.39883	5.48669	5.56577	5.71248	5.3649	5.58832	N.S.	1.087	0.121	0.3269	STRINGENT	3UTR	YES	YES	3UTR	3UTR	3UTR	Stop codon	2108	2108	0.445	0.445	0.445
AT1G12010	O65378	AT1G12010	ACO3	2-oxoglutarate (2OG) and Fe(II)-dependent oxygenase superfamily protein	2.49712	2.07356	2.58886	2.2839	1.77456	1.99537	2.38651	2.01795	N.S.	0.77	-0.378	0.21169	2.55905	2.44412	2.67967	2.88011	2.86841	2.82484	2.56095	2.85778	N.S.	1.158	0.212	0.24466	Non-Target	NO	NO	NO	NO	NO	NO	NO	1370	1370	0.409	0.409	0.409
AT1G12020	O65377	AT1G12020		hypothetical protein	1.28924	1.43741	1.39525	2.14369	2.16931	1.96469	1.37396	2.09256	UP	2.451	1.294	1.5e-06	1.59094	1.5262	1.58427	1.8006	1.66184	1.69708	1.56714	1.71984	N.S.	0.977	-0.033	0.71575	Non-Target	NO	NO	NO	NO	NO	NO	NO	2187	2187	0.39	0.39	0.39
AT1G12040	A0A178WI96, O65375	LRX1	LRX1	leucine-rich repeat/extensin 1	2.11804	2.21039	2.49835	2.15632	1.43791	2.1383	2.27559	1.91084	N.S.	0.803	-0.316	0.31706	2.14554	2.04195	2.23205	2.20291	2.6205	3.09975	2.13985	2.64105	UP	1.51	0.595	0.00013	Non-Target	NO	NO	NO	NO	NO	NO	NO	2690	2690	0.462	0.462	0.462
AT1G12050	A0A178W9V5, Q8RW90	AT1G12050	AtFAH, FAH, SSCD1	fumarylacetoacetase	2.62376	2.54209	2.57091	2.81489	2.42822	2.47286	2.57892	2.57199	N.S.	1.062	0.087	0.76048	3.31435	3.23169	3.36072	3.24203	3.18035	3.26425	3.30225	3.22888	N.S.	0.974	-0.038	0.53719	PERMISSIVE	NO	YES	YES	3UTR	3UTR	3UTR	NO	1686	1686	0.438	0.438	0.438
AT1G12060	O65373	BAG5	ATBAG5, BAG5	BCL-2-associated athanogene 5	1.47993	1.98835	1.65358	2.54842	2.52928	2.48536	1.70729	2.52102	UP	2.449	1.292	0.00011	1.50601	1.67708	1.69885	1.95906	1.80342	1.4378	1.62731	1.73343	N.S.	0.985	-0.022	0.88723	Non-Target	NO	NO	NO	NO	NO	NO	NO	1005	1005	0.419	0.419	0.419
AT1G12070	O65371	AT1G12070		Immunoglobulin E-set superfamily protein	0.567638	0.216012	0.489196	0.196335	0.264913	0.268847	0.424282	0.243365	N.A.	N.A.	N.A.	N.A.	0.412773	0.455137	0.256095	0.368807	0.305755	0	0.374669	0.224854	DOWN	0.577	-0.794	0.00046	Non-Target	NO	NO	NO	NO	NO	5UTR	NO	1168	1168	0.384	0.384	0.384
AT1G12080	O65370, Q8LC93	AT1G12080		Vacuolar calcium-binding protein-like protein	6.54535	6.27863	6.12423	7.5523	7.07548	6.91563	6.31607	7.18114	UP	2.486	1.314	2.3e-07	5.46265	5.29003	5.30703	5.54393	5.36122	5.26885	5.35324	5.39133	N.S.	1.031	0.044	0.64357	Non-Target	NO	NO	NO	NO	NO	NO	NO	590, 841	841	0.414, 0.401	0.414	0.408
AT1G12090	O65369	ELP	ELP	extensin-like protein	6.40074	6.088	6.05195	6.54376	6.54035	6.63738	6.18023	6.57383	UP	1.536	0.619	0.00026	6.01049	6.13836	6.13885	6.31627	6.40897	6.48506	6.0959	6.40343	N.S.	1.016	0.023	0.8994	Non-Target	NO	NO	NO	NO	NO	5UTR, CDS, 3UTR	NO	1194	1194	0.367	0.367	0.367
AT1G12100	A0A178WGZ4, O65368	AT1G12100		Bifunctional inhibitor/lipid-transfer protein/seed storage 2S albumin superfamily protein	0.163127	0	0	0	0	0	0.0543756	0	N.A.	N.A.	N.A.	N.A.	1.67676	1.15674	1.19465	0.748607	1.00696	0.726784	1.34271	0.827451	N.S.	0.764	-0.389	0.0765	Non-Target	NO	NO	NO	NO	NO	NO	NO	437	437	0.426	0.426	0.426
AT1G12110	Q05085	NRT1.1	AtNPF6.3, ATNRT1, B-1, CHL1, CHL1-1, NPF6.3, NRT1, NRT1.1	nitrate transporter 1.1	4.29169	4.54337	4.57804	3.84643	3.78318	4.15452	4.47103	3.92804	DOWN	0.649	-0.623	0.01058	5.4145	5.28027	5.18483	5.33274	5.34598	5.63324	5.2932	5.43732	N.S.	1.156	0.209	0.19167	Non-Target	NO	NO	NO	3UTR	NO	NO	NO	2202	2202	0.454	0.454	0.454
AT1G12120	Q9FWW2	AT1G12120		hypothetical protein (DUF863)	3.27053	2.96937	2.75423	2.81266	2.70536	2.82356	2.99804	2.78053	N.S.	0.86	-0.217	0.37215	2.66293	2.67941	2.84438	2.83112	2.8245	2.72046	2.7289	2.79203	N.S.	0.959	-0.061	0.6444	PERMISSIVE	NO	YES	YES	3UTR	3UTR	3UTR	NO	2072	2072	0.403	0.403	0.403
AT1G12140	A8MRX0, A8MRX0-2	FMO GS-OX5	FMO GS-OX5	flavin-monooxygenase glucosinolate S-oxygenase 5	2.94626	3.00531	3.04465	2.56423	3.14412	3.00618	2.99874	2.90484	N.S.	0.995	-0.007	0.98243	3.80094	3.86504	3.901	3.95829	4.02913	4.187	3.85566	4.05814	1/1.5<=FC<=1.5	1.145	0.196	0.00355	Non-Target	NO	NO	NO	NO	NO	NO	NO	1397, 1567, 2230	2230	0.439, 0.464, 0.445	0.464	0.449
AT1G12150	Q9FWW5	AT1G12150		weak chloroplast movement under blue light protein (DUF827)	1.59085	1.51761	1.74337	1.15896	1.16074	1.47707	1.61728	1.26559	N.S.	0.749	-0.418	0.18236	0.369839	0.376913	0.591558	0.463581	0.529669	0.397	0.446103	0.463417	N.S.	0.939	-0.091	0.55983	N.A.	NO	NO	NO	NO	NO	NO	NO	1762, 1774	1774	0.433, 0.432	0.433	0.432
AT1G12160	Q9FWW6	AT1G12160	FMOGS-OX7	Flavin-binding monooxygenase family protein	2.73673	2.28156	1.87581	1.58655	1.75351	1.47531	2.29803	1.60512	DOWN	0.506	-0.983	0.00373	2.76082	2.66918	2.86241	2.59972	2.51113	2.47602	2.76414	2.52896	1/1.5<=FC<=1.5	0.702	-0.511	7.9e-06	PERMISSIVE	NO	YES	NO	NO	NO	NO	NO	1705	1705	0.452	0.452	0.452
AT1G12180	Q3EDD8	AT1G12180		14.7 kDa heat shock-like protein	0	0	0	0	0	0.337206	0	0.112402	N.A.	N.A.	N.A.	N.A.	0.075319	0	0	0	0	0	0.0251063	0	N.A.	N.A.	N.A.	N.A.	N.A.	NO	NO	NO	NO	NO	NO	NO	669	669	0.419	0.419	0.419
AT1G12200	A0A1P8AVR0, Q9FWW9	FMO	FMO	Flavin-binding monooxygenase family protein	0.907852	0.412993	0.668914	2.53084	3.01194	2.34479	0.663253	2.62919	UP	13.55	3.76	< 2e-16	2.54444	2.71911	2.88771	3.0251	3.17683	3.36499	2.71709	3.18897	UP	2.1	1.071	< 2e-16	PERMISSIVE	NO	YES	YES	NO	NO	NO	NO	1837, 1977	1977	0.455, 0.443	0.455	0.449
AT1G12210	A0A1P8AQY6, Q8L3R3	RFL1	RFL1	RPS5-like 1	0.584007	0.46347	0.488364	0.781223	1.09565	0.671543	0.511947	0.849473	UP	1.814	0.859	0.02965	0.44346	0.407721	0.391971	0.513443	0.902066	0.376338	0.414384	0.597282	1/1.5<=FC<=1.5	1.496	0.581	3.9e-05	Non-Target	NO	NO	NO	NO	NO	NO	NO	2741, 2993, 3084	3084	0.401, 0.407, 0.409	0.409	0.406
AT1G12211	B3H6A6	AT1G12211		hypothetical protein	0.0223689	0	0	0	0.0480766	0.0437278	0.00745631	0.0306015	N.A.	N.A.	N.A.	N.A.	0.603999	0	0	0.684287	0	0	0.201333	0.228096	N.A.	N.A.	N.A.	N.A.	N.A.	NO	NO	NO	NO	NO	NO	NO	3135	3135	0.413	0.413	0.413
AT1G12220	A0A1P8AW79, O64973	RPS5	RPS5	Disease resistance protein (CC-NBS-LRR class) family	0.303014	0.128565	0.189099	0.239335	0.128962	0.240794	0.206892	0.20303	N.A.	N.A.	N.A.	N.A.	0.673294	0.786592	0.979915	1.04509	0.953835	1.02321	0.813267	1.00738	N.S.	1.054	0.075	0.5763	Non-Target	NO	NO	NO	NO	NO	NO	NO	2851, 3152, 3283	3283	0.401, 0.4, 0.409	0.409	0.403
AT1G12230	F4IC59, Q56WS4, Q9FWX0	AT1G12230		Aldolase superfamily protein	4.52166	4.50145	4.47724	3.73929	3.81725	3.80672	4.50012	3.78775	DOWN	0.529	-0.918	1.3e-08	4.46727	4.4799	4.55358	4.58879	4.77621	4.86997	4.50025	4.74499	N.S.	0.98	-0.028	0.82626	STRINGENT	3UTR,3UTR	YES	YES	NO	3UTR	3UTR	Stop codon	1594, 1720	1720	0.44, 0.445	0.445	0.442
AT1G12240	A0A178W5C9, A0A178W7A1, Q39041	ATBETAFRUCT4	ATBETAFRUCT4, AtFRUCT4, AtVI2, FRUCT4, VAC-INV, VI2	Glycosyl hydrolases family 32 protein	4.87562	4.72668	4.35654	3.69771	3.40329	3.60175	4.65295	3.56759	DOWN	0.363	-1.463	2.6e-11	4.36068	4.1993	4.4053	4.26633	4.27005	4.27956	4.32176	4.27198	1/1.5<=FC<=1.5	0.867	-0.206	0.00179	PERMISSIVE	NO	YES	NO	NO	NO	5UTR, 3UTR	NO	2249	2249	0.457	0.457	0.457
AT1G12244	F4IC62	AT1G12244		Polynucleotidyl transferase, ribonuclease H-like superfamily protein	1.17536	1.06982	0.970204	0.880772	0.554144	0.695102	1.07179	0.710006	N.S.	0.788	-0.344	0.32475	1.42629	1.18261	1.41435	0.848752	1.12991	0.411623	1.34108	0.796761	1/1.5<=FC<=1.5	0.721	-0.472	0.00014	Non-Target	NO	NO	NO	NO	NO	NO	NO	983	983	0.41	0.41	0.41
AT1G12250	A0A178W1Q3, B6EUA5, Q8H1Q1	AT1G12250	TL20.3	Pentapeptide repeat-containing protein	0.380234	0.599218	0.719968	0.435762	0.913175	0.383151	0.566474	0.577363	N.S.	1.032	0.045	0.89003	1.48225	1.30881	1.51337	1.49286	1.37256	1.52909	1.43481	1.46484	N.S.	0.844	-0.245	0.0984	Non-Target	NO	NO	NO	NO	NO	3UTR	Stop codon	1046, 1140, 1186	1186	0.437, 0.427, 0.44	0.44	0.435
AT1G12260	A0A1P8AVF8, Q9FWX2	NAC007	ANAC007, EMB2749, NAC007, VND4	NAC 007	1.85498	2.11738	2.12724	2.15106	1.76527	1.7931	2.0332	1.90314	N.S.	0.946	-0.08	0.80825	1.27623	1.24763	1.39662	1.38151	1.31164	1.45929	1.30683	1.38415	N.S.	1.025	0.035	0.7439	Non-Target	NO	NO	NO	NO	NO	NO	NO	1794, 1953	1953	0.395, 0.397	0.397	0.396
AT1G12270	Q9LNB6	Hop1	Hop1	stress-inducible protein	2.90857	2.43755	2.50076	2.76324	2.51199	2.3092	2.61563	2.52814	N.S.	0.979	-0.031	0.92272	3.4411	3.52546	3.65979	3.77044	3.88061	3.97276	3.54212	3.8746	1/1.5<=FC<=1.5	1.163	0.218	0.01639	STRINGENT	3UTR	YES	NO	3UTR	NO	3UTR	Stop codon	1944	1944	0.442	0.442	0.442
AT1G12280	A0A1P8AUE3, P60838	SUMM2	SUMM2	LRR and NB-ARC domains-containing disease resistance protein	0.387903	0.351848	0.333692	0.426455	0.385366	0.276728	0.357814	0.36285	N.A.	N.A.	N.A.	N.A.	0.471238	0.530163	0.505517	0.587373	0.600926	0.471531	0.502306	0.553276	N.S.	0.916	-0.126	0.4304	Non-Target	NO	NO	NO	NO	NO	NO	NO	2570, 2786	2786	0.408, 0.414	0.414	0.411
AT1G12290	F4IC69, P60839	AT1G12290		Disease resistance protein (CC-NBS-LRR class) family	0.151263	0.2205	0.178848	0.193754	0.154332	0.253959	0.183537	0.200682	N.A.	N.A.	N.A.	N.A.	0.842432	0.767162	0.90192	0.931177	1.18635	1.19583	0.837171	1.10445	N.S.	1.1	0.138	0.23399	Non-Target	NO	NO	NO	NO	NO	NO	NO	2763, 2977, 3108, 3658	3658	0.4, 0.405, 0.398	0.405	0.402
AT1G12300	Q0WKV3	AT1G12300	RFL2	Tetratricopeptide repeat (TPR)-like superfamily protein	0.083325	0.148488	0	0.174882	0.16698	0.0972066	0.077271	0.146356	N.A.	N.A.	N.A.	N.A.	0.702765	0.629702	0.850848	1.00437	0.967889	0.95295	0.727772	0.97507	1/1.5<=FC<=1.5	1.256	0.329	5.9e-06	Non-Target	NO	NO	NO	NO	NO	NO	NO	3238	3238	0.409	0.409	0.409
AT1G12310	Q94AZ4	AT1G12310		Calcium-binding EF-hand family protein	4.99954	4.94184	4.77777	5.26118	5.09242	5.04141	4.90638	5.13167	1/1.5<=FC<=1.5	1.308	0.387	0.02932	5.17412	5.23075	5.08406	5.34692	5.2145	5.06308	5.16297	5.20817	N.S.	0.894	-0.161	0.06461	STRINGENT	3UTR	YES	YES	NO	3UTR	NO	NO	1581	1581	0.39	0.39	0.39
AT1G12320	Q9LNB3	AT1G12320		ankyrin repeat/KH domain protein (DUF1442)	1.03908	1.0289	1.16698	0.964842	1.13866	0.860166	1.07832	0.98789	N.S.	0.949	-0.076	0.82302	1.46202	1.53305	1.53859	1.34178	1.23433	0.984532	1.51122	1.18688	N.S.	1.132	0.179	0.29051	Non-Target	NO	NO	NO	NO	NO	NO	NO	3572	3572	0.369	0.369	0.369
AT1G12330	Q56YX5, Q9LNB2	AT1G12330		cyclin-dependent kinase-like protein	0.574067	0.651958	0.410017	0.613016	0.464911	0.351632	0.545348	0.47652	N.A.	N.A.	N.A.	N.A.	0.413468	0.279832	0.467723	0.386074	0.588102	0.370225	0.387007	0.448133	N.S.	1.145	0.195	0.19812	Non-Target	NO	NO	NO	NO	NO	NO	NO	1893	1893	0.429	0.429	0.429
AT1G12340	Q3EDD7	AT1G12340		Cornichon family protein	0	0	0	0.147794	0	0	0	0.0492646	N.A.	N.A.	N.A.	N.A.	2.62241	2.23604	2.6828	2.51697	2.21511	2.26678	2.51375	2.33295	1/1.5<=FC<=1.5	0.741	-0.433	1.4e-05	N.A.	NO	NO	NO	NO	NO	NO	NO	668	668	0.382	0.382	0.382
AT1G12350	Q8GXR5	COAB	ATCOAB, COAB	4-phospho-panto-thenoylcysteine synthetase	3.01941	3.02081	2.95514	2.88045	2.86277	2.91745	2.99845	2.88689	N.S.	0.957	-0.064	0.79968	2.63351	2.50253	2.57845	2.55127	2.55727	2.47182	2.5715	2.52679	1/1.5<=FC<=1.5	0.906	-0.143	0.0255	Non-Target	NO	NO	NO	3UTR	NO	NO	NO	1398, 1598	1598	0.395, 0.388	0.395	0.392
AT1G12360	Q9C5X3	KEU	KEU, SEC11	Sec1/munc18-like (SM) proteins superfamily	4.1411	4.10419	4.10169	3.54442	3.69805	3.81438	4.11566	3.68562	1/1.5<=FC<=1.5	0.714	-0.486	0.0107	2.89897	2.74286	3.02265	3.04683	3.0456	3.08345	2.88816	3.05863	N.S.	0.967	-0.049	0.46343	STRINGENT	3UTR	YES	NO	NO	3UTR	3UTR	Stop codon	2651	2651	0.408	0.408	0.408
AT1G12370	A0A1P8ARP1, Q9SB00, Q9SB00-2	PHR1	PHR1, UVR2	photolyase 1	1.51162	1.38848	1.6189	1.97124	1.89383	1.90102	1.50633	1.92203	UP	1.636	0.71	0.00936	2.35221	2.29161	2.31043	2.52329	2.62734	2.76417	2.31808	2.63827	N.S.	1.084	0.117	0.06239	Non-Target	NO	NO	NO	NO	NO	NO	NO	1650, 1667, 1788	1788	0.445, 0.441, 0.449	0.449	0.445
AT1G12380	A0A178W786, Q9LNA8	AT1G12380		hypothetical protein	0.429894	0.284405	0.148744	0.59355	0.295482	0.273613	0.287681	0.387548	N.A.	N.A.	N.A.	N.A.	1.22429	1.14795	1.26276	1.24901	1.16032	1.5781	1.21167	1.32914	N.S.	1.005	0.007	0.9693	Non-Target	NO	NO	NO	NO	NO	NO	NO	3155	3155	0.437	0.437	0.437
AT1G12390	Q84W04	AT1G12390		Cornichon family protein	4.05941	3.75578	3.80428	3.46908	3.41771	3.45271	3.87316	3.4465	1/1.5<=FC<=1.5	0.707	-0.501	0.00781	3.72327	3.57036	3.47205	3.30936	3.15303	2.93289	3.58856	3.13176	DOWN	0.652	-0.618	< 2e-16	PERMISSIVE	NO	YES	YES	NO	NO	NO	NO	1039	1039	0.394	0.394	0.394
AT1G12400	A0A1P8AR18, Q6NNM0	AT1G12400		Nucleotide excision repair, TFIIH, subunit TTDA	3.74669	3.31411	3.19689	3.15397	3.02937	3.19891	3.41923	3.12742	N.S.	0.811	-0.302	0.25177	3.04358	3.01782	3.07061	3.03353	3.12161	3.08953	3.044	3.08156	1/1.5<=FC<=1.5	0.884	-0.177	0.01883	PERMISSIVE	NO	YES	YES	NO	NO	NO	NO	653, 729, 763	763	0.348, 0.357, 0.356	0.357	0.354
AT1G12410	Q9XJ36	2	CLP2, CLPR2, EMB3146, NCLPP2	CLP protease proteolytic subunit 2	3.53388	3.45705	3.51012	3.72142	3.74054	3.60246	3.50035	3.68814	N.S.	1.263	0.337	0.07824	4.19456	4.07667	4.21402	4.22471	3.9952	4.03808	4.16175	4.086	N.S.	0.894	-0.162	0.0597	STRINGENT	3UTR	NO	YES	3UTR	3UTR	3UTR	Stop codon	1209	1209	0.426	0.426	0.426
AT1G12411	B3H5E5	AT1G12411		hypothetical protein	0.592394	0	0	0	0	0	0.197465	0	N.A.	N.A.	N.A.	N.A.	N.E.	N.E.	N.E.	N.E.	N.E.	N.E.	N.E.	N.E.	N.E.	N.E.	N.E.	N.E.	N.A.	NO	NO	NO	NO	NO	NO	NO	162	162	0.414	0.414	0.414
AT1G12420	A0A1P8AQK2, Q9LNA5	ACR8	ACR8	ACT domain repeat 8	2.32813	2.20784	1.88861	2.47185	1.96351	2.07953	2.14153	2.17163	N.S.	1.088	0.121	0.69723	1.4783	1.24039	1.46961	1.55511	1.7491	1.73838	1.3961	1.68086	1/1.5<=FC<=1.5	1.126	0.171	0.01183	Non-Target	NO	NO	NO	NO	NO	NO	NO	1779, 2054	2054	0.382	0.382	0.382
AT1G12430	F4IC87, Q9FZ06	ARK3	ARK3, AtKINUa, PAK	armadillo repeat kinesin 3	0.727955	0.375185	0.495307	0.949997	1.03233	0.800099	0.532816	0.927477	UP	1.933	0.951	0.01253	0.962899	0.988134	1.21314	1.24141	1.41856	1.40416	1.05472	1.35471	1/1.5<=FC<=1.5	1.264	0.338	0.00379	Non-Target	NO	NO	NO	NO	NO	NO	Stop codon	3224, 3408	3408	0.411, 0.416	0.416	0.414
AT1G12440	Q6NNI8	AT1G12440		A20/AN1-like zinc finger family protein	4.08608	3.9273	4.00881	4.63915	4.2337	4.32055	4.00739	4.3978	UP	1.543	0.626	0.00239	3.8963	4.00869	4.05502	4.42659	4.27282	4.18199	3.98667	4.2938	N.S.	0.894	-0.161	0.06088	Non-Target	NO	NO	NO	NO	3UTR	3UTR	NO	1333, 1489, 1543	1543	0.402, 0.416, 0.404	0.416	0.407
AT1G12450	Q6NQK3	AT1G12450		SNARE associated Golgi protein family	2.66282	2.55906	2.54483	2.34055	2.12471	2.4595	2.5889	2.30825	N.S.	0.824	-0.28	0.25018	2.02018	1.63478	1.95977	1.71648	1.67277	1.57753	1.87158	1.65559	1/1.5<=FC<=1.5	0.849	-0.237	0.00043	Non-Target	NO	NO	NO	NO	NO	NO	NO	1689	1689	0.38	0.38	0.38
AT1G12460	A0A1P8APZ0, C0LGE4	AT1G12460		Leucine-rich repeat protein kinase family protein	0.864434	0.594703	0.72833	0.888805	0.467025	0.702961	0.729156	0.686264	N.S.	1	-0.001	0.99776	1.16523	1.00024	1.20648	1.20533	1.20058	1.24159	1.12399	1.21583	N.S.	1.006	0.009	0.92778	Non-Target	NO	NO	NO	NO	NO	NO	NO	2930, 3448	3448	0.403, 0.409	0.409	0.406
AT1G12470	F4IDS7	AT1G12470	VPS18	zinc ion binding protein	3.39646	3.31628	3.25793	3.17744	3.20401	3.11449	3.32356	3.16531	N.S.	0.914	-0.13	0.49445	2.22519	2.11833	2.42228	2.41376	2.66141	2.75844	2.25527	2.6112	1/1.5<=FC<=1.5	1.234	0.304	7.2e-10	STRINGENT	3UTR	YES	NO	3UTR	NO	3UTR	Stop codon	3323	3323	0.422	0.422	0.422
AT1G12480	Q9LD83	OZS1	CDI3, OZS1, RCD3, SLAC1	C4-dicarboxylate transporter/malic acid transport protein	0.478382	0.62471	0.621804	0.837482	0.476352	0.402255	0.574965	0.57203	N.S.	1.042	0.059	0.87001	0	0	0.0160672	0	0	0	0.00535574	0	N.A.	N.A.	N.A.	N.A.	Non-Target	NO	NO	NO	NO	NO	NO	NO	1881	1881	0.418	0.418	0.418
AT1G12500	Q9LDH3	AT1G12500		Nucleotide-sugar transporter family protein	3.31447	2.98524	2.77517	3.3281	2.69755	2.7224	3.02496	2.91602	N.S.	0.985	-0.021	0.94995	3.32756	3.3346	3.38657	3.42212	3.40568	3.56936	3.34958	3.46572	N.S.	0.989	-0.017	0.89009	Non-Target	NO	NO	NO	NO	NO	NO	NO	1677	1677	0.412	0.412	0.412
AT1G12520	Q9LD47, Q9LD47-2, Q9LD47-3	CCS	ATCCS, CCS	copper chaperone for SOD1	3.51417	3.49619	3.37156	3.40491	3.24858	3.28612	3.46064	3.3132	N.S.	0.928	-0.108	0.63426	3.36466	3.32071	3.35613	3.24865	3.01715	3.14014	3.34716	3.13531	N.S.	0.964	-0.054	0.59353	PERMISSIVE	NO	YES	YES	3UTR	3UTR	3UTR	NO	1245, 1248, 1253	1253	0.433, 0.442, 0.439	0.442	0.438
AT1G12530	Q5Q0H5, Q5Q0H6, Q9LN90	AT1G12530	MOS9	hypothetical protein	3.55776	3.48375	3.53502	3.23989	3.23295	3.41312	3.52551	3.29532	N.S.	0.864	-0.211	0.36345	2.8553	2.73989	3.01795	2.71384	2.64212	2.78651	2.87105	2.71415	N.S.	0.947	-0.078	0.49166	Non-Target	NO	NO	NO	3UTR	NO	3UTR	Stop codon	854	854	0.388	0.388	0.388
AT1G12550	Q9LE33	HPR3	HPPR3, HPR3	D-isomer specific 2-hydroxyacid dehydrogenase family protein	2.01002	1.96616	2.10227	1.70873	1.35863	1.88771	2.02615	1.65169	N.S.	0.772	-0.374	0.22443	1.92239	1.71613	1.90176	1.82248	1.54402	1.59305	1.84676	1.65319	1/1.5<=FC<=1.5	0.76	-0.395	2.7e-05	Non-Target	NO	NO	NO	NO	NO	NO	NO	1290	1290	0.443	0.443	0.443
AT1G12560	Q9LN94	EXPA7	ATEXP7, ATEXPA7, ATHEXP ALPHA 1.26, EXP7, EXPA7	expansin A7	4.17123	4.52538	4.60824	4.68786	4.56236	4.95426	4.43495	4.73483	N.S.	1.335	0.417	0.11706	4.83858	4.73044	4.82495	4.68063	4.52209	4.62406	4.79799	4.60893	N.S.	0.87	-0.201	0.07964	Non-Target	NO	NO	NO	NO	NO	NO	NO	1117	1117	0.439	0.439	0.439
AT1G12570	Q66GI5, Q9LN93	AT1G12570		Glucose-methanol-choline (GMC) oxidoreductase family protein	0.0234567	0.0547722	0	0	0	0	0.0260763	0	N.A.	N.A.	N.A.	N.A.	0.028843	0.0668134	0.0490844	0	0.102933	0	0.048247	0.034311	N.A.	N.A.	N.A.	N.A.	Non-Target	NO	NO	NO	NO	NO	NO	NO	2342	2342	0.447	0.447	0.447
AT1G12580	Q9LDQ1	PEPKR1	PEPKR1	phosphoenolpyruvate carboxylase-related kinase 1	3.94324	3.64553	3.63609	3.72922	3.47234	3.53478	3.74162	3.57878	N.S.	0.915	-0.129	0.5674	3.10841	2.95817	3.13778	3.14642	2.93961	2.926	3.06812	3.00401	1/1.5<=FC<=1.5	0.831	-0.266	9.4e-07	Non-Target	NO	NO	NO	NO	3UTR	3UTR	NO	2124	2124	0.423	0.423	0.423
AT1G12600	A0A178WAM6, Q9LDX3	AT1G12600		UDP-N-acetylglucosamine (UAA) transporter family	0.463791	0.170917	0	0.054313	0	0.213662	0.211569	0.089325	N.A.	N.A.	N.A.	N.A.	0.700934	0.764559	0.960187	0.631272	0.646924	0.264583	0.80856	0.51426	1/1.5<=FC<=1.5	0.739	-0.437	0.00874	Non-Target	NO	NO	NO	NO	NO	NO	NO	1470	1470	0.384	0.384	0.384
AT1G12610	Q9LN86	DDF1	ATDDF1, DDF1	Integrase-type DNA-binding superfamily protein	2.49805	2.72125	2.40031	3.02784	1.98354	2.73064	2.53987	2.58068	N.S.	1.127	0.172	0.60788	0.0347762	0.0327121	0	0	0	0	0.0224961	0	N.A.	N.A.	N.A.	N.A.	Non-Target	NO	NO	NO	NO	NO	NO	NO	1135	1135	0.422	0.422	0.422
AT1G12620	Q9ASZ8	AT1G12620		Pentatricopeptide repeat (PPR) superfamily protein	0.367779	0.22949	0.211027	0.400956	0.499093	0.423077	0.269432	0.441042	N.A.	N.A.	N.A.	N.A.	1.15878	0.915745	1.15611	1.34441	1.27635	1.12499	1.07688	1.24858	N.S.	1.087	0.12	0.14186	Non-Target	NO	NO	NO	NO	NO	NO	NO	2543	2543	0.401	0.401	0.401
AT1G12630	Q38Q39	AT1G12630		Integrase-type DNA-binding superfamily protein	0.479982	0.149934	0.276546	0.396236	0.434069	0	0.302154	0.276768	N.A.	N.A.	N.A.	N.A.	0.177039	0.491605	0.375161	0.377007	0.184073	0	0.347935	0.187027	N.A.	N.A.	N.A.	N.A.	N.A.	NO	NO	NO	NO	NO	NO	NO	906	906	0.466	0.466	0.466
AT1G12640	F4IDU4	LPLAT1	AtLPLAT1, LPCAT1, LPLAT1	MBOAT (membrane bound O-acyl transferase) family protein	4.38237	4.07366	4.13758	3.45788	3.47178	3.56256	4.19787	3.49741	DOWN	0.534	-0.906	1.1e-07	3.57122	3.42947	3.61178	3.5038	3.43449	3.46889	3.53749	3.46906	1/1.5<=FC<=1.5	0.798	-0.325	2e-06	PERMISSIVE	NO	YES	YES	3UTR	NO	3UTR	NO	1936	1936	0.419	0.419	0.419
AT1G12663	A0A178W8G0, A8MRP4	AT1G12663		thionin-like protein	0.177712	0	0	1.32738	0.934624	0.330944	0.0592373	0.864317	N.S.	1.258	0.331	0.06061	0.20768	0	0.325299	0.226524	0.203669	0	0.177659	0.143398	N.A.	N.A.	N.A.	N.A.	N.A.	NO	NO	NO	NO	NO	NO	NO	410	410	0.4	0.4	0.4
AT1G12672	F4IDV2, F4IDV3	AT1G12672		thionin-like protein	0	0	0	0.281818	0	0.207681	0	0.163166	N.A.	N.A.	N.A.	N.A.	0	0	0.0777089	0	0.178165	0	0.025903	0.0593885	N.A.	N.A.	N.A.	N.A.	N.A.	NO	NO	NO	NO	NO	NO	NO	405, 600	600	0.348, 0.373	0.373	0.36
AT1G12680	Q8W490	PEPKR2	PEPKR2	phosphoenolpyruvate carboxylase-related kinase 2	2.58518	2.56314	2.67415	2.73586	2.66323	2.65834	2.60749	2.68581	N.S.	1.136	0.183	0.41385	2.38535	2.44247	2.56753	2.70063	2.65007	2.46567	2.46512	2.60546	N.S.	0.959	-0.06	0.33362	Non-Target	NO	NO	NO	3UTR	NO	NO	NO	2262	2262	0.427	0.427	0.427
AT1G12700	A0A1P8ANP1, P0C7Q7	RPF1	RPF1	RNA processing FACTOR	0.14881	0.138497	0.170341	0.15751	0	0	0.152549	0.0525032	N.A.	N.A.	N.A.	N.A.	0.37945	0.206891	0.3723	0.353583	0.40198	0.50762	0.319547	0.421061	N.S.	1.067	0.093	0.52011	Non-Target	NO	NO	NO	NO	NO	NO	NO	1809, 2550, 2745	2745	0.383, 0.388, 0.387	0.388	0.386
[truncated: 22,079 more rows]
