# Supplementary material for: The YTHDF proteins ECT2 and ECT3 bind largely overlapping target sets and influence target mRNA abundance, not alternative polyadenylation
Source: eLife journal article supplement (doi:10.7554/elife.72377), 2021-09-30
Supplement: supp [file elife-72377-supp-v1.zip › elife_poa_e72377_Supplementary_file_6.xlsx]

## Sheet: Headers
Supplementary File 6
Differential expression analysis of miRNA (4-day-old root tips)
Column Headers	Description	Values
Gene_ID	AGI locus code
miRNA	Mature miRNA
R1_Col-0 WT	Expression values (loge(RPM+1)) of the 1st replicate of Col-0 WT	Numerical value
R2_Col-0 WT	Expression values (loge(RPM+1)) of the 2nd replicate of Col-0 WT
R1_te234	Expression values (loge(RPM+1)) of the 1st replicate of te234
R2_te234	Expression values (loge(RPM+1)) of the 2nd replicate of te234
Avg_Col-0 WT	Average loge(RPM+1) of Col-0 WT samples
Avg_te234	Average loge(RPM+1) of te234 samples
DEA	Differential miRNA expression between triple ect2/ect3/ect4 KO (te234) and wild type in root tips	UP (Upregulated): if FC>1.5, and p-adj <= 0.05 DOWN (Downregulated): if FC<[1/1.5], and p-adj <= 0.05 N.S. (Not Significant): if p-adj>0.05
FC	Fold Change [te234 / Col-0 WT]	Numerical value
log2(FC)	log2 (Fold Change [te234 / Col-0 WT])
p-adj	BH (Benjamini-Hochberg)-adjusted p-value

## Sheet: miRNA DEA
Gene_ID	miRNa	te234 R1	te234 R2	Col-0 WT R1	Col-0 WT R2	Avg_te234	Avg_WT	DEA	FC	log2(FC)	p-adj
AT2G25095	miR156a	1848.17	1755.61	1699.67	1577.34	1801.89	1638.51	N.S.	1.37	0.45	0.2
AT4G30972	miR156b	1870.84	1779.27	1717.55	1592.05	1825.05	1654.8	N.S.	1.37	0.45	0.19
AT4G31877	miR156c	1854.26	1759.2	1704.71	1577.88	1806.73	1641.3	N.S.	1.37	0.45	0.2
AT5G10945	miR156d	1808.92	1715.11	1654.93	1541.5	1762.02	1598.22	N.S.	1.37	0.45	0.19
AT5G11977	miR156e	1841.29	1742.3	1702.59	1583.82	1791.79	1643.2	N.S.	1.35	0.43	0.21
AT5G26147	miR156f	1832.74	1732.58	1683.13	1569.17	1782.66	1626.15	N.S.	1.36	0.44	0.2
AT2G19425	miR156g	17.67	19.16	17.8	18.91	18.41	18.36	N.S.	1.25	0.32	0.54
AT1G66783	miR157a	815.97	617.58	2036.65	1889.06	716.77	1962.85	DOWN	0.45	-1.16	0
AT1G66795	miR157b	815.87	617.5	2036.57	1889	716.68	1962.78	DOWN	0.45	-1.16	0
AT3G18217	miR157c	294.66	233.25	652.52	594.21	263.96	623.37	DOWN	0.52	-0.94	0
AT1G48742	miR157d	6.2	6.34	18.35	17.59	6.27	17.97	DOWN	0.43	-1.21	0
AT3G10745	miR158a	35083.7	20940	22988.4	31401.7	28011.8	27195.1	N.S.	1.26	0.33	0.48
AT1G55591	miR158b	730.97	428.55	329.33	469.95	579.76	399.64	UP	1.77	0.82	0.02
AT1G73687	miR159a	1109.27	1488.55	880.87	843.98	1298.91	862.43	UP	1.89	0.92	0.01
AT1G18075	miR159b	830.67	1143.24	667.57	657.24	986.95	662.4	UP	1.88	0.91	0.01
AT2G46255	miR159c	254.64	370.59	183.29	202.77	312.61	193.03	UP	2.06	1.04	0
AT2G39175	miR160a	89.48	105.15	94.13	78.76	97.31	86.44	N.S.	1.4	0.49	0.25
AT4G17788	miR160b	123.72	121.7	132.33	126.54	122.71	129.43	N.S.	1.17	0.23	0.6
AT5G46845	miR160c	106.84	118.81	110.83	96.58	112.82	103.71	N.S.	1.36	0.44	0.3
AT1G48267	miR161.1	2422.74	2169.79	1869.66	2298.87	2296.26	2084.26	N.S.	1.37	0.45	0.19
AT1G48267	miR161.2	2422.74	2169.79	1869.66	2298.87	2296.26	2084.26	N.S.	1.37	0.45	0.19
AT5G08185	miR162a	2863.27	2349.31	1143.09	1455.72	2606.29	1299.41	UP	2.48	1.31	0
AT5G23065	miR162b	2877.18	2363.25	1156.56	1470.49	2620.22	1313.53	UP	2.46	1.3	0
AT1G66725	miR163	1258.12	1450.52	1141.28	1160.81	1354.32	1151.04	N.S.	1.47	0.56	0.12
AT2G47585	miR164a	47.79	57.54	51.2	51.26	52.66	51.23	N.S.	1.28	0.36	0.44
AT5G01747	miR164b	57.54	68.46	66.8	65.55	63	66.17	N.S.	1.19	0.25	0.63
AT5G27807	miR164c	93.7	95.64	96.73	95.92	94.67	96.33	N.S.	1.22	0.29	0.51
AT1G01183	miR165a	300.18	437.7	206.77	216.94	368.94	211.85	UP	2.2	1.14	0
AT4G00885	miR165b	260.16	382.21	170.77	176.6	321.18	173.69	UP	2.35	1.23	0
AT2G46685	miR166a	680.21	902.95	492.15	461.31	791.58	476.73	UP	2.08	1.06	0
AT3G61897	miR166b	625.49	838.79	453.24	426.49	732.14	439.86	UP	2.1	1.07	0
AT5G08712	miR166c	548.1	745.05	390.85	368.03	646.57	379.44	UP	2.14	1.1	0
AT5G08717	miR166d	544.76	741.03	387.86	361.96	642.9	374.91	UP	2.16	1.11	0
AT5G41905	miR166e	577.28	783.36	415.27	388.44	680.32	401.85	UP	2.13	1.09	0
AT5G43603	miR166f	572.7	777.73	409.91	384.05	675.21	396.98	UP	2.14	1.1	0
AT5G63715	miR166g	572.7	778.57	410.46	384.36	675.63	397.41	UP	2.14	1.1	0
AT3G22886	miR167a	67.33	83.17	21.43	18.67	75.25	20.05	UP	4.72	2.24	0
AT3G63375	miR167b	67.28	82.19	21.43	18.55	74.73	19.99	UP	4.69	2.23	0
AT3G04765	miR167c	288.04	266.43	332.8	308.36	277.23	320.58	N.S.	1.07	0.1	0.86
AT1G31173	miR167d	58.79	73.67	18.27	15.79	66.23	17.03	UP	4.89	2.29	0
AT4G19395	miR168a	118.98	121.7	135.25	125.22	120.34	130.23	N.S.	1.15	0.2	0.69
AT5G45307	miR168b	116.79	127.4	123.98	120.17	122.1	122.08	N.S.	1.25	0.32	0.47
AT3G13405	miR169a	4.9	3.45	8.03	7.38	4.17	7.71	N.S.	0.66	-0.59	0.34
AT5G24825	miR169b	8.65	6.34	12.45	12.67	7.49	12.56	N.S.	0.73	-0.45	0.41
AT1G53683	miR169d	15.79	13.8	99.33	86.08	14.8	92.7	DOWN	0.2	-2.35	0
AT1G53687	miR169e	5	7.39	28.59	23.77	6.2	26.18	DOWN	0.3	-1.76	0
AT3G14385	miR169f	37.21	33.59	177.94	160.93	35.4	169.44	DOWN	0.26	-1.95	0
AT4G21595	miR169g	16.31	13.87	99.33	85.9	15.09	92.61	DOWN	0.2	-2.32	0
AT3G26812	miR169I	2.87	2.18	7.8	4.98	2.52	6.39	N.S.	0.49	-1.04	0.09
AT3G26813	miR169J	2.19	1.48	6.7	3.72	1.83	5.21	N.S.	0.43	-1.21	0.08
AT3G26815	miR169K	2.5	1.62	6.3	4.2	2.06	5.25	N.S.	0.48	-1.05	0.11
AT3G26818	miR169M	2.5	1.62	6.85	4.38	2.06	5.62	N.S.	0.45	-1.15	0.07
AT3G26819	miR169N	1.46	1.48	5.36	3.48	1.47	4.42	N.S.	0.41	-1.29	0.06
AT1G11735	miR171b	28.56	23.66	34.26	33.62	26.11	33.94	N.S.	0.95	-0.08	0.9
AT1G62035	miR171c	30.75	24.86	37.1	34.58	27.8	35.84	N.S.	0.95	-0.07	0.92
AT2G28056	miR172a	3.28	2.18	3.78	4.38	2.73	4.08	N.S.	0.82	-0.28	0.77
AT5G04275	miR172b	7.3	4.51	13	12.43	5.9	12.71	N.S.	0.57	-0.81	0.08
AT3G11435	miR172c	5.99	3.52	7.64	7.56	4.76	7.6	N.S.	0.77	-0.38	0.58
AT3G55512	miR172d	5.37	3.03	6.62	6.48	4.2	6.55	N.S.	0.78	-0.35	0.65
AT5G59505	miR172e	4.69	2.39	10.08	9.3	3.54	9.69	DOWN	0.45	-1.16	0.02
AT3G23125	miR173	810.76	778.71	561.15	539.89	794.74	550.52	UP	1.79	0.84	0
AT2G08855	miR1886	5.42	3.52	4.02	4.98	4.47	4.5	N.S.	1.21	0.28	0.73
AT3G09515	miR1888b	3.28	1.97	2.76	4.02	2.63	3.39	N.S.	0.95	-0.08	0.96
AT4G23713	miR319a	354.54	305.44	490.18	438.26	329.99	464.22	N.S.	0.88	-0.19	0.68
AT5G41663	miR319b	351.83	297.34	527.59	484.12	324.59	505.86	N.S.	0.79	-0.34	0.37
AT2G40805	miR319c	67.49	65.92	99.33	88.54	66.7	93.93	N.S.	0.88	-0.18	0.71
AT5G03475	miR3434	31.43	26.2	18.2	22.15	28.81	20.17	UP	1.77	0.82	0.01
AT2G38325	miR390a	35.13	33.03	42.77	35.9	34.08	39.33	N.S.	1.07	0.1	0.88
AT5G58465	miR390b	34.45	31.27	41.67	35.24	32.86	38.45	N.S.	1.06	0.08	0.91
AT2G39885	miR393a	4.12	4.37	7.8	5.88	4.24	6.84	N.S.	0.77	-0.38	0.61
AT3G55734	miR393b	9.28	6.41	18.59	14.77	7.84	16.68	N.S.	0.58	-0.79	0.07
AT1G20375	miR394a	29.45	28.66	29.22	29.71	29.05	29.47	N.S.	1.22	0.29	0.54
AT1G76135	miR394b	30.17	28.59	29.62	29.95	29.38	29.79	N.S.	1.22	0.29	0.54
AT1G26973	miR395a	1.46	2.75	7.01	6.36	2.1	6.69	DOWN	0.39	-1.36	0.02
AT1G26975	miR395b	2.81	5	4.17	2.94	3.91	3.56	N.S.	1.39	0.47	0.62
AT1G26985	miR395c	2.81	5	4.02	2.94	3.91	3.48	N.S.	1.41	0.5	0.59
AT1G69795	miR395e	1.46	2.75	6.93	6.36	2.1	6.65	DOWN	0.39	-1.35	0.03
AT1G69797	miR395f	2.45	4.51	3.62	2.34	3.48	2.98	N.S.	1.47	0.56	0.56
AT2G10606	miR396a	426.3	435.03	476.55	503.87	430.67	490.21	N.S.	1.09	0.13	0.81
AT5G35407	miR396b	337.81	407.56	361	358.54	372.69	359.77	N.S.	1.3	0.38	0.4
AT4G13555	miR397b	2.5	2.89	2.84	4.68	2.69	3.76	N.S.	0.89	-0.17	0.88
AT2G03445	miR398a	27.15	45.57	25.36	23.71	36.36	24.54	N.S.	1.88	0.91	0.32
AT5G14545	miR398b	382.01	424.25	312.55	365.03	403.13	338.79	N.S.	1.48	0.57	0.1
AT5G14565	miR398c	382.06	425.03	312.63	364.91	403.54	338.77	N.S.	1.49	0.58	0.1
AT1G63005	miR399b	3.28	3.38	10.32	9.36	3.33	9.84	DOWN	0.42	-1.26	0
AT5G62162	miR399c	3.28	3.45	10.71	9.48	3.37	10.1	DOWN	0.41	-1.28	0
AT1G32582	miR400	10.06	5.42	14.1	15.01	7.74	14.55	N.S.	0.65	-0.62	0.22
AT1G77235	miR402	13.03	10.56	10.16	11.59	11.8	10.87	N.S.	1.34	0.42	0.42
AT2G47275	miR403	2113.22	1351.71	1649.97	2160.08	1732.47	1905.03	N.S.	1.11	0.15	0.78
AT2G32698	miR407	2.92	2.25	3.47	4.44	2.59	3.95	N.S.	0.81	-0.31	0.74
AT2G47015	miR408	146.86	249.17	131.62	132.12	198.02	131.87	N.S.	1.92	0.94	0.31
AT1G09687	miR4228	6.31	7.18	4.1	4.2	6.74	4.15	UP	2.03	1.02	0.05
AT5G07875	miR4245	19.07	10	16.62	24.91	14.54	20.77	N.S.	0.85	-0.23	0.73
AT4G03445	miR447a	40.91	29.23	37.26	47	35.07	42.13	N.S.	1.02	0.03	0.97
AT4G03455	miR447b	40.7	29.16	37.02	46.64	34.93	41.83	N.S.	1.03	0.04	0.96
AT1G12294	miR472a	17.04	19.37	14.81	14.65	18.2	14.73	N.S.	1.54	0.62	0.15
AT2G07205	miR5012	32.42	27.11	9.45	11.23	29.77	10.34	UP	3.56	1.83	0
AT1G08813	miR5014b	3.8	2.39	6.46	7.2	3.1	6.83	N.S.	0.56	-0.84	0.15
AT1G07243	miR5024	8.18	6.55	5.83	4.68	7.37	5.26	N.S.	1.73	0.79	0.13
AT4G06075	miR5026	48.68	46.27	23.08	26.53	47.47	24.81	UP	2.38	1.25	0
AT4G05800	miR5028	11.26	8.66	2.68	3.24	9.96	2.96	UP	4.14	2.05	0
AT2G07910	miR5595a	55.92	22.25	81.21	104.33	39.09	92.77	N.S.	0.5	-0.99	0.3
AT5G03145	miR5635a	26.21	18.8	40.41	36.44	22.51	38.42	N.S.	0.72	-0.48	0.24
AT1G08053	miR5635b	25.07	18.87	32.69	28.75	21.97	30.72	N.S.	0.88	-0.19	0.73
AT4G07565	miR5635c	18.03	14.37	18.9	19.57	16.2	19.24	N.S.	1.04	0.05	0.94
AT4G04095	miR5635d	27.41	20.99	38.44	33.26	24.2	35.85	N.S.	0.83	-0.27	0.58
AT1G04393	miR5640	11.88	6.06	8.43	11.29	8.97	9.86	N.S.	1.11	0.15	0.87
AT3G06345	miR5642a	326.92	353.97	273.33	264	340.44	268.66	UP	1.58	0.66	0.04
AT2G03855	miR5642b	235.09	244.17	177.7	166.16	239.63	171.93	UP	1.73	0.79	0.01
AT5G06175	miR5644	7.14	5.42	9.77	8.04	6.28	8.91	N.S.	0.87	-0.2	0.79
AT3G07695	miR5645a	17.56	13.31	19.93	20.53	15.44	20.23	N.S.	0.94	-0.09	0.89
AT4G05305	miR5645b	14.85	11.41	17.17	17.11	13.13	17.14	N.S.	0.94	-0.09	0.91
AT1G07137	miR5645d	9.43	7.18	9.61	10.26	8.31	9.94	N.S.	1.03	0.04	0.97
AT4G05455	miR5645e	4.01	3.94	5.44	6.18	3.98	5.81	N.S.	0.85	-0.24	0.78
AT5G05505	miR5645f	9.48	8.31	15.44	15.01	8.9	15.22	N.S.	0.72	-0.47	0.34
AT1G08287	miR5647	10.21	6.41	5.28	5.04	8.31	5.16	UP	1.97	0.98	0.04
AT2G09995	miR5650	58.99	29.23	69.16	74.13	44.11	71.65	N.S.	0.74	-0.43	0.39
AT3G07515	miR5651	30.7	25.57	23.47	28.21	28.13	25.84	N.S.	1.35	0.43	0.31
AT1G08597	miR5652	9.8	8.24	10.56	11.89	9.02	11.22	N.S.	0.99	-0.01	0.99
AT1G06597	miR5654	6.1	7.54	2.68	3.72	6.82	3.2	UP	2.64	1.4	0
AT1G04423	miR5656	5.21	5.42	1.34	2.34	5.32	1.84	UP	3.56	1.83	0
AT5G04415	miR5657	13.91	11.69	6.46	6.48	12.8	6.47	UP	2.45	1.29	0
AT5G06105	miR5659	4.53	3.52	4.88	5.16	4.03	5.02	N.S.	0.99	-0.02	0.99
AT2G09120	miR5662	8.18	4.44	11.19	14.29	6.31	12.74	N.S.	0.61	-0.72	0.16
AT1G07633	miR5663	15.27	11.48	14.73	17.47	13.37	16.1	N.S.	1.02	0.03	0.97
AT5G07055	miR5665	6.93	4.23	10.56	9.12	5.58	9.84	N.S.	0.69	-0.53	0.38
AT2G07915	miR5995b	55.92	22.25	81.21	104.33	39.09	92.77	N.S.	0.5	-0.99	0.3
AT1G35501	miR773a	148.11	168.67	80.66	74.79	158.39	77.73	UP	2.55	1.35	0
AT1G06903	miR773b	7.35	3.94	4.96	8.7	5.65	6.83	N.S.	1.01	0.01	0.99
AT1G78206	miR775a	67.75	54.16	82.63	86.8	60.95	84.71	N.S.	0.88	-0.18	0.71
AT2G22496	miR779A	37.21	33.73	33.16	40.88	35.47	37.02	N.S.	1.19	0.25	0.61
AT1G21202	miR781a	35.54	18.94	44.98	51.14	27.24	48.06	N.S.	0.69	-0.54	0.22
AT1G05637	miR781b	34.55	18.59	43.24	48.98	26.57	46.11	N.S.	0.7	-0.52	0.25
AT2G09080	miR8121	5.37	4.51	6.07	5.94	4.94	6	N.S.	1.01	0.02	0.99
AT1G04993	miR8166	1.67	1.69	4.33	4.08	1.68	4.21	N.S.	0.49	-1.02	0.15
AT2G07315	miR8167a	10.21	7.04	13.47	13.87	8.63	13.67	N.S.	0.77	-0.37	0.51
AT3G07755	miR8167b	10.21	7.04	13.47	13.87	8.63	13.67	N.S.	0.77	-0.37	0.51
AT3G08150	miR8167c	10.21	7.04	13.47	13.87	8.63	13.67	N.S.	0.77	-0.37	0.51
AT5G03225	miR8167d	10.21	7.04	13.47	13.87	8.63	13.67	N.S.	0.77	-0.37	0.51
AT5G08800	miR8167e	10.21	7.04	13.47	13.87	8.63	13.67	N.S.	0.77	-0.37	0.51
AT5G08925	miR8167f	10.21	7.04	13.47	13.87	8.63	13.67	N.S.	0.77	-0.37	0.51
AT3G04655	miR8169	4.33	3.38	9.45	7.92	3.85	8.69	N.S.	0.55	-0.87	0.09
AT4G05925	miR8172	4.74	4.16	9.22	9	4.45	9.11	N.S.	0.6	-0.73	0.16
AT2G05455	miR8175	6.98	6.9	8.43	6.6	6.94	7.52	N.S.	1.14	0.19	0.81
AT4G07080	miR8176	10.94	12.18	11.03	9.78	11.56	10.41	N.S.	1.39	0.47	0.4
AT4G09735	miR8178	3.54	2.89	4.49	3.6	3.22	4.05	N.S.	0.98	-0.03	0.98
AT2G04935	miR8180	5.32	4.16	6.22	5.34	4.74	5.78	N.S.	1.01	0.01	0.99
AT3G09615	miR8182	4.27	3.1	2.99	3.9	3.69	3.45	N.S.	1.31	0.39	0.64
AT5G03552	miR822a	524.38	418.06	542.56	585.81	471.22	564.18	N.S.	1.03	0.04	0.95
AT3G13724	miR823a	12.77	11.76	13	18.13	12.26	15.56	N.S.	0.97	-0.04	0.97
AT4G24415	miR824a	64.94	48.17	68.21	75.09	56.55	71.65	N.S.	0.97	-0.05	0.94
AT1G32713	miR829a	362.15	273.05	138.08	171.56	317.6	154.82	UP	2.51	1.33	0
AT1G78478	miR833a	6.1	5.21	4.25	4.5	5.65	4.38	N.S.	1.59	0.67	0.26
AT1G09817	miR833b	5.52	4.23	3.39	3.96	4.87	3.67	N.S.	1.64	0.71	0.27
AT1G76062	miR835a	11.26	8.66	7.72	12.19	9.96	9.95	N.S.	1.23	0.3	0.65
AT1G18879	miR837-3p	22.93	11.41	10.24	18.25	17.17	14.24	N.S.	1.46	0.55	0.37
AT2G02741	miR840A	22.25	20.49	16.54	19.75	21.37	18.15	N.S.	1.45	0.54	0.19
AT4G13564	miR841A	5.16	4.93	0.71	0.96	5.04	0.83	UP	7.41	2.89	0
AT4G04835	miR841b	6.57	5.63	1.97	2.4	6.1	2.19	UP	3.43	1.78	0
AT1G61224	miR842a	11.31	13.73	13.55	14.11	12.52	13.83	N.S.	1.13	0.18	0.8
AT1G61224	miR842aa	11.31	13.73	13.55	14.11	12.52	13.83	N.S.	1.13	0.18	0.8
AT4G23387	miR845a	41.33	49.44	2.44	2.94	45.38	2.69	UP	21.11	4.4	0
AT1G61226	miR846a	780.74	545.39	872.68	958.04	663.06	915.36	N.S.	0.89	-0.17	0.7
AT5G13887	miR848a	13.5	11.69	10.71	14.41	12.59	12.56	N.S.	1.24	0.31	0.59
AT4G13493	miR850a	4.27	4.86	1.18	1.32	4.57	1.25	UP	4.53	2.18	0
AT1G71002	miR858	73.38	80.99	55.06	44	77.18	49.53	UP	1.95	0.96	0
AT1G09213	miR858b	19.44	20.07	17.96	12.43	19.76	15.19	N.S.	1.61	0.69	0.13
AT5G26038	miR860a	6.72	3.1	4.88	6.24	4.91	5.56	N.S.	1.07	0.1	0.93
AT2G25171	miR862a	4.85	3.87	1.65	2.34	4.36	2	UP	2.68	1.42	0.01
AT4G13494	miR863_3p	7.82	4.58	5.75	6.84	6.2	6.3	N.S.	1.21	0.27	0.73
AT5G15833	miR865a	38.3	28.31	23.55	32.35	33.31	27.95	N.S.	1.46	0.55	0.17
AT5G40384	miR866a	3.28	3.03	2.13	3.48	3.16	2.8	N.S.	1.39	0.47	0.6
AT5G39693	miR869a	31.27	20.85	43.95	57.69	26.06	50.82	N.S.	0.63	-0.67	0.07
AT5G52797	miR870a	2.81	1.27	3.47	5.28	2.04	4.37	N.S.	0.57	-0.81	0.32
